# Supplementary material for: Small RNA and Degradome Sequencing in Floral Bud Reveal Roles of miRNAs in Dormancy Release of Chimonanthus praecox
Source: Int J Mol Sci. 2023 Feb 20;24(4):4210. doi: 10.3390/ijms24044210 (PMC9964840; doi:10.3390/ijms24044210)

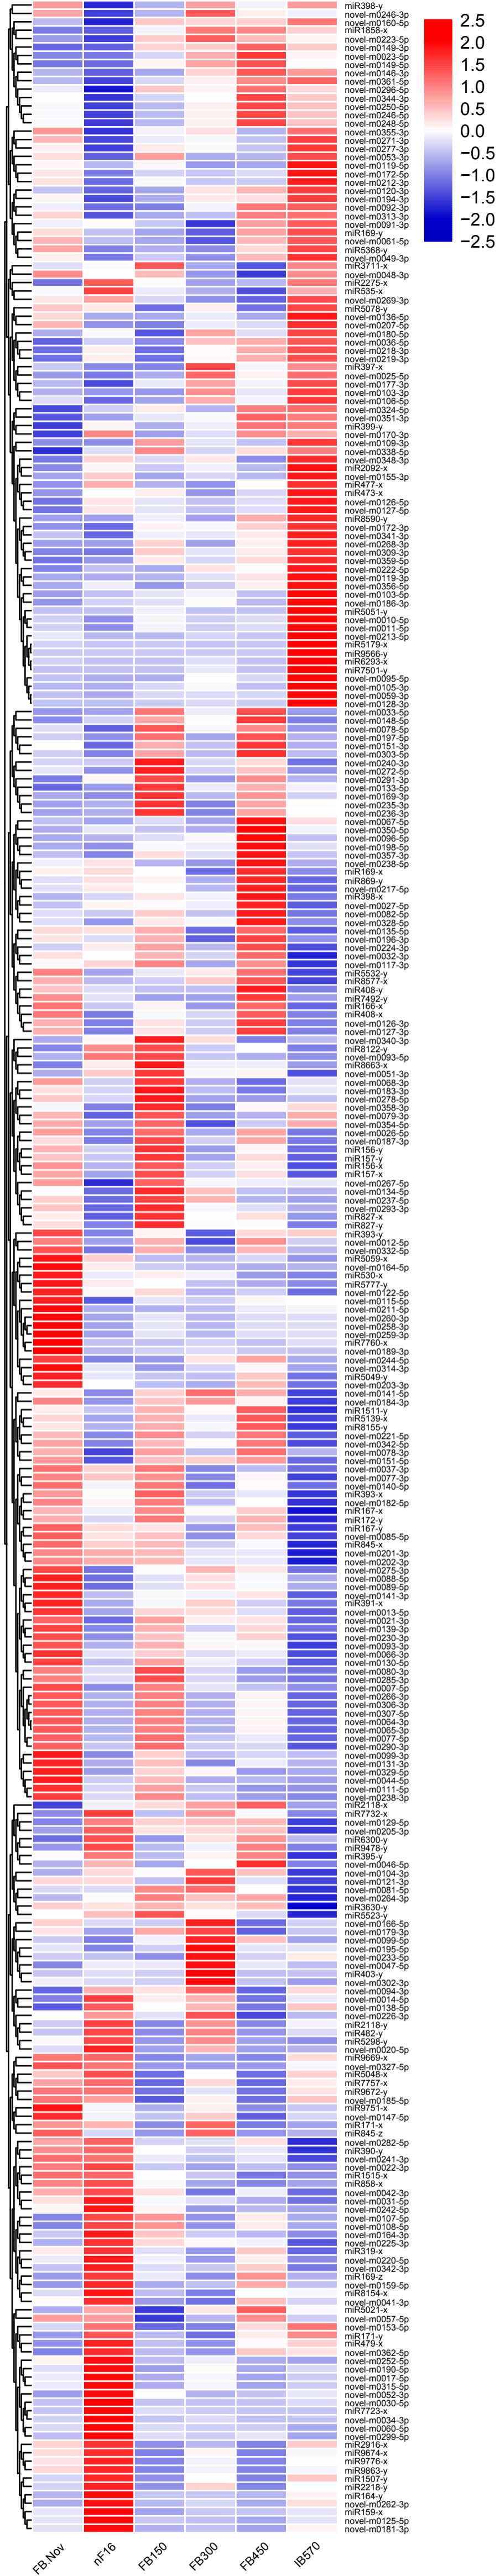

miR398-y  
novel-m0246-3p  
novel-m0160-5p  
miR169-x  
novel-m0223-5p  
novel-m0149-3p  
novel-m0023-5p  
novel-m0149-5p  
novel-m0146-3p  
novel-m0361-5p  
novel-m0296-5p  
novel-m0344-3p  
novel-m0250-5p  
novel-m0246-5p  
novel-m0248-5p  
novel-m0355-3p  
novel-m0271-3p  
novel-m0271-3p  
novel-m0053-3p  
novel-m0119-5p  
novel-m0172-5p  
novel-m0212-3p  
novel-m0120-3p  
novel-m0194-3p  
novel-m0092-3p  
novel-m0313-3p  
novel-m0091-3p  
miR169-y  
novel-m0061-5p  
miR398-y  
novel-m0049-3p  
miR3711-x  
novel-m0048-3p  
miR2275-x  
miR535-x  
novel-m0269-3p  
miR5078-y  
novel-m0136-5p  
novel-m0207-5p  
novel-m0180-5p  
novel-m0136-5p  
novel-m0218-3p  
novel-m0219-3p  
miR397-x  
novel-m0025-5p  
novel-m0177-3p  
novel-m0103-3p  
novel-m0106-5p  
novel-m0324-5p  
novel-m0351-3p  
miR399-y  
novel-m0170-3p  
novel-m0109-3p  
novel-m0338-5p  
novel-m0348-3p  
miR2092-x  
novel-m0155-3p  
miR477-x  
miR473-x  
novel-m0126-5p  
novel-m0127-5p  
miR5590-y  
novel-m0172-3p  
novel-m0341-3p  
novel-m0268-3p  
novel-m0309-3p  
novel-m0369-5p  
novel-m0222-5p  
novel-m0119-3p  
novel-m0356-5p  
novel-m0103-5p  
novel-m0186-3p  
miR5051-y  
novel-m0010-5p  
novel-m0011-5p  
novel-m0213-5p  
miR5179-x  
miR9566-y  
miR6293-x  
miR7501-y  
novel-m0095-5p  
novel-m0105-3p  
novel-m0059-3p  
novel-m0128-3p  
novel-m0033-5p  
novel-m0148-5p  
novel-m0078-5p  
novel-m0197-5p  
novel-m0151-3p  
novel-m0303-5p  
novel-m0240-3p  
novel-m0272-5p  
novel-m0291-3p  
novel-m0133-5p  
novel-m0169-3p  
novel-m0235-3p  
novel-m0236-3p  
novel-m0067-5p  
novel-m0350-5p  
novel-m0196-5p  
novel-m0198-5p  
novel-m0357-3p  
novel-m0238-5p  
miR169-x  
miR869-y  
novel-m0217-5p  
miR398-x  
novel-m0027-5p  
novel-m0082-5p  
novel-m0328-5p  
novel-m0135-5p  
novel-m0196-3p  
novel-m0224-3p  
novel-m0032-3p  
novel-m0117-3p  
miR5532-y  
miR8577-x  
miR408-y  
miR7492-y  
miR166-x  
miR408-x  
novel-m0126-3p  
novel-m0127-3p  
novel-m0340-3p  
miR8122-y  
novel-m0093-5p  
miR8663-x  
novel-m0051-3p  
novel-m0068-3p  
novel-m0183-3p  
novel-m0278-5p  
novel-m0358-3p  
novel-m0070-3p  
novel-m0354-5p  
novel-m0026-5p  
novel-m0187-3p  
miR156-y  
miR157-y  
miR156-x  
miR157-x  
novel-m0267-5p  
novel-m0134-5p  
novel-m0237-5p  
novel-m0293-3p  
miR827-x  
miR827-y  
miR393-y  
novel-m0012-5p  
novel-m0332-5p  
miR5059-x  
novel-m0164-5p  
miR530-x  
miR5777-y  
novel-m0122-5p  
novel-m0115-5p  
novel-m0211-5p  
novel-m0260-3p  
novel-m0258-3p  
novel-m0259-3p  
miR7760-x  
novel-m0189-3p  
novel-m0244-5p  
novel-m0314-3p  
miR5049-y  
novel-m0203-3p  
novel-m0141-5p  
novel-m0184-3p  
miR1511-y  
miR5139-x  
miR8155-y  
novel-m0221-5p  
novel-m0342-5p  
novel-m0078-3p  
novel-m0151-5p  
novel-m0037-3p  
novel-m0077-3p  
novel-m0140-5p  
miR393-x  
novel-m0182-5p  
miR167-x  
miR172-y  
miR167-y  
novel-m0085-5p  
miR845-x  
novel-m0201-3p  
novel-m0202-3p  
novel-m0275-3p  
novel-m0088-5p  
novel-m0089-5p  
novel-m0141-3p  
miR391-x  
novel-m0013-5p  
novel-m0021-3p  
novel-m0139-3p  
novel-m0230-3p  
novel-m0093-3p  
novel-m0066-3p  
novel-m0130-5p  
novel-m0080-3p  
novel-m0265-3p  
novel-m0007-5p  
novel-m0266-3p  
novel-m0306-3p  
novel-m0307-5p  
novel-m0064-3p  
novel-m0065-3p  
novel-m0077-5p  
novel-m0290-3p  
novel-m0099-3p  
novel-m0131-3p  
novel-m0329-5p  
novel-m0044-5p  
novel-m0111-5p  
novel-m0238-3p  
miR2118-x  
miR7732-x  
novel-m0129-5p  
novel-m0205-3p  
miR6300-y  
miR9478-y  
miR395-y  
novel-m0046-5p  
novel-m0104-3p  
novel-m0121-3p  
novel-m0081-5p  
novel-m0264-3p  
miR3630-y  
miR5523-y  
novel-m0166-5p  
novel-m0179-3p  
novel-m0099-5p  
novel-m0195-5p  
novel-m0233-5p  
novel-m0047-5p  
miR403-y  
novel-m0302-3p  
novel-m0094-3p  
novel-m0014-5p  
novel-m0138-5p  
novel-m0228-3p  
miR2118-y  
miR482-y  
miR5296-y  
novel-m0020-5p  
miR9669-x  
novel-m0327-5p  
miR5048-x  
miR7757-x  
miR9672-y  
novel-m0185-5p  
miR3751-x  
novel-m0147-5p  
miR171-x  
miR845-z  
novel-m0282-5p  
miR390-y  
novel-m0241-3p  
novel-m0022-3p  
miR1515-x  
miR858-x  
novel-m0042-3p  
novel-m0031-5p  
novel-m0242-5p  
novel-m0107-5p  
novel-m0108-5p  
novel-m0164-3p  
novel-m0225-3p  
miR319-x  
novel-m0220-5p  
novel-m0342-3p  
miR169-z  
novel-m0169-5p  
miR8154-x  
novel-m0041-3p  
miR5021-x  
novel-m0057-5p  
novel-m0153-5p  
miR171-y  
miR479-x  
novel-m0362-5p  
novel-m0252-5p  
novel-m0190-5p  
novel-m0017-5p  
novel-m0315-5p  
novel-m0052-3p  
novel-m0030-5p  
miR7723-x  
novel-m0034-3p  
novel-m0060-5p  
novel-m0299-5p  
miR2516-x  
miR9674-x  
miR9776-x  
miR9863-y  
miR1507-y  
miR2218-y  
miR164-y  
novel-m0262-3p  
miR159-x  
novel-m0125-5p  
novel-m0181-3p

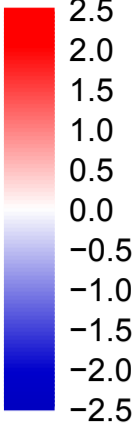

Supplement: Supplementary file 1 [file ijms-24-04210-s001.zip › Figure S2. Heatmap of 301 differentially expressed miRNAs (DEMs).pdf]
