# Supplementary material for: Small RNA and Degradome Sequencing in Floral Bud Reveal Roles of miRNAs in Dormancy Release of Chimonanthus praecox
Source: MDPI journal article supplement (doi:10.3390/ijms24044210), 2023-02-20
Supplement: s1 [file s1]

## Supplementary Figures

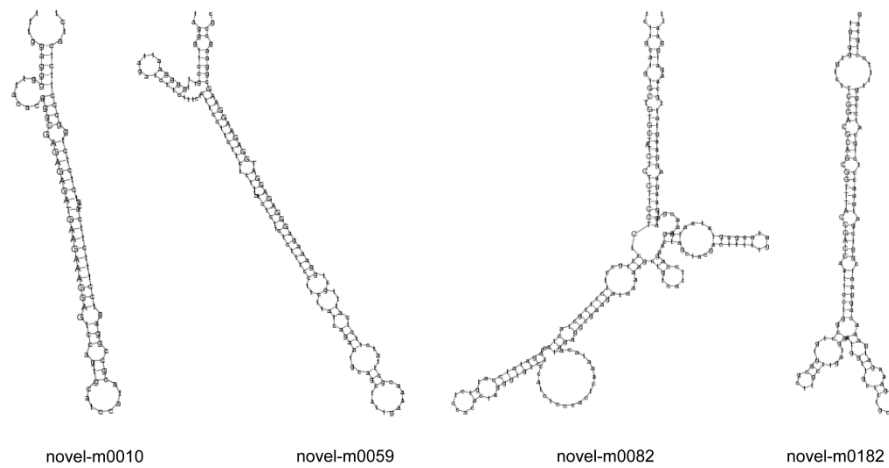

**Figure S1.** Predicted secondary structures of several novel miRNAs precursors. Mireap\_v0.2 software with default parameters was used to prepare the hairpin structures of these novel miRNAs. Capital letters indicate mature miRNAs sequence.

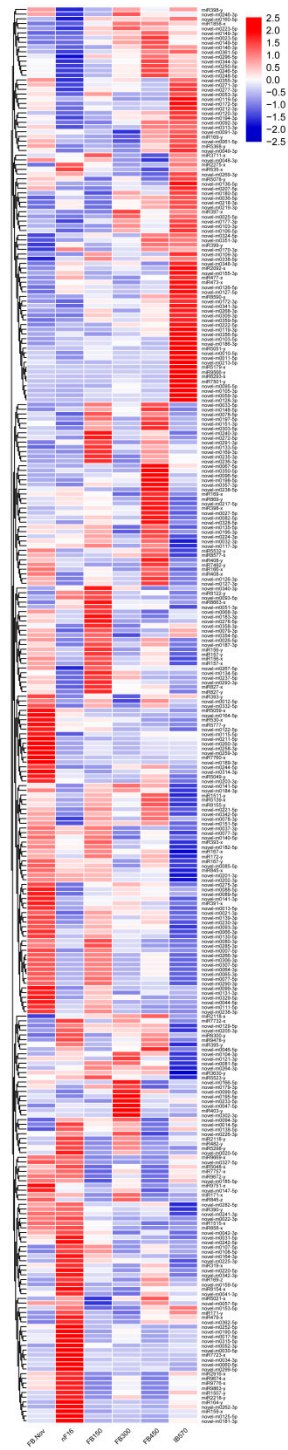

**Figure S2.** Heatmap of 301 differentially expressed miRNAs (DEMs) screened by comparisons in pairs among all 6 samples. Red represents up-regulation and blue represents down-regulation. It was completed by TBtools software with that the expression values of miRNAs were normalized using Z-score normalization.

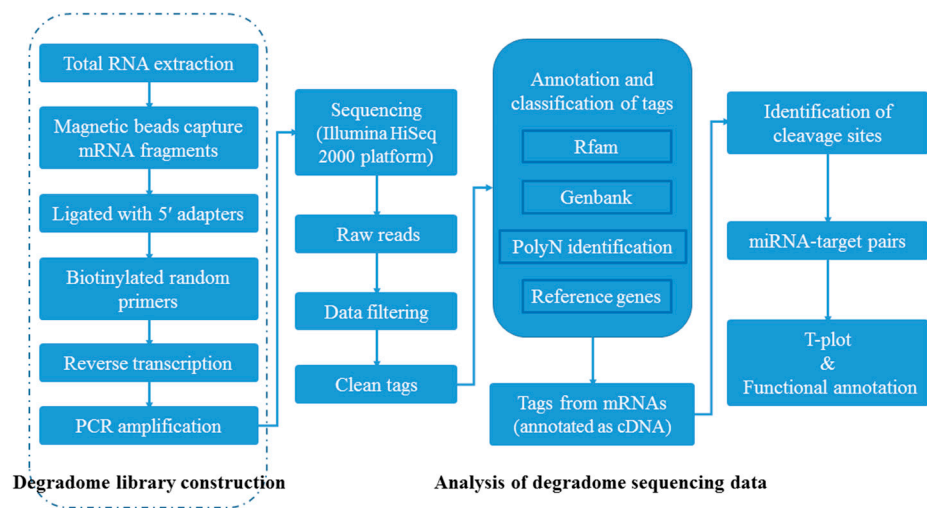

**Figure S3.** The process of the degradome sequencing
