# Supplementary material for: Small RNA and Degradome Sequencing in Floral Bud Reveal Roles of miRNAs in Dormancy Release of Chimonanthus praecox
Source: Int J Mol Sci. 2023 Feb 20;24(4):4210. doi: 10.3390/ijms24044210 (PMC9964840; doi:10.3390/ijms24044210)
Supplement: Supplementary file 1 [file ijms-24-04210-s001.zip]

Archive with 19 entries (19 files):
- Figure S1. Predicted secondary structures of several novel miRNAs precursors.pdf
- Figure S1. Predicted secondary structures of several novel miRNAs precursors.tif
- Figure S2. Heatmap of 301 differentially expressed miRNAs (DEMs).pdf
- Figure S2. Heatmap of 301 differentially expressed miRNAs (DEMs).tif
- Figure S3. The process of the degradome sequencing.pdf
- Figure S3. The process of the degradome sequencing.tif
- Supplementary Figures.pdf
- Table S1. The known miRNAs identified in wintersweet floral buds.xlsx
- Table S10. 1707 target genes predicted by Degradome Sequencing.xlsx
- Table S11. 1940 miRNA-target pairs predicted by Degradome Sequencing.xlsx
- Table S12. GO enrichment analysis of DEMs target genes .xlsx
- Table S2. The families of known miRNAs identified in wintersweet floral buds.xlsx
- Table S3. The pre-miRNAs of known miRNAs identified in wintersweet floral buds.xlsx
- Table S4. The novel miRNAs identified in wintersweet floral buds.xlsx
- Table S5. The charaterization of novel miRNAs identified in wintersweet floral buds.xlsx
- Table S6. The precursor with two mature miRNAs identified in wintersweet floral buds.xlsx
- Table S7. 301 differentially expressed miRNAs identified in wintersweet floral buds .xlsx
- Table S8. 23 shared differentially expressed miRNAs identified among five groups.xlsx
- Table S9. Statistics of miRNA-target pairs identified.xlsx
