# Supplementary material for: Small RNA and Degradome Sequencing in Floral Bud Reveal Roles of miRNAs in Dormancy Release of Chimonanthus praecox
Source: Int J Mol Sci. 2023 Feb 20;24(4):4210. doi: 10.3390/ijms24044210 (PMC9964840; doi:10.3390/ijms24044210)
Supplement: Supplementary file 1 [file ijms-24-04210-s001.zip › Table S1. The known miRNAs identified in wintersweet floral buds.xlsx]

## Sheet: Table S1
Table S1. The known miRNAs identified in wintersweet floral buds
id	length	seq	total_count	FB.NOV-1_count	FB.NOV-2_count	FB.NOV-3_count	FB150-1_count	FB150-2_count	FB150-3_count	FB300-1_count	FB300-2_count	FB300-3_count	FB450-1_count	FB450-2_count	FB450-3_count	IB570-1_count	IB570-2_count	IB570-3_count	nF16-1_count	nF16-2_count	nF16-3_count
miR166-y	21	TCGGACCAGGCTTCATTCCCC	31649892	1122498	1648705	1819751	2267836	1815956	1362464	1860193	1849155	2253817	1913462	1373618	1850942	2017710	2162537	1897973	1731739	1144433	1557103
miR396-x	21	TTCCACAGCTTTCTTGAACTT	27464586	992632	1244914	1392467	1911985	1504419	1098286	1229022	1482212	2107264	1459592	1154902	1635200	1757498	2642016	2528656	1472753	756328	1094440
miR167-x	22	TGAAGCTGCCAGCATGATCTGA	4497731	139119	379506	313484	433575	346591	260214	218380	264190	362749	274113	201331	377915	89329	134279	114133	253117	138577	197129
miR159-y	20	TTTGGATTGAAGGGAGCTCC	4397288	257992	172675	199931	263789	172183	140044	233252	153886	305693	168891	187090	276616	472686	352696	421536	266564	182889	168875
miR162-y	21	TCGATAAACCTCTGCATCCGG	2741085	199112	175346	184260	200542	165465	118685	185815	128605	181527	110021	94943	136751	161704	134541	147234	170135	115029	131370
miR168-x	21	TCGCTTGGTGCAGGTCGGGAA	843740	38979	42077	48215	62362	52200	39124	41121	50568	56974	61069	38842	55235	47382	53030	53100	46983	21417	35062
miR319-y	20	TTGGACTGAAGGGAGCTCCC	537971	29593	24101	21651	28702	20791	18900	36112	22611	32786	29134	21663	24059	54656	35451	34649	50977	21981	30154
miR535-x	21	TGACAACGAGAGAGAGCACGG	262737	8749	16060	13517	19448	14433	9932	11447	11986	16586	11561	6417	9765	21605	21942	20786	20922	11685	15896
miR166-x	21	GGAATGTTGTCTGGCTCGAGG	152203	12778	8605	11879	7874	11692	8002	5258	7156	6246	22242	8835	7789	7031	5069	4105	5587	2758	9297
miR894-x	18	TTCACGTCGGGTTCACCA	138477	3951	9979	8678	11446	6176	5310	6459	6113	9428	9040	7757	10048	10072	5953	5514	7516	9667	5370
miR394-x	20	TTGGCATTCTGTCCACCTCC	132371	3109	8018	10996	10828	7790	6999	5744	7154	10885	6096	4792	7008	5074	6186	7694	6850	7775	9373
miR384-x	20	TTGGCATTCTGTCCACCTCC	128065	3001	7882	10809	10622	7643	6851	5611	6964	10605	5920	4656	6818	4585	5544	6971	6732	7643	9208
miR164-x	21	TGGAGAAGCAGGGCACGTGCA	114717	4631	4791	6230	9192	7179	5079	4335	5808	9403	5485	3879	7566	6312	7171	8387	5946	6605	6718
miR171-y	21	CGAGCCGAATCAATATCACCC	83216	2247	1404	1884	3951	3160	2386	1049	1485	1957	5937	2956	6122	8087	9649	10496	6232	4721	9493
miR156-x	21	TTGACAGAAGATAGAGAGCAC	79867	4118	6272	6301	9637	6924	5768	3048	3797	5536	3513	4060	6298	1805	2165	2264	4322	1302	2737
miR156-z	21	TTGACAGAAGAGAGAGAGCAC	66616	2581	5937	6463	4839	3831	2464	3011	3174	3839	4747	3083	5765	3483	1777	1869	2544	2664	4545
miR827-y	21	CTAGATGATCATCAACAAACT	64762	1885	3158	5974	7863	5951	5274	2506	5218	3985	3776	3413	3102	1716	3030	2841	1800	329	2941
miR157-x	21	TTGACAGAAGATAGAGAGCAC	64610	2877	5217	5332	8598	6172	5120	1991	3181	4583	2589	3620	5657	682	1605	1742	3039	767	1838
miR168-y	21	TCCCTACTTGCATCAACTGAA	53431	1841	3133	3708	3678	3700	2692	1720	3950	3975	5580	2437	2846	1885	3307	3038	1504	1482	2955
miR390-x	21	AAGCTCAGGAGGGATAGCGCC	45395	1663	2472	3011	3355	2937	1945	1371	2366	3071	2571	2127	2906	1867	2889	3275	1814	2322	3433
miR164-y	21	CATGTGCTCATCTTCTCCATC	43683	985	1162	1724	2331	1985	1126	1281	1502	2980	1164	1114	1863	2490	3316	4623	4115	4944	4978
miR529-x	21	AGAAGAGAGAGAGCACAGCCC	34132	2449	2461	2495	2526	2423	1594	1135	2164	1830	3719	1628	1962	1285	1590	1418	1299	701	1453
miR160-x	21	TGCCTGGCTCCCTGTATGCCG	31548	1512	2140	2146	2652	2103	1317	724	1516	2069	1865	1489	2163	967	2307	2364	1086	1407	1721
miR5054-y	18	TCCCCACGGACGGCGCCA	26284	1130	1953	1761	2245	1145	1018	1411	1158	1654	1470	1299	1247	1983	941	777	1873	2045	1174
miR396-y	20	CTCAAGAAAGCTGTGGGAAA	23106	779	1324	1625	1488	1503	1323	716	904	1468	1785	1254	1582	791	1287	1122	1274	1008	1873
miR5168-y	21	TCGGACCAGGCTTCAATCCCC	18254	653	853	962	1312	994	817	1105	979	1308	1121	764	1153	1162	1344	1078	1095	704	850
miR165-y	21	TCGGACCAGGCTTCATACCCC	15293	649	790	872	1176	908	667	928	868	1094	918	608	836	936	1010	936	854	536	707
miR166-z	21	TATCGGACCAGGCTTCATTCC	13232	561	527	606	913	702	539	1035	663	862	741	509	739	963	864	984	842	562	620
miR393-x	22	TTCCAAAGGGATCGCATTGATT	12632	585	952	950	1264	1012	907	672	575	735	640	517	805	355	430	404	946	359	524
miR167-y	21	AGATCATGTGGCAGTTTCACC	9075	1080	521	612	608	709	512	283	314	439	765	611	618	104	179	178	612	285	645
miR5139-x	18	AACCTGGCTCTGATACCA	7685	107	643	601	690	460	451	199	468	713	572	530	684	181	381	304	97	346	258
miR477-x	21	ACTCTCCCTCAAGGGCTTCCT	7305	24	15	16	173	143	100	8	17	60	466	216	469	1137	1470	1467	554	409	561
miR479-x	22	CGTGATATTGATTCGGCTCATC	6859	25	54	68	201	232	172	28	63	72	432	302	475	503	888	721	606	460	1557
miR1511-y	18	AACCTGGCTCTGATACCA	6795	84	547	490	621	376	385	173	483	652	511	447	540	140	328	319	92	366	241
miR8155-y	18	AACCTGGCTCTGATACCA	6548	78	530	498	617	369	381	174	408	640	503	449	550	143	328	250	90	307	233
miR2950-x	21	TTCCATCTCTTGCACACTGGA	5855	804	192	281	359	298	240	177	247	401	249	225	331	248	493	493	302	244	271
miR171-z	21	TTGAGCCGCGCCAATATCACT	5486	278	333	369	502	426	276	210	378	390	377	275	330	199	270	283	248	111	231
miR398-y	21	ATGTGTTCTCAGGTCGCCCCT	4716	280	277	283	256	239	135	232	457	340	280	197	236	313	420	519	111	53	88
miR7767-x	20	CCCCAAGATGAGTGCTCTCC	3627	76	232	262	258	200	144	258	216	321	213	165	170	297	169	184	168	163	131
miR399-y	21	CGCCAAAGGAGAGTTGCCCTT	2990	48	30	90	138	128	103	117	228	146	273	204	195	310	266	301	192	93	128
miR6478-x	20	CCGACCTTAGCTCAGATGGT	2798	125	123	115	255	125	205	252	119	239	173	111	198	173	106	101	170	112	96
miR9478-y	19	GATGAAATATCTGAGCCTT	2767	36	133	111	240	93	64	73	87	373	278	149	230	60	201	93	57	237	252
miR390-y	21	CGCTATCCATCCTGAGTTTTA	2338	162	129	193	155	162	107	121	99	166	142	115	108	42	66	83	179	112	197
miR5072-x	18	TCCCCAGTGAAGTCGCCA	2244	167	162	151	201	96	84	104	103	158	137	108	113	139	84	76	99	161	101
miR156-y	21	GCTCTCTATGCTTCTGTCATC	1995	86	137	175	167	247	187	64	92	73	145	104	92	89	59	42	98	36	102
miR5078-y	20	CCTAGTTCGACCGTGGAATT	1932	308	7	1	6	2	9	336	7	10	3	12	6	826	16	5	374	2	2
miR395-y	20	TGAAGAGTTTGGGGGAACTC	1915	68	102	133	85	81	70	39	248	93	261	88	187	3	11	15	108	116	207
miR530-x	21	TGCATTTGCACCTGCACCTGT	1910	175	197	264	162	109	102	57	115	181	48	47	65	39	55	66	56	72	100
miR398-x	21	GGGACGACATGGGATCACATG	1763	25	77	63	123	136	91	34	171	97	406	134	126	53	16	35	29	64	83
miR5368-y	20	GGGACAGTCTCAGGTAGACA	1710	155	54	96	118	60	55	67	54	79	48	179	56	393	111	52	48	50	35
miR8175-y	18	TCCCCGGCAACGGCGCCA	1606	172	79	103	126	71	71	35	53	105	80	98	143	82	52	41	91	148	56
miR172-y	21	AGAATCTTGATGATGCTGCAT	1416	53	114	107	127	113	108	23	75	141	60	94	133	20	34	40	84	30	60
miR157-y	21	GCTCTCTATGCTTCTGTCATC	1362	44	109	142	117	213	161	24	63	41	119	90	63	9	17	12	50	18	70
miR5059-x	18	ACCTGGGCAGCACCACCA	1316	169	108	85	109	35	47	56	59	71	68	61	62	66	52	63	62	93	50
miR408-y	22	TGCACTGCCTCTTCCCTGGCTT	1210	59	82	85	76	50	38	37	75	51	72	113	196	24	53	57	56	37	49
miR408-x	21	GTAGGGAACAGGCAGAGCATG	1203	86	110	107	97	82	33	43	57	75	102	86	183	13	46	30	26	4	23
miR827-x	21	TCTGTTGATGGTCATCTAATC	1061	17	49	109	134	111	71	53	69	65	48	70	64	27	61	52	21	4	36
miR4995-x	18	GTGGCTTGGTTAAGGGAA	908	33	35	48	76	29	54	50	72	73	51	38	56	85	59	43	14	51	41
miR3630-y	22	CTTGGGAATCTCTCTGATGCTT	890	43	48	55	74	56	50	69	34	73	56	28	91	24	33	31	43	38	44
miR319-x	19	GAGCTTCCTTCAGTCCACT	829	57	44	37	46	55	31	18	40	31	103	55	19	14	28	20	73	44	114
miR7732-x	18	CCAAGATCTCTGAGGCTC	630	13	21	33	54	23	19	50	32	69	37	31	32	37	29	24	42	40	44
miR5179-x	21	TTTTGCTCAAGACGGCGCAGC	566	6	3	6	5	3	1	0	0	4	0	3	2	112	201	217	0	3	0
miR5077-x	21	TTCTTCACGTCGGGTTCACCA	434	20	21	37	30	24	11	37	12	27	18	18	28	50	20	20	32	22	7
miR2916-x	19	AGGGGGCTCGAAGACGATC	389	52	2	12	15	3	10	31	6	5	14	4	5	88	8	10	64	27	33
miR397-x	21	TCATTGAGTGCAGCGTTGATG	343	11	11	14	17	10	3	20	36	47	20	12	18	23	26	51	13	2	9
miR482-y	22	TTTCCGATTCCACCCATTCCTA	326	3	30	4	6	5	9	1	56	54	8	9	5	0	5	56	2	62	11
miR2118-y	22	TTTCCGATTCCACCCATTCCTA	287	0	31	2	5	0	7	1	53	42	6	3	4	4	5	53	1	60	10
miR9863-y	22	TGAGAAGGTAGATCATAATAGC	280	46	0	0	0	0	0	43	0	0	0	0	0	53	0	0	138	0	0
miR2218-y	22	TTTCCGATTCCACCCATTCCTA	232	0	28	1	3	0	7	0	52	7	6	0	3	0	4	53	0	58	10
miR391-x	21	ACGCAGGATAGATGACGCCGG	209	12	22	26	13	15	8	2	26	19	13	12	1	2	11	10	0	7	10
miR9674-x	21	ATAGCATCATCCATCCTACCC	203	32	0	0	0	0	0	37	0	0	0	0	0	39	0	0	95	0	0
miR393-y	21	TCATGCGATCCCTTTGGAATC	200	25	10	9	14	12	10	4	3	10	8	11	18	14	15	22	6	5	4
miR845-x	24	CTTGCTCTGATACCACTTGTTGGG	197	8	14	23	16	11	14	7	8	18	12	7	14	3	4	8	12	11	7
miR171-x	18	ATTGGTCCGGTTCAATTC	185	19	8	10	4	4	8	25	11	19	6	3	6	11	5	9	28	6	3
miR169-x	21	TAGCCAAGGATGATTTGCCGA	178	10	6	13	18	6	9	3	3	5	19	17	23	3	8	8	8	12	7
miR9477-y	21	AAATGGAACGACTGATAGTTG	165	12	10	13	9	5	14	6	9	13	13	6	19	5	8	9	5	5	4
miR7723-x	20	AAAGTATCTTGGCCTTCTCT	152	1	1	2	4	0	9	3	2	2	0	3	0	4	1	0	66	24	30
miR5658-x	19	TATGATGATGATGATGAAT	147	6	6	4	19	9	9	17	4	3	8	6	15	3	8	5	15	6	4
miR403-y	21	TTAGATTCACGCACAAACTCG	144	0	2	1	1	1	3	0	2	123	0	0	1	0	0	3	2	5	0
miR165-x	21	GGAATGTTGTCTGGATCGAGG	119	4	5	8	8	11	6	7	7	4	18	6	4	5	7	5	3	4	7
miR845-y	24	ATGGCTCTGATACCAATTGATAGG	115	2	12	12	16	2	3	5	2	7	11	6	6	3	4	6	3	5	10
miR169-y	21	CGGCATGTTGTCCTTGGCTAC	114	5	5	9	8	4	1	2	2	2	11	5	10	23	2	15	0	3	7
miR5021-x	21	AAGAAGAAGAAGAAGAAGAGA	104	1	3	8	4	0	2	7	1	14	9	8	9	5	8	9	2	8	6
miR5298-y	21	TGGAGATGATGTGAAGATAAA	99	1	9	7	5	0	4	8	10	11	3	4	2	1	5	5	4	8	12
miR1858-x	18	GGAGGACGAAGTGGGGGG	96	5	0	0	9	4	3	7	5	15	9	8	4	9	9	5	1	2	1
miR7782-y	24	ACCTGCTCTGATACCATGTTGAAA	90	2	6	6	8	8	3	0	5	13	4	2	10	1	2	2	3	5	10
miR6300-y	20	GTCGTTGTAGTATAGTGGTA	90	3	0	2	4	2	3	9	1	9	7	5	10	5	3	6	7	5	9
miR2092-x	18	CAGAAGTCGGGGTTTACT	87	0	0	1	2	4	2	7	2	4	1	4	0	31	9	9	3	5	3
miR5049-y	24	AGACAATTAATTTGGGACAGAGGA	82	8	10	12	2	6	2	3	3	4	5	5	9	2	1	0	2	2	6
miR2118-x	22	TTCCCGATGCCTCCCATTCCTA	81	0	2	0	15	4	0	0	6	17	3	14	2	0	2	8	0	6	2
miR8154-x	21	AGAGAAGGAGATGAAGAGGTA	69	4	3	1	5	3	1	0	1	4	1	3	8	3	6	6	4	7	9
miR529-z	19	AGAAGAGAGAGAGCACAGC	66	4	7	4	3	5	6	0	7	4	13	3	1	0	1	2	1	2	3
miR1863-y	24	TTGGCTCTGATACCATGTTAGATT	65	4	6	9	1	7	0	3	4	4	5	4	5	5	1	2	3	1	1
miR7757-x	22	ACAAAACCTTCAGCTATCCATC	65	13	0	0	0	0	0	14	0	0	0	0	0	15	0	0	23	0	0
miR1507-y	22	TCTCATTCCACACATCGTCTAA	59	0	7	0	1	0	1	0	10	1	0	0	1	0	1	19	0	14	4
miR169-z	21	CAAGCCAAGGATGACTTGCCT	56	0	3	0	1	5	2	0	0	3	3	1	14	1	4	1	5	3	10
miR8577-x	24	AATGGCTTAGATGATGATGATGAT	55	5	3	3	1	5	1	1	2	12	10	2	6	0	0	0	1	3	0
miR5211-x	22	TGTCGCAGGAGTGATGGCACCG	52	0	11	0	3	0	5	0	1	2	2	0	0	0	0	12	0	16	0
miR159-x	19	AGCTCCTTTAGATCCAATC	47	2	2	2	0	2	1	5	0	0	3	1	1	2	4	3	10	2	7
miR5532-y	21	TGGAATATATGACAAAGGCGG	46	5	4	2	0	1	5	3	3	4	10	2	2	0	0	1	3	1	0
miR5083-y	21	GAGACTACAATTATCTGATCA	46	6	3	2	1	5	1	5	0	3	2	1	1	4	1	0	4	4	3
miR482-x	19	CTTGAGAGGGTAGGATAAG	43	2	2	1	3	2	4	1	1	4	2	3	2	1	4	6	3	0	2
miR5523-y	21	TGAGGAGGAACATATTTACTA	42	0	5	2	4	9	1	5	0	3	4	1	1	0	0	0	0	2	5
miR5048-x	22	TTTGCAGGTTTTAGGTCTAAGT	41	7	0	0	0	0	0	7	0	0	0	0	0	11	0	0	16	0	0
miR858-x	21	TTCGTTGTCTGTTCGACCTTG	40	4	2	6	2	3	2	0	1	2	0	0	1	0	0	3	4	1	9
miR9776-x	21	TGGACGAGGATGTGCAGCTGC	39	6	0	0	0	0	0	6	0	0	0	0	0	8	0	0	18	1	0
miR9566-y	19	AGCCTAAGTATTCCTCAAC	39	0	0	0	0	0	0	0	0	0	0	0	0	17	10	12	0	0	0
miR869-y	18	GTGCAATTCTGATGTTGA	38	1	0	4	2	2	3	0	1	3	7	6	2	0	0	0	4	1	2
miR5538-x	23	ACTGAACTCAATCACTTGCTGCC	38	5	0	6	2	2	3	1	3	0	3	2	2	0	2	3	0	1	3
miR9751-x	19	AAACCCTAAACCCTAAATT	38	8	4	1	1	3	0	5	0	3	0	1	1	2	3	1	2	2	1
miR9669-x	22	TACTGTGGGCACTTATTTGACA	37	10	0	0	0	0	0	1	0	1	0	0	0	10	0	0	15	0	0
miR9672-y	21	TACCACGACTGTCATTAAGCA	36	9	0	0	0	0	0	5	0	0	0	0	0	9	0	0	13	0	0
miR172-x	21	TAGCATCATCAAGATTCACAC	35	3	3	3	2	5	3	1	2	2	0	1	7	0	0	2	0	0	1
miR7494-y	23	ACAGAGGAAGAAGAAGAAGAGAA	34	1	2	3	3	4	0	2	4	2	0	5	6	1	0	0	0	1	0
miR2275-x	18	ATCGGAGGAAAAGAAACT	33	0	0	0	3	1	2	1	0	1	1	0	2	3	3	8	0	5	3
miR6293-x	19	AACAGGCTGATGACAAAAA	32	0	1	0	0	0	0	0	2	0	0	0	0	12	9	8	0	0	0
miR9726-y	21	TGTAGGCATTATTTTTTTTTT	31	0	0	3	5	0	1	6	1	0	6	0	1	3	2	1	0	1	1
miR9662-y	21	TTGAACATCCCAGAGCCACCG	30	6	0	0	0	0	0	9	0	0	0	0	0	7	0	0	8	0	0
miR473-x	22	ACTCTCCCTCAAGGGCTTCCTC	29	0	0	0	1	2	2	0	0	0	2	0	1	8	4	6	0	2	1
miR8122-y	18	AAAGAAGAGTTGTGGAAA	28	0	0	1	5	3	3	3	0	0	1	1	3	0	1	0	4	2	1
miR8005-y	22	TAGAGTTTAAGGTTTAGGGTTT	25	1	0	4	0	0	3	0	0	3	4	1	4	0	0	1	0	2	2
miR528-x	21	TGGAAGGGGCATGCAGAGGAG	24	0	0	0	2	3	0	0	1	2	0	6	4	0	1	1	0	3	1
miR170-x	21	TATTGGCCTGGTTCACTCAGA	23	0	3	0	0	0	2	0	2	6	0	0	0	0	0	8	0	2	0
miR1515-x	20	TCATTTTTGCGTGTAGTGAT	23	0	5	3	2	0	2	0	1	2	0	0	0	1	0	0	2	1	4
miR3711-x	24	AATGGCGCTAGAAGGAGGGCATGA	23	0	1	2	0	5	2	1	0	1	0	0	0	3	1	4	2	1	0
miR5051-y	18	GGTTTGGCACCTCGAAAC	23	0	0	0	2	0	1	0	0	0	0	0	0	20	0	0	0	0	0
miR812-y	18	CAACTAAAATGGGACGGA	22	5	0	0	0	0	0	1	4	1	0	4	1	3	0	0	0	3	0
miR8590-y	19	CGAGGTGTAGAAAAAAAAA	22	0	0	0	1	2	0	0	0	0	6	0	0	4	3	6	0	0	0
miR529-y	21	GCTGTACCCTCTCTCTTCTCC	21	0	1	0	1	2	0	0	0	3	7	1	2	2	0	0	2	0	0
miR5777-y	18	CATAATGTTGGCTGCACC	21	3	7	1	1	1	2	1	1	0	0	1	0	0	0	0	0	3	0
miR8022-x	18	TTCAAATGAGAATTTTGA	20	0	1	1	0	0	1	1	1	0	0	2	1	7	1	0	0	2	2
miR1134-y	19	ACAACAAGAAGACGAAGAG	20	1	2	0	0	4	0	0	3	1	1	0	2	0	2	1	3	0	0
miR8663-x	21	TTCGAACTTGGCACCTTTTTT	19	0	0	0	3	4	2	0	2	1	0	0	3	0	1	0	2	1	0
miR6173-y	21	AAGCCGTAAACGATGGATACT	19	2	0	1	2	0	1	2	1	2	1	0	0	3	1	0	2	1	0
miR535-z	20	TTGACAGAGAGAGAGAGCAC	18	0	1	5	0	3	0	3	0	0	1	0	3	0	0	0	0	1	1
miR2619-x	19	CGTTTTGATTCTTTGGCAC	18	0	0	4	2	0	0	1	1	0	0	2	2	0	2	2	1	1	0
miR4414-x	20	CGCTGCCGACTCGTTGGCTC	17	1	3	0	0	2	2	0	1	0	1	1	2	0	1	3	0	0	0
miR1888-x	18	TTTGGCTAAGATTTTTGA	17	0	0	1	4	0	2	2	0	0	0	0	4	0	0	0	2	0	2
miR2673-x	20	CTCCTCCTCTTCCTCCTCCA	16	2	0	0	0	1	1	0	0	1	0	1	0	4	2	0	2	2	0
miR7492-y	18	TTTGGCTAAGATTTTTTG	16	3	2	0	0	0	0	0	0	0	5	1	3	0	0	0	2	0	0
miR4349-x	18	ATTGGCTAGAGATAATAT	16	0	4	0	0	2	2	1	0	1	2	2	0	0	1	1	0	0	0
miR854-x	23	GATGAGGAAAGTGAAGAGGAGGA	16	0	1	1	0	1	1	1	0	0	3	0	0	4	2	0	0	2	0
miR5174-y	18	TGCGTGGAACTGAGAGGG	15	0	0	0	2	0	0	2	1	1	0	0	5	2	0	0	2	0	0
miR7760-x	21	GGACAGAAGGCAGCAAGCAGC	15	12	0	0	0	0	0	1	0	0	0	0	0	1	1	0	0	0	0
miR845-z	20	TTGCTCTGATACCATTTGAT	14	3	2	0	0	0	0	2	2	3	0	0	0	0	1	0	0	1	0
miR3699-y	19	TTGACAGAAGATAGAGATT	14	0	1	2	6	0	0	0	0	1	0	0	2	0	0	1	0	1	0
miR828-y	21	TGGGATACTCATTTGAGCAAG	14	0	3	0	5	0	0	0	0	2	0	1	1	0	1	1	0	0	0
miR160-z	22	CATGCCTGGCTCCCTGTATGCT	13	4	0	0	2	1	0	0	1	1	0	1	1	0	2	0	0	0	0
miR6108-x	18	GAGAGTTGAGCTGAAAAG	13	3	0	0	0	0	0	0	0	6	3	0	0	0	0	0	1	0	0
miR5806-y	18	AAAAGGCAACGACAATGA	13	0	0	0	0	1	0	3	1	0	0	0	0	0	1	2	0	3	2
miR5141-y	24	ACCCAACGCGACTGACAGATAAGC	13	0	2	1	2	0	0	0	0	1	2	0	1	2	0	0	0	0	2
miR444-y	21	TGTTGTCTCAAGCTTGCTGCC	12	0	1	0	0	0	0	1	0	0	0	0	0	2	0	0	6	2	0
miR2111-x	21	TAATCTGCATCCTGAGGTTTA	12	2	2	1	0	0	3	0	1	0	0	0	0	2	0	0	0	1	0
miR6470-x	21	TGCTCTGATACCATATTAAAA	12	2	2	0	1	3	0	1	1	0	0	0	2	0	0	0	0	0	0
miR9679-x	21	CAGAACCAGAATGAGTAGCTC	12	2	0	0	0	0	0	0	0	0	0	2	0	3	0	0	5	0	0
miR5721-x	21	AAAGATGAAGTGAGAAATGGA	12	6	0	0	0	1	0	3	2	0	0	0	0	0	0	0	0	0	0
miR7501-y	18	TTCTGACACCAAAAAAAA	12	0	0	0	0	0	0	1	0	0	0	0	0	6	2	3	0	0	0
miR160-y	18	CCGTGCGAGGGGCCAAGC	12	1	1	0	0	0	0	0	0	1	0	0	0	1	1	2	5	0	0
miR397-y	18	ATCAATGCTGCACTCAAC	12	0	3	0	0	0	0	0	0	8	1	0	0	0	0	0	0	0	0
miR1133-x	23	ACCATATACTCCCTCCGTCCCAA	12	0	0	1	1	2	2	0	3	0	0	3	0	0	0	0	0	0	0
miR5641-y	18	GAAGATGATGATAGTATT	11	0	1	1	0	0	1	0	0	1	0	3	0	0	0	0	2	0	2
miR9753-y	18	GAATTTGGGACATAGGGC	11	0	0	0	0	0	0	0	10	0	1	0	0	0	0	0	0	0	0
miR5293-x	19	AATTGGCAGGAAGAAGAAG	11	0	0	1	3	0	0	2	0	1	0	1	0	1	0	0	0	0	2
miR395-z	21	TGCTGAAGTGTTTGGGGGAAC	11	3	1	0	3	2	0	0	0	1	0	0	0	0	0	1	0	0	0
miR1873-x	18	TGAAAATGGTATCAGAGC	11	0	2	0	0	1	1	1	1	0	1	0	1	0	1	0	0	0	2
miR6482-x	19	AGGAACTGGAATAAACCCA	10	0	1	0	0	1	1	0	0	1	0	0	1	0	5	0	0	0	0
miR5653-y	24	AGGGGTTTAGTTGAGTTGAGTTGG	10	0	0	2	2	0	0	1	0	1	0	0	0	0	1	0	3	0	0
miR8774-x	20	TTTGGATTTTGATTCAAAAA	10	2	0	4	2	0	1	0	0	0	0	0	0	0	0	0	0	0	1
miR3932-x	19	GCCGTGCTGGATCTGCTCC	10	1	0	3	2	0	0	3	0	0	1	0	0	0	0	0	0	0	0
miR1120-y	21	TTCTTATACTGTGGGACGGAG	10	3	0	0	0	0	0	0	0	3	0	0	0	2	0	0	2	0	0
miR1030-x	21	TACTGCATCTGCACCTGCTCC	10	0	0	3	0	0	0	0	5	1	0	0	0	0	0	0	0	1	0
miR164-z	22	TGGAGAAGCAGGGCACTTGCAC	10	0	0	0	1	1	2	2	0	2	0	0	0	0	0	1	1	0	0
miR5205-x	19	ATTTGGGACAGAGGGAGTA	10	2	0	0	0	1	0	1	0	0	1	0	0	2	0	0	1	0	2
miR394-y	19	TGGGCATCCTGCCAACGGA	10	0	0	0	2	4	0	0	0	0	0	3	0	0	0	0	0	1	0
miR5020-x	19	ATGGCATGAAAGAAGGGGA	10	0	0	0	1	0	0	0	0	0	0	0	0	8	0	0	0	1	0
miR5380-y	20	AGAAAATGGATGGTGAGGAT	9	0	0	0	2	0	0	0	0	2	0	0	0	2	0	0	2	0	1
miR9746-y	19	ACCTGTTTGAATTTCAATT	9	0	1	0	1	0	0	0	1	1	0	0	0	0	0	0	5	0	0
miR8147-y	18	TACTCGATGAATTAGCAT	9	0	1	0	1	1	2	0	2	1	0	0	0	0	0	0	1	0	0
miR6149-x	21	TTTGATACGCACCTGAATCGG	9	1	0	0	0	0	5	0	0	0	0	0	2	0	1	0	0	0	0
miR9772-x	21	TGAGATGAGATTACCCCATAA	9	0	0	0	0	0	0	2	0	0	0	0	0	1	0	0	6	0	0
miR1171-x	20	AGTGGAGTGGAGAGGAGAGG	9	0	0	0	0	0	0	1	0	1	2	1	0	0	3	1	0	0	0
miR3946-x	18	AAAGAGAAGACAGCAGAA	8	2	0	2	1	0	2	0	0	0	0	0	0	0	0	0	1	0	0
miR158-y	18	CAAATGTAGACAAAGAAA	8	0	2	1	0	0	0	0	0	3	0	0	2	0	0	0	0	0	0
miR9497-x	20	TTTCTGAATACATGTTGTAG	8	0	0	0	2	1	2	0	0	0	0	1	0	2	0	0	0	0	0
miR5071-x	21	TCAAGCATCATGTCATGGACA	8	0	0	0	0	0	0	1	0	0	0	0	0	4	0	0	3	0	0
miR857-y	21	TTTTGTATGTTGGAGGTGTCT	8	0	2	0	0	2	0	0	0	1	1	0	0	0	2	0	0	0	0
miR6450-y	20	TCGAACACAGGACTTAAGGC	8	1	0	1	1	1	0	0	0	0	0	3	0	0	1	0	0	0	0
miR7502-y	19	AAAGGTAGAAATGGATCAA	8	3	2	0	1	0	0	0	0	0	2	0	0	0	0	0	0	0	0
miR9743-x	18	GAGGGCTTTGAAGAAAAA	8	0	0	0	3	0	0	0	3	0	0	1	0	0	1	0	0	0	0
miR9722-x	19	AGAGAGAAGGAGATGAAGA	8	0	0	0	1	0	2	0	1	0	1	1	0	2	0	0	0	0	0
miR6192-y	19	AGAGGGGGGGAGAGATCTT	8	5	0	1	0	0	0	0	0	0	0	0	0	0	0	2	0	0	0
miR4228-y	18	CGTCGGATGCGGAACGGC	8	4	0	0	0	0	0	1	0	0	0	0	0	2	0	0	1	0	0
miR6188-y	18	CGGTGGATCCATGAACCC	8	0	0	0	0	0	0	0	0	1	2	0	0	2	1	2	0	0	0
miR3434-x	18	ACTGGGCTGATTCTGTTA	8	0	3	0	0	1	0	0	0	0	0	0	0	3	0	0	0	1	0
miR1172-y	19	AGAGGATTGCAGCTGCAAG	7	1	0	0	0	0	0	2	0	0	0	3	0	0	0	0	0	0	1
miR9476-y	18	AAGATGCAGGGCTTGACC	7	0	0	0	0	1	0	0	0	1	2	0	0	0	0	2	0	0	1
miR5032-z	22	AGCCACTTTGAGGTTCCCTATG	7	1	0	0	0	0	0	0	0	0	2	1	0	0	0	0	0	0	3
miR9766-x	19	AAAGGAAGGAAAGAAACAA	7	1	0	0	0	0	0	0	0	0	5	0	1	0	0	0	0	0	0
miR5238-x	18	ATAAAAAACAAAGGGCAG	7	0	0	0	0	0	0	0	1	0	0	0	0	5	0	0	0	0	1
miR1156-y	18	TTTCGGCTGTAGCTTCAG	7	2	1	0	0	0	0	0	0	0	0	3	0	0	0	0	1	0	0
miR1857-x	21	CTGGTTTTTGTGGAGCATGAT	7	1	0	0	0	0	0	0	0	1	0	2	0	0	0	0	0	3	0
miR5024-x	20	TGAGAAGGCCAAGATAGAAC	7	0	0	0	1	0	0	0	0	1	0	0	2	3	0	0	0	0	0
miR1079-x	18	ACCGGGCTCTTCTTTTTT	7	0	0	0	1	0	0	0	0	0	1	0	2	0	0	2	0	0	1
miR6107-y	18	GAGGGGACAATATCTTGT	7	0	0	0	0	0	0	0	0	1	0	0	3	3	0	0	0	0	0
miR828-x	24	TCTTGCTCAAATGAGTGTTCCATT	7	0	0	2	0	0	0	0	1	2	2	0	0	0	0	0	0	0	0
miR1445-y	18	TCCGTTGTAGTCTAGAAA	7	0	0	0	0	0	0	0	0	2	0	0	1	0	3	0	0	0	1
miR6214-x	18	CGACGACGACGAGAATGA	7	0	0	0	0	0	1	0	0	0	0	0	0	4	2	0	0	0	0
miR5171-y	18	AAAATGGGACGGAAGGAG	7	0	0	2	0	1	0	0	0	2	2	0	0	0	0	0	0	0	0
miR170-y	21	TGATTGAGCCGTGACAATATC	6	0	0	0	2	1	0	1	0	1	0	0	0	1	0	0	0	0	0
miR1871-y	20	CCTTGGCTCTGATATCATGT	6	0	0	0	0	2	0	0	0	0	0	0	0	0	2	0	2	0	0
miR837-x	18	ATCAGTTTTGTGTTCGTT	6	1	0	0	1	0	0	0	0	0	0	0	0	0	0	0	4	0	0
miR4371-x	22	TTAAGTGATGACGTGGCAGACA	6	0	0	0	0	0	0	0	0	6	0	0	0	0	0	0	0	0	0
miR6471-x	20	TTGCGATCATCAGGACAACC	6	3	0	0	0	2	0	0	0	0	0	0	0	0	0	1	0	0	0
miR4221-x	20	TTGCTCTGTTGAATTCTTGT	6	0	0	0	3	0	0	1	0	0	1	0	1	0	0	0	0	0	0
miR9674-y	21	TGAATTTGTCCATAGCATCAG	6	1	0	0	0	0	0	2	0	0	0	0	0	1	0	0	2	0	0
miR5058-x	18	AGTTGAGGGATGAGAAAT	6	0	0	0	0	0	0	0	0	1	1	0	0	2	0	0	1	1	0
miR1439-y	21	TTTTGGAACAGAGGGAGTATT	6	0	1	0	1	0	0	0	1	0	0	0	0	1	2	0	0	0	0
miR7740-x	18	AACAACCTCTGTCTGATC	6	5	0	0	0	0	0	0	1	0	0	0	0	0	0	0	0	0	0
miR163-y	22	GAAGAGGACTTGGAACTCGATC	6	1	0	0	0	0	0	0	0	1	2	0	0	0	0	0	0	1	1
miR902-y	18	ATGGATCTGGAACATATA	6	0	0	0	0	0	0	0	0	2	2	0	0	2	0	0	0	0	0
miR846-y	21	TTGAATTGACGAGCTTGAATT	6	0	0	0	0	0	0	3	0	1	0	0	0	2	0	0	0	0	0
miR3951-x	18	AAGAGATGAGAGAAAAAT	6	1	0	0	2	0	1	0	0	0	1	0	0	0	0	0	0	0	1
miR8007-y	21	AAAAATGAAAAGTGCGGCATA	6	0	1	0	1	0	0	0	0	0	0	0	0	0	2	1	0	0	1
miR829-y	18	ACTCTGATACTAAATGAT	6	0	0	1	0	0	0	0	0	3	0	0	0	0	0	0	0	2	0
miR1128-x	21	ACTACTCCCTCTGTCCCAAAT	5	0	0	0	0	0	0	0	0	0	1	0	0	0	4	0	0	0	0
miR5227-x	18	TGGAGAAGAAGATTGATG	5	0	0	0	0	1	0	3	0	0	0	0	0	1	0	0	0	0	0
miR8128-y	18	TTTTGTGGGGAGAGAACT	5	0	0	0	0	0	0	0	0	0	0	0	1	4	0	0	0	0	0
miR7783-y	19	GCTCTGATACCATGTAGAA	5	0	1	2	0	0	0	0	0	0	0	0	0	0	0	0	2	0	0
miR5234-y	18	ATTCTGGTGTGGATGGCA	5	0	0	0	2	0	0	0	0	0	0	0	2	0	1	0	0	0	0
miR6281-x	20	AGAGAGAGAGAGAGTGAGAG	5	0	1	0	1	0	0	0	0	0	0	1	0	0	0	0	0	2	0
miR7775-x	18	CTGGTTTATTCTGCAGCA	5	0	0	0	0	0	1	1	0	0	0	1	0	0	1	0	0	1	0
miR6139-y	18	TTTGGAAGGGAAGAAATC	5	0	0	1	1	0	0	0	0	0	3	0	0	0	0	0	0	0	0
miR6196-x	19	GAGGACGAGGGGTTGGAGA	5	0	0	1	0	1	1	0	0	0	0	0	0	0	0	0	0	0	2
miR6279-y	20	CATAGATGAGAATTCCAGAG	5	0	0	0	0	0	0	0	0	1	0	0	3	0	0	0	0	1	0
miR399-z	23	TGCCAAAGGAGAGTTGCCCACTT	5	0	2	0	0	0	0	2	0	0	0	0	0	0	1	0	0	0	0
miR829-x	22	CTTCGTATCTTTGATTTGAACC	5	0	2	0	0	0	0	0	0	0	0	0	3	0	0	0	0	0	0
miR5837-x	18	ATGTTGGAGTTACATGCA	5	0	0	0	0	0	0	0	1	0	0	0	0	0	0	2	1	1	0
miR5769-y	19	GATGATGGAGATGAAGACG	5	0	3	0	0	0	0	0	0	0	0	0	0	1	0	1	0	0	0
miR9670-y	21	AGGTGGAATACTTGAAGAAGA	5	0	0	0	0	0	0	1	0	0	0	0	0	1	0	0	3	0	0
miR8642-y	18	TCAAAACCGGATCGAATT	5	5	0	0	0	0	0	0	0	0	0	0	0	0	0	0	0	0	0
miR8646-x	18	GAGGATGTGAAATTTGGT	5	0	0	0	0	0	0	0	0	0	0	0	0	0	0	0	0	3	2
miR7717-y	21	TGACTGAGAAATCGACTGTCC	5	0	0	0	1	0	0	0	1	0	0	0	0	0	0	3	0	0	0
miR8015-x	18	TTGGAGAATGAAAATGAA	5	0	0	0	0	0	0	0	0	0	0	0	1	1	1	0	2	0	0
miR5200-y	21	TGTAGATACTCCCTAAGGCTT	5	2	0	0	0	0	0	0	0	0	0	0	0	1	0	0	2	0	0
miR8172-x	19	ATGGAGCAGCTAGATGGAG	5	0	0	0	5	0	0	0	0	0	0	0	0	0	0	0	0	0	0
miR5266-x	18	GCCGGGGGACTGACTGGG	5	0	0	0	0	1	0	0	0	0	1	0	0	1	0	0	1	1	0
miR1852-y	21	AAATGGATTCAGAATGTAGGT	5	0	0	2	0	0	0	0	0	1	0	1	0	0	0	0	0	1	0
miR773-x	18	TTTGAACAAATAGTTGAA	5	0	0	3	0	0	0	0	0	0	0	0	2	0	0	0	0	0	0
miR4393-y	20	AAACGGGACAGCAGAGAAGT	4	0	0	0	0	0	0	0	0	0	0	0	4	0	0	0	0	0	0
miR4376-x	21	ACGCAGGATAGATGACGCCGT	4	0	1	0	0	1	0	0	0	1	0	0	0	0	0	0	1	0	0
miR9560-x	21	TGGTGGAACAATTTTGAGTTT	4	1	0	0	1	0	0	0	0	2	0	0	0	0	0	0	0	0	0
miR5183-y	18	ATACTTGGACATATTTGA	4	0	0	0	0	0	0	0	0	0	0	0	0	0	0	0	4	0	0
miR2606-y	21	AAGAACCATTCAAAATACACA	4	2	0	1	0	0	0	0	0	0	0	0	1	0	0	0	0	0	0
miR841-x	18	AGCCACTTGAAACTCAAT	4	0	0	0	0	0	0	2	2	0	0	0	0	0	0	0	0	0	0
miR6286-x	21	AACCATTGGCTAGTAGTTATT	4	0	0	0	0	0	0	0	0	0	0	2	0	0	0	0	0	1	1
miR833-x	18	CTGAACTCGGACCAGTTC	4	0	0	0	0	0	0	0	0	0	0	0	0	3	0	0	0	1	0
miR8786-x	18	GATGGGGCAGAAAGATGC	4	0	0	0	0	0	2	0	0	1	0	0	0	1	0	0	0	0	0
miR1130-y	21	ACTTATATTGTGGGACGGAGG	4	2	0	0	0	0	0	0	0	0	0	0	0	1	0	0	1	0	0
miR835-y	19	AGAAGAAACTCAAGAAAGA	4	0	0	0	3	0	0	0	0	0	0	0	0	0	0	1	0	0	0
miR3704-x	19	CTCGGTGGAGTTGGGCACA	4	0	0	0	1	1	0	0	1	0	0	0	0	1	0	0	0	0	0
miR7711-x	18	ATGATTGAATTTCTAACT	4	0	1	0	0	0	0	0	1	0	1	1	0	0	0	0	0	0	0
miR2592-x	20	TGACAAGTTTGAATTTCCCT	4	0	0	0	0	0	3	0	0	0	0	1	0	0	0	0	0	0	0
miR7539-x	18	TCGAGAGAGAGAGAGACC	4	0	0	0	0	0	0	0	0	0	0	0	1	2	0	1	0	0	0
miR8026-x	18	AATATCTGGCAACCCTAA	4	0	0	0	0	0	1	1	0	0	1	0	0	0	0	0	0	0	1
miR8641-x	18	ATTTGGGACACTGCTGGC	4	0	0	0	0	0	0	0	0	0	1	0	0	2	0	0	0	0	1
miR7838-y	18	CATGGGCTGGGAAGGAGG	4	0	0	0	0	0	0	1	0	0	0	0	0	0	0	2	0	1	0
miR5062-z	23	TGAACCTTGGGGAAAAGCCGCAA	4	1	0	0	0	0	0	1	0	0	0	0	0	0	0	0	2	0	0
miR1037-y	19	GTATGAGGATTTGATGGCT	4	0	0	0	1	0	0	0	0	0	0	3	0	0	0	0	0	0	0
miR6259-y	18	AAAAATACGGGCGAGAGA	4	0	0	0	0	0	1	0	0	0	0	2	0	0	0	1	0	0	0
miR395-x	18	AACTGCAAGCACTTCATG	4	0	0	0	0	0	0	1	0	1	1	0	0	0	0	0	1	0	0
miR437-y	18	CAAGTTAGAGAATTTTGA	4	0	0	2	0	0	0	0	0	0	0	0	0	0	0	0	0	0	2
miR2936-x	18	TGAGAGAGAGGACACAGA	4	0	0	2	0	0	0	0	0	0	0	0	0	0	2	0	0	0	0
miR5049-x	18	CCGACCCGAATTACTTGT	4	0	0	0	0	0	0	0	2	0	0	1	1	0	0	0	0	0	0
miR8681-y	21	TGGCATTGTTGAGGGTCTTAT	4	0	1	2	0	0	0	0	0	0	0	0	0	0	0	0	0	0	1
miR5564-x	21	CAATTCGTCAAACAGCTTGCG	4	0	0	0	4	0	0	0	0	0	0	0	0	0	0	0	0	0	0
miR5208-z	18	AATGGATGGTGTGAGTTT	4	1	0	0	0	0	0	0	0	0	0	1	0	1	0	0	0	1	0
miR5813-y	18	GCAAGGAGGGACTCTGGT	4	0	0	0	3	0	0	1	0	0	0	0	0	0	0	0	0	0	0
miR1520-y	18	GTAATCGGCCAATCAGAA	4	1	1	0	0	0	0	0	0	0	2	0	0	0	0	0	0	0	0
miR8021-x	21	CAAGGCTCGAACTCGTGACCT	4	0	0	0	0	0	2	0	1	0	0	0	1	0	0	0	0	0	0
miR946-y	22	CAGCCCTTCTCCTATCCACAAC	4	0	0	0	0	0	0	0	0	0	0	0	0	4	0	0	0	0	0
miR9773-y	26	ATTGTTTTTATGTTATTTTGTGAAGG	4	1	0	1	0	0	0	1	0	0	0	0	0	0	0	0	1	0	0
miR5825-y	19	ACATCTGAGAGCCTGAAAC	4	0	0	0	0	0	0	0	0	0	0	0	0	2	1	1	0	0	0
miR5225-x	21	CCTGTCGCAGGAGAGATGACG	4	0	0	0	0	0	1	0	0	0	0	0	0	0	0	3	0	0	0
miR5207-x	18	AAGGTGGGTTGGGTTGGG	4	0	0	1	0	1	0	0	0	1	0	0	0	0	0	0	0	1	0
miR4993-x	19	AGGCGGCGGCGGTGGAGGA	4	0	0	0	0	0	0	0	0	0	0	0	0	1	1	1	0	0	1
miR5144-y	18	TGAGGAGCACAAGAAGAA	4	0	0	2	2	0	0	0	0	0	0	0	0	0	0	0	0	0	0
miR472-y	21	TTTCCCAACTCAACCCAACCC	4	0	0	0	0	0	0	1	0	0	0	0	0	0	0	3	0	0	0
miR1870-y	18	GGGCTAGTTCAGAATGAA	4	0	0	0	0	0	0	0	0	2	0	1	0	0	0	1	0	0	0
miR9742-y	21	TTTGATTTGTTTGTTTTGTAG	4	0	0	0	1	0	0	0	0	0	0	3	0	0	0	0	0	0	0
miR479-y	22	ATGAGCCGCGCCAATATCACTC	4	0	1	0	0	0	0	2	0	0	0	0	0	1	0	0	0	0	0
miR5185-x	22	TTCTAAGTCAAACTCTAAATCT	4	0	0	0	0	0	0	0	0	0	2	0	0	0	0	0	0	0	2
miR1535-z	18	TTGATTGTGGTGATGGCT	4	0	0	0	0	0	0	0	1	1	0	0	0	2	0	0	0	0	0
miR1134-z	18	AACAGCAACAAGAAGAAC	4	0	2	0	0	0	0	1	0	0	0	0	0	0	0	0	0	1	0
miR5185-y	18	GGAGGTTGGCTTAGAAGC	4	0	0	0	0	0	0	1	3	0	0	0	0	0	0	0	0	0	0
miR536-y	19	CCGTGCCACGCTGTGTGCA	3	3	0	0	0	0	0	0	0	0	0	0	0	0	0	0	0	0	0
miR7503-x	19	ATGGCGGAACAGGTTAGAT	3	0	0	0	0	0	0	0	0	0	0	0	0	0	0	3	0	0	0
miR3445-x	18	ACCGAACCATCACTTTCC	3	0	0	0	0	0	0	0	0	1	2	0	0	0	0	0	0	0	0
miR7732-y	19	AGATCGAGATCGTTGAAGA	3	0	0	0	1	0	0	0	0	0	0	0	0	0	0	0	2	0	0
miR836-y	18	CCTGTTTTTCCTTTGAAG	3	1	0	0	0	0	0	0	0	2	0	0	0	0	0	0	0	0	0
miR5169-x	24	TTTTGACCAATTTTGTAGAACAGT	3	0	0	1	0	0	0	1	0	0	0	0	0	1	0	0	0	0	0
miR7756-y	18	AATGGATATGTTGGCATT	3	0	0	0	0	0	0	1	0	0	0	0	0	0	0	0	0	2	0
miR5558-y	19	AAGAATTAGAATTAGAAAA	3	0	0	0	0	0	0	0	0	0	0	2	0	0	1	0	0	0	0
miR5525-x	18	ACCTTGGGAGCAATCTGA	3	0	0	0	0	0	0	0	0	0	0	0	0	3	0	0	0	0	0
miR1135-y	24	CGAGACAAGTAATTCCGAACGGAG	3	0	0	0	0	0	0	1	0	0	0	0	0	1	0	0	1	0	0
miR6446-y	18	GGGCTGGGTCCTGATGAT	3	0	0	0	0	0	0	0	0	0	0	0	0	0	0	0	3	0	0
miR6181-x	20	GATGCTCTTCATGGAGTGGG	3	0	0	0	1	0	0	0	0	0	0	0	1	0	0	0	0	0	1
miR8634-x	18	ATGGAGGATGGAGAAGAT	3	1	0	0	0	0	0	0	0	0	0	0	0	1	0	0	0	1	0
miR4351-x	18	AAGTGGGATTCTGTTGGA	3	2	0	0	0	0	0	0	0	0	0	0	0	0	0	0	0	0	1
miR399-x	21	AGGGCGTTTCTCCTTTGGCAC	3	0	0	1	0	0	1	1	0	0	0	0	0	0	0	0	0	0	0
miR6201-x	22	TGACCCTGAGGCACTCATACCG	3	1	0	0	0	0	0	0	0	0	0	0	0	2	0	0	0	0	0
miR2868-x	19	CCTTGGTTTTATGTAGAAG	3	0	0	0	0	0	0	0	0	2	0	0	0	0	0	0	0	0	1
miR5377-y	18	CTGAAGGGTCGTTGTAGA	3	0	0	1	0	0	2	0	0	0	0	0	0	0	0	0	0	0	0
miR5174-x	20	ACTCCCTCTGTTCCATTAAT	3	0	0	0	0	0	1	0	0	0	2	0	0	0	0	0	0	0	0
miR8606-x	18	ACCGATCCGTTTTTTTTA	3	0	0	0	0	1	0	1	0	0	0	1	0	0	0	0	0	0	0
miR5041-y	21	TGAGGAAGTTGCAGATGAATG	3	0	0	0	0	0	0	0	0	0	1	0	2	0	0	0	0	0	0
miR952-x	20	CTGAGAATGACATTGATGGA	3	0	0	0	0	0	0	0	0	3	0	0	0	0	0	0	0	0	0
miR8000-x	19	AAGAACCGTCACCGAAGAA	3	0	0	0	0	0	1	0	1	0	0	0	1	0	0	0	0	0	0
miR3948-x	19	AGTGGGAGTGGGAGAAGTG	3	2	0	0	0	0	0	0	0	0	0	0	1	0	0	0	0	0	0
miR9678-y	18	ATCTGGCGAGGGACATGC	3	0	0	0	0	1	2	0	0	0	0	0	0	0	0	0	0	0	0
miR1510-y	20	CGGAGAATTAGGTAAAAGAA	3	0	0	0	0	0	0	0	0	1	2	0	0	0	0	0	0	0	0
miR1859-y	20	TCTTTCCTATGCCTTCCATT	3	2	0	0	0	1	0	0	0	0	0	0	0	0	0	0	0	0	0
miR7507-x	18	GAAGTAGACACTTGGGGT	3	0	3	0	0	0	0	0	0	0	0	0	0	0	0	0	0	0	0
miR7765-y	18	AAAAGAAGTTGGACGAAA	3	0	0	0	1	0	0	0	0	0	0	0	0	0	0	0	2	0	0
miR8691-x	20	TTAGATGATGACACAGGAAA	3	0	0	1	0	0	0	0	0	0	0	1	0	0	0	0	0	1	0
miR838-x	20	CCAAGAATGAGAAGCAAACC	3	0	0	0	0	0	0	0	0	0	0	0	0	0	0	0	0	0	3
miR5340-y	18	GGCATGGATGAATTTCAA	3	0	1	0	0	0	2	0	0	0	0	0	0	0	0	0	0	0	0
miR8050-x	18	AGGAACCAATGTCAATGA	3	3	0	0	0	0	0	0	0	0	0	0	0	0	0	0	0	0	0
miR5239-x	18	GGGAGAAAAGATTGGATG	3	0	1	0	0	0	0	0	0	0	1	0	0	0	1	0	0	0	0
miR826-x	21	TCTGGTTTTGGACGCGTGAGA	3	0	0	0	0	0	0	0	0	0	0	0	0	2	0	0	1	0	0
miR7725-y	18	TTCAAAAAAGAGGAGACG	3	0	2	1	0	0	0	0	0	0	0	0	0	0	0	0	0	0	0
miR5163-x	18	AATTGAATTATTTAAAAA	3	0	0	0	1	0	0	0	0	0	0	0	0	1	0	0	1	0	0
miR3630-x	18	AGCAAGTGACGATAGACA	3	0	0	0	0	0	0	0	0	0	0	0	0	0	1	0	2	0	0
miR7723-y	18	TGAAGGAAGTGGTTTCAA	3	0	1	0	0	0	0	0	0	0	0	0	0	2	0	0	0	0	0
miR2665-x	18	CATTTCAGGGCAAGAATT	3	1	0	0	0	0	0	2	0	0	0	0	0	0	0	0	0	0	0
miR852-x	20	TCAAAACAAAGGGGCTTATC	3	0	0	0	3	0	0	0	0	0	0	0	0	0	0	0	0	0	0
miR414-y	18	GTCCTCCTCATCTTCCTC	3	0	0	0	2	0	0	0	0	0	0	0	0	0	0	1	0	0	0
miR6034-y	23	ATCAGATGTATTTAGCTTTGGGG	3	0	0	0	0	0	0	0	0	0	0	0	1	0	2	0	0	0	0
miR8043-y	18	ATATTAGTGGACTTTGGC	3	0	0	0	0	3	0	0	0	0	0	0	0	0	0	0	0	0	0
miR7996-x	18	GAACATGTGAAATTTGAA	3	2	0	0	0	0	1	0	0	0	0	0	0	0	0	0	0	0	0
miR6253-x	18	AAGTTGGCAGTTGAGTTA	3	0	0	0	0	0	1	0	0	0	0	0	1	1	0	0	0	0	0
miR6154-y	19	GGTGGATCTCGTGGAGAAA	3	0	0	0	0	1	1	1	0	0	0	0	0	0	0	0	0	0	0
miR8039-x	18	CCTATCCGAACCATCACC	3	1	0	0	0	0	0	0	0	1	1	0	0	0	0	0	0	0	0
miR6266-x	21	AATGGAGGGGCAAAATGATAA	3	0	0	0	0	0	0	1	2	0	0	0	0	0	0	0	0	0	0
miR396-z	21	ATTCTTGAACTTCTTATGCAG	3	0	0	1	0	0	0	0	0	0	1	0	0	0	0	0	0	1	0
miR9563-y	19	AAAATTAAGAGATGTATTA	3	0	0	0	0	0	0	0	0	0	0	2	0	0	0	0	1	0	0
miR5655-x	19	AGAGACATAAGAAGAAGAA	3	0	0	0	0	0	0	0	0	0	0	1	0	0	0	2	0	0	0
miR1057-y	18	TATTCTGGTGTCCTAGCT	3	0	0	0	0	0	2	0	0	0	0	0	0	0	1	0	0	0	0
miR9563-x	18	CCCGTCGCGTAATTTTTA	3	0	0	0	0	0	0	0	0	0	0	0	0	0	0	0	0	0	3
miR1137-x	21	CTCCGTTCCAGAATAGATGAC	3	0	0	0	0	0	0	1	0	0	0	0	0	1	0	0	1	0	0
miR3476-x	19	ACTGGATTAGTTGACAACT	3	0	0	0	0	0	0	0	0	0	0	0	0	0	0	2	0	1	0
miR6261-y	18	AAGTGATTGTATGCAGAA	3	0	0	0	2	0	0	0	0	0	0	0	0	0	0	0	0	1	0
miR5575-y	18	GATTTTGAAGGTTTCGGA	3	3	0	0	0	0	0	0	0	0	0	0	0	0	0	0	0	0	0
miR6182-x	18	ATTTTGTGATGGATGGCT	3	0	0	0	0	0	0	0	0	2	0	1	0	0	0	0	0	0	0
miR1432-x	21	ATCAGGAGAGATGACACCGAC	3	0	0	0	0	0	0	0	0	0	0	0	0	1	0	0	1	0	1
miR5016-y	18	GTGGATACCTTGAAAATT	3	0	0	0	0	0	0	3	0	0	0	0	0	0	0	0	0	0	0
miR8609-x	18	CCGTGTACCTAATCTTAA	3	0	0	0	0	0	0	0	0	0	0	0	0	0	0	0	0	0	3
miR5640-x	19	GAGAGGAGGAATTAGGTTC	3	0	0	0	0	0	0	0	0	0	1	0	1	0	0	0	0	0	1
miR856-x	21	AATTCCACCAATGATTTCAGC	3	0	1	0	0	1	0	0	0	0	0	0	0	0	1	0	0	0	0
miR6230-x	18	TCTCTGGGTCCCTAAACT	3	0	0	0	0	0	0	0	0	0	0	0	0	0	3	0	0	0	0
miR902-x	18	CTGTAGATTCTTCATTTG	3	0	0	0	0	0	0	0	0	0	0	0	0	0	0	0	0	0	3
miR8748-y	19	GGTGGAGATGGATCAAAGG	3	0	0	0	0	0	0	0	0	0	0	0	3	0	0	0	0	0	0
miR4391-y	18	AAGAAGGAAGAAGAAGAA	3	2	0	1	0	0	0	0	0	0	0	0	0	0	0	0	0	0	0
miR447-y	20	TTATGGAAGAAATTGAAGAA	3	0	0	0	0	0	3	0	0	0	0	0	0	0	0	0	0	0	0
miR9660-x	19	CACGAGCAACGGATGAATC	3	0	0	0	0	0	0	1	0	0	2	0	0	0	0	0	0	0	0
miR1869-x	18	GAACAATAGGCAAGGGAA	3	0	0	0	0	0	1	0	0	0	0	0	0	0	1	1	0	0	0
miR8006-x	18	TTGAACGAAAGGGGCACC	3	1	0	0	0	0	0	1	0	0	0	0	0	0	0	0	0	0	1
miR1444-x	19	AACCTTGATCGAATGTGAA	3	0	0	0	0	0	0	0	0	0	0	0	0	2	1	0	0	0	0
miR9675-y	21	TTTATGATCACTCTCGTTTTG	3	0	0	0	0	0	0	0	0	0	0	0	0	1	0	0	2	0	0
miR6113-x	22	CCTGTGAAACTCAAGAACACCT	3	0	0	2	0	0	0	0	0	0	0	1	0	0	0	0	0	0	0
miR9732-y	18	AAGGGTATGAAGTGGAAT	3	0	0	0	0	0	0	0	0	0	3	0	0	0	0	0	0	0	0
miR8638-x	19	GGAATACAGGAAGGGCTCT	3	0	0	0	0	3	0	0	0	0	0	0	0	0	0	0	0	0	0
miR2275-y	22	TTGGTTTCCTGCAATTTCTCAT	3	0	0	0	0	0	0	0	1	0	0	2	0	0	0	0	0	0	0
miR3446-y	18	CCCTTTTAACTTCCGAAT	3	0	0	0	0	0	0	0	0	0	0	0	0	0	0	3	0	0	0
miR1117-x	24	ATAGTACCGGTTCGTGGCACGAAC	3	0	0	0	0	0	0	2	0	0	0	0	0	1	0	0	0	0	0
miR5303-y	23	ATTTTGTAGAATCTGACACGGGT	3	0	0	1	0	0	0	1	0	0	0	0	0	0	0	0	1	0	0
miR9477-x	21	CCGTTGTTTCCTTTTCCTCCC	3	0	0	0	0	0	0	0	0	0	0	0	3	0	0	0	0	0	0
miR7533-y	18	GAAAGGATGGAGAGAAGC	3	0	0	0	0	0	0	2	0	0	0	0	0	0	0	0	0	0	1
miR5271-x	18	AATTGTGGTCACTAACGA	3	0	0	0	0	0	1	0	0	0	0	0	0	2	0	0	0	0	0
miR3633-x	19	ATGGATGGTTTGAAGAGAA	3	0	0	1	0	0	0	0	0	2	0	0	0	0	0	0	0	0	0
miR8650-y	18	GGAAGGAAAAAAGGCAAT	3	0	0	0	0	1	0	0	0	0	1	0	0	0	0	0	0	1	0
miR8165-y	18	AATGGAGGCACTTGTGAA	3	0	0	0	3	0	0	0	0	0	0	0	0	0	0	0	0	0	0
miR2657-y	19	TTTCATCGTTTCTGTTGTT	2	0	0	2	0	0	0	0	0	0	0	0	0	0	0	0	0	0	0
miR9749-y	21	TTAGCTTCTTTGACCTTTCCT	2	0	0	0	0	0	0	0	0	0	0	0	0	0	0	2	0	0	0
miR8594-x	19	ATGAATATGTTAAGAAAAT	2	2	0	0	0	0	0	0	0	0	0	0	0	0	0	0	0	0	0
miR1436-y	20	AACATTATGGGACGGAGGGA	2	0	0	0	0	0	0	0	0	0	0	0	0	0	0	0	2	0	0
miR5175-y	19	ATTTGGGAACGGAGAGAAT	2	0	0	0	0	0	0	0	0	0	0	0	0	0	0	1	1	0	0
miR4383-y	18	GATCTCAGTGGAACCGGA	2	0	0	0	0	1	0	0	0	0	0	0	0	0	0	0	0	1	0
miR3447-y	21	TGTTTGGGTGTGTTTGTTATG	2	0	0	0	0	0	0	0	0	0	0	0	0	0	1	0	1	0	0
miR7724-y	20	ATGGCCCACATTGACATTTT	2	0	0	0	0	0	0	0	0	0	0	0	0	0	0	0	0	1	1
miR3510-x	18	TTGATACCATCTTGCGAC	2	0	0	2	0	0	0	0	0	0	0	0	0	0	0	0	0	0	0
miR4224-y	18	ACGACTGAGCTTGCTCAT	2	0	0	1	1	0	0	0	0	0	0	0	0	0	0	0	0	0	0
miR7484-y	22	TTGATGTAATGGATGGAGACTA	2	0	0	0	2	0	0	0	0	0	0	0	0	0	0	0	0	0	0
miR8137-x	18	CGCAGGCCATTCACAAAA	2	0	0	0	0	0	0	0	0	0	0	0	0	2	0	0	0	0	0
miR9661-x	18	GATGAAGGAGAGCAGTGA	2	0	0	0	0	0	0	0	0	0	0	0	0	2	0	0	0	0	0
miR2090-x	20	TAACTCTGATTTTCGAATTT	2	0	0	0	0	0	0	2	0	0	0	0	0	0	0	0	0	0	0
miR4398-y	18	TCAGCGGAGAAAGAAGAC	2	0	0	0	0	1	0	0	0	0	0	0	0	0	0	0	0	0	1
miR5667-y	18	AAAATGATCTAAATGGAT	2	0	0	2	0	0	0	0	0	0	0	0	0	0	0	0	0	0	0
miR2108-x	19	TTTGTGTGTTGTGTTTGTG	2	0	0	0	0	0	0	0	0	0	2	0	0	0	0	0	0	0	0
miR9782-y	19	ATATTAGGTTGGTCAAACT	2	0	0	0	0	0	0	2	0	0	0	0	0	0	0	0	0	0	0
miR5269-y	19	TGAAGGGACATACATTGAT	2	0	0	0	0	0	0	0	0	0	0	0	2	0	0	0	0	0	0
miR9724-x	20	GAGATAGAGTCAAAATCGAA	2	0	0	0	0	0	0	0	0	0	0	0	2	0	0	0	0	0	0
miR5568-x	18	ATGTTTTGGGTTCTGTAG	2	0	0	1	1	0	0	0	0	0	0	0	0	0	0	0	0	0	0
miR4226-x	18	AGATGAATTCTAGCAATA	2	0	0	0	0	0	0	0	0	0	0	0	0	0	0	0	1	0	1
miR9557-y	18	GGCTGACTTGGAACCCAA	2	0	0	0	0	0	0	2	0	0	0	0	0	0	0	0	0	0	0
miR5273-y	18	TGTAGGTTGAGAAGAGAG	2	2	0	0	0	0	0	0	0	0	0	0	0	0	0	0	0	0	0
miR8775-x	21	TTTTGAGATTGAAGCTGAAGG	2	0	0	2	0	0	0	0	0	0	0	0	0	0	0	0	0	0	0
miR7724-x	20	ATGTGAATGCTGGCCAACCC	2	0	1	0	0	1	0	0	0	0	0	0	0	0	0	0	0	0	0
miR9657-x	21	TTCGCCGGAGAAGCATGCTGC	2	0	0	0	0	0	0	1	0	0	0	0	0	0	0	0	1	0	0
miR5519-x	19	TTGGCAGAAGTACAGAACT	2	0	0	0	0	0	0	0	0	0	0	2	0	0	0	0	0	0	0
miR8730-x	18	AGAGATGGGGATTTGGGA	2	0	0	2	0	0	0	0	0	0	0	0	0	0	0	0	0	0	0
miR5062-x	23	ACAACCTTAGGGAACAGCCGCAT	2	1	0	0	0	0	0	0	0	0	0	0	0	0	0	0	1	0	0
miR4407-y	18	CAGAGGAAGCAGAAGTTG	2	0	0	2	0	0	0	0	0	0	0	0	0	0	0	0	0	0	0
miR3437-y	19	ATCGGTGGATGTTGCTTTT	2	0	0	1	0	0	0	0	0	1	0	0	0	0	0	0	0	0	0
miR5019-y	18	TGTGGGCAAAGAAAAACT	2	0	0	0	0	0	0	0	0	1	0	0	0	0	0	1	0	0	0
miR8787-y	18	TTTAATTGGAAGAGAGAA	2	0	0	0	0	0	0	2	0	0	0	0	0	0	0	0	0	0	0
miR5577-y	20	AGCTGAGACTCATTTTTTTT	2	0	0	0	0	0	0	0	0	0	2	0	0	0	0	0	0	0	0
miR8685-y	19	CACGACACTCCAAAGATTT	2	0	0	0	0	0	0	0	0	0	0	2	0	0	0	0	0	0	0
miR8776-y	18	AATTTCAAAGTCCTTATA	2	0	0	0	0	0	0	0	0	0	0	0	0	0	2	0	0	0	0
miR8751-x	18	ACTTGTAGAGAGATAAAG	2	0	0	0	0	0	0	0	0	0	0	0	1	0	0	0	1	0	0
miR2096-y	18	GAGGGGAAATTGGTGGGA	2	0	0	0	1	0	0	0	0	0	0	0	0	1	0	0	0	0	0
miR1531-y	19	CTGCGTCGATATGGGAAGA	2	0	1	0	1	0	0	0	0	0	0	0	0	0	0	0	0	0	0
miR1846-y	19	TCACCCCGGGCTGCTCGCT	2	0	0	0	0	0	0	2	0	0	0	0	0	0	0	0	0	0	0
miR4402-y	18	ACATATTATGGGTCGAAG	2	0	0	0	0	0	0	0	0	0	0	0	0	0	0	0	0	0	2
miR2086-y	19	CATGACTGTAGAACTGGAA	2	0	0	0	0	0	0	0	0	1	0	0	1	0	0	0	0	0	0
miR1535-y	18	TCTTGTTTTTGGTGGTGT	2	0	0	0	0	0	0	0	0	2	0	0	0	0	0	0	0	0	0
miR2873-y	21	TTGGAGTTGATATTTGGTATG	2	0	0	0	0	0	0	0	0	1	0	0	1	0	0	0	0	0	0
miR5300-x	18	CAGGGCAGGCATTCCAAC	2	0	0	0	0	1	0	1	0	0	0	0	0	0	0	0	0	0	0
miR5162-x	21	CCAAATGACTAAACTACCCCT	2	0	2	0	0	0	0	0	0	0	0	0	0	0	0	0	0	0	0
miR7720-y	21	CACATGATGTGGCTTGGACCT	2	0	0	0	0	0	0	0	2	0	0	0	0	0	0	0	0	0	0
miR4414-y	18	ATGATGCTGGAGCTGAAT	2	0	0	0	0	0	0	0	0	0	0	0	0	0	0	1	1	0	0
miR7504-y	18	AAATTCATGATGTGGCAT	2	1	0	0	0	0	0	0	0	1	0	0	0	0	0	0	0	0	0
miR838-y	20	TCTTCTAGTTCTTCCACAAC	2	0	0	0	0	0	0	0	0	0	0	0	0	0	2	0	0	0	0
miR2098-x	18	CGTGGAGGTTGCCGATGA	2	0	0	0	0	0	0	0	0	0	0	0	0	2	0	0	0	0	0
miR3982-x	19	CACCACGTAGGCAACAATG	2	0	0	0	0	0	2	0	0	0	0	0	0	0	0	0	0	0	0
miR7769-y	18	CATGTTGGCACTGCTGGT	2	0	0	0	1	0	0	0	0	0	0	0	0	0	0	1	0	0	0
miR5237-y	18	ATTTCCAAAGATTTATTT	2	0	0	0	0	0	0	0	0	0	0	0	0	0	0	0	0	2	0
miR413-x	20	TTAGTTTCTCTTGTTCTGAA	2	0	1	0	0	1	0	0	0	0	0	0	0	0	0	0	0	0	0
miR3437-x	18	GACAAGGATCTACGGATT	2	0	0	0	0	0	0	0	0	0	0	2	0	0	0	0	0	0	0
miR5242-y	18	AATTGTAGAATCAAGCCA	2	0	0	0	0	0	0	0	2	0	0	0	0	0	0	0	0	0	0
miR781-y	19	TTTCCAAAAAACTCTAATT	2	0	0	0	0	0	0	1	0	1	0	0	0	0	0	0	0	0	0
miR6430-x	18	TTGATGAGAAATTGACTG	2	0	0	0	0	0	0	0	2	0	0	0	0	0	0	0	0	0	0
miR6205-y	21	TAGGACGTTTGGATACCTTTT	2	0	0	0	2	0	0	0	0	0	0	0	0	0	0	0	0	0	0
miR7692-y	19	TGACTTGGCATGCTCACTT	2	0	0	0	0	0	0	0	0	0	0	0	0	0	0	0	0	0	2
miR5715-x	18	GTGAGATGCCTCTGAAGA	2	0	0	0	0	0	0	0	0	0	0	0	0	0	0	0	2	0	0
miR5140-y	20	GCTGGTGAATATTTGGAGGA	2	0	0	2	0	0	0	0	0	0	0	0	0	0	0	0	0	0	0
miR5200-x	21	AAGCCTTAGTGAATATCTACA	2	0	0	0	1	0	0	0	0	0	0	0	0	0	0	0	1	0	0
miR9863-x	21	AGTTATGATCTGCTTCTCATC	2	1	0	0	0	0	0	0	0	0	0	0	0	0	0	0	1	0	0
miR5671-x	22	ATGGAAGTGAATCGGGTTACTC	2	0	0	0	0	0	0	1	0	0	0	0	0	0	0	1	0	0	0
miR5808-x	18	CATTTCTGATCGTTCGAT	2	0	0	0	0	0	0	0	0	0	0	0	2	0	0	0	0	0	0
miR8554-x	18	AGTTTGGATTTTGAGGAT	2	0	0	0	0	0	0	0	0	0	0	0	1	1	0	0	0	0	0
miR1521-x	19	TTAACGGACAATGTTGACT	2	0	0	0	0	0	0	0	0	0	0	0	2	0	0	0	0	0	0
miR1051-x	18	CAATAGAACAGGAAGAGG	2	0	0	1	0	0	0	0	0	0	0	0	0	0	0	0	0	1	0
miR1043-y	18	TTGTGGGTGAATTTGAAG	2	0	0	0	0	0	0	0	0	0	0	0	0	0	0	0	0	2	0
miR6228-y	19	CTGTGGCAATAGAATCAAT	2	0	0	0	2	0	0	0	0	0	0	0	0	0	0	0	0	0	0
miR6180-x	18	AGGGAGGAAGGAAGAGGG	2	0	0	0	0	0	1	0	0	0	0	0	0	0	0	1	0	0	0
miR8553-y	18	GTATTTTGGATCACCTGG	2	0	0	0	0	0	0	0	0	0	0	2	0	0	0	0	0	0	0
miR9752-x	18	CTTCCTCTTTTCCTTGTT	2	0	0	0	2	0	0	0	0	0	0	0	0	0	0	0	0	0	0
miR8034-x	18	ACAATCACTCCAAAAACT	2	0	1	0	0	0	0	0	0	0	0	0	0	0	0	0	0	0	1
miR1052-y	18	CCTTTTATTGGTGGTGGT	2	0	0	0	0	0	0	0	0	0	0	0	0	2	0	0	0	0	0
miR7743-y	21	AAATTTTGGATTGGATCTTTT	2	0	1	0	1	0	0	0	0	0	0	0	0	0	0	0	0	0	0
miR8763-x	18	AGTTAAATTTGTTGGAGT	2	0	0	2	0	0	0	0	0	0	0	0	0	0	0	0	0	0	0
miR8149-x	18	AGGGGAAGCCTGTAGACT	2	0	2	0	0	0	0	0	0	0	0	0	0	0	0	0	0	0	0
miR6138-x	18	GTTTGGATGGAAGGAAAG	2	0	0	0	1	0	0	0	0	0	0	1	0	0	0	0	0	0	0
miR1868-x	19	CGGAAAACGAGGGAGGAAC	2	0	0	0	0	2	0	0	0	0	0	0	0	0	0	0	0	0	0
miR7729-x	21	TTTCATAGGCAATGTAGAACT	2	0	0	0	0	0	0	0	0	0	0	2	0	0	0	0	0	0	0
miR7814-x	18	ATATTGTTTTTATACTTT	2	0	0	0	0	2	0	0	0	0	0	0	0	0	0	0	0	0	0
miR6466-x	19	CTGGAATGAGGATTTGATG	2	0	0	0	0	0	0	1	0	0	0	0	0	0	0	0	0	0	1
miR8653-x	18	TGAATCTACGTGTGGAAA	2	0	0	0	0	0	0	0	0	0	0	0	0	0	2	0	0	0	0
miR5780-x	18	TTTGAGATTCTGATAAAC	2	0	0	0	0	0	0	0	0	0	1	0	0	0	1	0	0	0	0
miR1088-x	18	GACAGAAGAAAGAGAGCA	2	0	0	0	0	0	0	0	1	0	0	0	1	0	0	0	0	0	0
miR860-y	18	AATAGATTGGACCTTATA	2	0	1	0	0	0	0	0	0	0	0	1	0	0	0	0	0	0	0
miR6141-x	18	ACTCAATCTGGCCTGAAG	2	0	0	0	0	0	0	0	0	0	0	0	0	0	0	0	0	2	0
miR8741-x	18	CACTGTATATGATGATGG	2	0	0	0	0	0	1	0	0	0	0	0	0	0	0	0	0	0	1
miR5749-x	19	TCGGGTTGAGAATTTTTTC	2	0	0	0	0	0	0	0	0	0	0	0	0	2	0	0	0	0	0
miR7765-x	18	TTTTAGGCCAAGAAGTTG	2	0	0	2	0	0	0	0	0	0	0	0	0	0	0	0	0	0	0
miR5561-x	21	TTCAGAGAGACATAGACAAAT	2	0	0	0	0	0	0	0	0	2	0	0	0	0	0	0	0	0	0
miR9763-x	18	AAGCCCAACCAACTCTGA	2	0	0	0	0	0	0	0	0	0	0	0	0	2	0	0	0	0	0
miR2590-y	18	AAGCTGAGTATTGTGCCA	2	0	0	0	0	1	0	0	0	0	0	0	0	0	0	0	0	0	1
miR5755-x	18	CTTTTACGCGAGAAAGAC	2	0	0	0	0	0	0	0	0	0	0	0	0	0	2	0	0	0	0
miR5834-x	18	ATGTGGAAATTGGTGATG	2	0	0	2	0	0	0	0	0	0	0	0	0	0	0	0	0	0	0
miR2623-x	19	TTCGGCGGTACTCTCCTTC	2	0	0	0	0	0	0	0	0	0	2	0	0	0	0	0	0	0	0
miR5292-y	19	GATGATAGAAACAAAGAGA	2	0	0	0	0	0	0	0	0	0	0	0	0	0	0	0	0	0	2
miR5284-y	18	AAAACTGGAAGAATCAGA	2	0	0	0	0	0	0	0	0	2	0	0	0	0	0	0	0	0	0
miR8051-x	18	GTATGGTAGAAAGGTTCA	2	0	0	0	0	0	0	0	0	1	0	0	0	0	0	0	0	0	1
miR7993-x	21	AAGAGAACCACATAAAATATG	2	0	2	0	0	0	0	0	0	0	0	0	0	0	0	0	0	0	0
miR7521-x	18	CTTCATGGGTGGCGTCTT	2	0	0	0	1	0	0	0	0	0	0	0	0	0	0	0	1	0	0
miR3639-y	19	GCTTTCGGCTTCTGAGAAG	2	0	0	0	0	2	0	0	0	0	0	0	0	0	0	0	0	0	0
miR3703-x	19	AGTAGACTCCATCAACCTT	2	0	0	0	0	0	0	0	0	0	0	2	0	0	0	0	0	0	0
miR5291-y	20	ATGGAAGGTTTGGATGGATT	2	0	0	0	1	0	0	1	0	0	0	0	0	0	0	0	0	0	0
miR5138-x	18	AAAAAAATCGGTAGGAGC	2	0	1	0	0	0	0	0	0	0	0	0	1	0	0	0	0	0	0
miR6273-y	19	AATGGAGCCTGATTTTTTT	2	0	0	0	0	0	0	0	0	0	0	0	0	0	0	0	0	0	2
miR5064-y	21	AGAATTTGTCCATAGCATCAG	2	0	0	0	0	0	0	2	0	0	0	0	0	0	0	0	0	0	0
miR1446-x	18	TTTCTGAACTTTCTCTCT	2	0	0	0	0	0	0	0	0	0	0	0	0	0	2	0	0	0	0
miR5079-x	19	TTGGATATGCTATTTTGGT	2	0	2	0	0	0	0	0	0	0	0	0	0	0	0	0	0	0	0
miR9778-x	23	TCCATCATCTCGAACTCGTCGGT	2	0	0	0	0	0	0	1	0	0	0	0	0	1	0	0	0	0	0
miR5756-x	18	ACCGGATTCTCAGACAAG	2	0	0	0	0	0	0	0	0	0	0	1	0	1	0	0	0	0	0
miR7755-x	20	AATTCCACACTGTATTTTGA	2	0	2	0	0	0	0	0	0	0	0	0	0	0	0	0	0	0	0
miR8707-y	19	ACAAACTTTTGAATAATTT	2	0	0	0	0	0	0	0	0	0	1	0	1	0	0	0	0	0	0
miR1136-x	24	TCTTGTCGCAGGTATGGATGTATC	2	0	0	0	0	0	0	1	0	0	0	0	0	0	0	0	1	0	0
miR7485-x	20	AAATACATCATTGAATTCTT	2	0	1	1	0	0	0	0	0	0	0	0	0	0	0	0	0	0	0
miR866-x	21	TTTCAAGGAACAGATTTTATT	2	0	0	0	0	0	0	0	0	0	0	0	0	2	0	0	0	0	0
miR7729-y	18	TGGTGGAGGTTTTGAGGA	2	0	1	0	0	0	0	0	1	0	0	0	0	0	0	0	0	0	0
miR1220-y	18	GTACGGTGGTGAGGAAGA	2	0	0	0	0	0	0	0	0	0	0	0	0	0	0	2	0	0	0
miR5805-x	18	AGTGATGGCGGTGGATAC	2	0	0	0	0	0	0	1	0	1	0	0	0	0	0	0	0	0	0
miR8706-x	19	GTGTTAGGATTGATTTGGT	2	0	0	0	0	0	0	0	0	0	2	0	0	0	0	0	0	0	0
miR8639-y	18	AAGCAGAATTCAACAAGT	2	0	0	0	1	0	0	0	0	0	0	0	1	0	0	0	0	0	0
miR1078-x	18	TGATTGTTTCAATTGAGA	2	0	2	0	0	0	0	0	0	0	0	0	0	0	0	0	0	0	0
miR7484-x	18	GAACTCGAATGGCATTTT	2	0	0	0	0	0	0	0	0	0	0	1	0	0	0	1	0	0	0
miR6265-x	19	CCTTGAACCTTGACCCCAT	2	0	0	0	0	0	0	0	0	0	2	0	0	0	0	0	0	0	0
miR7782-x	19	ACATGGTATCAGAGCAAGT	2	2	0	0	0	0	0	0	0	0	0	0	0	0	0	0	0	0	0
miR1023-y	18	AATTGGAGAGACTGCACT	2	0	1	0	0	0	0	0	0	0	0	0	0	0	0	1	0	0	0
miR8006-y	19	CCTGCCGTCCAAAAAAAAA	2	0	0	0	0	0	0	0	0	0	0	0	0	1	1	0	0	0	0
miR1076-y	21	TCCAAGGACTTATCGGACCCT	2	0	0	0	0	0	0	0	0	2	0	0	0	0	0	0	0	0	0
miR9774-y	21	CAAGATATTGGGTATTTCTGT	2	0	0	0	0	0	1	0	0	0	0	0	0	0	0	0	1	0	0
miR5760-x	20	TTCAGGATATTTGTTATGGA	2	0	0	0	0	0	0	0	0	0	0	0	0	0	0	0	2	0	0
miR1886-x	18	GTGGCATGAAATCTTTGA	2	0	0	0	0	0	0	1	0	0	0	0	0	0	0	0	1	0	0
miR8565-x	18	AATTTGGCAGAGGTCTCT	2	0	0	2	0	0	0	0	0	0	0	0	0	0	0	0	0	0	0
miR2927-x	18	GTCAATGGGGCCCATGAA	2	0	0	0	0	0	0	0	0	0	0	0	0	0	0	0	2	0	0
miR7822-x	18	CTGAATTTGAACAAATGG	2	0	0	0	0	0	0	0	0	2	0	0	0	0	0	0	0	0	0
miR8596-y	18	ATTTCAAGCTGTAAATAT	2	0	0	0	1	0	0	0	0	0	0	0	0	1	0	0	0	0	0
miR398-z	22	TGTGTTCTCAGGTCGCCCCTCT	2	0	0	0	0	0	0	0	0	0	0	2	0	0	0	0	0	0	0
miR7731-y	18	ATAGTTTTGCACTGGACT	2	0	0	0	0	0	0	0	1	0	0	0	0	1	0	0	0	0	0
miR7786-y	18	CACCAACTGTGGAGAAGT	2	0	0	0	0	0	1	0	0	1	0	0	0	0	0	0	0	0	0
miR6197-x	19	GAAAACAAATGGAGGACGT	2	0	0	0	0	0	0	0	0	0	0	0	0	0	0	2	0	0	0
miR5631-y	18	CACGAAAGACATAACTTT	2	0	0	0	0	0	0	0	0	0	0	0	0	0	0	0	2	0	0
miR8693-y	21	AGGATGAAGATATTGATGAAG	2	0	0	0	0	0	0	0	0	0	2	0	0	0	0	0	0	0	0
miR8699-y	18	AAGGCCATTTCGACAAAA	2	0	0	1	0	0	0	0	0	0	0	0	0	0	1	0	0	0	0
miR5288-y	18	GCATTGAAGAACCCAGGG	2	0	0	0	0	0	0	0	0	2	0	0	0	0	0	0	0	0	0
miR1125-x	24	TTAACCAACGAGACCAACTGCAGC	2	1	0	0	0	0	0	1	0	0	0	0	0	0	0	0	0	0	0
miR5281-y	19	ATAAATAGGGACGGTGGGA	2	0	0	0	0	0	0	0	0	0	0	0	0	0	0	0	0	0	2
miR9560-y	18	CTCACAGTAGTTCTACCT	2	0	0	0	0	0	0	0	0	0	0	0	0	0	0	0	0	0	2
miR1115-y	18	AAAATGACTGAGCTCAAG	2	0	0	0	0	0	0	1	0	0	0	0	0	0	1	0	0	0	0
miR8182-x	18	TGCATTGCTGTTGATTCT	2	0	0	0	0	0	2	0	0	0	0	0	0	0	0	0	0	0	0
miR9494-y	18	CTTGAACACCTTCGTCTC	2	0	0	0	0	0	0	0	0	0	0	0	0	0	0	0	0	2	0
miR5268-x	20	GAGTGGAATGAAGATATAAT	2	0	0	0	0	0	0	0	2	0	0	0	0	0	0	0	0	0	0
miR5204-y	18	TGCTGGATGGATTTGTAG	2	0	1	0	0	0	0	0	0	0	0	0	0	0	0	0	0	0	1
miR4410-x	18	AATGTTGAGCCGTATGAG	2	0	0	0	0	0	2	0	0	0	0	0	0	0	0	0	0	0	0
miR8713-x	21	TTATAACTGTTTTAATGAACA	2	0	0	0	1	0	0	0	0	0	0	0	1	0	0	0	0	0	0
miR8002-x	18	TTAGGGATAATAATGGAA	2	0	1	0	0	0	0	0	0	1	0	0	0	0	0	0	0	0	0
miR415-x	18	AACAGATGAAGAGCAGCT	2	0	0	0	0	0	0	0	0	0	0	1	0	0	1	0	0	0	0
miR3633-y	22	GTTCCTATGCCACCCATTCCTA	1	0	0	0	0	0	0	0	0	1	0	0	0	0	0	0	0	0	0
miR3954-x	21	TTGGACAGAGAAATCACGGTC	1	0	0	0	0	0	0	0	1	0	0	0	0	0	0	0	0	0	0
miR8032-y	18	GTGAGTCGGTGTGATTTC	1	0	0	0	0	0	0	0	0	0	0	1	0	0	0	0	0	0	0
miR1167-y	18	GGGCTGTGATGATTTTAA	1	0	0	0	0	0	0	1	0	0	0	0	0	0	0	0	0	0	0
miR8142-x	18	TGAGGTCAGTAGAAAGTA	1	0	0	0	0	0	1	0	0	0	0	0	0	0	0	0	0	0	0
miR3627-y	18	AGTGCCTGTGTCTTACGA	1	0	0	0	0	0	0	0	0	0	0	0	0	0	0	1	0	0	0
miR853-x	18	ATCCTTTTCCTTTTGTAG	1	0	0	0	0	0	0	0	0	0	0	0	0	0	0	1	0	0	0
miR6169-x	18	TTTCTCTCCTCTCTCTCA	1	0	0	0	0	0	0	0	0	0	0	0	0	0	0	0	0	1	0
miR9476-x	18	GTGCTGCATCTTTTTTTT	1	0	0	0	0	0	0	0	0	0	0	0	0	0	0	0	0	1	0
miR9652-y	23	CAAGCTTAATGAGAACATGTGAA	1	0	0	0	0	0	0	0	0	0	0	0	0	1	0	0	0	0	0
miR5645-x	18	ATTTGAGTCAGGTCGTTT	1	0	0	0	0	0	0	0	0	0	1	0	0	0	0	0	0	0	0
miR7712-x	18	AGCACTGAAGTAACCACC	1	0	0	0	0	0	0	0	0	0	0	0	0	0	1	0	0	0	0
miR6426-y	18	GACATGGCAGTGAAGAAT	1	1	0	0	0	0	0	0	0	0	0	0	0	0	0	0	0	0	0
miR6114-y	21	CTTCACGTCCATTGTCCTTTC	1	0	0	0	0	0	0	0	1	0	0	0	0	0	0	0	0	0	0
miR3440-y	18	ACTGGATTGGTCAGGAGA	1	0	0	0	0	0	0	0	0	0	0	0	0	0	1	0	0	0	0
miR1081-x	19	GAGGCTTCCCTTAGATTCT	1	0	0	0	0	0	0	0	0	0	1	0	0	0	0	0	0	0	0
miR5181-x	18	CCTTCGGTCTACAATAAG	1	0	0	0	0	0	0	0	0	0	0	0	0	1	0	0	0	0	0
miR7528-y	18	TAATGCTAATCTGAGGCT	1	0	0	0	0	0	0	0	0	0	0	0	1	0	0	0	0	0	0
miR8562-x	19	GATGGATCTGAAATTTGGA	1	0	0	0	0	0	0	0	0	0	0	0	0	1	0	0	0	0	0
miR7777-y	18	TTCCACCCAACACAATAT	1	0	0	0	0	0	0	0	0	1	0	0	0	0	0	0	0	0	0
miR7709-x	18	AAAGTCTGACTAGGCATA	1	0	1	0	0	0	0	0	0	0	0	0	0	0	0	0	0	0	0
miR1426-x	19	TAGACTCTTGATGAAGATT	1	0	0	0	0	0	1	0	0	0	0	0	0	0	0	0	0	0	0
miR817-y	18	TTCAACATGAGGCCCGAT	1	0	0	0	0	0	0	0	0	0	0	0	0	0	1	0	0	0	0
miR5150-y	18	AAGCTAGAGCTGTCAGAA	1	0	0	0	0	0	0	0	0	0	0	0	0	0	1	0	0	0	0
miR7748-x	19	AGGATTCGGTTGAGCAAGC	1	0	0	0	0	0	0	0	0	0	0	0	0	0	0	0	0	1	0
miR9485-x	18	TGAAGTGTACGAGTTGCA	1	0	0	0	0	0	0	0	0	0	0	0	0	0	1	0	0	0	0
miR6480-y	19	GGGTTCTGAAACGATTGAA	1	0	0	0	1	0	0	0	0	0	0	0	0	0	0	0	0	0	0
miR1090-x	19	ACAGCCATTCTCAAAAAAA	1	0	0	0	0	0	0	0	1	0	0	0	0	0	0	0	0	0	0
miR5161-y	18	TGGAACAGAGGGAGTATT	1	0	0	0	1	0	0	0	0	0	0	0	0	0	0	0	0	0	0
miR9565-y	18	AAGCTAGAGAGAGAGAGA	1	0	0	0	0	0	0	0	0	0	0	1	0	0	0	0	0	0	0
miR8030-x	18	GTTGCTTTGGTCTCTGGT	1	0	0	0	0	0	0	0	0	0	0	0	0	0	0	0	1	0	0
miR1079-y	19	AAGAATAGCTATGTGGAGC	1	0	0	0	0	0	1	0	0	0	0	0	0	0	0	0	0	0	0
miR9741-y	18	AAATGTGTTGAACTGATA	1	0	0	0	0	0	0	0	0	0	0	0	0	0	0	1	0	0	0
miR5302-y	18	TTTCAACTCTAGCAATAT	1	0	0	0	0	0	0	0	0	0	0	0	1	0	0	0	0	0	0
miR9677-y	22	TGGCCGTTGGTAGAGTAGGAGA	1	0	0	0	0	0	0	1	0	0	0	0	0	0	0	0	0	0	0
miR1862-y	18	GATTTGTTTGTCTTGGGA	1	0	0	0	1	0	0	0	0	0	0	0	0	0	0	0	0	0	0
miR1223-y	18	TAGTCTTACACCTCTACT	1	0	0	0	0	0	0	0	0	0	0	0	0	1	0	0	0	0	0
miR4388-y	18	TCAGGGACCAGATTGACA	1	0	0	0	0	0	0	0	0	0	0	0	0	1	0	0	0	0	0
miR6429-y	18	GAAATGCATTGACTGGTA	1	0	0	0	0	0	0	0	0	0	0	0	1	0	0	0	0	0	0
miR407-x	18	AATTAAATAATATACTTT	1	0	0	0	0	0	0	0	0	1	0	0	0	0	0	0	0	0	0
miR3627-x	18	GCAGGAGAGACGGCACTC	1	0	0	1	0	0	0	0	0	0	0	0	0	0	0	0	0	0	0
miR870-x	18	AGAACCTGAAATTAGAAT	1	0	0	0	0	0	0	0	0	0	0	0	0	0	0	0	0	0	1
miR8782-y	21	TTTTTTGTGTTGAAGGGGACT	1	1	0	0	0	0	0	0	0	0	0	0	0	0	0	0	0	0	0
miR158-x	20	TTGTCAACAATTCTGGAAAA	1	0	0	0	0	0	0	0	0	0	0	1	0	0	0	0	0	0	0
miR8605-y	19	ATCAATCTCCACCATTGGA	1	0	0	0	0	0	0	0	0	1	0	0	0	0	0	0	0	0	0
miR3636-x	18	GTTCGCTTCTCTGATAGA	1	0	0	0	0	1	0	0	0	0	0	0	0	0	0	0	0	0	0
miR8697-x	18	AGGCACATTGATTCAAGT	1	0	0	0	1	0	0	0	0	0	0	0	0	0	0	0	0	0	0
miR5675-y	18	AGACGACAAGAATAGAAA	1	0	0	0	0	0	0	0	0	0	0	1	0	0	0	0	0	0	0
miR2592-z	19	TTCTTGAGTCCTGTAGTTT	1	0	0	0	0	0	0	0	0	0	0	0	0	0	1	0	0	0	0
miR9674-z	21	TTGAATTTGTCCATAGCATCA	1	0	0	0	0	0	0	1	0	0	0	0	0	0	0	0	0	0	0
miR9779-y	19	TATGCAACGTCTGAGGATA	1	0	0	0	0	0	0	0	0	0	0	0	0	0	0	0	1	0	0
miR8125-y	18	AGGAAAGAACTTGATGAG	1	0	0	0	0	0	1	0	0	0	0	0	0	0	0	0	0	0	0
miR8771-y	21	TTGGACAACCAAGATAGCATT	1	0	0	0	1	0	0	0	0	0	0	0	0	0	0	0	0	0	0
miR403-x	21	GGTTTGTGCGTGAATCTGACG	1	0	0	0	0	0	0	0	0	1	0	0	0	0	0	0	0	0	0
miR4994-y	18	TGAATTCCTTGAGCTAAT	1	0	0	0	0	0	0	0	0	0	0	0	0	0	0	0	1	0	0
miR5713-x	19	GCTTGGAAGAACGTTTTTT	1	0	1	0	0	0	0	0	0	0	0	0	0	0	0	0	0	0	0
miR5757-y	18	ATAGAGATTTATGTAACA	1	0	1	0	0	0	0	0	0	0	0	0	0	0	0	0	0	0	0
miR1103-y	18	AAAAACGAGGCGCATTCT	1	0	0	0	0	0	0	0	1	0	0	0	0	0	0	0	0	0	0
miR1127-y	22	ACAAGTATTTTTGGACAGAGGG	1	0	0	0	0	0	0	0	0	0	0	0	0	0	0	0	1	0	0
miR5814-x	18	ATCAACTTAGGACCCATG	1	0	0	0	0	0	0	0	0	0	0	0	1	0	0	0	0	0	0
miR173-x	19	TTGCAGAGAGAAATCAGAA	1	0	0	0	0	0	0	1	0	0	0	0	0	0	0	0	0	0	0
miR6287-x	18	AAGTGGAAGTTTTGAACG	1	0	0	0	0	0	0	0	0	0	1	0	0	0	0	0	0	0	0
miR900-x	18	CTTCCCAGCCACAAGAAC	1	0	0	1	0	0	0	0	0	0	0	0	0	0	0	0	0	0	0
miR7804-y	18	TTAATCGAACAAACATTT	1	0	0	0	0	0	0	0	0	0	0	0	0	0	0	0	0	0	1
miR8569-y	18	ATCCGGTAGGTCGGACCA	1	0	0	0	0	0	0	0	0	0	0	0	0	1	0	0	0	0	0
miR8780-y	18	TCTTTGATGATGTGGCAG	1	0	0	0	0	0	0	0	0	1	0	0	0	0	0	0	0	0	0
miR4372-z	18	AATAAACTCGTGACCTGT	1	0	0	0	0	0	0	0	0	0	0	1	0	0	0	0	0	0	0
miR7785-x	18	AGAGTTGGTGATGGGAGA	1	0	0	0	0	0	0	0	0	0	1	0	0	0	0	0	0	0	0
miR8686-x	19	AGAGAATGTCAGTTCGAGA	1	0	0	0	0	0	0	0	0	0	0	0	1	0	0	0	0	0	0
miR5565-x	18	TTACAATCCATGTATGTT	1	0	0	0	0	0	0	0	0	0	0	0	0	0	0	0	1	0	0
miR3512-y	18	TCCGAAATGATGACAAAT	1	1	0	0	0	0	0	0	0	0	0	0	0	0	0	0	0	0	0
miR7823-y	18	TGCATGCATGAATTTAAA	1	0	0	0	0	0	0	0	0	0	0	0	0	1	0	0	0	0	0
miR8756-x	19	TTAAAAATTTAAAGGCATT	1	1	0	0	0	0	0	0	0	0	0	0	0	0	0	0	0	0	0
miR4395-x	20	TCTGGATGGGAGTATTGGCT	1	0	0	0	0	0	1	0	0	0	0	0	0	0	0	0	0	0	0
miR5565-y	18	TGTGGATTGAGATAGATA	1	0	0	0	0	0	1	0	0	0	0	0	0	0	0	0	0	0	0
miR5527-x	18	CTCACCCACGGCAGTAAC	1	0	0	0	0	0	0	0	0	0	0	0	0	0	0	0	1	0	0
miR2610-x	18	AGATTTAGACTTATATGG	1	0	1	0	0	0	0	0	0	0	0	0	0	0	0	0	0	0	0
miR5833-x	18	CTCCTCCTCGGGCACATC	1	0	0	0	0	0	0	0	0	0	1	0	0	0	0	0	0	0	0
miR6195-x	19	GAGTACGTAGAAGAGATGA	1	0	0	0	0	0	0	0	0	0	0	0	0	1	0	0	0	0	0
miR8666-x	18	GTGATGATGAGTACATAA	1	0	0	0	0	0	0	0	0	0	0	0	1	0	0	0	0	0	0
miR5558-x	19	TTTCGAATTCTAAGTATAT	1	0	0	0	0	0	0	0	0	0	0	0	0	0	0	0	0	1	0
miR8048-y	18	AGATGGACGTGGTAATGA	1	0	0	0	0	0	0	0	0	0	0	0	0	0	0	0	0	0	1
miR418-y	19	GATAATGTGATGATGAAAT	1	0	0	0	0	0	0	0	0	0	0	0	0	0	0	0	0	1	0
miR7525-x	18	CGTTTTGGAACATAACTA	1	0	0	0	0	0	0	0	0	0	0	0	0	0	0	0	1	0	0
miR8598-x	18	TTAGTCAACACGCTCGGT	1	0	0	0	0	0	0	0	0	0	1	0	0	0	0	0	0	0	0
miR5137-x	18	ATAGCGGAGAAGAAGAAG	1	0	0	1	0	0	0	0	0	0	0	0	0	0	0	0	0	0	0
miR1027-x	21	TTCTTTCTGCTCTTCCAATCT	1	0	0	0	0	0	0	0	0	0	0	1	0	0	0	0	0	0	0
miR6111-x	21	TTAATATCACGATGTATGACT	1	0	1	0	0	0	0	0	0	0	0	0	0	0	0	0	0	0	0
miR6476-x	18	TGGAGATGAAACATGGTC	1	0	0	0	0	0	0	0	0	0	0	0	0	0	1	0	0	0	0
miR5267-x	19	AGGCCTTTGCTCGGATACA	1	0	0	0	0	0	1	0	0	0	0	0	0	0	0	0	0	0	0
miR6230-y	18	CAAGTTTAGGGACCTAGG	1	0	0	0	0	0	0	0	0	0	0	0	0	0	0	0	0	1	0
miR5212-y	18	CGAAATAGATATCCAACC	1	0	0	0	0	0	0	0	0	0	0	0	0	0	0	0	0	0	1
miR818-y	18	GAGGGAGCATGTAAAATG	1	0	0	0	1	0	0	0	0	0	0	0	0	0	0	0	0	0	0
miR7797-x	21	ATTTGATTTCGTCTTACCTTG	1	0	0	0	0	1	0	0	0	0	0	0	0	0	0	0	0	0	0
miR9654-y	22	TTCCGAATGGCTTGAAGCAAAT	1	1	0	0	0	0	0	0	0	0	0	0	0	0	0	0	0	0	0
miR6458-y	18	TGAAATATATAAGGTATT	1	0	0	0	0	0	1	0	0	0	0	0	0	0	0	0	0	0	0
miR6432-x	18	GGGCCCTAGAGAAAAAGA	1	0	0	0	0	0	0	0	0	0	0	0	0	1	0	0	0	0	0
miR1122-y	21	AGACTTATATTTAGGAACGGA	1	0	0	0	0	0	0	0	0	0	0	0	0	0	0	0	1	0	0
miR6288-y	18	AAATGACTAGTGGCGAGT	1	1	0	0	0	0	0	0	0	0	0	0	0	0	0	0	0	0	0
miR5143-y	19	TATGTTGGCAATGGAAGAA	1	0	0	0	0	0	0	0	0	0	0	0	0	0	0	0	0	1	0
miR5076-y	18	ATGGGAGAAGAGCAGATT	1	0	0	0	0	0	0	0	0	0	0	0	0	1	0	0	0	0	0
miR6485-x	18	AGGATGTAGGAGTGCATA	1	0	0	0	0	0	0	0	0	0	0	0	0	1	0	0	0	0	0
miR7529-y	18	AACCGTACCATCACTTTA	1	0	0	0	0	0	0	0	0	1	0	0	0	0	0	0	0	0	0
miR2599-x	21	ATGGCTTCAAGGAATCTACTT	1	0	0	0	0	0	0	0	0	0	0	0	0	0	0	0	1	0	0
miR7716-x	18	TCAGTTGGTGGAGAAGAA	1	0	0	0	0	0	1	0	0	0	0	0	0	0	0	0	0	0	0
miR1512-x	18	CTGAAAATGCTGAAAGTA	1	0	0	0	0	0	0	0	0	0	0	1	0	0	0	0	0	0	0
miR1097-x	18	ATTTTGGTTGTTGGAATT	1	0	0	0	0	0	0	0	0	0	0	1	0	0	0	0	0	0	0
miR5819-x	18	GAGGACGAGGGACACGGC	1	0	0	1	0	0	0	0	0	0	0	0	0	0	0	0	0	0	0
miR1851-y	18	GGGATGGCAACTTGGCGA	1	0	0	0	0	0	0	0	0	0	0	0	0	0	0	0	0	1	0
miR1070-x	20	TATCCGTGTCTAGTAAAACT	1	0	0	0	0	0	0	1	0	0	0	0	0	0	0	0	0	0	0
miR866-y	19	CAAAATCCGTCCTAGAAGA	1	0	0	0	0	1	0	0	0	0	0	0	0	0	0	0	0	0	0
miR7811-x	18	TGGAGATACCGAATGGAG	1	1	0	0	0	0	0	0	0	0	0	0	0	0	0	0	0	0	0
miR8555-y	18	GAGGTAACTTGGCATCTA	1	0	0	0	0	0	0	0	0	0	0	0	0	0	1	0	0	0	0
miR1063-x	18	TCTGGGAGTGCTGCATCT	1	0	0	0	0	0	0	0	0	0	0	0	0	1	0	0	0	0	0
miR7492-x	21	AGAACATGAGCTCTAGCAGCA	1	0	0	0	0	0	0	0	0	0	0	0	0	0	0	1	0	0	0
miR6170-y	19	AAGAAAAAGAAAAGAGGGA	1	0	0	0	0	0	0	0	0	0	0	0	0	0	1	0	0	0	0
miR1520-x	18	CGTGTCATGTACTTATTA	1	0	0	1	0	0	0	0	0	0	0	0	0	0	0	0	0	0	0
miR8123-x	21	TTGAGCAATGGCACACAGACC	1	0	0	0	0	0	0	0	0	0	0	0	1	0	0	0	0	0	0
miR8007-x	18	TTTGACACTATTTGAATT	1	0	0	0	0	0	0	0	0	0	0	0	0	0	0	0	0	1	0
miR5290-y	18	AGAGAGAAAGACACAGAA	1	0	0	0	0	0	0	0	0	0	1	0	0	0	0	0	0	0	0
miR3623-y	18	CCTTGGACGAATTTGCTT	1	0	0	0	0	0	0	0	0	0	0	0	0	0	0	0	1	0	0
miR4233-y	18	AGCATCACCATCAACTCC	1	0	0	0	0	0	0	0	0	0	0	0	0	0	1	0	0	0	0
miR8173-y	18	AAATGTGCTGATTCGAGA	1	0	0	0	0	0	0	0	0	0	0	0	0	0	0	0	0	1	0
miR6456-y	18	TGAGGCCTTCCATTAGAA	1	0	0	0	0	0	0	0	0	1	0	0	0	0	0	0	0	0	0
miR8672-x	18	TGAAATGATTGTATTAAA	1	0	0	0	0	0	0	0	0	0	1	0	0	0	0	0	0	0	0
miR7752-y	19	GGAAAATGATCGGTTGGAG	1	0	0	1	0	0	0	0	0	0	0	0	0	0	0	0	0	0	0
miR5176-y	18	TGATGATGCTGCATAGAA	1	0	0	0	0	0	0	0	1	0	0	0	0	0	0	0	0	0	0
miR8740-y	19	TAATGATATGGCACTATAT	1	0	0	1	0	0	0	0	0	0	0	0	0	0	0	0	0	0	0
miR6271-y	21	ACGATTGAGAGATATAAAGCT	1	0	0	0	0	0	0	0	0	0	0	0	0	0	0	1	0	0	0
miR1320-y	21	CTGTAAAATGCATTCGTTCCT	1	0	0	0	0	0	0	0	0	0	0	0	0	0	1	0	0	0	0
miR863-y	19	CTGAGGGCAACAAGACATA	1	0	0	0	0	0	0	0	0	0	0	0	0	0	0	0	1	0	0
miR3637-y	19	TTTTCAACAAGACTCAATG	1	0	0	0	0	0	0	0	0	0	0	0	0	0	0	0	0	1	0
miR8583-x	18	AGTGACGTAGCTACTGGA	1	0	0	0	0	0	0	0	1	0	0	0	0	0	0	0	0	0	0
miR6186-y	18	AAGGTGTTGAGAGAGAGG	1	0	0	0	0	0	0	0	0	0	0	0	0	0	0	0	0	0	1
miR840-x	21	CTAAAGGACCTAAATTATCAA	1	0	0	0	0	0	0	0	1	0	0	0	0	0	0	0	0	0	0
miR7520-y	18	AGGAGGAAGATGATGACA	1	0	0	0	1	0	0	0	0	0	0	0	0	0	0	0	0	0	0
miR1423-x	20	CTTCACCTTGGGCGCTCGAT	1	0	0	0	0	0	0	1	0	0	0	0	0	0	0	0	0	0	0
miR474-y	18	CTGGTGAGTTTGGCTGGG	1	1	0	0	0	0	0	0	0	0	0	0	0	0	0	0	0	0	0
miR1069-y	18	GATAAATCAAAGTCCTCT	1	0	0	0	0	0	0	0	0	0	0	0	0	0	0	1	0	0	0
miR444-x	20	TCGAGGTGGCAACTGCATAA	1	0	0	0	0	0	0	0	0	0	0	1	0	0	0	0	0	0	0
miR6232-x	18	TGGTACAAGGAATTTGCA	1	0	0	0	0	0	0	0	0	0	0	0	0	0	0	1	0	0	0
miR437-x	18	ACATAGAGACGATTGACT	1	0	0	0	0	0	0	1	0	0	0	0	0	0	0	0	0	0	0
miR6231-x	21	TCCGTGAGTCCACAAATACTC	1	0	0	0	0	0	0	0	0	0	0	0	0	0	0	1	0	0	0
miR9655-y	18	AAGGGAAGGAATTAGACA	1	1	0	0	0	0	0	0	0	0	0	0	0	0	0	0	0	0	0
miR868-x	18	TTGTCGGCAATTGAGGAT	1	0	1	0	0	0	0	0	0	0	0	0	0	0	0	0	0	0	0
miR864-y	19	AATTTAATAATACCTTGAA	1	0	0	0	0	0	0	0	0	0	0	0	0	1	0	0	0	0	0
miR9488-x	19	GGGTAGGCTTTTATGTACC	1	0	0	0	0	0	0	0	0	0	0	0	0	0	0	0	0	1	0
miR1850-x	18	GAAGGAAAGTTGGGAGCT	1	0	0	0	0	0	0	0	0	1	0	0	0	0	0	0	0	0	0
miR7815-y	19	TTCTAATAAATCGTGGGAT	1	0	0	0	1	0	0	0	0	0	0	0	0	0	0	0	0	0	0
miR3706-y	18	GTTTTGGAGAAATGGAGA	1	0	0	0	0	0	0	0	0	0	0	0	0	0	0	0	0	0	1
miR8029-y	18	TCCCTTTTTCTTTGTTTT	1	0	0	0	1	0	0	0	0	0	0	0	0	0	0	0	0	0	0
miR2661-x	18	AATAGGTTTGGGGAAATG	1	0	0	0	0	0	0	0	1	0	0	0	0	0	0	0	0	0	0
miR5741-y	18	TAGGGACCAAACTGATGG	1	0	0	0	1	0	0	0	0	0	0	0	0	0	0	0	0	0	0
miR8718-x	18	TTTTGCAAGAATTTCTGC	1	0	0	0	0	0	0	0	0	0	0	0	0	0	0	0	0	0	1
miR8016-y	18	TTTTTGAGTGGAAGGCCT	1	0	0	0	0	0	0	0	0	0	0	0	0	0	0	1	0	0	0
miR6233-y	18	CCCAAGCTTGGTTTTGGT	1	0	0	0	0	0	0	0	0	0	1	0	0	0	0	0	0	0	0
miR7714-x	21	TCTCCGATCCATATTACTTGT	1	0	0	0	0	0	0	0	0	0	0	0	0	1	0	0	0	0	0
miR477-y	18	GTCTTTGAGGATAGTGGA	1	0	0	0	0	0	0	0	0	0	0	0	0	0	0	0	1	0	0
miR1119-y	19	CACGACGTGATGCTGAGTT	1	1	0	0	0	0	0	0	0	0	0	0	0	0	0	0	0	0	0
miR7540-z	18	ATATGGTAAGTGATGAGA	1	0	0	0	0	0	0	0	0	0	0	0	1	0	0	0	0	0	0
miR8723-x	19	AACAGTAAGCTGACGTGGG	1	0	0	0	0	0	0	0	0	0	0	0	0	0	0	0	0	0	1
miR1130-x	21	GCTCCGTCTCATAATGTAAGA	1	0	0	0	0	0	0	1	0	0	0	0	0	0	0	0	0	0	0
miR7825-y	18	GAAAGGCAGGCAGATAGA	1	0	0	0	0	0	0	0	0	0	0	0	1	0	0	0	0	0	0
miR3979-x	18	CTCTCTCTCTCTCTTGAA	1	0	0	0	0	0	0	1	0	0	0	0	0	0	0	0	0	0	0
miR3514-x	18	AGGATCCTGTATTATCGG	1	0	0	0	0	0	0	0	0	0	1	0	0	0	0	0	0	0	0
miR6462-x	18	CAAAAATGGGAGAAGAGA	1	0	0	0	0	0	0	0	0	0	0	0	0	0	1	0	0	0	0
miR5385-x	18	TCACCACCAACTCCACCA	1	0	0	0	1	0	0	0	0	0	0	0	0	0	0	0	0	0	0
miR7508-x	19	AAAAAAAGAAGCCGGGAGA	1	0	0	0	0	0	0	0	0	1	0	0	0	0	0	0	0	0	0
miR5370-x	21	CCAAAGATTGTCCAAAAAGAA	1	0	0	0	0	0	0	0	0	0	0	0	1	0	0	0	0	0	0
miR2870-y	18	TCAGTTTGGGGAGAGAAT	1	0	0	0	0	0	0	0	0	0	0	0	0	1	0	0	0	0	0
miR9486-y	18	TTTCAAGGGACTAGAGAT	1	0	0	0	0	1	0	0	0	0	0	0	0	0	0	0	0	0	0
miR4996-y	18	AGAAGCTGCCCATGATCT	1	0	0	0	0	0	0	0	0	0	0	0	0	0	0	0	1	0	0
miR7726-y	18	TCTGTCACTGTTGTCGCC	1	0	0	0	0	0	0	0	0	0	0	0	0	0	0	0	0	1	0
miR9745-x	18	TAAATTTGGACCATTTAA	1	0	0	0	0	0	0	0	0	0	0	0	0	1	0	0	0	0	0
miR8762-x	18	TCTTTGATGATGTGGCAG	1	0	0	0	0	0	0	0	0	1	0	0	0	0	0	0	0	0	0
miR2949-x	18	GTCGATTGAACTGGATTT	1	0	0	0	0	0	0	0	0	0	0	0	0	0	1	0	0	0	0
miR6451-y	19	ATGTAAGGTCATGTTAGGT	1	0	0	0	0	0	0	0	0	0	0	0	0	0	0	0	0	1	0
miR5750-x	18	AAAAGGGAGAGAGATCAG	1	0	0	0	0	1	0	0	0	0	0	0	0	0	0	0	0	0	0
miR5198-y	18	AAAAGAGATTGAGGCAAC	1	0	0	0	0	0	0	0	1	0	0	0	0	0	0	0	0	0	0
miR6296-y	18	TCTAAGGCCCCTAAATGA	1	0	0	0	0	0	0	0	0	0	0	0	0	1	0	0	0	0	0
miR5562-y	19	CTATGTTGGGAAGGCTGCA	1	0	0	0	0	0	0	0	0	0	0	0	1	0	0	0	0	0	0
miR531-x	21	CTCGCCGGAGCAGCGTGCAAT	1	1	0	0	0	0	0	0	0	0	0	0	0	0	0	0	0	0	0
miR8035-y	18	CACCTTCAATGTCACTTT	1	0	0	0	0	0	0	0	0	0	0	0	0	0	0	0	0	1	0
miR1064-x	20	GGCACTCTGAGAAAAATCAT	1	0	1	0	0	0	0	0	0	0	0	0	0	0	0	0	0	0	0
miR2111-y	18	AAGCCTTGGGATGATGAG	1	0	0	0	0	0	0	0	0	0	0	1	0	0	0	0	0	0	0
miR8659-z	21	TTTTGTACGGTTGTTTGTGGA	1	0	0	0	0	0	0	0	0	0	0	0	0	0	1	0	0	0	0
miR5168-x	21	GGGTTGTTGTCTGGTTCAAGG	1	0	0	0	0	0	0	0	0	0	0	0	0	0	0	0	1	0	0
miR4416-x	18	GTGAGAGAAACAGGTTTT	1	0	0	0	0	0	1	0	0	0	0	0	0	0	0	0	0	0	0
miR3628-y	18	GCTCGGCTCTCGCATCCC	1	0	0	0	0	0	0	0	0	0	1	0	0	0	0	0	0	0	0
miR4348-y	20	TTTGAATTTTACTATTAGGT	1	0	0	0	0	0	0	0	0	0	0	0	0	0	0	0	0	1	0
miR5492-x	18	GGAGAAGGAGAATTTATA	1	0	1	0	0	0	0	0	0	0	0	0	0	0	0	0	0	0	0
miR5381-z	18	CACGATCTGTGGAGCCGA	1	0	0	0	0	0	0	0	0	0	0	0	0	1	0	0	0	0	0
miR7696-x	19	AGTTCTGATAATTTAAAAA	1	0	0	0	0	0	0	0	0	0	0	0	0	1	0	0	0	0	0
miR1508-y	19	AGAAAGGGAATTAGCAGAT	1	0	0	0	0	0	0	0	0	0	0	0	1	0	0	0	0	0	0
miR4236-y	19	ACTAATTTGTTACCCTCCT	1	0	1	0	0	0	0	0	0	0	0	0	0	0	0	0	0	0	0
miR5783-y	18	ACGACGACGGGGATGACG	1	0	1	0	0	0	0	0	0	0	0	0	0	0	0	0	0	0	0
miR7727-y	18	TATTGGTACTAATGAGCT	1	0	0	0	0	0	0	0	0	0	0	0	0	0	0	0	1	0	0
miR6160-x	18	GGCATATGTGGACCAACT	1	0	0	0	0	0	1	0	0	0	0	0	0	0	0	0	0	0	0
miR1861-x	18	TGTGGAAAGAACTGAGGA	1	0	0	0	0	0	0	0	0	0	0	0	0	0	0	0	0	0	1
miR6445-x	21	ATTCCTCTTCCTCCAATGGCT	1	0	0	0	0	0	0	0	0	0	0	0	0	0	0	1	0	0	0
miR417-y	18	ATGTAGTGAATTGTTTCC	1	0	0	0	0	0	0	0	0	0	0	1	0	0	0	0	0	0	0
miR6233-x	18	TGAGGCTAGAGCCAAACT	1	0	0	0	0	0	0	0	0	0	0	0	0	0	0	1	0	0	0
miR162-x	22	TGGAGGCAGCGGTTCATCGATC	1	0	0	0	0	0	0	0	0	0	0	0	0	0	0	1	0	0	0
miR9408-y	20	ACGTTTCATCTCAGAGAATG	1	0	1	0	0	0	0	0	0	0	0	0	0	0	0	0	0	0	0
miR4387-y	18	GCGTGATGACGAGGCACT	1	0	0	0	0	0	0	0	0	0	0	0	0	0	0	0	0	0	1
miR864-x	18	AGGTTTGATTGAATTCAA	1	0	0	0	0	0	0	0	0	0	0	0	0	0	0	1	0	0	0
miR1522-x	19	ATTTATGGCTTAGAATGAA	1	0	0	0	0	0	0	1	0	0	0	0	0	0	0	0	0	0	0
miR8636-x	18	ACCGGACCATCTAACAAT	1	0	0	0	0	1	0	0	0	0	0	0	0	0	0	0	0	0	0
miR9558-y	19	AAGCCAGAACTTTCCTTTC	1	0	0	0	0	0	0	0	0	0	0	0	0	0	0	0	0	0	1
miR2950-y	19	GGTGTGCAGGAGGTGGAAA	1	0	0	0	0	0	0	0	0	0	0	1	0	0	0	0	0	0	0
miR9729-x	18	GAGTAGCAACATTCAGAA	1	0	0	0	0	0	0	0	0	0	0	1	0	0	0	0	0	0	0
miR8767-x	18	CTTTTCCAACTCTGTCAA	1	0	0	0	0	0	0	0	0	1	0	0	0	0	0	0	0	0	0
miR8711-x	18	TACACTAAGGGCAGTGGA	1	0	0	1	0	0	0	0	0	0	0	0	0	0	0	0	0	0	0
miR5228-x	18	CTGGTGTACAGCTTGATC	1	0	1	0	0	0	0	0	0	0	0	0	0	0	0	0	0	0	0
miR8011-y	18	TTAGACAAATAGAAGCCT	1	0	0	0	0	0	0	0	0	0	0	0	1	0	0	0	0	0	0
miR1866-x	18	AGGGAATTTGCAGGAATT	1	0	1	0	0	0	0	0	0	0	0	0	0	0	0	0	0	0	0
miR1088-y	18	CCGAGCTCTTTTTCTTCT	1	0	0	0	0	0	0	0	1	0	0	0	0	0	0	0	0	0	0
miR5576-y	18	TTGGCATGTGGAAACACT	1	0	0	0	0	1	0	0	0	0	0	0	0	0	0	0	0	0	0
miR5181-y	21	GACACTTACTTTGGAACGGAG	1	0	0	0	0	0	0	0	0	0	0	0	0	1	0	0	0	0	0
miR855-x	18	AAGCTAAGGGAAATGAAG	1	0	0	0	0	0	1	0	0	0	0	0	0	0	0	0	0	0	0
miR1060-x	18	TTGTCACAGGATTGCACA	1	0	0	0	0	0	0	0	0	1	0	0	0	0	0	0	0	0	0
miR1108-y	18	CTTGCGCTGAGAGAGATA	1	0	0	0	0	0	0	1	0	0	0	0	0	0	0	0	0	0	0
miR5219-y	21	CATGGTATCTCAGCAGCTGCA	1	0	0	0	0	0	0	0	0	0	0	0	0	0	0	1	0	0	0
miR414-z	19	CGTCATCCTCGTCATCGTC	1	0	0	0	0	0	0	0	0	0	1	0	0	0	0	0	0	0	0
miR8014-y	21	TAATGAATACAAGTTTTGGAT	1	0	0	0	0	0	0	0	0	0	0	0	0	0	0	0	0	1	0
miR6474-x	19	TCAGATCAGTAGGAAGCAT	1	0	0	0	0	0	0	0	0	0	0	0	1	0	0	0	0	0	0
miR1878-y	18	TGTAGTGTTCGGATCGAG	1	0	0	0	0	0	0	0	0	0	0	0	0	0	0	0	0	1	0
miR2089-y	18	TAGGATGGGTGTGATAGG	1	0	0	0	0	0	0	0	0	0	0	0	0	0	0	0	0	0	1
miR7761-x	18	AATGCCGTCTCTTCCCCA	1	0	0	0	0	0	0	0	0	0	0	0	0	0	0	0	0	1	0
miR2876-y	19	CTATGTCAACACTGTTGCC	1	0	0	0	1	0	0	0	0	0	0	0	0	0	0	0	0	0	0
miR5817-x	18	GCACCGATTTTGAAAGAA	1	0	0	0	0	0	0	0	0	0	0	0	0	1	0	0	0	0	0
miR8150-y	22	AAACCTGAGCCAGATGTTGAGC	1	0	0	0	0	0	0	0	0	0	0	0	0	0	0	0	1	0	0
miR5023-x	19	AAAATGGAAGTGGATAAGG	1	0	0	0	0	0	0	0	0	0	0	0	1	0	0	0	0	0	0
miR2598-x	18	GTTGATTATTCTGGCATG	1	0	1	0	0	0	0	0	0	0	0	0	0	0	0	0	0	0	0
miR8674-y	18	ATGGACCATGGATTATTT	1	0	0	0	1	0	0	0	0	0	0	0	0	0	0	0	0	0	0
miR5500-y	18	CTGATGAAAGCTTCCGGC	1	0	0	1	0	0	0	0	0	0	0	0	0	0	0	0	0	0	0
miR5636-x	18	GTTGCAGAGATAGACGGC	1	0	0	0	0	0	0	0	0	0	0	0	1	0	0	0	0	0	0
miR8760-x	18	ATCGTCAAATTTGGGCAT	1	0	0	0	0	0	1	0	0	0	0	0	0	0	0	0	0	0	0
miR9758-x	18	TATGTGTAGTTATGCAAG	1	0	0	0	1	0	0	0	0	0	0	0	0	0	0	0	0	0	0
miR8719-x	18	AAATTGGAGAACTGGAGA	1	1	0	0	0	0	0	0	0	0	0	0	0	0	0	0	0	0	0
miR6117-x	20	GGTTGATCGGTTGGAAGACA	1	0	0	0	1	0	0	0	0	0	0	0	0	0	0	0	0	0	0
miR5029-x	18	GAGAGAGAGCACTGTAAA	1	0	0	0	0	0	0	0	1	0	0	0	0	0	0	0	0	0	0
miR1879-y	18	GCTTGGGGATGAGGTGGG	1	0	0	0	0	0	0	0	0	0	0	0	0	1	0	0	0	0	0
miR8721-y	18	ACATCGAGATTTTGAGGA	1	0	0	0	0	0	0	0	0	0	0	0	0	0	0	0	0	1	0
miR7754-x	18	TCTCGCGGCTGAGGCACT	1	0	0	0	0	0	0	0	0	0	0	0	0	1	0	0	0	0	0
miR1067-x	18	ACGGAAGTTTGATGCAAT	1	0	0	0	0	0	0	0	0	0	1	0	0	0	0	0	0	0	0
miR2103-x	18	TCTCCGTGCGCGGTCGGC	1	0	0	0	0	0	0	0	0	0	0	0	0	0	0	0	0	0	1
miR5513-y	18	AAGAAAAGACAACAGACT	1	0	0	0	0	0	0	0	0	0	0	0	0	0	0	0	0	1	0
miR9493-y	21	AATTATGGAACGAAGGGAGAA	1	0	0	0	0	0	1	0	0	0	0	0	0	0	0	0	0	0	0
miR5662-y	18	ATTGGTGACCATTGGAGA	1	0	0	0	0	0	0	0	0	0	0	0	0	1	0	0	0	0	0
miR948-x	18	TCAGGCTGTGTTGTATCC	1	0	0	0	0	0	0	0	0	0	1	0	0	0	0	0	0	0	0
miR1875-y	18	AATGGAGTGGAGTGCAAG	1	0	0	0	0	0	0	0	0	0	0	1	0	0	0	0	0	0	0
miR850-x	18	AAGAACCGGACTACAACC	1	0	0	0	0	0	0	0	0	1	0	0	0	0	0	0	0	0	0
miR5206-y	18	TCATGGGATCCTGTTTGT	1	0	1	0	0	0	0	0	0	0	0	0	0	0	0	0	0	0	0
miR774-x	18	GAGGAAGATTTGGACGAC	1	0	0	0	0	0	0	0	0	0	0	1	0	0	0	0	0	0	0
miR7496-y	19	AATTGATAGAATGTGTATA	1	0	0	0	0	0	0	0	0	0	0	0	0	0	1	0	0	0	0
miR1118-x	22	TGCACTACATTATGGAACGGAG	1	0	0	0	0	0	0	0	0	0	0	0	0	1	0	0	0	0	0
miR5257-x	18	AACAAGTAGAACCTTAAT	1	0	0	0	0	0	0	1	0	0	0	0	0	0	0	0	0	0	0
miR3433-x	18	GTCATATGAGAACTTTGA	1	0	0	0	0	0	0	0	0	0	0	0	0	1	0	0	0	0	0
miR5302-x	19	GAAATGCGATACTTGGAAA	1	0	0	0	0	0	0	0	0	0	0	0	0	0	0	0	0	1	0
miR6439-x	19	CCCGAATGAAGAAGCAGAA	1	0	0	0	0	1	0	0	0	0	0	0	0	0	0	0	0	0	0
miR7997-x	18	TTGCACGGACACTTCAAA	1	0	0	0	0	0	0	0	0	0	0	0	0	0	1	0	0	0	0
miR5039-x	19	TCCTTTTTTAATCGTTGGA	1	0	0	1	0	0	0	0	0	0	0	0	0	0	0	0	0	0	0
miR5376-x	18	GATTTTAAGCATTTGGGA	1	0	0	0	0	0	0	1	0	0	0	0	0	0	0	0	0	0	0
miR8589-y	18	GATCTTTAGGCCACGGAA	1	0	0	0	1	0	0	0	0	0	0	0	0	0	0	0	0	0	0
miR3701-y	18	AACACTGCCCACCCTGCA	1	1	0	0	0	0	0	0	0	0	0	0	0	0	0	0	0	0	0
miR9666-y	22	CGGTAGGGCTGTATGATGGCGA	1	0	0	0	0	0	0	0	0	0	0	0	0	0	0	0	1	0	0
miR8584-y	21	TTTGAACCCTGGGCGTCACGC	1	0	0	0	0	0	0	0	0	0	0	0	0	0	0	0	0	1	0
miR8556-x	19	TAAAAGACGGGAAATGTAA	1	0	0	0	0	0	0	0	0	0	0	0	0	1	0	0	0	0	0
miR8031-x	20	AGAGACATCAACTAAGACTT	1	0	0	0	0	0	0	0	0	0	1	0	0	0	0	0	0	0	0
miR2097-y	19	CTCTTCTTCGTCTGGCATT	1	0	0	0	0	0	0	0	0	0	0	0	0	0	0	0	0	0	1
miR6142-x	18	TTTTTAGGCAATGACGAC	1	0	0	0	0	0	0	1	0	0	0	0	0	0	0	0	0	0	0
miR7991-x	20	GGTCGGAATTTTTAAAAAAT	1	0	0	0	0	0	0	0	0	0	0	0	1	0	0	0	0	0	0
miR7717-x	18	GCTAAGGCGACTGAGAAA	1	0	0	0	0	0	0	0	0	0	0	1	0	0	0	0	0	0	0
miR4352-y	18	TTTAAAATGTAGACAACC	1	0	0	0	0	0	0	0	0	0	0	0	0	0	0	0	0	0	1
miR8648-y	20	TTCAGCACAGTAGAGGGATT	1	0	0	0	0	0	0	0	0	0	1	0	0	0	0	0	0	0	0
miR7982-y	19	TACGTTGGATGATAATAGT	1	0	0	0	0	0	0	0	0	0	0	0	0	0	0	0	1	0	0
miR1440-y	18	GTTTAGGACAGTGGTATT	1	0	0	0	0	0	0	0	0	0	0	0	1	0	0	0	0	0	0
miR4415-y	21	TTGATTCTCATCACAACTTGG	1	0	0	0	0	0	0	0	0	0	0	0	0	0	0	0	0	1	0
miR2863-y	19	TAGTAGGACTCGAACGGGC	1	0	1	0	0	0	0	0	0	0	0	0	0	0	0	0	0	0	0
miR7530-x	18	CCTCTCTTCACTCTCTTA	1	0	0	0	0	0	0	0	0	0	0	1	0	0	0	0	0	0	0
miR1039-y	18	GTGAGACGGGCTCAAGAA	1	0	0	0	0	0	0	0	1	0	0	0	0	0	0	0	0	0	0
miR3629-y	19	GGCTGCTGAGAAACTGAAG	1	0	0	0	0	0	0	0	0	0	0	0	0	0	0	1	0	0	0
miR2590-x	19	AAGAATGACATGGCCGATT	1	0	0	0	0	0	0	0	1	0	0	0	0	0	0	0	0	0	0
miR1153-y	18	CCTTGAAATTGCCGGGAG	1	1	0	0	0	0	0	0	0	0	0	0	0	0	0	0	0	0	0
miR7751-y	18	GTTATGGTGCACCCGGCT	1	0	0	0	0	0	0	0	0	0	0	0	0	0	0	1	0	0	0
miR5175-x	20	ATTCCAAATTACTCGTCGTT	1	0	0	0	0	0	0	0	0	0	0	0	0	1	0	0	0	0	0
miR5255-y	18	TTTTAGAGGACATGGGTA	1	1	0	0	0	0	0	0	0	0	0	0	0	0	0	0	0	0	0
miR8603-y	19	GAGCGTGTGGTTGGACATG	1	0	0	0	0	0	0	0	0	0	0	1	0	0	0	0	0	0	0
miR1151-x	18	AGTTCGGGCCTCATAACC	1	0	0	0	0	0	0	0	0	0	0	0	0	0	1	0	0	0	0
miR5634-x	19	GTGGGACTTTGTGAATTGA	1	0	0	0	0	0	0	0	0	0	0	0	1	0	0	0	0	0	0
miR6235-x	18	AGAGAAATTTACTGTTGG	1	0	1	0	0	0	0	0	0	0	0	0	0	0	0	0	0	0	0
miR8037-x	20	TTTGGAGGAGAAGGAACCGT	1	0	0	0	0	0	0	0	0	0	0	0	0	0	0	0	0	0	1
miR402-x	19	TCGAGGCCTATTAAAACAC	1	0	0	1	0	0	0	0	0	0	0	0	0	0	0	0	0	0	0
miR6248-y	19	GATATTTGCGGATGGAGGT	1	0	0	0	0	0	1	0	0	0	0	0	0	0	0	0	0	0	0
miR3440-x	18	ATTTCTTGGCCCATTCAC	1	0	0	0	0	0	1	0	0	0	0	0	0	0	0	0	0	0	0
miR6029-y	19	GTTGGGGATGTGATTTAAG	1	0	1	0	0	0	0	0	0	0	0	0	0	0	0	0	0	0	0
miR2595-y	18	CTTTTCTTCTTTCTGTCT	1	0	0	0	0	0	0	0	0	0	0	0	0	0	0	0	0	1	0
miR8005-x	18	AATTTTGAATTCTAAACC	1	0	0	0	0	0	0	0	0	0	0	0	0	0	0	1	0	0	0
miR5240-x	19	AAAAATGGTGGACTTGAGA	1	0	1	0	0	0	0	0	0	0	0	0	0	0	0	0	0	0	0
miR5561-y	18	TTTCTATCTCTCTCTCAA	1	0	0	0	0	0	0	0	0	0	0	1	0	0	0	0	0	0	0
miR6187-x	18	ATGAACAGGTTCGGCATC	1	0	0	0	0	0	0	0	0	0	0	1	0	0	0	0	0	0	0
miR8167-y	18	ATGAGGAGATGGTGGGGA	1	0	0	0	0	0	0	0	0	1	0	0	0	0	0	0	0	0	0
miR870-y	19	AATTTGGTGTTCCTTCGGT	1	0	0	0	0	0	0	0	0	0	0	1	0	0	0	0	0	0	0
miR8640-y	18	TTTCTGCCAGTGCTCTGA	1	0	0	0	0	0	0	0	0	0	0	0	0	0	1	0	0	0	0
miR8166-x	18	AGATTGTAGACAGTTTCT	1	0	0	1	0	0	0	0	0	0	0	0	0	0	0	0	0	0	0
miR2937-y	18	GAGCTCTTGAAAGAGTCA	1	0	0	0	0	0	0	0	1	0	0	0	0	0	0	0	0	0	0
miR2119-y	18	AAAGGGAGTTGTTGGAGA	1	0	0	0	0	0	0	0	0	0	0	0	0	0	0	1	0	0	0
miR5490-y	18	GGGATTTTTTTTTAGGAC	1	0	0	0	0	0	0	0	0	0	0	0	0	0	0	0	0	1	0
miR5073-x	24	GTTTGGTGAATCGGAAACAATTTT	1	0	0	0	0	0	0	0	0	0	0	0	0	1	0	0	0	0	0
miR5149-y	18	GGAGGTGCTGTGAGGATT	1	0	0	0	0	0	0	0	0	0	0	0	0	0	0	0	0	0	1
miR919-x	18	CAGGAGGACATGGCAACT	1	0	0	0	0	0	0	1	0	0	0	0	0	0	0	0	0	0	0
miR7122-x	18	AGAGAAACCACTGTCGAA	1	0	0	0	0	0	0	0	0	0	0	0	0	0	0	0	0	0	1
miR7757-y	18	AGTTGAATGTTTAGTCTA	1	0	0	0	0	0	0	0	0	0	0	0	0	1	0	0	0	0	0
miR4249-x	18	TTGAGAAGTTGAGGTAGG	1	0	0	0	0	0	0	0	0	0	0	0	0	1	0	0	0	0	0
miR919-y	18	TCGAGATGCTGACATAGA	1	0	0	0	0	0	0	0	0	0	1	0	0	0	0	0	0	0	0
miR2630-x	21	TTTGGTTTTGGTCTTTGGTAG	1	0	0	1	0	0	0	0	0	0	0	0	0	0	0	0	0	0	0
miR3513-x	18	TTCTCAGTTTGGCATCTG	1	0	1	0	0	0	0	0	0	0	0	0	0	0	0	0	0	0	0
miR8131-x	18	GTCAGCTGAGTTGAGTTG	1	0	0	0	0	0	0	0	0	0	0	0	0	0	0	0	0	1	0
miR8592-y	19	ATCTGATGAACTCATCCCT	1	0	0	0	0	1	0	0	0	0	0	0	0	0	0	0	0	0	0
miR8600-y	18	ATGCAGATGACGTCAAAC	1	0	0	0	0	0	0	0	1	0	0	0	0	0	0	0	0	0	0
miR3516-x	18	GGTGAGAGTGACAGAAGT	1	0	0	0	0	0	0	0	0	0	0	0	0	0	0	0	1	0	0
total			73847074
