# Supplementary material for: Small RNA and Degradome Sequencing in Floral Bud Reveal Roles of miRNAs in Dormancy Release of Chimonanthus praecox
Source: Int J Mol Sci. 2023 Feb 20;24(4):4210. doi: 10.3390/ijms24044210 (PMC9964840; doi:10.3390/ijms24044210)
Supplement: Supplementary file 1 [file ijms-24-04210-s001.zip › Table S3. The pre-miRNAs of known miRNAs identified in wintersweet floral buds.xlsx]

## Sheet: Table S3
Table S3. The pre-miRNAs of known miRNAs identified in wintersweet floral buds
mature_id	hairpin_id	genomic_id	hairpin_start	hairpin_end	hairpin_strand	hairpin_length(nt)	hairpin_energe(kcal/mol)	hairpin_GC	hairpin_MFEI	mature_seq	mature_length(nt)	mature_arm	hairpin_seq	hairpin_struct
miR384-x	known-m0001	Unigene0015329	213	304	+	92	-34.6	46.74	0.8	TTGGCATTCTGTCCACCTCC	20	5p	catagccattTTGGCATTCTGTCCACCTCCaccaaaaacccagtacccaaaaatcaaaattggaggcggccaggatgccaaattagctctgt	((.(((...((((((((((((.((.((((((.............................)))))).)).))))))))))))...))).)).
miR167-x	known-m0002	Unigene0024977	112	212	-	101	-43.2	42.57	1	TGAAGCTGCCAGCATGATCTGA	22	5p	caccgatggtTGAAGCTGCCAGCATGATCTGAttttcatcaaccctacaatcctctctcaaggaaaaattcagatcatttggcagtttcaactgttgatgg	((.(((((((((((((((((((.(((((((((((((..............((((......)))))))).)))))))))))))))))))))))))))).)).
miR167-x	known-m0003	Unigene0024978	295	395	-	101	-43.2	42.57	1	TGAAGCTGCCAGCATGATCTGA	22	5p	caccgatggtTGAAGCTGCCAGCATGATCTGAttttcatcaaccctacaatcctctctcaaggaaaaattcagatcatttggcagtttcaactgttgatgg	((.(((((((((((((((((((.(((((((((((((..............((((......)))))))).)))))))))))))))))))))))))))).)).
miR854-x	known-m0004	Unigene0025522	462	704	+	243	-69.3	43.62	0.65	GATGAGGAAAGTGAAGAGGAGGA	23	5p	ccatgatgacGATGAGGAAAGTGAAGAGGAGGAagaggacgacgagggcgacgactgaacttgacttgcataaatcttttgtggcttggtggtagagccgtcttggccatcaattgtaggttgtgtaagatcatatgttaggttacaagtggttccctttgcaaaatcatgcctgcttttgcagctactatgctccatcttaggtgattgcatatttcttcgctatatttatcctttttgtgc	.(((((.((.((((((...((((((((((..............(((((.(((.((((((((((((((((((((..(..((((((((.((((((...)))).)).))))).)))..)....))))))))........)))))))).).))).)))))))).(((......)))((((....))))....(((((..((((...))))...)))))))))))))))...)))))).)).))))).
miR166-y	known-m0005	Unigene0036931	205	315	-	111	-50.5	46.85	0.97	TCGGACCAGGCTTCATTCCCC	21	3p	attaggttgcggggactgtcgtctggctcgaggtcaaatagttatttcctctcaaattaccaatttgatactaggtgaccTCGGACCAGGCTTCATTCCCCtcaaccaaca	....(((((.(((((.((..((((((.(((((((((..((((.........(((((((...))))))).))))..))))))))).))))))..)).))))).)))))....
miR166-y	known-m0006	Unigene0036932	208	318	-	111	-50.5	46.85	0.97	TCGGACCAGGCTTCATTCCCC	21	3p	attaggttgcggggactgtcgtctggctcgaggtcaaatagttatttcctctcaaattaccaatttgatactaggtgaccTCGGACCAGGCTTCATTCCCCtcaaccaaca	....(((((.(((((.((..((((((.(((((((((..((((.........(((((((...))))))).))))..))))))))).))))))..)).))))).)))))....
miR168-y	known-m0007	Unigene0043459	165	264	-	100	-41.5	47	0.88	TCCCTACTTGCATCAACTGAA	21	3p	ctctctcgaaatcgcttggtgcaggtcgggactcgtttatcgattgtgatttcatttcctccaagcgatTCCCTACTTGCATCAACTGAAttcgagacct	...(((((((.(((.(((((((((((.((((.((((((.......(((....))).......)))))).)))).))))))))))).))).)))))))...
miR168-y	known-m0008	Unigene0043460	819	918	-	100	-41.5	47	0.88	TCCCTACTTGCATCAACTGAA	21	3p	ctctctcgaaatcgcttggtgcaggtcgggactcgtttatcgattgtgatttcatttcctccaagcgatTCCCTACTTGCATCAACTGAAttcgagacct	...(((((((.(((.(((((((((((.((((.((((((.......(((....))).......)))))).)))).))))))))))).))).)))))))...
miR164-x	known-m0009	Unigene0045556	365	509	-	145	-53.6	46.9	0.79	TGGAGAAGCAGGGCACGTGCA	21	5p	gcaaggagagtcgtgcaagaTGGAGAAGCAGGGCACGTGCAtgaccttctttaatacctctgtctctctctctcttagagaaagcaaaaagaaaggtaggctttcatgtgctcatcttctccatcatgcccatctcacctcatct	...(((.(((..(.(((.((((((((((..(((((((((...(.((((((((.......((.(((((.........))))).)).......))))).))))...)))))))))..)))))))))).))).)..))).))).....
miR164-y	known-m0009	Unigene0045556	365	509	-	145	-53.6	46.9	0.79	CATGTGCTCATCTTCTCCATC	21	3p	gcaaggagagtcgtgcaagatggagaagcagggcacgtgcatgaccttctttaatacctctgtctctctctctcttagagaaagcaaaaagaaaggtaggctttCATGTGCTCATCTTCTCCATCatgcccatctcacctcatct	...(((.(((..(.(((.((((((((((..(((((((((...(.((((((((.......((.(((((.........))))).)).......))))).))))...)))))))))..)))))))))).))).)..))).))).....
miR166-x	known-m0010	Unigene0046204	28	217	+	190	-71.5	44.74	0.84	GGAATGTTGTCTGGCTCGAGG	21	5p	aggaagcttttcctttgaggGGAATGTTGTCTGGCTCGAGGccacctctctctctctctctctttattttattttttcaaaatcttaatcggatccgatccattcagatcggaccttcgatgtagagattgagatcggtgttggagacctcggaccaggcttcattccccccaattttcaacttccattt	.(((((........(((.((((((((..((((((.(((((((((((..((((..(((((............................(((((((((((((......)))))))..))))))..)))))..))))..)))).....).)))))).))))))..)))))))).))).......)))))....
miR166-y	known-m0010	Unigene0046204	28	217	+	190	-71.5	44.74	0.84	TCGGACCAGGCTTCATTCCCC	21	3p	aggaagcttttcctttgaggggaatgttgtctggctcgaggccacctctctctctctctctctttattttattttttcaaaatcttaatcggatccgatccattcagatcggaccttcgatgtagagattgagatcggtgttggagaccTCGGACCAGGCTTCATTCCCCccaattttcaacttccattt	.(((((........(((.((((((((..((((((.(((((((((((..((((..(((((............................(((((((((((((......)))))))..))))))..)))))..))))..)))).....).)))))).))))))..)))))))).))).......)))))....
miR166-x	known-m0011	Unigene0046207	28	255	+	228	-78	40.79	0.84	GGAATGTTGTCTGGCTCGAGG	21	5p	aggaagcttttcctttgaggGGAATGTTGTCTGGCTCGAGGccaccagtctctctacatacttatctatcaatctgtgtaattgatctgacccatcaatctagaggtttagattaatgctcttctgtcatatgataagatgcgatctgttaatattgagtgtggagatgagattaatattagtgacgtcggaccaggcttcattccccccaaatttcagcttccattt	.(((((((.....((((.((((((((..((((((.((((.(.(((.(((((((((.((((((((..(((.(((.......((((((((((.((.((......)))).))))))))))(((((..((((....))))))).)).....))).))).)))))))).))).)))))).......))).).)))).))))))..)))))))).))))....)))))))....
miR166-y	known-m0011	Unigene0046207	28	255	+	228	-78	40.79	0.84	TCGGACCAGGCTTCATTCCCC	21	3p	aggaagcttttcctttgaggggaatgttgtctggctcgaggccaccagtctctctacatacttatctatcaatctgtgtaattgatctgacccatcaatctagaggtttagattaatgctcttctgtcatatgataagatgcgatctgttaatattgagtgtggagatgagattaatattagtgacgTCGGACCAGGCTTCATTCCCCccaaatttcagcttccattt	.(((((((.....((((.((((((((..((((((.((((.(.(((.(((((((((.((((((((..(((.(((.......((((((((((.((.((......)))).))))))))))(((((..((((....))))))).)).....))).))).)))))))).))).)))))).......))).).)))).))))))..)))))))).))))....)))))))....
miR396-x	known-m0012	Unigene0046431	539	662	-	124	-46.6	40.32	0.93	TTCCACAGCTTTCTTGAACTT	21	5p	cttcatgctcTTCCACAGCTTTCTTGAACTTggatagtgtccacatgattgaattggaggttgtctattcatcatcttccactctttatttcaagttcatgaaagctgtgggaaaccatgttgg	(..((((...(((((((((((((.((((((((((.((((.....(((((.((((.(((.....))))))))))))....))))......)))))))))).)))))))))))))...))))..).
miR396-x	known-m0013	Unigene0046432	369	492	-	124	-46.6	40.32	0.93	TTCCACAGCTTTCTTGAACTT	21	5p	cttcatgctcTTCCACAGCTTTCTTGAACTTggatagtgtccacatgattgaattggaggttgtctattcatcatcttccactctttatttcaagttcatgaaagctgtgggaaaccatgttgg	(..((((...(((((((((((((.((((((((((.((((.....(((((.((((.(((.....))))))))))))....))))......)))))))))).)))))))))))))...))))..).
miR160-x	known-m0014	Unigene0058057	340	440	-	101	-52.4	54.46	0.95	TGCCTGGCTCCCTGTATGCCG	21	5p	aaatgggttaTGCCTGGCTCCCTGTATGCCGcacatggagatcgatctctttaatgatcggctgctgtgagtggcgtgcgaggggccaagcatactctctc	....((((.((((.(((((((.((((((((((.(((((((.((((((........)))))))).))))).)))))))))).))))))).))))))))....
miR162-y	known-m0015	Unigene0063337	744	891	+	148	-50.2	50	0.68	TCGATAAACCTCTGCATCCGG	21	3p	agaaggaagaatgtgttgtggtgtcttcggacgcagcggtttaccgaccaattcctggcctgtggcgcttgcttgatggattggttgctctgcattgaaagatgaaacaggaatcggTCGATAAACCTCTGCATCCGGttttcctgca	...(((((((................(((((.((((.((((((.(((((.(((((((.((...(((....)))....)).((.(((..((......))..))).)).))))))).))))).)))))).)))).))))))))))))...
miR167-x	known-m0016	Unigene0066713	209	326	-	118	-54.7	44.92	1.03	TGAAGCTGCCAGCATGATCTGA	22	5p	gatggtgcaccattaatggtTGAAGCTGCCAGCATGATCTGAttttcttcaagccaaacatgtttcatggaaaaatcagatcatgtggcagtttcacccgttcatggcgggcacagaa	....((((.((((.(((((.(((((((((((.((((((((((((((((..((((.......))))...)).))))))))))))))))))))))))).))))).))))...))))....
miR167-y	known-m0016	Unigene0066713	209	326	-	118	-54.7	44.92	1.03	AGATCATGTGGCAGTTTCACC	21	3p	gatggtgcaccattaatggttgaagctgccagcatgatctgattttcttcaagccaaacatgtttcatggaaaaatcAGATCATGTGGCAGTTTCACCcgttcatggcgggcacagaa	....((((.((((.(((((.(((((((((((.((((((((((((((((..((((.......))))...)).))))))))))))))))))))))))).))))).))))...))))....
miR166-x	known-m0017	Unigene0075365	95	255	+	161	-55.4	49.69	0.69	GGAATGTTGTCTGGCTCGAGG	21	5p	ggaagctttttccattgaggGGAATGTTGTCTGGCTCGAGGccaccaacatcgctcttcccatccaatccttctatcacaaatttctatctgttcttctgatcagtcgatgcaggtgacgtcggaccaggcttcattccccccaaatttctgcttcctccc	((((((........(((.((((((((..((((((.((((.(.((((..(((((............................((....))(((.((....)).))).)))))..)))).).)))).))))))..)))))))).)))......))))))....
miR166-y	known-m0017	Unigene0075365	95	255	+	161	-55.4	49.69	0.69	TCGGACCAGGCTTCATTCCCC	21	3p	ggaagctttttccattgaggggaatgttgtctggctcgaggccaccaacatcgctcttcccatccaatccttctatcacaaatttctatctgttcttctgatcagtcgatgcaggtgacgTCGGACCAGGCTTCATTCCCCccaaatttctgcttcctccc	((((((........(((.((((((((..((((((.((((.(.((((..(((((............................((....))(((.((....)).))).)))))..)))).).)))).))))))..)))))))).)))......))))))....
miR166-x	known-m0018	Unigene0075366	95	260	+	166	-55.94	50.6	0.67	GGAATGTTGTCTGGCTCGAGG	21	5p	ggaagctttttccattgaggGGAATGTTGTCTGGCTCGAGGccaccaacatcggattcttcccgtccaatccttctatcacaaaattctctctcttcttcttctgatcagtcgatgcaggtgccgtcggaccaggcttcattccccccaatttctgcttcctccct	((((((.......((((.((((((((..((((((.(((((((.(((..((((((..((..............................................))....))))))..)))))).)))).))))))..)))))))).))))....)))))).....
miR166-y	known-m0018	Unigene0075366	95	260	+	166	-55.94	50.6	0.67	TCGGACCAGGCTTCATTCCCC	21	3p	ggaagctttttccattgaggggaatgttgtctggctcgaggccaccaacatcggattcttcccgtccaatccttctatcacaaaattctctctcttcttcttctgatcagtcgatgcaggtgccgTCGGACCAGGCTTCATTCCCCccaatttctgcttcctccct	((((((.......((((.((((((((..((((((.(((((((.(((..((((((..((..............................................))....))))))..)))))).)))).))))))..)))))))).))))....)))))).....
miR530-x	known-m0019	Unigene0091569	117	238	-	122	-50.47	43.44	0.95	TGCATTTGCACCTGCACCTGT	21	5p	tgtgtatatcTGCATTTGCACCTGCACCTGTaactctacccattttccttactcatttctcttcaacttttttcaatcatgcgggaaagatgcaggtgcaggtgtaggtgcagacaaacacc	.((((...((((((((((((((((((((((((..(((.(((.........................................)))..)))))))))))))))))))))))))))...)))).
miR408-x	known-m0020	Unigene0092678	29	132	+	104	-54.7	55.77	0.94	GTAGGGAACAGGCAGAGCATG	21	5p	agaggcacagGTAGGGAACAGGCAGAGCATGggagagattctgcaacagatccctcattgttgctgtccttcccatgcactgcctcttccctggctctcccttc	.((((...((.(((((((.((((((.(((((((((.(((...(((((((........))))))).))).))))))))).)))))).))))))).))...)))).
miR6281-x	known-m0021	Unigene0098013	502	782	-	281	-68	39.15	0.62	AGAGAGAGAGAGAGTGAGAG	20	5p	agagagagagAGAGAGAGAGAGAGTGAGAGgactagaactagaaataccgttttgcacatttcattttcatgcaagaagaaatttctgatctttttcagacagatatcgttcaatggtggaaaactcccaagacaacctgcagctgccttaaacttcaagagtccacatgaatgctctgaaataggtattgagcattatgcaaatgtgcatcagcttcttcatttgacgcatcaagagatcgaagatccttaatcacatcttgccatttctcaatcttttc	.((((((..((((((..(.(((((((((((((.......(((((((....(((((((.............)))))))....)))))))((((.(((((((.......((((((...(((((...(((............((....))............)))))))).)))))).))))))).)))).((((((((.........)))).))))((((.((.(((((....))))).))..)))).)))))..)))).)))).)..))))))..)))))).
miR172-y	known-m0022	Unigene0103215	134	247	-	114	-46	37.72	1.07	AGAATCTTGATGATGCTGCAT	21	3p	ctgtttgctggtgtagcatcattaagattcacaacattcaaagagaattcttaagtggtgtgtaaagacaactcgcatgtatgAGAATCTTGATGATGCTGCATcggcaatata	....((((((((((((((((((((((((((.((((((...((((....))))..(((((((......)).)).))))))).)).))))))))))))))))))))))))))....
miR390-x	known-m0023	Unigene0104417	25	148	+	124	-57.4	41.94	1.1	AAGCTCAGGAGGGATAGCGCC	21	5p	agaatctgtaAAGCTCAGGAGGGATAGCGCCatggatgatagagaaatgggttacagtatacaaatggcaatgcaagtttccattcatcaatggcgctatccatcctgagttctatggtttctt	((((.(((((.(((((((((.((((((((((((.(((((..(.(((((..((.....(((....))).....))..))))))..))))).)))))))))))).))))))))).))))).)))).
miR166-x	known-m0024	Unigene0104473	121	241	-	121	-55.3	46.28	0.99	GGAATGTTGTCTGGCTCGAGG	21	5p	aaggttgtggGGAATGTTGTCTGGCTCGAGGtcatgtggaagattaatgggccgagcttataatcaataaatcgatcgaattctagatgtcctcggaccaggcttcattcctctcaaccag	..(((((.((((((((..((((((.((((((.(((.((((((((((.(((((...))))))))))...............))))).))).)))))).))))))..)))))))).)))))..
miR166-x	known-m0025	Unigene0104474	279	399	-	121	-55.3	46.28	0.99	GGAATGTTGTCTGGCTCGAGG	21	5p	aaggttgtggGGAATGTTGTCTGGCTCGAGGtcatgtggaagattaatgggccgagcttataatcaataaatcgatcgaattctagatgtcctcggaccaggcttcattcctctcaaccag	..(((((.((((((((..((((((.((((((.(((.((((((((((.(((((...))))))))))...............))))).))).)))))).))))))..)))))))).)))))..
miR396-y	known-m0026	Unigene0106753	89	235	+	147	-48.9	36.05	0.92	CTCAAGAAAGCTGTGGGAAA	20	3p	ttccattcatgtgaaaaaaaaaaaatcggagcatgcttttccacggctttcttgaacttagtactcagatccatttctttcatttgaatccttctctaaatagatcttagtacaaagCTCAAGAAAGCTGTGGGAAAacatgatggg	.(((((.(((((........................(((((((((((((((((((.(((.(((((.(((((.((((..(((....))).........)))).))))).))))).))).)))))))))))))))))))))))))))))
miR2950-x	known-m0027	Unigene0110574	106	185	-	80	-42	46.25	1.14	TTCCATCTCTTGCACACTGGA	21	5p	ttatgatatgTTCCATCTCTTGCACACTGGAgcagcaatcaggatatgggccggtgtgcaagatgtggaatatgtcacca	...(((((((((((((.(((((((((((((..((............))..))))))))))))).)))))))))))))...
