# Supplementary material for: Small RNA and Degradome Sequencing in Floral Bud Reveal Roles of miRNAs in Dormancy Release of Chimonanthus praecox
Source: Int J Mol Sci. 2023 Feb 20;24(4):4210. doi: 10.3390/ijms24044210 (PMC9964840; doi:10.3390/ijms24044210)
Supplement: Supplementary file 1 [file ijms-24-04210-s001.zip › Table S4. The novel miRNAs identified in wintersweet floral buds.xlsx]

## Sheet: Table S4
Table S4. The novel miRNAs identified in wintersweet floral buds
id	length	seq	total	FB.NOV-1_count	FB.NOV-2_count	FB.NOV-3_count	FB150-1_count	FB150-2_count	FB150-3_count	FB300-1_count	FB300-2_count	FB300-3_count	FB450-1_count	FB450-2_count	FB450-3_count	IB570-1_count	IB570-2_count	IB570-3_count	nF16-1_count	nF16-2_count	nF16-3_count
novel-m0078-3p	22	ATTTCGAGACTGCTCAAGCCCT	609011	17761	52611	49800	56586	51147	34975	15349	28031	39306	40709	42457	69137	17189	38361	35852	6774	5724	7242
novel-m0148-3p	22	TTTCCGAGAGGGCTTAAACCAC	125410	3103	5538	6696	8987	8719	7234	6303	6333	9813	6469	7075	11935	4834	7271	8400	5712	5121	5867
novel-m0149-3p	21	TTGGGATTGGGCTTGGGCTTT	69774	1162	1809	2015	5394	4427	3288	3354	4022	7073	4653	4713	6843	3898	6361	6501	1609	1306	1346
novel-m0033-5p	23	TTCATGGACGTTGATAAGATCCT	38392	197	853	783	4019	3548	4220	1176	1981	3114	3387	2426	7902	540	1168	1199	561	663	655
novel-m0151-3p	22	TTTCTATCTTCGACATAGCGCG	34067	625	2344	2196	2853	2452	1705	1127	1353	2850	1492	2657	4057	1062	2101	2592	948	888	765
novel-m0182-5p	23	TCGGACGCAGCGGTTTACCGACC	13337	412	1190	1466	1108	1116	1109	414	659	878	765	592	886	189	318	304	820	457	654
novel-m0296-5p	22	TAGGCACTCGATCTTAATGTTC	12797	383	653	625	956	938	674	613	660	1101	865	950	1326	813	1083	1138	6	4	9
novel-m0148-5p	20	GGCTTGAGTCGATCGGAGAA	12793	276	346	366	999	1158	839	641	801	884	1738	999	1051	536	425	339	430	338	627
novel-m0010-3p	23	CCTTTCTTCACATCTCTCTGGCC	8801	178	491	524	555	503	327	486	629	701	698	348	605	560	598	697	278	237	386
novel-m0011-3p	23	CCTTTCTTCACATCTCTCTGGCC	8801	178	491	524	555	503	327	486	629	701	698	348	605	560	598	697	278	237	386
novel-m0198-3p	22	TAGTCGAATCAGCGAAAGAGTC	8438	143	448	470	628	484	376	269	371	651	394	514	961	272	729	848	180	343	357
novel-m0149-5p	21	AGCTCTAGTTCACTCTCAACC	7449	73	220	218	536	465	289	401	537	866	570	514	869	369	507	633	99	151	132
novel-m0151-5p	22	CGCTGTATCGGACGTAGAAATA	6448	343	458	422	486	387	411	452	360	514	435	344	580	234	303	266	223	124	106
novel-m0160-5p	21	TCGATGTAGATGTCTGGGTCT	3528	47	165	166	282	233	161	139	220	348	176	157	293	177	458	428	26	30	22
novel-m0242-5p	21	CGGTAACGAACATCCTGTGGA	3132	107	185	206	212	187	164	117	144	177	141	115	175	125	239	174	195	218	251
novel-m0018-5p	21	CCATGTTGTATGGCCGAACCC	2967	84	217	234	226	179	156	171	150	182	133	116	207	161	100	96	299	107	149
novel-m0077-5p	23	GACATGTGGCATGTTTGTGGGGC	2904	69	365	470	298	343	277	76	121	175	197	97	133	11	26	24	52	68	102
novel-m0208-5p	21	TTTGTAAAAATCGGTCGAGAA	2858	134	170	160	209	184	171	168	159	259	143	95	225	94	176	184	105	98	124
novel-m0029-5p	21	CCATGTTGTATGGCCGAACCC	2554	80	162	190	183	159	136	152	127	149	100	106	172	158	94	87	281	96	122
novel-m0070-5p	21	CCATGTTGTATGGCCGAACCC	2038	58	128	149	140	121	109	128	113	109	86	79	138	136	78	66	222	81	97
novel-m0069-5p	21	CCATGTTGTATGGCCGAACCC	2038	58	128	149	140	121	109	128	113	109	86	79	138	136	78	66	222	81	97
novel-m0078-5p	21	TGTTTGAGTAGTTTGGAATGA	2003	42	106	107	237	170	217	85	121	149	121	145	261	64	53	79	14	16	16
novel-m0178-5p	23	ATTGATGGGATAAATGACTTAGA	1871	59	162	107	147	147	80	66	75	160	96	95	182	72	132	144	32	61	54
novel-m0010-5p	21	CGAGAGAGATGAAGAAAGGAG	1845	71	51	77	141	91	62	80	84	80	99	45	101	321	211	213	42	33	43
novel-m0011-5p	21	CGAGAGAGATGAAGAAAGGAG	1845	71	51	77	141	91	62	80	84	80	99	45	101	321	211	213	42	33	43
novel-m0270-5p	22	TAGGGAACCCTTGATCAGCATG	1741	54	91	131	137	125	80	77	106	148	76	66	105	98	118	142	65	57	65
novel-m0082-5p	21	GCTGTGCTATCTCTCTTCCTC	1734	27	73	120	117	164	117	21	118	61	412	192	107	8	27	9	35	18	108
novel-m0248-5p	21	TGAATAGTGCACATGTAATCT	1648	74	72	75	99	60	53	56	86	172	124	87	208	105	141	157	26	18	35
novel-m0246-5p	21	TGAATAGTGCACATGTAATCT	1648	74	72	75	99	60	53	56	86	172	124	87	208	105	141	157	26	18	35
novel-m0250-5p	21	TGAATAGTGCACATGTAATCT	1648	74	72	75	99	60	53	56	86	172	124	87	208	105	141	157	26	18	35
novel-m0252-5p	23	GACGGGGGAAATGAAAGCAGAAT	1631	121	77	74	75	50	49	83	110	97	53	23	58	31	61	58	161	185	265
novel-m0060-5p	22	AAATGATAAGGTTCAGTGGACT	1572	1	99	101	83	87	45	12	101	92	67	41	68	11	66	54	74	200	370
novel-m0194-3p	21	TTTTCCGGGGAAGTGCTTTCC	1502	111	29	59	80	73	54	84	65	133	70	56	132	147	122	162	53	26	46
novel-m0141-5p	23	CCATGTGGGCTAGTGTCAATACG	1347	39	99	80	83	105	73	117	98	147	94	65	123	33	37	41	40	26	47
novel-m0198-5p	21	CTCTTTCGTTGTTCCACTGCT	1341	31	57	74	78	90	54	47	64	128	115	80	131	72	91	98	51	38	42
novel-m0037-5p	23	TCTATTTGGGGCTCACTTTGACT	1226	43	129	113	116	68	66	41	77	82	59	46	58	22	42	75	63	45	81
novel-m0225-3p	22	TGGCCAATGATGAGAAACAAAA	1092	29	45	49	65	54	96	101	50	63	50	48	86	27	33	31	77	100	88
novel-m0224-3p	21	TTCTTATGTGGAGAATTCACT	1051	13	57	72	79	51	101	7	66	82	117	64	111	10	49	30	18	52	72
novel-m0243-5p	23	TAAATGTGAAATTTTGAGGGCCT	968	15	57	56	62	42	41	49	65	81	58	32	103	29	95	95	19	28	41
novel-m0126-5p	21	CAGCTTTCTTGAACTTGGATA	956	8	37	35	58	60	28	25	39	76	39	39	52	74	139	122	42	44	39
novel-m0127-5p	21	CAGCTTTCTTGAACTTGGATA	956	8	37	35	58	60	28	25	39	76	39	39	52	74	139	122	42	44	39
novel-m0152-5p	22	AGCGGTCGGGATACGGAAGGGA	924	45	45	44	58	73	56	51	38	81	64	38	64	59	72	60	22	24	30
novel-m0093-3p	22	CTACCCAGTTGATGCCCATAGG	914	70	71	93	69	68	70	28	74	82	72	31	60	5	25	17	18	37	24
novel-m0120-3p	21	TTTTCCCAAGAGAGTGCTTCC	804	44	13	12	37	24	15	56	42	51	56	47	61	67	133	121	10	6	9
novel-m0146-3p	21	ATGCTTCTTCAGTTGTTCATC	766	33	25	24	33	26	33	36	33	91	20	65	90	52	77	77	19	22	10
novel-m0105-3p	23	CTTGACGAGCGGTATACCGGTGG	740	14	10	14	39	21	19	33	25	60	19	16	16	117	134	175	7	11	10
novel-m0315-5p	21	CCACTTTGGATGGCCGAACCC	631	20	41	31	34	30	24	51	33	25	27	19	37	37	48	36	59	40	39
novel-m0017-5p	21	CCACTTTGGATGGCCGAACCC	631	20	41	31	34	30	24	51	33	25	27	19	37	37	48	36	59	40	39
novel-m0106-5p	21	TGTTGGGATATCTAGAATAGA	617	22	27	24	23	14	24	57	36	41	28	16	50	72	69	79	21	2	12
novel-m0190-5p	21	CCACTTTGGATGGCCGAACCC	610	20	37	28	34	27	22	51	33	25	26	19	37	37	48	36	53	38	39
novel-m0026-5p	22	TGGAGAAGGATGGAGTAGAGAG	576	42	53	37	81	65	43	11	27	16	39	35	73	13	8	9	8	3	13
novel-m0303-5p	21	TAATAGTACAACTTGAACTCC	569	13	37	20	43	42	41	11	29	40	47	49	65	20	45	28	12	15	12
novel-m0197-5p	22	TAGCACTGATCTTTGATTGTAG	523	16	30	20	40	51	37	19	21	29	42	39	50	27	29	29	12	12	20
novel-m0159-5p	22	CAAACTTTGGTTTGTGGGGCCC	514	17	16	21	28	22	18	17	29	33	49	27	30	36	33	23	38	22	55
novel-m0221-5p	23	CAACTCTACGAAACAATGTTACT	504	12	32	66	39	50	46	11	22	42	41	42	60	0	7	9	8	7	10
novel-m0115-5p	21	ATATGTGGACTTGGATTGGGA	418	39	39	28	42	22	7	24	14	23	30	13	28	33	25	30	3	6	12
novel-m0023-5p	21	TGATGTTGCACATGTTAAAAA	409	3	14	25	28	23	11	5	38	47	32	29	34	9	50	30	8	12	11
novel-m0264-3p	23	TCATAGAGGCACTTGTTGATGAA	385	7	21	18	39	27	29	17	36	33	37	15	33	3	4	15	19	19	13
novel-m0080-3p	21	TCCGTGTCGGATACGCACCCG	379	36	16	22	30	42	28	28	14	20	6	13	27	25	16	8	19	10	19
novel-m0285-3p	21	TCCGTGTCGGATACGCACCCG	379	36	16	22	30	42	28	28	14	20	6	13	27	25	16	8	19	10	19
novel-m0201-3p	22	CCTTGGGTCACTGGCCATTCGC	368	37	8	27	41	22	20	12	16	41	14	21	22	2	10	14	15	22	24
novel-m0202-3p	22	CCTTGGGTCACTGGCCATTCGC	368	37	8	27	41	22	20	12	16	41	14	21	22	2	10	14	15	22	24
novel-m0128-3p	21	AAGAGGAGGAAAAGCAGGTGA	341	0	2	7	6	7	5	13	6	7	7	5	6	84	81	100	1	3	1
novel-m0262-3p	21	TTCTGCGACCGGTCCTGCACT	328	0	0	6	5	3	6	7	18	10	3	2	0	26	38	40	23	37	104
novel-m0184-3p	23	CTGAGTTTTTGTATCGGCCGAGA	327	22	16	36	36	19	18	32	21	33	12	17	28	4	6	4	3	8	12
novel-m0164-5p	22	AGAGGGTGGGTGAAGTTTCACC	322	120	35	29	8	13	8	9	5	6	3	1	6	8	2	6	27	19	17
novel-m0111-5p	21	TGAGAATGAGAGAAAATAGAA	320	13	36	51	34	32	17	11	12	23	3	10	13	12	9	13	5	16	10
novel-m0177-3p	21	AAAAGGGGAGAGAGCAGTAAA	317	10	10	9	17	14	14	12	42	21	18	11	17	46	42	27	4	1	2
novel-m0152-3p	21	CCCACCGATCCCAACCTCTCC	307	17	15	17	26	17	7	5	31	20	34	17	20	8	14	15	19	13	12
novel-m0104-3p	20	ATGGACCGGGTGTTGTGGGC	290	11	9	11	18	13	18	29	26	30	32	16	10	5	7	9	14	7	25
novel-m0358-3p	21	AAGCTGTGGGAGAATACCGAG	279	6	13	22	25	32	19	7	6	18	19	9	18	17	21	27	6	10	4
novel-m0223-5p	21	TGGAGAGTTAGAGCACGTGCG	274	11	10	5	17	19	14	15	21	34	25	9	17	6	31	22	12	1	5
novel-m0261-5p	21	TGCGGGAGAGACAGGAGACCT	265	5	11	15	19	24	11	4	23	19	22	7	10	23	19	14	10	12	17
novel-m0356-5p	21	AACTTAGTACTCAGATCCATT	258	2	10	5	11	5	1	11	3	16	8	15	18	29	48	50	9	12	5
novel-m0254-3p	22	CGAAGTAGCCATGGTGGAAGCA	251	17	16	17	13	18	4	6	10	14	18	7	24	6	27	34	4	15	1
novel-m0328-5p	23	CGCAGATGATGATAAGTTTGAAT	211	5	12	10	7	13	16	3	3	37	23	17	29	7	14	2	0	7	6
novel-m0290-3p	23	TATATACACACCATTTGAGCATG	210	12	21	17	22	10	22	9	8	17	11	7	13	3	5	12	2	9	10
novel-m0085-5p	23	CCGAAAATTACTTTGATTGAATC	196	15	15	25	10	26	10	7	4	7	12	18	8	1	1	3	15	4	15
novel-m0099-3p	21	TTACTCTTCTTTCCTTGCATC	193	36	18	4	22	14	9	4	7	14	8	8	9	1	7	21	5	1	5
novel-m0034-3p	22	AGAACGTAAGCTAGTGATGCTT	188	0	2	13	4	3	2	1	9	13	0	1	4	1	4	4	19	52	56
novel-m0321-3p	21	AGCTGTAATGACCACTCTCTC	181	0	11	17	14	9	10	3	13	6	6	11	17	13	10	11	7	14	9
novel-m0272-5p	23	CGTCGAATGACTATTCATTTATT	179	2	8	14	29	17	19	0	12	13	19	4	16	3	10	4	1	4	4
novel-m0256-5p	23	TCCGAGTACCGACAACTAGTAGC	177	7	17	15	14	18	11	4	9	5	8	6	18	2	7	11	3	5	17
novel-m0277-3p	23	CTGCAACGGAGAGAGGGTCGTGG	169	6	9	10	15	7	8	13	4	12	2	7	8	15	28	25	0	0	0
novel-m0342-3p	21	ATTCCTCTCTTCTCCTTCAGG	163	0	11	7	8	9	6	0	9	13	17	5	16	0	5	2	22	12	21
novel-m0359-5p	21	TCATAGGTGGGCTCTACATGG	159	1	0	2	10	10	8	5	5	11	6	7	16	26	16	28	3	0	5
novel-m0337-3p	21	CTCTAAGAGGCTTGGACACCT	157	4	8	4	20	5	4	16	20	6	9	6	4	9	9	4	14	8	7
novel-m0027-5p	21	CAAAGCGGACAATATCACACT	156	3	8	8	10	7	10	3	9	17	13	20	12	0	8	6	8	6	8
novel-m0205-3p	22	GCAAGTGATGATAACATAGACA	153	2	6	7	13	4	13	8	9	19	6	11	16	0	5	1	8	16	9
novel-m0037-3p	24	TTCAAAGTGGGCTCCATATAGAGG	142	5	19	18	7	24	12	2	2	6	5	3	8	0	5	2	6	8	10
novel-m0032-3p	22	AGAGATGCTTAGAATATTCTAG	139	0	7	19	15	7	9	5	3	15	12	6	19	0	4	1	2	7	8
novel-m0135-5p	22	ATACATATCGTATCGGCCGATA	139	4	14	8	15	8	11	3	1	4	24	5	13	0	5	2	4	4	14
novel-m0196-3p	21	TGCTCGGAACTTGGCCTCGGT	139	9	10	3	6	18	7	7	2	0	22	9	9	3	13	3	12	3	3
novel-m0307-5p	21	TTTAATCAGATCGGACCGAGA	135	16	7	11	19	14	7	8	5	3	6	10	7	3	1	6	3	4	5
novel-m0266-3p	21	TTTAATCAGATCGGACCGAGA	135	16	7	11	19	14	7	8	5	3	6	10	7	3	1	6	3	4	5
novel-m0306-3p	21	TTTAATCAGATCGGACCGAGA	135	16	7	11	19	14	7	8	5	3	6	10	7	3	1	6	3	4	5
novel-m0064-3p	21	TTTAATCAGATCGGACCGAGA	135	16	7	11	19	14	7	8	5	3	6	10	7	3	1	6	3	4	5
novel-m0129-5p	21	GAGGATAGACAGGATACTGGA	135	1	4	6	17	8	5	15	3	13	6	8	15	6	0	0	15	8	5
novel-m0065-3p	21	TTTAATCAGATCGGACCGAGA	135	16	7	11	19	14	7	8	5	3	6	10	7	3	1	6	3	4	5
novel-m0022-3p	21	TTGGCCGTGATCTTTTATGAT	134	8	13	13	13	5	2	4	3	8	13	0	4	6	1	7	11	11	12
novel-m0047-5p	22	TCGGCCCTGAGAGCGATTCCCG	133	0	0	0	13	4	3	28	22	17	9	4	4	5	4	4	12	3	1
novel-m0299-5p	23	TGGGACTTGTTCGCTGGCCAACA	129	0	9	4	12	5	3	4	6	7	7	6	5	0	9	5	26	12	9
novel-m0138-5p	21	TCCCTTTCTGTCATCATCTGA	127	0	6	1	3	14	4	9	8	12	7	1	2	8	15	10	8	6	13
novel-m0008-3p	21	TCTGGAGGACAGCTCGATGGC	126	9	11	10	14	8	5	5	6	16	1	8	8	3	1	6	7	4	4
novel-m0141-3p	23	TATTGGTGCAGGCCCAAATGGGC	125	3	19	24	6	7	7	1	8	14	12	0	14	0	1	0	1	5	3
novel-m0255-5p	21	TTGGGCCGGGCCATGTGGGCC	121	5	3	6	10	15	6	3	9	4	8	4	8	3	5	6	7	10	9
novel-m0093-5p	22	TATGGGCGTCAAATAGGTAGTC	119	2	4	5	16	12	14	1	5	11	7	0	5	0	7	4	4	13	9
novel-m0264-5p	23	CATCAACCAACGTCCCTATGACT	119	0	11	4	7	9	2	7	12	17	6	10	12	3	4	5	3	4	3
novel-m0053-3p	21	TGTTGACTTGGTCGTTCGGAA	118	4	6	10	7	6	12	4	4	7	1	9	2	22	11	7	0	2	4
novel-m0035-3p	21	CCATGGTGTATGGCTGAACCC	117	11	1	4	4	7	3	6	7	6	0	6	12	2	3	14	20	3	8
novel-m0356-3p	21	ATAGATCTTAGTACAAAGCTC	117	4	8	8	12	5	6	9	6	9	11	3	11	3	12	5	1	4	0
novel-m0068-3p	21	TGGACCACCAAGCCCTTTTGG	115	12	3	6	9	16	8	4	1	12	3	3	3	2	10	11	1	4	7
novel-m0257-3p	21	TATGGATAGGGTTGTGAGATT	114	4	3	10	9	12	3	5	7	6	6	7	3	8	9	6	3	7	6
novel-m0235-3p	21	CCATAGTGCATGGCCGAACCC	108	2	3	5	18	8	7	5	3	1	7	5	11	1	13	9	5	2	3
novel-m0133-5p	22	CACCCAGATCTCGCACAGCTCC	108	0	2	1	5	17	14	5	8	4	8	10	6	7	12	3	0	2	4
novel-m0236-3p	21	CCATAGTGCATGGCCGAACCC	108	2	3	5	18	8	7	5	3	1	7	5	11	1	13	9	5	2	3
novel-m0168-3p	21	TATCTGGGCAATATATCAAAT	106	1	3	8	14	8	4	0	6	2	2	9	8	1	14	7	3	3	13
novel-m0332-5p	20	TGGTGGCCATGGACTTCATA	101	2	5	27	6	3	14	0	1	6	2	15	4	8	5	0	0	0	3
novel-m0042-3p	21	TCCGAGAGTTGAACCGTGCTC	100	3	14	8	8	11	4	1	3	0	8	2	7	1	3	0	4	12	11
novel-m0251-5p	22	TGAGGATGAAGAGGAGGATGAG	99	8	8	8	18	8	3	4	2	2	6	7	8	3	1	7	2	1	3
novel-m0249-5p	22	TGAGGATGAAGAGGAGGATGAG	99	8	8	8	18	8	3	4	2	2	6	7	8	3	1	7	2	1	3
novel-m0345-5p	21	CGACTGTATACTTTGGCTCCT	98	7	4	5	7	4	6	6	9	13	9	3	3	0	4	7	6	5	0
novel-m0112-5p	21	TGGTCCGGTTCTGATAACACT	96	3	4	1	2	3	5	8	11	7	18	2	4	5	5	7	2	3	6
novel-m0013-5p	23	TTCCGAGGATCAGTCAAACTATC	96	6	13	9	8	7	5	3	9	9	5	2	7	4	1	0	5	2	1
novel-m0309-3p	21	TTTTCCATGAAAGCTCTTTCC	89	0	1	7	8	5	4	3	4	7	3	5	6	3	14	14	0	3	2
novel-m0023-3p	21	TTTACCATTTGTAACATCACC	88	11	9	4	2	7	5	0	10	2	1	10	5	4	4	2	8	2	2
novel-m0077-3p	23	CCCACAAACATGCCATGTGTCCT	85	3	2	17	4	12	6	0	1	8	8	4	3	0	0	3	4	6	4
novel-m0044-5p	21	TGCGTATCGGCCAAGATATCT	84	6	17	11	9	6	7	0	3	4	1	2	4	1	0	5	6	2	0
novel-m0330-5p	23	ATTGTTGAGGTGCGAACGAGAGT	84	1	5	7	2	11	10	1	7	10	8	2	1	1	10	0	3	2	3
novel-m0108-5p	21	TAGCTCAACTGGTTGTCTCCT	83	1	1	3	9	7	7	3	1	3	2	7	6	6	4	0	10	6	7
novel-m0107-5p	21	TAGCTCAACTGGTTGTCTCCT	83	1	1	3	9	7	7	3	1	3	2	7	6	6	4	0	10	6	7
novel-m0169-3p	22	ATGATACATCGTCCCTTTGCAG	82	1	4	2	12	14	2	6	0	3	8	2	10	3	5	5	3	1	1
novel-m0052-3p	21	TCCCTTGGCTGTGGTTTCGCT	82	0	3	2	5	2	7	0	5	3	9	0	0	3	8	5	1	3	26
novel-m0237-5p	23	ATTTCCGTTCGATTTTTCTTGTT	82	1	7	7	24	6	1	6	6	7	1	3	3	0	1	7	0	0	2
novel-m0308-5p	23	ATGGGCATCCAAACAACAACGTT	81	9	4	2	4	8	2	3	3	7	2	13	10	4	1	2	2	4	1
novel-m0014-5p	21	CTCTAAGAGGCTTGGACACCT	81	0	3	1	9	3	4	11	3	6	2	1	0	7	5	3	12	5	6
novel-m0007-5p	22	CCAAAGTGGACAATATTGTGCT	78	1	12	14	8	7	8	2	1	10	5	1	2	0	1	4	0	2	0
novel-m0072-3p	21	TTTCAACCATTAAGATCAAGT	78	0	2	12	6	4	4	6	2	2	3	2	5	2	7	11	1	1	8
novel-m0186-3p	21	CGAGAGTCTCACGTCAGTTGT	78	0	0	0	2	4	2	4	0	9	0	1	3	15	21	12	2	2	1
novel-m0229-5p	23	AAGACGAGAAAACGGTCAGCTGT	77	2	1	6	1	3	6	3	12	11	1	2	7	1	4	10	1	3	3
novel-m0222-5p	21	CTATTTTGGTAAACTTGGCTC	77	0	0	0	0	1	2	7	5	3	5	3	4	16	7	19	3	1	1
novel-m0361-5p	21	AGCCGCATCGTGGGAATTACC	76	1	6	1	0	4	5	5	4	5	4	4	10	17	4	3	3	0	0
novel-m0342-5p	22	TGATGGAGAAGGATAGGAATTG	76	3	8	7	6	10	3	4	7	2	10	6	6	0	0	0	4	0	0
novel-m0122-5p	21	GGGTTGGATGGGTTTGAAAGA	76	14	9	2	6	5	6	2	3	4	7	2	1	2	0	1	4	2	6
novel-m0230-3p	23	CGGGATTTGGTCAAACTTGGTCA	75	10	5	6	5	6	6	3	5	6	5	2	10	1	0	0	4	0	1
novel-m0081-5p	23	TGTCATCCCGGACGAGTTCGTGA	75	1	2	7	7	13	1	4	13	5	5	4	3	1	0	0	4	1	4
novel-m0046-5p	21	TAGCTCAACTGGTTGCCTCCC	75	2	1	5	1	5	2	2	7	5	5	8	10	1	3	4	7	3	4
novel-m0124-5p	21	TTGGATTTATGGCTCAAAGCC	74	2	8	5	4	1	13	0	6	16	5	3	3	0	4	1	1	1	1
novel-m0173-3p	21	TTGGATTTATGGCTCAAAGCC	74	2	8	5	4	1	13	0	6	16	5	3	3	0	4	1	1	1	1
novel-m0298-5p	21	AGTCCCGGCCGTCGTGCATGA	74	2	5	6	12	8	2	6	2	2	4	4	1	5	5	5	3	0	2
novel-m0117-3p	22	GCTCGATGATGATTGATTTGCT	74	3	6	3	10	3	7	5	1	3	11	3	5	2	0	1	3	6	2
novel-m0119-3p	21	GCTGGACATGGACCCATCACT	71	0	0	3	2	0	2	0	6	3	4	7	1	28	11	2	0	2	0
novel-m0071-5p	21	TTGTGGGACCCACGCTTCTAG	69	0	2	4	4	12	2	1	0	11	3	2	8	4	6	2	4	2	2
novel-m0316-3p	21	TTTAATCAGATCGGACCGAGA	69	11	2	3	3	10	4	4	5	2	4	3	1	3	0	6	2	1	5
novel-m0139-3p	23	ATGAAATTGTGGCGCGTGGCATA	69	1	8	14	3	8	5	0	3	7	3	3	8	0	1	2	2	1	0
novel-m0183-3p	21	TTCCAAGAAAGTTCGTTCCTT	68	6	2	2	9	9	5	1	4	4	2	1	2	3	3	7	3	0	5
novel-m0036-5p	21	TTAGGTGGCGAATGGATGACA	68	0	0	2	3	2	0	1	5	10	2	5	7	5	9	11	0	1	5
novel-m0103-5p	22	CGATGTTTGTCGGGGTTCAATC	68	0	0	0	5	2	1	3	0	7	0	0	4	18	7	18	2	1	0
novel-m0185-5p	21	TCCAATGGTAGATCAAGTCAT	68	5	2	8	0	0	3	2	0	13	0	1	4	3	7	8	1	2	9
novel-m0004-3p	21	CGGTCCGGTTCTGATAACACT	66	0	5	1	6	3	0	2	10	3	2	5	1	3	5	1	12	5	2
novel-m0307-3p	21	CGGTCCGGTTCTGATAACACT	66	0	5	1	6	3	0	2	10	3	2	5	1	3	5	1	12	5	2
novel-m0231-3p	21	TTGGAGGGCTTCAACAACACT	66	0	3	4	14	6	2	0	7	5	3	0	5	1	1	6	3	4	2
novel-m0351-3p	21	TGATCATAGGTGGGCTCTACA	66	0	0	1	7	1	2	1	5	5	5	5	8	6	8	8	0	0	4
novel-m0130-5p	23	CACCACTCCATCCTCCTCAATCA	64	5	6	8	10	1	6	2	6	3	5	1	3	0	0	3	0	4	1
novel-m0313-3p	22	CGACCCGAGTTGCAGCCCTAGT	64	6	4	0	3	5	0	0	8	0	5	9	0	12	4	5	1	0	2
novel-m0339-5p	21	CAAGTCTCTTAGAGCACCCGA	64	0	2	7	9	4	5	2	1	6	2	8	1	4	3	4	4	1	1
novel-m0293-3p	23	AATTGGCCTCTTCATCAACTTGA	63	0	2	11	7	9	5	4	1	6	6	2	0	1	2	5	0	0	2
novel-m0091-3p	21	TAATTGCACACGGATTGGATC	63	4	0	4	2	3	3	0	3	0	4	2	8	3	9	9	3	0	6
novel-m0346-3p	21	CTTCGAGAAGAACCAGAACCC	61	5	3	1	4	6	4	5	1	3	3	2	1	1	4	6	4	4	4
novel-m0015-3p	21	TAGGCAACTGAGAGCATTGTG	61	3	4	11	9	2	2	3	3	1	0	2	4	5	3	1	3	3	2
novel-m0031-5p	23	ATAGATTGTCCAATGTTCAAAAT	60	9	1	0	3	8	1	0	8	2	0	2	4	0	3	0	4	10	5
novel-m0179-3p	23	CATTTCAAGAAACCATGGGCTCA	59	4	1	4	9	4	2	5	7	7	0	2	0	4	4	1	3	0	2
novel-m0295-3p	21	CTTTACCCCTCTTTGCACCTA	59	3	5	8	1	7	7	1	5	2	1	1	5	2	2	4	2	0	3
novel-m0095-5p	20	CGATGTTGAGGATGTGCGCC	59	0	2	1	0	1	0	4	1	5	5	0	0	28	5	6	1	0	0
novel-m0172-3p	22	TTTGAAACATAGTGACTCCATG	59	2	1	0	8	2	1	2	4	3	4	2	5	4	5	14	2	0	0
novel-m0213-5p	20	TCCGTGTTTGTCGACAGCTA	59	3	0	2	0	1	0	2	2	0	0	2	0	31	3	12	1	0	0
novel-m0098-5p	21	TTTTTCAACTGAAATTTGGTC	58	0	3	4	8	4	3	2	4	12	5	2	4	0	2	2	0	3	0
novel-m0226-3p	21	CGACCCGAGTTGCAGCCCTAC	57	1	3	5	4	3	2	7	6	3	1	1	1	4	3	2	7	3	1
novel-m0097-3p	21	TGTCTCTTTAGTGTGTTTCGC	57	7	3	4	2	5	1	0	0	6	1	4	7	0	3	11	3	0	0
novel-m0203-3p	23	GGAGATAAGCGGATGAGTTCATC	56	9	3	8	2	1	3	4	1	0	6	5	3	0	2	0	2	0	7
novel-m0012-5p	22	TGGTAGATGGTGTAGCTTCATA	56	5	4	6	1	5	7	0	0	0	1	10	3	0	2	8	0	0	4
novel-m0331-3p	21	TGTATCAAAATTGGGAGTGCC	56	4	3	0	5	3	5	6	2	1	3	2	11	1	0	4	2	0	4
novel-m0059-3p	21	GGGAGAGGATGGAGAAGGAAG	56	1	0	2	2	0	3	0	4	2	0	4	0	11	19	7	0	1	0
novel-m0079-3p	21	CCATGGAGTATGGCCGAACCC	56	0	4	7	10	2	4	1	1	4	0	1	5	3	5	7	0	1	1
novel-m0051-3p	21	TTGTGTTGCTTGTGTAGACCC	56	0	1	5	4	11	4	2	5	3	2	5	2	0	1	1	5	2	3
novel-m0281-3p	21	ATTTTGATACAAGGAGGCACT	55	0	6	0	8	1	1	3	0	4	2	5	2	9	4	5	2	0	3
novel-m0280-3p	21	ATTTTGATACAAGGAGGCACT	55	0	6	0	8	1	1	3	0	4	2	5	2	9	4	5	2	0	3
novel-m0206-5p	21	TGCACCGACCGAATCACTTTC	54	5	5	3	4	3	1	3	2	6	1	3	2	2	1	1	2	5	5
novel-m0061-5p	21	TAACCAGCACTGAAAACCGTC	53	1	2	8	5	0	1	0	2	0	0	6	4	2	11	7	1	3	0
novel-m0096-5p	22	ATCGACCGCAGCACGCGTGAGC	52	0	1	3	2	4	1	0	2	9	9	6	5	0	5	2	0	2	1
novel-m0267-5p	21	CCATGGTATATGGCCGAACCC	52	1	7	3	7	5	3	0	4	5	3	0	5	4	1	4	0	0	0
novel-m0334-5p	22	AGGATTCATCGTACTCTTGCGA	51	2	3	1	1	1	0	2	0	8	6	0	6	7	0	6	5	2	1
novel-m0353-3p	22	TTTGACTCTCTTTTCAAAGTTC	51	4	2	0	0	6	2	4	4	3	1	3	2	1	10	6	1	0	2
novel-m0246-3p	21	ATTACAAGTGCACTAGCCATG	50	1	6	3	0	3	2	3	4	8	3	0	6	0	5	5	0	1	0
novel-m0119-5p	22	CGGTGGATCCATGAACCCAGCA	50	4	0	3	0	1	6	0	0	2	1	1	0	17	13	0	0	2	0
novel-m0244-5p	21	CTGAGGCTCTGAATGAACTTT	49	9	4	2	1	1	1	1	6	4	9	1	4	1	1	3	0	1	0
novel-m0263-5p	21	CGAAGAAGGCCGTCTGGACGA	49	7	0	6	0	0	2	1	0	3	4	4	2	2	4	3	8	2	1
novel-m0021-3p	21	AAAATTTATTGAACCTGACCC	48	7	2	3	2	6	4	2	1	8	2	1	7	1	1	0	0	1	0
novel-m0192-5p	21	TGAGGACCCATATTGACTATC	48	3	1	1	4	6	2	4	1	5	0	0	4	1	5	4	7	0	0
novel-m0344-3p	21	TGGTTTAAGGATTTTAGGGTT	48	1	4	2	2	2	2	2	4	2	5	2	8	6	2	4	0	0	0
novel-m0314-3p	21	TCCGTGTCGGATATGCACCCG	47	10	4	4	1	2	0	2	1	4	2	2	5	3	0	1	3	1	2
novel-m0302-3p	21	TGCACTCCGACTCTGGCTAGT	47	2	4	0	4	2	0	2	21	1	3	1	0	2	0	0	4	1	0
novel-m0066-3p	21	TTACTGTTGCATCTCGAAGGA	47	10	3	1	3	4	4	4	1	3	1	2	5	0	1	0	1	4	0
novel-m0271-3p	21	CTTTTTCGTCAAGGTGGAGTT	47	4	3	1	5	3	0	0	7	0	2	2	1	4	3	11	1	0	0
novel-m0341-3p	21	TCCTGTTCACACTCACGAATT	46	2	0	2	0	4	2	0	0	8	5	0	3	4	7	8	0	1	0
novel-m0041-3p	22	CTTGAGGTGGAGGGCCCAAGCT	46	2	2	4	2	2	0	1	0	0	6	2	4	4	2	2	1	9	3
novel-m0038-5p	22	TTTCTATATTCGACATAGCGCG	45	2	4	1	5	1	1	2	0	3	2	7	8	1	2	4	1	1	0
novel-m0287-5p	23	CCTAGTGGTTGAGACACAAGACT	45	0	0	3	1	2	0	3	0	6	5	2	6	0	7	0	6	2	2
novel-m0286-5p	23	CCTAGTGGTTGAGACACAAGACT	45	0	0	3	1	2	0	3	0	6	5	2	6	0	7	0	6	2	2
novel-m0289-5p	23	CCTAGTGGTTGAGACACAAGACT	45	0	0	3	1	2	0	3	0	6	5	2	6	0	7	0	6	2	2
novel-m0288-5p	23	CCTAGTGGTTGAGACACAAGACT	45	0	0	3	1	2	0	3	0	6	5	2	6	0	7	0	6	2	2
novel-m0220-5p	22	TAGAGCTCCTTGTAAGGCTTGT	45	0	0	7	5	1	2	0	2	1	0	2	7	0	3	0	2	4	9
novel-m0319-5p	23	CCTAGTGGTTGAGACACAAGACT	45	0	0	3	1	2	0	3	0	6	5	2	6	0	7	0	6	2	2
novel-m0348-3p	21	TCGAGCTCGTCCGGGTGTGCC	45	0	0	1	3	3	0	1	3	5	1	0	1	8	12	0	4	2	1
novel-m0090-5p	20	TTGGGAGGGGTTGGGTGGTG	45	0	1	4	7	2	1	2	6	3	0	2	2	0	5	2	2	5	1
novel-m0241-3p	22	ATTGTGAATATCGGCCGATAAC	44	0	9	4	5	3	0	1	1	4	2	0	5	0	0	0	1	3	6
novel-m0092-3p	21	TCGAAGGACAAAATGGACAAT	42	1	2	2	1	0	0	0	2	5	5	2	5	3	5	9	0	0	0
novel-m0089-5p	21	CGGACTCCACGGGTTCTCCCT	42	1	3	13	2	4	0	3	3	3	1	3	2	0	0	4	0	0	0
novel-m0088-5p	21	CGGACTCCACGGGTTCTCCCT	42	1	3	13	2	4	0	3	3	3	1	3	2	0	0	4	0	0	0
novel-m0297-5p	21	CCATGTACCATGGCCGAACCC	42	2	3	4	0	1	6	5	0	2	2	9	0	2	0	3	1	2	0
novel-m0347-5p	21	TGAAGGACGATTTCGTGGGCC	41	0	1	3	4	1	0	1	1	8	5	1	3	4	3	2	1	0	3
novel-m0207-5p	20	AAGGAAATGCTTTCTTGGCA	41	1	2	6	0	1	0	0	4	2	4	0	1	8	2	9	0	1	0
novel-m0048-3p	22	ACTGGGCTGGGCGGGCGAGGCT	41	0	2	8	7	2	1	0	3	0	0	0	0	2	4	7	2	2	1
novel-m0284-5p	21	TGGACGTAGGCCAAGGTTGGG	41	0	4	5	2	4	0	2	3	4	1	0	0	5	1	2	2	3	3
novel-m0283-5p	21	TGGACGTAGGCCAAGGTTGGG	41	0	4	5	2	4	0	2	3	4	1	0	0	5	1	2	2	3	3
novel-m0228-5p	21	TTGGCTTGACGGTTAAGAACC	41	0	1	8	3	3	3	0	1	2	3	2	3	0	1	1	2	3	5
novel-m0212-3p	21	AAAGCAGGAACAGATTGGAAA	40	3	0	3	3	1	2	0	3	1	4	0	0	2	11	7	0	0	0
novel-m0301-5p	21	TTTTGGTTAGGGCTTCGAGGA	40	3	6	3	0	2	3	1	2	1	5	1	0	6	1	1	0	3	2
novel-m0329-5p	23	CACCTGCACCTGTAACTCTACCC	39	3	4	12	0	2	6	4	1	3	1	0	0	2	0	0	1	0	0
novel-m0278-5p	21	CCATCCAAGGTGGCCGAACCC	39	3	1	3	8	3	4	1	0	3	1	1	1	5	0	0	5	0	0
novel-m0161-5p	21	TTTCTAGCCACTTGATCTTAG	39	1	4	2	0	1	7	0	4	8	2	1	1	0	1	4	0	1	2
novel-m0024-5p	21	TTTGATTTGAGACTTTGAGAA	39	7	2	1	7	2	2	0	3	0	3	0	4	0	5	1	0	1	1
novel-m0305-5p	21	CCATGTGTATGGCCGAACCCC	38	1	1	3	5	0	5	0	3	0	1	0	3	1	10	0	0	1	4
novel-m0335-5p	21	AAGGAAAGTGCTTTCTTGGAA	38	0	2	1	5	2	1	2	2	2	3	0	9	0	4	3	1	1	0
novel-m0304-5p	21	CCATGTGTATGGCCGAACCCC	38	1	1	3	5	0	5	0	3	0	1	0	3	1	10	0	0	1	4
novel-m0153-5p	21	TGAAAATGCATTTTGGCCTGG	37	1	1	2	0	0	0	0	1	0	0	1	7	3	8	4	2	2	5
novel-m0170-3p	21	AACGGGTTCACAATGGATAAT	37	0	0	0	1	1	1	0	2	4	5	3	1	2	2	7	0	0	8
novel-m0122-3p	21	TTTCAAACTCACCCATCCTCA	37	4	1	2	3	2	0	6	0	0	0	1	3	1	5	4	5	0	0
novel-m0110-5p	21	TGATACCACTTGTTAGAACTG	37	0	8	2	3	2	4	3	2	0	0	1	4	1	1	2	0	1	3
novel-m0216-5p	22	AGAATGGGCTGGTTTAGATCGA	35	0	5	3	0	3	4	0	3	5	1	4	2	0	0	3	0	0	2
novel-m0200-3p	21	ATATATTGGTTGTGCTCGAAA	35	2	0	0	1	1	4	0	5	0	5	0	5	6	4	0	0	1	1
novel-m0121-3p	20	TTCTCCATCTTGCACGACTC	35	0	2	5	0	4	0	3	5	5	1	1	3	0	0	0	2	0	4
novel-m0352-3p	21	AATTCTGAAGTTCATAAAATT	35	3	4	7	2	3	5	2	0	1	0	0	3	0	1	2	0	2	0
novel-m0019-3p	21	TTCAGATCCTCGGGCCTCCCG	34	0	1	0	7	0	0	4	2	1	1	1	4	3	1	3	1	3	2
novel-m0300-5p	21	TGGATTGTAACACCCCACCCA	34	0	0	2	4	4	2	2	0	2	2	0	4	0	7	2	0	2	1
novel-m0238-5p	21	TTAGGACCTGGGCTTCCAGCC	33	0	4	1	2	0	1	0	0	2	5	5	5	2	0	1	0	2	3
novel-m0143-5p	20	AAGAAGGAGAAGAAGAAGAG	33	2	2	0	1	1	1	1	0	3	6	2	1	0	7	5	0	0	1
novel-m0144-5p	20	AAGAAGGAGAAGAAGAAGAG	33	2	2	0	1	1	1	1	0	3	6	2	1	0	7	5	0	0	1
novel-m0324-5p	21	AGATTGAAGAGATTAGGGGCC	33	0	0	0	0	6	0	2	1	0	5	1	3	4	4	4	1	1	1
novel-m0076-3p	20	AAGAAGGAGAAGAAGAAGAG	33	2	2	0	1	1	1	1	0	3	6	2	1	0	7	5	0	0	1
novel-m0322-3p	21	CATGCATGGCTTAATACATCT	33	0	2	2	3	5	1	0	1	4	5	0	0	4	1	0	0	0	5
novel-m0075-3p	20	AAGAAGGAGAAGAAGAAGAG	33	2	2	0	1	1	1	1	0	3	6	2	1	0	7	5	0	0	1
novel-m0140-5p	23	AAGTCGATGAAGTGAGTGATTCA	32	2	5	3	6	5	1	0	0	0	0	1	5	0	0	0	1	1	2
novel-m0006-5p	23	ATTTTAGCTTTGTGATTTTGGAC	32	0	3	1	2	3	0	3	0	3	1	3	4	0	1	1	2	4	1
novel-m0269-3p	21	TCCTTGTGGCTGGCCAGATCC	32	2	2	1	0	4	0	0	0	2	0	0	0	5	4	5	4	1	2
novel-m0057-5p	21	TCCGTGCACCATGAGTTTTCA	32	4	2	1	0	0	0	0	3	1	5	2	2	5	0	0	1	1	5
novel-m0099-5p	21	TGCACGGGAGGGAGGTTAGTT	31	0	2	1	1	4	0	5	7	2	3	3	1	0	0	2	0	0	0
novel-m0311-3p	21	TGATAAGTGGTACATCGGTAG	31	0	0	1	1	2	4	1	8	0	0	2	0	2	0	3	2	0	5
novel-m0155-3p	21	AAAGATGTGCACCATGGGAGA	31	0	0	0	0	0	0	1	0	2	0	0	1	4	11	6	3	1	2
novel-m0062-5p	21	CTCTAAGAGGCCCTGGACACC	31	2	0	0	3	0	2	0	0	8	0	1	2	0	4	5	0	4	0
novel-m0355-3p	21	AAACTTTGGTTTGTGGGGCCC	31	5	0	0	3	1	1	0	1	6	0	1	2	1	9	1	0	0	0
novel-m0114-5p	21	CTCTAAGAGGCCCTGGACACC	31	2	0	0	3	0	2	0	0	8	0	1	2	0	4	5	0	4	0
novel-m0101-5p	21	TGCGTATCGGCCGAGATATCT	30	0	0	5	1	2	1	1	1	3	3	2	2	0	3	0	3	1	2
novel-m0317-3p	21	TGTTATCAGAACCGGACCGAA	29	0	0	1	2	0	4	1	2	0	0	4	3	4	0	3	3	2	0
novel-m0040-5p	21	TTATCAGAACCGGACCAAACC	29	0	2	2	4	0	1	1	4	3	0	2	3	3	2	1	0	1	0
novel-m0176-3p	21	TAAATTGCACAAAGCCCCGTC	29	3	0	0	1	3	0	0	3	3	1	1	0	0	5	4	0	1	4
novel-m0187-3p	21	TGGCCTAGAGATTACAAGAAG	29	3	0	2	5	4	3	0	1	3	3	2	3	0	0	0	0	0	0
novel-m0150-3p	21	CACCGGAGAATTCAGAGCTTC	29	6	3	1	1	1	0	0	0	2	2	1	1	9	0	1	0	1	0
novel-m0214-5p	23	CATAAACAGTAAATTGGCTCACC	29	3	0	2	3	1	1	3	0	0	1	1	5	2	2	0	0	2	3
novel-m0147-5p	22	CAAGCTAGGCTCTGGGAAAGGC	29	6	2	1	3	1	0	3	2	2	0	0	0	0	1	4	1	0	3
novel-m0357-3p	20	TTTCCATGTCAAGTTTGTAG	28	0	1	1	6	1	0	0	1	3	4	4	4	1	0	2	0	0	0
novel-m0238-3p	23	TGGAGTGACCCAAGTCCTTTATA	28	1	10	1	2	2	5	0	0	3	0	0	1	0	0	0	1	0	2
novel-m0275-3p	21	CATCACCAATGCGAATGGCAT	28	3	3	4	3	0	2	2	4	2	2	3	0	0	0	0	0	0	0
novel-m0217-5p	21	TTACAAATGGTATCAGAGAAC	28	0	1	3	0	4	1	0	2	1	5	3	4	0	0	0	0	2	2
novel-m0113-3p	21	TCAAGTGGCTATAAATTGAAT	28	1	3	1	3	3	1	0	1	8	2	1	2	0	0	1	0	1	0
novel-m0279-5p	21	CCCCATTGGATGGCCGAACCC	28	0	1	5	1	1	3	1	3	0	0	0	3	3	1	0	2	1	3
novel-m0226-5p	21	CGGGTCGGGTTGGGTTCAATA	28	0	1	0	1	3	0	0	0	8	4	2	3	0	2	1	0	1	2
novel-m0118-3p	22	TGAATCAAAAGAGTTCTGCACC	28	1	0	6	0	2	3	2	0	0	4	0	3	0	3	3	1	0	0
novel-m0154-3p	21	TCCACAGACTGATGGACAGTC	28	0	2	2	3	0	5	1	0	0	2	3	2	0	1	0	2	3	2
novel-m0025-5p	21	TGAGATACGAAGTGGATGATC	28	0	1	0	2	0	0	2	2	6	1	2	1	1	4	6	0	0	0
novel-m0210-5p	21	CGGGTCGGGTTGGGTTCAATA	28	0	1	0	1	3	0	0	0	8	4	2	3	0	2	1	0	1	2
novel-m0227-5p	23	AGAGGATGACTAAGTGCAATGCT	27	1	0	2	2	2	0	1	6	0	2	0	4	2	0	3	0	2	0
novel-m0224-5p	21	AGTGAATTCTCCACATAAGAA	27	0	4	0	0	5	1	0	0	4	0	5	4	0	0	0	1	0	3
novel-m0193-3p	21	ACGGGAGTTGTTGAATATCAA	27	4	0	6	2	3	2	4	0	0	0	1	0	4	0	0	1	0	0
novel-m0056-3p	21	CTGGGCAATGTCTGAAGAGAA	26	0	1	4	1	3	1	1	5	2	0	1	1	2	2	1	0	0	1
novel-m0049-3p	22	ACTGTTATTGGAGTTGTCGCTG	26	2	0	2	0	0	2	0	0	1	0	5	0	4	7	3	0	0	0
novel-m0103-3p	22	TTGAGCCCCGCCAATATCGCGA	26	0	0	1	0	0	0	0	4	5	3	0	0	7	3	3	0	0	0
novel-m0063-5p	21	TATTATCATCCAAGTGCTGCT	26	0	1	3	4	3	1	0	0	5	0	3	2	0	2	0	0	0	2
novel-m0195-5p	21	TTCGATTCACGCTCAACACCC	26	0	1	2	3	0	0	0	6	7	3	0	0	1	3	0	0	0	0
novel-m0204-5p	21	TTGGGAATAACGAGGGCATCT	26	0	0	2	2	2	2	2	1	1	1	3	1	4	1	2	0	2	0
novel-m0055-5p	20	CAACCGACTGCTGTCTGATT	26	1	2	1	2	0	0	0	2	3	0	2	0	2	0	0	0	3	8
novel-m0282-5p	21	GAGAATGGAGGCTGTAAGTGT	26	2	3	1	0	4	0	4	0	0	0	3	2	0	0	0	4	2	1
novel-m0326-5p	21	TCTGAATGGCCATCTCAACGA	25	1	0	2	1	0	2	1	1	0	7	3	1	0	0	1	2	0	3
novel-m0265-3p	21	TCCTTGGATGAGAACAATGCT	25	0	0	0	5	0	4	3	0	6	0	0	2	0	1	3	1	0	0
novel-m0338-5p	21	TATGAGGGAGTTAGAAATGCT	25	0	0	0	4	3	0	0	3	0	1	2	1	2	4	2	2	0	1
novel-m0164-3p	22	TGAAACTTCAGCCACCCCCTAT	25	1	0	1	5	3	0	0	1	2	0	0	2	0	0	0	1	3	6
novel-m0268-3p	21	TCTCTGCGGCTGGCACTCGAG	25	0	0	1	2	1	2	1	0	0	3	1	0	4	6	3	1	0	0
novel-m0180-5p	23	AACGACTTGCCTGGAAAGTAACC	25	0	0	2	0	0	0	2	0	5	0	1	2	5	3	2	0	0	3
novel-m0030-5p	22	TCTGGATAGGATCACTTCTTTC	25	0	0	0	0	0	0	0	0	0	0	0	0	0	0	3	4	11	7
novel-m0084-3p	21	AAAAACGCCGATGCCCCTATC	25	1	1	1	3	0	2	4	0	5	0	2	3	0	1	1	0	1	0
novel-m0273-5p	22	CTCGGGATACTCTTTTATCATT	25	2	3	0	2	0	1	2	0	2	3	1	1	2	1	5	0	0	0
novel-m0009-3p	22	TGCATTCAAATGGAGCCTGAGA	24	3	0	0	0	0	5	0	5	2	0	2	0	0	0	1	3	1	2
novel-m0001-3p	21	TTAGCATTGAGTTGGTCCCGA	24	0	1	2	1	0	2	6	3	0	1	0	0	0	3	2	1	0	2
novel-m0181-3p	21	TTCCACTATCGTCACTGCTTG	24	0	1	2	1	0	0	0	0	2	0	0	0	4	0	2	1	4	7
novel-m0162-3p	21	TTACCCCCATCCAAACGCAGC	24	0	5	1	0	1	1	1	0	0	2	0	0	6	2	2	0	1	2
novel-m0074-5p	21	CTTAATCCTGACTTTGAGCCT	23	0	0	3	2	1	0	0	5	0	2	0	0	2	0	2	1	0	5
novel-m0166-5p	21	CGGAGAACGGCAAGTAAGGCA	23	0	0	5	2	1	0	4	3	3	0	0	0	3	0	0	0	1	1
novel-m0318-5p	21	CTATTCCGGACTCAAGAACCC	23	0	0	1	0	3	0	0	3	2	3	1	0	0	7	1	0	1	1
novel-m0276-5p	23	ACATTCTTGAGGTAGAACTCACT	23	4	5	1	0	1	0	0	4	0	1	2	0	0	1	0	3	1	0
novel-m0218-3p	21	TGCACGACCTTATTCATGATC	23	0	0	0	0	0	0	0	4	0	1	4	0	3	1	7	1	2	0
novel-m0083-3p	21	TCAAAGACATGGGTGCCTGAT	23	0	0	2	3	2	0	0	0	1	0	0	4	1	5	4	1	0	0
novel-m0331-5p	21	CACTCCCAATTCCGATACAAG	23	1	3	1	1	2	2	0	2	3	0	1	0	0	0	5	1	0	1
novel-m0145-5p	21	ACCGGGAATTCTGTAAACGCG	23	0	0	2	1	0	1	1	0	0	1	1	0	7	1	2	3	2	1
novel-m0199-5p	23	AACAGATTGCTTCTTGCTACGCC	23	1	0	0	1	7	1	1	1	1	4	1	1	0	2	0	1	1	0
novel-m0219-3p	21	TGCACGACCTTATTCATGATC	23	0	0	0	0	0	0	0	4	0	1	4	0	3	1	7	1	2	0
novel-m0123-5p	21	CGGAGAACCCACACACCTGAG	23	1	1	2	2	2	5	0	0	1	0	0	1	4	2	0	1	0	1
novel-m0209-3p	23	ATATCGGCCGATACATATTGTAT	23	0	2	6	0	2	0	0	0	4	5	0	2	0	0	0	1	0	1
novel-m0094-3p	22	CACTGTAGATATTTCGCCGATA	23	0	0	0	3	2	0	3	1	4	0	0	0	0	4	2	0	1	3
novel-m0362-5p	20	AGTAACTCGAGGAGGCACCC	23	0	0	0	0	2	0	0	0	1	0	4	1	0	4	3	2	4	2
novel-m0310-3p	21	TCGGTTGTGGATTCTTGCACC	22	0	1	0	1	2	0	0	0	0	0	2	3	0	1	7	1	1	3
novel-m0240-3p	21	TGAGTCACTCTCGGATTGGGC	22	2	0	0	2	3	5	0	3	0	4	1	0	0	0	0	1	1	0
novel-m0127-3p	21	TTCAAGTTCATGAAAGCTGTG	22	0	0	6	0	2	2	0	0	3	5	2	2	0	0	0	0	0	0
novel-m0336-3p	21	CCTTGACCGTCAGGCCAACCC	22	0	3	4	0	2	0	0	0	3	0	0	1	2	0	3	3	1	0
novel-m0234-5p	22	TAGGGTTACCGTATTAGTTGTC	22	0	1	0	3	0	1	0	3	0	1	1	1	0	1	2	2	4	2
novel-m0126-3p	21	TTCAAGTTCATGAAAGCTGTG	22	0	0	6	0	2	2	0	0	3	5	2	2	0	0	0	0	0	0
novel-m0343-5p	21	TAGTTTTAGGGTTTTAGGAGT	22	0	1	0	1	1	1	2	0	0	4	3	1	6	0	1	0	0	1
novel-m0174-3p	21	TGCTAGGATTCAGTTAGGTGA	22	0	2	1	1	1	2	0	5	2	1	0	0	0	0	1	3	1	2
novel-m0354-5p	21	TATGCACTGTGAATTCTGGTG	22	1	1	3	3	2	2	0	0	0	0	2	0	2	3	2	0	1	0
novel-m0320-5p	21	ATGCGCATAGGCTACGGCTCC	22	2	3	0	0	2	0	0	0	4	2	0	2	0	3	3	0	1	0
novel-m0016-3p	21	GTTCAAACCATGGGAGCTCCA	21	0	2	2	1	2	1	0	0	2	2	2	1	0	2	0	0	4	0
novel-m0294-3p	21	TTGAAAATATGGCCGTTGGAA	21	1	0	1	3	0	0	0	2	0	4	1	3	0	4	1	0	0	1
novel-m0291-3p	21	ATGTGCTTGGATTAATTGAAG	21	0	0	0	3	2	3	0	0	1	0	0	7	0	2	0	2	1	0
novel-m0142-5p	22	CAGGGAAAGGAAAGTGAATTTC	21	6	0	0	1	0	1	1	0	0	5	0	2	2	0	0	1	0	2
novel-m0239-5p	21	TTTGAGATTCTGATTTTTTGT	21	0	0	3	1	0	1	0	0	1	2	0	3	3	4	1	1	1	0
novel-m0100-3p	21	AGGAGGAATTTGGGATCAGTG	21	0	0	0	3	2	0	1	0	1	2	0	0	5	4	0	3	0	0
novel-m0292-5p	21	CCATATACCATGGCCGAACCC	21	0	0	4	0	0	1	1	1	1	4	0	2	0	2	1	2	1	1
novel-m0116-3p	23	TGTGCTTCATCGGTGTAAACCAG	21	5	3	0	0	1	1	0	2	2	1	0	1	0	2	0	3	0	0
novel-m0350-5p	21	AACCAGTTTGATTGAATGACT	21	0	0	0	0	1	0	0	0	0	7	2	5	0	4	0	0	0	2
novel-m0233-5p	23	TCTGAAGGATACTGTGCTAGAGC	21	0	0	2	0	0	0	7	3	1	0	1	1	4	0	1	0	1	0
novel-m0215-3p	21	TCTTTCATCCTGGTCGGAGGA	20	0	4	0	0	0	0	0	0	1	0	2	6	0	1	5	0	1	0
novel-m0253-3p	23	AATGAGTTCAAATTGGGTTGGAT	20	0	1	0	1	3	0	0	4	1	4	0	3	1	0	2	0	0	0
novel-m0247-5p	21	TGAGGACGAAGAGGAGGACGA	20	0	0	1	2	0	2	0	4	3	2	2	1	0	3	0	0	0	0
novel-m0131-5p	23	GATCAACGTAGAATTCGCACAAA	20	1	3	0	4	2	0	1	0	2	2	1	0	0	1	0	1	1	1
novel-m0349-3p	21	TTTTCCCGGAAAATTCATTGC	20	0	0	0	1	1	1	7	0	0	0	0	3	2	1	3	1	0	0
novel-m0086-3p	23	GGAACTGGGCGTGGACGTGGAAG	20	4	0	2	5	0	4	1	0	2	0	0	2	0	0	0	0	0	0
novel-m0050-5p	21	TATCGGCCGATATTTTGATAT	20	0	3	6	0	0	0	0	0	2	0	3	3	0	0	1	0	0	2
novel-m0232-3p	23	AATTCCGCCAAGATCTCTTCGTT	20	0	1	1	5	0	0	3	0	3	0	2	2	0	1	0	0	2	0
novel-m0131-3p	23	TTTGTGAATTCTACGTTAATCAG	20	4	3	1	3	2	1	0	0	0	1	1	1	0	1	1	0	0	1
novel-m0171-5p	21	ATTTAGACACCCGACTTTTCT	20	0	1	1	5	0	0	1	3	2	0	0	1	1	2	3	0	0	0
novel-m0067-5p	23	ACTGGACCAATGATTTGAGCAAT	20	0	0	1	0	2	0	0	0	0	8	3	0	0	6	0	0	0	0
novel-m0241-5p	21	TATCGGCCGATATTTTGATAT	20	0	3	6	0	0	0	0	0	2	0	3	3	0	0	1	0	0	2
novel-m0245-5p	21	TGAGGACGAAGAGGAGGACGA	20	0	0	1	2	0	2	0	4	3	2	2	1	0	3	0	0	0	0
novel-m0188-5p	21	TCAATGGCATGAATTCTTTCC	20	0	2	0	0	0	4	4	0	1	5	0	2	2	0	0	0	0	0
novel-m0211-5p	21	ACGTTGACTGGAAGGAAAGAG	20	6	4	2	0	0	0	0	0	1	0	0	3	2	2	0	0	0	0
novel-m0167-3p	21	TTGATTTTTGTGAGATAGGCT	20	0	3	1	1	0	4	0	2	1	0	0	4	0	1	3	0	0	0
novel-m0058-5p	23	CTCCAGGGAGGACGCTTCACACC	20	0	4	3	2	3	0	0	2	1	2	2	0	0	0	0	0	1	0
novel-m0189-3p	20	AGGCATGTATCTCTCAGAGG	20	14	0	0	2	0	0	2	0	0	1	0	0	0	1	0	0	0	0
novel-m0134-5p	21	TGATCTTGGCTATGGAGAGAA	20	0	3	0	3	3	2	2	1	2	1	0	1	1	0	1	0	0	0
novel-m0054-5p	23	GATTTAGCTGTAGAACCTGCAAC	20	3	1	2	0	1	2	1	0	1	0	3	1	1	1	3	0	0	0
novel-m0175-5p	21	TCCTGATTCCGGCACTTCCCA	20	1	0	3	0	1	1	0	1	0	2	4	0	0	3	0	0	0	4
novel-m0158-5p	22	TTTGTGTGGCCCAAATAGACTT	20	0	1	1	4	3	0	0	4	1	0	0	4	0	1	1	0	0	0
novel-m0137-3p	22	CTCACACTTTACCTCTTTGATC	19	0	0	5	0	0	0	0	0	2	2	1	2	5	0	2	0	0	0
novel-m0028-5p	21	TACCATCAGGTAGGCTTCTGA	19	3	0	3	1	2	2	1	0	0	0	1	0	0	1	0	1	1	3
novel-m0327-5p	21	TGGGGGCTCGAACCTGGCACC	19	3	4	1	0	0	0	0	0	0	0	0	0	3	1	0	5	2	0
novel-m0132-3p	22	GATCCGTCACTGAAAGCATTGA	19	3	3	0	2	2	0	1	1	0	3	3	1	0	0	0	0	0	0
novel-m0102-3p	23	TGCAAACTTTGGATTGTGGGGCC	19	0	0	4	2	0	5	0	0	1	1	2	0	0	0	0	3	0	1
novel-m0227-3p	24	CATTTCCTTTCAGCCATCCTCTCT	19	5	1	0	5	0	0	2	0	0	2	0	1	0	1	2	0	0	0
novel-m0043-3p	21	CTGTCCACATGGTTGCAGCCT	19	0	1	3	2	0	2	4	0	0	3	0	3	0	1	0	0	0	0
novel-m0036-3p	21	TCATCCATTCGCCACCTAAAT	19	0	1	4	2	2	1	1	0	5	0	0	1	0	2	0	0	0	0
novel-m0147-3p	21	TTTGAGCCAGGGTCGGTGGAC	19	0	4	1	3	1	0	0	2	0	0	0	3	0	0	3	0	2	0
novel-m0109-3p	21	ATTTTCTATTGGTGGCTGAAG	19	0	0	0	3	3	0	2	0	0	0	1	0	3	3	4	0	0	0
novel-m0039-3p	22	CCGTTCCCTCGTATTCTTGAAA	19	0	4	0	0	0	4	1	1	0	3	1	0	4	0	1	0	0	0
novel-m0363-3p	23	TGCAAACTTTGGATTGTGGGGCC	19	0	0	4	2	0	5	0	0	1	1	2	0	0	0	0	3	0	1
novel-m0136-5p	21	CACCGGTACTCTCTTTGACAG	19	3	0	0	0	0	0	0	0	3	0	0	0	10	3	0	0	0	0
novel-m0325-5p	21	TGAGCTCCGGGCTTGTTCGCC	19	0	0	0	1	0	2	4	0	6	1	0	4	0	0	0	1	0	0
novel-m0260-3p	20	GCATTGTATCTCTGGAACAA	19	6	1	3	2	1	0	0	0	1	0	1	1	0	3	0	0	0	0
novel-m0345-3p	22	GATTCAAGGTATGGCAGTAGTT	19	0	3	0	1	0	3	0	2	0	0	1	5	0	0	1	2	1	0
novel-m0258-3p	20	GCATTGTATCTCTGGAACAA	19	6	1	3	2	1	0	0	0	1	0	1	1	0	3	0	0	0	0
novel-m0259-3p	20	GCATTGTATCTCTGGAACAA	19	6	1	3	2	1	0	0	0	1	0	1	1	0	3	0	0	0	0
novel-m0333-3p	21	CGACCCGAGTTGCAGCCCTAG	18	6	3	0	2	2	0	0	0	0	0	1	0	0	0	3	1	0	0
novel-m0274-5p	22	TCCGAGACAAGTTCCGAAGGCT	18	0	1	2	0	3	1	0	0	3	0	1	0	0	0	0	6	1	0
novel-m0326-3p	21	TTGAAGATGGACCGAAAGACC	18	0	0	0	1	2	0	2	1	1	3	0	0	0	1	3	4	0	0
novel-m0125-5p	21	CTCCAGAATCTTTGAAGAGCT	18	1	0	1	0	0	1	1	0	0	0	0	0	0	0	3	7	3	1
novel-m0087-3p	21	TTAGAACACCTGACTAATCCT	18	0	0	0	1	2	1	2	1	4	1	1	0	0	0	0	2	0	3
novel-m0360-3p	22	GTCATGGAACTCTAGAACAACA	18	0	1	2	0	0	3	0	0	0	1	1	1	5	0	1	2	1	0
novel-m0157-3p	22	AAGGGATTGCGCGGGGAGAGCT	18	0	0	1	0	2	1	0	1	2	0	0	1	0	3	5	0	2	0
novel-m0020-5p	22	AAGAGAAGACGAAGAAAAAGAA	18	0	2	0	0	0	0	1	2	4	0	0	0	0	1	0	3	5	0
novel-m0002-3p	21	CGACCCGAGTTGCAGCCCTAG	18	6	3	0	2	2	0	0	0	0	0	1	0	0	0	3	1	0	0
novel-m0172-5p	23	TTGGAGTTTACTGGTTTTAAATT	18	0	0	3	1	1	0	0	0	2	1	0	1	2	4	3	0	0	0
novel-m0191-5p	21	TGTTCCGGCTAGTTCTTTTGC	18	0	2	0	0	1	0	2	1	6	0	1	1	3	1	0	0	0	0
novel-m0005-5p	23	GCGATATGCCGACGACTTACTAC	18	1	0	0	0	1	1	0	2	4	3	0	2	3	0	0	0	1	0
novel-m0073-5p	23	AGAGGAGAGAACCAGGTTCGGCC	18	4	1	1	1	3	0	0	0	0	0	1	2	0	1	2	0	0	2
novel-m0207-3p	22	TTCCAAGAAAATAATTTCCTTT	18	3	1	3	4	0	1	0	1	1	0	0	1	0	0	0	1	0	2
novel-m0323-3p	21	CTTCCTTTCCCTGCATCCAAA	18	0	0	0	2	0	0	1	2	2	1	0	4	0	1	3	2	0	0
novel-m0332-3p	20	ATGTATTTGTGGAGACTTGG	18	0	0	0	1	0	0	5	0	4	0	0	1	0	2	0	0	4	1
novel-m0340-3p	20	TCGGCCGATACGATATGTAT	18	0	1	0	2	1	5	2	2	0	0	0	0	0	0	2	1	0	2
novel-m0312-5p	21	CGACCCGAGTTGCAGCCCTAG	18	6	3	0	2	2	0	0	0	0	0	1	0	0	0	3	1	0	0
novel-m0163-5p	21	TAGGACCCACCAAATTGGATG	18	0	1	0	0	1	1	2	1	4	3	0	0	0	4	0	0	0	1
novel-m0156-5p	21	TTGGACCCATTCTGCCCGAGA	18	2	0	0	0	0	1	2	0	1	0	2	0	0	2	0	5	1	2
novel-m0003-3p	21	TCGAGATTCAGCGTCTGTAGC	18	1	2	1	1	2	0	0	0	0	1	3	0	3	1	0	0	2	1
novel-m0045-5p	22	TTTGTCACCATCTTCAAGAAGA	18	2	0	0	1	2	0	0	0	1	0	3	0	4	2	1	2	0	0
novel-m0165-3p	22	TAAGGTACTCCACAATTCTACA	18	0	0	0	0	1	3	0	0	3	6	0	3	0	0	0	0	1	1
