# Supplementary material for: Small RNA and Degradome Sequencing in Floral Bud Reveal Roles of miRNAs in Dormancy Release of Chimonanthus praecox
Source: Int J Mol Sci. 2023 Feb 20;24(4):4210. doi: 10.3390/ijms24044210 (PMC9964840; doi:10.3390/ijms24044210)
Supplement: Supplementary file 1 [file ijms-24-04210-s001.zip › Table S5. The charaterization of novel miRNAs identified in wintersweet floral buds.xlsx]

## Sheet: Table S5
Table S5. The charaterization of novel miRNAs identified in wintersweet floral buds
mature_id	hairpin_id	genomic_id	hairpin_start	hairpin_end	hairpin_strand	hairpin_length(nt)	hairpin_energe(kcal/mol)	hairpin_GC	hairpin_MFEI	mature_seq	mature_length(nt)	mature_arm	hairpin_seq	hairpin_struct
novel-m0001-3p	novel-m0001	Unigene0000710	125	239	+	115	-28.6	43.48	0.57	TTAGCATTGAGTTGGTCCCGA	21	3p	tgacctagctacaaggatgggactgaactctatggtatggaaagacagaattggaacctaaaggggtgataggagttgctagttTTAGCATTGAGTTGGTCCCGAactaaaggtt	.(((((.......((..(((((((.(((((.(((.((.....((.(((..(((..((((....))))..)))...))))).....)).))).))))))))))))..))..)))))
novel-m0002-3p	novel-m0002	Unigene0000825	1	147	+	147	-59.6	49.66	0.82	CGACCCGAGTTGCAGCCCTAG	21	3p	ttaagggtattacaatctcgggtcgggtcgagttcactatctcgggttttttcttgggtcgggttcaatatggagtgagtcgggttagggttgggtttactaaaacctggcccgccCGACCCGAGTTGCAGCCCTAGaaatcattat	...(((((....(((.((((((((((((((((........))))........(((((.(((..((((...)))).))).)))))...(((((((((((....))))))))))))))))))))))))))..)))))............
novel-m0003-3p	novel-m0003	Unigene0001045	1640	1860	+	221	-87.6	57.47	0.69	TCGAGATTCAGCGTCTGTAGC	21	3p	gaggagtccgagttctggcggaatctcgccggatagctgattaccagacaggtccagcgagttcagcccccgcagcgacccaattgacggcggaatctcgccggatatcctgttgttgctgaggtcgagcacggtgagcgcctgccatgaggaaatttccggcggaaacaaaccggagattctgttgctgTCGAGATTCAGCGTCTGTAGCtgggacaact	.((..((((.(((((.((((((((((((.((((((((((.....))).((((((((.((.((((.(((.(.((((((((........((((((....))))))........)))))))).).))).)))).)).)).).)))))((....)).(((((((((..........)))))))))))))..))).))))))))..)))).).)))).))))..))
novel-m0004-3p	novel-m0004	Unigene0001127	52	147	+	96	-34.1	59.38	0.6	CGGTCCGGTTCTGATAACACT	21	3p	ccgccagccggttttttacctgaaccgaaccgtagatccggcggtcacgcggttcagccgcggtgCGGTCCGGTTCTGATAACACTgacttggata	...((((.((((...(((.(.((((((.((((((((((....)))).((((((...)))))).)))))).)))))).).))).)))).).)))...
novel-m0005-5p	novel-m0005	Unigene0001399	426	630	-	205	-56.3	51.71	0.53	GCGATATGCCGACGACTTACTAC	23	5p	tttgttacgcGCGATATGCCGACGACTTACTACtgggaatcgtgggtgccgtagagcttctcatagaaatacaaaaacgtatcacccacttcctacaatccggcctgaacctttgggtaggctctgcaggatcaacaaccatagctgcacggagtacggtagaattcctcggtacggtcattcgggaagtccctccgaggacgac	.......(.((.(((.((((((.((.((.((((((((((..(((((((.....(((...)))......((((......))))))))))))))).....((((((((..(((....)))))))..(((((...............)))))))))...)))))))).)).))))))..)))...)).)..((((......))))...
novel-m0006-5p	novel-m0006	Unigene0002326	39	129	-	91	-38.2	32.97	1.27	ATTTTAGCTTTGTGATTTTGGAC	23	5p	ccatctgcttATTTTAGCTTTGTGATTTTGGACtttgaatatttgaatttttctcatggtccaaatcacaaagcagtgatgattagatgga	(((((((.(((((...((((((((((((.(((((.(((...............))).)))))))))))))))))...))))).))))))).
novel-m0007-5p	novel-m0007	Unigene0002643	94	355	+	262	-96.3	52.29	0.7	CCAAAGTGGACAATATTGTGCT	22	5p	tgtgtcaggcCCAAAGTGGACAATATTGTGCTgtgtggggcaggtcgttacaaatgatatcagagccgaagacggctctagcctaagggggtgagattgtgatgaccaacaccagatggagagtggaggagaatacgctggttcgacttccagatatcatatcacctgggtaaggcaaatgtggtggctgatgctttgagccgcaagtcccgcagtacggtggccagtttggggattggacagtggcagatgcttgagacag	(((.(((((((((((.(((.(..(((((((((((..(((((.(((((((((((........(((((((....))))))).((((....))))....))))))))))).......((((((...((((((.((((......))))..))))))....)).)))).(((.....)))........((((((.(.....).))))))..)))))))))))))))))))).))))))..(((........)))...))))).))).
novel-m0008-3p	novel-m0008	Unigene0002692	509	594	+	86	-24.9	55.81	0.52	TCTGGAGGACAGCTCGATGGC	21	3p	caaatatgtagccggagtgggttgccttcaagaaggagccgcagaactgatgctgTCTGGAGGACAGCTCGATGGCcgaagagagg	..........((((...(((((((((((((.((...(((..((....))..))).)))))))).))))))).))))..........
novel-m0009-3p	novel-m0009	Unigene0002693	450	597	-	148	-59.5	33.78	1.19	TGCATTCAAATGGAGCCTGAGA	22	3p	tttggaatctcataggctctgattggatgcatgaaaagtactttcttggaaaattaacattttaaccatttttggttaggaaatggttattttccacgaaagaactttgcttcccaTGCATTCAAATGGAGCCTGAGAtattttacat	..((((((.((.(((((((((.(((((((((((..((((((((((.((((((((...(((((((((((....)))))..))))))...)))))))).))))).....)))))..))))))))))).))))))))).)).))))))...
novel-m0010-3p	novel-m0010	Unigene0002907	177	273	+	97	-49	52.58	0.96	CCTTTCTTCACATCTCTCTGGCC	23	3p	tttggaggggttacacgggcgagagagatgaagaaaggagtccagtgcatccatacgccggagtCCTTTCTTCACATCTCTCTGGCCcttctcatct	....(((((.......((((.((((((((((((((((((.(((.(((........))).))).)))))))))))..))))))).)))))))))....
novel-m0010-5p	novel-m0010	Unigene0002907	177	273	+	97	-49	52.58	0.96	CGAGAGAGATGAAGAAAGGAG	21	5p	tttggaggggttacacgggCGAGAGAGATGAAGAAAGGAGtccagtgcatccatacgccggagtcctttcttcacatctctctggcccttctcatct	....(((((.......((((.((((((((((((((((((.(((.(((........))).))).)))))))))))..))))))).)))))))))....
novel-m0011-3p	novel-m0011	Unigene0002908	439	809	+	371	-135	50.94	0.71	CCTTTCTTCACATCTCTCTGGCC	23	3p	tggatgggggaaaattttggaggggttacccgggcgagagacatgtgaagaaaaggagtgcaatgaggaaccgatatcgatgggaaatgattagggttctctcctagggctgcgttcggaagaaaggacaacggcgcttctcctagggctccgttgggatgaggattaattttggaggggttaccgcacgggagagatgaagaaggactctggcacttctcgcgtttggatgggagtacccatatcgatgggaaatgattagggttctttcaattttggaggggttacacgggcgagagagatgaagaaaggagtccagtgcatccatacgccggagtCCTTTCTTCACATCTCTCTGGCCcttctcatct	.(((((((((....(((((..(((....)))...)))))..............(((((........((((((...((((........))))...)))))))))))...((((.((((........))))..))))((((((((...((((((.(((((((........))))))).)))))).((.....)).(((((...((((((((((((((.((((((((.....(((((....)))))..)).)))))).)).))))))))))))..))))))))))))).....((((.((((((((((((((((((.(((.(((........))).))).)))))))))))..))))))).)))))))))))))
novel-m0011-5p	novel-m0011	Unigene0002908	439	809	+	371	-135	50.94	0.71	CGAGAGAGATGAAGAAAGGAG	21	3p	tggatgggggaaaattttggaggggttacccgggcgagagacatgtgaagaaaaggagtgcaatgaggaaccgatatcgatgggaaatgattagggttctctcctagggctgcgttcggaagaaaggacaacggcgcttctcctagggctccgttgggatgaggattaattttggaggggttaccgcacgggagagatgaagaaggactctggcacttctcgcgtttggatgggagtacccatatcgatgggaaatgattagggttctttcaattttggaggggttacacgggCGAGAGAGATGAAGAAAGGAGtccagtgcatccatacgccggagtcctttcttcacatctctctggcccttctcatct	.(((((((((....(((((..(((....)))...)))))..............(((((........((((((...((((........))))...)))))))))))...((((.((((........))))..))))((((((((...((((((.(((((((........))))))).)))))).((.....)).(((((...((((((((((((((.((((((((.....(((((....)))))..)).)))))).)).))))))))))))..))))))))))))).....((((.((((((((((((((((((.(((.(((........))).))).)))))))))))..))))))).)))))))))))))
novel-m0012-5p	novel-m0012	Unigene0003113	189	271	-	83	-23.4	45.78	0.62	TGGTAGATGGTGTAGCTTCATA	22	5p	cacccaccaaTGGTAGATGGTGTAGCTTCATAtcagaaaaaaccacccattccagggaagaagccaccatctccaggaataaa	......((..(((.((((((((..(((((................(((......)))..))))))))))))))))))......
novel-m0013-5p	novel-m0013	Unigene0003164	253	382	+	130	-49.9	50.77	0.76	TTCCGAGGATCAGTCAAACTATC	23	5p	ccttcggacgTTCCGAGGATCAGTCAAACTATCcgttgcagggtcaaaatagttgttgtaatatgaccgttgggtatccgaccgttgcaacctcagaaggtccgagacccatcttcggaaggtccgaaga	.((((((((.((((((((((..(((..(((.((.((((((((((((.................)))))(((((....)))))..)))))))....)).)))....)))..)))))))))).)))))))).
novel-m0014-5p	novel-m0014	Unigene0003257	132	222	-	91	-24.4	36.26	0.74	CTCTAAGAGGCTTGGACACCT	21	5p	tgccaaggagCTCTAAGAGGCTTGGACACCTtggtcatcaaaaaaataaaataatagaggtgctcctaagtttctatgtttaaaatggtaa	(((((..((((....(((((((((((((((((........................)))))).))).))))))))..))))....))))).
novel-m0015-3p	novel-m0015	Unigene0003394	73	152	+	80	-19	42.5	0.56	TAGGCAACTGAGAGCATTGTG	21	3p	aaatgtgaaaataatgaactacagctgatctggtctactatgtggtaccTAGGCAACTGAGAGCATTGTGcctcaactcg	.....(((..((((((..((.(((.((.((((((((((...)))).))).))))).)))))..))))))...))).....
novel-m0016-3p	novel-m0016	Unigene0003487	732	823	+	92	-37.2	44.57	0.91	GTTCAAACCATGGGAGCTCCA	21	3p	ttgtaatatgtggggttatcccaattggtttggaagcaagatctctagagggaggtcttaaGTTCAAACCATGGGAGCTCCAatgaaaggcc	..........((((((..(((((..(((((((((...(((((((((....)))))))))...))))))))))))))))))))..........
novel-m0017-5p	novel-m0017	Unigene0003642	236	395	+	160	-52.4	38.75	0.85	CCACTTTGGATGGCCGAACCC	21	5p	tagggttcggCCACTTTGGATGGCCGAACCCcatgaaatgttttggttattttgatggtttttggaagttaaaaaccatgcaatgttatggaagttcttaggtgttttaattggagttaagattgatgttttgggttggccattggatggctgaactata	...((((((((((..((.(((((((.((((((((.((...((((.((.((.(((((((((((((.....)))))))))).))).)).)).)))).((((((.(.(.......).).)))))))).)))....)))))))))))).))))))))))))...
novel-m0018-5p	novel-m0018	Unigene0003642	905	1104	+	200	-74.5	42.5	0.88	CCATGTTGTATGGCCGAACCC	21	5p	tgaggttcggCCATGTTGTATGGCCGAACCCcactaaggtggatttatggtggaccttgattattaagcaaaaattaaacaagggttagttagtggcaaaaccgtaaatacaagttataatggaatgaaggattaaaggacttgaaagaggggtcaaaccaaagtggtatggttcggccatgctgtatggccgaacccta	...((((((((((((..((((((((((((((((((..(((.((((((((((...(((((.(((............))).)))))((((.....))))...)))))))...((((((.((((..........))))...))))))........)))..)))..)))))...)))))))))))))..))))))))))))...
novel-m0019-3p	novel-m0019	Unigene0003903	58	151	+	94	-28.5	56.38	0.54	TTCAGATCCTCGGGCCTCCCG	21	3p	tttccagcactggtgattgcactggtgatctcgctaatctggcgtcccaatgcgcgcagtttgTTCAGATCCTCGGGCCTCCCGttgctcctga	.....((((.(((.((..((.((((.(((((...(((.(((((((......)))).))).)))...))))).)))))).))))).)))).....
novel-m0020-5p	novel-m0020	Unigene0004020	794	1034	+	241	-61.3	43.98	0.58	AAGAGAAGACGAAGAAAAAGAA	22	5p	gaagacgaagAAGAGAAGACGAAGAAAAAGAAgagaagaagaagaagaaaagcatacctggataagacggagaagctgcagaagatgcgaaggcttggagaagagcagagtcgcagcagagagcgagagcagaggagagccggagaagccaagagggtaggtggaaaatatcgaaaggaagatagggttgtcatttgtttcgattttttttttttttccgttttttccccttttctctttc	.........((((((((((.(((((((..((((((((((((((........((.(((((((......(((.....((((......(((((..((((......))))....)))))((.....))....)))).......)))......))....))))).)).......(((((((.(((((((....)))).))).)))))))))))))))))))))..)))))))...)))))))))).
novel-m0021-3p	novel-m0021	Unigene0004052	239	323	-	85	-19.5	47.06	0.49	AAAATTTATTGAACCTGACCC	21	3p	agggctgaaactcgggttcgatcaggttttactaagcccaatccaacccatgtcAAAATTTATTGAACCTGACCCaatccgaccc	.((((.((...(((((((((((.(((((((((...................)).)))))))))))))))))).....)).).)))
novel-m0022-3p	novel-m0022	Unigene0004258	104	220	-	117	-32.4	42.74	0.65	TTGGCCGTGATCTTTTATGAT	21	3p	acatgcggcatgatgatagagatgatgcatagtaggcatggcattaagtatgtcatcttcatattcatgtgatgggtatggaggtaTTGGCCGTGATCTTTTATGATgaccacgacg	...((.(((((.((((..(((((.(((..(((((...(((((((.....)))))))((((((((((((...)))))))))))).)))))..))).))))))))).))).)).))...
novel-m0023-3p	novel-m0023	Unigene0004373	1166	1426	+	261	-105.4	27.59	1.46	TTTACCATTTGTAACATCACC	21	3p	gatgtgaatttggtgatgttgcacatgttaaaaaccttaaggcaaaattttgattttccatattttataaatttgatgtaaaaagcaaataagcaactactatgtattgctccgcatcaactttattttggttaacaattgtaaatccacacgcctacatcagtactgttccaatatgtttttacatcaaatttataaaataaggaaaatcaaaattttgacttaaggttTTTACCATTTGTAACATCACCaaattcatat	.((((((((((((((((((((((.(((.(((((((((((((.(((((((((((((((((.((((((((((((((((((((((((.......((((..(((((((((..((...........(((((.(((.....)))..))))).......)).))))).)))).))))........)))))))))))))))))))))))).))))))))))))))))).))))))))))))).))).))))))))))))))))))))))
novel-m0023-5p	novel-m0023	Unigene0004373	1166	1426	+	261	-105.4	27.59	1.46	TGATGTTGCACATGTTAAAAA	21	5p	gatgtgaatttggTGATGTTGCACATGTTAAAAAccttaaggcaaaattttgattttccatattttataaatttgatgtaaaaagcaaataagcaactactatgtattgctccgcatcaactttattttggttaacaattgtaaatccacacgcctacatcagtactgttccaatatgtttttacatcaaatttataaaataaggaaaatcaaaattttgacttaaggtttttaccatttgtaacatcaccaaattcatat	.((((((((((((((((((((((.(((.(((((((((((((.(((((((((((((((((.((((((((((((((((((((((((.......((((..(((((((((..((...........(((((.(((.....)))..))))).......)).))))).)))).))))........)))))))))))))))))))))))).))))))))))))))))).))))))))))))).))).))))))))))))))))))))))
novel-m0024-5p	novel-m0024	Unigene0004480	17	232	+	216	-40	28.24	0.66	TTTGATTTGAGACTTTGAGAA	21	5p	ttggttgttaTTTGATTTGAGACTTTGAGAAggttgtttattcatttatttttaatttgtggaaacttggataataaattcaagtatggattaattttgataacgctttaatttgattcttatgggaatgtgagtaagtgatgcgtttagagatccttatgtgagtgatatttatccctttaagttatttagaagctcaaatgagatgttatgtct	........(((((.(((((((..((((((...........(((((..(((...)))..)))))(((((((((((...(((((.(((.(((((...(((((..((((....((((.((((.(((....))).))))))))...)))))))))))))).))).))))).....))))))....))))).))))))..))))))).)))))........
novel-m0025-5p	novel-m0025	Unigene0006093	54	234	-	181	-62.8	39.23	0.88	TGAGATACGAAGTGGATGATC	21	5p	ggtatgactaTGAGATACGAAGTGGATGATCtctctggaggaatatccaaggcaattcttgggccaaggcattccttgtatcccttcctcagtatccattccctttttatcatttctgcttctcgcagatgttcttaatatttcttgaaggagattatccacttcatatctcatacataaa	..((((..(((((((((.((((((((((((((((.(.((((((((((((((......)))))..(((((....)))))....................................(((((.....)))))........))))))))).).)))))))))))))))).)))))))))))))..
novel-m0026-5p	novel-m0026	Unigene0006369	160	269	-	110	-47.2	41.82	1.03	TGGAGAAGGATGGAGTAGAGAG	22	5p	tgatttcttcTGGAGAAGGATGGAGTAGAGAGaagacatggcttgcattcttatcgaacaataagtaagcaaactcactctctcttctcatccttctccagatgaactcc	.((.(((.((((((((((((((.((.(((((((.((....((((((..................))))))....))..))))))).)))))))))))))))).))).)).
novel-m0027-5p	novel-m0027	Unigene0006560	51	401	-	351	-93	43.59	0.61	CAAAGCGGACAATATCACACT	21	5p	atagtgggtcCAAAGCGGACAATATCACACTaggaagttggggtagggtcgttacaagttaggagttcatgggggtttagtggaaggggattctaaggtagttgttgggtgggcattgagatctcttagttcgtgatatttttagacaaaatcgaaaggattcggcattccattgtggcttatgatttaagattgcttgggctcctcggtcagctaactcagcttctgatgagatggaacgttaggggttgtctctatctacaaaaaatgtaactaaattcttgtgatgggttgggaggggtttttgtggtttgtttcgtatggtgggttgcttttggcatgcctttctac	...(((((.(((..((((((((.((((((...((((.((......((.((((((((((.....(((((((.....(((.(((((.(((((.....((.(((((((((((.((((.(((((...((((((.((((((.............((((.....))))(.(((......))).).)))))).))))))...)))))))))))))).)))))).))((((((((((((........))))))))))))))))).))))))))..))).)))).....)))))))))).)).....)).))))))))))))).))))).))).((((((((...)))).)))).)))))
novel-m0028-5p	novel-m0028	Unigene0006583	153	448	+	296	-70.6	39.86	0.6	TACCATCAGGTAGGCTTCTGA	21	5p	aaattccaaaTACCATCAGGTAGGCTTCTGAtgcgattgtttcttacatctagagtctgtaagttgtaaaggtcgccaattgtagagggaaggctatccaagtcagcatttcttagccccaaatatctgagatggattagcaatccaattttttcaattgacttggaccttatgtctactccataaagactcagtactctaagaaacttgaaacacctatgaaccgactttgattcgataactccatcaaaacacaacaaggaacggaggtgtgcagatgtcctattgagggaaac	...((((.((((.((((..(((.(((((((.......((((((.....(((((((((((...........((((.......(((((.(.((((...((((((((((....((((((..........))))))((((((...))))))..........)))))))))))))).).)))))........))))))).))))).))).....))))))(((.((.......((((((..((....)).))))))......)))))..))))))).))).))))...))))..))))...
novel-m0029-5p	novel-m0029	Unigene0006646	873	987	-	115	-47.4	49.57	0.83	CCATGTTGTATGGCCGAACCC	21	5p	ggtggttcggCCATGTTGTATGGCCGAACCCcattgagggatgtttgttgaacatgaatacacttaagaggaaatgggaccatagggttcggccatgttgtatggccaaacccca	((.((((.(((((((...(((((((((((((..(((((.(.(((((((.....)))))))).)))))..((........))...)))))))))))))...))))))).)))))).
novel-m0030-5p	novel-m0030	Unigene0006697	973	1070	+	98	-18.1	43.88	0.42	TCTGGATAGGATCACTTCTTTC	22	5p	ggaagctcgaTCTGGATAGGATCACTTCTTTCttcatgggtgatacttaaagcaatctggttcccaaagatgtctctagtctggatgatcagtgtctc	(((.(((..((((((((.(((..((.((((......((((......................)))))))).)).))).))))))))....))).))).
novel-m0031-5p	novel-m0031	Unigene0006697	1067	1155	+	89	-20.4	31.46	0.73	ATAGATTGTCCAATGTTCAAAAT	23	5p	tctcgaactgATAGATTGTCCAATGTTCAAAATtgtcttcacagagtaattgtgttaacatctgaatattgaacaaattatgtctgagt	.((((.((..((((.((((.(((((((((....(((...(((((.....)))))...)))..))))))))).)))).)))))).)))).
novel-m0032-3p	novel-m0032	Unigene0006811	264	407	+	144	-26.7	31.94	0.58	AGAGATGCTTAGAATATTCTAG	22	3p	ctctagaatcatgtggaatattgtagaaatgtctaaaagtgtgtagaagtttatagaaaaatgtagaatggtgtagaagcttatagaaaaatgtagaatggtgtagaagtgtAGAGATGCTTAGAATATTCTAGagtgtctagg	.((((((..(.(.(((((((((.(((..((.((((....(.((((....((((((......((((....(((......)))))))......))))))....)))).)....)))).))..))).))))))))).))..))))))
novel-m0033-5p	novel-m0033	Unigene0006814	2425	2512	+	88	-18.3	40.91	0.51	TTCATGGACGTTGATAAGATCCT	23	5p	tgatttctcaTTCATGGACGTTGATAAGATCCTtccatttagcagcaccttaggatggcataaccttaacgttaatggcgaggttcaa	(((..((((..((((.((((((((....((((.(((................))).)).))....)))))))).)))).)))).))).
novel-m0034-3p	novel-m0034	Unigene0006814	2852	3054	-	203	-59.5	52.22	0.56	AGAACGTAAGCTAGTGATGCTT	22	3p	ccactgcttgggagctcacggtttcatgttctatttcactccccgatgggggttcttttcacctttccctcacggtactacttcgctatcggtcacccaggagtatttagccttgcaaggtggtccttgctgattcacacgggattccacgtgccccatgctactcgggttAGAACGTAAGCTAGTGATGCTTtcggctactg	.....(((.(((((((((((((((.((((((((.........(((.((((((..............)))))))))............(((((.((...((((.(((((.((...)).))))).)))))))))))...((((((...)).))))(((..........))).))))))))))))).)))).))))))))).....
novel-m0035-3p	novel-m0035	Unigene0006827	631	927	+	297	-94.7	39.06	0.82	CCATGGTGTATGGCTGAACCC	21	3p	catgaaccatgggttcgaccatggtaaatggccgaaccctatggtgatgtaatggtgatcaaatgatgagtttaaaggatggaaaagatagattaatgtgttaatgagttagggtttcaaatgaacaaatgtagtgatccaaatggggttaagagtggtggtttaaaagtgtgatttaaaccacctcaaggactgatttattttggatctaaatggtgtaaatagatccaagaaaaaaaaatggggaaaggacaccattggttcggCCATGGTGTATGGCTGAACCCatggcccaat	..((..(((((((((((.(((((....(((((((((((..((((((........(.(((((....((..(((((.....(((((..(((..(((((....)))))..)))....)))))..)))))..))....))))))((((..((((....(.(((((((((((.......))))))))))).)...)))).)))).(((((((((((...........)))))))))))...................)))))).)))))))))))....))))).)))))))))))..))..
novel-m0036-3p	novel-m0036	Unigene0006898	384	587	+	204	-70.1	45.1	0.76	TCATCCATTCGCCACCTAAAT	21	3p	acgaaaagcctcacgacgatttaggtggcgaatggatgacaagatggccaaaaatcccatccttcagaaacccagtttattaaaaaaaaccaaaaagaagacgaagaagcctcattgacgttgcctccattgttgccttcagtcaccatacttcgccatctcgTCATCCATTCGCCACCTAAATcgttgccatccttctctgct	.............(((((((((((((((((((((((((((.(((((((..........................((((........)))).........(((((((..((..((.((..........)).))..)))))).)))..........))))))).)))))))))))))))))))))))))))...............
novel-m0036-5p	novel-m0036	Unigene0006898	384	587	+	204	-70.1	45.1	0.76	TTAGGTGGCGAATGGATGACA	21	5p	acgaaaagcctcacgacgatTTAGGTGGCGAATGGATGACAagatggccaaaaatcccatccttcagaaacccagtttattaaaaaaaaccaaaaagaagacgaagaagcctcattgacgttgcctccattgttgccttcagtcaccatacttcgccatctcgtcatccattcgccacctaaatcgttgccatccttctctgct	.............(((((((((((((((((((((((((((.(((((((..........................((((........)))).........(((((((..((..((.((..........)).))..)))))).)))..........))))))).)))))))))))))))))))))))))))...............
novel-m0037-3p	novel-m0037	Unigene0006927	113	254	-	142	-74.9	37.32	1.41	TTCAAAGTGGGCTCCATATAGAGG	24	3p	tatgcacacctctatttggggctcactttgactttgtgtaataggtacattaagaagacctatatttaaagtgagccctatattaattttaatgtacctattacgtgagTTCAAAGTGGGCTCCATATAGAGGtgtgcatgg	(((((((((((((((.((((((((((((((((((..(((((((((((((((((((.....((((..............))))....))))))))))))))))))).))).))))))))))))))).))))))))))))))).
novel-m0037-5p	novel-m0037	Unigene0006927	113	254	-	142	-74.9	37.32	1.41	TCTATTTGGGGCTCACTTTGACT	23	5p	tatgcacaccTCTATTTGGGGCTCACTTTGACTttgtgtaataggtacattaagaagacctatatttaaagtgagccctatattaattttaatgtacctattacgtgagttcaaagtgggctccatatagaggtgtgcatgg	(((((((((((((((.((((((((((((((((((..(((((((((((((((((((.....((((..............))))....))))))))))))))))))).))).))))))))))))))).))))))))))))))).
novel-m0038-5p	novel-m0038	Unigene0007032	53	229	-	177	-25.1	41.24	0.34	TTTCTATATTCGACATAGCGCG	22	5p	tcgaaataatTTTCTATATTCGACATAGCGCGagagataaaataaagtatagacggatcggttcagtgagggatgcagcggatggagaggaaggaaagagttccaagagaaagtataggaaaaaacgccatggaagaatcgatttagagaggtatgcggtatagagagaggaaggaa	.........((((((((((.((.((((.(.(.......................((((((((((......((.(.((.....)).)..((((........)))).......................))......))))))))))...).).)))))))))))))))).........
novel-m0039-3p	novel-m0039	Unigene0007033	243	355	+	113	-55.7	40.71	1.21	CCGTTCCCTCGTATTCTTGAAA	22	3p	ccccatgacaatatgtggtttcaagaataaatgggaatggaatggaatgggttgaatgaacttggatttagacattccattCCGTTCCCTCGTATTCTTGAAAccgaatgggt	.(((((..........(((((((((((((...(((((((((((((((((..((((((........)))))).)))))))))))))))))...)))))))))))))..))))).
novel-m0040-5p	novel-m0040	Unigene0007563	71	152	-	82	-28.3	52.44	0.66	TTATCAGAACCGGACCAAACC	21	5p	aaaagcaatgTTATCAGAACCGGACCAAACCacgactgaactgcgtggtctgcggttcggtttgggtaaaaaaccggccggc	....((....(((((.((((((((((..((((((.(......)))))))....)))))))))).))))).......))....
novel-m0041-3p	novel-m0041	Unigene0007639	68	218	-	151	-46.2	50.99	0.6	CTTGAGGTGGAGGGCCCAAGCT	22	3p	tggtcggctagtatgcttgatcaagatgagaaacccccaagcttgggttcggccatggtagggtttgatttgagagagagaagggaggagaggataaagagatgtctagtttccttggcCTTGAGGTGGAGGGCCCAAGCTtagccctttc	((((((((......)).))))))......((((...(.((((((((((((..((((..(((((((...................((((((((((((......)))))..))))))))))))))..)))).)))))))))))).)...))))
novel-m0042-3p	novel-m0042	Unigene0007825	263	380	+	118	-29.1	49.15	0.5	TCCGAGAGTTGAACCGTGCTC	21	3p	ttcgtgactttgggtacggatcatcactatcccaccacattatcctagagtcgccctcggctctgaaacttaacttctcactcatggTCCGAGAGTTGAACCGTGCTCtgacaacgtt	..(((......((((((((.(((..(((.((..((((........((((((((....))))))))...................))))..)).)))))).)))))))).....)))..
novel-m0043-3p	novel-m0043	Unigene0007902	315	408	-	94	-25.6	48.94	0.56	CTGTCCACATGGTTGCAGCCT	21	3p	aaaccatggaaaaggctaagcccatgttgagaggattactatctccaccttctaagcgaagtcCTGTCCACATGGTTGCAGCCTcacctgaagc	....((.((...(((((..(.((((((.((.((((.............((((.....)))))))).)).)))))).)..)))))..))))....
novel-m0044-5p	novel-m0044	Unigene0007971	417	502	+	86	-36.4	47.67	0.89	TGCGTATCGGCCAAGATATCT	21	5p	gccgagactgTGCGTATCGGCCAAGATATCTcggccataaaaaactcgagatatctcgactgatatgcacaatagagttgtgggct	(((..(((((((((((((((.(.(((((((((((...........))))))))))).).))))))))))).....))))...))).
novel-m0045-5p	novel-m0045	Unigene0008023	24	283	-	260	-43.7	40	0.42	TTTGTCACCATCTTCAAGAAGA	22	5p	tcctaactcgTTTGTCACCATCTTCAAGAAGAtcggcctggttgttaatctctttccaccttgctagagtttctgctacagaattgcttccattggatctgcttcgtgctctcttcctttccctctccatcatgaagtctttctttcttctttctttctttcaaatttcagtatggaacagatcaatttctttgccagataagcagattgtttcctctttcttttctttctttcttgcagacaaagacagggagatcgat	......(((.((((((....(((.(((((((...(((..(((.(...........).)))..))).(((((((((...)))))..))))......((((((((((..((..........((....(((((..((((((..........................))))))..)))))...))...........))..))..)))))))).....................))))))).)))....)))))))))......
novel-m0046-5p	novel-m0046	Unigene0008367	48	119	+	72	-37.6	61.11	0.85	TAGCTCAACTGGTTGCCTCCC	21	5p	cacatggggtTAGCTCAACTGGTTGCCTCCCgccttaggaagcgggaggttgcgggttcaagccctcatggc	..(((((((...(((.((((.((.(((((((((........))))))))).)).))))..))))))))))..
novel-m0047-5p	novel-m0047	Unigene0008811	383	522	-	140	-46.4	57.86	0.57	TCGGCCCTGAGAGCGATTCCCG	22	5p	ggtggtcaaaTCGGCCCTGAGAGCGATTCCCGatagctgcgtttcctaccccgaatttgtgcagatcgtcgagagctgcacggattctaagaatcccaacgaggtgccggagctcgtgaaggcgctggatgaatccggcg	(.((((((..((((((((....((((((((.(.((.((.((((.........((((((((((((.((.....)).))))))))))))..........)))))).))).)))).))))..))).))))).)))..))).).
novel-m0048-3p	novel-m0048	Unigene0008981	2536	2829	+	294	-112.4	59.86	0.64	ACTGGGCTGGGCGGGCGAGGCT	22	3p	ttttgtcactcttctgaagcggtatggggcctctctgagaactaggggagggcgagcccgggcccagccaggagactcggactcggatctgatgagcgaaattccttcttcagagaatcttcttgatcccgagacgctgacggctttgttgagtatcaaagccgggccccccggaatgacctgtgccgcggccccgcaccccagactccacgattcccctcttctgaggacgaaggtctcgatcctgaggcactgggtaagtACTGGGCTGGGCGGGCGAGGCTggggatttct	......(((...((.....(((...((((((..((((((......((..((((........))))..))......))))))(((((.(((((.(((.((...)).))).)))))..(((.....))).))))).......((((((((........)))))))))))))))))....))...)))((.(((((.(((.((((((.(.(((..(((.(((...(((.(((((((.....))).)))).)))....)))..)))..))))))))).).))).))))).))......
novel-m0049-3p	novel-m0049	Unigene0009119	1716	2059	-	344	-101.5	64.53	0.46	ACTGTTATTGGAGTTGTCGCTG	22	3p	ccgccgccggctgcggtaactcctgttgcatctcctccaccgccggctgctgtaactcctgccgcatccccgccgcctccgccggcgtcggtatcttctcctcctcctgcgaaaggatcctcaccgcctcctccggctaccggctcgtcttctcccccgccgccggcatctgtgtcttctcctcctccaccggcttccgtatcttctcccccgcctccgagatcgtcatcttcgacaccctcttccaataggtcgccgcctccaccaccgcctccttcggcaggctcatcgagcaaggccatagcgtcagggACTGTTATTGGAGTTGTCGCTGctggcgttat	....(((((((.(((((((((((.((.(((((.(((....(((.(((((((......(((((((.....(((.((((......)))).))).............((((.....))))........(((......)))..(((((.((..........))..))))).....(((.............)))((((..((......((((..........))))..(((......)))..............))..))))...................))))))).......)))..))))...)))..))))).))).)).))))))))))).)))))))....
novel-m0050-5p	novel-m0050	Unigene0009197	34	186	+	153	-67.1	35.95	1.22	TATCGGCCGATATTTTGATAT	21	5p	ttttttaagaTATCGGCCGATATTTTGATATcgaccgatatgatacggccgatattttgatatcgaccgatatgatacggccgatatttcagctgatattgtgaatatcggccgataatgatatatatcggccgatattcatagcttaaaaat	.(((((((((((((((.(((((((..(((((((.(((........))).)))))))..))))))).)))))))....((((.((....)).))))...(((((((((((((((((((........))))))))))))))))))))))))))).
novel-m0051-3p	novel-m0051	Unigene0009655	284	392	-	109	-30.7	46.79	0.6	TTGTGTTGCTTGTGTAGACCC	21	3p	atattgtggacgggttgttacatttggtatgaaagcacggttcaacacgaggactgtgtgagcctctacccttttgtgTTGTGTTGCTTGTGTAGACCCctcgtcaatg	.(((((..((.(((((..(((((..((((....(((((((((((.((((.....))))))))))...........)))))....)))).)))))))))).))..)))))
novel-m0052-3p	novel-m0052	Unigene0009779	20	129	-	110	-25.5	50	0.46	TCCCTTGGCTGTGGTTTCGCT	21	3p	ctctcatgtctccttacaatgccagactagagtcaagctcaacagggtcttctttccccgctgattttgccaagcccgtTCCCTTGGCTGTGGTTTCGCTagatagtaga	.(((..(((((.........((.((((((.(((((((...(((.(((.(((........((.......)).)))))))))..))))))).)))))).)).)))))..)))
novel-m0053-3p	novel-m0053	Unigene0010059	460	537	-	78	-22	39.74	0.71	TGTTGACTTGGTCGTTCGGAA	21	3p	ctaatccatgttctacacggccaaggaagcatcgttttttaatctaaTGTTGACTTGGTCGTTCGGAAgagaatcttt	........(.((((..(((((((((..(((((.(((....)))...)))))..)))))))))..)))).)........
novel-m0054-5p	novel-m0054	Unigene0010077	1127	1198	+	72	-33.9	51.39	0.92	GATTTAGCTGTAGAACCTGCAAC	23	5p	aatggggcctGATTTAGCTGTAGAACCTGCAACtgggatgtcgggttctgcagctggcattagcttctcatc	.((((((.(((((((((((((((((((((((.......)).)))))))))))))))).)))))..)))))).
novel-m0055-5p	novel-m0055	Unigene0010082	2469	2699	+	231	-49.6	36.36	0.59	CAACCGACTGCTGTCTGATT	20	5p	tgaatgactaCAACCGACTGCTGTCTGATTctttctctgtacttgctgatttgttgcattcacagcctctgtttctgttattggcagaaagccagaaagagaatgctgtttttaattttggaacgtgtaagatttcctttgtctatacctttcagaaaaaagaaaaaagatttcctttgttttaccttctttagtagatgcagtagcaggattgccttgtctagttaactt	....(((((((((.(((((((((.(((..(((....((((...(((.........)))...))))..((((((((((((...))))))))..))))(((.(((..((.(((((..((((((((.(((((.(((.......)))))))).))))))))....))))).))..))))))..................)))..)))))))))..)))..))))..)))))....
novel-m0056-3p	novel-m0056	Unigene0010543	189	447	-	259	-51.3	41.7	0.47	CTGGGCAATGTCTGAAGAGAA	21	3p	tccagaacttccttcacattgtctagcctgttagctttaccatcatatgatttatgctccttccaatagaatcccatagaacggagcaacaacttgtccttgagttttgattttgtagcattatcaacatcgcctacattctcaagttcatctattcttatgtcccctcgaagttgtagtttttccagctcttctatgccacatccgctctctttgcccacgatgaatCTGGGCAATGTCTGAAGAGAAgtcaactgtc	..(((.((((((((((((((((((((...............(((....)))...(((((((((...............))).))))))((((((((..((((((.........((((((............).)))))..))))))..)).....................))))))..........((........))..((((.((.......))....))))...)))))))))))..)))).)))))...)))..
novel-m0057-5p	novel-m0057	Unigene0010637	104	297	+	194	-94.9	39.18	1.25	TCCGTGCACCATGAGTTTTCA	21	5p	agggtaatgaTCCGTGCACCATGAGTTTTCAccatggtgcacctacctttaaaaggaaaagaccattttgccattgcttttcttttcttctcttcttctctctcttccctctttcaaaaaaagaggggaaaatggtcttttcctttttagtagtgcactacagtaaaactcatggtgcacagatcattatccta	((((((((((((.((((((((((((((((.((..((((((((.(((....((((((((((((((((((.((....))...........................((((((((((.....))))))))))))))))))))))))))))..)))))))))))..)))))))))))))))))).)))))))))))).
novel-m0058-5p	novel-m0058	Unigene0010679	1591	1779	-	189	-91.1	48.68	0.99	CTCCAGGGAGGACGCTTCACACC	23	5p	ggtgattagcCTCCAGGGAGGACGCTTCACACCcctagcccctttgatagcgttggaagaatcgctttcagttactaatttaactcccccaaggctcacccccaaggtaaactggttattgaaggggatttggctaatgctttcaaatgggcatagggattgaggcgtcccccatggagaatgattaat	..((((((..((((((((.((((((((((...(((((((((.(((((.((((((((..(((((.((((((((.((((.((((...((.....((....)).....)))))).)))).)))))))).)))))..)))))))).))))).)))).)))))..))))))))))))).)))))..))))))..
novel-m0059-3p	novel-m0059	Unigene0010736	159	308	+	150	-50.7	42.67	0.79	GGGAGAGGATGGAGAAGGAAG	21	3p	tagggttccgtttggggaattagatcttctttctcttccttcttctttttatctcttctctttccttcttatcagaatgcagctattgaaaacgcttatcttctcatttgctggaaagaGGGAGAGGATGGAGAAGGAAGcggaagccgc	..((.(((((...(((((......))))).....(((((((((((.(((..(((((.((((((((..(..((.((((...(((..........)))....)))).))..)..)))))))))))))))).)))))))))))))))).))..
novel-m0060-5p	novel-m0060	Unigene0010850	21	94	+	74	-21.7	40.54	0.72	AAATGATAAGGTTCAGTGGACT	22	5p	tccttcctctAAATGATAAGGTTCAGTGGACTtcttgtgatgtccacggcgacgaacttgttattttggatttt	....(((...(((((((((((((..((((((.((....)).))))))...)))...)))))))))).)))....
novel-m0061-5p	novel-m0061	Unigene0010863	933	1001	-	69	-21.3	42.03	0.73	TAACCAGCACTGAAAACCGTC	21	5p	tgtaactggaTAACCAGCACTGAAAACCGTCtttatattggatggttcggtgttttgatgatccctacc	.(((...((((...(((((((((..(((((((.......))))))))))))))..))...)))).))).
novel-m0062-5p	novel-m0062	Unigene0010942	459	670	+	212	-60.2	42.92	0.66	CTCTAAGAGGCCCTGGACACC	21	5p	tagtagggttCTCTAAGAGGCCCTGGACACCccagtcatcaaaaaagaagaagaaaaggagctaaaataatccatgtaacttgcattcacctcaaggattggccacccaccctttatcttgttttttttatgcctttcaatggcctaaggaaaaagccctattgggggaggttttggggattttgtggctatcattttggggaactctagag	...(((((((((((((((((((.((((..((((((((.((......)).))......(((..........)))(((((...)))))..(((((((((..(((....))).)))).......(((((((((.(((.......))).)))))))))..(((....))).))))).))))))..)))).))))....)))))))))))))))...
novel-m0063-5p	novel-m0063	Unigene0010973	75	292	-	218	-42	29.82	0.65	TATTATCATCCAAGTGCTGCT	21	5p	agaaatacttTATTATCATCCAAGTGCTGCTgtcagaaaattacagtaacttccttccaagaacataaacttagttattattatacttttttttttggaggggttgaagctctacatggtctatcaatttgtaaatcaaaattctgtatgtgacttatgtttggagaagtttatatggttgaaatcaatagtactatggaggaagataacaatgttaa	.........(((((.((.(((((((((((.((......(((((.(..((((((..(((((..(((((.....((((((....((((......(((((((.(((((((((.((.....)).)).))))))).)...))))))....))))))))))))))))))))))))))..).))))).....)).))))))).)))).)).))))).........
novel-m0064-3p	novel-m0064	Unigene0011214	141	263	-	123	-34	44.72	0.62	TTTAATCAGATCGGACCGAGA	21	3p	agccgtggctcacggctcacgactgaattaaaaaaaccgatttaaaccgcggcttgaaacggttttttgcggcttaatttatctgaaggtttTTTAATCAGATCGGACCGAGAagatggcggt	.(((((.((((.(((.((.(((((((.((((((((.(((((((((.((((((((......)))....))))).))))...)))....)))))))))))))).)))))))).).)).).)))))
novel-m0065-3p	novel-m0065	Unigene0011215	1221	1340	-	120	-28.2	42.5	0.55	TTTAATCAGATCGGACCGAGA	21	3p	cgcggctcacggctcacgattggattaaagaaaccgatttaaaccgcagcttgaaacggttttttacggcttaaattatcagaaggtttTTTAATCAGATCGGACCGAGAagatgactgt	.((((.((((((.((.(((((.((((((((((.(((((((((.(((.((((......)))).....))).))))))).......)))))))))))).))))))))))......)))))))
novel-m0066-3p	novel-m0066	Unigene0011355	445	554	+	110	-32.7	40	0.74	TTACTGTTGCATCTCGAAGGA	21	3p	aagaacctatgatgaggagtccttcgacgacacaatcagtatattgatcatacaaaagttcatgcagtttatttaggggTTACTGTTGCATCTCGAAGGActcaggttct	.(((((((........(((((((((((.((..(((.(((((..((((....((.............))....))))....))))))))..))))))))))))))))))))
novel-m0067-5p	novel-m0067	Unigene0011404	101	345	-	245	-42.5	36.33	0.48	ACTGGACCAATGATTTGAGCAAT	23	5p	tacatccagtACTGGACCAATGATTTGAGCAATacgccccaggtttttttcttcaagtgtggaaaccccaggaccagaagtagtaggattaattctcataatcataataaataataaaatatgtcgaaattttttgcgaatattaccgaatccaaataaatgtccgatagcaagttgatcggttaattcaataaataataaatgggagttagcgcttgagttcgttggtaccatccaaccaaccg	............((((((((((((((((((..((.((((((.........((((..((.(((.....)))..))..))))......(((((.......)))))..............(((((.(((.((....)).))))))))(((((...(((.....(((......)))..))).)))))...................)))).))))..))))))).)))))))).)))............
novel-m0068-3p	novel-m0068	Unigene0011565	739	988	-	250	-114.8	56.4	0.81	TGGACCACCAAGCCCTTTTGG	21	3p	aagaactccccgccaaaagggcttgctggtccgtcaagcaccttcggcgttgctgcaaccttcgccgtctgctgtctccccagcctttgctgcttccgccgctgtttgttctgggagaaacccagatctccttgatgctcggcagatttgtgaacggaagacactcaaatcgtgcatatcctcttcgttgcccaacttccatcgaccgacggtgctcgaTGGACCACCAAGCCCTTTTGGcgggagttct	.(((((((((.((((((((((((((.(((((((((.((((((.(((((((((..(((((.(((((.((((((((((((((.(((....((.((....)).)).....)))..)))))).....(((((.....))).))))))))))..)))))..((((((((.......))).......)))))))))).)))).......).)))).)))))).))))))))).)))))))))))))))))))))))
novel-m0069-5p	novel-m0069	Unigene0011767	5045	5280	+	236	-76.2	41.95	0.77	CCATGTTGTATGGCCGAACCC	21	5p	caaggttcggCCATGTTGTATGGCCGAACCCtaattttatatggaaaccatttgaggactaaaaatggtactagatgaggttcagccacgttgtatggccgaaccccatcaagtgacctaaaacatagttgatgaatatttttaaggaagaacccatcctcaaagtaatataggatgtaaaggagacgaaagaaggaagaacaatgggttcggccatgttgtatggccaaacccct	...((((.(((((((...(((((((((((((....((((.((((...)))).))))(((((.....((((((.((((.(((((.((((.......)))).))))).)))).))).))).......)))))..((((....)))).((.....))((((((...........))))))............................)))))))))))))...))))))).))))...
novel-m0070-5p	novel-m0070	Unigene0011767	5045	5280	+	236	-76.2	41.95	0.77	CCATGTTGTATGGCCGAACCC	21	5p	caaggttcggCCATGTTGTATGGCCGAACCCtaattttatatggaaaccatttgaggactaaaaatggtactagatgaggttcagccacgttgtatggccgaaccccatcaagtgacctaaaacatagttgatgaatatttttaaggaagaacccatcctcaaagtaatataggatgtaaaggagacgaaagaaggaagaacaatgggttcggccatgttgtatggccaaacccct	...((((.(((((((...(((((((((((((....((((.((((...)))).))))(((((.....((((((.((((.(((((.((((.......)))).))))).)))).))).))).......)))))..((((....)))).((.....))((((((...........))))))............................)))))))))))))...))))))).))))...
novel-m0071-5p	novel-m0071	Unigene0011807	675	797	-	123	-56.8	45.53	1.01	TTGTGGGACCCACGCTTCTAG	21	5p	gttgatagtgTTGTGGGACCCACGCTTCTAGtgatgtgaccttcaatatacattgaatctagacatataactggggcccacatcactagatgcgtggatcccacaacagatagtgctatctcc	...(((((((((((((((.((((((.((((((((((((.((((((((....)))))).((((........))))))..)))))))))))).)))))).))))))))).......))))))...
novel-m0072-3p	novel-m0072	Unigene0012590	117	208	-	92	-26.5	29.35	0.98	TTTCAACCATTAAGATCAAGT	21	3p	ccacgtgattttaatggtctaaatcaatgtttcctttaaaaaatttaaagacacctagtgaTTTCAACCATTAAGATCAAGTgactgaaatt	.(((.(((((((((((((..((((((.......(((((((...)))))))........))))))..))))))))))))).))).........
novel-m0073-5p	novel-m0073	Unigene0014929	331	656	-	326	-91	37.42	0.75	AGAGGAGAGAACCAGGTTCGGCC	23	5p	aaAGAGGAGAGAACCAGGTTCGGCCtatgcgatcaactgcacttgatctggacaaatcaggtgtgactagttgcacctggcacatttccttcttttcatttttatttttttccattggtttcactaaaaaccaactctaatagattgaaagtttatttagtggtgaagttgatcttagtggtcaaagtcaatagacgtccttagtttttgaagtttacttgacccttacagttgattttttaattgatttcatgaaattaataaaaggaaatagaccaagtgcaacccatgtgactggatggccctgatctgctctctctctctct	..((((((((((..((((((.((((.((.((.(((...(((((((((........))))))))).....(((((((.(((...((((((((..........(((((..((((..(((((((......)))))))(.((((((((((...)))))).)))).)((((((((((((.....)))))..((((((((((.((..........)).))))).))))).....(((((((....))))))))))))))))))..)))))))))))))...))).))))))).....))).)).))))))..)))))).)))))).))))..
novel-m0074-5p	novel-m0074	Unigene0014962	76	181	+	106	-35.7	48.11	0.7	CTTAATCCTGACTTTGAGCCT	21	5p	attgactggtCTTAATCCTGACTTTGAGCCTattcacgcccaaattttgagcaagagacctcttcctcggtggtgaaggccttagttaggttagggaacggtgagg	.((.((((.((((((.(((((((..(.((((..(((((((........(((.((((....)))).)))))).)))))))))..)))))))))))))..)))).)).
novel-m0075-3p	novel-m0075	Unigene0015466	4506	4730	-	225	-55.1	41.33	0.59	AAGAAGGAGAAGAAGAAGAG	20	3p	ttgctcttttatctcactcagtgctttcttcctcttcttcctccctcccctcccttctcttttgatttctaattaatcaatttatagattcatatcctccatcctccgctctgcctttgttctccttatatgctcttatgtgtgggagtgggagaggaattacgttagaagaagaaaaagaagaccaagatcaagAAGAAGGAGAAGAAGAAGAGcatggggcat	.((((((.............(((((((((((.((((((((.((..........(((((.((((..((((((((.((((........))))....(((((.....(((((((............((.((((((....)))))).))))))))).))))).....))))))))..)))).)))))...........)).)))))))).)))).))))))))))))).
novel-m0076-3p	novel-m0076	Unigene0015467	5754	5978	-	225	-55.1	41.33	0.59	AAGAAGGAGAAGAAGAAGAG	20	3p	ttgctcttttatctcactcagtgctttcttcctcttcttcctccctcccctcccttctcttttgatttctaattaatcaatttatagattcatatcctccatcctccgctctgcctttgttctccttatatgctcttatgtgtgggagtgggagaggaattacgttagaagaagaaaaagaagaccaagatcaagAAGAAGGAGAAGAAGAAGAGcatggggcat	.((((((.............(((((((((((.((((((((.((..........(((((.((((..((((((((.((((........))))....(((((.....(((((((............((.((((((....)))))).))))))))).))))).....))))))))..)))).)))))...........)).)))))))).)))).))))))))))))).
novel-m0077-3p	novel-m0077	Unigene0015911	518	803	+	286	-106	37.41	0.99	CCCACAAACATGCCATGTGTCCT	23	3p	attttaagataagacatgtggcatgtttgtggggcgttagtgtgatcaagtgaaaaggaagtctctttagatcaggctcctactgaagctaagttcaatggagtttctaactacttagtagaagggcatggaatgtatggtcaatactactatatcagtcctctatatttcttgtcttaagatggaataggctgacttttggggcaagattaatttaaagattctaccttttcattttgtggggtcaatgtgcCCCACAAACATGCCATGTGTCCTatttttaaaa	.(((.((((((.((((((((((((((((((((((((......((((((((((((((((.((..(((((((((.(((((((...((((......))))..)))))))((((....))))((((.((((.((....(((((((.......)))))))))))))))))....(((((((((((((.((......))...)))))))))))))...)))))))))..)).))))))))))).....)))))...)))))))))))))))))))))))).)))))).))).
novel-m0077-5p	novel-m0077	Unigene0015911	518	803	+	286	-106	37.41	0.99	GACATGTGGCATGTTTGTGGGGC	23	5p	attttaagataaGACATGTGGCATGTTTGTGGGGCgttagtgtgatcaagtgaaaaggaagtctctttagatcaggctcctactgaagctaagttcaatggagtttctaactacttagtagaagggcatggaatgtatggtcaatactactatatcagtcctctatatttcttgtcttaagatggaataggctgacttttggggcaagattaatttaaagattctaccttttcattttgtggggtcaatgtgccccacaaacatgccatgtgtcctatttttaaaa	.(((.((((((.((((((((((((((((((((((((......((((((((((((((((.((..(((((((((.(((((((...((((......))))..)))))))((((....))))((((.((((.((....(((((((.......)))))))))))))))))....(((((((((((((.((......))...)))))))))))))...)))))))))..)).))))))))))).....)))))...)))))))))))))))))))))))).)))))).))).
novel-m0078-3p	novel-m0078	Unigene0016010	80	177	+	98	-34.4	40.82	0.86	ATTTCGAGACTGCTCAAGCCCT	22	3p	cacggactctttctgtttgagtagtttggaatgaaacgagtaatattattcttcgccgttaatttcATTTCGAGACTGCTCAAGCCCTtggaatccgt	.(((((.(((....((((((((((((((((((((((((.((.............)))))....)))))))).)))))))))))))....))).)))))
novel-m0078-5p	novel-m0078	Unigene0016010	80	177	+	98	-34.4	40.82	0.86	TGTTTGAGTAGTTTGGAATGA	21	5p	cacggactctttcTGTTTGAGTAGTTTGGAATGAaacgagtaatattattcttcgccgttaatttcatttcgagactgctcaagcccttggaatccgt	.(((((.(((....((((((((((((((((((((((((.((.............)))))....)))))))).)))))))))))))....))).)))))
novel-m0079-3p	novel-m0079	Unigene0016109	434	656	+	223	-64.6	40.81	0.71	CCATGGAGTATGGCCGAACCC	21	3p	catgagccatgggttctgccatagtgtatggccgaacaccatgataggttgccatggacatggaagggattaaatgggtaatatttttttatggacttgggttattacaaataatagaggactgctgtttaaatgataagattaatggacttgaaaataaatgggaccaaaattaaaaagggtgaggttcggCCATGGAGTATGGCCGAACCCcacaagttgg	..........((((((.((((((.(.(((((((((((..(((.........(((.(..((((((((((((((......)))).))))))))))..).))).((((((.(((((.(((....))).)))))...))))))......(((.((((........)))).)))............)))..))))))))))).).)))))).))))))..........
novel-m0080-3p	novel-m0080	Unigene0017557	114	207	-	94	-42.1	51.06	0.88	TCCGTGTCGGATACGCACCCG	21	3p	tttaattaattgggtgcgtatccgacatgtatcctagccgtatccaagccgtatccggccttaTCCGTGTCGGATACGCACCCGacaccagtac	.........((((((((((((((((((((.......((((.((.(.....).)).))))......)))))))))))))))))))).........
novel-m0081-5p	novel-m0081	Unigene0018192	72	158	+	87	-31.5	66.67	0.54	TGTCATCCCGGACGAGTTCGTGA	23	5p	tgtccaaagaTGTCATCCCGGACGAGTTCGTGAggctggagagcgagcagcccggggtgaccaccttccacggcccggtcccggagg	...........((((((((((.(..((((((...........)))))).).))))))))))...(((((..(((...)))..)))))
novel-m0082-5p	novel-m0082	Unigene0018314	38	242	+	205	-42.3	40.98	0.5	GCTGTGCTATCTCTCTTCCTC	21	5p	tcttgcatgtGCTGTGCTATCTCTCTTCCTCtcttgccttctttgctactaccagatatccatgtctccacactagggtgtctccatctcccactcaaatacatagaggcgaagataaaaagctgtcattccagaactagctacgactttttgataagagtataatagaaacgaagtgaagaaggaagtattgcaagatggaatt	..((.(((.(((.(((((.(((.(((((((..(((....((((((((.(((..((((((((..((......))..))))))))....................))).))))))))....)))(((......)))..(((......((((((....))))))....)))......)).))))).)))))))).)))..))).))..
novel-m0083-3p	novel-m0083	Unigene0018813	38	173	-	136	-47.9	40.44	0.87	TCAAAGACATGGGTGCCTGAT	21	3p	aagtggtgattcaggcactcatctttttgataaaatgaggtcccctctatggtaggtctcttaatagtgataattgtgcaagaaggcaagtggtgtcttattctaTCAAAGACATGGGTGCCTGATactcatctct	.((.(((((.((((((((((((.(((((((((.(((((((....(.((((.....(((((((.(((((....)))))..))).))))..)))).)))))))).))))))))).))))))))))))...))))).))
novel-m0084-3p	novel-m0084	Unigene0021569	1211	1354	-	144	-48.4	36.11	0.93	AAAAACGCCGATGCCCCTATC	21	3p	atggaattgatagggacattgatgttttttataacaagagacactagacttgtcttttcatccacttgttatcatctatatggtgaaaatgtgcaaaggtgtccattgttgttAAAAACGCCGATGCCCCTATCcattatccaa	.((((((.(((((((.(((((.(((((((.(((((((..((((((....((((.((((((.(((..((........))..)))))))))...)))).))))))..))))))).))))))).))))).))))))).))..)))).
novel-m0085-5p	novel-m0085	Unigene0022400	927	1082	+	156	-47.8	27.56	1.11	CCGAAAATTACTTTGATTGAATC	23	5p	atggcgtttaCCGAAAATTACTTTGATTGAATCaatcaacaatgatttaaattatataagagtttagagataaaaataattttgtgataaaaatgggtaagcttgaaaaacatgacttgattgatccaatcaaggtaatttttggtgggctacata	(((..((((((((((((((((((((((((.(((((((((..(((.(((((.((((.......((((...((((((....))))))..)))).....))))..)))))...)))...))))))))).))))))))))))))))))))))))..))).
novel-m0086-3p	novel-m0086	Unigene0022404	911	1220	-	310	-101.8	54.84	0.6	GGAACTGGGCGTGGACGTGGAAG	23	3p	tctgaatatcggttttatttgtgacggaaagaaaatggcgtcggcgaacccgttcgatctcttgggggacatcgacaacgacgatccctctcagctcatcattgccgctaagcagcagcagcagctcaaagccgctccgaagaaagccttggctccagctgtgcagaagccggctcaggccaaaatgccttccaagcccctttctcctgctcaagcagtgaaggaagcaaagaatgaaatgaatgctggccgaggagggggccgtggtggtggacgtGGAACTGGGCGTGGACGTGGAAGtggattcaat	..(((((.((.(((........))).)).......(.(((((.(((..(((((((.((.(((.(((((((.(((....))).).))))))..((((.....((((.(((....))).)))).))))....((((((.((..(((.((.((((((..(((((.((....)))))))..))))))...)).)))...(((((((((((((((....))))....((.((((..............))))..))))))))))))))).))))))))).)).)))).)))))).))))).)......)))))..
novel-m0087-3p	novel-m0087	Unigene0023724	141	276	-	136	-31	34.56	0.66	TTAGAACACCTGACTAATCCT	21	3p	ttgagacctactattgataaaaaagaatggagtgtctgataggttggttgttttaggtgaatgtggatttttttatttttttgaagactaaggtgtccatgcttcTTAGAACACCTGACTAATCCTtaggtcatgt	....(((((((((((..........))))).......(((.((((((.(((((((((....(((((((.((((..((((....))))..)))).)))))))...))))))))).)))))).)))..))))))....
novel-m0088-5p	novel-m0088	Unigene0024092	775	875	-	101	-38.5	66.34	0.57	CGGACTCCACGGGTTCTCCCT	21	5p	ccaccccgtgCGGACTCCACGGGTTCTCCCTcctcgtaacgggcgcggcgagcttcatggggtcccactgctctctagctctcaaacggtggggagatggc	.....(.(((.((((((((.((((((.(((.(((......))).).)).))))))..))))))))))).)(((((((.(........).))))))).....
novel-m0089-5p	novel-m0089	Unigene0024093	746	846	-	101	-38.5	66.34	0.57	CGGACTCCACGGGTTCTCCCT	21	5p	ccaccccgtgCGGACTCCACGGGTTCTCCCTcctcgtaacgggcgcggcgagcttcatggggtcccactgctctctagctctcaaacggtggggagatggc	.....(.(((.((((((((.((((((.(((.(((......))).).)).))))))..))))))))))).)(((((((.(........).))))))).....
novel-m0090-5p	novel-m0090	Unigene0025238	1073	1208	+	136	-25.9	38.97	0.49	TTGGGAGGGGTTGGGTGGTG	20	5p	gtttgtaaatTTGGGAGGGGTTGGGTGGTGattacggttctagatttagtgttgtagttttgtttctttgtttgatcatctccattttcatgtcctttgcatcgtccgactcagatatctcaaattgttctgagct	...(((((....((((((((.((((.(((((((((((..(((.(........).)))..))))..........))))))))))).))))...)))))))))........((((((.............))))))..
novel-m0091-3p	novel-m0091	Unigene0026125	1288	1498	-	211	-44.8	44.08	0.48	TAATTGCACACGGATTGGATC	21	3p	ttgtaatcagtgatcacatcatccgccaggtgttcgacaaaataattgagatcaataccacctacagaagcagtggcagacgcatccgtagaagaaactgcctcaaatacaagaatggaatggtgtgacacaagcgcccgaccactctcgctgcaaattatcggatgcttagcaaacttaTAATTGCACACGGATTGGATCgtatttacca	.........(((.((((((((((((..((((((((((........)))))........)))))...((.(((((..(..(((....)))....)..))))).))...........))).)))))))))))).......((((((.((.((.(((((.((((.((.(((...)))..)).)))))))))..)))).))).))).........
novel-m0092-3p	novel-m0092	Unigene0026998	237	504	-	268	-85.3	39.55	0.8	TCGAAGGACAAAATGGACAAT	21	3p	gatttaggatattgtccattttatccttcttatacgaaaacattttaaataaattcaaatccggtaagtgagtcggtgagtgatctaatttgctattctttatgaaaaaatagtctcacttggataaattttggtgagctggtcagtgatctggcgagccggtcagtgagtcaatctatctcgcagtggaagagtcagtgatcgtgcaagccgattcgaagggttcggtgagccgatTCGAAGGACAAAATGGACAATatagtaaaac	..((((..((((((((((((((.((((((..((.((........(((...(((((...(((((...((((((.((((((((......))))))).(((.....)))......).))))))))))).)))))...)))(((.(((((....))))).)))((((((.(((.((..(((((......))))).)).))).)))))).((..(((((.((....)).)))))..))))))..)))))).))))))))))))))..))))..
novel-m0093-3p	novel-m0093	Unigene0027454	103	321	+	219	-84.3	39.73	0.97	CTACCCAGTTGATGCCCATAGG	22	3p	gttcaagtcctatgggcgtcaaataggtagtcagtccatggaaataatttaccagattcaaatattaaggctaaccctagattgatgggatacatggcttacatgatgatgatttggctttggtatttattactatattcggcaaattgtttcccatatgttgaCTACCCAGTTGATGCCCATAGGacttcccgcaacctttgtggttgacaatgagca	((((((((((((((((((((((...(((((((((..((((((((((((((.((.(((..((((((((((((((((((.........)))...((((.....))))........)))))))))))))))........))).)).)))))))))))...))))))))))))...))))))))))))))))).....(((((.....)))))....))))).
novel-m0093-5p	novel-m0093	Unigene0027454	103	321	+	219	-84.3	39.73	0.97	TATGGGCGTCAAATAGGTAGTC	22	5p	gttcaagtccTATGGGCGTCAAATAGGTAGTCagtccatggaaataatttaccagattcaaatattaaggctaaccctagattgatgggatacatggcttacatgatgatgatttggctttggtatttattactatattcggcaaattgtttcccatatgttgactacccagttgatgcccataggacttcccgcaacctttgtggttgacaatgagca	((((((((((((((((((((((...(((((((((..((((((((((((((.((.(((..((((((((((((((((((.........)))...((((.....))))........)))))))))))))))........))).)).)))))))))))...))))))))))))...))))))))))))))))).....(((((.....)))))....))))).
novel-m0094-3p	novel-m0094	Unigene0028199	227	492	-	266	-93.4	54.89	0.64	CACTGTAGATATTTCGCCGATA	22	3p	aggctgaaggcggcggagatatattgcgtggcccgtcggaggccgttggattcggacatatgtggggatttgaggatgagattccttgctacgatgcgctgcactttgggatccgaatcgatgataggaatgaagaggagccggttgtttttgggggcctctttgattacccggatgacgggtctgggccgttggatttttccgacttctcgtggcggcaggagtcgctcccggCACTGTAGATATTTCGCCGATActctcggttt	.((((((.(((((((.((((((.(((((((((((....).)))(((((.((((((((....(((.((....(((((......)))))((......)).)).))).....).)))))))))))).......((((((((..((.(.......).))..))))))))...(((((.....)))))(((((..((((((....)))))).......((((((....)))))))))))))).)))))))))))))))...)).)))))).
novel-m0095-5p	novel-m0095	Unigene0028800	1145	1345	-	201	-65.6	56.22	0.58	CGATGTTGAGGATGTGCGCC	20	5p	ggacggcggtCGATGTTGAGGATGTGCGCCgggaggttgcaatcatgaagcacttgcccaaggactccagcattgtgagctttcgtgaagcttgcgaggatgagaatgcagtgcatttggtgatggagctctgtgaaggaggggagttgtttgatcggatcgttgcacgtgggcattactcagagcgggcggcagctgcag	...((((.((((.((((((((((((.(((.(((((((.((.........)))))).))).....(((...(.(((((((((((...))))))))))))...)))..(((((((.(((((((.(.(.((((((.(......).)))))).).).)))))))))))))).))).))))).))))..)))..)))).))))...
novel-m0096-5p	novel-m0096	Unigene0028800	1322	1413	-	92	-43.8	55.43	0.86	ATCGACCGCAGCACGCGTGAGC	22	5p	ctacctctgcATCGACCGCAGCACGCGTGAGCttcttgcttgcaagaccatcttaaaaaggaagctgcggacggcggtcgatgttgaggatg	...((((.(((((((((((.(..(((...((((((((......((((...))))....)))))))))))..).))))))))))).))))...
novel-m0097-3p	novel-m0097	Unigene0028889	363	673	-	311	-91.5	31.83	0.92	TGTCTCTTTAGTGTGTTTCGC	21	3p	tgagttttcagcgagacacactaacgagacataccacaaaatggattgagggtctcacaaaattaggtttatttgataggttacatggatatgaagtatataatgtttcactatcgagcttggcccttaatttttgatgaatatagattattcatttttaaaagattaaagtccagggatgagattatcaaatggaggtcagatgtcatacaaaaattatttatatgattcgctttataatggattcaataatgtggtataaaaaattcattaaaaggcaTGTCTCTTTAGTGTGTTTCGCtgagatcgtc	...(.(((((((((((((((((((.(((((((.(((.....)))((((((((((..........((((....((((((((..((((..(((((...))))).))))..).)))))))))))))))))))))....((((((((.....)))))))).......((((....((((..((((....))))...)))))))).((.((((((.(((.....))).))))))))(((((.(((((((((..................))))))))).)))))))))))).))))))))))))))))))).)...
novel-m0098-5p	novel-m0098	Unigene0029346	41	105	+	65	-18	30.77	0.9	TTTTTCAACTGAAATTTGGTC	21	5p	taggatttgaTTTTTCAACTGAAATTTGGTCaagatatcaagtttgaaatgaggattcaatccca	..(((((.((.((((((..(.(((((((((......))))))))).)..)))))).)))))))..
novel-m0099-3p	novel-m0099	Unigene0030297	77	205	-	129	-60.1	42.64	1.09	TTACTCTTCTTTCCTTGCATC	21	3p	gggtaaaatctctgtttggatgcacgggagggaggttagtttctctggtaacagccactttttaaccaaaatagctgttgctaagaaaTTACTCTTCTTTCCTTGCATCcaaacggagccttggaactt	.........(((((((((((((((.((((((((((.((((((((.((((((((((....((((....))))..)))))))))))))))))).)))))))))).)))))))))))))))...........
novel-m0099-5p	novel-m0099	Unigene0030297	77	205	-	129	-60.1	42.64	1.09	TGCACGGGAGGGAGGTTAGTT	21	5p	gggtaaaatctctgtttggaTGCACGGGAGGGAGGTTAGTTtctctggtaacagccactttttaaccaaaatagctgttgctaagaaattactcttctttccttgcatccaaacggagccttggaactt	.........(((((((((((((((.((((((((((.((((((((.((((((((((....((((....))))..)))))))))))))))))).)))))))))).)))))))))))))))...........
novel-m0100-3p	novel-m0100	Unigene0030338	420	632	-	213	-62.2	48.83	0.6	AGGAGGAATTTGGGATCAGTG	21	3p	gcttccggtgccgcaacgctttcgggtttcctgtgctgccaaaaaggagacagtagataaggtgtgcgaaattgtgaggaaacagttggcactgccagctgactctgctgtcactggagaatcaaagttcactcagcttggtgctgattcactagatacggttgaaattgtgatgggacttgAGGAGGAATTTGGGATCAGTGtggaagaaga	.((((((((..((((.(((((((..(((((((............)))))))....))..)))))))))..)))).))))...((((((((...))))))))..(((.(((.((((((....(((((.(((.(((..(..(((.((...((((.................)))).)).))).)..)))))))))))..))))))))).)))...
novel-m0101-5p	novel-m0101	Unigene0030428	123	201	-	79	-48.2	46.84	1.3	TGCGTATCGGCCGAGATATCT	21	5p	actgatattgTGCGTATCGGCCGAGATATCTcggatttttaagggctgaggtatctcaaccgatacgcatagtatcggc	.(((((((((((((((((((..((((((((((((...........))))))))))))..))))))))))))))))))).
novel-m0102-3p	novel-m0102	Unigene0030713	106	183	-	78	-24.1	48.72	0.63	TGCAAACTTTGGATTGTGGGGCC	23	3p	tgttcacccgccgcaaacgagtttgcaactttgcatgaagtttggTGCAAACTTTGGATTGTGGGGCCcaaagtggat	.((((((((.((((((.(((((((((((((((....)))))....))))))).)))..))))))))......))))))
novel-m0103-3p	novel-m0103	Unigene0031053	421	550	+	130	-53.4	45.38	0.91	TTGAGCCCCGCCAATATCGCGA	22	3p	acgctttggaagagaaaaggcgatgtttgtcggggttcaatctgaaggccatctttacatgaacaagaaacagtaaaatggcgtcagaTTGAGCCCCGCCAATATCGCGAtaaatcgccggaatctaaga	....(((((..((......((((((((.(.(((((((((((((((..(((((.(((((.((.........)))))))))))).)))))))))))))))).))))))))......)).)))))........
novel-m0103-5p	novel-m0103	Unigene0031053	421	550	+	130	-53.4	45.38	0.91	CGATGTTTGTCGGGGTTCAATC	22	5p	acgctttggaagagaaaaggCGATGTTTGTCGGGGTTCAATCtgaaggccatctttacatgaacaagaaacagtaaaatggcgtcagattgagccccgccaatatcgcgataaatcgccggaatctaaga	....(((((..((......((((((((.(.(((((((((((((((..(((((.(((((.((.........)))))))))))).)))))))))))))))).))))))))......)).)))))........
novel-m0104-3p	novel-m0104	Unigene0031516	45	132	+	88	-28.9	60.23	0.55	ATGGACCGGGTGTTGTGGGC	20	3p	gccaggccatgggcatttttggcgtgctcgtctgcagttgagtacctttagctacgcaATGGACCGGGTGTTGTGGGCacggggctgg	.((((.((.....((....)).((((((((.(.(((.(((.((.((.((.((...)))).))))))).))).))))))))))).))))
novel-m0105-3p	novel-m0105	Unigene0032676	304	433	-	130	-43.8	36.92	0.91	CTTGACGAGCGGTATACCGGTGG	23	3p	ctattttacttctaccgatatatagcttatcaagtaccgattgcatcgataacacgccactctgcttatatatattatgtatattggtattccgataCTTGACGAGCGGTATACCGGTGGaggtaaaata	.((((((((((((((((.(((((.((((.(((((((((((((((((.((((....((......)).......))))))))).))))))........)))))).)))).))))).))))))))))))))))
novel-m0106-5p	novel-m0106	Unigene0032686	400	526	+	127	-51.5	32.28	1.26	TGTTGGGATATCTAGAATAGA	21	5p	aggtagtagcTGTTGGGATATCTAGAATAGAttattattggatgtgatgagttttgaaaatctgttcataattttgttatcacaatctaatcataacctattctatatatcccaacagcggcagcaa	..((.((.(((((((((((((.((((((((.((((.(((((((((((((((((.((((......)))).)))....))))))).))))))).)))).)))))))).))))))))))))).)).))..
novel-m0107-5p	novel-m0107	Unigene0034746	94	165	+	72	-26.8	58.33	0.64	TAGCTCAACTGGTTGTCTCCT	21	5p	cacatgggtcTAGCTCAACTGGTTGTCTCCTgcctcaggaagcggaaggttgtgggttcgagtgcccatggc	..((((((((((((((((((..((((.(((((...))))).))))..)))..))))))..)).)))))))..
novel-m0108-5p	novel-m0108	Unigene0034747	94	165	+	72	-26.8	58.33	0.64	TAGCTCAACTGGTTGTCTCCT	21	5p	cacatgggtcTAGCTCAACTGGTTGTCTCCTgcctcaggaagcggaaggttgtgggttcgagtgcccatggc	..((((((((((((((((((..((((.(((((...))))).))))..)))..))))))..)).)))))))..
novel-m0109-3p	novel-m0109	Unigene0035124	109	433	+	325	-53	31.08	0.52	ATTTTCTATTGGTGGCTGAAG	21	3p	ttgatctttggacaccataggaaagttactaaagtttttatttttttgtgatgcagtaagaacacttgttttttgtatctttccagttagacggtttgttttgtatcccccctcttcctctcaatacacgcacaaaggaatgcgaaaaagtttcctagccattagtcaccatataataaattgaaacctgcttagtcacttcatacttttttattttgttagagcagtaaaaatttgatcatttatgttgagattttttgttttgctattttttttttctaatccttttttattttgattATTTTCTATTGGTGGCTGAAGgtgg	.(.((((((((.(((((..(((((((...((((((..............((((((..((((((....))))))))))))..............((.(((.(((..................))).))).))..((((((.((.(((((((.....((((((..((((.(.((((((((((((.....((((((...((..................))...))))))....)))))).....)))))).).))))...))....))))....))))))))).))))))...))))))...)))))))..))))).)))))))).)
novel-m0110-5p	novel-m0110	Unigene0037674	4	99	-	96	-24.3	36.46	0.69	TGATACCACTTGTTAGAACTG	21	5p	aatttggcttTGATACCACTTGTTAGAACTGgactagtcttttgggatggatacccggttctaacaacgtatatccataaaaaaattagccttttg	.....((((..((((..(((((((((((((((....((((........))))..))))))))))))).)).))))............)))).....
novel-m0111-5p	novel-m0111	Unigene0039525	324	548	+	225	-51.8	33.33	0.69	TGAGAATGAGAGAAAATAGAA	21	5p	taggatgtggTGAGAATGAGAGAAAATAGAAagagaggaagaaaagtgtcggatgtagtgaaaaggagaaaaaagagaagaagagtgtcgggagagataatgttttttataaatctatctctgcaaatccttcatgatataaacttgcgatttctcaagctatgaatattgaataggtcagaaatgacatgaaaataatttgtccttctcattcttatctcctaa	(((((...((((((((((((((...(((((....((((((...((((.....((((.((((..((((......(((((...(((.......(((((((...))))))).....))).))))).....)))))))).))))..))))....))))))...((((.........))))((((....))))..........)))))..))))))))))))))))))).
novel-m0112-5p	novel-m0112	Unigene0039599	105	178	+	74	-24.5	52.7	0.63	TGGTCCGGTTCTGATAACACT	21	5p	ccggcggtcaTGGTCCGGTTCTGATAACACTgatatccacagctttgggagatcgccggcattatggctgtata	...(((((((((((((((((((..(((..(((.......)))..)))..)))..))))).)))))))))))...
novel-m0113-3p	novel-m0113	Unigene0039670	1192	1326	-	135	-62.4	34.81	1.33	TCAAGTGGCTATAAATTGAAT	21	3p	attgaacctcaaatttcaatttttactcacttgatcttagtggtcaaagtcattggacgtccttaaccaaggatgcccgatgattttgactttgaccactaagaTCAAGTGGCTATAAATTGAATtttaactcaa	.((((.....(((.((((((((.((.((((((((((((((((((((((((((((((.(((((((....))))))).))))......)))))))))))))))))))))))))).)).)))))))).)))...))))
novel-m0114-5p	novel-m0114	Unigene0039956	209	405	+	197	-31.2	37.06	0.43	CTCTAAGAGGCCCTGGACACC	21	5p	taattaggttCTCTAAGAGGCCCTGGACACCttggtcataaaaaaaaatgcgatacaagtatgggtcacatgggcaattgataactacataagatttttagatatataaaggagggaaagtaaataaatagagataaggcaatgatggaaagggaaataaaggaggtgttgtgggactttttgttggggcatgagtg	...(((.(((((.((((((((((..((((((((.((((.........(((.(((.((....)).))).))).......))))..((((((...(((((((..(((..................)))..)))))))......))).)))..............))))))))..))).)))))))..))))).)))...
novel-m0115-5p	novel-m0115	Unigene0040729	241	605	-	365	-114	42.47	0.74	ATATGTGGACTTGGATTGGGA	21	5p	ggcatcttccATATGTGGACTTGGATTGGGAaaaccttgatccgtagttggatcttttggggtcgtttggccgtgggtaatttcaccgaaatgcatgaaattgtaattgtaaactgtgcatatcatcttgtgtcccacctagacccaccttgtgccaaaacaaagtgctctccaaaccccatttctggagtagctttcaagtgttgagacttgaaagtgattctaattgtccgatttgaaaccacgagttttgaccctcaaatggttgttgatcctggggtcttaaaagccattgcttgagtcattccaaccaaattgatttttccaatccacatccacatatggaaaagaccacatggaagctt	(((.(((((((((((((((..(((((((((((((....((((((....))))))...((((((.((((((..(((((..((......((.((((((...................)))))).)).....))..))))))))))).(((.((((......)))).)))........))))))....((((((.((((((((((......)))))))))).)))))).......((((...(((((.(((........)))...)))))...)))).((((((.....((((....)))).....))))))..........)))))))))))))..))))))))))))...........))).))).
novel-m0116-3p	novel-m0116	Unigene0042615	112	212	-	101	-27.4	36.63	0.74	TGTGCTTCATCGGTGTAAACCAG	23	3p	cattctattactggtgtactctagatgaagcattctgctttattgttgttgcatgttttagatgctaaTGTGCTTCATCGGTGTAAACCAGaaacatcctt	..........(((((.(((.((.((((((((((...((((((................)))).))....)))))))))))).))).)))))..........
novel-m0117-3p	novel-m0117	Unigene0043190	3	331	+	329	-71.6	41.34	0.53	GCTCGATGATGATTGATTTGCT	22	3p	agcgaagaaaggtgaatctatcacgcgccaggcggcgcactttagcagcgacctgaaagtcactctccacctctcttactcctccccttcctcacagccgtctgatggttgagatctaaggcttcctctttttcttttttatttttaaatttttttttggtcttctatattatttaattcaacatattttttctactcagattagtagattactgcttcattagccagatctggggtttgtctcctgcagatctatttgtacttacatggctggtgaatcctagccgtctgtttcgaGCTCGATGATGATTGATTTGCTttaaccacac	........(((((((((((((((((.((((((((((.......(((((.((((.(((((..........................((((..((.(((((((...))))))).))...))))................((((....))))...))))).)))).............................((((((......))))))...)))))((((((((((((((((.((........)).))))))....(((....)))))))))))))......))))))))......)).)).)))))...))))))))))........
novel-m0118-3p	novel-m0118	Unigene0043353	506	775	-	270	-51.3	38.15	0.5	TGAATCAAAAGAGTTCTGCACC	22	3p	cttatgatatgttggggatctcttatgaaaatcatccacgcctgaaacgtatcttgatgcccgaaagttggataggatggcctctacgtaaggattatattgcccccaatttctatgaaatacaagatgcttattgaatgataagaaactaatctttccttctacgactcctaaaggggcttcgttaatattccccaatttggaagatatctatttcgtatgagtaaaaccaagaggaTGAATCAAAAGAGTTCTGCACCaggaactttg	.........((.((.(((.(((((.(((...((((((...........((((((((((......(((((((....((((...(((......)))...))))....))))))).......)).)))))))).....(((.(((.((...)).))).)))(((.(((((((.(((((((((.............))))..))))).)).........))))).)))...........)))))).))).))))).))).)).)).........
novel-m0119-3p	novel-m0119	Unigene0044903	273	380	-	108	-40.1	60.19	0.62	GCTGGACATGGACCCATCACT	21	3p	cttgccggtggagccttcgacggtggatccatgaacccagcagtctcctttggacctgctctggtcaGCTGGACATGGACCCATCACTgggtttactgggctggccct	....((((((((.((......(((((.((((((...(((((...........((((......)))).))))).)))))).)))))...)).)))))))).........
novel-m0119-5p	novel-m0119	Unigene0044903	273	380	-	108	-40.1	60.19	0.62	CGGTGGATCCATGAACCCAGCA	22	5p	cttgccggtggagccttcgaCGGTGGATCCATGAACCCAGCAgtctcctttggacctgctctggtcagctggacatggacccatcactgggtttactgggctggccct	....((((((((.((......(((((.((((((...(((((...........((((......)))).))))).)))))).)))))...)).)))))))).........
novel-m0120-3p	novel-m0120	Unigene0045118	712	830	+	119	-41.6	38.66	0.9	TTTTCCCAAGAGAGTGCTTCC	21	3p	tgcatggaaaggacagtgctttcctggaaaattgccatttttgacgaaaagaagttagaccgattttattcttaactaagaaatggttTTTTCCCAAGAGAGTGCTTCCctttgcatgc	.(((((.(((((..(((((((((.(((.(((..(((((((((......(((((...............))))).....)))))))))..))).))).)))))))))..))))).)))))
novel-m0121-3p	novel-m0121	Unigene0045556	363	512	+	150	-57.1	46	0.83	TTCTCCATCTTGCACGACTC	20	3p	gaagatgaggtgagatgggcatgatggagaagatgagcacatgaaagcctacctttctttttgctttctctaagagagagagagacagaggtattaaagaaggtcatgcacgtgccctgcTTCTCCATCTTGCACGACTCtccttgctat	..((.(((((.(((.(.((((.((((((((((....((((.((...((((((((((.(((((.(((((((...)))))))))))).))))))........))))....)).))))....)))))))))).))).).)))).)))))))..
novel-m0122-3p	novel-m0122	Unigene0045882	235	447	+	213	-64.4	33.33	0.91	TTTCAAACTCACCCATCCTCA	21	3p	gcgggttggatgggtttgaaagattttgtgtgtttataatgcctaaaaaatgaacttgaaattaactctagccatggttttgaaggaccaaaaaatcaacgataaataaaggagcaattttatcaagtttgatcacatggctagtgtcatttaatttagccatttttttcataagcattagatacacacatcTTTCAAACTCACCCATCCTCA	..(((.(((.(((((((((((((...(((((((...((((((..((((((((..((..((((((((.(((((((((.(((((......))))).((((((((((((............))))))..).)))))..))))))))).))....)))))))).))))))))......))))))...)))))))))))))))))))).))).)))..
novel-m0122-5p	novel-m0122	Unigene0045882	235	447	+	213	-64.4	33.33	0.91	GGGTTGGATGGGTTTGAAAGA	21	5p	gcGGGTTGGATGGGTTTGAAAGAttttgtgtgtttataatgcctaaaaaatgaacttgaaattaactctagccatggttttgaaggaccaaaaaatcaacgataaataaaggagcaattttatcaagtttgatcacatggctagtgtcatttaatttagccatttttttcataagcattagatacacacatctttcaaactcacccatcctca	..(((.(((.(((((((((((((...(((((((...((((((..((((((((..((..((((((((.(((((((((.(((((......))))).((((((((((((............))))))..).)))))..))))))))).))....)))))))).))))))))......))))))...)))))))))))))))))))).))).)))..
novel-m0123-5p	novel-m0123	Unigene0046154	608	685	-	78	-34.7	64.1	0.69	CGGAGAACCCACACACCTGAG	21	5p	agcggcatgcCGGAGAACCCACACACCTGAGgcggagcaaccggtgtgggttgaaggtggtgggtctgcggttccaca	.(.((...((((.(((.(((((.(((((..(((...(((.....)))..)))..))))))))))))).)))).)).).
novel-m0124-5p	novel-m0124	Unigene0046187	12	297	-	286	-103.5	50.7	0.71	TTGGATTTATGGCTCAAAGCC	21	5p	ggcactactgTTGGATTTATGGCTCAAAGCCtgtttgggactggattattggctgggcacaggcctaggcccagtgagcctagtctgttgtaagctgcagtatttatgtgtctctttctctagggtttctttggacagggccagaggaggccatcccatagggacccaagaggaacctctaatgctgagagctgtgaagagtgagagatgtagtgaggaagatagagagaggcatgagggaagatagtgagagatttgggtcaggggttcctgagtggcattgcca	(((((((((...((((((.(((((((((..((.((..(((((((.(((((((((((((....))))))..)))))))..))))))).......(((((....(((((((.(((((((((((.((((((((.(((....((((......))))...))).)))))))).)))))..((((...(((.....(((......))).......)))..))))......)))))).)))))))....).)))))).)).))))))))).))))))...)))))...)))).
novel-m0125-5p	novel-m0125	Unigene0046213	2233	2566	-	334	-102.3	47.9	0.64	CTCCAGAATCTTTGAAGAGCT	21	5p	tatgaaatgaCTCCAGAATCTTTGAAGAGCTtcacaggtgagcggatggggaatgagtatctgatcaatctcattgattctcctgggcacgttgacttctcctcagaggttacagctgccctccgtatcaccgatggtgcactggttgtggtagattgtgtggaaggtgtatgtgtccaaactgaaacagtgctgcgacaagcccttggagaaaggatcaggcctgtcctaactgtcaacaagatggatcgctgtttccttgagcttcaggttgagggcgaggaagcttaccagacattccaacgagtcattgaaaatgccaatgttatcatgg	.....((((((((..((((.((((..(((((((...((((((((((.(((((((.(((....((....))..))).))))))).(((((.((((((((((....))))))..)))))))))))))).)))))(((((.((.((((((((.(((((((((......(((............)))...))))).)))).)))...((((.....))))))))))))))))....(((((.....))))).(((((.((..(((((...)))))..)).))))).)))))))..)))).))))....)))))))).......(((.((....)))))
novel-m0126-3p	novel-m0126	Unigene0046431	533	667	-	135	-56.2	40.74	1.02	TTCAAGTTCATGAAAGCTGTG	21	3p	aatcccttcatgctcttccacagctttcttgaacttggatagtgtccacatgattgaattggaggttgtctattcatcatcttccactctttatTTCAAGTTCATGAAAGCTGTGggaaaccatgttgggattgg	((((((..((((...(((((((((((((.((((((((((.((((.....(((((.((((.(((.....))))))))))))....))))......)))))))))).)))))))))))))...))))..))))))..
novel-m0126-5p	novel-m0126	Unigene0046431	533	667	-	135	-56.2	40.74	1.02	CAGCTTTCTTGAACTTGGATA	21	5p	aatcccttcatgctcttccaCAGCTTTCTTGAACTTGGATAgtgtccacatgattgaattggaggttgtctattcatcatcttccactctttatttcaagttcatgaaagctgtgggaaaccatgttgggattgg	((((((..((((...(((((((((((((.((((((((((.((((.....(((((.((((.(((.....))))))))))))....))))......)))))))))).)))))))))))))...))))..))))))..
novel-m0127-3p	novel-m0127	Unigene0046432	363	497	-	135	-56.2	40.74	1.02	TTCAAGTTCATGAAAGCTGTG	21	3p	aatcccttcatgctcttccacagctttcttgaacttggatagtgtccacatgattgaattggaggttgtctattcatcatcttccactctttatTTCAAGTTCATGAAAGCTGTGggaaaccatgttgggattgg	((((((..((((...(((((((((((((.((((((((((.((((.....(((((.((((.(((.....))))))))))))....))))......)))))))))).)))))))))))))...))))..))))))..
novel-m0127-5p	novel-m0127	Unigene0046432	363	497	-	135	-56.2	40.74	1.02	CAGCTTTCTTGAACTTGGATA	21	5p	aatcccttcatgctcttccaCAGCTTTCTTGAACTTGGATAgtgtccacatgattgaattggaggttgtctattcatcatcttccactctttatttcaagttcatgaaagctgtgggaaaccatgttgggattgg	((((((..((((...(((((((((((((.((((((((((.((((.....(((((.((((.(((.....))))))))))))....))))......)))))))))).)))))))))))))...))))..))))))..
novel-m0128-3p	novel-m0128	Unigene0046815	89	244	+	156	-48.4	44.87	0.69	AAGAGGAGGAAAAGCAGGTGA	21	3p	gttttccgaccctgttttttctcctcttatatctttggatagaatggaaaggggaaggaaggaaaagaattgtggtgtgatggagtttctccaagggagagaaagctactgcgaggaagaagaggAAGAGGAGGAAAAGCAGGTGAtgttgggaga	.(((((((((((((((((((((((((((...(((((...(.............................((((((((.(......(((((((...)))))))...))))))))))...)))))..))))))))))))))))))....)))))))))
novel-m0129-5p	novel-m0129	Unigene0047686	536	614	+	79	-24.1	45.57	0.67	GAGGATAGACAGGATACTGGA	21	5p	tggtcgaaaaGAGGATAGACAGGATACTGGAataaaaactctgcagacgacagtatcttgcctacctcgacttgttccc	.((.(((...((((.(((.((((((((((.....................)))))))))).)))))))...)))..)).
novel-m0130-5p	novel-m0130	Unigene0047869	358	597	+	240	-93.5	50.42	0.77	CACCACTCCATCCTCCTCAATCA	23	5p	tcccacctttCACCACTCCATCCTCCTCAATCAcctttcccaccatgaattgtcacacaattccttctaatcccattaaattgggtccaactcatgcctctgccacctgaccagcccaacagtctgggcccattgttagacagctagatgatagctgagtgtcatgttccatgtgccaattcaggaaggggaggggttcggataggtgattgagccaggttgatttggtgcgaggtggca	..(((((((.(((((...((.(((.(((((((((((.(((.(((..(((((((...)))))))........((((......))))...........(((((.(..(((((...(((((......)))))...........((((((.....)))))).(((.((((...)))))))....)))))..).))))))))..))).)))))))))))..))).))...))))).)))))))..
novel-m0131-3p	novel-m0131	Unigene0047972	385	465	-	81	-40.2	29.63	1.68	TTTGTGAATTCTACGTTAATCAG	23	3p	aaatagatatgctgatcaacgtagaattcgcacaaatattggttgattTTTGTGAATTCTACGTTAATCAGtgtatctatt	.(((((((((((((((.(((((((((((((((.((((........)))).))))))))))))))).)))))))))))))))
novel-m0131-5p	novel-m0131	Unigene0047972	385	465	-	81	-40.2	29.63	1.68	GATCAACGTAGAATTCGCACAAA	23	5p	aaatagatatgctGATCAACGTAGAATTCGCACAAAtattggttgatttttgtgaattctacgttaatcagtgtatctatt	.(((((((((((((((.(((((((((((((((.((((........)))).))))))))))))))).)))))))))))))))
novel-m0132-3p	novel-m0132	Unigene0048654	759	1113	+	355	-89.7	41.13	0.61	GATCCGTCACTGAAAGCATTGA	22	3p	tgttgctgcatcagagttctatgatggcaaggataagacttatgatctaaattttaaagaggagaacaatgatgggtcacagaagatatcaggagatagcttgaagaatgtctacaagtcctttgtaactgaatatccaattgtttccatagaggatccatttgatcaggatgattgggaacactatgccaagatgaccgccgagattggaaaacaagtacagattgttggcgatgatctgcttgtcaccaaccctaagcgtgttgcgaaagcaatcaaggaaaagtcctgcaatgcccttctgttgaaggttaatcaaattgGATCCGTCACTGAAAGCATTGAggctgtgaaa	........(((((..(((((..(((.(.(((.......))).).)))...............)))))..)))))..((((((..((((((((...((((((((.(((...))).)))))....)))..))).)))))((((.((((.((..(((((((((((((((((((((..((((.(......).))))......(((..((.((((...(((((..(((((((((...))))))))))))))..))))..))..))).(((((....))))).........))))))......(((((....)))))...)))))).))))))).))..)).))))))))...))))))..
novel-m0133-5p	novel-m0133	Unigene0049198	1747	1837	-	91	-44.3	62.64	0.78	CACCCAGATCTCGCACAGCTCC	22	5p	ggcaacgccaCACCCAGATCTCGCACAGCTCCagcggcttctccctaggttgctgaagctactgcgcagccctgggttcaaggcgaagcca	(((..((((..((((((..((((((.((((.(((((((((......))))))))).))))..)))).))..))))))....))))..))).
novel-m0134-5p	novel-m0134	Unigene0049330	212	430	+	219	-66.6	31.51	0.97	TGATCTTGGCTATGGAGAGAA	21	5p	caatctttgaTGATCTTGGCTATGGAGAGAAaaatatgtaagaaaggggaaaataataaaattgtaagtgtgtaaaaggaaaaaaataggaattgagaggataaaacagagagccatttttgaacattttccctttacactttcaattccatcaattttcctttttttgcccattttctctccacggctaagatcataaaaaaatgaatccaaaggcaa	...((((((((((((((((((.(((((((((((....(((((((((((((((.......(((((.(((.(((((((.((((((.....((((.((...................)).)))).....)))))).))))))))))))))).......)))))))))))))))...))))))))))).)))))))))))).............))))))...
novel-m0135-5p	novel-m0135	Unigene0049814	63	149	+	87	-35.4	42.53	0.96	ATACATATCGTATCGGCCGATA	22	5p	aaattggccgATACATATCGTATCGGCCGATAtgaaacggttttggagagtcgaatattggccgatatgaaacggttcagccaatat	..((((((.((..(...((((((((((((((((...((...........))...))))))))))))))))...)..)).))))))..
novel-m0136-5p	novel-m0136	Unigene0050004	919	1092	+	174	-64.9	35.63	1.05	CACCGGTACTCTCTTTGACAG	21	5p	tttatttgagCACCGGTACTCTCTTTGACAGagaaccggatgatgcaatttttgtgtgcttttttttcatttcgccctttatttttaaagataaaatgagggtaaaatgggaaaaaatcccatgatgctatcaatggttctccatggaagagaaagtataggtgcacaaatcaa	...(((((.(((((.(((((((((((.(..((((((((..(((((((....(((((.(.(((((((((((((.((((((.(((((.......))))))))))).))))))))))))).).)))))))).)))).))))))))..).)))))))..)))).))))).)))))...
novel-m0137-3p	novel-m0137	Unigene0050053	476	692	-	217	-76	38.25	0.92	CTCACACTTTACCTCTTTGATC	22	3p	tggtttcctgtgatcagaagggtgaagtgtgaagctcaatgctgaatactatcaaatgcccatcaaatattttgcaggatacttggatcacaaattttctgcttgaaaaaattatgacatttctatgcagaaagtttgctatcaagttgcaaattggttggttggttgcatcttcacactcgaccCTCACACTTTACCTCTTTGATCaatggaaacc	.(((((((..((((((((.((((((((((((((((.....)))..............(((.(((((....((((((....((((((....((((((((((((..((((...........))))...))))))))))))...))))))))))))))))).))).(((((............))))).))))))))))))).))))))))..)))))))
novel-m0138-5p	novel-m0138	Unigene0050117	1	151	+	151	-46.7	36.42	0.85	TCCCTTTCTGTCATCATCTGA	21	5p	ctgtgaaTCCCTTTCTGTCATCATCTGAgtcttctaggaaattgtctttgattttgggtttctacttctttttgggtattttaaaaaaagaggcaaacttcaaaagaggtgatttttttggaagccaggtgattcagaacagagatccaga	(((.((.((.(((((((..((((((((.(.(((((((((((..(((.((..((((((((((...(((((((((...........))))))))).)))).))))))..)).))))))))))))))))))))))).))))).)).))))))).
novel-m0139-3p	novel-m0139	Unigene0050223	1122	1320	+	199	-37.9	38.19	0.5	ATGAAATTGTGGCGCGTGGCATA	23	3p	gatctagcggtggaccaccaagattggccatataggcaagtgtttgacaatggaccaccaagataaatgctattattcatcatgtttcacttggttgatgtaccatgacaaatcgatttcttaaaagactttctataaatggttatacttgttctgtacttctagtATGAAATTGTGGCGCGTGGCATAaagttggact	..(((((((((((.(((.(((((((.(((.....))).))).))))....))).))))).......(((((((...((((...((((((..((.(.((.((((...(((((...((((..(((..(((...))).)))..))))....)))))..)))).)).).)))))))).))))...)))))))...))))))..
novel-m0140-5p	novel-m0140	Unigene0050223	1396	1473	+	78	-25.7	35.9	0.92	AAGTCGATGAAGTGAGTGATTCA	23	5p	cttctagtatAAGTCGATGAAGTGAGTGATTCAattcatatttttgaatgactcacagtcatcagctcacattaggtg	..((((((...(((.(((((.((((((.((((((.........)))))).))))))..))))).)))...))))))..
novel-m0141-3p	novel-m0141	Unigene0050223	2210	2452	+	243	-88.8	37.45	0.98	TATTGGTGCAGGCCCAAATGGGC	23	3p	attgtagggcccatgtgggctagtgtcaatacgttggaatgggtgggatatatcgttcaccatatgtattgtaagtagcctataagtttttgacttttgtaaagtgatgattttctttatcctatttgacaaggctaagatggttagatgaggataaaacttcatccaacacttacatatgttgtcttttacttgtcctacacattttgttgTATTGGTGCAGGCCCAAATGGGCcctataaa	.(((((((((((((.((((((.(((((((((((.(((((((.((((((((.......((.((((((((..((...((((((..(((((...))))).(((.(((((((((......)))))..)))).))))))))).....(((.(((((((......))))))).))))).)))))))).)).........)))))))).))))))).))))))))))).)))))).))))))))))))).
novel-m0141-5p	novel-m0141	Unigene0050223	2210	2452	+	243	-88.8	37.45	0.98	CCATGTGGGCTAGTGTCAATACG	23	5p	attgtagggcCCATGTGGGCTAGTGTCAATACGttggaatgggtgggatatatcgttcaccatatgtattgtaagtagcctataagtttttgacttttgtaaagtgatgattttctttatcctatttgacaaggctaagatggttagatgaggataaaacttcatccaacacttacatatgttgtcttttacttgtcctacacattttgttgtattggtgcaggcccaaatgggccctataaa	.(((((((((((((.((((((.(((((((((((.(((((((.((((((((.......((.((((((((..((...((((((..(((((...))))).(((.(((((((((......)))))..)))).))))))))).....(((.(((((((......))))))).))))).)))))))).)).........)))))))).))))))).))))))))))).)))))).))))))))))))).
novel-m0142-5p	novel-m0142	Unigene0051956	312	445	+	134	-30.6	36.57	0.62	CAGGGAAAGGAAAGTGAATTTC	22	5p	catttggatgCAGGGAAAGGAAAGTGAATTTCttgaaaaataatggtttctttttgttgaaaaaatggttaccccatttccgtgtttggttattctgtgagaaagcactgtcctttcaatccttcgttttcacc	.....(((((.((((((((((.((((..(((((((...(((((...((((........))))((((((.....))))))(((....))))))))...))))))).)))).)))))))...))).))))).....
novel-m0143-5p	novel-m0143	Unigene0052165	2239	2333	-	95	-31.2	50.53	0.65	AAGAAGGAGAAGAAGAAGAG	20	5p	ccgatccgggAAGAAGGAGAAGAAGAAGAGgcgtcgacggcttcaccatcatctccttgcccatcttcttgctcttcttcttatgcttggaatct	....((((((((((((((((..(((((((((((..((.((.....)).))..).....)))..)))))))..))))))))))...))))))....
novel-m0144-5p	novel-m0144	Unigene0052166	1655	1749	-	95	-31.2	50.53	0.65	AAGAAGGAGAAGAAGAAGAG	20	5p	ccgatccgggAAGAAGGAGAAGAAGAAGAGgcgtcgacggcttcaccatcatctccttgcccatcttcttgctcttcttcttatgcttggaatct	....((((((((((((((((..(((((((((((..((.((.....)).))..).....)))..)))))))..))))))))))...))))))....
novel-m0145-5p	novel-m0145	Unigene0052172	905	1133	+	229	-70.9	54.15	0.57	ACCGGGAATTCTGTAAACGCG	21	5p	gctggtcgagACCGGGAATTCTGTAAACGCGcgagggatattggcgcggctcaatcaccagctctccaacattgggaagcccctccagagggcggctttctacttcaaggaggcgctgcaactgctcctcaattccggtcataaccacccctctgcttcctctgcgtctcctatagatgttgtcttcaagatcagtgcgtacaaggtattctctgagatctctccagtc	(((((..((((((((((((.((....(((((((((((...((((.(.((((........))))).))))...((((((((((((.....))).))))))))).......((((.((.......)).))))......(((....)))..)))))(((.......))).........(((.(((....))).))).))))))....)).)))).))).).)))).))))).
novel-m0146-3p	novel-m0146	Unigene0052193	140	218	-	79	-24.6	46.84	0.66	ATGCTTCTTCAGTTGTTCATC	21	3p	gtcgccttctttcgatccggtctgaggaagaagaagaacccgttcatcATGCTTCTTCAGTTGTTCATCaaagaggtga	.((((((.((((.(((.(((.((((((((((.((.(((....))).)).).))))))))))))...)))))))))))))
novel-m0147-3p	novel-m0147	Unigene0052526	115	191	+	77	-31.5	55.84	0.73	TTTGAGCCAGGGTCGGTGGAC	21	3p	gtgttcttctgtcaagctaggctctgggaaaggctgtacgcaaaggTTTGAGCCAGGGTCGGTGGACaggggtagca	.((((((((((((..(((.((((((((..(((.((........)).)))...))))))))))).)))))))).))))
novel-m0147-5p	novel-m0147	Unigene0052526	115	191	+	77	-31.5	55.84	0.73	CAAGCTAGGCTCTGGGAAAGGC	22	5p	gtgttcttctgtCAAGCTAGGCTCTGGGAAAGGCtgtacgcaaaggtttgagccagggtcggtggacaggggtagca	.((((((((((((..(((.((((((((..(((.((........)).)))...))))))))))).)))))))).))))
novel-m0148-3p	novel-m0148	Unigene0052805	175	293	-	119	-50.7	49.58	0.86	TTTCCGAGAGGGCTTAAACCAC	22	3p	gtaatctctcggaggcttgtggcttgagtcgatcggagaagaagaaacgagtaggagtaatatctaccgttgatttaTTTCCGAGAGGGCTTAAACCACtggattccgggaggccctcc	....(((((((((..((.((((.(((((((..(((((((.(((..((((.(((((.......)))))))))..))).)))))))...))))))).)))).))..)))))))))......
novel-m0148-5p	novel-m0148	Unigene0052805	175	293	-	119	-50.7	49.58	0.86	GGCTTGAGTCGATCGGAGAA	20	5p	gtaatctctcggaggcttgtGGCTTGAGTCGATCGGAGAAgaagaaacgagtaggagtaatatctaccgttgatttatttccgagagggcttaaaccactggattccgggaggccctcc	....(((((((((..((.((((.(((((((..(((((((.(((..((((.(((((.......)))))))))..))).)))))))...))))))).)))).))..)))))))))......
novel-m0149-3p	novel-m0149	Unigene0052903	889	1009	+	121	-46.1	39.67	0.96	TTGGGATTGGGCTTGGGCTTT	21	3p	cttgatgggcttgaactaaaagctctagttcactctcaacccaagtaaattgtatagctcaaattttcagtttatttaggTTGGGATTGGGCTTGGGCTTTtgaagtctttgaggcctgtt	...(((((((((.((((((((((((.((((((.((((((((.((((((((((...............)))))))))).)))))))).)))))).))))))))..)))...).)))))))))
novel-m0149-5p	novel-m0149	Unigene0052903	889	1009	+	121	-46.1	39.67	0.96	AGCTCTAGTTCACTCTCAACC	21	5p	cttgatgggcttgaactaaaAGCTCTAGTTCACTCTCAACCcaagtaaattgtatagctcaaattttcagtttatttaggttgggattgggcttgggcttttgaagtctttgaggcctgtt	...(((((((((.((((((((((((.((((((.((((((((.((((((((((...............)))))))))).)))))))).)))))).))))))))..)))...).)))))))))
novel-m0150-3p	novel-m0150	Unigene0053257	796	991	+	196	-79	61.22	0.66	CACCGGAGAATTCAGAGCTTC	21	3p	ggtggcgccgcctcgtgcaagcatgatgaggcagagggcgaggtactcctcttcggtgggttcccgtgtctcgactcgtgggcgtttcgtccgcggccgtttcgcccacggctccagactttgcagatccatcgtctcgcctaacgaaaaatggcctgcgtgaccCACCGGAGAATTCAGAGCTTCgagagccatt	.(((((.(((((((((.((....)))))))))...)).((((((.((..(((((((((((((.....((((.((.(((((((((...((.(....).))...))))))))).)).))))..(((((..((((....(((.....)))...)))).))))).)))))))))))))....)).))))))...))))).
novel-m0151-3p	novel-m0151	Unigene0053378	465	754	-	290	-112.6	40.34	0.96	TTTCTATCTTCGACATAGCGCG	22	3p	tatctttttcttctttctggcgctgtatcggacgtagaaatatcgtaacaacaaaaaagacgtggttggagaaaaaaataggggtgttggcgacgatggaaaagaaacaggtcaaaaaaacgaaagttcaagaaaaagggtggttttccatcttgcgattcgcagcacctcgttctccatcatctctccggcgatacaccatcacttctatttttttcttctacaatctcttgtttcttgttatgatgTTTCTATCTTCGACATAGCGCGagagagaagggaaacataga	(((.((((((((((((((.(((((((.(((((.((((((((((((((((((.(((.((((.((.((.(((((((((((((((((((.(((.(..((((((...(((..((((......(((....))).........((((((....))))))((((...))))..))))..)))))))))(((........))).).))).))))))))))))))))))).)).)).)))).))).)))))))))))))))))).))))).))))))).)))))))))))))).)))..
novel-m0151-5p	novel-m0151	Unigene0053378	465	754	-	290	-112.6	40.34	0.96	CGCTGTATCGGACGTAGAAATA	22	5p	tatctttttcttctttctggCGCTGTATCGGACGTAGAAATAtcgtaacaacaaaaaagacgtggttggagaaaaaaataggggtgttggcgacgatggaaaagaaacaggtcaaaaaaacgaaagttcaagaaaaagggtggttttccatcttgcgattcgcagcacctcgttctccatcatctctccggcgatacaccatcacttctatttttttcttctacaatctcttgtttcttgttatgatgtttctatcttcgacatagcgcgagagagaagggaaacataga	(((.((((((((((((((.(((((((.(((((.((((((((((((((((((.(((.((((.((.((.(((((((((((((((((((.(((.(..((((((...(((..((((......(((....))).........((((((....))))))((((...))))..))))..)))))))))(((........))).).))).))))))))))))))))))).)).)).)))).))).)))))))))))))))))).))))).))))))).)))))))))))))).)))..
novel-m0152-3p	novel-m0152	Unigene0053594	2003	2122	-	120	-52.3	56.67	0.77	CCCACCGATCCCAACCTCTCC	21	3p	aaaaaggaggcagaagatggagcggtcgggatacggaagggacggcatctacaggtctcttcgtcctccacttcgcttcCCCACCGATCCCAACCTCTCCatggtctccttccttttccg	.(((((((((.(((..((((((.(((.(((((.(((..((((.(((......(((.(.....).))).......)))))))..)))))))).))).))))))..))).)))))))))...
novel-m0152-5p	novel-m0152	Unigene0053594	2003	2122	-	120	-52.3	56.67	0.77	AGCGGTCGGGATACGGAAGGGA	22	5p	aaaaaggaggcagaagatggAGCGGTCGGGATACGGAAGGGAcggcatctacaggtctcttcgtcctccacttcgcttccccaccgatcccaacctctccatggtctccttccttttccg	.(((((((((.(((..((((((.(((.(((((.(((..((((.(((......(((.(.....).))).......)))))))..)))))))).))).))))))..))).)))))))))...
novel-m0153-5p	novel-m0153	Unigene0053838	3504	3630	+	127	-49	44.88	0.86	TGAAAATGCATTTTGGCCTGG	21	5p	tttgtctaggTGAAAATGCATTTTGGCCTGGacctggtgaaattctctcaaataagccccttcgcctccaccgaatgggtgattccggtatttgtctaggtgaaaatgcattttggccttgagaaac	(((.((.((((.((((((((((((.((((((((((((..................((((.((((.......)))).))))....)))).....)))))))).)))))))))))).)))).)).))).
novel-m0154-3p	novel-m0154	Unigene0054818	257	465	+	209	-56.6	50.72	0.53	TCCACAGACTGATGGACAGTC	21	3p	ccatcaagatgacagattcatcagagactttgggtcgacggtacatccgggagatcatcaggttacatggcattccccggtctattgtgtccgacagggatggtcgattcacccgtagagtatggcagagcttgcagtcggctatgggaaccgacgtattaactagcacagcatttcaTCCACAGACTGATGGACAGTCagagaggatg	.((((....((((.(.((((((((...((.(((((..((((((...(((((.((...(((.......)))...)))))))..))))))((((.....)))).((((.....(((((((......(((.....)))......)))))))...))))......................))))).)).))))))))).)))).....))))
novel-m0155-3p	novel-m0155	Unigene0055320	1149	1300	+	152	-66.9	32.89	1.34	AAAGATGTGCACCATGGGAGA	21	3p	cacttctattttctcccatggtgcacttctttaaaagaaattttcaaatttaatcttatttctcaattctgctcccttttcctccatcctaaaaggaagaataagtttgaaaattccttttAAAGATGTGCACCATGGGAGAaaatgagagt	.((((.((((((((((((((((((((.((((((((((.((((((((((((((.((((.................((((((..........)))))))))).)))))))))))))).)))))))))).)))))))))))))))))))).))))
novel-m0156-5p	novel-m0156	Unigene0055511	385	499	-	115	-42.6	63.48	0.58	TTGGACCCATTCTGCCCGAGA	21	5p	cccccagtggTTGGACCCATTCTGCCCGAGAgctttgaggagcagatgatgctggccatggctgtttcgctggcggaggctcggggacggtggagctcacaggaactgggttggc	((((((((..(((((((((((.(.((((((..(((((.(((((((.(.(((.....))).)))))))).....))))).)))))).).))))).).)).)))..))))))..)).
novel-m0157-3p	novel-m0157	Unigene0055768	580	888	+	309	-117.6	54.69	0.7	AAGGGATTGCGCGGGGAGAGCT	22	3p	tctctcgtctgttctcacgccaaatcccttcaatatcagccgcacacgacaacagtcttcgtatgttttcctcacccctctcaagctggtaaagtacagcaccacgctgtcctctccacgtggagggcatttattgggaaagacattgttgtgggctttctttgatagtctgccttcgtttattctttcttgaaaggcgcggatcctctcctgcacagtgcttcccagcttggggccggtcgagccggtcttttccggttcgggggacttgagccggAAGGGATTGCGCGGGGAGAGCTcgtcgagggc	.((((((.(.((((((.(((..(((((((((....((((..(((.((((.........)))).)))..((((((((..(((((((((((..((((((.(((((.(((((((((((......))))))))....((((((((((.((...((.((((...((.....))...)))).))...))))))))))))...))).)).........)))...)))))).)))))))))))..)))((((((((......))))))))))))).))))....)))))))))..)))..))))))..).)))))).
novel-m0158-5p	novel-m0158	Unigene0056020	2477	2720	+	244	-97.2	41.8	0.95	TTTGTGTGGCCCAAATAGACTT	22	5p	agaactttggTTTGTGTGGCCCAAATAGACTTaaatggatcaaattccccactcacacctctaggtgccaccttggcccatatggatgggtaatttcacatttatctaattgtggaaattatttgggttagatcaatgggctttaaaagttaaattgggtatcggtgcaattctgggcataagtgggtgtgagagtgaaattggatccattaggtctactgtgggccccacaaaccaaagtttg	.(((((((((((((((.((((((..(((((((((.((((((.((((.(.(.(((((((((((..((((((((...(((((....(((...(((..((.((((.((((((((..............)))))))).))))))..)))...)))....)))))...))).........))))).)).))))))))).).).)))).)))))))))))))))...)))))).))))))))))))))).
novel-m0159-5p	novel-m0159	Unigene0056020	2466	2730	-	265	-96.3	41.51	0.88	CAAACTTTGGTTTGTGGGGCCC	22	5p	gattttcacgCAAACTTTGGTTTGTGGGGCCCacagtagacctaatggatccaatttcactctcacacccacttatgcccagaattgcaccgatacccaatttaacttttaaagcccattgatctaacccaaataatttccacaattagataaatgtgaaattacccatccatatgggccaaggtggcacctagaggtgtgagtggggaatttgatccatttaagtctatttgggccacacaaaccaaagttctcatgaaagtct	((((((((.(..((((((((((((((.((((((.(((((((..((((((((.((((((.(.((((((((......(((((.((((((..........))))))..........((((((.(((..........(((((((.(((..........))))))))))...)))...))))))....).))))......)))))))).).)))))).))))))))...))))))))))))).))))))))))))))..).)))))))).
novel-m0160-5p	novel-m0160	Unigene0057005	98	231	-	134	-25.9	40.3	0.48	TCGATGTAGATGTCTGGGTCT	21	5p	atcgatgtcaTCGATGTAGATGTCTGGGTCTcacagcggaatcgcctccaagatcaaatgactcgctctcataatatcatcaacaagcttttcaattgatcagatctctaacaacactaggtttgtgtattgta	..(((((.(((.(((.(((.(((..((((((....(((....)))......((((((.(((...(((..................)))...))).))))))))))).)..)))...))).))).))))))))..
novel-m0161-5p	novel-m0161	Unigene0057026	278	385	+	108	-57.1	36.11	1.46	TTTCTAGCCACTTGATCTTAG	21	5p	cgaaatttaaTTTCTAGCCACTTGATCTTAGtggtcaaaatcagtaggtgttcttgaacatttgctgactttgaccactgagatcaagtggttccatattgcatttta	.(((((.((((....((((((((((((((((((((((((.((((((((((((....)))))))))))).))))))))))))))))))))))))....)))).))))).
novel-m0162-3p	novel-m0162	Unigene0057217	695	852	-	158	-70.3	44.94	0.99	TTACCCCCATCCAAACGCAGC	21	3p	ttatcttaaagctgtgtttggatggggggctctccctcaacttttgagaacccttttcaagggagggtttttatattatttggggtaacacctgatcaggagttaccctgggtaacccctccaaaatTTACCCCCATCCAAACGCAGCaatgttacag	..........(((((((((((((((((((((((((((.......((((((...))))))))))))))).......((((((((((((((.(((....))).))))))))))))))...............))))))))))))))))))..........
novel-m0163-5p	novel-m0163	Unigene0057227	327	615	+	289	-124.7	33.56	1.29	TAGGACCCACCAAATTGGATG	21	5p	tgcctaggcgTAGGACCCACCAAATTGGATGgtgatgcacctattggaatgatctttcatcaatatgttgtccaccaaaaatcaccataatctgattcatcaggctatgtttttaaggctataaagtttagagattaaaaaattaatttaaaatgatgaaattttgagagcttttaaaatatgacttgattaattcaatcattgttatttttggtagacaatatattgaatgaaagaccattcaaatgggctcatcactatctcatttggggggccctatgtctaggtg	.(((((((((((((.(((.((((((.(((((((((((..((((((.(((((.((((((((((((((((((((.(((((((((.((.((.((..((((.((((((.((((((((.((((((.((((((((..(((((((....))))))).........))))))))..)))))).)))))))).)))))).))))..)).)).)).))))))))).)))))))))))).)))))))).))))).))))))..))))))))))).)))))).))).))))))))))))).
novel-m0164-3p	novel-m0164	Unigene0057251	372	572	+	201	-62.1	36.32	0.85	TGAAACTTCAGCCACCCCCTAT	22	3p	gaccacatggacagagggtgggtgaagtttcacctctattaaatcatcctatcttttttgatctttaattggtaaattagggacttagtatttatcaaaatttgaaggtgacttaaaatttgtcatagtttaaaggccaaaatcagaaggctaggaagatgacttgggaTGAAACTTCAGCCACCCCCTATtgatgtattc	....((((.((.((.((((((.((((((((((.(((......(((.(((((.((((((.(((......(((((((((............)))))))))..((((((.(((((.........)))))..)))))).......))))))))).))))).))).....))).)))))))))).)))))).)).)).))))....
novel-m0164-5p	novel-m0164	Unigene0057251	372	572	+	201	-62.1	36.32	0.85	AGAGGGTGGGTGAAGTTTCACC	22	5p	gaccacatggacAGAGGGTGGGTGAAGTTTCACCtctattaaatcatcctatcttttttgatctttaattggtaaattagggacttagtatttatcaaaatttgaaggtgacttaaaatttgtcatagtttaaaggccaaaatcagaaggctaggaagatgacttgggatgaaacttcagccaccccctattgatgtattc	....((((.((.((.((((((.((((((((((.(((......(((.(((((.((((((.(((......(((((((((............)))))))))..((((((.(((((.........)))))..)))))).......))))))))).))))).))).....))).)))))))))).)))))).)).)).))))....
novel-m0165-3p	novel-m0165	Unigene0058718	741	921	-	181	-45.9	35.36	0.72	TAAGGTACTCCACAATTCTACA	22	3p	gtccccatcttgtagattttggagttccttaaaatcaacttttcagaccgaaactcgtttgcaagttgatctaagtgcgttgaaatcatttgtcatctgatgtatttgaatttgctgactaggaatgacatggtcttaatttttggttcTAAGGTACTCCACAATTCTACAttcaatatag	..........((((((.((((((((.(((((.((((((...((.((((((...((.(((.(((((((....((((((((((((...(....)...)).))))))))))))))))).))).))........)))))).))...)))))).))))).)))))).)).))))))..........
novel-m0166-5p	novel-m0166	Unigene0059085	1114	1230	-	117	-39.6	52.99	0.64	CGGAGAACGGCAAGTAAGGCA	21	5p	gacgcagagcCGGAGAACGGCAAGTAAGGCAttgaagctcagatgtggccagaagcatcggagcaaggtatagcgaactgggtgcttggatttgtctgagttttccggccatttcga	........(((((((((((((((((.(((((((.(.((((.(((((........))))).))))..............).)))))))..)))))))...))))))))))........
novel-m0167-3p	novel-m0167	Unigene0059443	689	799	+	111	-45.5	38.74	1.06	TTGATTTTTGTGAGATAGGCT	21	3p	ctattgatgtagcctttctcacaaaaatcacatgaaattggagctttgcccgaatcctatattatggccgaaactcgcatTTGATTTTTGTGAGATAGGCTacatcaccta	....(((((((((((.((((((((((((((.(((...((((.((...))))))..((........)).(((...)))))).)))))))))))))).)))))))))))....
novel-m0168-3p	novel-m0168	Unigene0059480	402	527	-	126	-50.8	36.51	1.1	TATCTGGGCAATATATCAAAT	21	3p	agggttgtagctctgcataccatgtcaaatttgatttgtttcccagataaaaggaagaagaataagagaggaagagagtgtcttctttttcccttTATCTGGGCAATATATCAAATttgatatccc	.((..((((....))))..))((((((((((((((.((((.((((((((((.(((((((((...(((.(.........).)))))))))))).)))))))))).)))).))))))))))))))...
novel-m0169-3p	novel-m0169	Unigene0059544	878	1031	+	154	-31	37.66	0.53	ATGATACATCGTCCCTTTGCAG	22	3p	ggagatcagacagcagatgctagatgtatgttatgcacttcttttttttcataatattttactgcagtcttaaatggctcttccatggttcatgtttcacgtgaatctttcttttcttttgcATGATACATCGTCCCTTTGCAGtcaatggacc	........(((.(((((.(...(((((..((((((((............................((((......)))).......(((((((((...)))))))))............)))))))))))))...).))))).)))........
novel-m0170-3p	novel-m0170	Unigene0059784	1041	1222	-	182	-61.7	37.36	0.91	AACGGGTTCACAATGGATAAT	21	3p	tctatgagaaattatccattgtgaaccagttcacaaaaattggtgtgatcacaactcttggaagagcaaaaagctgccaaccttcaattttaaaattcatcccaaagttcagttcaagggctggggttaatgttcacaccatttcattctaAACGGGTTCACAATGGATAATttctccgttt	.....((((((((((((((((((((((.(((.........((((((((.((......((((...(((.....))).))))..................((((((..((((.......))))))))))...)).))))))))..........))).)))))))))))))))))))))).....
novel-m0171-5p	novel-m0171	Unigene0059796	22	223	+	202	-85.4	35.64	1.19	ATTTAGACACCCGACTTTTCT	21	5p	aaagatggtcATTTAGACACCCGACTTTTCTcctaagagatactttttcaaaatttaaggtgaaattacaattttgcccttctgatttaaaaaaaactctaatcgtccgaacgcacatccgaaggcaaaatggtaatttcaccttaaatttcaaaaaatggtgtctcctaaaggaaaagtcgggtgctaaatggctacccat	.....(((((((((((.((((((((((((((..((.((((((((((((..(((((((((((((((((((.((((((((.(((.(((..............................))).))))))))))).)))))))))))))))))))..))))..)))))))).))..))))))))))))))))))))))))).....
novel-m0172-3p	novel-m0172	Unigene0060307	216	519	-	304	-77.7	28.29	0.9	TTTGAAACATAGTGACTCCATG	22	3p	tctttctttattttttttccttggagtttactggttttaaattcaatttgtatttcaaattctcctgaatgaatcgtcatcaactcggtacttcacttccttctgagttgtattccttgttgaatcgatcatgaaaatcattcccaatggacacaactataaattatcaatttaattgatacattcaaattcaacggaagtgaaatttatatcattgacaattcatccacatggaatttaaaacatataagagcaatttgaaTTTGAAACATAGTGACTCCATGgaaagaaaatttaaaaataa	.........(((((((((((.(((((((.(((((((((((((((((.((((.(((.(((((((..((.((((((.((((............(((((((((...((((((((..((((((..((((.(((.......))))))).))).))).))))).......(((((((...))))))).........)))..)))))))))...........)))).)))))).))...))))))).))).........)))).))))))))))))).))))))))))).)))))))))))..........
novel-m0172-5p	novel-m0172	Unigene0060307	216	519	-	304	-77.7	28.29	0.9	TTGGAGTTTACTGGTTTTAAATT	23	5p	tctttctttattttttttccTTGGAGTTTACTGGTTTTAAATTcaatttgtatttcaaattctcctgaatgaatcgtcatcaactcggtacttcacttccttctgagttgtattccttgttgaatcgatcatgaaaatcattcccaatggacacaactataaattatcaatttaattgatacattcaaattcaacggaagtgaaatttatatcattgacaattcatccacatggaatttaaaacatataagagcaatttgaatttgaaacatagtgactccatggaaagaaaatttaaaaataa	.........(((((((((((.(((((((.(((((((((((((((((.((((.(((.(((((((..((.((((((.((((............(((((((((...((((((((..((((((..((((.(((.......))))))).))).))).))))).......(((((((...))))))).........)))..)))))))))...........)))).)))))).))...))))))).))).........)))).))))))))))))).))))))))))).)))))))))))..........
novel-m0173-3p	novel-m0173	Unigene0061225	26	329	+	304	-71.4	39.14	0.6	TTGGATTTATGGCTCAAAGCC	21	3p	tgttttatttttaggctgagtggtagaatccaaaaagtaacatggatcatcatcatcatcgtagccatcaacaccatctaatggtgttggttttttgagttctcatctccactctaccctatcgaaatccatcatgttacagcctacaaatcttatcatgtccctttttatcaccacaatccaagtttcgatgataaagagctgtgtagcttttttaatgatgctgatgaagacattgcatgggtgctttttcctttctcttcttacagggtgTTGGATTTATGGCTCAAAGCCtgtttgggcc	.((((......((((((((((.(((((.(((((((((((.((((.(((.((((((.((((((....(((((((((((...))))))))))).....(((.......)))..........(((((((((....((((....................))))........................)))))))))..((((((((....))))))))..)))))).)))))).))...).))))..)))))).......((((......))))..)))))))))).))))..))))))...)))).
novel-m0174-3p	novel-m0174	Unigene0061280	2530	2617	+	88	-33.3	45.45	0.83	TGCTAGGATTCAGTTAGGTGA	21	3p	aacaagtgagtccttgattgatcttagcaatcgccaggtagctgcccctggaaatggTGCTAGGATTCAGTTAGGTGAttctgaaact	.......((((((((((((((((((((((....(((((........)))))......)))))))).))))))))).))))).......
novel-m0175-5p	novel-m0175	Unigene0061282	90	158	+	69	-30.5	52.17	0.85	TCCTGATTCCGGCACTTCCCA	21	5p	ggcaacgtgtTCCTGATTCCGGCACTTCCCAggtcactgggagtggaggttttttaggaaatggtgtca	((((.(((.(((((((..((..((((.(((((....)))))))))..))....)))))))))).)))).
novel-m0176-3p	novel-m0176	Unigene0061538	64	181	-	118	-33.1	34.75	0.81	TAAATTGCACAAAGCCCCGTC	21	3p	cccctttaaaggtggaaatcttgtaagcagggttttctgcaatttttgtaaataccattttttacctcccaaaaatgataatttacaTAAATTGCACAAAGCCCCGTCtgtaaatgga	(((((....))).))...........((.(((((((.((((((((.(((((((..(((((((........)))))))...))))))).)))))))).))))))).))...........
novel-m0177-3p	novel-m0177	Unigene0061575	530	652	-	123	-56.2	36.59	1.25	AAAAGGGGAGAGAGCAGTAAA	21	3p	caatcctcatatttactgctctaacccgttttgaatgaaatgcatgcctgcaaaatttcacaagttcagatacattgcatgcattttattccAAAAGGGGAGAGAGCAGTAAAtatgggaatt	...(((.(((((((((((((((..(((.((((((((((((((((((((((...(((((...)))))))).......)))))))))))))).))))).)))..))))))))))))))))))...
novel-m0178-5p	novel-m0178	Unigene0062410	730	873	-	144	-29.5	36.11	0.57	ATTGATGGGATAAATGACTTAGA	23	5p	ccaaccctagATTGATGGGATAAATGACTTAGAagatgatggtgatgttatatccgtggtgatttaactatgtggttctatttgcaatgcttggatgggttatggggccgatcaattatataatttgaattaaaattagctgga	(((.(....(((((((.((....((((((((...((..((.((((......(((((((((......)))))).))).....)))).))..))...))))))))....)).)))))))...((((((......))))))).))).
novel-m0179-3p	novel-m0179	Unigene0062498	1109	1468	+	360	-95.3	44.72	0.59	CATTTCAAGAAACCATGGGCTCA	23	3p	atacagttcgaggattttgcaaaccacaacgcctttgagttgcttgagaaatatagcaagactcacctagttttcaatgatgatatacagggtactgcatctgtggttttagctgggcttactgctgcactgaaggtagttggtggaactttggctgagcacactttcttattccttggtgctggcgaggctggaactggtatagctgaactcatagctcttgagatgtcaaaacagacaaaagctcctgtggaagagtgccgcaagaagatttggcttgtggactctaagggactgattgtcgactgccgcaaggattcacttcaaCATTTCAAGAAACCATGGGCTCAtgaacataaa	...((((((.((...........(((((((((((((.(((.((...........((((((.((((.((((...(((..((((.....(((....)))))))..)))..)))).))))))...))))))))))))))).))).))))..(((((.(..(((((.(.............))))))).))))))).)))))).......(((.(((((...(((((((((((.......(((((.((.((((.....(((((.(((((((.........))))))))))))..))))))..))))).....((....))..........)))))))))))....))))).)))..........
novel-m0180-5p	novel-m0180	Unigene0062641	2755	2884	-	130	-39.1	39.23	0.77	AACGACTTGCCTGGAAAGTAACC	23	5p	cggaaaagggAACGACTTGCCTGGAAAGTAACCatttttacaggaaatgtttaaacacgtttatatattcattaaagatgattatttttcagggcagtgccttccttttgatgcacccaaagggatccgg	((((((((((((.((((..((((((((((((.((((((((..(((.((((............)))).)))..)))))))).))))))))))))..))).).))))))))......(((...))).)))).
novel-m0181-3p	novel-m0181	Unigene0062763	2549	2824	-	276	-97.2	53.99	0.65	TTCCACTATCGTCACTGCTTG	21	3p	cgatagttaccatagcggcggagaagatggattcgagaccgcctctgagaggccttttgcaggagacccagatgatgaaactctagaaatcccgcaggtggaggcgggtcttttgctgccgcccaaggctatgatgcctatcgcgcagttgtcgagtgaagatgacgaggatcatttcattggaatcggcgacgaggtgttggctggggatattgatggagatgggtatccaggcgtggtgcggaTTCCACTATCGTCACTGCTTGgtggcgaaat	.....(((((((.(((((.((.((((.((((((((..((((((((...)))))....(((.(((.(((((..........(((((...(((((.(((.(((.(((((........)))))..)))((((......))))..(((...((((((((((((.(((((......))))))))).....))))))))...)))....)))))))).....))))).))))).)))..))).))).)))).)))))).)).)).)))))))))))).....
novel-m0182-5p	novel-m0182	Unigene0063337	760	892	+	133	-49.7	51.88	0.72	TCGGACGCAGCGGTTTACCGACC	23	5p	tgtggtgtctTCGGACGCAGCGGTTTACCGACCaattcctggcctgtggcgcttgcttgatggattggttgctctgcattgaaagatgaaacaggaatcggtcgataaacctctgcatccggttttcctgcag	(((((.....(((((.((((.((((((.(((((.(((((((.((...(((....)))....)).((.(((..((......))..))).)).))))))).))))).)))))).)))).))))).....))))).
novel-m0183-3p	novel-m0183	Unigene0063546	252	396	+	145	-47.2	35.17	0.93	TTCCAAGAAAGTTCGTTCCTT	21	3p	ttggatgcgtggaaaggaaattactttctcggaaaataacctttctttaacactcctccaacccacccaaaaaaatgagtttctcatttatgttttagttaaaaaatggttattTTCCAAGAAAGTTCGTTCCTTgctgcatcca	.((((((((.(..((((((...(((((((.(((((((((((.((.((((((.....................(((((((...)))))))........)))))).)).))))))))))).)))))))...)))))).)))))))))
novel-m0184-3p	novel-m0184	Unigene0063678	149	231	-	83	-36.8	45.78	0.97	CTGAGTTTTTGTATCGGCCGAGA	23	3p	gggtcaaaaactcagccgaactcaaaaattcagccaaactgatatttcggCTGAGTTTTTGTATCGGCCGAGAtttcgggcca	.((((..((((((.(((((...((((((((((((((((......))).)))))))))))))..))))).))).)))..)))).
novel-m0185-5p	novel-m0185	Unigene0064201	1453	1668	-	216	-43	39.81	0.5	TCCAATGGTAGATCAAGTCAT	21	5p	acctgacgtaTCCAATGGTAGATCAAGTCATcaagaccctaccaaatgtatccaacggtagatcaagtcatcaaggccttatcgacacaatcaacggtggatgaagttattaagcctcctaacattgaaaggacttcatcactattgttgaaagagtagtgctaaaagagttaatcctgaaaggacttcatcagtagtattggaaggacttcacta	...(((.((.(((((((.(((((.(((((.(((.((..(((((.............)))))...((.((.....(((((..((.......((((((((((((((((((.((((...........))))...))))))))).).))))))))..))..)).)))....)).))..)).)))...))))).)))..)).)))))))...)).)))...
novel-m0186-3p	novel-m0186	Unigene0064286	87	184	+	98	-46	50	0.94	CGAGAGTCTCACGTCAGTTGT	21	3p	atttccccctcacaattgatgtggaactctcgttcgcaccctaacaattccctcctcgaacgagaaaCGAGAGTCTCACGTCAGTTGTaagggggaga	.(((((((((.(((((((((((((.(((((((((....................(((....))).))))))))).))))))))))))).)))))))))
novel-m0187-3p	novel-m0187	Unigene0064320	707	961	+	255	-60.3	41.57	0.57	TGGCCTAGAGATTACAAGAAG	21	3p	ctgctgctgttctatttgaagttttaaaggctgtcaatcagacacactcagttgaagttgatcatgagattttagaagttcacaataaagttgctgaaaagacggagatttatgtgccctacaatattcttcctcttgatcctgatagtgcaaaccaggctgttatgcgctatcctgagattcaagctgctgtttttgcacttcggaacactaggggtctaccaTGGCCTAGAGATTACAAGAAGaaggtagacg	...(((((.((((.((((.((((((..((((((((.....))))..(((((((((((((........))))))))...((((((((...)))).))))((((.(((((....((((...))))....))))).))))......((((((((((((......))).)))))))))))))).((((((.(((.......)))))).))).......((.....))...)))).)))))).)))).)))))))))...
novel-m0188-5p	novel-m0188	Unigene0064320	2360	2556	+	197	-52.2	40.1	0.66	TCAATGGCATGAATTCTTTCC	21	5p	taacaacattTCAATGGCATGAATTCTTTCCacgagcgaagaacaatataggtgttgtggttgcactgtgggctcccatcattcttgtttatttcatggatacccagatctggtatgctattttctccacaatctttggaggtatttatggtgcgtttcgtcgccttggagagattcgaacattagaaatgttaaga	....((((((((((((...(((((.(((((((.(.((((.(((....(((((.((.((((..((.......))..)))).)).))))).......(((((((((.......))))).))))...(((((.......)))))(((((...)))))..))).))))).))))))))))))..)))).))))))))....
novel-m0189-3p	novel-m0189	Unigene0064369	401	606	-	206	-60.6	45.63	0.64	AGGCATGTATCTCTCAGAGG	20	3p	atgatgtccctatctgaagaagattgcatgtcaacagttcaatgcacaaatggcaatgaaagtaagcatgcgtgttcatttcctccccatgcgattcctaagatgtttatgaggagtgatgtgagaaagtcatggaggctccgttgtagatggtggtctgcccgccatttttgcaaAGGCATGTATCTCTCAGAGGtggaagaggg	......(((((.(((((.((.(((.(((((((.....((((.(((.......))).))))(((...(((((...(((((.((((((.((((....((....))....)))).)))).)).)))))...).))))...)))...(((((((((((((.....))))))))..))))).))))))))))))))))))).)))......
novel-m0190-5p	novel-m0190	Unigene0064431	62	289	+	228	-78.6	40.35	0.85	CCACTTTGGATGGCCGAACCC	21	5p	ttgggttcggCCACTTTGGATGGCCGAACCCcatgagattatttggttggtttgatggttttaaaggctaaaaaccatacaaaaaccatggagatttgtacatgatctaaggagactcaaaatatatgttgtggccgaattaatcaatggtttaaaattgtatgatgaggtttaaaagatagaagatatgggccatagggttcggccactttggttggccgaacccca	..(((((((((((((..((.(((((((((((.(((......((((..((((((..((((((...)))))).))))))..))))..((.((((.............)))).))...((((.....(((.((..((((..((((..((((........))))..))))..))))...)).))).......)))).))).)))))))))))))..)).)))))))))))..
novel-m0191-5p	novel-m0191	Unigene0065013	253	536	+	284	-72.6	40.14	0.64	TGTTCCGGCTAGTTCTTTTGC	21	5p	tctaagcattTGTTCCGGCTAGTTCTTTTGCaggtattgatagagcaagtttttggggcccagctaaatctttttcatgctttggtataaatgcagtgtcaatcttgccatttctgaagtcctcaacatcaaggatgagtttgtgataatctattgttgtaggaattcctgtgataatggtatcgttaagagcccttttcatccgttcaattgctttctctcttgttggagcccaaacaattagcttgcctagtaaagagtcgtagctgggaggaacaacatag	........(((.((((((((((((((((.((((((.......((((.((((((((((..(((((..............(((((((...((((((((........))).))))))))))))...(((......((((((((((.((((.(((((((((((((((....))))))))))))).)).)))).)))).....))))))......)))...........)))))..)))))).)))).)))))))).)))))))).).))))))))).)))........
novel-m0192-5p	novel-m0192	Unigene0066279	2286	2371	+	86	-18.9	43.02	0.51	TGAGGACCCATATTGACTATC	21	5p	tgaggggtggTGAGGACCCATATTGACTATCatgaggtcttttcttgtagccggtacattcatatgttttttccccgattccttat	((((((((((.(((((..((((((((((..(((((((.....)))))).)..))).))...)))))..))))).)).)))))))).
novel-m0193-3p	novel-m0193	Unigene0066279	1769	1902	-	134	-32.4	35.07	0.69	ACGGGAGTTGTTGAATATCAA	21	3p	aggtatgcgaatgatgcataattatttccgtatcggaggagtagctgctgatctaccttatggctggatagataaatgtttagatttctgcgattattttttaACGGGAGTTGTTGAATATCAAaagcttatta	..(((.((...(((((..((((.((((((((((((.((((((....((..(((((((........)).)))))....))....)))))).)))).........)))))))).))))..)))))...)).)))..
novel-m0194-3p	novel-m0194	Unigene0066437	42	173	+	132	-56.1	35.61	1.19	TTTTCCGGGGAAGTGCTTTCC	21	3p	tgcgtggaaaggaaagtgctttcttggaaaataaccattatttagctgaaagcctgaaactggaaaacgttttcaccatttttgttaaaaaataattgttcTTTTCCGGGGAAGTGCTTTCCtttccatgaa	..(((((((((((((((((((((((((((((.(((.((((((((((.((((...(((((.((.....)).)))))...)))).))))...)))))).))).)))))))))))))))))))))))))))))..
novel-m0195-5p	novel-m0195	Unigene0066911	23	156	-	134	-39.3	45.52	0.64	TTCGATTCACGCTCAACACCC	21	5p	aggtcttgaaTTCGATTCACGCTCAACACCCtgctaggccactttccgtagttgcttacttggtgtgtgtgggattgagagacatgcacatctcatgaaaggaggtcttgagtttgattcacgtttaacacctt	((((.((((((..((.(((.((((((.(((((..(((((.(((......))).)))))...((((((((((...........))))))))))........)).))).)))))).))).))..)))))).)))).
novel-m0196-3p	novel-m0196	Unigene0067069	525	649	-	125	-45.2	47.2	0.77	TGCTCGGAACTTGGCCTCGGT	21	3p	cctcggtacttccgagtcaagttccgagagttcggaacaacaaacattccctcggtactttcgaggctttataggtttcaattctgtattacaaTGCTCGGAACTTGGCCTCGGTacttctgagc	.(((((.....(((((((((((((((((.(((.(......).)))....((((((.....))))))...((((((.......))))))........)))))))))))).))))).....))))).
novel-m0197-5p	novel-m0197	Unigene0067108	176	426	-	251	-55.3	41.04	0.54	TAGCACTGATCTTTGATTGTAG	22	5p	cctctcatttTAGCACTGATCTTTGATTGTAGgcatgaaaaatacttgactcagttcagggcaatgtttgtttttaactgcaagatcaagagcgaccagatacttcggcagaggaaacctaaaacaaggcgacatagacgcagcttagattctgacaaagtcacaaaagatgacgagaaggatacattatacaggccagtttgctgctctatttgctctacagaagttggagtctttgatgaagaagaggt	(((((..(((((.((..((.(((((((((((((((.........((((((((((((.(((((((...))))))).)))))..)).)))))............((((....))))...(((......)))....(((((.(((((....(((((......(((((....).))))....)))))...................)))))))))).))).)))))...)))))))))..)).))))).))))).
novel-m0198-3p	novel-m0198	Unigene0067254	1241	1365	-	125	-59.9	46.4	1.03	TAGTCGAATCAGCGAAAGAGTC	22	3p	gtggattcttcctcttccgactctttcgttgttccactgctcttttgaggaggagagagcctacttttctcttttaacaggcgTAGTCGAATCAGCGAAAGAGTCagaggagaagagtcgtttca	...((((((((.(((((.((((((((((((((((.(((((.(((..(((((((((((......)))))))))))....))).))))).))).))))))))))))).)))))))))))))......
novel-m0198-5p	novel-m0198	Unigene0067254	1241	1365	-	125	-59.9	46.4	1.03	CTCTTTCGTTGTTCCACTGCT	21	5p	gtggattcttcctcttccgaCTCTTTCGTTGTTCCACTGCTcttttgaggaggagagagcctacttttctcttttaacaggcgtagtcgaatcagcgaaagagtcagaggagaagagtcgtttca	...((((((((.(((((.((((((((((((((((.(((((.(((..(((((((((((......)))))))))))....))).))))).))).))))))))))))).)))))))))))))......
novel-m0199-5p	novel-m0199	Unigene0067275	721	836	+	116	-28.6	47.41	0.52	AACAGATTGCTTCTTGCTACGCC	23	5p	agtgagtaatAACAGATTGCTTCTTGCTACGCCagcagactaaatgagaaccctagaagacgcaataactagtggtggagcagcggctagcaggagagccgatccaagctacatta	(((((((.......(((((((((((((((.(((.((.(.((........(((((((............)))).)))..))).))))))))))))).)).)))))...))).)))).
novel-m0200-3p	novel-m0200	Unigene0067412	1236	1324	+	89	-23.4	37.08	0.71	ATATATTGGTTGTGCTCGAAA	21	3p	gaccataacataatcgacatatccaagatgtactcctacaaagaaagggggttcgaatATATATTGGTTGTGCTCGAAAggttatgaat	...((((((....((((((((.((((.((((((((((........))))).......))))).)))).)))).))))...))))))...
novel-m0201-3p	novel-m0201	Unigene0067418	475	640	-	166	-28.8	37.95	0.46	CCTTGGGTCACTGGCCATTCGC	22	3p	ggaaattcataaaaagaaatcaatcaaaaaaaagggggggcgaagtgatacaaaaagaactctgtgcaattttgttagccctatctattctataagaggaaagcatatgaaaaatgtaaccgattctttcgtttCCTTGGGTCACTGGCCATTCGCtgggagtttc	.(((((((........................((.((((((..((((((.(((((((((.((.(((((.((((..((((....(((........))).....)).))..)))).))).)).)))))))).......))).)))))).))).))).))..)))))))
novel-m0202-3p	novel-m0202	Unigene0067419	135	300	-	166	-28.8	37.95	0.46	CCTTGGGTCACTGGCCATTCGC	22	3p	ggaaattcataaaaagaaatcaatcaaaaaaaagggggggcgaagtgatacaaaaagaactctgtgcaattttgttagccctatctattctataagaggaaagcatatgaaaaatgtaaccgattctttcgtttCCTTGGGTCACTGGCCATTCGCtgggagtttc	.(((((((........................((.((((((..((((((.(((((((((.((.(((((.((((..((((....(((........))).....)).))..)))).))).)).)))))))).......))).)))))).))).))).))..)))))))
novel-m0203-3p	novel-m0203	Unigene0067429	4317	4463	-	147	-28.5	42.18	0.46	GGAGATAAGCGGATGAGTTCATC	23	3p	ggattggcttatagcccttacatatacccagcttgacctccctaaccttaacctaccttttttcggaatcttattcgttgatcttctcttccctttctttatcattatacggatGGAGATAAGCGGATGAGTTCATCagccccaatc	.((((((.....(((...............)))......................((.......))..........((((((...(((.((((((((((((((........)))))))).))).))).)))...)))))).))))))
novel-m0204-5p	novel-m0204	Unigene0067430	99	339	+	241	-63.1	41.49	0.63	TTGGGAATAACGAGGGCATCT	21	5p	gttaccctttTTGGGAATAACGAGGGCATCTttgaatactcaaagtttcatatctgaagtgagttttcaagaaaccgcttgatttagcaaaagccgctctacgaggtcgtattgattggttgaaaggcctgaggtttggagagttgtaaggtcgcaaaatatacaataaagaggtggtatggggagatataataactttcttctttggtgacctgcctgaccagatttcaatgggggtgtc	..(((((((((((.((((..((((((..((((.(((.(((((...(((((....)))))))))).)))))))..)).))))))))..)))))(((..((.((..((((.....)))).)).))..))).((((((((((..((..(((.((((((....(((((.((......)).)))))((((((...........))))))...)))))))))))..))))))))))...))))))..
novel-m0205-3p	novel-m0205	Unigene0067723	1489	1791	-	303	-48.8	33.33	0.48	GCAAGTGATGATAACATAGACA	22	3p	aagaccttccttcatgaggtcatcccccccatgttttgcctttttctttctttctttttgttcaggctatcaatttttttagtgttttgggatttttgcagtctaggtgtgggactttttaaattagttttcctttttgctggctttttaatcagtttatcgaggtcaagtgtttaattttttcattccaaatttgtgtatttgtttttacttttaattagttttatcttgatccctctagagaggtgttcattgtatggttttttcttttGCAAGTGATGATAACATAGACAgggacatcca	..((((((.......)))))).((((.((((((....((((......................))))...))...............))))..............((.((((((....((((((.(.((..((((...(((((........))))).....))))..)).)))))))...)))))).)).....(((.((((((((.((((((.(((..((...(((..(((.(((((....)))).).)))..))).........)).))).)))))).))))).))).)))))))......
novel-m0206-5p	novel-m0206	Unigene0067773	203	280	-	78	-31.5	42.31	0.95	TGCACCGACCGAATCACTTTC	21	5p	tccaaattggTGCACCGACCGAATCACTTTCcttaaatttccattttcaagtgatctggtcaggtgtaccgattcagt	....(((((((((((((((((.(((((((...................))))))).))))).))))))))))))....
novel-m0207-3p	novel-m0207	Unigene0068045	1626	1766	-	141	-51.1	32.62	1.11	TTCCAAGAAAATAATTTCCTTT	22	3p	gttttgtttggatgcatggaaaggaaatgctttcttggcaaatgcccagttttaactaaaattccattggttcaaccatttatggttaaacatagttatTTCCAAGAAAATAATTTCCTTTcattgcatccaaacaactac	...(((((((((((((..((((((((((..((((((((.(((((......(((((((((((......((((...))))))).))))))))......)))))))))))))...))))))))))..)))))))))))))....
novel-m0207-5p	novel-m0207	Unigene0068045	1626	1766	-	141	-51.1	32.62	1.11	AAGGAAATGCTTTCTTGGCA	20	5p	gttttgtttggatgcatggaAAGGAAATGCTTTCTTGGCAaatgcccagttttaactaaaattccattggttcaaccatttatggttaaacatagttatttccaagaaaataatttcctttcattgcatccaaacaactac	...(((((((((((((..((((((((((..((((((((.(((((......(((((((((((......((((...))))))).))))))))......)))))))))))))...))))))))))..)))))))))))))....
novel-m0208-5p	novel-m0208	Unigene0068125	58	258	-	201	-45.4	35.82	0.63	TTTGTAAAAATCGGTCGAGAA	21	5p	tgataccttaTTTGTAAAAATCGGTCGAGAAacggcctcgtttgaaaattctactccagccatcgttagaaggaatctattcgaactatttgttcgaacaaaccacacggtcgttcgaatgacgcacacaatcatttttttcctttaaaagcgaaggtcaaaatgataatttcatctgattttttgaaattagatgtgtag	..((((((.((((..(((((((((..((((....((.(((((((((.(((((..((.(((....))).)).)))))...(((((((.....)))))))...(((....)))..))))))))).)).....((((((((...(((((......)))))..))))))))..))))..)))))))))..)))).))..))))..
novel-m0209-3p	novel-m0209	Unigene0068155	296	384	-	89	-40	41.57	1.08	ATATCGGCCGATACATATTGTAT	23	3p	aatatcagccgataacgatatatatcggccaatattcactccttcaaaaccggtgcATATCGGCCGATACATATTGTATcggccgatat	.(((((.(((((((.((((((.((((((((.((((.((((...........)))).)))).)))))))).))))))))))))).)))))
novel-m0210-5p	novel-m0210	Unigene0068254	454	543	+	90	-45.9	48.89	1.04	CGGGTCGGGTTGGGTTCAATA	21	5p	taattcgggtCGGGTCGGGTTGGGTTCAATAtgttgtaacatgggttaaggttggatttattaaaacccgacctgcccgacccgagttgc	((((((((((((((.(((((((((((.((((.(((.((((..........))))))).))))..))))))))))))))))))))))))).
novel-m0211-5p	novel-m0211	Unigene0068375	795	1071	+	277	-73.2	45.13	0.59	ACGTTGACTGGAAGGAAAGAG	21	5p	gggcttggaaACGTTGACTGGAAGGAAAGAGtggaagggtggaaacttaagcaagagaaaaatatgatgcaaatgaccagcagatacactgatggaaaaggagatatggaaggaactggttcaaatggtgaagacctgcaaatggctgatgatgctcgtcaacctttgagccgtgtggttcctattgcctcttcccacctgactccatatcgggttgttattgttcttcgcctcattatcttaggtttcttccttcaataccgagttactcatcccg	((((((((....(((((..((((((((.(((.....((((((((((...(((((.............(((.........)))...........((((.(((.((((.((((...(((((((((((.(((...(((..(((.((.....))..)))..))).)))))))))))).))..)))))))).))).))))..(((((.......))))))))))...))).)))))))......)))...)))))))).))))).)))))........))).
novel-m0212-3p	novel-m0212	Unigene0068396	214	318	+	105	-45	46.67	0.92	AAAGCAGGAACAGATTGGAAA	21	3p	gtgcatgcttttctccattctgtaccggccttcacgatgggcgcattagtcatgaggagtttgtggccatgatgAAAGCAGGAACAGATTGGAAAaaagcatcaa	.((.((((((((.((((.(((((.((.((.((((..((((.((((..(.((.....)).).)))).))))..)))).)).)).))))).)))).)))))))))).
novel-m0213-5p	novel-m0213	Unigene0068573	88	373	-	286	-93.1	53.15	0.61	TCCGTGTTTGTCGACAGCTA	20	5p	tgagccattgTCCGTGTTTGTCGACAGCTAtggaaccgggaagatcccagacaaggagatcttgaagattgtgaaggagaactttgacttccggccagggatgatttccatcaaccttgacctcaagaggggaggaaatgacaggttcctcaagacggcagcctatgggcacttcggcagggacgaccccgatttcacctgggaggttgtaaagcccctcaagtgggagaaacccagtgcctaagatgctctcatcagttgacgatgaataacggccagccgccct	...((..(((.((((((((((((.(((((((((..(((((((((((((......)).)))))........((.((((....)))).)))))))).(((((.((((....)))).))))).(((....))).((((((........)))))).....((((..((.((((((((((((..((.....))))))((((((.((((.((((....)))).)))).)))))).......)))))))))).)))).)))).))))).)))))))).)))).)))..))...
novel-m0214-5p	novel-m0214	Unigene0068819	383	735	-	353	-100.5	38.81	0.73	CATAAACAGTAAATTGGCTCACC	23	5p	acgaaattcgCATAAACAGTAAATTGGCTCACCaaaattcgcatgaacagtaaattgactcaccgaaaatttactgttcatgcaaatggtctgattttactgttcatgtaaagggtacaattgacaatacactaaaatctatgtcggattacacaaatatccgtgggaggatcgttacctgtgtatttgttgcatcatagtttatttatttacaaatatatgggtgtaactcagatgggtgtaattcaactggttgcctctcgtctcaaaaagcggacagttgcgtgttcgaacctctatagcctaacttttgtgtgccctatgggtagtgggctcacctatgaggattttgc	.((((((((((((.(((((((((((((...((((...((.((((((((((((((((...........)))))))))))))))).)))))))))).))))))))).))))...(((((((............(((.........((((((.((.(((...(((((((((.((.....((((((((((((((.....................))))))))))))))(((((.(((.(((((...))))).))))))))...)).)))).....)))))...))).)))))))).......)))...........)))))))(((((((((....)).))))))).)))))))).
novel-m0215-3p	novel-m0215	Unigene0068937	3367	3556	+	190	-57.3	41.05	0.73	TCTTTCATCCTGGTCGGAGGA	21	3p	atggtatatctcaccatagaggatgataccaaggatctttatttgtttataaactctcctggcggatgggtaatcccaggaatagctatttatgacactatgcaatttgtgtcacccgatgtgcatacaatatgcatgggattagccgcttcaatgggaTCTTTCATCCTGGTCGGAGGAgaaattacta	.((((((.((((......))))...))))))......................((((.((((((((((((..((((((.....(((......(((..(((((((..(((((((((.....))).))))))..)))))))..)))...)))....))))))..)))))))..))))).)))).........
novel-m0216-5p	novel-m0216	Unigene0068937	4464	4588	-	125	-28.7	33.6	0.68	AGAATGGGCTGGTTTAGATCGA	22	5p	aatcatacacAGAATGGGCTGGTTTAGATCGAtcctaaccggatgattatgaattacttccatttacaatttgatccaggtaagaagataaaagatcaaatcacagttcattccaattatgattc	(((((((....(((((((((((.((.((((.(((((.(((((((((((.(((((.......))))).))))..)))).))).))..)))....)))).)).).))))))))))....))))))).
novel-m0217-5p	novel-m0217	Unigene0069047	43	206	+	164	-56.5	48.78	0.71	TTACAAATGGTATCAGAGAAC	21	5p	agacggggcgTTACAAATGGTATCAGAGAACgattcaactctctaactgtggattagagccggagatggctctggttttaagggcgtcaaggagggtgccagtaaaagtcccacatcgcttggtatgagagtttctctggtatatatgaggaatgcctccctcc	.((.(((((((..(..((((((((((((((.......((((((..(((((((.((((((((((((....)))))))))))).((((((......))))))..........)))).......)))..))))))))))))))))).)))..)..))))).)).)).
novel-m0218-3p	novel-m0218	Unigene0069939	11	85	+	75	-18.8	38.67	0.65	TGCACGACCTTATTCATGATC	21	3p	ggatgtatcaaaagatgaattgggtgagatcaagtattgcaaaaTGCACGACCTTATTCATGATCttgcagcatc	.(((((.....(((((....((((((((.((..(((((....)))))..)).))))))))..)))))...)))))
novel-m0219-3p	novel-m0219	Unigene0069940	11	85	+	75	-18.8	38.67	0.65	TGCACGACCTTATTCATGATC	21	3p	ggatgtatcaaaagatgaattgggtgagatcaagtattgcaaaaTGCACGACCTTATTCATGATCttgcagcatc	.(((((.....(((((....((((((((.((..(((((....)))))..)).))))))))..)))))...)))))
novel-m0220-5p	novel-m0220	Unigene0070450	2196	2450	+	255	-52.3	40.78	0.5	TAGAGCTCCTTGTAAGGCTTGT	22	5p	tcagagttccTAGAGCTCCTTGTAAGGCTTGTtggaaaactcgttgccggacctgattaattgctctttgttgttcaaaatgaatggtttcatttttgtaattttctaatcgttccaaattctcataagtggcattaatcaaattccatttttctcgttctatctcagagtatccattcactcgaaactcatctgcttctctttccactttccgtaagcgagcccgggctttttcgagctgctcaatggctcctc	...(((((....((((..((((.((((((((..((....((((((..((((..((((((((.(((.(((((.(........((((((((..................))))))))........)))))).)))))))))))..........................((((.((.........)).))))....................))))..))))))))))))))))..))))..))))...)))))...
novel-m0221-5p	novel-m0221	Unigene0070471	572	716	+	145	-53.7	33.1	1.12	CAACTCTACGAAACAATGTTACT	23	5p	tactaaagatCAACTCTACGAAACAATGTTACTtatgcaatttaagtcaatggttgttggctgtcaaccattttggtgttgatgtttcatgatcattgttttagattggatggttggcattgttaaatggagttgatatttggaa	..(((((.((((((((((...((((((((((.((((.(((((((((.((((((((((.(((.(((((((......).)))))))))..)))))))))).))))))))).)))).))))))))))...)))))))))).)))))..
novel-m0222-5p	novel-m0222	Unigene0070540	536	803	-	268	-81.8	44.03	0.69	CTATTTTGGTAAACTTGGCTC	21	5p	ttctcgacaaCTATTTTGGTAAACTTGGCTCtggtagcaaggcatatgtcttggatagtcttgttacttctcaaaaatggcacatttactctgcttctgcagaatcagcaagctgtcctgtttatacactggaaatgtgcatgactggtttggacaggaagcgggcttccgtgttctacaagacagagacaagcactgcagccaggatgactgatgcttcaggcattaggaaaatcttaccggggtccaagatttcagattttgagtt	..(((((.....(.(((((.((.((((((((((((((((((((....))))))(((((.((((((..((((((.....((((.........))))..)).))))..))))))))))).(((....)))((((....((((.((.(((..((((((((((((....))))).))))...)))..)))...)).)))).....))))(((..((((((((...))))))))....)))))))))))).))))).))))))).))))))..
novel-m0223-5p	novel-m0223	Unigene0070805	832	914	-	83	-41.7	54.22	0.93	TGGAGAGTTAGAGCACGTGCG	21	5p	gtgtccaaggTGGAGAGTTAGAGCACGTGCGagattctctaagggagcaaatagcacgtgccctgcttctccaccatggcttg	....(((.(((((((((.(((.((((((((......((((...))))......)))))))).))).))))))))).)))....
novel-m0224-3p	novel-m0224	Unigene0070982	2209	2534	-	326	-107.5	42.64	0.77	TTCTTATGTGGAGAATTCACT	21	3p	ttgcattttgtaccaacacaagtgaattctccacataagaacgttctatcatgtgtatcgaatggtttggagaagtcatgcatactcttgatggaacacgcttctgcagatgatcttgtacaaaaaaatggtggggaaacaaccctccacttagccatccttgataacatactggagttgcacaaacgcatgctcgagatttgtcttgacctgggcgataaacaatgcggagacgcacgccgctcatcctcgcttggaagatcagtgcctacagacaatcgaataTTCTTATGTGGAGAATTCACTcatgtttgtacaaaatttag	....(((((((((.((((..(((((((((((((((((((((.(((((((((.(.((((.(.(((((((....))))))).))))).).)))))))))........(((..(((((((.((.........(((((((........)))))))...(((..(..(((((.((.((.(((((((......))).)))).)))))))))..)...)))((((........((((.(.....).))))......)))).)).))))))).))).................)))))))))))))))))))))..)))).)))))))))....
novel-m0224-5p	novel-m0224	Unigene0070982	2209	2534	-	326	-107.5	42.64	0.77	AGTGAATTCTCCACATAAGAA	21	5p	ttgcattttgtaccaacacaAGTGAATTCTCCACATAAGAAcgttctatcatgtgtatcgaatggtttggagaagtcatgcatactcttgatggaacacgcttctgcagatgatcttgtacaaaaaaatggtggggaaacaaccctccacttagccatccttgataacatactggagttgcacaaacgcatgctcgagatttgtcttgacctgggcgataaacaatgcggagacgcacgccgctcatcctcgcttggaagatcagtgcctacagacaatcgaatattcttatgtggagaattcactcatgtttgtacaaaatttag	....(((((((((.((((..(((((((((((((((((((((.(((((((((.(.((((.(.(((((((....))))))).))))).).)))))))))........(((..(((((((.((.........(((((((........)))))))...(((..(..(((((.((.((.(((((((......))).)))).)))))))))..)...)))((((........((((.(.....).))))......)))).)).))))))).))).................)))))))))))))))))))))..)))).)))))))))....
novel-m0225-3p	novel-m0225	Unigene0071040	661	770	-	110	-26.9	31.82	0.77	TGGCCAATGATGAGAAACAAAA	22	3p	catgcatgtcgcttctgtgacttgtgattggctttcatgtttgtttattattattattgttatttgatttttatgttaTGGCCAATGATGAGAAACAAAAtgactgagct	((..((((((((....)))))..)))..))((((((((.(((((((.((((((((...(((((...((....))...))))).)))))))).)))))))))))..)))).
novel-m0226-3p	novel-m0226	Unigene0071416	35	162	+	128	-50.9	54.69	0.73	CGACCCGAGTTGCAGCCCTAC	21	3p	tcgggttttttcattcgggtcgggtcgggttgggttcaatatggagtaagttgggttagggttgggtttatgaaaacccggccggccCGACCCGAGTTGCAGCCCTACacctacctatacctccaacg	.(((((......)))))(((.((((.((((.(((((((((.(((.....((((((((..((((((((((....))))))))))))))))))))).)))).))))).)).)).))))..))).......
novel-m0226-5p	novel-m0226	Unigene0071416	35	162	+	128	-50.9	54.69	0.73	CGGGTCGGGTTGGGTTCAATA	21	5p	tcgggttttttcattcgggtCGGGTCGGGTTGGGTTCAATAtggagtaagttgggttagggttgggtttatgaaaacccggccggcccgacccgagttgcagccctacacctacctatacctccaacg	.(((((......)))))(((.((((.((((.(((((((((.(((.....((((((((..((((((((((....))))))))))))))))))))).)))).))))).)).)).))))..))).......
novel-m0227-3p	novel-m0227	Unigene0071806	250	467	+	218	-97.4	42.66	1.05	CATTTCCTTTCAGCCATCCTCTCT	24	3p	gtataatcaaagaggatgactaagtgcaatgcttgtttagcctccttagaggggcaatgcttgtttagcattcttaacctttcttggttggttggtcactagtggggatgttgtagggtaatgcacaagtgttggaatgctactagtggctaaccaattgagaaagtctgaggaggtcaaataggCATTTCCTTTCAGCCATCCTCTCTgattctaca	(((.(((((.((((((((.(((((.(.(((((((((((.(((((((((((.(((.((((((.....)))))))))...(((((((((((((((((((((((((((.............((((((....)))))).....)))))))))))))))))))))))))))))))))))))).))))))))))).))))..)).)))))))).))))).))).
novel-m0227-5p	novel-m0227	Unigene0071806	250	467	+	218	-97.4	42.66	1.05	AGAGGATGACTAAGTGCAATGCT	23	5p	gtataatcaaAGAGGATGACTAAGTGCAATGCTtgtttagcctccttagaggggcaatgcttgtttagcattcttaacctttcttggttggttggtcactagtggggatgttgtagggtaatgcacaagtgttggaatgctactagtggctaaccaattgagaaagtctgaggaggtcaaataggcatttcctttcagccatcctctctgattctaca	(((.(((((.((((((((.(((((.(.(((((((((((.(((((((((((.(((.((((((.....)))))))))...(((((((((((((((((((((((((((.............((((((....)))))).....)))))))))))))))))))))))))))))))))))))).))))))))))).))))..)).)))))))).))))).))).
novel-m0228-5p	novel-m0228	Unigene0071924	1163	1247	-	85	-24.1	49.41	0.57	TTGGCTTGACGGTTAAGAACC	21	5p	cccgtgagtgTTGGCTTGACGGTTAAGAACCgcaataagttgtgggaggttttgggttcaagtctcactctcaacatgtaagggc	(((..(((((..(((((((.(.((((((.((((((....))))))....)))))).)))))))).)))))...........))).
novel-m0229-5p	novel-m0229	Unigene0072160	1803	2047	-	245	-139.3	49.39	1.15	AAGACGAGAAAACGGTCAGCTGT	23	5p	agagaggaagAAGACGAGAAAACGGTCAGCTGTggcggtggtgggattgtaggaggggttttgctgacttctttgcaatgggactgcccctacccacatgtgcatgtttgttccttgccttttcattttcaccccttagatttttctagctctgcacatgggtaggggtgggaagcaaaaggcaaagaacgactttgcacatgtgggcgctacagctgcctgttttcttgtcttcttcctctttc	(((((((((((((((((((((((((.((((((((((((((((...(((((((.(((((((.....))))))))))))))...))))).....((((((((((((...((((((.(((((((((..(((((((((((((((....))))((((.......)))))))))))))))..))))))))).))))))...))))))))))))))))))))))).))))))))))))))))))))))))).
novel-m0230-3p	novel-m0230	Unigene0072548	478	609	-	132	-51.7	43.18	0.91	CGGGATTTGGTCAAACTTGGTCA	23	3p	gttgacccttgttgaccggggtttgatgtgatcccttttaacccgattatcttcgttgcgtcaagttatcgcttgactagtgaaagttgtcgagttttaCGGGATTTGGTCAAACTTGGTCAactagtcaaa	.(((((....((((((((((.((((((..((((((.(..(((.((((.((.(((((((.(((((((....)))))))))))))).)).)))).)))..).))))))..))))))))))))))))..))))).
novel-m0231-3p	novel-m0231	Unigene0072735	43	393	+	351	-79	36.47	0.62	TTGGAGGGCTTCAACAACACT	21	3p	acacttcaccaaaattgtattgagtctctccaaacataggtcacatacagtattttgatttacaattagatggaccatgcacagagctcttggatttatagaaaaaaaaatgtacaattataaacagctgcatttatgttcttggaaggaagttaatgtaattttctgacagcagctcttggatgataatgaagcatttcttcccacatcaactccctaatcatctccacctctaaatccatatcaatgtctttgagattgattgggctctttgctgatgggtctaactttggatcataaatttctgacatgtatgggtgTTGGAGGGCTTCAACAACACTgattctcctt	..............((((..((((.((((((((.(((.....((((.(((.(((((((((((...((((((...(((((((.(((((((.((((((((.((........................((((((...........((..(((((((((...)))))))))..))))))))...(((((((...((((.....))))....))))..)))..............)).)))))))).((((((.((...)).)))))).))))))).)))..))))))))))...))))))).))))..)))..))))....))))))))))).))))))))..............
novel-m0232-3p	novel-m0232	Unigene0072846	71	173	-	103	-25.2	43.69	0.56	AATTCCGCCAAGATCTCTTCGTT	23	3p	gtttcccatctcttctcgagaaacaagcggggtatttctttgcaaaattgtgctcaatttcatatgtggcAATTCCGCCAAGATCTCTTCGTTagttggggga	.(((((((((((.....)))).((.(((((((....((((.((..((((((.(.((........)).)))))))..)).))))...))))))).)))))))))
novel-m0233-5p	novel-m0233	Unigene0072966	1278	1559	-	282	-84.1	45.04	0.66	TCTGAAGGATACTGTGCTAGAGC	23	5p	gtcaatatagTCTGAAGGATACTGTGCTAGAGCtggagttccaaggtgttaaaaagcaatttaccatgcttcagacatggcctgtgcgaacaccaaggcctgttgcatcaaagctagctgcagatacacctctattgactgggcagcgtgttcttgatgcacttttcccttcagtacttggaggaacttgtgccatacctggagcattcggttgtgggaaaacagttatcagtcaagctctttcaaagtactctaattctgacactgtggtttatgttggct	(((((((((((.(((..((((((((.(((.(((((((((((((.(((((....(((((........)))))...(((.((((((((....)))..))))))))(((((((((((..(((((.....((.......)).....)))))..))).))))))))......((((((.....))))))..........))))))))))).))))))).)))....)))).))))..))).))....(((.(((..((.......)).))).)))..))))))))).
novel-m0234-5p	novel-m0234	Unigene0073265	49	230	+	182	-43.6	39.01	0.61	TAGGGTTACCGTATTAGTTGTC	22	5p	tttaggcattTAGGGTTACCGTATTAGTTGTCttgcatccattatgggttttaatcatcctttgacaatcactaagatatctattttcaggtactcggtccactacaacctgtggattatgcagtggttgcctttttgcctgggattagtgaggtgatccatgattttttgctagcttaaag	(((((((..(((((((((((.(((((((........(((((...))))).....(((.....)))((((((((.((.(((((......))))))).(((((((........)))))))....))))))))(((........)))))))))).)))))))).)))..........))))))).
novel-m0235-3p	novel-m0235	Unigene0073268	164	297	+	134	-50.2	46.27	0.81	CCATAGTGCATGGCCGAACCC	21	3p	aggaaccatagggttcggcaatggtgtatggccaaaccccatggaaggaaattgggagatgattatgatagttttaatgaaaagaataaaccatagggtccggCCATAGTGCATGGCCGAACCCcatggaaggt	.....((((.(((((((((.(((...(((((((..((((.((((...(((((((..............)))))))...............)))).))))..)))))))...))).))))))))).)))).....
novel-m0236-3p	novel-m0236	Unigene0073269	293	426	+	134	-50.2	46.27	0.81	CCATAGTGCATGGCCGAACCC	21	3p	aggaaccatagggttcggcaatggtgtatggccaaaccccatggaaggaaattgggagatgattatgatagttttaatgaaaagaataaaccatagggtccggCCATAGTGCATGGCCGAACCCcatggaaggt	.....((((.(((((((((.(((...(((((((..((((.((((...(((((((..............)))))))...............)))).))))..)))))))...))).))))))))).)))).....
novel-m0237-5p	novel-m0237	Unigene0073402	14	310	+	297	-71.2	38.38	0.62	ATTTCCGTTCGATTTTTCTTGTT	23	5p	ttgtgtgtttATTTCCGTTCGATTTTTCTTGTTtccgcgcgtaacgctaacagaacatagttttattctcatcagcgtatagtggcacatttggatgtgcctcagaattgaaagggtgaaatctgttcctccaaaatattcaaactacccataatttggggagattgaatttctccctagtttgaatttgggccatcttattccatctgaaatttcttcttcatttggcagttaacgtctctttaatcacattcatcaggtaagcaaggaagtcgctataaagatgtacggccacat	.(((((((.(((((..((.(((((((.((((((((((((.....))).....(((((..((((((((((..((((........(((((((....)))))))......)))).)))))))))).))))).(((((...(((((((((...........(((((((.......)))))))))))))))))))))..........(((..((((........))))..)))..(((((.......)))))...........)).))))))))))))))..))..))))).)))..)))).
novel-m0238-3p	novel-m0238	Unigene0073503	511	592	+	82	-26.6	45.12	0.72	TGGAGTGACCCAAGTCCTTTATA	23	3p	ataccgtttgttaggacctgggcttccagcccaaaagactaacctcttaggTGGAGTGACCCAAGTCCTTTATAaactctta	.....((((((.(((((.((((((((((.((...((((......)))).))))))).).)))).)))))..)))))).....
novel-m0238-5p	novel-m0238	Unigene0073503	511	592	+	82	-26.6	45.12	0.72	TTAGGACCTGGGCTTCCAGCC	21	5p	ataccgtttgTTAGGACCTGGGCTTCCAGCCcaaaagactaacctcttaggtggagtgacccaagtcctttataaactctta	.....((((((.(((((.((((((((((.((...((((......)))).))))))).).)))).)))))..)))))).....
novel-m0239-5p	novel-m0239	Unigene0073791	45	179	-	135	-24.2	37.04	0.48	TTTGAGATTCTGATTTTTTGT	21	5p	ttatgggtttTTTGAGATTCTGATTTTTTGTggatttttttgaagacagaaaagagagatgcggagaggataggaattggaagaagatagagagatgagatagacgaaggagaagaggagaagaagaatctgatc	......(((((((..((((((.(((((((.((.((((((((...........)))))))).)).))))))).))))))...))))))).....(((.((((..........................)))).)))
novel-m0240-3p	novel-m0240	Unigene0073898	992	1144	+	153	-55.9	42.48	0.86	TGAGTCACTCTCGGATTGGGC	21	3p	ggtcttttgaatttcaactgggttgactcaatgaagttgtgggcgatattgagtcacaatgagtttggaactcattttgaatttcaaaatggccaactcaagctggttggtgtatgactcatTGAGTCACTCTCGGATTGGGCttaagaggcg	.(((((((((..((((((((((.(((((((((((.((((((.(((((.....))).((((.(((((((...(((((((((...))))))))).....))))))).)))))).)))))))))))))))))..))))).))))).))))))))).
novel-m0241-3p	novel-m0241	Unigene0073927	966	1034	+	69	-30	40.58	1.07	ATTGTGAATATCGGCCGATAAC	22	3p	ctccaaccgatatcggccgatattttgatatcgtccgatATTGTGAATATCGGCCGATAACgatatata	.......((.(((((((((((((((.((((((....))))))..))))))))))))))).)).......
novel-m0241-5p	novel-m0241	Unigene0073927	966	1034	+	69	-30	40.58	1.07	TATCGGCCGATATTTTGATAT	21	5p	ctccaaccgaTATCGGCCGATATTTTGATATcgtccgatattgtgaatatcggccgataacgatatata	.......((.(((((((((((((((.((((((....))))))..))))))))))))))).)).......
novel-m0242-5p	novel-m0242	Unigene0073967	810	1110	-	301	-166.5	41.86	1.32	CGGTAACGAACATCCTGTGGA	21	5p	ttcaagatcaCGGTAACGAACATCCTGTGGAacatacctaggcatgtttatcagaaacccgagaaactctatatcaactgcaacgtaattgtgcatctgaatgaccttgaaatctgtgtgaacccctctgcaaaatagaagggattcgcgaggtgtggaaagagaattttgcaaatgagtccagacggatttcaagatcattcagacacacaattatgttgcagttgatacagagttcccgaggtttctaataaacacgcctcggtatgctccataggatgttcgttaccgtaatcttaca	...(((((.((((((((((((((((((((((.((((((.((((.(((((((.(((((((((.(.((((((.((((((((((((((((((((((..(((((((((.((((((((((((.((.((.(...((((((((........(((((.....)))))......))))))))...).)).)).)))))))))))).)))))))))..)))))))))))))))))))))).)))))).))).))))))).))))))).)))).)))))).)))))))))))))))))))))).)))))...
novel-m0243-5p	novel-m0243	Unigene0074033	143	297	-	155	-23.9	38.06	0.41	TAAATGTGAAATTTTGAGGGCCT	23	5p	cagtgttaggTAAATGTGAAATTTTGAGGGCCTtcaaaaacatgacttctcttatccaattaagatgaaattctataagtatcatatacaagccaagacctttcaaacctactaatccatgtggtaccaagggcgcccattagctgtttgcacca	..((.((.(((..((((((.((((..((((..((((.............(((((......))))))))).))))..)))).))))))....))))).))......................((((.(.((.(((........))).)).).))))
novel-m0244-5p	novel-m0244	Unigene0074117	440	643	+	204	-49.8	40.69	0.6	CTGAGGCTCTGAATGAACTTT	21	5p	aagttccacaCTGAGGCTCTGAATGAACTTTtggaatctgatgataaatttggtttcatagtaatggatgggaatggaaccctttttggtactttaagtggaaatacacgtgaattacttcacaaattttctgtagatctaccaaagaaacatggaagaggagggcagtcagctctgcggtttgctcggcttcggatggagaaa	...(((((..((((((((..((.((((((..(((((((.(((.....))).))))))).((((.((((.(((........))).)))).))))....(((......)))(((((....)))))...((((((((...(((.....)))...))))))))(.(((((.....))))).))))))).)))))))))).)))))...
novel-m0245-5p	novel-m0245	Unigene0074399	345	431	-	87	-45.1	51.72	1	TGAGGACGAAGAGGAGGACGA	21	5p	tcccttcttcTGAGGACGAAGAGGAGGACGAgaggtgggctctaccaaccactctcccttcctcttcttcttcttcagatgaagtct	...((((.((((((((.(((((((((((.(.(((((((..........)))).))).).))))))))))).)))))))).))))...
novel-m0246-3p	novel-m0246	Unigene0074400	501	608	-	108	-48	46.3	0.96	ATTACAAGTGCACTAGCCATG	21	3p	ctcagcagccaaccaccccatgaatagtgcacatgtaatctcatccatgctttaatcaaagcacgagATTACAAGTGCACTAGCCATGgcctgattgggtgttttcac	...((((.((((.((..(((((..((((((((.(((((((((.....((((((....)))))).))))))))).))))))))..)))))..)).)))).)))).....
novel-m0246-5p	novel-m0246	Unigene0074400	501	608	-	108	-48	46.3	0.96	TGAATAGTGCACATGTAATCT	21	5p	ctcagcagccaaccaccccaTGAATAGTGCACATGTAATCTcatccatgctttaatcaaagcacgagattacaagtgcactagccatggcctgattgggtgttttcac	...((((.((((.((..(((((..((((((((.(((((((((.....((((((....)))))).))))))))).))))))))..)))))..)).)))).)))).....
novel-m0247-5p	novel-m0247	Unigene0074400	640	726	-	87	-45.1	51.72	1	TGAGGACGAAGAGGAGGACGA	21	5p	tcccttcttcTGAGGACGAAGAGGAGGACGAgaggtgggctctaccaaccactctcccttcctcttcttcttcttcagatgaagtct	...((((.((((((((.(((((((((((.(.(((((((..........)))).))).).))))))))))).)))))))).))))...
novel-m0248-5p	novel-m0248	Unigene0074401	976	1069	-	94	-32.6	43.62	0.8	TGAATAGTGCACATGTAATCT	21	5p	aaccaccccaTGAATAGTGCACATGTAATCTcatccatgctttaatcaaagaacgagattacaagtgcaccagtcatggcctgattgggtgtct	...((((((((((...((((((.(((((((((.......((((....))))...))))))))).))))))...)))))........)))))...
novel-m0249-5p	novel-m0249	Unigene0074401	1111	1196	-	86	-41.9	48.84	1	TGAGGATGAAGAGGAGGATGAG	22	5p	tctcttcttcTGAGGATGAAGAGGAGGATGAGaggtgggctctaccaaccactctcccttcctctcttcttcttcagatgaagtct	...((((.((((((((.((((((.((((.(.(((((((..........)))).))).).)))))))))).)))))))).))))...
novel-m0250-5p	novel-m0250	Unigene0074402	178	269	-	92	-43	43.48	1.07	TGAATAGTGCACATGTAATCT	21	5p	aaccaccccaTGAATAGTGCACATGTAATCTcatccatgctttaatggaagcatgagattgcaagtgcactagtcatggcctgattgggttt	.......((((((.((((((((.(((((((((((((((......)))))....)))))))))).)))))))).))))))(((....)))...
novel-m0251-5p	novel-m0251	Unigene0074402	311	396	-	86	-41.9	48.84	1	TGAGGATGAAGAGGAGGATGAG	22	5p	tctcttcttcTGAGGATGAAGAGGAGGATGAGaggtgggctctaccaaccactctcccttcctctcttcttcttcagatgaagtct	...((((.((((((((.((((((.((((.(.(((((((..........)))).))).).)))))))))).)))))))).))))...
novel-m0252-5p	novel-m0252	Unigene0074601	856	988	+	133	-25.5	42.11	0.46	GACGGGGGAAATGAAAGCAGAAT	23	5p	cagtgctccaGACGGGGGAAATGAAAGCAGAATtagttcggatccctcccacatgttcaatctttttttagcggttttcccagagatctttatcattaacgcaaccttcattttgctcattcatggagttgta	....((((((((.(((.((((((((.(..(..(((((..(((((.((......((((.((......)).))))........)).))))).....)))))..)..).)))))))).)))..)).))))))....
novel-m0253-3p	novel-m0253	Unigene0075083	3981	4337	+	357	-133	42.02	0.89	AATGAGTTCAAATTGGGTTGGAT	23	3p	ccatgaattggatcccattccaatttgaaaccattggatgttagaagccatggttttcaaaggtccaaagatcaacggtgaaattggggtaaatttcaatccaacagtgaggttaactcaaaatgggttcaaattgggttgtgacctaatttatggggtggggggcagatggggatgaagaggtgttagtggggcccaagtgggcctcatttgtgcaaaataaaaatttctcccccatccatgaattgagtcccaaccctaaggtccaaaaatcagtggtgaaaatgggctcaatttggggtgaatttcaatccaagtgacattAATGAGTTCAAATTGGGTTGGATccaatttatg	.((((((((((((((.(.(((((((((((..(((((.(((((((((((....)))))....((((....)))).....(((((((......)))))))(((((....((((.....))))...))))).......((((((.(((.(((((((((((.((((((......((((((.......(((.((((((((((....))))))))))...)))........))))))))))))))))))))))).))).))))))...((((((....(((....)))...))))))...((((((.(((...))).)))))))))))))))))..))))))))))).)))))))))))))))
novel-m0254-3p	novel-m0254	Unigene0075185	779	971	-	193	-41	45.08	0.47	CGAAGTAGCCATGGTGGAAGCA	22	3p	ttggtgtttgggtttcgaccatcgctcttgggtttcaacgtttgctctcgatttttagggtttcaactttcgctcttggtgtttgggtttcaacgttggcgataaatacgaatacgatgtctcgatctactcttttcggcggccaatggaaaaaaaggtcaCGAAGTAGCCATGGTGGAAGCAattctgttgc	...........(((((.(((((.((((((.(...((((((((....(((((.....(((((..........)))))......)))))....)))))))).........((....)).......(((((....((((((........))))))...))))).).))).))).))))).)))))...........
novel-m0255-5p	novel-m0255	Unigene0075537	228	324	+	97	-45.4	59.79	0.78	TTGGGCCGGGCCATGTGGGCC	21	5p	aagaagcgttTTGGGCCGGGCCATGTGGGCCcgggcccaaaagcaaaaccatgctggctcgcctgtgtgcgcaaggcccagagcggacaatttctta	(((((((((((((((((..(((((((((((..(((((....((((......)))))))))))))))))).))..))))))))))).....)))))).
novel-m0256-5p	novel-m0256	Unigene0075615	7	117	+	111	-57.5	45.95	1.13	TCCGAGTACCGACAACTAGTAGC	23	5p	ctctccctccTCCGAGTACCGACAACTAGTAGCcatctggacatataactagatgactttgtacgcataattgagaggctactagttgtcgatactaggaggagggttaga	((..(((((((((.((((.(((((((((((((((((((((........))))))).((((.............)))))))))))))))))).)))).)))))))))..)).
novel-m0257-3p	novel-m0257	Unigene0076793	266	366	-	101	-42	42.57	0.98	TATGGATAGGGTTGTGAGATT	21	3p	attgattgggtgatctgaccatcctatccatatttagcagtggaatgagagggacattgctaacactgaaTATGGATAGGGTTGTGAGATTgtccatccag	.(((..((((((((((.((.(((((((((((((((((...(((((((.......)))).)))...))))))))))))))))).)).))))))))))..)))
novel-m0258-3p	novel-m0258	Unigene0077336	168	267	-	100	-23.6	42	0.56	GCATTGTATCTCTGGAACAA	20	3p	attcataagccttttgagagccataggtgcatatgcagaggggttttctgctgaacccatcattagaagaGCATTGTATCTCTGGAACAAgcttcaagta	......((((...(((....(((.(((((((.((((.((.((((((......)))))).)).........))))))))))).)))..)))))))......
novel-m0259-3p	novel-m0259	Unigene0077339	168	267	-	100	-23.6	42	0.56	GCATTGTATCTCTGGAACAA	20	3p	attcataagccttttgagagccataggtgcatatgcagaggggttttctgctgaacccatcattagaagaGCATTGTATCTCTGGAACAAgcttcaagta	......((((...(((....(((.(((((((.((((.((.((((((......)))))).)).........))))))))))).)))..)))))))......
novel-m0260-3p	novel-m0260	Unigene0077340	168	267	-	100	-23.6	42	0.56	GCATTGTATCTCTGGAACAA	20	3p	attcataagccttttgagagccataggtgcatatgcagaggggttttctgctgaacccatcattagaagaGCATTGTATCTCTGGAACAAgcttcaagta	......((((...(((....(((.(((((((.((((.((.((((((......)))))).)).........))))))))))).)))..)))))))......
novel-m0261-5p	novel-m0261	Unigene0077538	2179	2486	+	308	-80.1	47.08	0.55	TGCGGGAGAGACAGGAGACCT	21	5p	tacctcataaTGCGGGAGAGACAGGAGACCTatatcctcgacaacggtttgcaagagacccagcaaatacaagttctgctgcctctggtttgtggatgaggcagaggtgcatgttttaccactcctttttattttctcagttctaaaaggtcacaatgtccatcatgtcgttgacattagtgtgcgcttcatccagctaaaagtggcaacacatatgagcttcaaatgcatctccagtgtggatcctatcaaatcaccaatgtcgtttcggctctttccctgcctgtcctgctttggccgtggagggg	..((((.....((((((.((.(((((((((........(((((..((((((..((.((.(((((((((....))).)))((((.((......((((((((((((.((((.......)))).))((((((...............)))))).(((((((((.((......)).)))))).)))...))))))))))......)).)))).(((....((((.......)).))....)))))).))))..)))))).....)))))....)).)))...)))).)).))))))..........))))..
novel-m0262-3p	novel-m0262	Unigene0077581	253	498	-	246	-86	57.72	0.61	TTCTGCGACCGGTCCTGCACT	21	3p	cgcctctcccacggccccggccccagtttgaaggagagccgtgctggtgagcaccggtagtagaagtattgttagggttgcgggcagagccaggcccctgaaaattacggggatcgtcatgaaaggagtggtgggaacgctttggcggcaattctgcgtgtagataaggacatggataccgattgcaccttccggcctgccaatgaaaacagactTTCTGCGACCGGTCCTGCACTggtctgaggc	.(((((...(((((((((..(........)..)).).))))))((((((((.((((((.((((((((.(((((...(((...(((((.(((.((.(((((.......)))))..(((((......(((((.......))))))))))((((((.(.(((((........))))).)....)))))).....)))))))))))))...))))))).)))))).)))))).)).))))))...)))))
novel-m0263-5p	novel-m0263	Unigene0077901	1387	1590	+	204	-58.5	43.63	0.66	CGAAGAAGGCCGTCTGGACGA	21	5p	atgggctgtgCGAAGAAGGCCGTCTGGACGAtgctatagtgcttcatctgaagatggttgagacaggtaacatcggtaatttggtaacttacaacatgatgattaacggatgttttaagagtcataaggttgataaggctatgcaggtccaccaacagatgctcaatatggggttcaagccagatgctttcacgtatggcataa	....((((((((..((((((.((((((..(((.(((((.((...((((((....((((.(.(((..(((............((((..(((((((((((((..((((........))))..)))))...)))).)))))))))))..)))))))).))))))..)).))))).)))....)))))))))))).))))))))....
novel-m0264-3p	novel-m0264	Unigene0078005	649	922	-	274	-74.6	37.59	0.72	TCATAGAGGCACTTGTTGATGAA	23	3p	ccaaacctttcatcaaccaacgtccctatgactaagtatatggtttttcatggactctattcaaattcaaacctttcaatcaacttatgcccctgtgaattagtatgatgtccttcctcagacactgttagattgatcaccagtgaaattatgatagttctatacaagaatgccctcacatctgatgaatccaatgtgcagtccacaatcaactggaatccaatgaaagatcatatatcaatTCATAGAGGCACTTGTTGATGAAaggttcgga	((.((((((((((((((....(((.((((((....(((((((((((((((((((..(((((....((((......(((((((((((((((............))))))((((........))))..))).)))))).......)))).....)))))((((.....))))....(((((((..((....))..))))).))((((........)))).))).))))))))))))))))....)))))).)))....)))))))))))))).)).
novel-m0264-5p	novel-m0264	Unigene0078005	649	922	-	274	-74.6	37.59	0.72	CATCAACCAACGTCCCTATGACT	23	5p	ccaaacctttCATCAACCAACGTCCCTATGACTaagtatatggtttttcatggactctattcaaattcaaacctttcaatcaacttatgcccctgtgaattagtatgatgtccttcctcagacactgttagattgatcaccagtgaaattatgatagttctatacaagaatgccctcacatctgatgaatccaatgtgcagtccacaatcaactggaatccaatgaaagatcatatatcaattcatagaggcacttgttgatgaaaggttcgga	((.((((((((((((((....(((.((((((....(((((((((((((((((((..(((((....((((......(((((((((((((((............))))))((((........))))..))).)))))).......)))).....)))))((((.....))))....(((((((..((....))..))))).))((((........)))).))).))))))))))))))))....)))))).)))....)))))))))))))).)).
novel-m0265-3p	novel-m0265	Unigene0078038	592	788	+	197	-48.5	44.16	0.56	TCCTTGGATGAGAACAATGCT	21	3p	ctcagaaaggaggcggagtatctgctccaattgggagatctcaaggggtttaggaaggcaggaaatgtacatgtggagcctcatagggcagttccaattttcccatggaccgacgacattatgatcctttatcaacatagcttgcgtagcattggaaatgagaatgTCCTTGGATGAGAACAATGCTattttctatt	...((((((..((((..((.(((..((((...((((.((((((...((((((((((((..((((.(((...(((((....)))))..))).))))..))))))..))))))..........((((.....)))).((..(((.....)))..))....)))).)).))))))))..)))))..)))).))))))...
novel-m0266-3p	novel-m0266	Unigene0078316	119	232	-	114	-25.3	41.23	0.54	TTTAATCAGATCGGACCGAGA	21	3p	cacggctcacggctcacggttggtttaaaaaaccgatttaaatcgcgactttaaacggttttttacggcttaaattatggtttTTTAATCAGATCGGACCGAGAagatgacggt	(((..(((..((.((.(((((...(((((((((((((((((.(((.((((......)))).....))).)))))))..))))))))))...))))))))))))..).)).....
novel-m0267-5p	novel-m0267	Unigene0078468	103	225	-	123	-52.4	43.9	0.97	CCATGGTATATGGCCGAACCC	21	5p	tagggttcggCCATGGTATATGGCCGAACCCcatggagttgattattaatttagaaaataaatggaaagggttagatttgtttctatgggtgaggttcggccatggtgtattgccgaacccca	..(((((((((.(((...((((((((((((((((((((((((((....(((((.....)))))......))))))......))))))))....))))))))))))...))).)))))))))..
novel-m0268-3p	novel-m0268	Unigene0078636	776	874	-	99	-43.5	65.66	0.67	TCTCTGCGGCTGGCACTCGAG	21	3p	aacgcggagcccgagcggccggcgagcgagtggttagtggccaatagcgccctagttgatggcattccTCTCTGCGGCTGGCACTCGAGgaaccacggg	..((.((..((((((..((((((..(((((.((......((((.((((......)))).))))...)).))).)).)))))).)))).))..)).))..
novel-m0269-3p	novel-m0269	Unigene0078745	486	571	-	86	-19.8	53.49	0.43	TCCTTGTGGCTGGCCAGATCC	21	3p	tctcctacctgtttctgcccgagttgcaaacgaacccttgccttgttgcaggacaTCCTTGTGGCTGGCCAGATCCaacatctcct	.........((..((((.((.((((((((..((...(((((......)))))...)).)))))))))).))))..)).........
novel-m0270-5p	novel-m0270	Unigene0078779	6621	6726	+	106	-56	40.57	1.3	TAGGGAACCCTTGATCAGCATG	22	5p	gttgccaacaTAGGGAACCCTTGATCAGCATGctgtttacttggtacatctcaattaggtttacatgtaaacagcatgctgatcataagtttcctattttggcgct	..((((((.(((((((((...(((((((((((((((((((...(((.((((.....)))).)))..)))))))))))))))))))...))))))))).))))))..
novel-m0271-3p	novel-m0271	Unigene0079610	1396	1496	+	101	-27.2	43.56	0.62	CTTTTTCGTCAAGGTGGAGTT	21	3p	aggatctgaagatgctacacggcaggtggagatgtcataatctgagggcaacaatcttcatggtgtcaggCTTTTTCGTCAAGGTGGAGTTtttagattta	..(((((((((((.((((.(....((((((((.(((...(((((((((......)))))).)))....))).))))))))..))))).)))))))))))..
novel-m0272-5p	novel-m0272	Unigene0079766	1795	1904	-	110	-20.6	36.36	0.51	CGTCGAATGACTATTCATTTATT	23	5p	aatgatttttCGTCGAATGACTATTCATTTATTgtagtttcaaatagggggcaggaaggttctatgggaaaatggtggttcaattcgatgttgtttaacgaggagttaga	..........((((((((((((((.(((((.........((..((((((..........))))))..)))))))))))))..))))))))...((((((.....))))))
novel-m0273-5p	novel-m0273	Unigene0079768	2291	2496	+	206	-41.8	36.89	0.55	CTCGGGATACTCTTTTATCATT	22	5p	gtatctgtgtCTCGGGATACTCTTTTATCATTtcgtccaacaggaatagttgttctaattctatgaatctttccagaacgttcttctcttgaatatcattcaaaaaagtttttgattgcccggtattccaccaattagtaacccaaggttccagacttttagtaaatgagagagagatccaccagggcaaaaaaactatagatgca	((((((((((((..((((.(((((((.((((((.......(((((..((.((((((..................))))))..))..))))).....((.((((((....)))))).))...(((.....)))........((..((((((...))))))..)))))))))))))))))))....))))).........))))))).
novel-m0274-5p	novel-m0274	Unigene0079936	43	157	-	115	-53.5	53.91	0.86	TCCGAGACAAGTTCCGAAGGCT	22	5p	tctcggaaccTCCGAGACAAGTTCCGAAGGCTcggacaatccgaaggaacaaatgatgttccaaggaccctcggaaggtatgaagtctcggaacctggcttggtcgttccgagac	(((((((((..(((((.((.(((((((.((((((.((..(((((.((((((.....))))))........)))))..)).)).))))))))))).)).)))))..))))))))).
novel-m0275-3p	novel-m0275	Unigene0080130	2060	2191	-	132	-22.5	34.09	0.5	CATCACCAATGCGAATGGCAT	21	3p	tagggttttgcaagcggagctattctatggtagaatgaaagagaaaaaaaattcaaacaattgagaatcaaagtcaaattttttctggaatttagattatcCATCACCAATGCGAATGGCATtgtcttccct	.((((......((((((.(((((((((((((.((..((.............(((((....)))))......(((((((((((....))))))).)))).))..))))).))).))))))).))).)))))))
novel-m0276-5p	novel-m0276	Unigene0080312	191	256	-	66	-27.1	45.45	0.9	ACATTCTTGAGGTAGAACTCACT	23	5p	ACATTCTTGAGGTAGAACTCACTctcaaaacctagccgttgagaggaggatgcctcaagtgttgta	(((..(((((((((...(((.(((((((..........))))))))))..)))))))))...))).
novel-m0277-3p	novel-m0277	Unigene0080431	644	730	-	87	-38.3	57.47	0.77	CTGCAACGGAGAGAGGGTCGTGG	23	3p	gtaggagaagaccctcttctctctccctgaggcagacatggcgtcgtcgtcgctCTGCAACGGAGAGAGGGTCGTGGttttcctcta	.((((.(((((((..(..(((((((.(((..(((((..(((((....))))).)))))..))).)))))))..).))))))).))))
novel-m0278-5p	novel-m0278	Unigene0080439	50	332	-	283	-63.8	38.16	0.59	CCATCCAAGGTGGCCGAACCC	21	5p	tggggttcggCCATCCAAGGTGGCCGAACCCtatgtccatgttttggtcctctttagcatgttttaagtgtcacttacacatataaaaatcagtacaatgttactatgattttacccttcaaaaccatccaaataagttcatcaacttgtccaaatgaccataatacttcatgggattcggctatctttaagttcatcaacttgtccaaatgaccataatacttcatgggattcggccatctttggtccatttcatcaattttaatccactgtttagacccat	..(((((.(((((...((((((((((((.((((((....((((.(((((.........((((..(((((...))))).))))...((((((((((......)))..)))))))...................(((((((....)))))))((.(((..((((........)))).))).)).......((((((....)))))).......))))).))))...)))))).)))))))))))))))))..............(((........))))))))..
novel-m0279-5p	novel-m0279	Unigene0080454	980	1251	+	272	-77.5	35.66	0.8	CCCCATTGGATGGCCGAACCC	21	5p	tagggttcggCCCCATTGGATGGCCGAACCCcatggaaataattgatttatttggatgtttttggaagtttaaaccatacaaatatgggactgtttttagatgataaaagtggattaagtttgatgtttttaaaggacaaaaatcatgtcaaaacatggtaaattttatatatgtcaaatgggtcattttgtggccaaaaatcagtaagtaggataagaagatttacatcaaggaaaccttggggttcggccatgtgtatgacctaacccca	..(((((.((...(((((.((((((((((((((.((......(((((((((((..((...((((((((......(((((....))))).....))))))))..))..)))))))))))(((((((((...(((((.......(((((((....)))))))...)))))...))))))))).((((((...))))))........((((((...........))))))..........)).)))))))))))))).)).))).)).)))))..
novel-m0280-3p	novel-m0280	Unigene0080492	71	435	-	365	-64.6	32.05	0.55	ATTTTGATACAAGGAGGCACT	21	3p	cctagattcaagtttctctccctgcattcaaatttcacaatatttccaaaaaatgttaattattgtttggtgacattggtagcttatatcctaattccaatgtagagataaaaaatggcattgagtgttttacatagattaatgattgcaatatctgggagggccacaccacctatgctagttatgttgaaaaacttctcggacacacaatgagattgttacttctaatcaatgtaaaagtaattttttattaagaaggagttctattaacaaaagaaaactcatataaacctaaagctggagacatattcctaaccaaatgtaggcactctaaATTTTGATACAAGGAGGCACTtgcttttttt	........(((((...(((((.((.(((.((((((................(((((((.((.((((((....((((((((((........)))...)))))))..)))))).)).)))))))(((((((((((((.((((((((((((((.....((((.((......)).))))))).)))))).......(((.(((((.........)))))..))).....))))).))))))))((((....)))).......(((((((.........)))..)))).......((((....(((((........))..)))....))))))))).)))))).))).)).))))).)))))........
novel-m0281-3p	novel-m0281	Unigene0080494	71	435	-	365	-64.6	32.05	0.55	ATTTTGATACAAGGAGGCACT	21	3p	cctagattcaagtttctctccctgcattcaaatttcacaatatttccaaaaaatgttaattattgtttggtgacattggtagcttatatcctaattccaatgtagagataaaaaatggcattgagtgttttacatagattaatgattgcaatatctgggagggccacaccacctatgctagttatgttgaaaaacttctcggacacacaatgagattgttacttctaatcaatgtaaaagtaattttttattaagaaggagttctattaacaaaagaaaactcatataaacctaaagctggagacatattcctaaccaaatgtaggcactctaaATTTTGATACAAGGAGGCACTtgcttttttt	........(((((...(((((.((.(((.((((((................(((((((.((.((((((....((((((((((........)))...)))))))..)))))).)).)))))))(((((((((((((.((((((((((((((.....((((.((......)).))))))).)))))).......(((.(((((.........)))))..))).....))))).))))))))((((....)))).......(((((((.........)))..)))).......((((....(((((........))..)))....))))))))).)))))).))).)).))))).)))))........
novel-m0282-5p	novel-m0282	Unigene0080747	224	289	+	66	-19.7	53.03	0.56	GAGAATGGAGGCTGTAAGTGT	21	5p	tgctggttctGAGAATGGAGGCTGTAAGTGTggatcaagctgcagctgcgatccttgcacctgcaa	(((.(((.(.(((.((.(.(((((((.((.((...)).))))))))).).)).)))).))).))).
novel-m0283-5p	novel-m0283	Unigene0080754	365	472	-	108	-24.2	45.37	0.49	TGGACGTAGGCCAAGGTTGGG	21	5p	gatctacacgTGGACGTAGGCCAAGGTTGGGccaaaccacgtatatctcgtgtgttgtttctctttgtgtgattgaatctgtgttttgtttatgtgggtgttgggtct	((((((((((((((((.((((..(((((.((.(((((((((.......)))).))).............)).)).)))))..)))))))))))))).....)))))).
novel-m0284-5p	novel-m0284	Unigene0080756	365	472	-	108	-24.2	45.37	0.49	TGGACGTAGGCCAAGGTTGGG	21	5p	gatctacacgTGGACGTAGGCCAAGGTTGGGccaaaccacgtatatctcgtgtgttgtttctctttgtgtgattgaatctgtgttttgtttatgtgggtgttgggtct	((((((((((((((((.((((..(((((.((.(((((((((.......)))).))).............)).)).)))))..)))))))))))))).....)))))).
novel-m0285-3p	novel-m0285	Unigene0080980	113	207	+	95	-42.8	43.16	1.04	TCCGTGTCGGATACGCACCCG	21	3p	cgtatccgtatttaaaaaatattttaattaattgggtgcgtatttgacacgtatccgagccgtaTCCGTGTCGGATACGCACCCGacacggatac	.((((((((..((((((....))))))....((((((((((((((((((((.((.((...)).)).)))))))))))))))))))).))))))))
novel-m0286-5p	novel-m0286	Unigene0081278	192	264	+	73	-33.4	47.95	0.95	CCTAGTGGTTGAGACACAAGACT	23	5p	aaggggttggCCTAGTGGTTGAGACACAAGACTtcaagattgaggtcttgggttcaatccttggtgactccaa	..(((((..(((.((.((((((..(.((((((((((....)))))))))))..)))))))).))).)))))..
novel-m0287-5p	novel-m0287	Unigene0081280	943	1064	+	122	-32	42.62	0.62	CCTAGTGGTTGAGACACAAGACT	23	5p	aaggggttggCCTAGTGGTTGAGACACAAGACTtcaggattaaagtcttaggttcaatcttcggtaactctaatgaaggactactgtttgtgggatatgtacaaagtaaggtccactgcttg	..(((((((.((....(((((((.(..(((((((........)))))))..))))))))...)))))))))......(((((....((((((.......))))))....)))))........
novel-m0288-5p	novel-m0288	Unigene0081284	664	736	+	73	-33.4	47.95	0.95	CCTAGTGGTTGAGACACAAGACT	23	5p	aaggggttggCCTAGTGGTTGAGACACAAGACTtcaagattgaggtcttgggttcaatccttggtgactccaa	..(((((..(((.((.((((((..(.((((((((((....)))))))))))..)))))))).))).)))))..
novel-m0289-5p	novel-m0289	Unigene0081285	449	521	+	73	-34.1	47.95	0.97	CCTAGTGGTTGAGACACAAGACT	23	5p	aaggggttggCCTAGTGGTTGAGACACAAGACTtcaggattgaggtcttgggttcaatccttggtaactccat	..(((((((.((.((.((((((..(.((((((((((....)))))))))))..)))))))).)))))))))..
novel-m0290-3p	novel-m0290	Unigene0081300	248	317	+	70	-30.6	34.29	1.27	TATATACACACCATTTGAGCATG	23	3p	taatccaagcacatgttcaatgtgtatatttccgtcaTATATACACACCATTTGAGCATGtgattggatt	.(((((((.((((((((((((((((((((.........)))))))))....))))))))))).)))))))
novel-m0291-3p	novel-m0291	Unigene0081300	231	336	-	106	-48.5	30.19	1.52	ATGTGCTTGGATTAATTGAAG	21	3p	atctattttcacttcaattaatccaatcacatgctcaaatggtgtgtatatatgacggaaatatacacattgaacATGTGCTTGGATTAATTGAAGttgaaataga	.((((((((.((((((((((((((((.((((((.(((....((((((((((.........))))))))))))).)))))).)))))))))))))))).))))))))
novel-m0292-5p	novel-m0292	Unigene0081309	113	340	-	228	-52	39.47	0.58	CCATATACCATGGCCGAACCC	21	5p	tagggttcgaCCATATACCATGGCCGAACCCatggttcaaggctcattccctccatgcatttcaaaaccataaaactccattgcatttttatcataaactcattttaaaaccttactcccatgctttcattaaaaccctaaattcattaatcaaaaaccctaaccaattaaaccaaccaccaaatcatccaccatggggttcggccatactaaatggccgaaccctat	(((((((((.((((.((..(((((((((((((((((...(((.......)))..(((((......................)))))........................................................................................................))))).))))))))))))..)).)))).))))))))).
novel-m0293-3p	novel-m0293	Unigene0081726	1559	1702	+	144	-29.1	43.75	0.46	AATTGGCCTCTTCATCAACTTGA	23	3p	ctggttgccaaaggcttcactcaggttgaaggtctggactatcatgatacttttgctcctgttgctaagcttgtaaccgttcgtgcgttgctttctattgcttcagtcaagAATTGGCCTCTTCATCAACTTGAtgtcaacaat	...(..(((...)))..)(((((((((((.((...((.(((((.(((...........(((..((..((...(((((.((....)))))))...))...))..)))))).))..)))))...)).))))))))).)).......
novel-m0294-3p	novel-m0294	Unigene0081825	1239	1596	+	358	-87.6	38.27	0.64	TTGAAAATATGGCCGTTGGAA	21	3p	ctgagctttgaatgctccaatgatttgcctatcaatgcttggaatgagagagagagagattttctatagctttgattgattttcctatgaggacaatctatccctaaaagttctctcaaatatgcactcaagagtgagcctaagatgcttaaaattttcctatgaaagctttgagtgtgagttagagatagtttaagagctaatgggtttaacttggatgaattgggctcttaagattgtctggaatgcttgatgatgattggagaaggttttgctcaaggggaatcaaccactgaaaggatctaaggtcatgtacttaaagccctcTTGAAAATATGGCCGTTGGAAatcgaattcg	..((((.......))))....((((((...(((((.((((((((.................))))).))).)))))((((((((((.((((.(.(((((.(((......((((.(((..............))).)))).....(((((((((.(((((....))))).)))))))))((((...(((((((((((((((((((..(((((...)))))..))).))))))).))))))))).....))))..........)))..))))).).)))))))))))))).((.......)).(((((((((((((..((((.......))))..)))))))).)))))...))))))..
novel-m0295-3p	novel-m0295	Unigene0082087	1764	1937	+	174	-62.9	47.13	0.77	CTTTACCCCTCTTTGCACCTA	21	3p	taaggctgcgtttggatgggggtaagggtgtaacccccccattatccttgtttggtaatggaggagtgagggtaaaaaattccaccccctccctttttaaaaaccccttgaagcatgggggttttcagaaaactcttgcacctCTTTACCCCTCTTTGCACCTAtggagcaaaa	..(((.((((...(((.((((..((((((((((.....((((((.((......)))))))).((((.(.((((..........))))))))).(((((.(((((((((........))))))))).)))))....))))))).)))..))))))).)))))))...........
novel-m0296-5p	novel-m0296	Unigene0082139	1213	1470	-	258	-53.9	29.46	0.71	TAGGCACTCGATCTTAATGTTC	22	5p	aaaccaatttTAGGCACTCGATCTTAATGTTCaaaatcaccaggcgtcatcttttcaaggacgtttgtgaactttgactattgacatcaagtgactagaaattgaatttatgattgaaattttaactaatgatagatatttaagtatactttcaatctgtacggttgtatttttaatttacataacaatttttttttaaaaaaaattaccagacgcaaaataaatgggctttaatcggatgggcttgggatttggtaa	....(((((((.((((((.(((.((((((.(((((.((((.(((((((...........)))))))))))..))))).)))))).))).)))).)).)))))))...((((((((((((...(((((....((((((....(((....)))...))))))..)))))...)))))))...)))))..((((((((...))))))))((((((((.((.........(((((.........))))))).).))))))).
novel-m0297-5p	novel-m0297	Unigene0082506	449	641	-	193	-66.6	43.01	0.8	CCATGTACCATGGCCGAACCC	21	5p	tagggttcggCCATGTACCATGGCCGAACCCatggttcatgattcatcattcattgctccataatacctatattcacccaaaatattaaatccacccatcttcccatttttcatggctttttaaaccctaaaaccctagctaatttcacacataacaacctagggttcggccatggaccatggccgaacccat	..(((((((((((((..((((((((((((((..((((.((((........))))...........................................................((((((((((.....)))))....)))))..............))))..))))))))))))))..)))))))))))))..
novel-m0298-5p	novel-m0298	Unigene0082836	263	368	-	106	-46.5	63.21	0.69	AGTCCCGGCCGTCGTGCATGA	21	5p	aagagatgcgAGTCCCGGCCGTCGTGCATGAggtgggcgggcatggtgatcttcttgcgcatcatgtcctcgatggccagcatggcgccggaggggtccacctcta	.((((.((.((.(((((((.(((((((..(..((.((.((((((((((..(.....)..)))))))))))).))..)..)))))))))))..))).)))).)))).
novel-m0299-5p	novel-m0299	Unigene0082853	381	451	+	71	-18	53.52	0.47	TGGGACTTGTTCGCTGGCCAACA	23	5p	acaaccgatgTGGGACTTGTTCGCTGGCCAACAatggatggggtaaagttgaggagacccacccaccaact	.........(((((.(((.((.(((.(((..((.....)).)))..))).)).))).))))).........
novel-m0300-5p	novel-m0300	Unigene0082874	22	95	-	74	-28.3	58.11	0.66	TGGATTGTAACACCCCACCCA	21	5p	gacagagtcgTGGATTGTAACACCCCACCCAgcggcagctgggcatgtggggagttatatgtgaggagagccca	.......((.(.(..((((((.(((((((((((....))))))....))))).))))))..).).)).......
novel-m0301-5p	novel-m0301	Unigene0082951	280	346	+	67	-26	56.72	0.68	TTTTGGTTAGGGCTTCGAGGA	21	5p	gatctcgaagTTTTGGTTAGGGCTTCGAGGAaagcccaagcgaggcccaatccgagccgtgagctca	((.((((..((((.((((.((((((((.((.....))...)))))))))))).))))..)))).)).
novel-m0302-3p	novel-m0302	Unigene0082965	1112	1182	+	71	-36.4	61.97	0.83	TGCACTCCGACTCTGGCTAGT	21	3p	actacaaggactggcagatcggggtgggccgacggttccgTGCACTCCGACTCTGGCTAGTcctgaagagc	.((...((((((((((((((((((((.((.((....)).)).)))))))).))).)))))))))....)).
novel-m0303-5p	novel-m0303	Unigene0083116	193	287	+	95	-36.7	28.42	1.36	TAATAGTACAACTTGAACTCC	21	5p	ctcaatattgTAATAGTACAACTTGAACTCCtaaatataaatgctctaaatgttttggagttcaaattgtactattataataatgtgtgttgggg	(((((((((((((((((((((.(((((((((.((((((...........)))))).))))))))).))))))))))))).......)))))))).
novel-m0304-5p	novel-m0304	Unigene0083424	672	810	-	139	-52	43.88	0.85	CCATGTGTATGGCCGAACCCC	21	5p	tgaggttcggCCATGTGTATGGCCGAACCCCactattggtaattgtgggacataatggttagtttatatggagatatggaaggtttaagaataatcaaattaagtggtgaggttcagccgtgtgtatggccgaacccca	...((((((((((((((((((((.(((((.(((((((..(((((.(((..............(((((((....)))))))..............))))))))))))))).))))).))))))))))))))))))))...
novel-m0305-5p	novel-m0305	Unigene0083430	390	528	-	139	-52	43.88	0.85	CCATGTGTATGGCCGAACCCC	21	5p	tgaggttcggCCATGTGTATGGCCGAACCCCactattggtaattgtgggacataatggttagtttatatggagatatggaaggtttaagaataatcaaattaagtggtgaggttcagccgtgtgtatggccgaacccca	...((((((((((((((((((((.(((((.(((((((..(((((.(((..............(((((((....)))))))..............))))))))))))))).))))).))))))))))))))))))))...
novel-m0306-3p	novel-m0306	Unigene0083543	1251	1373	-	123	-30.4	43.09	0.57	TTTAATCAGATCGGACCGAGA	21	3p	agccgtggctcacggctcacgactgaattaaaaaaaccgatttaaaccgcagcttgaaacggttttttgcagcttaatttatcagaaggtttTTTAATCAGATCGGACCGAGAagatggcggt	.(((((.((((.(((.((.(((((((.((((((((.((....((((....((((..(((......)))..))))...))))......)))))))))))))).)))))))).).)).).)))))
novel-m0307-3p	novel-m0307	Unigene0083545	234	360	-	127	-50.3	49.61	0.8	CGGTCCGGTTCTGATAACACT	21	3p	cttaatttatcagaaggttttttaatcagatcggaccgagaagatggcggttgaggtcgaacctgcagcccaaccgcggtccggtcCGGTCCGGTTCTGATAACACTgataagaactatccactacc	.....((((((((...(((.....((((((((((((((.((.(((.(((((((.(((.(......).)))))))))).)))...)))))))))).))))))))).))))))))..............
novel-m0307-5p	novel-m0307	Unigene0083545	234	360	-	127	-50.3	49.61	0.8	TTTAATCAGATCGGACCGAGA	21	5p	cttaatttatcagaaggtttTTTAATCAGATCGGACCGAGAagatggcggttgaggtcgaacctgcagcccaaccgcggtccggtccggtccggttctgataacactgataagaactatccactacc	.....((((((((...(((.....((((((((((((((.((.(((.(((((((.(((.(......).)))))))))).)))...)))))))))).))))))))).))))))))..............
novel-m0308-5p	novel-m0308	Unigene0083576	184	248	+	65	-18.6	40	0.72	ATGGGCATCCAAACAACAACGTT	23	5p	attggttgagATGGGCATCCAAACAACAACGTTgtgtatgtggtgtttggcccatatatactatt	..((((....((((((...((((((.(.((((.....)))).)))))))))))))....))))..
novel-m0309-3p	novel-m0309	Unigene0083674	2091	2212	-	122	-38	31.97	0.97	TTTTCCATGAAAGCTCTTTCC	21	3p	gatgcatgaacagggagctacatggaaaataaatgcttcttaatggaaaaatgttaaaacccatttctactttctgttaaaagttgttttaTTTTCCATGAAAGCTCTTTCCtttttgcatg	.(((((.(((.((((((((.(((((((((((((.((((.((((((((((((((........)))).....))))))))))))))...)))))))))))))..))))))))..))).))))).
novel-m0310-3p	novel-m0310	Unigene0084430	348	503	+	156	-29.9	38.46	0.5	TCGGTTGTGGATTCTTGCACC	21	3p	gccaatgactatgcatgattccatattgaatcaattccataccagttcaaaattagaggaatgttatggtaaaacttcgtttgaaacgatgtggtagaaagcaacgtgcgacttgaaggacattaTCGGTTGTGGATTCTTGCACCcaccatttta	...((((....((((.((.((((((((((.......(((((.((.(((.........))).)).))))).....(((((.(((..(((.(((........))).))).)))..))))).......)))).)))))).)).)))).....))))...
novel-m0311-3p	novel-m0311	Unigene0084588	414	542	+	129	-51.1	34.11	1.16	TGATAAGTGGTACATCGGTAG	21	3p	acattttatttttactggtgtattgctcatcaagtaacggtgtacctttaatacgccactctacatgtatatgttctatatattggtacatcggtattTGATAAGTGGTACATCGGTAGggataaaatg	.((((((((((((((((((((((((((.((((((((.(((((((((..(((((((..........)))))..........))..))))))))).)))))))).))))))))))))))))))))))))))
novel-m0312-5p	novel-m0312	Unigene0084768	107	241	+	135	-33.3	47.41	0.52	CGACCCGAGTTGCAGCCCTAG	21	5p	ctggcccgccCGACCCGAGTTGCAGCCCTAGaaatcattattgctatcatcatcataaccatttatcgcacttatttggggtcggcacttgcaattgggtttggcaaattatttcgataagccaactggccatgg	.(((((.((((((..(((((.((.((((((((......((.(((.......................)))..))))))))))..)))))))...))))))(((((..(((.....)))..)))))..)))))...
novel-m0313-3p	novel-m0313	Unigene0084770	31	150	+	120	-54.1	52.5	0.86	CGACCCGAGTTGCAGCCCTAGT	22	3p	aatcgggtttttgattcgggtcgggtcgggttgggttcaatgtagtgtgagtcgggttagggttgggtttattaaaacccggcccgccCGACCCGAGTTGCAGCCCTAGTtatttacgat	....(((((..((((((((((((((.(((((((((((.((((.(((.(((.((......)).))).)))))))..))))))))))))))))))))))))).)))))..............
novel-m0314-3p	novel-m0314	Unigene0085083	559	663	-	105	-42.8	42.86	0.95	TCCGTGTCGGATATGCACCCG	21	3p	cgtatccgcatttaaaaaatattttaattaattgggtgcgtattcgacacgtatccgagttgtatctggccgtaTCCGTGTCGGATATGCACCCGacatggatac	.(((((((...((((((....))))))....((((((((((((((((((((.((.((.(((......))))).)).))))))))))))))))))))..)))))))
novel-m0315-5p	novel-m0315	Unigene0085800	1505	1663	+	159	-51.4	37.11	0.87	CCACTTTGGATGGCCGAACCC	21	5p	tagggttcggCCACTTTGGATGGCCGAACCCcatgaaaatgatttgataattgtattgtttttgagggataaaaaccatacaatgatttaaggttttaaggtgtttaatatgaagatatgatggacagtttgggttggccattggatggctgaatcata	...((((((((((..((.(((((((.((((((((....))).(((((..(((((((.(((((((.....))))))).)))))))...))))).....(((.((((((((((....))))..)))))).))))))))))))))).))))))))))))...
novel-m0316-3p	novel-m0316	Unigene0086503	1487	1596	-	110	-34.3	44.55	0.7	TTTAATCAGATCGGACCGAGA	21	3p	aaccgtggctcacggctcacgactggattaaaaaaaccgatttaagcggttttttgcggcttaatttatcagaaggtttTTTAATCAGATCGGACCGAGAcgatggcggt	.(((((.((((.(((.((.((((((.(((((((((.(((((((((((.((.....)).))))))...)))....)))))))))))))).)))))))).)).).).)))))
novel-m0317-3p	novel-m0317	Unigene0086506	672	921	+	250	-69.1	41.6	0.66	TGTTATCAGAACCGGACCGAA	21	3p	atcgccaaggttttggttttggttttgatgatgagacaacaactaatggttttcaaaagattataataagatgcctaaagatttagttagtgctagattctcctctttgagatccggagcctccaatatcaactgcagaattattagaaatctctctgccggagaagtacggcggaagactgtaccagagagagcaaccgagattttagttttagaaagTGTTATCAGAACCGGACCGAAgcccggtcgg	.(((((..(((((((((((.(((((((((((((.......((((((((((((((...(((((.((((((..(((.....((((((((....))))))))(((((((...)))...))))...............)))...))))))..))))).(((((((........)))))))...(((...)))...))).))))).....))))))........)))))))))))))))))))))))).)).)))
novel-m0318-5p	novel-m0318	Unigene0086660	765	869	-	105	-24.3	45.71	0.51	CTATTCCGGACTCAAGAACCC	21	5p	gattcttagaCTATTCCGGACTCAAGAACCCaagtgcaaattcgccaccagctgagatagcgttttactgcgacagagtttttggccggaaattgttggtgaaac	..(((...(((..((((((.(.(((((((.(...((((((..(((..............)))..))..))))...).))))))))))))))...)))...)))..
novel-m0319-5p	novel-m0319	Unigene0086930	1	57	+	57	-24.2	47.37	0.9	CCTAGTGGTTGAGACACAAGACT	23	5p	gCCTAGTGGTTGAGACACAAGACTtcagggttgaggtcttgagttcaatccctagta	..((((.(((((((.(.((((((((((....)))))))))).)))))))).))))..
novel-m0320-5p	novel-m0320	Unigene0087264	68	203	-	136	-29.5	47.79	0.45	ATGCGCATAGGCTACGGCTCC	21	5p	gaatcacaccATGCGCATAGGCTACGGCTCCaagcgtttccattttcattccatcgtattcttcctctgctctagggttaagaccccttttaaaacaaaacggtgaagttgggcctagctgctgggtctttgaagc	...(((.(((..((((.((((((.(((((.((..(((((................(((.........)))....((((....))))...........))))).)).))))))))))))).))..)))...)))...
novel-m0321-3p	novel-m0321	Unigene0087625	1	140	+	140	-49.3	49.29	0.71	AGCTGTAATGACCACTCTCTC	21	3p	gagggtaggtcattatagctatcgctcgcggctatacacgctgttttctctgtatgtgagaggtcggcaaagagagagctgaagcagagatggagatgctgaactctctAGCTGTAATGACCACTCTCTCagctttctcc	((((((.((((((((((((((..(((...))).......((((.((((((.......)))))).)))).....(((((.(..((((..........))))..))))))))))))))))))))))))))............
novel-m0322-3p	novel-m0322	Unigene0087694	520	659	+	140	-38.7	39.29	0.7	CATGCATGGCTTAATACATCT	21	3p	ctgccctcgaaggtgtagtaagtcaggctgaatggcacaaggtaagaaggattcaaccttttagacctatcactatcaatattactaaaaaaaggcaacatataagcccCATGCATGGCTTAATACATCTtggagtattt	.....(((.((((((((.(((((((.((...((((....((((.((((((......))))))..)))).........................(((.........))))))))).))))))).)))))))).))).....
novel-m0323-3p	novel-m0323	Unigene0088182	113	264	-	152	-46.5	34.87	0.88	CTTCCTTTCCCTGCATCCAAA	21	3p	ttttgctctgtttggatgcatggaaatgaagcagtttcacggaaaattaccattttaaaccaaaaatggctaaacccatttttatttttagccaaaaaaagtttgttttacagcaaagtacCTTCCTTTCCCTGCATCCAAAtggagccatt	....((((((((((((((((.(((((.((((..((((...((.......)).....))))......((((((((............)))))))).....(.((((((....)))))).)..)))).))))).))))))))))))))))....
novel-m0324-5p	novel-m0324	Unigene0089252	314	586	+	273	-106.8	57.88	0.68	AGATTGAAGAGATTAGGGGCC	21	5p	cggtggttggAGATTGAAGAGATTAGGGGCCatagtcgccgctgctgccgcagtggaggcaggagtatcggccttgcccgactatcactaccacccaattttcgctgtgtccgagagcgacgggcaggtgctcaaaagcctggagagcatccgaatgaggatagctgatccgaatgcaaccgttccatccaggaatctccagcagtcggctctaatggcctctagccccctcaatccctttgacatcctcgtcgttggcggtggtgccactgg	((((((..((.((((((.(.(.(((((((((((((((((((((((....))))))).((((((.((....)))))))))))))).........(((.....(((((.(.....).))))).)))(((((........)))))...(((((((......)))).)))((.((((.(((....(((((.....))))).....))).)))).))...)))))))))).).).)))))))).....((((.(((((...))))).)))))))))).
novel-m0325-5p	novel-m0325	Unigene0090555	374	723	+	350	-127.4	57.14	0.64	TGAGCTCCGGGCTTGTTCGCC	21	5p	cagaaggagaTGAGCTCCGGGCTTGTTCGCCtcgccctcgaatgcgagcggcggcacgacaaggaccggatcggcctcttgaacgagccgctttggacaatgtactgcaatggcaagaagagtgggtacggtgtgaagagagagccaacagaggaggacatgaatgtgatggaaatcctcagaccggtgtcgatgggagccggagtcatccccagcgacgaggggccggatggtgagctggcctatgtcagggcctattttgaacacataatcgggtccaaagactccgagaccttctacatgctcagccctgaaggcgcccacggcccagagctcagcatattttttgt	(((((((...(((((((.(((((((..(((((((((((((....)))).)))).((((((....(((((.((((((((((...(((.(((((((...((.(((...))).))......))))))).).)).......))))).)))....(((((...(((.......)))....))))).))))))))))).))((.(((((..(((((.((.((........)).))..))))).)))))))...(((((((......((.........(((((((....))).)))).........))......))))))))))))..)).))))).))))))).....))))))).
novel-m0326-3p	novel-m0326	Unigene0090555	131	382	-	252	-80.2	51.59	0.62	TTGAAGATGGACCGAAAGACC	21	3p	ctccttctgaagtaccatcgtctgaatggccatctcaacgaggaacgtgggcaagcactttggagcctcttgcatgcagagactcaccctccctttacggtggccgaacagagtgccggtcactcgatttcccttcgacgatttaagggtatcgtgtagggacatctgtaggctgggcatcttgcaagctggtgtggtaaggggaattgtcTTGAAGATGGACCGAAAGACCttgaaaactttgatggctct	..((.((.(((((..((..((((...((((((((((((.((.((....(((..((..(((((.(((.....)).).))))).))..)))(((((((((.(..((((....(((((((((((((..(((.(((((.(.(((((........)))))).))))).))).)).)))).)))).)))......)))).).))))))))).)).))))).)))))).)))..))))..))...))))))).))....
novel-m0326-5p	novel-m0326	Unigene0090555	131	382	-	252	-80.2	51.59	0.62	TCTGAATGGCCATCTCAACGA	21	5p	ctccttctgaagtaccatcgTCTGAATGGCCATCTCAACGAggaacgtgggcaagcactttggagcctcttgcatgcagagactcaccctccctttacggtggccgaacagagtgccggtcactcgatttcccttcgacgatttaagggtatcgtgtagggacatctgtaggctgggcatcttgcaagctggtgtggtaaggggaattgtcttgaagatggaccgaaagaccttgaaaactttgatggctct	..((.((.(((((..((..((((...((((((((((((.((.((....(((..((..(((((.(((.....)).).))))).))..)))(((((((((.(..((((....(((((((((((((..(((.(((((.(.(((((........)))))).))))).))).)).)))).)))).)))......)))).).))))))))).)).))))).)))))).)))..))))..))...))))))).))....
novel-m0327-5p	novel-m0327	Unigene0091137	490	615	-	126	-35	44.44	0.62	TGGGGGCTCGAACCTGGCACC	21	5p	ggtgaggctaTGGGGGCTCGAACCTGGCACCtccgcttccttaggcgggagattaccagttgagctacaccaattattgtttctttatattatgatatgttgggttaagtcttccattgctttttt	...(((((.(((((((((..(((((((((...((((((....))))))(((((....(((((........)))))...)))))..............))))))))).)))).))))).)))))...
novel-m0328-5p	novel-m0328	Unigene0091266	48	150	-	103	-26	38.83	0.65	CGCAGATGATGATAAGTTTGAAT	23	5p	tgaggctctgCGCAGATGATGATAAGTTTGAATtagatctgattcttcttccatgaagattcaaaaatcgagctttttaaaactgatgcttggatcccctcag	(((((.(((((((((.(..(((.((((((((........(((.(((((......))))).)))....)))))))).)))..)))).)))..)))...))))).
novel-m0329-5p	novel-m0329	Unigene0091569	124	230	-	107	-45.97	44.86	0.96	CACCTGCACCTGTAACTCTACCC	23	5p	tctgcatttgCACCTGCACCTGTAACTCTACCCattttccttactcatttctcttcaacttttttcaatcatgcgggaaagatgcaggtgcaggtgtaggtgcagac	((((((((((((((((((((((((..(((.(((.........................................)))..))))))))))))))))))))))))))).
novel-m0330-5p	novel-m0330	Unigene0092556	69	197	-	129	-23.2	41.09	0.44	ATTGTTGAGGTGCGAACGAGAGT	23	5p	cgagggagagATTGTTGAGGTGCGAACGAGAGTctcacatcgatttgtgaggggaaaaaataaaatctaaggactgttataagattagatcactccacctattcttttgagctgacacatcatcgttga	(((.((.((...((((..(((.(((..((((((((((((......)))))).............((((((...((......)).))))))..........))))))))).)))))))..)).)).))).
novel-m0331-3p	novel-m0331	Unigene0092874	148	297	-	150	-71.1	40.67	1.17	TGTATCAAAATTGGGAGTGCC	21	3p	tgaatggatagtgattgatgcactcccaattccgatacaaggaggcactccctttgtcattttgcacccttcacattttaagtggtgaaaagtgcaaagagtgtctcctTGTATCAAAATTGGGAGTGCCtaaatcaaaacttcagttga	....((((...(((((...((((((((((((..(((((((((((((((((..((((.((((((.(((((((........))).)))).)))))))))))))))))))))))))))..))))))))))))...)))))....)))).....
novel-m0331-5p	novel-m0331	Unigene0092874	148	297	-	150	-71.1	40.67	1.17	CACTCCCAATTCCGATACAAG	21	5p	tgaatggatagtgattgatgCACTCCCAATTCCGATACAAGgaggcactccctttgtcattttgcacccttcacattttaagtggtgaaaagtgcaaagagtgtctccttgtatcaaaattgggagtgcctaaatcaaaacttcagttga	....((((...(((((...((((((((((((..(((((((((((((((((..((((.((((((.(((((((........))).)))).)))))))))))))))))))))))))))..))))))))))))...)))))....)))).....
novel-m0332-3p	novel-m0332	Unigene0093819	1	195	-	195	-55	41.54	0.68	ATGTATTTGTGGAGACTTGG	20	3p	agtctgaagacgtgaataaatggtggccatggacttcataatgcaatcactcatatgcagtttggagtgccatggccatgaatctagtgctttgtttgtctctctgttttcctgtacaaattagtagtccaatggtggtgtcaggtgtggttgggttATGTATTTGTGGAGACTTGGaatgaaaatttgtcgtct	.......((((((((((...(.((((((((((((((((...((((..........))))...)))))).)))))))))).).................((..((((.(((((...((((((..((((((((((.(((.(....).))).))))))))))..)))))))))))..))))..))..))))).)))))
novel-m0332-5p	novel-m0332	Unigene0093819	1	195	-	195	-55	41.54	0.68	TGGTGGCCATGGACTTCATA	20	5p	agtctgaagacgtgaataaaTGGTGGCCATGGACTTCATAatgcaatcactcatatgcagtttggagtgccatggccatgaatctagtgctttgtttgtctctctgttttcctgtacaaattagtagtccaatggtggtgtcaggtgtggttgggttatgtatttgtggagacttggaatgaaaatttgtcgtct	.......((((((((((...(.((((((((((((((((...((((..........))))...)))))).)))))))))).).................((..((((.(((((...((((((..((((((((((.(((.(....).))).))))))))))..)))))))))))..))))..))..))))).)))))
novel-m0333-3p	novel-m0333	Unigene0094768	175	280	-	106	-50.3	58.49	0.81	CGACCCGAGTTGCAGCCCTAG	21	3p	tgggttgattcgggttgggtcgagttctagagttcgggctgagaattcgggtcgggtcgggtcgagtggacccacCGACCCGAGTTGCAGCCCTAGagtaaaccat	..(((((((((((......))))))).........((((((..((((((((((((...(((((.....))))).)))))))))))).)))))).......))))..
novel-m0334-5p	novel-m0334	Unigene0094815	93	317	-	225	-66.5	50.22	0.59	AGGATTCATCGTACTCTTGCGA	22	5p	atgacatgagAGGATTCATCGTACTCTTGCGAgaaagttagatctacgtccttgaaaagtctaaagtgagatcccaaccccgatactaaggctgcgccgaaagggaggttcagccttcacgcactgagagcacccgcgaagaagccctcagcggtggagtcgctccactaacggtcgatcagtaaatgcgttccgcaaagaggggatgtaatcttttagaatcac	.(((....((((((((((((...((((((((.(((.(((.(((((((..................)).)))))..))).........(((((((.(((........))).)))))))..((((((((..(.((((((..((.....))..)))((((((...))))))....))))..)))))....))))))))).)))))..)))).))))))))....))).
novel-m0335-5p	novel-m0335	Unigene0096343	3489	3605	+	117	-34.8	27.35	1.09	AAGGAAAGTGCTTTCTTGGAA	21	5p	atgcatggaaAAGGAAAGTGCTTTCTTGGAAaatatttactaatataaaacgggtttgttcattttgttaaaaaaaattattatttttccaagaaagtattttctgctccattcgtc	(((.(((((...(((((((((((((((((((((...............((((((.........))))))...............)))))))))))))))))))))..))))).))).
novel-m0336-3p	novel-m0336	Unigene0098104	42	129	+	88	-36.3	56.82	0.73	CCTTGACCGTCAGGCCAACCC	21	3p	caagcccgttggggttgagaatgatcgaattcaagaccccgcttcttgaggcgggcgCCTTGACCGTCAGGCCAACCCttgaggttaa	..((((....(((((((.(..(((.((...(((((.((((((((....))))))).).))))).)))))..))))))))...))))..
novel-m0337-3p	novel-m0337	Unigene0098768	13	351	-	339	-111.9	44.54	0.74	CTCTAAGAGGCTTGGACACCT	21	3p	tttgagattaggaggttctgctttgtttggagtttcccttatctggtcctgatgtgctatcaaaaggtgtttttctgtaatgaaatgttgatagctaattcccccattacctagattggggagagagcatccattatcttgggtaggctgacccatttgcagcctcatggtgcatgcaccatgcacacctaggagtgttgcccaccaacagtggtggtgatgggtctatttgaaaggtctatgtttgaatgtggcccagcaaaaataactttgattagttgcacatgccctaaggattagtcagtgtgCTCTAAGAGGCTTGGACACCTtggtcttcaa	...(((((((((..((((.(((((..(((((((((((((.((((((...(((((.((((((((........((((......))))..)))))))).........))))).)))))).)))))))..(((..(((..((((((((((((((.(......)))))))(((((((....)))))))...))))))))))).)))((((((....))))))((.((((((((((((((.........)))))))).)))))).))....(((((......)))))(((((...((((...))))...))))))))))))))))..))))..)))))))))...
novel-m0338-5p	novel-m0338	Unigene0099745	116	211	-	96	-22.2	39.58	0.58	TATGAGGGAGTTAGAAATGCT	21	5p	actcctcgtaTATGAGGGAGTTAGAAATGCTcacttcttatccaactggaagaaatcctttgcatcaattcggcttatatttgaaactagaggagg	.((((((..(((((((.(((((.((..(((....((((..(((....))))))).......))))))))))..))))))).........)))))).
novel-m0339-5p	novel-m0339	Unigene0100308	798	900	-	103	-28.7	54.37	0.51	CAAGTCTCTTAGAGCACCCGA	21	5p	ccaaggtatcCAAGTCTCTTAGAGCACCCGActaatcatggggcatgtgcaagcctccctacccacatacaccgggtaactctacagggagtgacccgttgga	((((.(..((..(.((((((((((.(((((........((((...................)))).......)))))..))))).))))).)))..).)))).
novel-m0340-3p	novel-m0340	Unigene0100637	119	207	-	89	-30.5	38.2	0.9	TCGGCCGATACGATATGTAT	20	3p	cattggccgatacctatcatatcggtgtagatatctcgacctttaaaaaataagatatcTCGGCCGATACGATATGTATtaaccgagat	..((((..(((((.((((.(((((((..((((((((................))))))))..))))))).)))).)))))..))))...
novel-m0341-3p	novel-m0341	Unigene0100911	245	343	-	99	-40	45.45	0.89	TCCTGTTCACACTCACGAATT	21	3p	aggtgcccagaaatccgtagtgggatcagaattctttgtttttttggttgcccacaattccaaaggatTCCTGTTCACACTCACGAATTctgggcagca	.(.(((((((((.((.((((((((((..((((((((((...((.(((....))).))...))))))))))..)))).)))).)))).))))))))).).
novel-m0342-3p	novel-m0342	Unigene0102183	140	243	-	104	-43.5	49.04	0.85	ATTCCTCTCTTCTCCTTCAGG	21	3p	acgagagaagtcccctcttctgatggagaaggataggaattgaggtgggctctagcaatctccATTCCTCTCTTCTCCTTCAGGcgaagcttcttctcttcatc	..((((((((...(.((.(((((.((((((((..((((((.(((((..((....)).))))).)))))).)))))))).))))).)).)...))))))))....
novel-m0342-5p	novel-m0342	Unigene0102183	140	243	-	104	-43.5	49.04	0.85	TGATGGAGAAGGATAGGAATTG	22	5p	acgagagaagtcccctcttcTGATGGAGAAGGATAGGAATTGaggtgggctctagcaatctccattcctctcttctccttcaggcgaagcttcttctcttcatc	..((((((((...(.((.(((((.((((((((..((((((.(((((..((....)).))))).)))))).)))))))).))))).)).)...))))))))....
novel-m0343-5p	novel-m0343	Unigene0102821	6	188	-	183	-20.8	36.61	0.31	TAGTTTTAGGGTTTTAGGAGT	21	5p	ttggggtataTAGTTTTAGGGTTTTAGGAGTttagggttttaggctttagggttttatggtttacggtttagggtttttgggttttgggtttagggtttagggtttttgggttttggatttagggttttagtttttaggggtatagggtttaggttttaaggttttaggggtatagggtttta	........((((.((((((((((((((((....(((((((((((((.((((.(.....).)))).)))))))))))))....(((((((((((((((((((.....))))))))))))))))))).(((((.(((((......))))).))))))))))))))))))))).))))........
novel-m0344-3p	novel-m0344	Unigene0102821	350	530	-	181	-21.8	38.67	0.31	TGGTTTAAGGATTTTAGGGTT	21	3p	tttagggtgtaaggtttaggattttgggtttagggttagggtgtaggatttagggttttaggggtgttaggattttagggtttaggggttaggattttaggggtttagggtttagagtttaggatttaaggtttatggttttaggggtaaTGGTTTAAGGATTTTAGGGTTtcgggtttag	..............(((((((((((((((((..............))))))))))))))))).......((((((((((((((..((((((...((((((((.(.((((.((((((........)))))).)))).).))))))))....))))))..)))))))))))))).........
novel-m0345-3p	novel-m0345	Unigene0102957	100	223	-	124	-31.8	43.55	0.59	GATTCAAGGTATGGCAGTAGTT	22	3p	aggatctgaacgactgtatactttggctcctcctccagaaacagtggatcactcggtGATTCAAGGTATGGCAGTAGTTggtaaatgcttttgcattatttgattcaggagcatctcactcctt	.((((((.(((.((((((((((((((.((..((((((.......))))......)).)).))))))))).))))).))).)..(((((....)))))....)))))(((((.......))))).
novel-m0345-5p	novel-m0345	Unigene0102957	100	223	-	124	-31.8	43.55	0.59	CGACTGTATACTTTGGCTCCT	21	5p	aggatctgaaCGACTGTATACTTTGGCTCCTcctccagaaacagtggatcactcggtgattcaaggtatggcagtagttggtaaatgcttttgcattatttgattcaggagcatctcactcctt	.((((((.(((.((((((((((((((.((..((((((.......))))......)).)).))))))))).))))).))).)..(((((....)))))....)))))(((((.......))))).
novel-m0346-3p	novel-m0346	Unigene0103798	1257	1354	+	98	-23.5	54.08	0.44	CTTCGAGAAGAACCAGAACCC	21	3p	acatcaccggcggcctggacccttacgtggagttgaagattggcaattacaagggcatcaccaaacaCTTCGAGAAGAACCAGAACCCcgagtggagg	.(.(((((((.((.((((...(((.(.((((((((..(((.(.(.........).))))..))...)))))).))))..))))..))))).)))).).
novel-m0347-5p	novel-m0347	Unigene0103798	1418	1623	+	206	-71.8	58.25	0.6	TGAAGGACGATTTCGTGGGCC	21	5p	aaggacatggTGAAGGACGATTTCGTGGGCCgggtgaactttgagctaaccgatttgccgttgcgggtgccgccggatagccctctcgccccccagtggtacaaattggaggacaagagtggtgacaaagccaaaggggagattatgctggctgtttggatgggaacgcaagccgacgaggcgttccccgacgccaggcattccga	..(((..(((((..(((((.((((((.(((..((((((..(((.......))))))))).(((((..(.(((((((((((((.((((.(((((((((.......))))).)).......((((......))))..)).)))).......)))))))))).))).).)))))))).)))))))))...))..))))).....)))..
novel-m0348-3p	novel-m0348	Unigene0103798	3048	3129	-	82	-29.7	56.1	0.65	TCGAGCTCGTCCGGGTGTGCC	21	3p	atgcggacaatgtcacctggtcgcgacgtcggaaaagtgtcaaattcctcaTCGAGCTCGTCCGGGTGTGCCttgtcggctt	..((.(((((.(((((((((..((((..(((((..(((.....)))..))..)))..))))))))))).)).))))).))..
novel-m0349-3p	novel-m0349	Unigene0104264	1	119	+	119	-28.3	30.25	0.79	TTTTCCCGGAAAATTCATTGC	21	3p	aaatggaagtgaaagaactttctcggaaaataaccattttcaactaatacgtttagactcatttctagttttaagctaaaaatggctaTTTTCCCGGAAAATTCATTGCttttcatttc	(((((((((..((.(((.(((((.((((((((.(((((((...((((.....)))).........(((((...)))))))))))).)))))))).))))).))).))..))))))))).
novel-m0350-5p	novel-m0350	Unigene0104742	844	983	+	140	-46.8	35.71	0.94	AACCAGTTTGATTGAATGACT	21	5p	gctcataaaaAACCAGTTTGATTGAATGACTctagacatggttctgaaggacctgaaaatcaacggtagatagggatgcaattttattaagttcaatctcatggatagagtagttcaatcaagctgattttttagaggca	(((..(((((((.((((((((((((((.((((((..((((((((....))))).....(((.......))).(((((..(((((....)))))..))))))))..)))))).)))))))))))))).)))))))..))).
novel-m0351-3p	novel-m0351	Unigene0104742	772	1054	-	283	-112.3	37.1	1.07	TGATCATAGGTGGGCTCTACA	21	3p	tgagagctccatgtagaatccacatataataaatggggctgggtgggtttgaaagctttgtgtgtatatgatgcctctaaaaaatcagcttgattgaactactctatccatgagattgaacttaataaaattgcatccctatctaccgttgattttcaggtccttcagaaccatgtctagagtcattcaatcaaactggttttttatgagcattatatgtaggtataaatcttttaaacccacttaaccctaTGATCATAGGTGGGCTCTACAtagagctctc	.((((((((.(((((((.(((((.(((.((..((((((.((((((((((((((((.((((((((((((((((((.(((((((((((((.(((((((((..((((((..((((...((((((((...((((((..................)))))).))))...))))...))))..))))))..))))))))).))))))))))).))))))))))))))..)))))).)))))))))))))))).)))))).)).))).))))).))))))).))))))))
novel-m0352-3p	novel-m0352	Unigene0104747	343	528	-	186	-60.7	24.19	1.35	AATTCTGAAGTTCATAAAATT	21	3p	catctagtttgaattttatgaaaatcaggactgattttaagtaaaaagggtatatttttagatttcaaaattcagtacccaaagaattaagagggaatgtcatttttatttatgatttttgaagttaaaaaactatactgttttcacttaaaatcAATTCTGAAGTTCATAAAATTcagaacagat	.((((..(((((((((((((((..((((((.(((((((((((.((((.(((((((((((.((((((((((.......(((............)))...(((((........))))))))))))))).))))).)))))).)))).))))))))))).))))))..)))))))))))))))..))))
novel-m0353-3p	novel-m0353	Unigene0105316	342	489	-	148	-18.6	31.08	0.4	TTTGACTCTCTTTTCAAAGTTC	22	3p	taattaatattgactgaaagtagtcaaagaaatcaatcagcgttttatgactgactgacatattgccacctatctcactggatacaatcgtttcctttttaacaatttcaagtactTTTGACTCTCTTTTCAAAGTTCttttcatctt	...........(((((((((.((((((((...(((.(((((((...))).)))).)))..((((...............(((.((....)).)))...............)))).))))))))..)))))...))))...........
novel-m0354-5p	novel-m0354	Unigene0105386	583	776	+	194	-69.8	46.39	0.78	TATGCACTGTGAATTCTGGTG	21	5p	aatatgcagtTATGCACTGTGAATTCTGGTGctgtgttggctgatgtagagcccgctttccttctgaaatggaatacctgagatagatgcaaacatcatgatattgagtactctccacagcgctgagccacctgacacagcgctaggattcatagtgtatttcaggccatggtctggcccatcttctgctgttt	((((.((((..(((((((((((((((((((((((((((((.((..((..(((..(((((((.........))))...........((((....))))........(((....)))...))))))..)))).)))))))))))))))))))))))))))))....(((((.....)))))......)))))))).
novel-m0355-3p	novel-m0355	Unigene0106639	100	192	-	93	-20.8	45.16	0.5	AAACTTTGGTTTGTGGGGCCC	21	3p	aggtgcgctatatgtatataagcaaggatcacccgtaaacaagtttgcatgaagtttggtctAAACTTTGGTTTGTGGGGCCCacagtggacc	.(((.((((...(((......))).((....((((((((((((((((.((........)).)))))))..)))))))))..))..)))).)))
novel-m0356-3p	novel-m0356	Unigene0106753	123	228	+	106	-42.1	36.79	1.08	ATAGATCTTAGTACAAAGCTC	21	3p	gcttttccacggctttcttgaacttagtactcagatccatttctttcatttgaatccttctctaaATAGATCTTAGTACAAAGCTCaagaaagctgtgggaaaaca	..(((((((((((((((((((.(((.(((((.(((((.((((..(((....))).........)))).))))).))))).))).)))))))))))))))))))...
novel-m0356-5p	novel-m0356	Unigene0106753	123	228	+	106	-42.1	36.79	1.08	AACTTAGTACTCAGATCCATT	21	5p	gcttttccacggctttcttgAACTTAGTACTCAGATCCATTtctttcatttgaatccttctctaaatagatcttagtacaaagctcaagaaagctgtgggaaaaca	..(((((((((((((((((((.(((.(((((.(((((.((((..(((....))).........)))).))))).))))).))).)))))))))))))))))))...
novel-m0357-3p	novel-m0357	Unigene0108455	1	251	-	251	-65.1	32.67	0.79	TTTCCATGTCAAGTTTGTAG	20	3p	gtctaggaatttgaatgtggaaaatggggagtgatatatacatacacatacatacatacatgcatacacacacacatatgtatgtatgtatatgtctgtagaagcatctgtatctgtgcattttagggtaatccttgaactaaatcatgcatctttccttattcaagttcaacttgctttgatttttctatacctgtatctatctttcttctttttgttggtattaatgtTTTCCATGTCAAGTTTGTAGg	.((((.((((((((.((((((((((((((((.((((.(((((...(((((..((((((((((((((..........))))))))))))))))))).((((((((.(((.......(((((((((((((....))))))).......))))))...........(((((...)))))....))).))))))))..))))).)))).)))))).................)))))))))))))))))).))))
novel-m0358-3p	novel-m0358	Unigene0109187	417	534	-	118	-66	46.61	1.2	AAGCTGTGGGAGAATACCGAG	21	3p	gatgggctctctctgtactcttccacagctttcttgaactgcttgagagagaggcatatagtgcaagtatgagcactcagttcaagaAAGCTGTGGGAGAATACCGAGagagtctcaa	...((((((((((.(((.((((((((((((((((((((((((((......)))......(((((........)))))))))))))))))))))))))))).))).))))))))))...
novel-m0359-5p	novel-m0359	Unigene0109805	87	216	-	130	-47.1	45.38	0.8	TCATAGGTGGGCTCTACATGG	21	5p	aaccctatgaTCATAGGTGGGCTCTACATGGagctcccattgtaagagtactttatggggtgtgtcgctaaatcgttagacctcctccagtagacacctctatgtagggcccttcaatgatcaatctaaa	.......(((((((.((.(((((((((((((((.((((((.(((....)))...)))))).((((((((...................))).)))))))))))))))))))).)).))))))).......
novel-m0360-3p	novel-m0360	Unigene0111737	982	1194	-	213	-60.5	46.48	0.61	GTCATGGAACTCTAGAACAACA	22	3p	gacaaggtcatcttgagagagcttcgtggctcctcggccgaggtgtatttatatggggggcaagtgacctcttggaagaatgaccatggggaagagttgctttttgtgagcagcaaggcaatattcaaacctccaaaggctatacgtggtggaattcccatatgctttcctcaattttcaaGTCATGGAACTCTAGAACAACAtgggtttgca	..((((.((((.(((..((((.(((((((((........((((......((((((((((........((((.(((........))).))))....(((((((.....)))))))...............((.(((..(......).))).))..))))))))))....))))........))))))))).))))....))).)))).))))..
novel-m0361-5p	novel-m0361	Unigene0111946	318	396	+	79	-33	55.7	0.75	AGCCGCATCGTGGGAATTACC	21	5p	caacaggtccAGCCGCATCGTGGGAATTACCcctctcaccggagacgggcaattttgccgatgctgttgtaactgtgga	(.((((...((((.((((((..((((((.(((.((((....)))).))).))))))..)))))).))))...)))).).
novel-m0362-5p	novel-m0362	Unigene0112520	1	128	-	128	-23.8	49.22	0.38	AGTAACTCGAGGAGGCACCC	20	5p	gtgtacctgcAGTAACTCGAGGAGGCACCCctccattcacctttcgttcccatatgcatcggcttattctaaatcgacatatccaggttctcccaaccagcgtgactccttagtctacttacagtgca	.(((((.((.(((((((.((((((.((((......................(((((..((((.(((...))).)))))))))...((((.....)))).).))).))))))))).))))..)))))))
novel-m0363-3p	novel-m0363	Unigene0113497	190	262	-	73	-24.1	41.1	0.8	TGCAAACTTTGGATTGTGGGGCC	23	3p	tgtcaatgttcacctgcaaactagtttgcatgaaatttgaTGCAAACTTTGGATTGTGGGGCCcatattggac	..(((((((...(((((((.(((((((((((........)))))))))..)).)))))))....)))))))..
