# Supplementary material for: Small RNA and Degradome Sequencing in Floral Bud Reveal Roles of miRNAs in Dormancy Release of Chimonanthus praecox
Source: Int J Mol Sci. 2023 Feb 20;24(4):4210. doi: 10.3390/ijms24044210 (PMC9964840; doi:10.3390/ijms24044210)
Supplement: Supplementary file 1 [file ijms-24-04210-s001.zip › Table S6. The precursor with two mature miRNAs identified in wintersweet floral buds.xlsx]

## Sheet: Table S6
Table S6. The precursor with two mature miRNAs identified in wintersweet floral buds
hairpin(precursor)_id	mature_id	mature_arm	mature_seq	mature_length(nt)	hairpin(precursor)_seq
novel-m0010	novel-m0010-3p	3p	CCTTTCTTCACATCTCTCTGGCC	23	tttggaggggttacacgggcgagagagatgaagaaaggagtccagtgcatccatacgccggagtCCTTTCTTCACATCTCTCTGGCCcttctcatct
	novel-m0010-5p	5p	CGAGAGAGATGAAGAAAGGAG	21	tttggaggggttacacgggCGAGAGAGATGAAGAAAGGAGtccagtgcatccatacgccggagtcctttcttcacatctctctggcccttctcatct
novel-m0011	novel-m0011-3p	3p	CCTTTCTTCACATCTCTCTGGCC	23	tggatgggggaaaattttggaggggttacccgggcgagagacatgtgaagaaaaggagtgcaatgaggaaccgatatcgatgggaaatgattagggttctctcctagggctgcgttcggaagaaaggacaacggcgcttctcctagggctccgttgggatgaggattaattttggaggggttaccgcacgggagagatgaagaaggactctggcacttctcgcgtttggatgggagtacccatatcgatgggaaatgattagggttctttcaattttggaggggttacacgggcgagagagatgaagaaaggagtccagtgcatccatacgccggagtCCTTTCTTCACATCTCTCTGGCCcttctcatct
	novel-m0011-5p	3p	CGAGAGAGATGAAGAAAGGAG	21	tggatgggggaaaattttggaggggttacccgggcgagagacatgtgaagaaaaggagtgcaatgaggaaccgatatcgatgggaaatgattagggttctctcctagggctgcgttcggaagaaaggacaacggcgcttctcctagggctccgttgggatgaggattaattttggaggggttaccgcacgggagagatgaagaaggactctggcacttctcgcgtttggatgggagtacccatatcgatgggaaatgattagggttctttcaattttggaggggttacacgggCGAGAGAGATGAAGAAAGGAGtccagtgcatccatacgccggagtcctttcttcacatctctctggcccttctcatct
novel-m0023	novel-m0023-3p	3p	TTTACCATTTGTAACATCACC	21	gatgtgaatttggtgatgttgcacatgttaaaaaccttaaggcaaaattttgattttccatattttataaatttgatgtaaaaagcaaataagcaactactatgtattgctccgcatcaactttattttggttaacaattgtaaatccacacgcctacatcagtactgttccaatatgtttttacatcaaatttataaaataaggaaaatcaaaattttgacttaaggttTTTACCATTTGTAACATCACCaaattcatat
	novel-m0023-5p	5p	TGATGTTGCACATGTTAAAAA	21	gatgtgaatttggTGATGTTGCACATGTTAAAAAccttaaggcaaaattttgattttccatattttataaatttgatgtaaaaagcaaataagcaactactatgtattgctccgcatcaactttattttggttaacaattgtaaatccacacgcctacatcagtactgttccaatatgtttttacatcaaatttataaaataaggaaaatcaaaattttgacttaaggtttttaccatttgtaacatcaccaaattcatat
novel-m0036	novel-m0036-3p	3p	TCATCCATTCGCCACCTAAAT	21	acgaaaagcctcacgacgatttaggtggcgaatggatgacaagatggccaaaaatcccatccttcagaaacccagtttattaaaaaaaaccaaaaagaagacgaagaagcctcattgacgttgcctccattgttgccttcagtcaccatacttcgccatctcgTCATCCATTCGCCACCTAAATcgttgccatccttctctgct
	novel-m0036-5p	5p	TTAGGTGGCGAATGGATGACA	21	acgaaaagcctcacgacgatTTAGGTGGCGAATGGATGACAagatggccaaaaatcccatccttcagaaacccagtttattaaaaaaaaccaaaaagaagacgaagaagcctcattgacgttgcctccattgttgccttcagtcaccatacttcgccatctcgtcatccattcgccacctaaatcgttgccatccttctctgct
novel-m0037	novel-m0037-3p	3p	TTCAAAGTGGGCTCCATATAGAGG	24	tatgcacacctctatttggggctcactttgactttgtgtaataggtacattaagaagacctatatttaaagtgagccctatattaattttaatgtacctattacgtgagTTCAAAGTGGGCTCCATATAGAGGtgtgcatgg
	novel-m0037-5p	5p	TCTATTTGGGGCTCACTTTGACT	23	tatgcacaccTCTATTTGGGGCTCACTTTGACTttgtgtaataggtacattaagaagacctatatttaaagtgagccctatattaattttaatgtacctattacgtgagttcaaagtgggctccatatagaggtgtgcatgg
novel-m0077	novel-m0077-3p	3p	CCCACAAACATGCCATGTGTCCT	23	attttaagataagacatgtggcatgtttgtggggcgttagtgtgatcaagtgaaaaggaagtctctttagatcaggctcctactgaagctaagttcaatggagtttctaactacttagtagaagggcatggaatgtatggtcaatactactatatcagtcctctatatttcttgtcttaagatggaataggctgacttttggggcaagattaatttaaagattctaccttttcattttgtggggtcaatgtgcCCCACAAACATGCCATGTGTCCTatttttaaaa
	novel-m0077-5p	5p	GACATGTGGCATGTTTGTGGGGC	23	attttaagataaGACATGTGGCATGTTTGTGGGGCgttagtgtgatcaagtgaaaaggaagtctctttagatcaggctcctactgaagctaagttcaatggagtttctaactacttagtagaagggcatggaatgtatggtcaatactactatatcagtcctctatatttcttgtcttaagatggaataggctgacttttggggcaagattaatttaaagattctaccttttcattttgtggggtcaatgtgccccacaaacatgccatgtgtcctatttttaaaa
novel-m0078	novel-m0078-3p	3p	ATTTCGAGACTGCTCAAGCCCT	22	cacggactctttctgtttgagtagtttggaatgaaacgagtaatattattcttcgccgttaatttcATTTCGAGACTGCTCAAGCCCTtggaatccgt
	novel-m0078-5p	5p	TGTTTGAGTAGTTTGGAATGA	21	cacggactctttcTGTTTGAGTAGTTTGGAATGAaacgagtaatattattcttcgccgttaatttcatttcgagactgctcaagcccttggaatccgt
novel-m0093	novel-m0093-3p	3p	CTACCCAGTTGATGCCCATAGG	22	gttcaagtcctatgggcgtcaaataggtagtcagtccatggaaataatttaccagattcaaatattaaggctaaccctagattgatgggatacatggcttacatgatgatgatttggctttggtatttattactatattcggcaaattgtttcccatatgttgaCTACCCAGTTGATGCCCATAGGacttcccgcaacctttgtggttgacaatgagca
	novel-m0093-5p	5p	TATGGGCGTCAAATAGGTAGTC	22	gttcaagtccTATGGGCGTCAAATAGGTAGTCagtccatggaaataatttaccagattcaaatattaaggctaaccctagattgatgggatacatggcttacatgatgatgatttggctttggtatttattactatattcggcaaattgtttcccatatgttgactacccagttgatgcccataggacttcccgcaacctttgtggttgacaatgagca
novel-m0099	novel-m0099-3p	3p	TTACTCTTCTTTCCTTGCATC	21	gggtaaaatctctgtttggatgcacgggagggaggttagtttctctggtaacagccactttttaaccaaaatagctgttgctaagaaaTTACTCTTCTTTCCTTGCATCcaaacggagccttggaactt
	novel-m0099-5p	5p	TGCACGGGAGGGAGGTTAGTT	21	gggtaaaatctctgtttggaTGCACGGGAGGGAGGTTAGTTtctctggtaacagccactttttaaccaaaatagctgttgctaagaaattactcttctttccttgcatccaaacggagccttggaactt
novel-m0103	novel-m0103-3p	3p	TTGAGCCCCGCCAATATCGCGA	22	acgctttggaagagaaaaggcgatgtttgtcggggttcaatctgaaggccatctttacatgaacaagaaacagtaaaatggcgtcagaTTGAGCCCCGCCAATATCGCGAtaaatcgccggaatctaaga
	novel-m0103-5p	5p	CGATGTTTGTCGGGGTTCAATC	22	acgctttggaagagaaaaggCGATGTTTGTCGGGGTTCAATCtgaaggccatctttacatgaacaagaaacagtaaaatggcgtcagattgagccccgccaatatcgcgataaatcgccggaatctaaga
novel-m0119	novel-m0119-3p	3p	GCTGGACATGGACCCATCACT	21	cttgccggtggagccttcgacggtggatccatgaacccagcagtctcctttggacctgctctggtcaGCTGGACATGGACCCATCACTgggtttactgggctggccct
	novel-m0119-5p	5p	CGGTGGATCCATGAACCCAGCA	22	cttgccggtggagccttcgaCGGTGGATCCATGAACCCAGCAgtctcctttggacctgctctggtcagctggacatggacccatcactgggtttactgggctggccct
novel-m0122	novel-m0122-3p	3p	TTTCAAACTCACCCATCCTCA	21	gcgggttggatgggtttgaaagattttgtgtgtttataatgcctaaaaaatgaacttgaaattaactctagccatggttttgaaggaccaaaaaatcaacgataaataaaggagcaattttatcaagtttgatcacatggctagtgtcatttaatttagccatttttttcataagcattagatacacacatcTTTCAAACTCACCCATCCTCA
	novel-m0122-5p	5p	GGGTTGGATGGGTTTGAAAGA	21	gcGGGTTGGATGGGTTTGAAAGAttttgtgtgtttataatgcctaaaaaatgaacttgaaattaactctagccatggttttgaaggaccaaaaaatcaacgataaataaaggagcaattttatcaagtttgatcacatggctagtgtcatttaatttagccatttttttcataagcattagatacacacatctttcaaactcacccatcctca
novel-m0126	novel-m0126-3p	3p	TTCAAGTTCATGAAAGCTGTG	21	aatcccttcatgctcttccacagctttcttgaacttggatagtgtccacatgattgaattggaggttgtctattcatcatcttccactctttatTTCAAGTTCATGAAAGCTGTGggaaaccatgttgggattgg
	novel-m0126-5p	5p	CAGCTTTCTTGAACTTGGATA	21	aatcccttcatgctcttccaCAGCTTTCTTGAACTTGGATAgtgtccacatgattgaattggaggttgtctattcatcatcttccactctttatttcaagttcatgaaagctgtgggaaaccatgttgggattgg
novel-m0127	novel-m0127-3p	3p	TTCAAGTTCATGAAAGCTGTG	21	aatcccttcatgctcttccacagctttcttgaacttggatagtgtccacatgattgaattggaggttgtctattcatcatcttccactctttatTTCAAGTTCATGAAAGCTGTGggaaaccatgttgggattgg
	novel-m0127-5p	5p	CAGCTTTCTTGAACTTGGATA	21	aatcccttcatgctcttccaCAGCTTTCTTGAACTTGGATAgtgtccacatgattgaattggaggttgtctattcatcatcttccactctttatttcaagttcatgaaagctgtgggaaaccatgttgggattgg
novel-m0131	novel-m0131-3p	3p	TTTGTGAATTCTACGTTAATCAG	23	aaatagatatgctgatcaacgtagaattcgcacaaatattggttgattTTTGTGAATTCTACGTTAATCAGtgtatctatt
	novel-m0131-5p	5p	GATCAACGTAGAATTCGCACAAA	23	aaatagatatgctGATCAACGTAGAATTCGCACAAAtattggttgatttttgtgaattctacgttaatcagtgtatctatt
novel-m0141	novel-m0141-3p	3p	TATTGGTGCAGGCCCAAATGGGC	23	attgtagggcccatgtgggctagtgtcaatacgttggaatgggtgggatatatcgttcaccatatgtattgtaagtagcctataagtttttgacttttgtaaagtgatgattttctttatcctatttgacaaggctaagatggttagatgaggataaaacttcatccaacacttacatatgttgtcttttacttgtcctacacattttgttgTATTGGTGCAGGCCCAAATGGGCcctataaa
	novel-m0141-5p	5p	CCATGTGGGCTAGTGTCAATACG	23	attgtagggcCCATGTGGGCTAGTGTCAATACGttggaatgggtgggatatatcgttcaccatatgtattgtaagtagcctataagtttttgacttttgtaaagtgatgattttctttatcctatttgacaaggctaagatggttagatgaggataaaacttcatccaacacttacatatgttgtcttttacttgtcctacacattttgttgtattggtgcaggcccaaatgggccctataaa
novel-m0147	novel-m0147-3p	3p	TTTGAGCCAGGGTCGGTGGAC	21	gtgttcttctgtcaagctaggctctgggaaaggctgtacgcaaaggTTTGAGCCAGGGTCGGTGGACaggggtagca
	novel-m0147-5p	5p	CAAGCTAGGCTCTGGGAAAGGC	22	gtgttcttctgtCAAGCTAGGCTCTGGGAAAGGCtgtacgcaaaggtttgagccagggtcggtggacaggggtagca
novel-m0148	novel-m0148-3p	3p	TTTCCGAGAGGGCTTAAACCAC	22	gtaatctctcggaggcttgtggcttgagtcgatcggagaagaagaaacgagtaggagtaatatctaccgttgatttaTTTCCGAGAGGGCTTAAACCACtggattccgggaggccctcc
	novel-m0148-5p	5p	GGCTTGAGTCGATCGGAGAA	20	gtaatctctcggaggcttgtGGCTTGAGTCGATCGGAGAAgaagaaacgagtaggagtaatatctaccgttgatttatttccgagagggcttaaaccactggattccgggaggccctcc
novel-m0149	novel-m0149-3p	3p	TTGGGATTGGGCTTGGGCTTT	21	cttgatgggcttgaactaaaagctctagttcactctcaacccaagtaaattgtatagctcaaattttcagtttatttaggTTGGGATTGGGCTTGGGCTTTtgaagtctttgaggcctgtt
	novel-m0149-5p	5p	AGCTCTAGTTCACTCTCAACC	21	cttgatgggcttgaactaaaAGCTCTAGTTCACTCTCAACCcaagtaaattgtatagctcaaattttcagtttatttaggttgggattgggcttgggcttttgaagtctttgaggcctgtt
novel-m0151	novel-m0151-3p	3p	TTTCTATCTTCGACATAGCGCG	22	tatctttttcttctttctggcgctgtatcggacgtagaaatatcgtaacaacaaaaaagacgtggttggagaaaaaaataggggtgttggcgacgatggaaaagaaacaggtcaaaaaaacgaaagttcaagaaaaagggtggttttccatcttgcgattcgcagcacctcgttctccatcatctctccggcgatacaccatcacttctatttttttcttctacaatctcttgtttcttgttatgatgTTTCTATCTTCGACATAGCGCGagagagaagggaaacataga
	novel-m0151-5p	5p	CGCTGTATCGGACGTAGAAATA	22	tatctttttcttctttctggCGCTGTATCGGACGTAGAAATAtcgtaacaacaaaaaagacgtggttggagaaaaaaataggggtgttggcgacgatggaaaagaaacaggtcaaaaaaacgaaagttcaagaaaaagggtggttttccatcttgcgattcgcagcacctcgttctccatcatctctccggcgatacaccatcacttctatttttttcttctacaatctcttgtttcttgttatgatgtttctatcttcgacatagcgcgagagagaagggaaacataga
novel-m0152	novel-m0152-3p	3p	CCCACCGATCCCAACCTCTCC	21	aaaaaggaggcagaagatggagcggtcgggatacggaagggacggcatctacaggtctcttcgtcctccacttcgcttcCCCACCGATCCCAACCTCTCCatggtctccttccttttccg
	novel-m0152-5p	5p	AGCGGTCGGGATACGGAAGGGA	22	aaaaaggaggcagaagatggAGCGGTCGGGATACGGAAGGGAcggcatctacaggtctcttcgtcctccacttcgcttccccaccgatcccaacctctccatggtctccttccttttccg
novel-m0164	novel-m0164-3p	3p	TGAAACTTCAGCCACCCCCTAT	22	gaccacatggacagagggtgggtgaagtttcacctctattaaatcatcctatcttttttgatctttaattggtaaattagggacttagtatttatcaaaatttgaaggtgacttaaaatttgtcatagtttaaaggccaaaatcagaaggctaggaagatgacttgggaTGAAACTTCAGCCACCCCCTATtgatgtattc
	novel-m0164-5p	5p	AGAGGGTGGGTGAAGTTTCACC	22	gaccacatggacAGAGGGTGGGTGAAGTTTCACCtctattaaatcatcctatcttttttgatctttaattggtaaattagggacttagtatttatcaaaatttgaaggtgacttaaaatttgtcatagtttaaaggccaaaatcagaaggctaggaagatgacttgggatgaaacttcagccaccccctattgatgtattc
novel-m0172	novel-m0172-3p	3p	TTTGAAACATAGTGACTCCATG	22	tctttctttattttttttccttggagtttactggttttaaattcaatttgtatttcaaattctcctgaatgaatcgtcatcaactcggtacttcacttccttctgagttgtattccttgttgaatcgatcatgaaaatcattcccaatggacacaactataaattatcaatttaattgatacattcaaattcaacggaagtgaaatttatatcattgacaattcatccacatggaatttaaaacatataagagcaatttgaaTTTGAAACATAGTGACTCCATGgaaagaaaatttaaaaataa
	novel-m0172-5p	5p	TTGGAGTTTACTGGTTTTAAATT	23	tctttctttattttttttccTTGGAGTTTACTGGTTTTAAATTcaatttgtatttcaaattctcctgaatgaatcgtcatcaactcggtacttcacttccttctgagttgtattccttgttgaatcgatcatgaaaatcattcccaatggacacaactataaattatcaatttaattgatacattcaaattcaacggaagtgaaatttatatcattgacaattcatccacatggaatttaaaacatataagagcaatttgaatttgaaacatagtgactccatggaaagaaaatttaaaaataa
novel-m0198	novel-m0198-3p	3p	TAGTCGAATCAGCGAAAGAGTC	22	gtggattcttcctcttccgactctttcgttgttccactgctcttttgaggaggagagagcctacttttctcttttaacaggcgTAGTCGAATCAGCGAAAGAGTCagaggagaagagtcgtttca
	novel-m0198-5p	5p	CTCTTTCGTTGTTCCACTGCT	21	gtggattcttcctcttccgaCTCTTTCGTTGTTCCACTGCTcttttgaggaggagagagcctacttttctcttttaacaggcgtagtcgaatcagcgaaagagtcagaggagaagagtcgtttca
novel-m0207	novel-m0207-3p	3p	TTCCAAGAAAATAATTTCCTTT	22	gttttgtttggatgcatggaaaggaaatgctttcttggcaaatgcccagttttaactaaaattccattggttcaaccatttatggttaaacatagttatTTCCAAGAAAATAATTTCCTTTcattgcatccaaacaactac
	novel-m0207-5p	5p	AAGGAAATGCTTTCTTGGCA	20	gttttgtttggatgcatggaAAGGAAATGCTTTCTTGGCAaatgcccagttttaactaaaattccattggttcaaccatttatggttaaacatagttatttccaagaaaataatttcctttcattgcatccaaacaactac
novel-m0224	novel-m0224-3p	3p	TTCTTATGTGGAGAATTCACT	21	ttgcattttgtaccaacacaagtgaattctccacataagaacgttctatcatgtgtatcgaatggtttggagaagtcatgcatactcttgatggaacacgcttctgcagatgatcttgtacaaaaaaatggtggggaaacaaccctccacttagccatccttgataacatactggagttgcacaaacgcatgctcgagatttgtcttgacctgggcgataaacaatgcggagacgcacgccgctcatcctcgcttggaagatcagtgcctacagacaatcgaataTTCTTATGTGGAGAATTCACTcatgtttgtacaaaatttag
	novel-m0224-5p	5p	AGTGAATTCTCCACATAAGAA	21	ttgcattttgtaccaacacaAGTGAATTCTCCACATAAGAAcgttctatcatgtgtatcgaatggtttggagaagtcatgcatactcttgatggaacacgcttctgcagatgatcttgtacaaaaaaatggtggggaaacaaccctccacttagccatccttgataacatactggagttgcacaaacgcatgctcgagatttgtcttgacctgggcgataaacaatgcggagacgcacgccgctcatcctcgcttggaagatcagtgcctacagacaatcgaatattcttatgtggagaattcactcatgtttgtacaaaatttag
novel-m0226	novel-m0226-3p	3p	CGACCCGAGTTGCAGCCCTAC	21	tcgggttttttcattcgggtcgggtcgggttgggttcaatatggagtaagttgggttagggttgggtttatgaaaacccggccggccCGACCCGAGTTGCAGCCCTACacctacctatacctccaacg
	novel-m0226-5p	5p	CGGGTCGGGTTGGGTTCAATA	21	tcgggttttttcattcgggtCGGGTCGGGTTGGGTTCAATAtggagtaagttgggttagggttgggtttatgaaaacccggccggcccgacccgagttgcagccctacacctacctatacctccaacg
novel-m0227	novel-m0227-3p	3p	CATTTCCTTTCAGCCATCCTCTCT	24	gtataatcaaagaggatgactaagtgcaatgcttgtttagcctccttagaggggcaatgcttgtttagcattcttaacctttcttggttggttggtcactagtggggatgttgtagggtaatgcacaagtgttggaatgctactagtggctaaccaattgagaaagtctgaggaggtcaaataggCATTTCCTTTCAGCCATCCTCTCTgattctaca
	novel-m0227-5p	5p	AGAGGATGACTAAGTGCAATGCT	23	gtataatcaaAGAGGATGACTAAGTGCAATGCTtgtttagcctccttagaggggcaatgcttgtttagcattcttaacctttcttggttggttggtcactagtggggatgttgtagggtaatgcacaagtgttggaatgctactagtggctaaccaattgagaaagtctgaggaggtcaaataggcatttcctttcagccatcctctctgattctaca
novel-m0238	novel-m0238-3p	3p	TGGAGTGACCCAAGTCCTTTATA	23	ataccgtttgttaggacctgggcttccagcccaaaagactaacctcttaggTGGAGTGACCCAAGTCCTTTATAaactctta
	novel-m0238-5p	5p	TTAGGACCTGGGCTTCCAGCC	21	ataccgtttgTTAGGACCTGGGCTTCCAGCCcaaaagactaacctcttaggtggagtgacccaagtcctttataaactctta
novel-m0241	novel-m0241-3p	3p	ATTGTGAATATCGGCCGATAAC	22	ctccaaccgatatcggccgatattttgatatcgtccgatATTGTGAATATCGGCCGATAACgatatata
	novel-m0241-5p	5p	TATCGGCCGATATTTTGATAT	21	ctccaaccgaTATCGGCCGATATTTTGATATcgtccgatattgtgaatatcggccgataacgatatata
novel-m0246	novel-m0246-3p	3p	ATTACAAGTGCACTAGCCATG	21	ctcagcagccaaccaccccatgaatagtgcacatgtaatctcatccatgctttaatcaaagcacgagATTACAAGTGCACTAGCCATGgcctgattgggtgttttcac
	novel-m0246-5p	5p	TGAATAGTGCACATGTAATCT	21	ctcagcagccaaccaccccaTGAATAGTGCACATGTAATCTcatccatgctttaatcaaagcacgagattacaagtgcactagccatggcctgattgggtgttttcac
novel-m0264	novel-m0264-3p	3p	TCATAGAGGCACTTGTTGATGAA	23	ccaaacctttcatcaaccaacgtccctatgactaagtatatggtttttcatggactctattcaaattcaaacctttcaatcaacttatgcccctgtgaattagtatgatgtccttcctcagacactgttagattgatcaccagtgaaattatgatagttctatacaagaatgccctcacatctgatgaatccaatgtgcagtccacaatcaactggaatccaatgaaagatcatatatcaatTCATAGAGGCACTTGTTGATGAAaggttcgga
	novel-m0264-5p	5p	CATCAACCAACGTCCCTATGACT	23	ccaaacctttCATCAACCAACGTCCCTATGACTaagtatatggtttttcatggactctattcaaattcaaacctttcaatcaacttatgcccctgtgaattagtatgatgtccttcctcagacactgttagattgatcaccagtgaaattatgatagttctatacaagaatgccctcacatctgatgaatccaatgtgcagtccacaatcaactggaatccaatgaaagatcatatatcaattcatagaggcacttgttgatgaaaggttcgga
novel-m0307	novel-m0307-3p	3p	CGGTCCGGTTCTGATAACACT	21	cttaatttatcagaaggttttttaatcagatcggaccgagaagatggcggttgaggtcgaacctgcagcccaaccgcggtccggtcCGGTCCGGTTCTGATAACACTgataagaactatccactacc
	novel-m0307-5p	5p	TTTAATCAGATCGGACCGAGA	21	cttaatttatcagaaggtttTTTAATCAGATCGGACCGAGAagatggcggttgaggtcgaacctgcagcccaaccgcggtccggtccggtccggttctgataacactgataagaactatccactacc
novel-m0326	novel-m0326-3p	3p	TTGAAGATGGACCGAAAGACC	21	ctccttctgaagtaccatcgtctgaatggccatctcaacgaggaacgtgggcaagcactttggagcctcttgcatgcagagactcaccctccctttacggtggccgaacagagtgccggtcactcgatttcccttcgacgatttaagggtatcgtgtagggacatctgtaggctgggcatcttgcaagctggtgtggtaaggggaattgtcTTGAAGATGGACCGAAAGACCttgaaaactttgatggctct
	novel-m0326-5p	5p	TCTGAATGGCCATCTCAACGA	21	ctccttctgaagtaccatcgTCTGAATGGCCATCTCAACGAggaacgtgggcaagcactttggagcctcttgcatgcagagactcaccctccctttacggtggccgaacagagtgccggtcactcgatttcccttcgacgatttaagggtatcgtgtagggacatctgtaggctgggcatcttgcaagctggtgtggtaaggggaattgtcttgaagatggaccgaaagaccttgaaaactttgatggctct
novel-m0331	novel-m0331-3p	3p	TGTATCAAAATTGGGAGTGCC	21	tgaatggatagtgattgatgcactcccaattccgatacaaggaggcactccctttgtcattttgcacccttcacattttaagtggtgaaaagtgcaaagagtgtctcctTGTATCAAAATTGGGAGTGCCtaaatcaaaacttcagttga
	novel-m0331-5p	5p	CACTCCCAATTCCGATACAAG	21	tgaatggatagtgattgatgCACTCCCAATTCCGATACAAGgaggcactccctttgtcattttgcacccttcacattttaagtggtgaaaagtgcaaagagtgtctccttgtatcaaaattgggagtgcctaaatcaaaacttcagttga
novel-m0332	novel-m0332-3p	3p	ATGTATTTGTGGAGACTTGG	20	agtctgaagacgtgaataaatggtggccatggacttcataatgcaatcactcatatgcagtttggagtgccatggccatgaatctagtgctttgtttgtctctctgttttcctgtacaaattagtagtccaatggtggtgtcaggtgtggttgggttATGTATTTGTGGAGACTTGGaatgaaaatttgtcgtct
	novel-m0332-5p	5p	TGGTGGCCATGGACTTCATA	20	agtctgaagacgtgaataaaTGGTGGCCATGGACTTCATAatgcaatcactcatatgcagtttggagtgccatggccatgaatctagtgctttgtttgtctctctgttttcctgtacaaattagtagtccaatggtggtgtcaggtgtggttgggttatgtatttgtggagacttggaatgaaaatttgtcgtct
novel-m0342	novel-m0342-3p	3p	ATTCCTCTCTTCTCCTTCAGG	21	acgagagaagtcccctcttctgatggagaaggataggaattgaggtgggctctagcaatctccATTCCTCTCTTCTCCTTCAGGcgaagcttcttctcttcatc
	novel-m0342-5p	5p	TGATGGAGAAGGATAGGAATTG	22	acgagagaagtcccctcttcTGATGGAGAAGGATAGGAATTGaggtgggctctagcaatctccattcctctcttctccttcaggcgaagcttcttctcttcatc
novel-m0345	novel-m0345-3p	3p	GATTCAAGGTATGGCAGTAGTT	22	aggatctgaacgactgtatactttggctcctcctccagaaacagtggatcactcggtGATTCAAGGTATGGCAGTAGTTggtaaatgcttttgcattatttgattcaggagcatctcactcctt
	novel-m0345-5p	5p	CGACTGTATACTTTGGCTCCT	21	aggatctgaaCGACTGTATACTTTGGCTCCTcctccagaaacagtggatcactcggtgattcaaggtatggcagtagttggtaaatgcttttgcattatttgattcaggagcatctcactcctt
novel-m0356	novel-m0356-3p	3p	ATAGATCTTAGTACAAAGCTC	21	gcttttccacggctttcttgaacttagtactcagatccatttctttcatttgaatccttctctaaATAGATCTTAGTACAAAGCTCaagaaagctgtgggaaaaca
	novel-m0356-5p	5p	AACTTAGTACTCAGATCCATT	21	gcttttccacggctttcttgAACTTAGTACTCAGATCCATTtctttcatttgaatccttctctaaatagatcttagtacaaagctcaagaaagctgtgggaaaaca
