# Supplementary material for: Small RNA and Degradome Sequencing in Floral Bud Reveal Roles of miRNAs in Dormancy Release of Chimonanthus praecox
Source: Int J Mol Sci. 2023 Feb 20;24(4):4210. doi: 10.3390/ijms24044210 (PMC9964840; doi:10.3390/ijms24044210)
Supplement: Supplementary file 1 [file ijms-24-04210-s001.zip › Table S7. 301 differentially expressed miRNAs identified in wintersweet floral buds .xlsx]

## Sheet: Table S7
Table S7. 301 differentially expressed miRNAs identified in wintersweet floral buds
id	TPM						FB150/FB.Nov		FB300/FB.Nov		FB450/FB.Nov		IB570/FB.Nov		nF16/FB.Nov		FB150/nF16		FB300/nF16		FB450/nF16		IB570/nF16		FB300/FB150		FB450/FB150		IB570/FB150		FB450/FB300		IB570/FB300		IB570/FB450
	FB.Nov	FB150	FB300	FB450	IB570	nF16	log2(FC)	PValue	log2(FC)	PValue	log2(FC)	PValue	log2(FC)	PValue	log2(FC)	PValue	log2(FC)	PValue	log2(FC)	PValue	log2(FC)	PValue	log2(FC)	PValue	log2(FC)	PValue	log2(FC)	PValue	log2(FC)	PValue	log2(FC)	PValue	log2(FC)	PValue	log2(FC)	PValue
miR1507-y	0.609133	0.169567	0.876933	0.0793333	1.23587	2.2767	-1.85767	0.471795	0.536091	0.84394	-3.05152	0.362256	1.03267	0.431097	1.91588	0.29345	-3.77355	0.0242985	-1.37979	0.461854	-4.96739	0.0121377	-0.883204	0.827477	2.39376	0.169567	-1.19384	1	2.89035	0.0643047	-3.58761	0.134929	0.496582	0.661981	4.08419	0.0385771
miR1511-y	95.8629	107.875	93.4852	125.832	48.6609	80.44	0.170316	0.673201	-0.0362341	0.790698	0.392459	0.408773	-0.978211	0.457568	-0.253059	0.712917	0.423375	0.352014	0.216825	0.567873	0.645517	0.243838	-0.725152	0.85726	-0.20655	0.97613	0.222143	0.444386	-1.14853	0.0833683	0.428693	0.565333	-0.941976	0.201594	-1.37067	0.0292107
miR1515-x	0.673	0.335833	0.2058	0.01	0.0766667	0.693467	-1.01009	0.589287	-1.72576	0.404064	-6.06537	0.101306	-3.25802	0.272921	0.0503834	0.860908	-1.06047	0.350487	-1.77614	0.229882	-6.11575	0.0293778	-3.3084	0.165891	-0.71567	1	-5.05528	0.240707	-2.24793	0.565869	-4.33961	0.364748	-1.53226	0.735741	2.80735	1
miR156-x	1517.79	1737.37	903.375	1154.9	392.655	796.435	0.194927	0.490546	-0.748577	0.272236	-0.394205	0.324424	-1.95064	0.00308537	-0.930345	0.259972	1.12527	0.0349489	0.181768	0.749531	0.53614	0.476853	-1.0203	0.243121	-0.943505	0.014334	-0.589133	0.013601	-2.14557	2.9425e-07	0.354372	0.649331	-1.20206	0.0258704	-1.55644	0.00831174
miR156-y	35.6782	49.1097	17.3468	28.8975	12.2704	22.8959	0.460964	0.223164	-1.04037	0.114646	-0.304098	0.487558	-1.53986	0.104142	-0.639956	0.485504	1.10092	0.0377602	-0.400418	0.501033	0.335858	0.755444	-0.899905	0.456129	-1.50134	0.00167251	-0.765062	0.0104293	-2.00082	0.00496557	0.736275	0.187575	-0.499487	0.590803	-1.23576	0.214557
miR157-x	1206.44	1546.89	705.641	989.78	249.085	531.516	0.358612	0.233398	-0.773757	0.24386	-0.285582	0.524666	-2.27605	0.000494411	-1.18258	0.146021	1.54119	0.00501532	0.408819	0.500693	0.896994	0.184976	-1.09347	0.235955	-1.13237	0.00408335	-0.644193	0.0173881	-2.63466	8.48105e-09	0.488175	0.447048	-1.50229	0.0133412	-1.99047	0.000828356
miR157-y	25.7878	40.6561	9.64763	23.2873	2.36397	13.4171	0.656782	0.144606	-1.41844	0.0361245	-0.147145	0.816348	-3.44741	2.16756e-06	-0.942621	0.272808	1.5994	0.00415413	-0.475822	0.47416	0.795476	0.253955	-2.50479	0.0029668	-2.07523	0.000172847	-0.803928	0.023709	-4.10419	1.9411e-12	1.2713	0.0271504	-2.02897	0.00379746	-3.30026	1.05758e-07
miR159-x	0.562533	0.2638	0.432	0.413267	0.5589	1.7734	-1.11084	0.617267	-0.403345	1	-0.444866	1	-0.00934841	0.716103	1.65651	0.0599939	-2.76735	0.00517424	-2.05985	0.110709	-2.10137	0.0196331	-1.66586	0.201169	0.707495	0.733775	0.665974	0.778248	1.10149	0.265772	-0.0415209	1	0.393996	0.789652	0.435517	0.539361
miR164-y	351.235	416.281	411.621	342.52	653.579	1490.37	0.245123	0.427529	0.228881	0.349464	-0.0362473	0.963955	0.895927	0.00501698	2.08516	3.64187e-05	-1.84004	1.75746e-06	-1.85628	0.000583039	-2.12141	1.78145e-07	-1.18923	0.152437	-0.0162417	0.581554	-0.28137	0.19769	0.650803	0.00113623	-0.265129	0.236966	0.667045	0.0749288	0.932174	0.000256217
miR166-x	3163.17	2233.89	1407.49	3238.02	1041.81	1745.87	-0.501812	0.216337	-1.16825	0.0624946	0.0337412	0.989996	-1.60228	0.0644167	-0.857428	0.26397	0.355616	0.56572	-0.310817	0.627561	0.89117	0.169225	-0.744847	0.630883	-0.666433	0.197004	0.535554	0.202121	-1.10046	0.217856	1.20199	0.023978	-0.43403	0.635132	-1.63602	0.0344476
miR167-x	73728.5	80973.9	62032.6	69941	21145.2	58654.8	0.135236	0.642374	-0.249196	0.996718	-0.0760825	0.883539	-1.80189	0.0104727	-0.329972	0.822158	0.465208	0.33846	0.0807765	0.811022	0.25389	0.792127	-1.47192	0.0455125	-0.384431	0.498722	-0.211318	0.272825	-1.93712	3.11876e-06	0.173113	0.972419	-1.55269	0.00231226	-1.72581	0.000391135
miR167-y	218.325	146.313	76.1988	168.532	28.7297	151.843	-0.577422	0.216757	-1.51864	0.0251491	-0.373452	0.414819	-2.92586	7.76354e-05	-0.523893	0.576633	-0.0535299	0.671441	-0.994743	0.0586177	0.15044	0.978439	-2.40197	0.00040492	-0.941213	0.0218784	0.20397	0.535664	-2.34844	3.22281e-07	1.14518	0.00757087	-1.40723	0.0104667	-2.55241	3.15162e-07
miR169-x	2.70773	2.51917	0.802	4.93023	1.1714	2.95137	-0.104139	1	-1.75541	0.069847	0.86457	0.132945	-1.20885	0.374429	0.124298	0.829682	-0.228437	0.81469	-1.87971	0.037286	0.740273	0.237884	-1.33315	0.318417	-1.65127	0.0439823	0.968709	0.0310149	-1.10471	0.358231	2.61998	9.68596e-05	0.54656	0.486483	-2.07342	0.00776407
miR169-y	1.72543	0.909933	0.4539	2.11327	2.65397	1.10093	-0.923126	0.326112	-1.92651	0.114968	0.292516	0.68206	0.621192	0.210451	-0.652606	0.592669	-0.27052	1	-1.27391	0.43043	0.945122	0.344497	1.2738	0.10778	-1.00339	0.473933	1.21564	0.0868896	1.54432	0.025445	2.21903	0.0166679	2.5477	0.00902161	0.328675	0.253616
miR169-z	0.264867	0.660633	0.1884	1.35797	0.365267	1.80063	1.35536	0.45496	-0.506666	1	2.39489	0.101421	0.500461	0.697717	2.80194	0.0161278	-1.44658	0.105074	-3.30861	0.0147787	-0.407056	0.702438	-2.30148	0.139526	-1.86203	0.4556	1.03953	0.314114	-0.8549	0.853011	2.90155	0.0473408	1.00713	0.695596	-1.89443	0.259099
miR171-x	3.67943	1.39497	4.17213	1.22047	1.6182	3.36947	-1.39925	0.0663811	0.181302	0.546904	-1.59205	0.0379573	-1.18509	0.433558	-0.126963	0.870702	-1.27229	0.0699685	0.308265	0.7825	-1.46509	0.0389729	-1.05813	0.374771	1.58055	0.00459547	-0.192798	0.889488	0.214159	0.304838	-1.77335	0.00185309	-1.3664	0.098864	0.406957	0.233432
miR171-y	530.498	739.557	328.53	1219.84	1778.04	2080.6	0.479314	0.212094	-0.691323	0.353478	1.20128	0.00895263	1.74487	5.38319e-05	1.97158	0.000470142	-1.49227	6.03303e-05	-2.6629	9.63085e-07	-0.770303	0.0403377	-0.226714	0.602375	-1.17064	0.00147042	0.721963	0.00597681	1.26555	1.45568e-08	1.8926	4.95496e-06	2.43619	2.32525e-08	0.543589	0.00223572
miR172-y	24.465	27.9357	16.5962	24.12	5.85677	16.7844	0.191393	0.584829	-0.559861	0.526874	-0.0204894	1	-2.06254	0.00358784	-0.543596	0.626952	0.734989	0.193026	-0.0162651	0.981575	0.523107	0.508761	-1.51894	0.065509	-0.751254	0.270833	-0.211882	0.450063	-2.25393	1.16638e-05	0.539372	0.520479	-1.50268	0.04841	-2.04205	0.0014142
miR1858-x	0.5838	1.18073	1.9107	1.8289	1.46443	0.4483	1.03271	0.461422	1.72712	0.136214	1.664	0.182414	1.34337	0.172742	-0.36444	0.856774	1.39715	0.199178	2.09156	0.0305253	2.02844	0.0478655	1.70781	0.0444345	0.694418	0.207735	0.631293	0.43322	0.310659	0.279546	-0.0631251	0.711214	-0.383759	0.872164	-0.320634	0.784435
miR2092-x	0.0864333	0.644367	1.0004	0.495567	3.2519	1.21103	3.01402	0.122725	3.64865	0.0365711	2.62548	0.365436	5.34935	4.32394e-05	3.92431	0.028813	-0.910285	0.385986	-0.275662	1	-1.29882	0.237385	1.42504	0.0269259	0.634623	0.477321	-0.38854	0.852374	2.33533	0.000576472	-1.02316	0.346519	1.70071	0.039342	2.72387	0.00123464
miR2118-x	0.1788	1.24057	1.52103	1.82863	0.614467	1.00603	2.84552	0.0872899	3.14029	0.0632986	3.40917	0.0234186	1.82796	0.32849	2.54229	0.293659	0.303228	0.699785	0.597997	0.557604	0.866876	0.507969	-0.714331	1	0.294769	0.718532	0.563648	0.745644	-1.01756	0.648349	0.268879	1	-1.31233	0.457589	-1.58121	0.334832
miR2118-y	2.8309	1.0436	6.9386	1.07513	3.8472	9.11417	-1.44261	0.294665	1.29508	0.269234	-1.39505	0.239418	0.444248	0.512863	1.68855	0.274106	-3.13116	0.0113616	-0.393466	0.919924	-3.0836	0.00600727	-1.2443	0.567813	2.73769	0.00528787	0.0475622	1	1.88686	0.0275844	-2.69013	0.0028505	-0.850836	0.591118	1.83929	0.0151802
miR2218-y	2.49293	0.9202	4.65527	0.695967	3.5121	8.76853	-1.44113	0.34246	0.901916	0.514187	-1.84575	0.201344	0.49505	0.593812	1.81587	0.290247	-3.257	0.0147339	-0.913957	0.652913	-3.66162	0.00764844	-1.32082	0.605535	2.34305	0.0534774	-0.40462	0.790028	1.93618	0.0693155	-2.74767	0.027451	-0.406866	0.93314	2.3408	0.0426469
miR2275-x	0.01	0.472133	0.148967	0.227767	0.879533	0.971433	5.56112	0.0860908	3.86427	0.571861	4.48822	0.389215	6.45867	0.00928192	6.59708	0.05994	-1.03596	0.575212	-2.73282	0.250487	-2.10887	0.215151	-0.138418	0.802758	-1.69685	0.405129	-1.07291	0.582621	0.897544	0.27329	0.623946	1	2.5944	0.0558271	1.97045	0.036596
miR2916-x	7.1317	2.2047	3.42787	1.88397	7.24593	12.0797	-1.69366	0.0854744	-1.05694	0.5372	-1.92047	0.0464081	0.0229255	0.608165	0.760271	0.351982	-2.45393	2.08753e-05	-1.81721	0.0304888	-2.68074	4.31852e-06	-0.737345	0.679114	0.636729	0.289731	-0.226809	0.77769	1.71659	0.0165207	-0.863538	0.21213	1.07986	0.257776	1.9434	0.0087164
miR319-x	13.318	10.3668	6.6614	15.2093	3.8505	23.1358	-0.361403	0.456344	-0.999477	0.176596	0.191577	0.835066	-1.79026	0.0370875	0.796755	0.136648	-1.15816	0.00564321	-1.79623	0.00358601	-0.605178	0.215668	-2.58701	0.000737177	-0.638073	0.321924	0.55298	0.345641	-1.42885	0.0394062	1.19105	0.107552	-0.79078	0.338347	-1.98183	0.0215058
miR3630-y	13.4821	14.1585	13.0565	13.9348	5.52223	12.9462	0.0706198	0.833405	-0.0462807	0.687671	0.0476471	0.921923	-1.28772	0.142776	-0.0585128	0.921933	0.129133	0.880854	0.0122321	0.871786	0.10616	0.983296	-1.22921	0.178999	-0.116901	0.798951	-0.0229727	0.903776	-1.35834	0.035179	0.0939278	0.855332	-1.24144	0.0593108	-1.33537	0.088203
miR3711-x	0.248933	0.602267	0.148967	0.01	0.5156	0.2993	1.28608	0.550879	-0.75397	1	-4.61824	0.380296	1.06994	0.419746	0.269124	1	1.01696	0.832148	-1.02309	1	-4.88736	0.365755	0.800818	0.478064	-2.04005	0.388892	-5.90432	0.0838163	-0.216143	0.872625	-3.86427	0.570976	1.82391	0.270917	5.68818	0.0435704
miR390-y	45.1982	33.3788	28.3988	30.959	11.9222	49.0791	-0.437332	0.270544	-0.670434	0.425028	-0.545907	0.211498	-1.92261	0.00701239	0.118844	0.61248	-0.556176	0.0884571	-0.789278	0.139318	-0.66475	0.0510573	-2.04146	0.00286053	-0.233102	0.966292	-0.108575	0.526789	-1.48528	0.00864806	0.124527	0.833254	-1.25218	0.0381711	-1.37671	0.0381534
miR391-x	5.3527	2.8078	3.4351	2.34047	1.40007	1.93503	-0.930827	0.0760271	-0.639915	0.525243	-1.19347	0.0836577	-1.93477	0.0421966	-1.4704	0.0750932	0.539569	0.482818	0.830481	0.355305	0.276925	0.843355	-0.464376	0.884367	0.290912	0.521692	-0.262644	0.5752	-1.00394	0.448351	-0.553556	0.412769	-1.29486	0.248591	-0.741301	0.829184
miR393-x	225.245	251.701	148.443	162.524	74.92	176.781	0.160214	0.580175	-0.601589	0.499667	-0.47084	0.217682	-1.58807	0.0279338	-0.349533	0.857146	0.509747	0.421093	-0.252056	0.645911	-0.121307	0.494804	-1.23854	0.119927	-0.761802	0.0850037	-0.631054	0.00210554	-1.74829	0.000304878	0.130748	0.854198	-0.986485	0.0826188	-1.11723	0.119658
miR393-y	4.46437	2.84473	1.18997	3.077	3.2153	1.55333	-0.650162	0.325765	-1.90753	0.0552157	-0.536931	0.432946	-0.473502	1	-1.52309	0.110846	0.872926	0.239337	-0.384446	0.821854	0.986157	0.230436	1.04959	0.0452427	-1.25737	0.127969	0.113231	0.927526	0.17666	0.174296	1.3706	0.0883071	1.43403	0.0231052	0.0634289	0.295926
miR395-y	27.2377	18.8771	29.1153	43.325	1.77907	44.8593	-0.52897	0.177278	0.0961709	0.710373	0.669594	0.129408	-3.93641	5.69416e-08	0.719803	0.124804	-1.24877	0.0012801	-0.623632	0.427722	-0.0502095	0.766602	-4.65622	1.76574e-09	0.625141	0.172435	1.19856	0.0005554	-3.40744	3.30888e-09	0.573423	0.483757	-4.03258	9.19962e-06	-4.60601	1.67722e-12
miR397-x	3.3333	2.14207	7.4756	4.12957	6.2796	2.21507	-0.637948	0.39951	1.16524	0.018201	0.309039	0.601775	0.913721	0.0270422	-0.589601	0.75504	-0.0483467	0.87681	1.75484	0.0151054	0.89864	0.310985	1.50332	0.0132962	1.80319	0.000129773	0.946987	0.0563938	1.55167	0.000470726	-0.856199	0.0292734	-0.251517	0.959276	0.604682	0.0277357
miR398-x	14.5385	27.7049	22.6717	55.1137	6.80747	19.1719	0.930261	0.0242793	0.641014	0.209146	1.92253	0.000666178	-1.09469	0.445986	0.399117	0.478265	0.531144	0.233588	0.241897	0.608141	1.52342	0.0132228	-1.49381	0.149307	-0.289247	0.849472	0.992272	0.0231177	-2.02495	0.00854119	1.28152	0.0688679	-1.7357	0.0353074	-3.01722	0.000273401
miR398-y	78.7361	48.5403	77.4895	59.6466	78.5026	24.8352	-0.697844	0.0668172	-0.0230257	0.731986	-0.400586	0.311482	-0.00428543	0.332412	-1.66464	0.00983429	0.966798	0.0383647	1.64162	0.00251354	1.26406	0.00948135	1.66036	0.000128294	0.674818	0.019746	0.297258	0.311888	0.693558	0.000756433	-0.37756	0.161196	0.0187402	0.633759	0.396301	0.0152877
miR399-y	15.3021	29.261	37.3353	56.8364	55.8315	40.729	0.935248	0.0352162	1.28681	0.0111602	1.89308	0.000106818	1.86735	5.94146e-05	1.41232	0.00897912	-0.477077	0.136107	-0.125519	0.849725	0.480758	0.480324	0.455021	0.10581	0.351558	0.16129	0.957834	0.000364227	0.932098	0.000103475	0.606276	0.318828	0.580539	0.114122	-0.0257367	0.206729
miR403-y	0.255233	0.4533	7.61727	0.0793333	0.192067	0.835267	0.847615	0.807056	4.91772	0.00377237	-1.79349	0.731548	-0.44221	1	1.72362	0.305143	-0.876002	0.613412	3.1941	0.042467	-3.5171	0.179969	-2.16583	0.365751	4.0701	0.00344249	-2.6411	0.339505	-1.28982	0.822968	-6.7112	0.000501725	-5.35993	0.00582562	1.35128	0.788943
miR408-x	27.9299	15.8272	12.8358	30.2497	5.44913	4.92703	-0.819403	0.0577395	-1.12163	0.072194	0.115111	0.801504	-2.35771	0.00117629	-2.50302	0.00182217	1.68361	0.0102883	1.38139	0.0449927	2.61813	6.36951e-05	0.145308	0.483405	-0.302229	0.811975	0.934513	0.00947102	-1.53831	0.0303919	1.23674	0.0109498	-1.23608	0.0794427	-2.47282	6.81858e-05
miR408-y	20.6484	12.5595	12.335	31.6098	8.29643	14.3618	-0.717247	0.0735175	-0.743276	0.31013	0.614342	0.194763	-1.31547	0.114992	-0.52379	0.518529	-0.193457	0.526256	-0.219486	0.765881	1.13813	0.0374303	-0.791677	0.56517	-0.026029	0.695682	1.33159	0.000484833	-0.59822	0.787994	1.35762	0.0161053	-0.572191	0.543739	-1.92981	0.00408602
miR473-x	0.01	0.426733	0.01	0.2342	1.16437	0.370667	5.41526	0.131086	0	1	4.52899	0.389516	6.8634	0.0019558	5.19902	0.381056	0.216245	1	-5.19902	0.258765	-0.67003	0.766264	1.66438	0.0384445	-5.41526	0.124073	-0.886275	0.776124	1.44814	0.0492544	4.52899	0.372388	6.8634	0.00135839	2.33441	0.0251355
miR477-x	5.33767	32.2761	5.69757	93.2548	256.066	155.414	2.59619	3.37649e-08	0.0941367	0.733605	4.1269	5.65377e-14	5.58416	3.96589e-19	4.86376	2.45673e-13	-2.26758	6.02518e-10	-4.76963	7.78522e-11	-0.736865	0.0378779	0.720401	0.0138974	-2.50205	2.40202e-05	1.53071	7.3743e-08	2.98798	1.19792e-21	4.03276	4.92334e-10	5.49003	4.87565e-15	1.45727	3.98372e-07
miR479-x	12.9579	48.4696	11.8659	99.8835	131.606	265.436	1.90325	2.27914e-06	-0.127007	0.896894	2.94642	5.66283e-12	3.34432	1.41823e-11	4.35647	1.61827e-10	-2.45322	2.88988e-07	-4.48347	1.56562e-10	-1.41005	0.00253028	-1.01215	0.399789	-2.03026	5.70138e-06	1.04317	4.13546e-05	1.44107	2.28365e-08	3.07342	2.17802e-11	3.47133	3.02588e-11	0.397903	0.0136184
miR482-y	3.24737	1.7009	7.90943	1.92573	3.7559	9.5625	-0.932972	0.322653	1.2843	0.189668	-0.753862	0.410828	0.208607	0.652904	1.55812	0.210611	-2.49109	0.015439	-0.273814	0.989201	-2.31198	0.0210327	-1.34951	0.552742	2.21728	0.00755335	0.17911	0.816039	1.14158	0.144766	-2.03817	0.0134067	-1.0757	0.535177	0.96247	0.220508
miR5021-x	1.01183	0.4592	1.5249	2.19227	1.37323	1.83017	-1.15029	0.34343	0.591743	0.416101	1.11545	0.146717	0.440605	0.334314	0.855003	0.435407	-2.00529	0.0737983	-0.26326	1	0.260448	0.840211	-0.414398	0.926592	1.74203	0.0630253	2.26574	0.00379429	1.59089	0.0199865	0.523709	0.731949	-0.151138	1	-0.674847	0.842423
miR5048-x	0.814667	0.01	0.602133	0.01	0.7768	1.30233	-6.33628	0.158048	-0.440335	1	-6.33628	0.150136	-0.0692471	0.804869	0.681267	0.580291	-7.01755	0.0181903	-1.1216	0.533429	-7.01755	0.0223266	-0.750514	0.784739	5.89595	0.168466	0	1	6.26704	0.0566958	-5.89595	0.189411	0.371087	0.829084	6.26704	0.0660465
miR5049-y	2.74137	0.8003	0.741433	1.56597	0.201733	1.0262	-1.77628	0.0202523	-1.88651	0.0609647	-0.807842	0.25555	-3.78841	0.00197204	-1.41758	0.144953	-0.358699	0.736341	-0.468923	0.883785	0.609742	0.590033	-2.37083	0.232978	-0.110224	1	0.968441	0.232985	-2.01213	0.43904	1.07866	0.286276	-1.9019	0.234778	-2.98057	0.0524162
miR5051-y	0.01	0.231267	0.01	0.01	1.4069	0.01	4.51054	0.368298	0	1	0	1	7.12952	0.0232327	0	1	4.51054	0.345598	0	1	0	1	7.12952	0.0303913	-4.51054	0.350487	-4.51054	0.351224	2.61898	0.0873031	0	1	7.12952	0.0319925	7.12952	0.0150208
miR5059-x	35.5833	14.3668	13.862	16.185	11.5493	22.4506	-1.30846	0.0172709	-1.36006	0.0600349	-1.13654	0.0297797	-1.62339	0.072439	-0.66445	0.311995	-0.644013	0.230936	-0.695613	0.294238	-0.472092	0.245648	-0.958942	0.430044	-0.0515999	0.739561	0.171922	0.754693	-0.314929	0.701666	0.223521	0.968062	-0.263329	0.910655	-0.486851	0.902714
miR5078-y	36.2344	1.467	29.7581	1.91273	59.0723	30.7526	-4.62642	0.00193651	-0.284078	0.947712	-4.24365	0.00411543	0.705124	0.442089	-0.236649	0.901895	-4.38977	0.00141568	-0.0474292	0.906024	-4.007	0.00305335	0.941773	0.543397	4.34234	0.000513686	0.382767	0.763487	5.33154	0.000102005	-3.95957	0.00111666	0.989202	0.468878	4.94877	0.000260887
miR5139-x	115.635	125.581	98.1728	149.695	53.698	79.8545	0.119038	0.744373	-0.236181	0.971876	0.372447	0.417417	-1.10664	0.346578	-0.534131	0.43815	0.653169	0.157664	0.29795	0.474759	0.906577	0.0936472	-0.572506	0.950699	-0.355219	0.68494	0.253409	0.351756	-1.22567	0.0460665	0.608628	0.310953	-0.870455	0.223262	-1.47908	0.0125544
miR5179-x	1.4294	0.6469	0.249	0.4585	32.984	0.408633	-1.1438	0.317576	-2.56034	0.0895162	-1.65094	0.142395	4.52829	3.64978e-13	-1.83026	0.111252	0.686467	0.685353	-0.730083	1	0.179319	1	6.35855	1.30701e-14	-1.41655	0.412813	-0.507148	0.673199	5.67208	2.7708e-26	0.909402	0.848407	7.08863	1.02986e-16	6.17923	6.94899e-24
miR5298-y	1.44843	0.729967	2.15997	0.7958	0.670867	2.58833	-0.995194	0.330581	0.576516	0.359329	-0.864015	0.428361	-1.1104	0.571624	0.83753	0.344406	-1.83272	0.0473286	-0.261014	0.87888	-1.70155	0.0374564	-1.94793	0.137936	1.57171	0.0345158	0.131178	1	-0.115201	0.888749	-1.44053	0.0286232	-1.68691	0.107517	-0.24638	0.880809
miR530-x	58.2151	29.1558	25.164	13.3749	10.0195	24.1197	-0.997611	0.00652259	-1.21003	0.045533	-2.12187	8.06651e-07	-2.53858	8.17305e-05	-1.27118	0.0268113	0.273573	0.517315	0.0611494	0.783352	-0.850682	0.034763	-1.26739	0.162005	-0.212424	0.983114	-1.12425	9.49429e-06	-1.54097	0.00612509	-0.911831	0.0128121	-1.32854	0.0379588	-0.416713	0.824265
miR535-x	3470.4	3363.39	2953.08	2286.94	4077.91	4839.58	-0.0451867	0.960785	-0.23288	0.970656	-0.601685	0.106649	0.232727	0.115008	0.479781	0.211885	-0.524968	0.113106	-0.712661	0.167277	-1.08147	0.00269539	-0.247054	0.707873	-0.187694	0.939857	-0.556499	0.0086988	0.277914	0.012938	-0.368805	0.0953609	0.465608	0.122055	0.834413	0.000103658
miR5368-y	30.1973	17.7075	14.8759	26.3541	37.2071	14.0646	-0.77006	0.161608	-1.02144	0.224882	-0.196389	0.77428	0.301161	0.287673	-1.10235	0.119838	0.332286	0.504419	0.0809018	0.748001	0.905957	0.220556	1.40351	0.0174594	-0.251384	0.927369	0.573671	0.36175	1.07122	0.0201682	0.825056	0.334141	1.32261	0.0401017	0.49755	0.179957
miR5523-y	0.5932	1.053	0.6104	0.492367	0.01	0.768167	0.836045	0.575148	0.0414661	0.789349	-0.260656	1	-5.88232	0.154617	0.374757	0.881694	0.461288	0.674796	-0.33329	1	-0.635412	0.709041	-6.25707	0.109031	-0.794579	0.715949	-1.0967	0.321186	-6.71836	0.00838849	-0.302122	0.868117	-5.92378	0.105311	-5.62166	0.104644
miR5532-y	1.08093	0.604033	0.741433	1.14297	0.0684667	0.380267	-0.847561	0.598158	-0.543889	0.896318	0.0805058	1	-4.12853	0.0543335	-1.5199	0.421017	0.672335	1	0.976008	0.573328	1.6004	0.331338	-2.60863	0.552055	0.303672	0.754886	0.928067	0.420448	-3.28097	0.357337	0.624394	0.78351	-3.58464	0.065267	-4.20903	0.0350434
miR5777-y	1.02853	0.348767	0.1697	0.109933	0.01	0.408633	-1.56025	0.242248	-2.62815	0.145181	-3.31614	0.0561413	-6.68444	0.0277023	-1.35544	0.315886	-0.204814	1	-1.27271	0.820698	-1.9607	0.64349	-5.329	0.443706	-1.0679	0.748757	-1.75589	0.474539	-5.12419	0.21484	-0.687992	1	-4.05629	0.592116	-3.3683	1
miR6293-x	0.0927333	0.01	0.169267	0.01	1.85987	0.01	-3.10545	1	0.917801	1	-3.10545	1	4.4336	0.000386871	-3.10545	1	0	1	4.02326	0.718807	0	1	7.53906	9.14023e-05	4.02326	0.67652	0	1	7.53906	5.50991e-06	-4.02326	0.701922	3.5158	0.0014781	7.53906	8.2998e-06
miR6300-y	0.509167	0.716333	1.39217	1.79687	0.895967	2.13117	0.501969	0.857539	1.4606	0.21241	1.82875	0.0612665	0.824783	0.334735	2.07491	0.0375706	-1.57294	0.0323729	-0.614311	0.5439	-0.24616	0.67791	-1.25013	0.386441	0.958629	0.251322	1.32678	0.0642344	0.322814	0.374159	0.368151	0.924009	-0.635815	0.702657	-1.00397	0.562789
miR7492-y	0.521767	0.01	0.01	0.7168	0.01	0.168633	-5.69609	0.151905	-5.69609	0.173986	0.467412	0.859254	-5.69609	0.18023	-1.67846	0.651787	-4.01763	0.661447	-4.01763	0.678218	2.14587	0.2384	-4.01763	0.716217	0	1	6.1635	0.0165925	0	1	6.1635	0.031079	0	1	-6.1635	0.0389296
miR7501-y	0.01	0.01	0.0917333	0.01	0.7222	0.01	0	1	3.08859	1	0	1	6.17433	0.0186986	0	1	0	1	3.08859	1	0	1	6.17433	0.0166175	3.08859	1	0	1	6.17433	0.0108994	-3.08859	1	3.08573	0.06564	6.17433	0.012203
miR7723-x	0.361033	1.191	0.538967	0.3165	0.341733	11.5416	1.71793	0.248797	0.578064	0.672191	-0.22064	1	-0.0934025	0.847266	4.99857	2.12251e-08	-3.28064	3.79409e-06	-4.4205	5.18143e-08	-5.21921	2.42968e-10	-5.09197	5.28349e-07	-1.13986	0.55298	-1.93857	0.253958	-1.81133	0.493089	-0.798704	0.542008	-0.671466	0.859632	0.127237	0.880293
miR7732-x	5.94047	7.1109	11.0352	8.45413	5.76637	13.1333	0.259456	0.555947	0.893465	0.043892	0.509081	0.262004	-0.0429137	0.424356	1.14458	0.0275623	-0.885122	0.0617456	-0.251113	0.764748	-0.635497	0.0851794	-1.18749	0.215181	0.634009	0.0595988	0.249625	0.626971	-0.30237	0.693787	-0.384384	0.178978	-0.936378	0.178579	-0.551994	1
miR7757-x	1.50723	0.01	1.19763	0.01	1.05683	1.86917	-7.22936	0.0359571	-0.333374	1	-7.22936	0.0330365	-0.514889	0.966854	0.311733	0.700871	-7.5411	0.0078811	-0.645107	0.672392	-7.5411	0.00828803	-0.826622	0.723605	6.89599	0.0296836	0	1	6.71447	0.0297213	-6.89599	0.0359154	-0.181515	1	6.71447	0.032839
miR7760-x	1.3918	0.01	0.0917333	0.01	0.1317	0.01	-7.11388	0.0467559	-4.02529	0.124148	-7.11388	0.0417019	-3.43168	0.187569	-7.11388	0.0631372	0	1	3.08859	1	0	1	3.6822	0.575186	3.08859	1	0	1	3.6822	0.588406	-3.08859	1	0.593605	1	3.6822	0.605216
miR8122-y	0.0864333	0.856	0.261867	0.400367	0.0650333	0.691233	3.42375	0.0516794	1.67777	0.659177	2.32746	0.354262	-0.450641	1	3.11531	0.132767	0.308438	1	-1.43754	0.445622	-0.787851	0.501324	-3.56596	0.130917	-1.74598	0.362233	-1.09629	0.297888	-3.87439	0.048863	0.649694	1	-2.12841	0.668504	-2.77811	0.349595
miR8154-x	0.799667	0.6469	0.326967	0.9703	0.931067	2.1562	-0.305856	1	-1.30504	0.50067	0.279032	0.889751	0.219486	0.609028	1.43102	0.13675	-1.73688	0.0493447	-2.73606	0.0245437	-1.15199	0.176159	-1.21153	0.470952	-0.999183	0.698112	0.584888	0.61786	0.525342	0.306926	1.58407	0.260549	1.52452	0.134949	-0.0595464	0.697171
miR8155-y	94.3454	106.664	86.7455	126.133	44.6068	71.5777	0.177054	0.667682	-0.121163	0.884791	0.41892	0.383709	-1.08069	0.382831	-0.398442	0.57942	0.575496	0.207176	0.277279	0.499322	0.817362	0.126679	-0.682246	0.916209	-0.298217	0.801647	0.241866	0.397048	-1.25774	0.0445441	0.540083	0.400697	-0.959525	0.174196	-1.49961	0.011724
miR827-x	14.8748	24.3435	14.0564	15.6777	8.66443	5.81403	0.710664	0.142122	-0.0816465	0.786082	0.0758467	0.806188	-0.779693	0.685531	-1.35526	0.184048	2.06592	0.000680835	1.27361	0.0723387	1.43111	0.0497756	0.575566	0.169189	-0.792311	0.100212	-0.634818	0.0190945	-1.49036	0.0120703	0.157493	0.941219	-0.698046	0.365945	-0.85554	0.442111
miR827-y	965.944	1500.42	878.842	876.631	472.572	482.108	0.635355	0.0744489	-0.136335	0.872554	-0.139969	0.814332	-1.03141	0.315942	-1.00258	0.302983	1.63794	0.00959983	0.866249	0.211455	0.862615	0.267472	-0.0288214	0.534622	-0.771689	0.107018	-0.775323	0.000324988	-1.66676	0.000289466	-0.00363401	0.628799	-0.89507	0.170264	-0.891436	0.312188
miR845-x	3.96313	3.3083	2.33633	2.68963	0.9379	3.14127	-0.260551	0.64361	-0.762395	0.430849	-0.559232	0.393745	-2.07914	0.0353192	-0.335295	0.762116	0.0747436	1	-0.4271	0.629707	-0.223937	0.638366	-1.74384	0.0969879	-0.501844	0.704662	-0.298681	0.524971	-1.81858	0.0462699	0.203163	1	-1.31674	0.180036	-1.5199	0.136974
miR845-z	0.521767	0.01	0.514467	0.01	0.0650333	0.140667	-5.69609	0.151553	-0.0110809	1	-5.69609	0.16373	-3.15094	0.359425	-1.95193	0.416	-3.74416	1	1.94084	0.214483	-3.74416	1	-1.19902	1	5.68501	0.0428799	0	1	2.54514	1	-5.68501	0.0448815	-3.13986	0.177236	2.54514	1
miR8577-x	1.07467	0.556067	0.974633	1.43363	0.01	0.486267	-0.950559	0.433857	-0.140958	1	0.415787	0.714625	-6.74775	0.0152507	-1.15399	0.410253	0.203434	1	1.01304	0.393077	1.56978	0.173581	-5.59375	0.214247	0.809602	0.442688	1.36635	0.145058	-5.79719	0.113427	0.556745	0.749881	-6.60679	0.0182171	-7.16353	0.00185981
miR858-x	1.11247	0.5664	0.2058	0.0793333	0.192067	1.35227	-0.973869	0.423836	-2.45801	0.089633	-3.93632	0.0329165	-2.58505	0.204956	0.281618	0.734107	-1.25549	0.220104	-2.73962	0.0442654	-4.21794	0.0129128	-2.86667	0.0763552	-1.48414	0.470465	-2.96246	0.120867	-1.61118	0.518293	-1.47832	0.720079	-0.127043	1	1.35128	0.788188
miR8590-y	0.01	0.220967	0.01	0.4813	0.825933	0.01	4.44383	0.374396	0	1	5.56874	0.308275	6.36795	0.00819097	0	1	4.44383	0.570744	0	1	5.56874	0.305999	6.36795	0.00615959	-4.44383	0.362085	1.12491	0.708747	1.92413	0.0649182	5.56874	0.265952	6.36795	0.00681918	0.799212	0.283824
miR8663-x	0.01	0.706033	0.2265	0.224667	0.0650333	0.2993	6.14166	0.033163	4.48005	0.376319	4.44626	0.535714	2.54514	1	4.88736	0.389917	1.2543	0.499898	-0.407313	1	-0.441107	1	-2.34222	0.726843	-1.66161	0.270485	-1.69541	0.273111	-3.59652	0.105885	-0.0337934	1	-1.9349	0.73922	-1.90111	0.791328
miR869-y	0.437867	0.592967	0.266367	1.3188	0.01	0.656667	0.448484	0.845385	-0.724221	0.832072	1.60169	0.18857	-5.44139	0.235056	0.595694	0.566315	-0.14721	0.832986	-1.31992	0.387028	1.00599	0.541925	-6.03709	0.0576831	-1.17271	0.667827	1.1532	0.240049	-5.88988	0.0538958	2.32591	0.118107	-4.71717	0.282891	-7.04308	0.00367776
miR9478-y	24.457	28.7476	35.8799	54.0948	21.6805	61.4142	0.233196	0.57371	0.552927	0.233456	1.14524	0.0129832	-0.173852	0.573978	1.32832	0.0501761	-1.09513	0.103258	-0.775397	0.394953	-0.183082	0.720782	-1.50218	0.240266	0.319731	0.355455	0.912047	0.0138132	-0.407047	0.937968	0.592315	0.464858	-0.726779	0.432521	-1.31909	0.0793116
miR9566-y	0.01	0.01	0.01	0.01	2.51547	0.01	0	1	0	1	0	1	7.97468	9.45219e-06	0	1	0	1	0	1	0	1	7.97468	1.17629e-05	0	1	0	1	7.97468	2.28128e-07	0	1	7.97468	6.39977e-06	7.97468	7.07741e-07
miR9669-x	1.16097	0.01	0.148967	0.01	0.706767	1.22133	-6.85087	0.073665	-2.98661	0.244745	-6.85087	0.0696702	-0.721385	1	0.0735422	0.828212	-6.92442	0.0228208	-3.06015	0.135033	-6.92442	0.0258369	-0.794928	0.769839	3.86427	0.552704	0	1	6.12949	0.0751748	-3.86427	0.569559	2.26522	0.316736	6.12949	0.0823394
miR9672-y	1.04553	0.01	0.432	0.01	0.636767	1.0594	-6.69887	0.0879277	-1.28834	0.761649	-6.69887	0.0978186	-0.721358	1	0.0191295	0.85998	-6.718	0.0296551	-1.30747	0.480877	-6.718	0.0373346	-0.740487	0.793252	5.41052	0.258329	0	1	5.97751	0.0930012	-5.41052	0.294123	0.566987	0.801942	5.97751	0.0953717
miR9674-x	3.7004	0.01	3.1542	0.01	2.7371	7.6996	-8.52894	0.00403464	-0.230858	0.937019	-8.52894	0.00388725	-0.43595	0.939294	1.05845	0.470592	-9.58739	0.000456265	-1.28931	0.483835	-9.58739	0.000546937	-1.4944	0.507328	8.29808	0.00277287	0	1	8.09299	0.00280813	-8.29808	0.00327788	-0.205092	0.986623	8.09299	0.00305866
miR9751-x	1.34747	0.298933	0.6104	0.179267	0.376933	0.5293	-2.18853	0.113594	-1.15032	0.631397	-2.93715	0.0487481	-1.83787	0.327662	-1.34809	0.400788	-0.840439	0.609738	0.197769	1	-1.58906	0.37711	-0.489776	1	1.03821	0.514114	-0.748617	0.765181	0.350663	0.631549	-1.78683	0.319236	-0.687546	0.875583	1.09928	0.415498
miR9776-x	0.699233	0.01	0.517067	0.01	0.566767	1.59493	-6.11388	0.188748	-0.440325	1	-6.11388	0.200185	-0.306269	0.940716	1.20045	0.357947	-7.31433	0.00685377	-1.64078	0.311667	-7.31433	0.00756387	-1.50672	0.455123	5.67356	0.204036	0	1	5.80761	0.114715	-5.67356	0.23162	0.134056	0.934015	5.80761	0.129331
miR9863-y	5.3164	0.01	3.66463	0.01	3.71727	11.1817	-9.0525	0.00167666	-0.537597	0.962068	-9.0525	0.00178877	-0.516987	0.974825	1.07356	0.486413	-10.1261	0.000300875	-1.61116	0.405928	-10.1261	0.000373785	-1.59055	0.497052	8.5149	0.00209319	0	1	8.53551	0.00152093	-8.5149	0.00226212	0.0206106	0.958477	8.53551	0.00174826
novel-m0007-5p	2.26507	1.87563	0.857233	0.644133	0.3089	0.274633	-0.272176	0.802269	-1.40179	0.283111	-1.81412	0.0631181	-2.88999	0.0425523	-3.07943	0.0172001	2.80725	0.0109522	1.67763	0.311951	1.26531	0.511545	0.189434	0.811665	-1.12962	0.327825	-1.54195	0.0355363	-2.61782	0.0310431	-0.412329	0.680611	-1.4882	0.416349	-1.07587	0.850602
novel-m0010-5p	18.7274	22.2751	18.4815	19.8189	47.9529	12.096	0.250286	0.527861	-0.0190662	0.69039	0.0817313	0.898307	1.35647	0.00135895	-0.630622	0.399034	0.880908	0.0445735	0.611556	0.186425	0.712353	0.179555	1.98709	1.09861e-05	-0.269352	0.880965	-0.168555	0.490433	1.10619	0.000313976	0.100797	0.851809	1.37554	0.00201434	1.27474	0.000128776
novel-m0011-5p	18.7274	22.2751	18.4815	19.8189	47.9529	12.096	0.250286	0.527819	-0.0190662	0.690823	0.0817313	0.898292	1.35647	0.00137224	-0.630622	0.39605	0.880908	0.0448413	0.611556	0.186734	0.712353	0.179926	1.98709	1.11711e-05	-0.269352	0.880859	-0.168555	0.489889	1.10619	0.000317936	0.100797	0.851429	1.37554	0.00203044	1.27474	0.000126748
novel-m0012-5p	1.40003	1.18333	0.01	1.32993	0.614467	0.404167	-0.242605	0.814453	-7.12932	0.00343062	-0.0741072	1	-1.1959	0.578127	-1.81643	0.182431	1.57383	0.281621	-5.31288	0.38766	1.74233	0.268141	0.620532	0.658087	-6.88671	0.00821021	0.168497	1	-0.953297	0.825978	7.05521	0.00883181	5.93342	0.0738241	-1.12179	0.613864
novel-m0013-5p	2.5294	1.56203	1.53217	1.1108	0.341733	0.772233	-0.69537	0.317384	-0.723222	0.50583	-1.1872	0.123406	-2.90199	0.0341375	-1.71169	0.125315	1.01632	0.409643	0.988465	0.339134	0.52449	0.75979	-1.19031	0.623779	-0.027852	0.915475	-0.491826	0.560521	-2.20662	0.140898	-0.463974	0.479401	-2.17877	0.0894217	-1.7148	0.392228
novel-m0014-5p	0.3413	1.2073	1.54313	0.2648	0.967333	2.23797	1.83683	0.135304	2.19091	0.0654872	-0.370254	1	1.51713	0.124246	2.72724	0.00818007	-0.890404	0.17999	-0.536326	0.566149	-3.09749	0.000837987	-1.2101	0.361341	0.354079	0.544753	-2.20709	0.0309762	-0.319699	0.908234	-2.56116	0.0164244	-0.673778	0.644861	1.88739	0.0515477
novel-m0017-5p	8.31023	6.94553	8.53607	6.78703	7.61697	14.013	-0.258804	0.590782	0.0386825	0.607837	-0.292108	0.564536	-0.125672	0.481224	0.753808	0.120539	-1.01261	0.0110102	-0.715126	0.280792	-1.04592	0.0113698	-0.879481	0.465247	0.297486	0.299796	-0.0333044	0.874508	0.133131	0.112838	-0.33079	0.327482	-0.164355	0.966111	0.166435	0.128192
novel-m0020-5p	0.1788	0.01	0.49	0.01	0.0650333	0.916233	-4.10545	0.665858	1.50926	0.468195	-4.10545	0.683189	-1.56031	1	2.40693	0.279874	-6.51238	0.0385889	-0.897675	0.744503	-6.51238	0.0487849	-3.96724	0.151344	5.61471	0.0489383	0	1	2.54514	1	-5.61471	0.0550613	-3.06957	0.193757	2.54514	1
novel-m0021-3p	1.21947	1.00937	0.736067	0.770167	0.1317	0.140667	-0.2728	0.903572	-0.728342	0.742484	-0.663008	0.61033	-3.24791	0.0975812	-3.18595	0.0521966	2.91315	0.0352439	2.4576	0.111961	2.52294	0.125472	-0.0619624	1	-0.455542	0.891761	-0.390208	0.877124	-2.97511	0.089827	0.0653342	1	-2.51957	0.180154	-2.5849	0.196286
novel-m0022-3p	3.07933	1.40093	1.0688	1.3224	0.911033	3.55717	-1.13623	0.132941	-1.52663	0.105064	-1.2231	0.14858	-1.75704	0.133408	0.208111	0.645252	-1.34434	0.0595399	-1.73474	0.0264635	-1.43121	0.0542723	-1.96515	0.0478468	-0.390396	0.908137	-0.0868708	0.920903	-0.620813	1	0.303526	1	-0.230416	1	-0.533942	1
novel-m0023-5p	3.54557	4.67053	6.3622	7.9974	5.40257	3.34887	0.397571	0.498242	0.84351	0.212603	1.17351	0.0330908	0.607629	0.158353	-0.0823433	1	0.479914	0.381747	0.925853	0.176718	1.25586	0.0224335	0.689972	0.0903334	0.445938	0.334156	0.775944	0.0433219	0.210058	0.244524	0.330005	0.808152	-0.235881	1	-0.565886	0.90453
novel-m0025-5p	0.0927333	0.130067	0.6962	0.358333	0.674267	0.01	0.519816	1	3.01598	0.111391	2.05778	0.500114	2.96979	0.0884715	-3.10545	1	3.62527	0.702681	6.12143	0.0336311	5.16323	0.196373	6.07525	0.0190257	2.49616	0.129397	1.53796	0.752369	2.44998	0.105401	-0.9582	0.313704	-0.0461825	1	0.912017	0.264478
novel-m0026-5p	12.3611	14.5602	4.10027	12.0049	1.9333	2.3417	0.236216	0.530982	-1.59202	0.0200364	-0.0421836	0.93167	-2.67667	0.00107617	-2.40018	0.00206761	2.6364	1.56399e-06	0.808161	0.27703	2.358	0.000148058	-0.276491	0.882954	-1.82824	0.000312264	-0.278399	0.317822	-2.91289	1.9552e-06	1.54984	0.00620426	-1.08465	0.205872	-2.63449	0.000179212
novel-m0027-5p	1.67303	2.20813	2.0168	3.96607	0.8411	2.24677	0.400361	0.548039	0.269602	0.556568	1.24524	0.0618515	-0.997846	0.617271	0.425384	0.507833	-0.025023	0.847138	-0.155782	0.936025	0.819859	0.288487	-1.42323	0.374494	-0.130759	0.931764	0.844882	0.106175	-1.39821	0.237184	0.975641	0.234324	-1.26745	0.308386	-2.24309	0.0232695
novel-m0030-5p	0.01	0.01	0.01	0.01	0.192067	2.49343	0	1	0	1	0	1	4.21257	0.542736	7.96199	0.000324974	-7.96199	4.94094e-05	-7.96199	0.00023208	-7.96199	5.83459e-05	-3.74942	0.00789034	0	1	0	1	4.21257	0.523659	0	1	4.21257	0.572062	4.21257	0.519918
novel-m0031-5p	1.12827	0.913333	0.774933	0.500567	0.181767	2.16067	-0.300626	0.922255	-0.543914	0.798655	-1.17784	0.512621	-2.68359	0.333602	0.941637	0.461545	-1.24226	0.215899	-1.48555	0.262333	-2.11948	0.0355913	-3.62523	0.0346761	-0.243288	1	-0.877218	0.422666	-2.38296	0.236896	-0.63393	0.68357	-2.13967	0.421591	-1.50574	0.708827
novel-m0032-3p	2.1215	2.41203	1.57793	2.9497	0.2986	1.8949	0.187434	0.838867	-0.42478	0.94836	0.477752	0.526883	-2.84273	0.0881284	-0.160694	1	0.348128	0.643644	-0.264085	1	0.638447	0.400185	-2.68203	0.148658	-0.612214	0.599294	0.290318	0.641151	-3.03016	0.00502046	0.902532	0.348347	-2.41795	0.0823818	-3.32048	0.00215587
novel-m0033-5p	158.616	965.736	449.752	1092.73	180.079	199.356	2.60609	2.68925e-08	1.50359	0.00244802	2.78433	2.61651e-07	0.183095	0.229259	0.329806	0.435885	2.27628	1.87044e-08	1.17378	0.0127087	2.45452	1.70602e-06	-0.146711	0.483122	-1.1025	0.016706	0.178238	0.662932	-2.423	4.0084e-07	1.28074	0.0148838	-1.3205	0.0312445	-2.60123	7.69913e-06
novel-m0034-3p	1.2125	0.689767	1.60433	0.397267	0.550667	14.0711	-0.809833	0.545276	0.407961	0.638664	-1.61799	0.370555	-1.13476	0.661638	3.54065	0.000160484	-4.35049	5.91477e-10	-3.13269	0.000176358	-5.15864	9.08874e-10	-4.67542	9.19654e-07	1.21779	0.124685	-0.808157	0.539061	-0.324929	1	-2.02595	0.0712145	-1.54272	0.237706	0.483228	0.586488
novel-m0036-5p	0.1662	0.344333	1.0974	1.1833	1.55517	0.6342	1.09591	0.789233	2.78216	0.0733958	2.89089	0.0487619	3.28514	0.00492272	1.98348	0.34465	-0.887563	0.70209	0.798682	0.537098	0.907409	0.553172	1.30166	0.0715282	1.68625	0.117509	1.79497	0.0922532	2.18923	0.00403983	0.108726	1	0.50298	0.477326	0.394253	0.285198
novel-m0037-3p	3.6483	3.55753	0.6962	1.28673	0.4188	2.55157	-0.0363471	1	-2.38965	0.0124678	-1.50351	0.0370011	-3.13442	0.00545475	-0.515841	0.591119	0.479494	0.562405	-1.87381	0.0508015	-0.98767	0.134681	-2.61858	0.0402484	-2.3533	0.00683514	-1.46716	0.0180998	-3.09807	0.00384665	0.886139	0.570068	-0.744769	0.77174	-1.63091	0.335945
novel-m0041-3p	0.7221	0.282667	0.0917333	0.971867	0.520367	1.585	-1.37021	0.36076	-3.08553	0.144094	0.42856	0.735382	-0.47267	1	1.13421	0.424702	-2.50442	0.0626177	-4.21975	0.0272107	-0.705653	0.539015	-1.60688	0.399	-1.71532	0.710654	1.79877	0.159474	0.897541	0.294625	3.51409	0.0286855	2.61286	0.143758	-0.90123	0.87981
novel-m0042-3p	2.18943	1.76933	0.3323	1.34813	0.248433	3.02493	-0.307352	0.781068	-2.73454	0.0285875	-0.699594	0.377945	-3.15912	0.0256645	0.466346	0.55905	-0.773697	0.333602	-3.20089	0.00661417	-1.16594	0.140016	-3.62546	0.00910308	-2.42719	0.0334076	-0.392243	0.613651	-2.85176	0.0225192	2.03495	0.0921181	-0.424571	1	-2.45952	0.117243
novel-m0044-5p	3.0332	1.75483	0.489567	0.576333	0.382333	0.757167	-0.789507	0.220341	-2.64112	0.0118716	-2.39587	0.00566858	-3.00057	0.0169556	-2.00852	0.0858463	1.21902	0.343877	-0.632597	0.76952	-0.387342	0.733532	-0.992048	0.666427	-1.85161	0.0865683	-1.60636	0.0259299	-2.21106	0.0689012	0.245255	1	-0.359451	1	-0.604706	1
novel-m0046-5p	0.7158	0.660633	1.04217	1.9485	0.4923	1.3663	-0.115707	1	0.541958	0.595678	1.44474	0.106607	-0.540019	1	0.932646	0.280905	-1.04835	0.239853	-0.390688	0.72113	0.51209	0.734675	-1.47266	0.339651	0.657664	0.480663	1.56044	0.0420131	-0.424312	1	0.902778	0.383109	-1.08198	0.513832	-1.98475	0.0943062
novel-m0047-5p	0.01	1.4275	5.2005	1.41577	0.830733	1.47307	7.15735	0.00170131	9.02251	4.13996e-08	7.14544	0.00167192	6.37631	0.00808968	7.20268	0.00435165	-0.045332	0.855388	1.81983	0.0350233	-0.0572392	0.757587	-0.826365	0.621865	1.86516	0.00073593	-0.0119072	1	-0.781033	0.727641	-1.87707	0.000953386	-2.64619	0.000916905	-0.769126	0.900069
novel-m0048-3p	0.813667	0.6923	0.250567	0.01	0.8061	0.5293	-0.227118	1	-1.73223	0.458946	-6.34044	0.0639659	-0.00755667	0.810953	-0.61443	0.869128	0.387312	0.840852	-1.1178	0.659811	-5.72601	0.0695993	0.606873	0.40747	-1.50511	0.346879	-6.11333	0.0209867	0.219561	0.673461	-4.60822	0.508493	1.72467	0.171049	6.33289	0.005214
novel-m0049-3p	0.393733	0.215767	0.0672333	0.523067	0.874033	0.01	-0.90076	0.804353	-2.68836	0.554951	0.403536	0.879638	1.16274	0.165307	-5.28688	0.270877	4.38612	0.69897	2.59852	1	5.69042	0.323191	6.44962	0.00567092	-1.7876	1	1.3043	0.619725	2.0635	0.0322799	3.09189	0.465457	3.85109	0.0247765	0.759199	0.385701
novel-m0051-3p	0.488267	1.52257	0.7584	0.819933	0.1235	0.971	1.65065	0.157167	0.645173	0.524639	0.75772	0.60905	-2.01275	0.636754	1.00168	0.408923	0.648962	0.694974	-0.356512	0.883123	-0.243965	0.739412	-3.01443	0.0905533	-1.00547	0.377	-0.892927	0.281845	-3.6634	0.0140181	0.112548	1	-2.65792	0.143899	-2.77047	0.188247
novel-m0052-3p	0.421067	1.1962	0.5916	0.718633	0.986	3.0667	1.5178	0.228708	0.493888	0.868317	0.769227	0.785875	1.23901	0.129112	2.87603	0.0300954	-1.35823	0.18164	-2.38214	0.0831012	-2.10681	0.104401	-1.63703	0.365742	-1.02392	0.521872	-0.748577	0.578354	-0.278799	0.812597	0.275339	1	0.745117	0.427649	0.469778	0.45355
novel-m0053-3p	1.77583	2.15417	1.08957	1.15397	2.61493	0.6688	0.278634	0.780571	-0.704742	0.591388	-0.621895	0.553075	0.558278	0.156229	-1.41606	0.257906	1.69469	0.0836065	0.711316	0.483974	0.794163	0.683098	1.97434	0.00857442	-0.983375	0.359342	-0.900528	0.235649	0.279644	0.198109	0.0828471	0.910959	1.26302	0.0802616	1.18017	0.0520508
novel-m0057-5p	0.7136	0.01	0.3078	0.747433	0.356733	0.711833	-6.15704	0.0532617	-1.22883	0.60751	0.0668293	1	-1.02749	0.899815	-0.00357612	1	-6.15347	0.0373198	-1.22526	0.432052	0.0704054	1	-1.02391	0.876567	4.92821	0.269174	6.22387	0.0144823	5.12956	0.266441	1.29566	0.445125	0.201345	1	-1.09432	0.88241
novel-m0059-3p	0.2783	0.440367	0.449733	0.4198	2.31177	0.140667	0.668487	0.819811	0.69908	0.826522	0.587351	0.858264	3.07167	0.00107405	-1.03702	0.726568	1.70551	0.375499	1.7361	0.422733	1.62437	0.64631	4.10869	0.00013242	0.0305937	1	-0.0811359	1	2.40318	0.000684493	-0.11173	1	2.37259	0.0088246	2.48432	0.00301237
novel-m0060-5p	16.693	16.6079	14.806	14.4763	7.9597	69.5595	-0.00737647	0.963368	-0.173067	1	-0.205557	0.872152	-1.06846	0.560743	2.059	0.0311555	-2.06638	0.000242469	-2.23207	0.00797249	-2.26456	8.5226e-05	-3.12746	0.00127113	-0.165691	0.990319	-0.19818	0.407235	-1.06108	0.256888	-0.0324891	0.764148	-0.895393	0.414529	-0.862904	0.480164
novel-m0061-5p	0.925767	0.416333	0.169267	0.9137	1.2147	0.486267	-1.16451	0.438306	-2.50932	0.205286	-0.0242009	1	0.39188	0.403176	-0.938825	0.617187	-0.225682	1	-1.5705	0.665198	0.914624	0.621412	1.3307	0.148777	-1.34481	0.650863	1.14031	0.443536	1.55639	0.0733652	2.48512	0.20388	2.9012	0.0288663	0.41608	0.387807
novel-m0064-3p	3.32683	2.99543	1.26883	2.01617	0.6392	1.27577	-0.151385	0.947538	-1.39065	0.202192	-0.722535	0.322636	-2.37981	0.0426622	-1.38279	0.120808	1.2314	0.0740456	-0.00786191	1	0.66025	0.555684	-0.997025	0.68082	-1.23926	0.116284	-0.57115	0.193635	-2.22843	0.0226148	0.668112	0.619621	-0.989163	0.515506	-1.65728	0.22367
novel-m0065-3p	3.32683	2.99543	1.26883	2.01617	0.6392	1.27577	-0.151385	0.947411	-1.39065	0.201211	-0.722535	0.321545	-2.37981	0.0423072	-1.38279	0.120268	1.2314	0.0734826	-0.00786191	1	0.66025	0.555433	-0.997025	0.680249	-1.23926	0.115361	-0.57115	0.193667	-2.22843	0.0222683	0.668112	0.619019	-0.989163	0.51496	-1.65728	0.222909
novel-m0066-3p	1.49227	0.9151	0.6033	0.649	0.0650333	0.620267	-0.705504	0.594657	-1.30656	0.425077	-1.20121	0.300889	-4.67622	0.0424878	-1.27432	0.368813	0.568815	0.595121	-0.032239	1	0.0731039	1	-3.4019	0.356764	-0.601054	0.741406	-0.495711	0.71493	-3.97071	0.0369401	0.105343	1	-3.36966	0.156692	-3.475	0.141028
novel-m0067-5p	0.0864333	0.1626	0.01	0.946033	0.3569	0.01	0.967071	1	-2.99579	1	3.56294	0.0994489	2.13446	0.532001	-2.99579	1	3.96286	0.68893	0	1	6.55873	0.0333828	5.13024	0.280265	-3.96286	0.675044	2.59587	0.158341	1.16739	0.600911	6.55873	0.0390942	5.13024	0.284669	-1.42848	0.650341
novel-m0068-3p	2.12197	2.639	1.14853	0.765167	1.4035	1.31257	0.314589	0.714222	-0.885609	0.537764	-1.47156	0.139629	-0.596373	0.941765	-0.693011	0.536893	1.0076	0.200815	-0.192598	1	-0.778545	0.460663	0.0966384	0.512317	-1.2002	0.199064	-1.78615	0.00364894	-0.910962	0.556591	-0.585947	0.438713	0.289236	0.68793	0.875183	0.145422
novel-m0077-3p	1.87457	1.80963	0.569267	1.264	0.192067	1.52533	-0.0508597	1	-1.72785	0.234387	-0.568561	0.618332	-3.33784	0.0677824	-0.297433	0.927591	0.246573	0.912723	-1.43042	0.336448	-0.271128	0.795993	-3.04041	0.0365157	-1.67699	0.17627	-0.517701	0.466192	-3.28698	0.019834	1.15929	0.459455	-1.60999	0.564896	-2.76928	0.0994699
novel-m0077-5p	76.872	74.085	26.9046	35.2675	3.77093	23.4585	-0.0532768	0.97907	-1.5146	0.0378131	-1.12412	0.0447886	-4.34946	1.3456e-07	-1.71234	0.0161335	1.65907	5.98902e-05	0.19774	0.584744	0.588228	0.267139	-2.63712	0.000614017	-1.46133	0.000542074	-1.07084	0.00010693	-4.29619	3.25608e-18	0.390488	0.626557	-2.83486	4.55834e-06	-3.22535	7.4092e-09
novel-m0078-3p	10550.8	11135	5965.93	12629.6	5658.18	2035.19	0.0777445	0.763342	-0.822539	0.221442	0.259446	0.486921	-0.898949	0.443288	-2.37413	9.47587e-05	2.45187	1.36817e-10	1.55159	0.00155816	2.63357	2.53832e-09	1.47518	0.000227401	-0.900284	0.0301233	0.181702	0.571416	-0.976693	0.128533	1.08199	0.0179582	-0.0764096	0.775116	-1.1584	0.0741025
novel-m0078-5p	22.5067	50.5611	26.0952	43.5146	12.4565	4.86753	1.16767	0.00378642	0.213426	0.378087	0.951142	0.0362789	-0.853462	0.555859	-2.20909	0.000513054	3.37677	3.23228e-13	2.42252	5.63932e-06	3.16024	1.33388e-09	1.35563	0.00117737	-0.954245	0.042563	-0.216529	0.453625	-2.02113	0.000325154	0.737716	0.182171	-1.06689	0.0808956	-1.8046	0.00636078
novel-m0079-3p	0.906	1.19103	0.4087	0.469933	0.9345	0.2367	0.399949	0.709213	-1.14315	0.535344	-0.952007	0.537103	0.0500013	0.727889	-1.95159	0.235523	2.35154	0.0699494	0.808444	0.559518	0.999588	0.598877	2.0016	0.0374143	-1.5431	0.237228	-1.35196	0.215256	-0.349947	0.902662	0.191144	1	1.19315	0.257837	1.00201	0.182691
novel-m0080-3p	7.2875	8.05253	4.7318	3.77937	3.17863	4.76663	0.144019	0.808295	-0.623035	0.647769	-0.947279	0.158441	-1.19702	0.410179	-0.612453	0.543637	0.756472	0.198686	-0.0105816	1	-0.334826	0.464218	-0.584564	0.895853	-0.767054	0.28199	-1.0913	0.0144646	-1.34104	0.210411	-0.324245	0.428959	-0.573982	0.566501	-0.249738	0.670653
novel-m0081-5p	0.845967	1.54993	1.70013	1.02667	0.0766667	0.8554	0.873533	0.432808	1.00698	0.253392	0.279295	0.763176	-3.59517	0.127125	0.0159984	0.878507	0.857535	0.465428	0.990977	0.321827	0.263297	1	-3.61117	0.0814004	0.133442	0.800284	-0.594238	0.383619	-4.46871	0.0087815	-0.72768	0.316129	-4.60215	0.00456799	-3.87447	0.0284924
novel-m0082-5p	18.9721	32.2359	15.0758	60.198	2.6923	15.9786	0.764788	0.0932251	-0.331651	0.816053	1.66583	0.00354917	-2.81697	0.00106574	-0.247738	0.947075	1.01253	0.0894121	-0.0839126	0.957542	1.91357	0.00914417	-2.56923	0.0142125	-1.09644	0.102915	0.901046	0.0536178	-3.58176	7.21333e-09	1.99748	0.0047557	-2.48532	0.00340203	-4.4828	4.39017e-09
novel-m0085-5p	5.01677	3.68947	1.34477	3.38973	0.313767	3.24127	-0.443346	0.456046	-1.8994	0.0229817	-0.565586	0.354627	-3.99899	7.93985e-05	-0.6302	0.62889	0.186855	1	-1.2692	0.119834	0.0646141	0.85196	-3.36879	0.00215222	-1.45606	0.0651045	-0.12224	0.746473	-3.55565	0.000274571	1.33382	0.103246	-2.09959	0.110391	-3.43341	0.00118111
novel-m0088-5p	1.41067	0.4386	0.680833	0.534267	0.253867	0.01	-1.69641	0.184537	-1.051	0.564522	-1.40075	0.26364	-2.51263	0.149809	-7.14023	0.00889897	5.44383	0.161682	6.08923	0.0286961	5.73949	0.123423	4.62761	0.548107	0.645402	0.563638	0.29566	1	-0.816221	1	-0.349742	0.695355	-1.46162	0.50968	-1.11188	0.84901
novel-m0089-5p	1.41067	0.4386	0.680833	0.534267	0.253867	0.01	-1.69641	0.185911	-1.051	0.565291	-1.40075	0.264873	-2.51263	0.151284	-7.14023	0.00893774	5.44383	0.161321	6.08923	0.028753	5.73949	0.123732	4.62761	0.545763	0.645402	0.564072	0.29566	1	-0.816221	1	-0.349742	0.696015	-1.46162	0.508369	-1.11188	0.849034
novel-m0091-3p	0.784133	0.670933	0.250567	1.10437	1.29157	0.842533	-0.218784	1	-1.67866	0.464627	0.500194	0.689804	0.726097	0.294407	0.104062	0.898684	-0.322845	0.737166	-1.78272	0.360963	0.396133	0.892043	0.622036	0.335447	-1.45988	0.426053	0.718978	0.394862	0.944881	0.111856	2.17886	0.126998	2.40476	0.0470337	0.225903	0.417305
novel-m0092-3p	0.4471	0.0683667	0.468833	0.965433	1.0581	0.01	-2.85726	0.315143	0.0581836	1	1.11058	0.347068	1.24281	0.143436	-5.48253	0.18419	2.62527	1	5.54071	0.144988	6.5931	0.00979414	6.72533	0.00273736	2.91544	0.295974	3.96783	0.0143422	4.10006	0.00465677	1.0524	0.419443	1.18462	0.228009	0.132227	0.509417
novel-m0093-3p	21.6096	16.8764	13.366	13.2577	2.8599	8.80023	-0.356665	0.395493	-0.693103	0.336734	-0.704848	0.110471	-2.91764	0.00011333	-1.29606	0.0311177	0.939396	0.0492613	0.602958	0.239289	0.591213	0.293912	-1.62158	0.162878	-0.336439	0.770118	-0.348183	0.249434	-2.56097	4.08973e-05	-0.0117445	0.713367	-2.22453	0.00331046	-2.21279	0.00164844
novel-m0093-5p	0.974	3.38627	1.15797	0.920433	0.659133	2.96013	1.7977	0.00639487	0.2496	0.729587	-0.0868427	1	-0.570666	1	1.60367	0.0767062	0.194033	0.771535	-1.35407	0.197689	-1.69051	0.0557142	-2.17433	0.14258	-1.5481	0.0408693	-1.88454	0.00117155	-2.36837	0.0120601	-0.336443	0.662281	-0.820266	0.624854	-0.483823	1
novel-m0094-3p	0.01	0.344333	0.578833	0.01	0.3604	0.435467	5.0917	0.249204	5.85508	0.0538975	0	1	5.15812	0.210323	5.4334	0.283948	-0.341705	1	0.421671	0.844857	-5.4334	0.264255	-0.275283	0.844599	0.763376	0.519057	-5.0917	0.224885	0.0664217	0.83619	-5.85508	0.0412556	-0.696955	0.86981	5.15812	0.137925
novel-m0095-5p	0.255233	0.0846333	0.724467	0.4022	2.623	0.0876333	-1.69192	0.717225	1.52407	0.277977	0.650948	1	3.38029	0.00236803	-1.63745	1	-0.0544706	1	3.16152	0.0940248	2.2884	0.628964	5.01775	0.000537388	3.21599	0.0681403	2.34287	0.49285	5.07222	0.00010632	-0.87312	0.547381	1.85623	0.0479619	2.72935	0.00395412
novel-m0096-5p	0.328733	0.5398	0.711167	1.695	0.4188	0.370667	0.730211	0.824506	1.1212	0.543626	2.381	0.0156397	0.352518	0.685603	0.174876	1	0.555335	0.812814	0.94632	0.613663	2.20612	0.0382596	0.177643	0.67272	0.390985	0.765849	1.65079	0.0535686	-0.377692	1	1.2598	0.321866	-0.768677	0.808715	-2.02848	0.153745
novel-m0099-3p	6.02373	3.38963	1.75753	2.11317	1.77637	1.03577	-0.829529	0.285447	-1.77711	0.0712315	-1.51125	0.0557938	-1.76173	0.181081	-2.53996	0.0220956	1.71043	0.0265675	0.762853	0.405353	1.02871	0.28622	0.77823	0.339793	-0.947577	0.223025	-0.681723	0.0973528	-0.9322	0.474416	0.265855	1	0.0153774	0.853872	-0.250477	0.829603
novel-m0099-5p	0.255233	0.3769	1.11563	0.619833	0.130267	0.01	0.568515	1	2.14694	0.112889	1.29903	0.510698	-1.02717	1	-4.65478	0.591117	5.22329	0.269449	6.80172	0.00802595	5.95381	0.0742991	3.62761	0.764617	1.57843	0.134902	0.730515	0.838367	-1.59569	0.810261	-0.847911	0.321805	-3.17411	0.0611996	-2.3262	0.352462
novel-m0103-3p	0.0864333	0.01	0.631467	0.244	0.850567	0.01	-2.99579	1	2.97721	0.209824	1.57306	0.791167	3.41457	0.034584	-2.99579	1	0	1	5.973	0.0900832	4.56884	0.683728	6.41035	0.00903866	5.973	0.0522022	4.56884	0.49815	6.41035	0.00359222	-1.40416	0.490998	0.437353	0.619241	1.84151	0.115061
novel-m0103-5p	0.01	0.568933	0.6826	0.297333	2.78117	0.2993	5.83019	0.0580264	6.08591	0.0800856	4.86129	0.516605	8.11955	7.35443e-06	4.88736	0.391916	0.942825	0.66087	1.19854	0.597581	-0.0260691	1	3.23218	0.00117844	0.255718	0.75357	-0.968894	0.683114	2.28936	0.000661936	-1.22461	0.553483	2.03364	0.0159179	3.25825	0.000100421
novel-m0104-3p	2.92183	4.00583	6.39833	4.91067	1.31487	4.55603	0.455229	0.420444	1.13082	0.0280042	0.749045	0.240407	-1.15196	0.384485	0.640904	0.28939	-0.185676	0.610059	0.489918	0.413376	0.108141	0.963127	-1.79286	0.070483	0.675594	0.0540626	0.293816	0.632664	-1.60719	0.0679935	-0.381777	0.272328	-2.28278	0.000696844	-1.901	0.0349977
novel-m0105-3p	3.5935	6.0296	8.4747	4.31827	26.8277	3.0345	0.746673	0.126404	1.23777	0.0159865	0.265063	0.67468	2.90026	1.82269e-08	-0.243931	0.84719	0.990603	0.0543117	1.4817	0.0103907	0.508994	0.487562	3.14419	3.38873e-09	0.4911	0.10691	-0.48161	0.15766	2.15359	4.57776e-10	-0.97271	0.0145331	1.66249	0.000433547	2.6352	6.22901e-12
novel-m0106-5p	6.77777	5.01943	10.2597	7.501	13.9505	3.161	-0.433285	0.39961	0.598102	0.139989	0.146273	0.779281	1.04143	0.00460555	-1.10043	0.338398	0.667143	0.567212	1.69853	0.028796	1.2467	0.137578	2.14186	0.000941229	1.03139	0.0113123	0.579558	0.190939	1.47472	1.08506e-05	-0.451829	0.22764	0.443333	0.238099	0.895162	0.00267929
novel-m0107-5p	0.440833	1.8328	0.518233	1.31717	0.656867	2.30937	2.05574	0.0190322	0.233368	0.845088	1.57913	0.165452	0.568028	0.481871	2.38919	0.00973862	-0.333448	0.554378	-2.15582	0.0260748	-0.810059	0.202293	-1.82116	0.179932	-1.82238	0.0539377	-0.476611	0.443895	-1.48772	0.389367	1.34576	0.313967	0.334659	0.778678	-1.01111	0.744854
novel-m0108-5p	0.440833	1.8328	0.518233	1.31717	0.656867	2.30937	2.05574	0.0193578	0.233368	0.845031	1.57913	0.165638	0.568028	0.48282	2.38919	0.00982351	-0.333448	0.554927	-2.15582	0.026387	-0.810059	0.202206	-1.82116	0.180799	-1.82238	0.0543411	-0.476611	0.44475	-1.48772	0.390818	1.34576	0.314028	0.334659	0.779221	-1.01111	0.745144
novel-m0109-3p	0.01	0.4223	0.1768	0.109933	0.632333	0.01	5.38876	0.175695	4.08859	0.554373	3.3683	1	5.98261	0.0170193	0	1	5.38876	0.148882	4.08859	0.716013	3.3683	1	5.98261	0.0154747	-1.30017	0.632429	-2.02046	0.354413	0.59385	0.357904	-0.720291	1	1.89402	0.168111	2.61431	0.0491907
novel-m0111-5p	8.66737	6.36967	3.30477	2.21487	2.16883	3.5425	-0.444376	0.402977	-1.39105	0.0636085	-1.96837	0.00199536	-1.99867	0.0266721	-1.29083	0.063529	0.84645	0.103486	-0.100219	0.956055	-0.677548	0.372315	-0.707849	0.899958	-0.946669	0.10473	-1.524	0.000374358	-1.5543	0.037945	-0.577329	0.212125	-0.607629	0.554143	-0.0303007	0.516278
novel-m0115-5p	10.0919	5.0381	4.57327	5.75063	5.62357	2.23937	-1.00225	0.0845218	-1.14191	0.16596	-0.81141	0.11378	-0.843645	0.609823	-2.17204	0.00367169	1.16979	0.0703807	1.03013	0.109417	1.36063	0.0324002	1.32839	0.00545882	-0.139655	0.965919	0.190841	0.806772	0.158606	0.274155	0.330496	0.822463	0.29826	0.402819	-0.0322354	0.297147
novel-m0117-3p	1.10203	1.58263	0.688367	1.54333	0.205167	1.24563	0.522159	0.563406	-0.678919	0.901355	0.485882	0.719996	-2.44893	0.168663	0.176712	1	0.345448	0.718446	-0.85563	0.593094	0.30917	0.806826	-2.62564	0.157617	-1.20108	0.33706	-0.0362774	1	-2.97109	0.0483773	1.1648	0.311873	-1.77001	0.355798	-2.93481	0.0623266
novel-m0119-3p	0.246	0.335833	0.6729	1.11207	2.726	0.274633	0.474333	1	1.48421	0.532586	2.21615	0.118006	3.50969	0.00404579	0.163032	1	0.311301	1	1.32117	0.510731	2.05312	0.215446	3.34666	0.00537331	1.00987	0.491465	1.74182	0.175346	3.03536	0.0016442	0.731944	0.723372	2.02549	0.0525704	1.29354	0.0652962
novel-m0119-5p	0.704367	0.708567	0.127833	0.1857	1.95237	0.274633	0.00861762	1	-2.53249	0.244236	-1.94264	0.332076	1.4752	0.129663	-1.38743	0.431263	1.39605	0.609019	-1.14506	0.798808	-0.555211	1	2.86263	0.0293192	-2.54111	0.400937	-1.95126	0.323061	1.46659	0.102336	0.589849	1	4.00769	0.0144864	3.41784	0.00460964
novel-m0120-3p	7.155	5.72193	11.2682	13.7171	19.9317	2.5081	-0.322449	0.662719	0.655238	0.242727	0.938952	0.193728	1.47804	0.0094906	-1.51236	0.104553	1.18991	0.0338458	2.16759	0.000308522	2.45131	3.84275e-06	2.9904	1.07532e-07	0.977687	0.00556449	1.2614	0.000106803	1.80049	1.23911e-07	0.283714	0.858174	0.822801	0.050582	0.539087	0.00978558
novel-m0121-3p	0.574333	0.318533	0.964633	0.400367	0.01	0.5628	-0.872561	0.7429	0.75649	0.457252	-0.512169	1	-5.83542	0.154559	-0.0294386	0.86369	-0.843123	0.568183	0.785928	0.630889	-0.48273	0.667357	-5.80598	0.134205	1.62905	0.182656	0.360393	1	-4.96286	0.435771	-1.26866	0.212581	-6.59191	0.00565616	-5.32325	0.140463
novel-m0122-5p	2.55013	1.38727	0.656367	0.833	0.205167	1.18813	-0.878328	0.324215	-1.958	0.090335	-1.61418	0.0937744	-3.65934	0.0156081	-1.10188	0.370154	0.223548	1	-0.856123	0.560294	-0.512308	0.466546	-2.55746	0.108781	-1.07967	0.379986	-0.735857	0.377056	-2.78101	0.0752079	0.343815	1	-1.70134	0.307163	-2.04515	0.479691
novel-m0125-5p	0.198533	0.1112	0.0917333	0.01	0.192067	1.06817	-0.90099	1	-1.19829	1	-4.28688	0.588841	-0.0743118	1	2.45211	0.0972661	-3.3531	0.027148	-3.6504	0.0435999	-6.73899	0.00875439	-2.52642	0.129197	-0.297297	1	-3.38589	1	0.826678	0.791612	-3.08859	1	1.12398	0.804935	4.21257	0.517731
novel-m0126-3p	0.4853	0.368367	0.1884	0.747433	0.01	0.01	-0.390893	1	-1.3971	0.726334	0.643024	0.736908	-5.58085	0.328922	-5.58085	0.314099	5.18996	0.22929	4.18375	0.68108	6.22387	0.0276921	0	1	-1.00621	1	1.03392	0.38302	-5.18996	0.271776	2.04012	0.333501	-4.18375	0.565075	-6.22387	0.0259849
novel-m0126-5p	6.89993	11.1833	9.9017	10.892	20.8338	13.1723	0.696692	0.147604	0.521094	0.222869	0.658615	0.193784	1.59427	0.0004929	0.932857	0.0944855	-0.236165	0.527999	-0.411763	0.567249	-0.274242	0.401186	0.661413	0.0335158	-0.175598	0.960436	-0.0380771	0.781248	0.897578	0.000539272	0.137521	0.901243	1.07318	0.0180765	0.935655	0.000525142
novel-m0127-3p	0.4853	0.368367	0.1884	0.747433	0.01	0.01	-0.390893	1	-1.3971	0.727385	0.643024	0.737548	-5.58085	0.329401	-5.58085	0.315312	5.18996	0.228259	4.18375	0.681581	6.22387	0.0278694	0	1	-1.00621	1	1.03392	0.384331	-5.18996	0.271338	2.04012	0.334366	-4.18375	0.56564	-6.22387	0.026245
novel-m0127-5p	6.89993	11.1833	9.9017	10.892	20.8338	13.1723	0.696692	0.147589	0.521094	0.222225	0.658615	0.194047	1.59427	0.000497549	0.932857	0.0947721	-0.236165	0.527598	-0.411763	0.567685	-0.274242	0.401628	0.661413	0.033677	-0.175598	0.96044	-0.0380771	0.780992	0.897578	0.000535928	0.137521	0.901368	1.07318	0.0179621	0.935655	0.000534033
novel-m0128-3p	0.733867	1.43867	2.0178	1.50617	16.7888	0.5823	0.97771	0.295547	1.46576	0.095407	1.04386	0.28944	4.52241	4.77529e-10	-0.327187	1	1.3049	0.191125	1.79295	0.0472872	1.37105	0.149379	4.8496	8.94573e-12	0.488051	0.338238	0.0661491	1	3.5447	8.85608e-16	-0.421902	0.447838	3.05665	2.87754e-07	3.47855	7.39742e-14
novel-m0129-5p	0.938333	2.19523	2.30747	2.39093	0.426733	2.78347	1.2262	0.129653	1.29814	0.0903805	1.3494	0.0804458	-1.15948	0.816645	1.56871	0.0577621	-0.342509	0.59151	-0.270573	0.802725	-0.219309	0.640755	-2.72819	0.0456897	0.0719355	0.711873	0.1232	1	-2.38568	0.102547	0.0512641	0.83243	-2.45762	0.0554071	-2.50888	0.0943166
novel-m0130-5p	1.73173	1.32217	0.8397	0.7168	0.192067	0.638667	-0.389313	0.75756	-1.04427	0.431997	-1.27257	0.173676	-3.2235	0.0426799	-1.44663	0.190186	1.05732	0.291667	0.40236	0.64105	0.174057	1	-1.77687	0.5612	-0.654958	0.730426	-0.883262	0.392442	-2.83419	0.0915579	-0.228303	0.877871	-2.17923	0.254826	-1.95093	0.425547
novel-m0131-3p	0.799667	0.445533	0.01	0.255033	0.1235	0.106033	-0.843865	0.571503	-6.32133	0.0477076	-1.64871	0.31319	-2.73436	0.226379	-3.00856	0.146069	2.1647	0.291296	-3.31276	1	1.35985	0.679614	0.274203	1	-5.47746	0.0704702	-0.804848	0.553652	-1.8905	0.547051	4.67261	0.307983	3.58696	0.575916	-1.08565	1
novel-m0133-5p	0.255233	3.09747	1.3181	2.1017	1.3759	0.6688	3.62017	0.000719485	2.38754	0.059647	3.06063	0.00463885	2.44945	0.0243273	1.40152	0.474545	2.21865	0.0171413	0.986022	0.363123	1.65912	0.0936075	1.04794	0.122749	-1.23263	0.156495	-0.559532	0.326244	-1.17071	0.478705	0.673097	0.615252	0.0619158	0.795071	-0.611181	1
novel-m0134-5p	0.264867	0.628067	0.3726	0.1551	0.135133	0.01	1.28243	0.510976	0.529139	0.828076	-0.766634	1	-0.970139	1	-4.69042	0.531089	5.97285	0.0320225	5.21956	0.187969	3.92378	0.550149	3.72028	0.563994	-0.75329	0.656142	-2.04906	0.160855	-2.25257	0.285514	-1.29577	0.549387	-1.49928	0.562107	-0.203505	1
novel-m0135-5p	2.30483	2.69907	0.578833	3.35967	0.4188	2.25113	0.227798	0.746003	-1.99344	0.0918268	0.543656	0.447689	-2.47186	0.055741	-0.0340109	0.938773	0.261809	0.803955	-1.95943	0.0725943	0.577667	0.539603	-2.43785	0.0897205	-2.22124	0.0102498	0.315857	0.577153	-2.69966	0.00804573	2.5371	0.00420482	-0.478415	1	-3.01551	0.00578496
novel-m0136-5p	0.352967	0.01	0.1884	0.01	0.878533	0.01	-5.11395	0.408741	-0.930199	0.85551	-5.11395	0.456057	1.33759	0.32324	-5.11395	0.527569	0	1	4.18375	0.680584	0	1	6.45154	0.0267639	4.18375	0.473088	0	1	6.45154	0.0154147	-4.18375	0.525685	2.26779	0.180379	6.45154	0.0200399
novel-m0138-5p	0.5995	1.69473	2.14303	0.802367	2.05363	2.74367	1.50727	0.191315	1.84587	0.053971	0.428546	0.885569	1.78439	0.0226532	2.20232	0.0309134	-0.695047	0.308292	-0.356451	0.705033	-1.77377	0.0223879	-0.417927	0.944494	0.338596	0.446448	-1.07872	0.244806	0.27712	0.220333	-1.41732	0.0382466	-0.0614757	0.884936	1.35585	0.0163213
novel-m0139-3p	1.9208	1.33153	0.6713	1.12853	0.1853	0.2993	-0.528619	0.570093	-1.52386	0.248176	-0.767258	0.467617	-3.39996	0.0375689	-2.6982	0.0847695	2.16958	0.106282	1.17434	0.597982	1.93094	0.182408	-0.701761	1	-0.995241	0.466927	-0.23864	0.889497	-2.87134	0.0576096	0.756601	0.603568	-1.8761	0.403786	-2.6327	0.098268
novel-m0140-5p	0.900533	0.864533	0.01	0.469933	0.01	0.413733	-0.0588581	1	-6.49271	0.0247477	-0.948593	0.483608	-6.49271	0.0189448	-1.12208	0.406715	1.06322	0.42048	-5.37063	0.18267	0.173485	1	-5.37063	0.187917	-6.43385	0.011495	-0.889735	0.489777	-6.43385	0.0121337	5.54411	0.171458	0	1	-5.54411	0.166825
novel-m0141-3p	3.89613	1.64773	1.58363	1.97	0.0650333	1.04907	-1.24156	0.0777787	-1.2988	0.183558	-0.986291	0.268529	-6.06075	0.000112898	-1.89294	0.0395722	0.651376	0.504665	0.594132	0.478083	0.906646	0.401178	-4.16782	0.0704038	-0.0572444	0.927016	0.25527	0.781806	-4.81919	0.00236081	0.312514	0.891783	-4.76195	0.00995583	-5.07446	0.00810594
novel-m0141-5p	19.4041	20.9385	26.8262	23.0877	7.00383	11.3936	0.109797	0.764867	0.467279	0.167432	0.250765	0.552927	-1.47014	0.0809165	-0.768142	0.31413	0.877939	0.0556444	1.23542	0.0128417	1.01891	0.0408688	-0.702003	0.663808	0.357483	0.119449	0.140968	0.709011	-1.57994	0.00861508	-0.216514	0.292148	-1.93742	0.000469494	-1.72091	0.00429785
novel-m0146-3p	7.87537	7.51287	11.2583	14.8357	12.8936	5.48017	-0.0679836	0.91965	0.51557	0.220798	0.913657	0.151995	0.711236	0.0350878	-0.523127	0.50775	0.455144	0.465134	1.0387	0.0695076	1.43678	0.0336416	1.23436	0.00497641	0.583554	0.0807392	0.981641	0.0586481	0.77922	0.00128737	0.398087	0.741721	0.195666	0.469976	-0.202421	0.60593
novel-m0147-5p	0.944467	0.266367	0.538967	0.01	0.3089	0.382433	-1.84425	0.237809	-0.809304	0.770234	-6.56143	0.0321588	-1.62801	0.458226	-1.31692	0.502893	-0.527333	1	0.507618	0.822286	-5.24451	0.261847	-0.311091	1	1.03495	0.479638	-4.71717	0.36243	0.216242	0.821745	-5.75212	0.0517	-0.818709	0.857287	4.93342	0.214714
novel-m0148-5p	90.8341	239.626	173.207	317.043	83.2833	142.418	1.39948	5.67401e-05	0.931191	0.0146543	1.80337	1.61634e-05	-0.125207	0.422738	0.648825	0.131038	0.750655	0.0679753	0.282365	0.477485	1.15455	0.0164322	-0.774032	0.585765	-0.46829	0.420316	0.403891	0.196069	-1.52469	0.0222573	0.872181	0.0664232	-1.0564	0.0728707	-1.92858	0.00361062
novel-m0149-3p	450.564	1021.66	1040.81	1352.13	1045.95	439.045	1.18111	0.000163301	1.2079	0.00295573	1.58543	2.22064e-05	1.21501	0.000427493	-0.0373633	0.829552	1.21847	0.00165921	1.24527	0.0074459	1.62279	0.000164628	1.25237	0.000649871	0.0267943	0.456639	0.404322	0.112114	0.0339028	0.076721	0.377527	0.607119	0.00710844	0.646615	-0.370419	0.70776
novel-m0149-5p	44.7513	99.5339	130.236	161.328	94.5465	41.367	1.15326	0.00316085	1.54112	0.000738846	1.84999	2.43237e-05	1.07909	0.00288182	-0.113449	0.955871	1.26671	0.00148635	1.65457	0.000812583	1.96344	1.61803e-05	1.19254	0.00114902	0.387863	0.064328	0.696735	0.00731265	-0.0741634	0.209114	0.308872	0.741152	-0.462026	0.591299	-0.770899	0.502983
novel-m0151-3p	449.063	545.425	378.531	687.268	357.17	271.773	0.280463	0.432316	-0.246508	0.99523	0.613954	0.192916	-0.330307	0.763621	-0.724514	0.302534	1.00498	0.0112963	0.478007	0.267085	1.33847	0.00917736	0.394208	0.0985533	-0.526971	0.341601	0.333492	0.375906	-0.610769	0.718751	0.860462	0.138071	-0.0837987	0.809435	-0.944261	0.320643
novel-m0151-5p	112.675	103.122	98.859	112.089	50.5073	45.2068	-0.127805	0.75023	-0.188718	0.879459	-0.00751763	0.97677	-1.1576	0.191193	-1.31755	0.0456695	1.18975	0.015645	1.12883	0.027572	1.31003	0.00965192	0.159953	0.292751	-0.0609131	0.641935	0.120287	0.736989	-1.02979	0.163426	0.1812	0.966657	-0.968879	0.0921087	-1.15008	0.102335
novel-m0153-5p	0.361033	0.01	0.0879667	0.6153	0.9242	0.9268	-5.17406	0.184644	-2.1508	0.485869	0.761321	0.707809	1.35607	0.138109	1.36013	0.21183	-6.53419	0.0109012	-3.51093	0.0608415	-0.598805	0.750791	-0.00405295	0.703604	3.02326	1	5.93538	0.0811464	6.53013	0.00174504	2.91213	0.24542	3.50688	0.0183116	0.594752	0.36894
novel-m0155-3p	0.01	0.01	0.209567	0.0793333	1.2929	0.5757	0	1	4.36621	0.372188	2.86129	1	7.01447	0.00100167	5.84725	0.0569864	-5.84725	0.0379725	-1.48104	0.293331	-2.98595	0.135733	1.16722	0.150188	4.36621	0.352076	2.86129	1	7.01447	0.000219729	-1.50491	0.722165	2.64826	0.0307235	4.15317	0.00172115
novel-m0159-5p	5.0146	5.3244	5.80313	8.84497	5.868	11.4906	0.0864843	0.833222	0.210697	0.471869	0.818722	0.104255	0.226734	0.212639	1.19625	0.0324871	-1.10977	0.0114993	-0.985554	0.108294	-0.37753	0.302537	-0.969518	0.419404	0.124213	0.44283	0.732238	0.0491316	0.14025	0.159579	0.608025	0.374416	0.0160368	0.704698	-0.591988	1
novel-m0160-5p	32.8684	52.3946	50.7934	51.4303	65.5755	8.3114	0.672718	0.0947657	0.627942	0.112648	0.645918	0.144245	0.996456	0.00936149	-1.98354	0.00216344	2.65625	8.92007e-10	2.61148	1.49248e-06	2.62945	5.13504e-08	2.97999	4.02382e-08	-0.0447761	0.652924	-0.0268005	0.806454	0.323738	0.0355376	0.0179756	0.697901	0.368514	0.268942	0.350539	0.0508441
novel-m0164-3p	0.198533	0.5457	0.2058	0.152	0.01	1.0792	1.47432	0.37132	0.0527314	1	-0.425587	1	-4.28688	0.591248	2.46694	0.114996	-0.992622	0.498769	-2.41421	0.111789	-2.89252	0.0433559	-6.75382	0.0190478	-1.42158	0.53119	-1.8999	0.354344	-5.7612	0.0951332	-0.478319	1	-4.33961	0.396241	-3.86129	0.739541
novel-m0164-5p	19.1772	2.34343	1.53563	0.7766	1.04763	6.42163	-3.03269	5.3006e-05	-3.64248	0.00014404	-4.62607	4.80858e-07	-4.19418	0.000124936	-1.57838	0.0710851	-1.45432	0.00327977	-2.06411	0.00375151	-3.0477	3.31333e-06	-2.61581	0.00283889	-0.60979	0.580383	-1.59338	0.0203908	-1.16149	0.471754	-0.98359	0.178212	-0.5517	0.711864	0.43189	0.336969
novel-m0166-5p	0.405533	0.2047	0.7659	0.01	0.2167	0.2367	-0.986082	0.662629	0.941249	0.443912	-5.31783	0.385611	-0.925288	1	-0.773308	0.812322	-0.212774	1	1.71456	0.155474	-4.54453	0.574532	-0.15198	1	1.92733	0.075296	-4.33175	0.342349	0.0607934	1	-6.25908	0.0149142	-1.86654	0.300096	4.39255	0.445375
novel-m0169-3p	0.619233	2.0409	0.695467	1.56613	0.8109	0.4763	1.72065	0.0527203	0.160567	0.789733	1.33865	0.16897	0.389041	0.443685	-0.378613	1	2.09926	0.0470193	0.539179	0.869487	1.71726	0.134932	0.767653	0.397681	-1.56008	0.189229	-0.381998	0.532466	-1.33161	0.30378	1.17809	0.390579	0.228474	0.821449	-0.949611	0.622002
novel-m0170-3p	0.01	0.2442	0.408267	0.778033	0.689367	0.801667	4.60999	0.308262	5.33961	0.195419	6.28176	0.0359019	6.1072	0.0269191	6.31288	0.157805	-1.70289	0.484449	-0.97327	0.704394	-0.0311229	1	-0.205683	0.905929	0.729621	0.636288	1.67177	0.245429	1.49721	0.160245	0.942148	0.58552	0.767587	0.443434	-0.17456	0.886923
novel-m0172-3p	0.320267	0.754	0.6771	0.886333	1.43707	0.168633	1.25039	0.467826	1.09519	0.465565	1.48367	0.330219	2.18088	0.0416622	-0.968482	1	2.21887	0.206833	2.06367	0.246486	2.45215	0.148608	3.14936	0.0173185	-0.155196	1	0.233285	1	0.930491	0.142854	0.38848	0.868699	1.08569	0.197273	0.697206	0.160718
novel-m0172-5p	0.246	0.143	0.127833	0.1551	0.5589	0.01	-0.777034	1	-0.982028	1	-0.657166	1	1.22357	0.362697	-4.58095	0.694574	3.80392	0.549773	3.59892	1	3.92378	0.551887	5.80452	0.0300817	-0.204995	1	0.119867	1	2.0006	0.14566	0.324862	1	2.2056	0.207596	1.88074	0.146929
novel-m0177-3p	2.73293	3.60387	5.7078	3.7954	7.34067	0.656667	0.399095	0.51043	1.06248	0.0818469	0.473802	0.433716	1.42546	0.00281393	-2.05722	0.0640369	2.45631	0.00340351	3.1197	0.00047596	2.53102	0.00159721	3.48268	2.19319e-06	0.663389	0.125861	0.0747063	0.935126	1.02637	0.00176214	-0.588683	0.197989	0.362976	0.363316	0.951659	0.00389232
novel-m0179-3p	0.866867	1.0762	1.41853	0.213233	0.5753	0.445033	0.312064	0.780746	0.710518	0.425146	-2.0692	0.191137	-0.591496	1	-0.972743	0.863426	1.28481	0.394725	1.68326	0.174476	-1.09646	0.616949	0.381248	0.601805	0.398454	0.470437	-2.38127	0.0268312	-0.90356	0.78522	-2.77972	0.00846191	-1.30201	0.292735	1.47771	0.184738
novel-m0180-5p	0.1662	0.01	0.476367	0.251933	0.648767	0.3048	-3.99579	0.669462	1.56808	0.545681	0.639968	1	2.02384	0.192625	0.9021	0.787626	-4.89789	0.466236	0.665984	0.702018	-0.262131	1	1.12174	0.341511	5.56387	0.0969335	4.63575	0.361261	6.01963	0.0135579	-0.928116	0.559274	0.455758	0.768738	1.38387	0.183685
novel-m0181-3p	0.248933	0.0683667	0.127833	0.01	0.406967	1.31257	-1.99297	0.71037	-1.01932	1	-4.61824	0.381065	0.716735	0.587714	2.41801	0.065829	-4.41098	0.0204745	-3.43733	0.0270065	-7.03625	0.00411641	-1.70127	0.408498	0.97365	1	-2.62527	1	2.7097	0.264048	-3.59892	0.70836	1.73605	0.561348	5.33497	0.122896
novel-m0182-5p	266.922	271.303	141.988	186.045	50.5807	192.628	0.0234846	0.898158	-0.910656	0.192887	-0.520768	0.252255	-2.39976	0.000550607	-0.470606	0.645162	0.494091	0.346034	-0.44005	0.413084	-0.0501618	0.61486	-1.92915	0.00419568	-0.93414	0.0358031	-0.544253	0.0189238	-2.42325	7.58239e-08	0.389888	0.565095	-1.4891	0.00763498	-1.87899	0.000261985
novel-m0183-3p	1.02423	1.77967	0.652633	0.4068	0.817733	0.743133	0.797063	0.372164	-0.6502	0.781478	-1.33215	0.32812	-0.324842	1	-0.469337	1	1.2664	0.245916	-0.180863	1	-0.862816	0.422447	0.144495	0.669597	-1.44726	0.119238	-2.12922	0.00611633	-1.1219	0.467286	-0.681953	0.543628	0.325358	0.69261	1.00731	0.222785
novel-m0184-3p	6.78833	5.58403	6.42873	4.73983	0.877467	2.50737	-0.28175	0.644058	-0.0785229	0.763648	-0.518221	0.378924	-2.95164	0.00100084	-1.43688	0.0537415	1.15513	0.0410086	1.35836	0.0317301	0.918663	0.18954	-1.51476	0.306554	0.203227	0.349216	-0.236471	0.475904	-2.66989	0.000223087	-0.439698	0.218455	-2.87312	8.53286e-05	-2.43342	0.00358234
novel-m0185-5p	1.38747	0.3203	0.961	0.397267	1.11303	1.2433	-2.1453	0.0761118	-0.534858	0.927839	-1.81643	0.185381	-0.317956	0.916142	-0.158279	1	-1.98702	0.143714	-0.376579	0.849279	-1.65815	0.204813	-0.159678	0.745168	1.61044	0.2802	0.328873	1	1.82735	0.0357447	-1.28157	0.387592	0.216901	0.787549	1.49847	0.0908621
novel-m0186-3p	0.01	0.644367	0.888833	0.3246	3.01753	0.5293	6.00981	0.0368718	6.46842	0.0350255	5.0057	0.289869	8.23723	7.69964e-07	5.72601	0.121875	0.283796	1	0.742407	0.543569	-0.720314	0.60334	2.51121	0.000962507	0.45861	0.595801	-1.00411	0.501623	2.22742	6.57781e-05	-1.46272	0.298703	1.76881	0.022209	3.23153	1.19609e-05
novel-m0187-3p	0.509167	0.933967	0.266367	0.6619	0.01	0.01	0.884709	0.505193	-0.943416	0.69643	0.387951	0.857281	-5.66059	0.183211	-5.66059	0.207067	6.5453	0.00885603	4.71717	0.378376	6.04854	0.03361	0	1	-1.82813	0.236406	-0.496758	0.562716	-6.5453	0.00782153	1.33137	0.524658	-4.71717	0.281231	-6.04854	0.0295176
novel-m0189-3p	1.62267	0.130067	0.1768	0.0857667	0.0650333	0.01	-3.71101	0.0773367	-3.24769	0.235911	-4.35261	0.0699654	-4.79114	0.108457	-7.33628	0.0412792	3.62527	0.701356	4.08859	0.717575	2.98368	1	2.54514	1	0.463323	1	-0.641593	1	-1.08013	1	-1.10492	1	-1.54345	1	-0.438533	1
novel-m0190-5p	7.72663	6.50257	8.53607	6.70793	7.61697	13.2592	-0.248831	0.621865	0.143732	0.504687	-0.203972	0.681079	-0.0206234	0.379038	0.779078	0.106953	-1.02791	0.0110459	-0.635347	0.349011	-0.98305	0.0156041	-0.799702	0.562949	0.392562	0.209601	0.0448591	1	0.228207	0.073249	-0.347703	0.312247	-0.164355	0.966105	0.183348	0.121872
novel-m0194-3p	20.0151	16.2722	20.4878	20.9136	27.4242	12.3469	-0.298682	0.612451	0.0336715	0.712721	0.0633525	0.976761	0.45436	0.168531	-0.696942	0.472398	0.39826	0.50754	0.730614	0.15201	0.760295	0.19758	1.1513	0.00350692	0.332353	0.137938	0.362034	0.299983	0.753042	0.00104764	0.029681	0.725134	0.420689	0.206528	0.391008	0.0394967
novel-m0195-5p	0.248933	0.191733	0.915233	0.244	0.248433	0.01	-0.408265	1	1.89257	0.27247	-0.0493958	1	-0.00294008	1	-4.61824	0.58753	4.20997	0.668496	6.5108	0.0304875	4.56884	0.683314	4.6153	0.292269	2.30083	0.125569	0.35887	1	0.405325	0.807249	-1.94196	0.23076	-1.89551	0.336436	0.0464557	1
novel-m0196-3p	2.13887	2.50533	0.7614	3.32393	1.15427	1.67183	0.228156	0.822686	-1.49645	0.339779	0.636045	0.450459	-0.88987	0.705255	-0.355416	1	0.583572	0.747003	-1.14103	0.332953	0.99146	0.365793	-0.534454	0.937413	-1.72461	0.135077	0.407889	0.541562	-1.11803	0.46587	2.13249	0.0220334	0.60658	0.524252	-1.52591	0.178407
novel-m0197-5p	6.0243	10.312	5.0805	10.984	5.37523	4.56713	0.775463	0.0857971	-0.245823	1	0.866534	0.0732577	-0.164466	0.54223	-0.399505	0.659245	1.17497	0.0160004	0.153682	0.711678	1.26604	0.0165669	0.235038	0.204029	-1.02129	0.0532142	0.0910703	0.883283	-0.93993	0.374486	1.11236	0.0337753	0.0813569	0.60881	-1.031	0.260915
novel-m0198-5p	14.3873	17.4742	16.956	26.8796	16.4088	13.3953	0.280437	0.454315	0.237001	0.381677	0.901719	0.0249106	0.189677	0.164658	-0.103066	0.942019	0.383502	0.465388	0.340066	0.466321	1.00478	0.0321282	0.292743	0.159567	-0.0434361	0.681149	0.621283	0.0312629	-0.0907594	0.246227	0.664719	0.253402	-0.0473233	0.767864	-0.712042	0.635814
novel-m0201-3p	7.11327	6.33547	4.80547	4.87517	1.5889	6.54747	-0.167061	0.832959	-0.565836	0.631698	-0.545061	0.424632	-2.16248	0.0464207	-0.119575	0.931743	-0.0474859	0.965358	-0.44626	0.625501	-0.425485	0.348369	-2.04291	0.0369224	-0.398774	0.700956	-0.377999	0.244301	-1.99542	0.00746302	0.020775	0.752479	-1.59665	0.0701944	-1.61742	0.071622
novel-m0202-3p	7.11327	6.33547	4.80547	4.87517	1.5889	6.54747	-0.167061	0.832516	-0.565836	0.63174	-0.545061	0.424368	-2.16248	0.0463536	-0.119575	0.931748	-0.0474859	0.965219	-0.44626	0.625576	-0.425485	0.348344	-2.04291	0.0368995	-0.398774	0.701057	-0.377999	0.244411	-1.99542	0.00739264	0.020775	0.752607	-1.59665	0.0697992	-1.61742	0.0707348
novel-m0203-3p	1.93527	0.515	0.4249	1.20903	0.1234	0.860933	-1.90989	0.0563232	-2.1987	0.147207	-0.678678	0.469812	-4.05124	0.0181717	-1.17416	0.435528	-0.735732	0.491328	-1.02454	0.579766	0.495477	0.891761	-2.87709	0.287884	-0.288812	1	1.23121	0.200659	-2.14136	0.458011	1.52002	0.310874	-1.85254	0.580547	-3.37257	0.0427659
novel-m0205-3p	1.30567	2.47293	2.56333	2.77343	0.357	3.68603	0.921437	0.225919	0.973234	0.125289	1.08689	0.141981	-1.88432	0.260758	1.49728	0.0531466	-0.575846	0.401094	-0.524048	0.623331	-0.410396	0.537276	-3.38161	0.0125398	0.0517978	0.655191	0.16545	0.864107	-2.80576	0.0206606	0.113652	0.94203	-2.85756	0.0104124	-2.97121	0.00926032
novel-m0207-5p	0.7662	0.0846333	0.449733	0.392433	1.23303	0.140667	-3.29679	0.100874	-0.779384	0.731654	-0.97758	0.559764	0.686419	0.267796	-2.51549	0.133473	-0.781304	1	1.7361	0.42103	1.53791	0.554582	3.20191	0.0091241	2.51741	0.306265	2.31921	0.403506	3.98321	0.00415132	-0.198196	1	1.4658	0.191059	1.664	0.0455309
novel-m0211-5p	1.19637	0.01	0.0672333	0.224667	0.2601	0.01	-6.90252	0.00582844	-4.30399	0.042363	-2.45626	0.119341	-2.22013	0.234149	-6.90252	0.012719	0	1	2.59852	1	4.44626	0.686227	4.68239	0.269619	2.59852	1	4.44626	0.490083	4.68239	0.206988	1.84773	0.784679	2.08386	0.542776	0.23613	1
novel-m0212-3p	0.588967	0.472133	0.3078	0.3231	1.2147	0.01	-0.310803	1	-0.943713	0.744559	-0.888096	0.615422	1.05253	0.168158	-5.87193	0.139695	5.56112	0.1077	4.92821	0.408403	4.98383	0.502909	6.92446	0.00183704	-0.63291	0.827395	-0.577293	0.830651	1.36333	0.0508737	0.0556173	1	1.99624	0.0897653	1.94063	0.0374846
novel-m0213-5p	0.509167	0.0846333	0.336067	0.213233	3.08703	0.0876333	-2.69773	0.330747	-0.604296	0.859835	-1.29205	0.562835	2.60949	0.00907223	-2.64326	0.420166	-0.0544706	1	2.03897	0.535831	1.35121	1	5.25275	0.000239393	2.09344	0.39519	1.40568	1	5.30722	3.32182e-05	-0.687759	0.807128	3.21378	0.00466314	3.90154	0.00021788
novel-m0217-5p	0.328733	0.419733	0.2265	0.996033	0.01	0.470067	0.355756	1	-0.544093	1	1.61398	0.247756	-5.02414	0.291347	0.520384	1	-0.164628	1	-1.06448	0.817089	1.0936	0.418615	-5.54453	0.257922	-0.899849	0.8213	1.25822	0.253194	-5.3799	0.230986	2.15807	0.106259	-4.48005	0.404826	-6.63812	0.00834542
novel-m0218-3p	0.01	0.01	0.3319	0.495567	0.701	0.352267	0	1	5.0234	0.393379	5.62127	0.191317	6.13134	0.0258361	5.12488	0.387781	-5.12488	0.251966	-0.101476	1	0.496391	1	1.00646	0.380413	5.0234	0.367469	5.62127	0.155699	6.13134	0.0124691	0.597867	0.880809	1.10794	0.418909	0.510072	0.573109
novel-m0219-3p	0.01	0.01	0.3319	0.495567	0.701	0.352267	0	1	5.0234	0.39326	5.62127	0.19087	6.13134	0.0257035	5.12488	0.388241	-5.12488	0.250388	-0.101476	1	0.496391	1	1.00646	0.380165	5.0234	0.365255	5.62127	0.156868	6.13134	0.0121729	0.597867	0.880551	1.10794	0.418536	0.510072	0.571365
novel-m0220-5p	0.565067	0.595533	0.2265	0.7186	0.181767	1.5923	0.0928833	1	-1.32318	0.746471	0.357182	0.894944	-1.67312	0.780663	1.51174	0.240256	-1.41886	0.209971	-2.83492	0.0255507	-1.15456	0.321167	-3.18486	0.0808606	-1.41606	0.497851	0.264299	0.865358	-1.766	0.538398	1.68036	0.390961	-0.349942	1	-2.0303	0.509405
novel-m0221-5p	9.40423	11.1133	5.26883	11.9414	0.968133	2.57953	0.240901	0.640244	-0.835827	0.347424	0.344594	0.450243	-3.28501	0.00138321	-1.8662	0.0165025	2.1071	6.42664e-05	1.03037	0.101178	2.21079	5.15375e-05	-1.41881	0.326712	-1.07673	0.0744635	0.103693	0.850022	-3.52591	9.77331e-07	1.18042	0.0416555	-2.44918	0.00884101	-3.6296	1.15923e-06
novel-m0222-5p	0.01	0.2904	1.18373	0.996033	2.70293	0.4763	4.84331	0.390252	6.8872	0.00451375	6.63812	0.00901893	8.07838	9.3839e-06	5.5738	0.0959185	-0.730485	0.612541	1.3134	0.302992	1.06432	0.547805	2.50458	0.00394221	2.04389	0.0461793	1.79481	0.0811276	3.23507	3.87897e-05	-0.249078	0.696175	1.19118	0.084036	1.44026	0.00545132
novel-m0223-5p	2.52927	3.9937	5.04313	4.14257	3.58913	1.6026	0.659007	0.245462	0.995601	0.0726508	0.711806	0.286493	0.504916	0.214901	-0.658305	0.779019	1.31731	0.136571	1.65391	0.0434224	1.37011	0.13792	1.16322	0.0962086	0.336594	0.244165	0.052799	1	-0.15409	0.538738	-0.283795	0.367322	-0.490685	0.691828	-0.206889	0.666228
novel-m0224-3p	12.15	19.4088	10.9291	23.9319	5.4142	15.5801	0.675757	0.21369	-0.152777	1	0.977979	0.0472951	-1.16614	0.339388	0.358751	0.578452	0.317006	0.568209	-0.511529	0.634423	0.619227	0.28512	-1.52489	0.237918	-0.828534	0.336164	0.302222	0.455957	-1.84189	0.0161604	1.13076	0.122682	-1.01336	0.338031	-2.14411	0.00107916
novel-m0225-3p	11.1293	18.2563	16.4737	15.1625	5.73227	28.3794	0.714036	0.130785	0.565809	0.147101	0.446146	0.304803	-0.957181	0.419293	1.35049	0.0072728	-0.636451	0.124154	-0.784678	0.239851	-0.904341	0.0280349	-2.30767	0.00120423	-0.148227	0.862399	-0.26789	0.477203	-1.67122	0.0204652	-0.119663	0.519947	-1.52299	0.0205101	-1.40333	0.0493367
novel-m0226-3p	0.7725	0.689767	1.26503	0.255033	0.578733	1.06817	-0.163427	1	0.711569	0.419772	-1.59885	0.272318	-0.416636	1	0.46753	0.555284	-0.630956	0.433459	0.244039	0.913103	-2.06638	0.0613893	-0.884166	0.670269	0.874995	0.265513	-1.43542	0.199628	-0.25321	0.862419	-2.31042	0.0314995	-1.1282	0.4101	1.18221	0.208973
novel-m0230-3p	2.06327	1.40353	1.0252	1.3288	0.0766667	0.4266	-0.555867	0.484953	-1.00902	0.389974	-0.634806	0.441521	-4.88143	0.00363565	-2.28529	0.139303	1.72942	0.218616	1.27627	0.427811	1.65049	0.306806	-2.59614	0.435593	-0.453158	0.797348	-0.0789393	1	-4.32556	0.00561817	0.374219	0.902313	-3.87241	0.0215751	-4.24663	0.01287
novel-m0233-5p	0.1662	0.01	0.899933	0.179267	0.345167	0.140667	-3.99579	0.668631	2.49596	0.159605	0.141171	1	1.09944	0.584008	-0.251625	1	-3.74416	1	2.74759	0.0761434	0.392796	1	1.35106	0.455127	6.49175	0.0161437	4.13696	0.561194	5.09522	0.200508	-2.35479	0.104052	-1.39653	0.425081	0.958264	0.519208
novel-m0235-3p	0.887933	2.466	0.7298	1.86953	1.38503	0.971	1.47365	0.0377398	-0.28295	1	1.07415	0.206208	0.641397	0.313594	0.12902	0.876522	1.34463	0.111636	-0.41197	0.76465	0.945135	0.386382	0.512377	0.388869	-1.7566	0.0493084	-0.399495	0.449752	-0.832252	0.638829	1.35711	0.192658	0.924348	0.316367	-0.432757	1
novel-m0236-3p	0.887933	2.466	0.7298	1.86953	1.38503	0.971	1.47365	0.0371936	-0.28295	1	1.07415	0.205073	0.641397	0.312706	0.12902	0.876362	1.34463	0.111469	-0.41197	0.766534	0.945135	0.386271	0.512377	0.388081	-1.7566	0.0488458	-0.399495	0.448166	-0.832252	0.638192	1.35711	0.191796	0.924348	0.314131	-0.432757	1
novel-m0237-5p	1.2763	2.05293	1.4223	0.606933	0.4943	0.205433	0.685719	0.463838	0.156258	0.684399	-1.07236	0.374441	-1.37827	0.492233	-2.68282	0.0741844	3.36854	0.00863975	2.83908	0.0180266	1.61046	0.430604	1.30455	0.458664	-0.529461	0.691421	-1.75808	0.0372712	-2.06399	0.152555	-1.22862	0.112976	-1.53453	0.301786	-0.305913	1
novel-m0238-3p	1.05587	0.802067	0.1884	0.0793333	0.01	0.283067	-0.396634	0.803152	-2.53853	0.177541	-3.86099	0.0752657	-6.72228	0.0344181	-1.9163	0.306143	1.51967	0.365589	-0.622229	1	-1.94469	0.711817	-4.80598	0.390262	-2.1419	0.343361	-3.46436	0.0767702	-6.32565	0.0311765	-1.32246	0.78322	-4.18375	0.566497	-2.86129	1
novel-m0238-5p	0.427367	0.231267	0.127833	1.27527	0.205167	0.569433	-0.895566	0.82294	-1.80718	0.669796	1.58855	0.203665	-1.07101	0.837092	0.416879	1	-1.31245	0.436435	-2.22406	0.32146	1.17167	0.309487	-1.48789	0.81496	-0.911619	1	2.48412	0.0246153	-0.175447	1	3.39573	0.0234856	0.736172	1	-2.65956	0.0980447
novel-m0240-3p	0.237533	0.880033	0.250567	0.423033	0.01	0.2183	1.9305	0.281604	0.0792299	1	0.862299	0.852512	-4.52899	0.572864	-0.102947	1	2.03345	0.270853	0.182177	1	0.965245	0.770033	-4.42604	0.589916	-1.85127	0.274184	-1.0682	0.377363	-6.45949	0.0190815	0.783069	0.851577	-4.60822	0.542575	-5.39129	0.216842
novel-m0241-3p	1.09703	0.5457	0.4087	0.524867	0.01	1.0792	-1.01188	0.530524	-1.4201	0.396011	-1.06839	0.507012	-6.77307	0.0373526	-0.0192548	1	-0.992622	0.499564	-1.40085	0.392446	-1.04913	0.510725	-6.75382	0.0191941	-0.408226	1	-0.0565091	1	-5.7612	0.0954192	0.351717	1	-5.35297	0.0993538	-5.70469	0.139802
novel-m0242-5p	44.7063	44.8034	32.3836	35.7487	33.4549	69.944	0.00312899	0.942815	-0.465216	0.642563	-0.322588	0.436157	-0.41826	0.852365	0.64572	0.138046	-0.642591	0.0570383	-1.11094	0.0377985	-0.968309	0.00793296	-1.06398	0.313328	-0.468345	0.431922	-0.325717	0.125252	-0.421389	0.781355	0.142627	0.902843	0.0469556	0.589575	-0.0956718	0.278244
novel-m0244-5p	1.54267	0.2442	0.815233	1.1059	0.313767	0.140667	-2.65929	0.0401416	-0.920141	0.53371	-0.480205	0.614111	-2.29766	0.171959	-3.52512	0.0228929	0.86583	0.676175	2.60498	0.101013	3.04492	0.033717	1.22746	0.483842	1.73915	0.163285	2.17909	0.0625526	0.361629	0.779653	0.439936	0.897918	-1.37752	0.421359	-1.81746	0.267675
novel-m0246-3p	0.871167	0.446333	1.06507	0.676667	0.6042	0.140667	-0.975642	0.489851	0.289923	0.708987	-0.371628	0.883152	-0.535904	1	-2.70072	0.0919478	1.72507	0.365979	2.99064	0.0190904	2.32909	0.208724	2.16481	0.138129	1.26557	0.149348	0.604014	0.712005	0.439738	0.520262	-0.661551	0.48253	-0.825827	0.640135	-0.164276	1
novel-m0246-5p	20.7214	16.3263	22.1758	33.9101	25.2838	7.9954	-0.343929	0.428983	0.0978645	0.580206	0.71059	0.126771	0.28709	0.125435	-1.37388	0.03751	1.02995	0.0240344	1.47175	0.00796604	2.08447	4.41e-05	1.66097	8.41928e-05	0.441793	0.112675	1.05452	0.000987688	0.631018	0.00252708	0.612725	0.334294	0.189225	0.435669	-0.4235	0.819055
novel-m0248-5p	20.7214	16.3263	22.1758	33.9101	25.2838	7.9954	-0.343929	0.429148	0.0978645	0.580335	0.71059	0.127284	0.28709	0.125196	-1.37388	0.0377347	1.02995	0.0243225	1.47175	0.00799751	2.08447	4.36076e-05	1.66097	9.53937e-05	0.441793	0.112674	1.05452	0.00100604	0.631018	0.00254317	0.612725	0.334093	0.189225	0.439934	-0.4235	0.819175
novel-m0250-5p	20.7214	16.3263	22.1758	33.9101	25.2838	7.9954	-0.343929	0.429433	0.0978645	0.580004	0.71059	0.12692	0.28709	0.12505	-1.37388	0.0374547	1.02995	0.0242164	1.47175	0.00801387	2.08447	4.21654e-05	1.66097	8.49002e-05	0.441793	0.112389	1.05452	0.000966346	0.631018	0.00256922	0.612725	0.334598	0.189225	0.435314	-0.4235	0.819333
novel-m0252-5p	26.4972	13.6478	21.8805	10.783	9.3153	64.1603	-0.95717	0.0463437	-0.276195	0.924605	-1.29708	0.0136422	-1.50816	0.0800932	1.27584	0.0241869	-2.23301	2.49164e-08	-1.55204	0.00497615	-2.57292	2.45316e-08	-2.78401	4.72678e-05	0.680975	0.015747	-0.33991	0.259094	-0.550994	0.906806	-1.02088	0.0061249	-1.23197	0.0496404	-0.211084	0.517699
novel-m0258-3p	1.01797	0.2047	0.0672333	0.179267	0.181767	0.01	-2.33779	0.101125	-4.07102	0.0907511	-2.53259	0.138949	-2.53944	0.30456	-6.66955	0.0299038	4.33175	0.566752	2.59852	1	4.13696	0.557959	4.13011	0.577875	-1.73323	0.705347	-0.194796	1	-0.201646	1	1.53843	1	1.53158	0.799528	-0.00684977	1
novel-m0259-3p	1.01797	0.2047	0.0672333	0.179267	0.181767	0.01	-2.33779	0.10121	-4.07102	0.0898249	-2.53259	0.138957	-2.53944	0.303442	-6.66955	0.0297463	4.33175	0.566956	2.59852	1	4.13696	0.559257	4.13011	0.575832	-1.73323	0.704403	-0.194796	1	-0.201646	1	1.53843	1	1.53158	0.799907	-0.00684977	1
novel-m0260-3p	1.01797	0.2047	0.0672333	0.179267	0.181767	0.01	-2.33779	0.101538	-4.07102	0.0905578	-2.53259	0.138711	-2.53944	0.305564	-6.66955	0.0300029	4.33175	0.56616	2.59852	1	4.13696	0.558393	4.13011	0.576513	-1.73323	0.705392	-0.194796	1	-0.201646	1	1.53843	1	1.53158	0.79899	-0.00684977	1
novel-m0262-3p	0.4853	1.16963	2.66477	0.447233	6.51033	17.1552	1.28906	0.270275	2.47702	0.0147831	-0.108686	1	3.76574	3.01402e-06	5.16358	8.2636e-07	-3.87452	3.33302e-08	-2.68656	0.000757722	-5.27227	5.87346e-10	-1.39784	0.201907	1.18795	0.0518721	-1.39775	0.147676	2.47668	2.87212e-08	-2.5857	0.0016474	1.28872	0.014027	3.87442	1.97326e-10
novel-m0264-3p	4.0513	7.54283	6.37227	6.87427	1.37047	5.37633	0.896722	0.0630295	0.653422	0.160924	0.762821	0.154467	-1.56372	0.155571	0.408238	0.414911	0.488484	0.403897	0.245184	0.601747	0.354583	0.664016	-1.97196	0.0410201	-0.2433	0.939644	-0.133901	0.703691	-2.46044	0.000523029	0.109399	0.94208	-2.21714	0.0056144	-2.32654	0.00395192
novel-m0266-3p	3.32683	2.99543	1.26883	2.01617	0.6392	1.27577	-0.151385	0.947841	-1.39065	0.203527	-0.722535	0.32368	-2.37981	0.0433699	-1.38279	0.121975	1.2314	0.0746663	-0.00786191	1	0.66025	0.556662	-0.997025	0.681073	-1.23926	0.118906	-0.57115	0.194944	-2.22843	0.0231566	0.668112	0.620799	-0.989163	0.517654	-1.65728	0.223793
novel-m0267-5p	0.957233	1.1353	0.631467	0.604	0.5856	0.01	0.246131	0.888078	-0.6078	0.792731	-0.672306	0.657007	-0.708955	1	-6.5808	0.0279915	6.82693	0.00214168	5.973	0.0901694	5.90849	0.0814353	5.87184	0.0388621	-0.853931	0.581248	-0.918437	0.395077	-0.955086	0.676061	-0.0645062	1	-0.101155	1	-0.0366491	0.76047
novel-m0268-3p	0.0864333	0.410467	0.0917333	0.343933	0.815667	0.0876333	2.36341	0.339143	0.0928079	1	2.09422	0.554619	3.35412	0.0318872	0.0215421	1	2.34187	0.449072	0.0712658	1	2.07268	0.724397	3.33258	0.0300368	-2.2706	0.331277	-0.269187	1	0.990715	0.173267	2.00141	0.565769	3.26131	0.027721	1.2599	0.163117
novel-m0269-3p	0.482767	0.318533	0.127833	0.01	0.892533	0.656667	-0.630397	0.84958	-1.99433	0.59947	-5.59325	0.142613	0.88658	0.202072	0.443835	0.695417	-1.07423	0.415679	-2.43817	0.123719	-6.03709	0.0294686	0.442745	0.550411	-1.36394	0.835064	-4.96286	0.365358	1.51698	0.127128	-3.59892	0.70979	2.88091	0.053901	6.47983	0.00197312
novel-m0271-3p	0.799667	0.5457	0.5758	0.437433	1.1349	0.0876333	-0.56013	0.875522	-0.490632	0.903972	-0.870336	0.579956	0.505095	0.42989	-3.304	0.145305	2.74387	0.271539	2.81337	0.369965	2.43366	0.458433	3.80909	0.0107278	0.0694982	1	-0.310205	0.828005	1.06522	0.177628	-0.379704	0.875992	0.995727	0.356695	1.37543	0.0886798
novel-m0272-5p	2.03623	5.1008	1.76653	3.07887	1.04093	1.01443	1.32482	0.0246449	-0.207707	1	0.596497	0.370298	-0.968025	0.65488	-1.00523	0.325845	2.33005	0.000319415	0.797522	0.477146	1.60173	0.0579191	0.0372036	0.567454	-1.53253	0.0511857	-0.728324	0.101815	-2.29285	0.00326062	0.804203	0.432469	-0.760318	0.657695	-1.56452	0.157189
novel-m0275-3p	0.9236	0.3975	0.616533	0.471367	0.01	0.01	-1.22846	0.378227	-0.583089	0.867615	-0.980657	0.461147	-6.5292	0.0178413	-6.5292	0.0182791	5.30073	0.228085	5.94611	0.0523193	5.54854	0.185613	0	1	0.645373	0.687464	0.247806	1	-5.30073	0.206544	-0.397568	0.700183	-5.94611	0.0477785	-5.54854	0.205855
novel-m0277-3p	2.2649	2.30747	2.1581	1.46253	4.2295	0.01	0.0268625	1	-0.0696856	0.83184	-0.630978	0.439447	0.90104	0.0289292	-7.8233	0.000249408	7.85017	1.84141e-05	7.75362	0.000187446	7.19233	0.00200539	8.72434	3.52956e-08	-0.0965481	0.934711	-0.65784	0.208411	0.874177	0.00755755	-0.561292	0.307564	0.970725	0.0896294	1.53202	0.00100376
novel-m0278-5p	0.6717	1.1456	0.270133	0.255033	0.356733	0.411567	0.770214	0.456452	-1.33206	0.703001	-1.39713	0.481381	-0.940187	1	-0.730251	1	1.50047	0.390559	-0.601807	0.84724	-0.66688	0.827934	-0.209936	1	-2.10227	0.115087	-2.16735	0.0369542	-1.7104	0.481978	-0.0650728	1	0.391871	1	0.456944	0.718034
novel-m0282-5p	0.568833	0.318533	0.346933	0.4585	0.01	0.691233	-0.867077	0.719968	-0.74134	1	-0.321611	0.852709	-5.82993	0.103348	0.281167	0.855102	-1.14824	0.417385	-1.02251	0.606785	-0.602778	0.688762	-6.1111	0.0420643	0.125736	1	0.545466	1	-4.96286	0.433786	0.419729	1	-5.08859	0.35467	-5.50832	0.20755
novel-m0285-3p	7.2875	8.05253	4.7318	3.77937	3.17863	4.76663	0.144019	0.808339	-0.623035	0.647756	-0.947279	0.158192	-1.19702	0.410324	-0.612453	0.543874	0.756472	0.19898	-0.0105816	1	-0.334826	0.463494	-0.584564	0.89585	-0.767054	0.282006	-1.0913	0.0144871	-1.34104	0.210228	-0.324245	0.428471	-0.573982	0.566434	-0.249738	0.670398
novel-m0290-3p	4.54867	4.43687	2.44593	2.53783	1.24347	2.36163	-0.0359025	1	-0.895059	0.329375	-0.841846	0.135831	-1.87108	0.0560768	-0.945659	0.221471	0.909756	0.176256	0.0506001	0.832193	0.103812	1	-0.925417	0.74219	-0.859156	0.26367	-0.805944	0.0934408	-1.83517	0.0386918	0.0532122	0.869953	-0.976017	0.324422	-1.02923	0.46344
novel-m0291-3p	0.01	0.654633	0.0672333	0.515367	0.1234	0.2993	6.03262	0.0357067	2.59852	1	5.66874	0.241965	3.54514	0.71737	4.88736	0.3915	1.14525	0.641835	-2.28884	0.720194	0.78138	0.863393	-1.34222	1	-3.43409	0.110727	-0.363872	1	-2.48747	0.243677	3.07022	0.431857	0.946621	1	-2.1236	0.611996
novel-m0293-3p	1.05297	1.65627	0.785033	0.684533	0.495733	0.205433	0.65805	0.543467	-0.41906	1	-0.623735	0.809316	-1.08225	0.705639	-2.40074	0.257338	3.05879	0.00678477	1.98168	0.209764	1.777	0.38969	1.31849	0.342628	-1.07711	0.319267	-1.28178	0.0867206	-1.7403	0.170318	-0.204675	0.782824	-0.66319	0.780177	-0.458514	1
novel-m0296-5p	150.268	202.571	172.507	262.905	190.461	1.9162	0.430889	0.176608	0.199111	0.352172	0.807001	0.0395664	0.341956	0.0746237	-6.29315	1.86715e-18	6.72404	6.84552e-37	6.49226	4.30353e-22	7.10015	2.15735e-32	6.63511	7.83225e-25	-0.231777	0.943174	0.376113	0.17141	-0.0889331	0.174145	0.60789	0.253202	0.142844	0.446425	-0.465046	0.890428
novel-m0299-5p	1.09703	1.44377	1.25217	1.5368	0.837667	4.6077	0.400621	0.751665	0.19521	0.761467	0.490712	0.662743	-0.390521	1	2.07483	0.0120747	-1.67421	0.00996742	-1.87962	0.0119831	-1.58412	0.00693868	-2.46535	0.0365568	-0.205411	1	0.0900918	1	-0.791142	0.678411	0.295503	1	-0.585731	0.769987	-0.881234	0.74147
novel-m0302-3p	0.578467	0.406033	1.9381	0.343933	0.1467	0.461233	-0.514191	0.860746	1.75267	0.173484	-0.755818	0.722076	-2.03813	0.567117	-0.328864	1	-0.185327	1	2.08154	0.192941	-0.426954	0.661069	-1.70926	0.552968	2.26687	0.0744403	-0.241627	1	-1.52394	0.835894	-2.50849	0.0552714	-3.7908	0.0343816	-1.28231	1
novel-m0303-5p	6.28047	10.2136	5.7168	13.5024	5.7573	4.1741	0.701548	0.140681	-0.135664	0.945905	1.10427	0.0298815	-0.125479	0.545975	-0.589407	0.450572	1.29095	0.00921547	0.453743	0.396668	1.69368	0.000840535	0.463927	0.118092	-0.837212	0.181223	0.402721	0.240966	-0.827027	0.506997	1.23993	0.0255319	0.0101846	0.726736	-1.22975	0.113265
novel-m0306-3p	3.32683	2.99543	1.26883	2.01617	0.6392	1.27577	-0.151385	0.94773	-1.39065	0.202957	-0.722535	0.323398	-2.37981	0.0428409	-1.38279	0.121357	1.2314	0.0743439	-0.00786191	1	0.66025	0.55629	-0.997025	0.681176	-1.23926	0.117321	-0.57115	0.194437	-2.22843	0.0229186	0.668112	0.620612	-0.989163	0.517133	-1.65728	0.223152
novel-m0307-5p	3.32683	2.99543	1.26883	2.01617	0.6392	1.27577	-0.151385	0.947929	-1.39065	0.204401	-0.722535	0.324351	-2.37981	0.0437874	-1.38279	0.122277	1.2314	0.0752534	-0.00786191	1	0.66025	0.557193	-0.997025	0.682204	-1.23926	0.121274	-0.57115	0.19571	-2.22843	0.0235548	0.668112	0.621562	-0.989163	0.518476	-1.65728	0.225191
novel-m0309-3p	0.6478	1.30153	1.0045	1.18973	1.8924	0.604067	1.01403	0.339455	0.6403	0.532207	0.884461	0.417544	1.55404	0.0618811	-0.101381	1	1.11542	0.251837	0.741681	0.416332	0.985842	0.400924	1.65542	0.0383713	-0.373735	0.893609	-0.129574	0.876731	0.540005	0.160921	0.244161	1	0.91374	0.208639	0.669579	0.156489
novel-m0313-3p	1.04017	0.578233	0.6571	1.3284	1.3826	0.283067	-0.850801	0.626588	-0.672711	0.785005	0.353881	0.856772	0.4152	0.418256	-1.89006	0.320579	1.03926	0.641259	1.21735	0.63086	2.24394	0.151985	2.30526	0.0326851	0.17809	0.903938	1.20468	0.3804	1.266	0.0870082	1.02659	0.593428	1.08791	0.312889	0.0613189	0.534139
novel-m0314-3p	1.81767	0.220967	0.493767	0.7281	0.275167	0.5757	-3.06212	0.00867044	-1.88019	0.184639	-1.31988	0.166663	-2.74129	0.123393	-1.6587	0.233502	-1.40342	0.280629	-0.221488	1	0.338819	1	-1.08259	0.822483	1.18193	0.488608	1.74224	0.245101	0.320823	0.829386	0.560307	0.854501	-0.861107	0.701222	-1.42141	0.710883
novel-m0315-5p	8.31023	6.94553	8.53607	6.78703	7.61697	14.013	-0.258804	0.590499	0.0386825	0.607922	-0.292108	0.564369	-0.125672	0.483861	0.753808	0.120182	-1.01261	0.0109401	-0.715126	0.281245	-1.04592	0.0113242	-0.879481	0.465096	0.297486	0.299709	-0.0333044	0.87444	0.133131	0.112552	-0.33079	0.327793	-0.164355	0.966117	0.166435	0.130702
novel-m0324-5p	0.01	0.474467	0.254767	0.7168	0.7607	0.314333	5.54782	0.298786	4.6521	0.397941	6.1635	0.0423739	6.24926	0.011193	4.97422	0.298366	0.573597	1	-0.322119	1	1.18928	0.496038	1.27503	0.143801	-0.895716	0.876867	0.615679	0.752337	0.701436	0.321182	1.51139	0.304507	1.59715	0.15291	0.085757	0.543474
novel-m0327-5p	0.770333	0.01	0.01	0.01	0.271733	0.6762	-6.26741	0.0326329	-6.26741	0.0585913	-6.26741	0.0390321	-1.5211	0.746801	-0.195162	1	-6.07225	0.0652241	-6.07225	0.079902	-6.07225	0.0660827	-1.32594	0.621535	0	1	0	1	4.74631	0.238156	0	1	4.74631	0.30854	4.74631	0.234881
novel-m0328-5p	2.40767	3.1181	2.74057	5.68267	1.43087	1.53753	0.373032	0.610091	0.186839	0.712551	1.23893	0.0199347	-0.750746	0.884793	-0.650149	0.495182	1.02318	0.208927	0.836988	0.401342	1.88908	0.00725285	-0.100597	0.59038	-0.186193	1	0.865901	0.050725	-1.12378	0.537425	1.05209	0.291392	-0.937585	0.456266	-1.98968	0.0218119
novel-m0329-5p	1.64783	0.786533	0.6033	0.0857667	0.1467	0.0876333	-1.07312	0.318098	-1.44962	0.301439	-4.38075	0.00427592	-3.55673	0.0319301	-4.3471	0.0107481	3.27398	0.187295	2.89748	0.180545	-0.0336504	1	0.79037	1	-0.376505	1	-3.30763	0.142755	-2.48361	0.523134	-2.93113	0.138826	-2.10711	0.31556	0.824021	0.801937
novel-m0332-5p	2.81507	2.06767	0.4481	1.9981	0.8553	0.3048	-0.445165	0.679229	-2.66205	0.0366816	-0.49454	0.726809	-1.7243	0.354123	-3.23914	0.0236253	2.79397	0.0265161	0.577091	0.84594	2.7446	0.0459723	1.51484	0.239393	-2.21688	0.0796906	-0.0493748	0.941803	-1.27913	0.580303	2.16751	0.111215	0.937748	0.501717	-1.22976	0.618115
novel-m0338-5p	0.01	0.484	0.250567	0.358333	0.4971	0.264667	5.58696	0.124138	4.60822	0.503423	5.16323	0.22384	5.63546	0.0427006	4.70782	0.39034	0.879146	0.63799	-0.0996014	1	0.455411	1	0.927645	0.474046	-0.978747	0.702979	-0.423735	0.809222	0.0484993	0.849274	0.555012	1	1.02725	0.458548	0.472234	0.514378
novel-m0340-3p	0.0927333	0.7241	0.336067	0.01	0.130267	0.283067	3.07266	0.162341	1.95084	0.557857	-3.10545	1	0.522152	1	1.70053	0.726934	1.37214	0.495054	0.250314	1	-4.80598	0.35989	-1.17837	1	-1.12182	0.71842	-6.17812	0.0309893	-2.55051	0.297645	-5.05629	0.264967	-1.42869	0.806534	3.62761	0.723007
novel-m0341-3p	0.393733	0.5243	0.4913	0.616867	1.18303	0.140667	0.416238	1	0.311941	0.880288	0.652189	0.711649	1.59947	0.0711985	-1.54272	0.546061	1.95896	0.369243	1.85466	0.433007	2.19491	0.214197	3.14219	0.00495269	-0.104297	1	0.235951	0.862249	1.18323	0.0790415	0.340248	1	1.28753	0.288612	0.947277	0.141092
novel-m0342-3p	1.50847	1.8225	1.5226	3.02393	0.4188	5.47633	0.276028	0.783945	0.0134838	0.941583	1.00654	0.238953	-1.85709	0.345395	1.86332	0.0134921	-1.58729	0.00222794	-1.84984	0.0254626	-0.856784	0.0816568	-3.72041	0.000239773	-0.262544	1	0.730508	0.196156	-2.13311	0.09172	0.993051	0.305431	-1.87057	0.282253	-2.86362	0.0080145
novel-m0342-5p	1.59323	1.46347	1.03057	1.84677	0.01	0.330567	-0.122568	1	-0.62852	0.674286	0.213044	0.829973	-7.31581	0.00198984	-2.29834	0.197106	2.17577	0.152051	1.66982	0.293579	2.51138	0.0661194	-5.01748	0.391277	-0.505952	0.73736	0.335612	0.704976	-7.19325	0.00109494	0.841564	0.439956	-6.68729	0.00885896	-7.52886	0.00025453
novel-m0344-3p	0.619233	0.488433	0.616533	1.18347	0.784	0.01	-0.342321	1	-0.00630424	1	0.934464	0.359137	0.340371	0.555637	-5.95241	0.0854108	5.61009	0.0956006	5.94611	0.0516733	6.88688	0.00321077	6.29278	0.0119036	0.336017	0.838115	1.27679	0.150577	0.682692	0.33411	0.940768	0.454957	0.346675	0.668833	-0.594094	1
novel-m0348-3p	0.0864333	0.4223	0.631867	0.1551	1.26387	0.691233	2.39298	0.386337	2.98576	0.145106	0.927997	1	3.9821	0.0231211	3.11531	0.132385	-0.722337	0.685776	-0.129553	1	-2.18732	0.0966388	0.86679	0.304765	0.592785	0.566	-1.46498	0.558122	1.58913	0.0985773	-2.05777	0.171196	0.996342	0.363986	3.05411	0.0261003
novel-m0350-5p	0.01	0.0846333	0.01	1.12367	0.240133	0.205433	2.96286	1	0	1	6.81207	0.00469666	4.54514	0.42627	4.313	0.695423	-1.35015	1	-4.313	0.666629	2.49907	0.0585161	0.232141	0.852938	-2.96286	1	3.84921	0.0074732	1.58229	0.645431	6.81207	0.004482	4.54514	0.438781	-2.26693	0.20712
novel-m0351-3p	0.0864333	0.7189	0.7945	1.4933	1.38143	0.404167	3.17193	0.109966	3.31619	0.0881534	4.22657	0.00402885	4.11424	0.00258491	2.3171	0.637355	0.854836	0.584573	0.999092	0.500429	1.90948	0.0895854	1.79714	0.0603156	0.144256	0.881168	1.05464	0.212633	0.942303	0.112555	0.910385	0.433808	0.798047	0.279583	-0.112338	0.593351
novel-m0354-5p	0.440833	0.5501	0.01	0.213233	0.438733	0.140667	0.319461	1	-5.46216	0.13848	-1.09363	0.605799	-0.006889	0.839932	-1.718	0.482599	2.03746	0.192145	-3.74416	1	0.624374	1	1.71111	0.152085	-5.78162	0.0421086	-1.41309	0.277364	-0.32635	1	4.36854	0.714999	5.45527	0.0520314	1.08674	0.329636
novel-m0355-3p	0.5838	0.367567	0.4481	0.251933	0.657133	0.01	-0.650899	0.743021	-0.375856	0.898437	-1.21508	0.649825	0.187281	0.83341	-5.85083	0.272274	5.19993	0.185057	5.47498	0.220315	4.63575	0.369491	6.03811	0.0334091	0.275043	0.831469	-0.56418	0.771607	0.83818	0.312795	-0.839222	0.687697	0.563137	0.695233	1.40236	0.237583
novel-m0356-5p	1.4904	1.17297	2.14893	3.49013	7.92203	2.83357	-0.345538	0.82766	0.527921	0.36238	1.22758	0.089602	2.41017	2.3212e-05	0.92692	0.238011	-1.27246	0.128675	-0.398998	0.78432	0.300663	0.780914	1.48325	0.00236875	0.873459	0.185815	1.57312	0.0122608	2.75571	2.55189e-08	0.699661	0.51681	1.88225	0.00185546	1.18259	0.00105296
novel-m0357-3p	0.169167	0.451467	0.266367	1.02023	0.196933	0.01	1.43419	0.49467	0.665512	1	2.62109	0.0564376	0.223345	1	-4.05166	0.548945	5.48586	0.139168	4.71717	0.379742	6.67276	0.00551682	4.27501	0.394437	-0.768682	0.850282	1.1869	0.377004	-1.21085	0.685379	1.95558	0.189758	-0.442167	1	-2.39775	0.115704
novel-m0358-3p	3.56643	6.02353	2.17373	3.7406	4.08457	2.22327	0.756128	0.12607	-0.714307	0.531614	0.0687877	0.948586	0.195701	0.286566	-0.681801	0.40429	1.43793	0.0153877	-0.032506	1	0.750589	0.290769	0.877502	0.049426	-1.47044	0.0165694	-0.68734	0.0584626	-0.560427	1	0.783095	0.357326	0.910008	0.0882157	0.126913	0.210773
novel-m0359-5p	0.2783	2.23293	1.49823	2.3603	4.4846	0.743133	3.02161	0.00143984	2.44593	0.0272284	3.10164	0.00238198	4.02765	2.62752e-06	1.42788	0.37742	1.59373	0.0954007	1.01806	0.358229	1.67376	0.103828	2.59977	0.000341373	-0.575678	0.620846	0.0800301	1	1.00604	0.00462875	0.655708	0.515456	1.58172	0.00712728	0.926009	0.0135165
novel-m0361-5p	0.7116	0.837933	1.05347	1.45627	1.60907	0.2496	0.230018	1	0.566006	0.5315	1.03314	0.297308	1.17709	0.138731	-1.55051	0.576096	1.78052	0.614681	2.11651	0.14679	2.58364	0.0617061	2.72759	0.0419721	0.335988	0.61669	0.803118	0.352198	0.947067	0.123156	0.46713	0.803948	0.611079	0.416041	0.14395	0.450683
novel-m0362-5p	0.01	0.1626	0.0672333	0.489133	0.4222	0.8967	3.96286	0.679453	2.59852	1	5.60229	0.193106	5.38842	0.145635	6.48655	0.0229157	-2.5237	0.169087	-3.88803	0.0786509	-0.884263	0.575413	-1.09813	0.738241	-1.36433	1	1.63943	0.52625	1.42556	0.405097	3.00377	0.452407	2.7899	0.272953	-0.213871	1
upregulated
downregulated
