# Supplementary material for: Small RNA and Degradome Sequencing in Floral Bud Reveal Roles of miRNAs in Dormancy Release of Chimonanthus praecox
Source: Int J Mol Sci. 2023 Feb 20;24(4):4210. doi: 10.3390/ijms24044210 (PMC9964840; doi:10.3390/ijms24044210)
Supplement: Supplementary file 1 [file ijms-24-04210-s001.zip › Table S8. 23 shared differentially expressed miRNAs identified among five groups.xlsx]

## Sheet: Table S8
Table S8. 23 shared differentially expressed miRNAs identified among five groups
id	expression level (TPM)						IB570/nF16		IB570/FB.Nov		IB570/FB150		IB570/FB300		IB570/FB450
	FB.Nov_TPM	FB150_TPM	FB300_TPM	FB450_TPM	IB570_TPM	nF16_TPM	log2(FC)	PValue	log2(FC)	PValue	log2(FC)	PValue	log2(FC)	PValue	log2(FC)	PValue
miR157-y	25.7878	40.6561	9.64763	23.2873	2.36397	13.4171	-2.50479	0.0029668	-3.44741	2.16756e-06	-4.10419	1.9411e-12	-2.02897	0.00379746	-3.30026	1.05758e-07
miR167-x	73728.5	80973.9	62032.6	69941	21145.2	58654.8	-1.47192	0.0455125	-1.80189	0.0104727	-1.93712	3.11876e-06	-1.55269	0.00231226	-1.72581	0.000391135
miR167-y	218.325	146.313	76.1988	168.532	28.7297	151.843	-2.40197	0.00040492	-2.92586	7.76354e-05	-2.34844	3.22281e-07	-1.40723	0.0104667	-2.55241	3.15162e-07
miR2092-x	0.0864333	0.644367	1.0004	0.495567	3.2519	1.21103	1.42504	0.0269259	5.34935	4.32394e-05	2.33533	0.000576472	1.70071	0.039342	2.72387	0.00123464
miR390-y	45.1982	33.3788	28.3988	30.959	11.9222	49.0791	-2.04146	0.00286053	-1.92261	0.00701239	-1.48528	0.00864806	-1.25218	0.0381711	-1.37671	0.0381534
miR395-y	27.2377	18.8771	29.1153	43.325	1.77907	44.8593	-4.65622	1.76574e-09	-3.93641	5.69416e-08	-3.40744	3.30888e-09	-4.03258	9.19962e-06	-4.60601	1.67722e-12
miR473-x	0.01	0.426733	0.01	0.2342	1.16437	0.370667	1.66438	0.0384445	6.8634	0.0019558	1.44814	0.0492544	6.8634	0.00135839	2.33441	0.0251355
miR5179-x	1.4294	0.6469	0.249	0.4585	32.984	0.408633	6.35855	1.30701e-14	4.52829	3.64978e-13	5.67208	2.7708e-26	7.08863	1.02986e-16	6.17923	6.94899e-24
miR6293-x	0.0927333	0.01	0.169267	0.01	1.85987	0.01	7.53906	9.14023e-05	4.4336	0.000386871	7.53906	5.50991e-06	3.5158	0.0014781	7.53906	8.2998e-06
miR9566-y	0.01	0.01	0.01	0.01	2.51547	0.01	7.97468	1.17629e-05	7.97468	9.45219e-06	7.97468	2.28128e-07	7.97468	6.39977e-06	7.97468	7.07741e-07
novel-m0010-5p	18.7274	22.2751	18.4815	19.8189	47.9529	12.096	1.98709	1.09861e-05	1.35647	0.00135895	1.10619	0.000313976	1.37554	0.00201434	1.27474	0.000128776
novel-m0011-5p	18.7274	22.2751	18.4815	19.8189	47.9529	12.096	1.98709	1.11711e-05	1.35647	0.00137224	1.10619	0.000317936	1.37554	0.00203044	1.27474	0.000126748
novel-m0059-3p	0.2783	0.440367	0.449733	0.4198	2.31177	0.140667	4.10869	0.00013242	3.07167	0.00107405	2.40318	0.000684493	2.37259	0.0088246	2.48432	0.00301237
novel-m0077-5p	76.872	74.085	26.9046	35.2675	3.77093	23.4585	-2.63712	0.000614017	-4.34946	1.3456e-07	-4.29619	3.25608e-18	-2.83486	4.55834e-06	-3.22535	7.4092e-09
novel-m0082-5p	18.9721	32.2359	15.0758	60.198	2.6923	15.9786	-2.56923	0.0142125	-2.81697	0.00106574	-3.58176	7.21333e-09	-2.48532	0.00340203	-4.4828	4.39017e-09
novel-m0095-5p	0.255233	0.0846333	0.724467	0.4022	2.623	0.0876333	5.01775	0.000537388	3.38029	0.00236803	5.07222	0.00010632	1.85623	0.0479619	2.72935	0.00395412
novel-m0103-5p	0.01	0.568933	0.6826	0.297333	2.78117	0.2993	3.23218	0.00117844	8.11955	7.35443e-06	2.28936	0.000661936	2.03364	0.0159179	3.25825	0.000100421
novel-m0105-3p	3.5935	6.0296	8.4747	4.31827	26.8277	3.0345	3.14419	3.38873e-09	2.90026	1.82269e-08	2.15359	4.57776e-10	1.66249	0.000433547	2.6352	6.22901e-12
novel-m0128-3p	0.733867	1.43867	2.0178	1.50617	16.7888	0.5823	4.8496	8.94573e-12	4.52241	4.77529e-10	3.5447	8.85608e-16	3.05665	2.87754e-07	3.47855	7.39742e-14
novel-m0182-5p	266.922	271.303	141.988	186.045	50.5807	192.628	-1.92915	0.00419568	-2.39976	0.000550607	-2.42325	7.58239e-08	-1.4891	0.00763498	-1.87899	0.000261985
novel-m0186-3p	0.01	0.644367	0.888833	0.3246	3.01753	0.5293	2.51121	0.000962507	8.23723	7.69964e-07	2.22742	6.57781e-05	1.76881	0.022209	3.23153	1.19609e-05
novel-m0213-5p	0.509167	0.0846333	0.336067	0.213233	3.08703	0.0876333	5.25275	0.000239393	2.60949	0.00907223	5.30722	3.32182e-05	3.21378	0.00466314	3.90154	0.00021788
novel-m0356-5p	1.4904	1.17297	2.14893	3.49013	7.92203	2.83357	1.48325	0.00236875	2.41017	2.3212e-05	2.75571	2.55189e-08	1.88225	0.00185546	1.18259	0.00105296
upregulated
downregulated
