# Supplementary material for: Small RNA and Degradome Sequencing in Floral Bud Reveal Roles of miRNAs in Dormancy Release of Chimonanthus praecox
Source: Int J Mol Sci. 2023 Feb 20;24(4):4210. doi: 10.3390/ijms24044210 (PMC9964840; doi:10.3390/ijms24044210)
Supplement: Supplementary file 1 [file ijms-24-04210-s001.zip › Table S9. Statistics of miRNA-target pairs identified.xlsx]

## Sheet: Table S9
Table S9. Statistics of miRNA-target pairs identified
Site Type	miRNA-target pairs	percent	cleavage sites Count	Genes Count	miRNAs Count
Category 0	1374	0.00594834	1279	1279	480
Category 1	1312	0.00567992	1252	1189	484
Category 2	98246	0.425328	94552	19980	1097
Category 3	8170	0.0353696	7936	1910	806
Category 4	121887	0.527674	115548	29687	1116
total	230989	1	220567	33310	1186
