# Supplementary material for: Small RNA and Degradome Sequencing in Floral Bud Reveal Roles of miRNAs in Dormancy Release of Chimonanthus praecox
Source: Int J Mol Sci. 2023 Feb 20;24(4):4210. doi: 10.3390/ijms24044210 (PMC9964840; doi:10.3390/ijms24044210)
Supplement: Supplementary file 1 [file ijms-24-04210-s001.zip › Table S10. 1707 target genes predicted by Degradome Sequencing.xlsx]

## Sheet: Table S10
Table S10. 1707 target genes predicted by Degradome Sequencing
mRNA	symbol	Nr-annotation	ko-definition	biological-process	cellular-component	molecular-function
Unigene0000123	-	--	-	-	-	-
Unigene0000143	-	--	-	-	-	-
Unigene0000160	PP2C	PREDICTED: probable protein phosphatase 2C 27 [Nelumbo nucifera]	-	GO:0043229//intracellular organelle;GO:0044464//cell part;GO:0043227//membrane-bounded organelle;GO:0043231//intracellular membrane-bounded organelle;GO:0005622//intracellular;GO:0043226//organelle;GO:0005623//cell;GO:0044424//intracellular part	GO:0016787//hydrolase activity;GO:0003824//catalytic activity;GO:0016788//hydrolase activity, acting on ester bonds;GO:0004721//phosphoprotein phosphatase activity;GO:0005488//binding;GO:0016791//phosphatase activity;GO:0042578//phosphoric ester hydrolase activity;GO:0043167//ion binding;GO:0043169//cation binding	GO:0050794//regulation of cellular process;GO:0036211//protein modification process;GO:0009628//response to abiotic stimulus;GO:0006970//response to osmotic stress;GO:0050789//regulation of biological process;GO:0010033//response to organic substance;GO:0010468//regulation of gene expression;GO:0006357//regulation of transcription from RNA polymerase II promoter;GO:0043618//regulation of transcri…
Unigene0000257	Os06g0675700	PREDICTED: alpha-glucosidase [Nelumbo nucifera]	ko01100//Metabolic pathways//Global and Overview//Metabolism;ko00500//Starch and sucrose metabolism//Carbohydrate metabolism//Metabolism;ko00052//Galactose metabolism//Carbohydrate metabolism//Metabolism	-	GO:0016798//hydrolase activity, acting on glycosyl bonds;GO:0003824//catalytic activity;GO:0004553//hydrolase activity, hydrolyzing O-glycosyl compounds;GO:0016787//hydrolase activity;GO:0090599//alpha-glucosidase activity;GO:0015926//glucosidase activity;GO:0005488//binding	GO:0044238//primary metabolic process;GO:0008152//metabolic process
Unigene0000260	-	--	-	-	-	-
Unigene0000265	TIC62	PREDICTED: protein TIC 62, chloroplastic isoform X2 [Vitis vinifera]	-	-	-	-
Unigene0000445	At4g17486	PREDICTED: deSI-like protein At4g17486 [Vitis vinifera]	-	-	-	-
Unigene0000464	-	PREDICTED: uncharacterized protein LOC104594586 isoform X1 [Nelumbo nucifera]	-	-	-	-
Unigene0000479	At1g22040	PREDICTED: F-box/kelch-repeat protein At1g22040-like [Nelumbo nucifera]	-	-	-	-
Unigene0000602	-	--	-	-	-	-
Unigene0000741	-	--	-	-	-	-
Unigene0000941	PDCD11	PREDICTED: rRNA biogenesis protein RRP5 isoform X2 [Nelumbo nucifera]	-	-	-	-
Unigene0001007	At4g25210	PREDICTED: STOREKEEPER protein-like [Nelumbo nucifera]	-	-	-	-
Unigene0001026	RNU1	PREDICTED: U1 small nuclear ribonucleoprotein 70 kDa-like [Nelumbo nucifera]	ko03040//Spliceosome//Transcription//Genetic Information Processing	-	-	-
Unigene0001045	HSL1	PREDICTED: receptor-like protein kinase HSL1 [Ziziphus jujuba]	-	GO:0016020//membrane	GO:1901363//heterocyclic compound binding;GO:0036094//small molecule binding;GO:0004672//protein kinase activity;GO:0005488//binding;GO:0097159//organic cyclic compound binding;GO:0016301//kinase activity;GO:0016740//transferase activity;GO:0016773//phosphotransferase activity, alcohol group as acceptor;GO:0003824//catalytic activity;GO:0016772//transferase activity, transferring phosphorus-conta…	GO:0044260//cellular macromolecule metabolic process;GO:0044237//cellular metabolic process;GO:0006793//phosphorus metabolic process;GO:0019538//protein metabolic process;GO:0008152//metabolic process;GO:0006796//phosphate-containing compound metabolic process;GO:0006464//cellular protein modification process;GO:0016310//phosphorylation;GO:0044267//cellular protein metabolic process;GO:0009987//c…
Unigene0001146	UPF2	PREDICTED: regulator of nonsense transcripts UPF2 isoform X1 [Nelumbo nucifera]	ko03013//RNA transport//Translation//Genetic Information Processing;ko03015//mRNA surveillance pathway//Translation//Genetic Information Processing	GO:0005622//intracellular;GO:0043228//non-membrane-bounded organelle;GO:0044464//cell part;GO:0043227//membrane-bounded organelle;GO:0005623//cell;GO:0044444//cytoplasmic part;GO:0044424//intracellular part;GO:0043232//intracellular non-membrane-bounded organelle;GO:0043226//organelle;GO:0005737//cytoplasm;GO:0043229//intracellular organelle;GO:0043231//intracellular membrane-bounded organelle	GO:0005488//binding;GO:1901363//heterocyclic compound binding;GO:0003676//nucleic acid binding;GO:0097159//organic cyclic compound binding	GO:0046394//carboxylic acid biosynthetic process;GO:0010033//response to organic substance;GO:0006807//nitrogen compound metabolic process;GO:0009617//response to bacterium;GO:0006082//organic acid metabolic process;GO:1901575//organic substance catabolic process;GO:0050794//regulation of cellular process;GO:0044248//cellular catabolic process;GO:0009057//macromolecule catabolic process;GO:190156…
Unigene0001185	-	PREDICTED: uncharacterized protein LOC104605314 [Nelumbo nucifera]	-	-	-	-
Unigene0001247	At3g50690	Acidic leucine-rich nuclear phosphoprotein 32-related protein [Anthurium amnicola]	-	-	-	-
Unigene0001284	qtrtd1	PREDICTED: queuine tRNA-ribosyltransferase subunit QTRTD1-like isoform X2 [Phoenix dactylifera]	-	-	-	-
Unigene0001561	-	PREDICTED: protein PIN-LIKES 3-like [Malus domestica]	-	-	-	-
Unigene0001635	-	PREDICTED: uncharacterized protein LOC104607806 isoform X1 [Nelumbo nucifera]	-	-	-	-
Unigene0001899	-	--	-	-	-	-
Unigene0001903	SYT1	PREDICTED: synaptotagmin-2-like [Nelumbo nucifera]	-	-	-	-
Unigene0001904	BLH2	PREDICTED: BEL1-like homeodomain protein 4 [Nelumbo nucifera]	-	-	-	-
Unigene0001963	rpa49	PREDICTED: DNA-directed RNA polymerase I subunit rpa49 [Nelumbo nucifera]	ko01100//Metabolic pathways//Global and Overview//Metabolism;ko00230//Purine metabolism//Nucleotide metabolism//Metabolism;ko00240//Pyrimidine metabolism//Nucleotide metabolism//Metabolism;ko03020//RNA polymerase//Transcription//Genetic Information Processing	-	-	-
Unigene0001990	FKBP17-1	PREDICTED: peptidyl-prolyl cis-trans isomerase FKBP17-1, chloroplastic [Vitis vinifera]	-	-	-	-
Unigene0002036	CLS	PREDICTED: cardiolipin synthase (CMP-forming), mitochondrial [Nelumbo nucifera]	ko01100//Metabolic pathways//Global and Overview//Metabolism;ko00564//Glycerophospholipid metabolism//Lipid metabolism//Metabolism	GO:0005623//cell;GO:0044464//cell part;GO:0043226//organelle;GO:0044424//intracellular part;GO:0005622//intracellular;GO:0043229//intracellular organelle;GO:0043231//intracellular membrane-bounded organelle;GO:0043227//membrane-bounded organelle	GO:0046872//metal ion binding;GO:0003824//catalytic activity;GO:0030572//phosphatidyltransferase activity;GO:0043169//cation binding;GO:0005488//binding;GO:0016780//phosphotransferase activity, for other substituted phosphate groups;GO:0016740//transferase activity;GO:0046914//transition metal ion binding;GO:0043167//ion binding;GO:0016772//transferase activity, transferring phosphorus-containing…	GO:0019932//second-messenger-mediated signaling;GO:0023052//signaling;GO:0065007//biological regulation;GO:0044700//single organism signaling;GO:0044699//single-organism process;GO:0044763//single-organism cellular process;GO:0050896//response to stimulus;GO:0050794//regulation of cellular process;GO:0051716//cellular response to stimulus;GO:0007154//cell communication;GO:0009987//cellular proces…
Unigene0002188	-	hypothetical protein ARALYDRAFT_920038 [Arabidopsis lyrata subsp. lyrata] [Arabidopsis lyrata]	-	-	-	-
Unigene0002197	PAPS4	PREDICTED: LOW QUALITY PROTEIN: nuclear poly(A) polymerase 4-like [Nelumbo nucifera]	ko03015//mRNA surveillance pathway//Translation//Genetic Information Processing	-	-	-
Unigene0002220	BG	PREDICTED: basic 7S globulin [Vitis vinifera]	-	-	-	GO:0044238//primary metabolic process;GO:0008152//metabolic process;GO:0071704//organic substance metabolic process;GO:0043170//macromolecule metabolic process;GO:0019538//protein metabolic process
Unigene0002437	-	--	-	-	-	-
Unigene0002460	PEX7	PREDICTED: peroxisome biogenesis protein 7-like [Nelumbo nucifera]	ko04146//Peroxisome//Transport and catabolism//Cellular Processes	-	-	-
Unigene0002477	FPP4	PREDICTED: filament-like plant protein 4 [Nelumbo nucifera]	-	-	-	-
Unigene0002575	-	--	-	-	-	-
Unigene0002596	At5g23430	PREDICTED: katanin p80 WD40 repeat-containing subunit B1 homolog [Nelumbo nucifera]	-	-	-	-
Unigene0002619	LPEAT2	PREDICTED: lysophospholipid acyltransferase LPEAT2-like [Nelumbo nucifera]	ko01100//Metabolic pathways//Global and Overview//Metabolism;ko00564//Glycerophospholipid metabolism//Lipid metabolism//Metabolism;ko00565//Ether lipid metabolism//Lipid metabolism//Metabolism	GO:0016020//membrane	GO:0016746//transferase activity, transferring acyl groups;GO:0016740//transferase activity;GO:0003824//catalytic activity	GO:0006644//phospholipid metabolic process;GO:0044699//single-organism process;GO:0044710//single-organism metabolic process;GO:0008152//metabolic process;GO:0044255//cellular lipid metabolic process;GO:0019637//organophosphate metabolic process;GO:0044238//primary metabolic process;GO:0044237//cellular metabolic process;GO:0009987//cellular process;GO:0006793//phosphorus metabolic process;GO:004…
Unigene0002645	SPBC23E6.02	PREDICTED: helicase-like transcription factor CHR28 [Juglans regia]	-	-	-	-
Unigene0002739	FPP6	PREDICTED: filament-like plant protein 4 [Nelumbo nucifera]	-	-	-	-
Unigene0002842	GDH	Glutamate dehydrogenase 2, partial [Anthurium amnicola]	ko01100//Metabolic pathways//Global and Overview//Metabolism;ko01200//Carbon metabolism//Global and Overview//Metabolism;ko00250//Alanine, aspartate and glutamate metabolism//Amino acid metabolism//Metabolism;ko00910//Nitrogen metabolism//Energy metabolism//Metabolism;ko00220//Arginine biosynthesis//Amino acid metabolism//Metabolism	GO:0016020//membrane;GO:0043231//intracellular membrane-bounded organelle;GO:0031090//organelle membrane;GO:0043227//membrane-bounded organelle;GO:0005622//intracellular;GO:0005623//cell;GO:0044424//intracellular part;GO:0044464//cell part;GO:0044422//organelle part;GO:0043226//organelle;GO:0043229//intracellular organelle	GO:0043169//cation binding;GO:0043167//ion binding;GO:1901363//heterocyclic compound binding;GO:0016646//oxidoreductase activity, acting on the CH-NH group of donors, NAD or NADP as acceptor;GO:0001882//nucleoside binding;GO:0097367//carbohydrate derivative binding;GO:0032550//purine ribonucleoside binding;GO:0036094//small molecule binding;GO:0032549//ribonucleoside binding;GO:0016639//oxidoredu…	GO:0051179//localization;GO:0006520//cellular amino acid metabolic process;GO:0006575//cellular modified amino acid metabolic process;GO:0051234//establishment of localization;GO:0044710//single-organism metabolic process;GO:0005996//monosaccharide metabolic process;GO:0044699//single-organism process;GO:0005975//carbohydrate metabolic process;GO:0071840//cellular component organization or biogen…
Unigene0002853	-	PREDICTED: DEAD-box ATP-dependent RNA helicase 42-like [Nelumbo nucifera]	-	-	-	-
Unigene0002878	-	--	-	-	-	-
Unigene0002921	-	PREDICTED: uncharacterized protein LOC104593065 [Nelumbo nucifera]	-	-	-	-
Unigene0002933	-	--	-	-	-	-
Unigene0003097	FLK	PREDICTED: LOW QUALITY PROTEIN: flowering locus K homology domain [Nelumbo nucifera]	-	-	-	-
Unigene0003155	DBP	PREDICTED: remorin [Oryza sativa Japonica Group]	-	-	-	-
Unigene0003394	-	--	-	-	-	-
Unigene0003579	-	--	-	-	-	-
Unigene0003597	-	--	-	-	-	-
Unigene0003607	-	integrase core domain containing protein [Phaseolus vulgaris]	-	-	-	-
Unigene0003683	At3g47200	PREDICTED: UPF0481 protein At3g47200-like [Nelumbo nucifera]	-	-	-	-
Unigene0003811	Os03g0815200	PREDICTED: probable methylenetetrahydrofolate reductase [Musa acuminata subsp. malaccensis] [Musa acuminata]	ko01100//Metabolic pathways//Global and Overview//Metabolism;ko01120//Microbial metabolism in diverse environments//Global and Overview//Metabolism;ko01200//Carbon metabolism//Global and Overview//Metabolism;ko00670//One carbon pool by folate//Metabolism of cofactors and vitamins//Metabolism	-	-	-
Unigene0003917	-	--	-	-	-	-
Unigene0004000	WVD2	PREDICTED: protein WVD2-like 5 [Nelumbo nucifera]	-	-	-	-
Unigene0004015	PHS1	PREDICTED: dual specificity protein phosphatase PHS1 isoform X2 [Citrus sinensis]	-	GO:0044424//intracellular part;GO:0044464//cell part;GO:0005623//cell;GO:0005622//intracellular	GO:0016787//hydrolase activity;GO:0016788//hydrolase activity, acting on ester bonds;GO:0016772//transferase activity, transferring phosphorus-containing groups;GO:0016791//phosphatase activity;GO:0003824//catalytic activity;GO:0042578//phosphoric ester hydrolase activity;GO:0016740//transferase activity;GO:0004721//phosphoprotein phosphatase activity	GO:0071704//organic substance metabolic process;GO:0044260//cellular macromolecule metabolic process;GO:0023052//signaling;GO:0032268//regulation of cellular protein metabolic process;GO:0071310//cellular response to organic substance;GO:0030865//cortical cytoskeleton organization;GO:0071900//regulation of protein serine/threonine kinase activity;GO:0031399//regulation of protein modification pro…
Unigene0004325	-	S-adenosyl-L-methionine-dependent methyltransferases superfamily protein isoform 2 [Theobroma cacao]	-	-	GO:0003824//catalytic activity;GO:0016740//transferase activity	-
Unigene0004339	Os03g0144800	PREDICTED: probable xyloglucan galactosyltransferase GT19 [Nelumbo nucifera]	-	-	-	-
Unigene0004343	CYP89A2	PREDICTED: cytochrome P450 89A2 [Elaeis guineensis]	-	-	GO:0005488//binding;GO:0043167//ion binding;GO:0003824//catalytic activity;GO:0043169//cation binding;GO:0046872//metal ion binding;GO:0016491//oxidoreductase activity	-
Unigene0004428	At5g64460	PREDICTED: phosphoglycerate mutase-like protein 1 isoform X3 [Phoenix dactylifera]	-	-	-	-
Unigene0004444	-	--	-	-	-	-
Unigene0004473	Fam32a	PREDICTED: protein FAM32A isoform X1 [Nelumbo nucifera]	-	-	-	-
Unigene0004557	RPL26A	PREDICTED: 60S ribosomal protein L26-2-like [Elaeis guineensis]	ko03010//Ribosome//Translation//Genetic Information Processing	-	-	-
Unigene0004592	GIP	Retrovirus-related Pol polyprotein from transposon TNT 1-94 [Cajanus cajan]	-	-	-	-
Unigene0004620	-	PREDICTED: proline-rich transmembrane protein 1-like [Musa acuminata subsp. malaccensis] [Musa acuminata]	-	-	-	-
Unigene0004750	GIP	Retrovirus-related Pol polyprotein from transposon TNT 1-94, partial [Cajanus cajan]	-	-	-	-
Unigene0004828	At3g61360	PREDICTED: pentatricopeptide repeat-containing protein At3g61360 [Nelumbo nucifera]	-	-	-	-
Unigene0004943	-	dehydrin 10 [Eucalyptus globulus]	-	-	-	-
Unigene0004962	-	octicosapeptide/Phox/Bem1p domain-containing family protein [Populus trichocarpa]	-	-	-	-
Unigene0005034	rhp16	PREDICTED: DNA repair protein RAD16 [Vitis vinifera]	-	-	GO:0001882//nucleoside binding;GO:0016818//hydrolase activity, acting on acid anhydrides, in phosphorus-containing anhydrides;GO:0043167//ion binding;GO:0001883//purine nucleoside binding;GO:0097159//organic cyclic compound binding;GO:0032550//purine ribonucleoside binding;GO:0043169//cation binding;GO:0097367//carbohydrate derivative binding;GO:0005488//binding;GO:0016462//pyrophosphatase activi…	-
Unigene0005272	At1g26850	PREDICTED: probable methyltransferase PMT2 [Nelumbo nucifera]	-	-	-	-
Unigene0005330	At3g25440	PREDICTED: uncharacterized CRM domain-containing protein At3g25440, chloroplastic [Nelumbo nucifera]	-	-	-	-
Unigene0005537	PER17	PREDICTED: peroxidase 17-like [Nelumbo nucifera]	ko01100//Metabolic pathways//Global and Overview//Metabolism;ko01110//Biosynthesis of secondary metabolites//Global and Overview//Metabolism;ko00940//Phenylpropanoid biosynthesis//Biosynthesis of other secondary metabolites//Metabolism	GO:0005622//intracellular;GO:0005623//cell;GO:0043231//intracellular membrane-bounded organelle;GO:0043229//intracellular organelle;GO:0044464//cell part;GO:0044444//cytoplasmic part;GO:0043226//organelle;GO:0044424//intracellular part;GO:0043227//membrane-bounded organelle;GO:0005737//cytoplasm	GO:0043169//cation binding;GO:0046906//tetrapyrrole binding;GO:0003824//catalytic activity;GO:0043167//ion binding;GO:0097159//organic cyclic compound binding;GO:1901363//heterocyclic compound binding;GO:0005488//binding	GO:0009653//anatomical structure morphogenesis;GO:0009799//specification of symmetry;GO:0009955//adaxial/abaxial pattern specification;GO:0048856//anatomical structure development;GO:0048509//regulation of meristem development;GO:0048507//meristem development;GO:0044237//cellular metabolic process;GO:0042743//hydrogen peroxide metabolic process;GO:0048532//anatomical structure arrangement;GO:0044…
Unigene0005557	-	Centrosomal protein [Anthurium amnicola]	-	-	-	-
Unigene0005621	-	--	-	-	-	-
Unigene0005646	tlp	Osmotin 34 [Theobroma cacao]	-	-	-	-
Unigene0005674	SPBC1271.03c	PREDICTED: MATH and LRR domain-containing protein PFE0570w-like [Ziziphus jujuba]	-	-	-	-
Unigene0005820	-	Armadillo-like helical [Corchorus olitorius]	-	-	-	-
Unigene0005891	-	--	-	-	-	-
Unigene0005940	PIP5K1	Histone H3 K4-specific methyltransferase SET7/9 family protein [Theobroma cacao]	-	-	-	-
Unigene0005975	HAT2	PREDICTED: homeobox-leucine zipper protein HAT4 [Nelumbo nucifera]	-	-	-	GO:0044260//cellular macromolecule metabolic process;GO:1901576//organic substance biosynthetic process;GO:0009058//biosynthetic process;GO:0043170//macromolecule metabolic process;GO:0009059//macromolecule biosynthetic process;GO:0071704//organic substance metabolic process;GO:0044249//cellular biosynthetic process;GO:0044237//cellular metabolic process;GO:0010467//gene expression;GO:0009987//ce…
Unigene0005998	PIP5K1	PREDICTED: phosphatidylinositol 4-phosphate 5-kinase 1-like [Nelumbo nucifera]	ko01100//Metabolic pathways//Global and Overview//Metabolism;ko04144//Endocytosis//Transport and catabolism//Cellular Processes;ko00562//Inositol phosphate metabolism//Carbohydrate metabolism//Metabolism;ko04070//Phosphatidylinositol signaling system//Signal transduction//Environmental Information Processing	-	GO:0016740//transferase activity;GO:0016772//transferase activity, transferring phosphorus-containing groups;GO:0003824//catalytic activity;GO:0016301//kinase activity	GO:0046486//glycerolipid metabolic process;GO:0006629//lipid metabolic process;GO:0071704//organic substance metabolic process;GO:0044255//cellular lipid metabolic process;GO:0019637//organophosphate metabolic process;GO:0006793//phosphorus metabolic process;GO:0044238//primary metabolic process;GO:0006650//glycerophospholipid metabolic process;GO:0044763//single-organism cellular process;GO:0006…
Unigene0006037	KIN12B	PREDICTED: kinesin-like protein KIN12B [Cucumis sativus]	-	GO:0043234//protein complex;GO:0043226//organelle;GO:0043228//non-membrane-bounded organelle;GO:0032991//macromolecular complex;GO:0044430//cytoskeletal part;GO:0043229//intracellular organelle;GO:0005623//cell;GO:0044424//intracellular part;GO:0005622//intracellular;GO:0044464//cell part;GO:0005856//cytoskeleton;GO:0005875//microtubule associated complex;GO:0043232//intracellular non-membrane-bo…	GO:0003774//motor activity;GO:0016817//hydrolase activity, acting on acid anhydrides;GO:0016818//hydrolase activity, acting on acid anhydrides, in phosphorus-containing anhydrides;GO:0001883//purine nucleoside binding;GO:0008092//cytoskeletal protein binding;GO:0017111//nucleoside-triphosphatase activity;GO:0036094//small molecule binding;GO:0005515//protein binding;GO:0005488//binding;GO:0015631…	GO:2001141//regulation of RNA biosynthetic process;GO:0018193//peptidyl-amino acid modification;GO:1903506//regulation of nucleic acid-templated transcription;GO:0006342//chromatin silencing;GO:0010468//regulation of gene expression;GO:0060255//regulation of macromolecule metabolic process;GO:0051171//regulation of nitrogen compound metabolic process;GO:0045814//negative regulation of gene expres…
Unigene0006038	GA20OX1	PREDICTED: protein DMR6-LIKE OXYGENASE 1 [Nelumbo nucifera]	-	-	GO:0003824//catalytic activity;GO:0043169//cation binding;GO:0016705//oxidoreductase activity, acting on paired donors, with incorporation or reduction of molecular oxygen;GO:0005488//binding;GO:0043167//ion binding;GO:0016491//oxidoreductase activity	GO:0044699//single-organism process;GO:0044710//single-organism metabolic process;GO:0008152//metabolic process
Unigene0006057	Alg13	PREDICTED: UDP-N-acetylglucosamine transferase subunit ALG13 homolog isoform X1 [Elaeis guineensis]	ko01100//Metabolic pathways//Global and Overview//Metabolism;ko00510//N-Glycan biosynthesis//Glycan biosynthesis and metabolism//Metabolism	-	GO:0005488//binding;GO:0016757//transferase activity, transferring glycosyl groups;GO:0003824//catalytic activity;GO:0016740//transferase activity	GO:0006629//lipid metabolic process;GO:0044255//cellular lipid metabolic process;GO:0044763//single-organism cellular process;GO:0030258//lipid modification;GO:0071704//organic substance metabolic process;GO:0008152//metabolic process;GO:0044699//single-organism process;GO:0044237//cellular metabolic process;GO:0044238//primary metabolic process;GO:0044710//single-organism metabolic process;GO:00…
Unigene0006093	-	reverse transcriptase [Corchorus capsularis]	-	-	-	-
Unigene0006122	PREP1	PREDICTED: presequence protease 2, chloroplastic/mitochondrial [Nelumbo nucifera]	-	-	-	-
Unigene0006172	PHRF1	PHD finger family protein [Populus trichocarpa]	-	-	-	-
Unigene0006385	-	BnaA05g03840D [Brassica napus]	-	-	-	-
Unigene0006475	phoD	PREDICTED: uncharacterized protein LOC104603847 isoform X1 [Nelumbo nucifera]	ko01100//Metabolic pathways//Global and Overview//Metabolism;ko00790//Folate biosynthesis//Metabolism of cofactors and vitamins//Metabolism	-	-	-
Unigene0006518	GDCSP	PREDICTED: glycine dehydrogenase (decarboxylating), mitochondrial [Nelumbo nucifera]	ko01100//Metabolic pathways//Global and Overview//Metabolism;ko01110//Biosynthesis of secondary metabolites//Global and Overview//Metabolism;ko01130//Biosynthesis of antibiotics//Global and Overview//Metabolism;ko01200//Carbon metabolism//Global and Overview//Metabolism;ko00630//Glyoxylate and dicarboxylate metabolism//Carbohydrate metabolism//Metabolism;ko00260//Glycine, serine and threonine met…	-	-	-
Unigene0006669	-	PREDICTED: protein FYV8 [Vitis vinifera]	-	-	-	-
Unigene0006683	RAPTOR1	PREDICTED: regulatory-associated protein of TOR 1-like isoform X3 [Nelumbo nucifera]	-	-	-	-
Unigene0006685	At3g49055	PREDICTED: myosin-4-like [Nelumbo nucifera]	-	-	-	GO:1902578//single-organism localization;GO:0071704//organic substance metabolic process;GO:0006464//cellular protein modification process;GO:0009606//tropism;GO:0050896//response to stimulus;GO:0030001//metal ion transport;GO:0043412//macromolecule modification;GO:0044260//cellular macromolecule metabolic process;GO:0036211//protein modification process;GO:0044238//primary metabolic process;GO:0…
Unigene0006809	UTP14	PREDICTED: U3 small nucleolar RNA-associated protein 14 homolog A [Vitis vinifera]	ko03008//Ribosome biogenesis in eukaryotes//Translation//Genetic Information Processing	-	-	-
Unigene0006857	MORF9	PREDICTED: DAG protein, chloroplastic [Nicotiana sylvestris]	-	GO:0044422//organelle part;GO:0043231//intracellular membrane-bounded organelle;GO:0005737//cytoplasm;GO:0005622//intracellular;GO:0043227//membrane-bounded organelle;GO:0009536//plastid;GO:0044464//cell part;GO:0044424//intracellular part;GO:0043226//organelle;GO:0043229//intracellular organelle;GO:0005623//cell;GO:0044444//cytoplasmic part;GO:0044435//plastid part;GO:0044446//intracellular orga…	-	GO:0044260//cellular macromolecule metabolic process;GO:0009657//plastid organization;GO:0006807//nitrogen compound metabolic process;GO:0019438//aromatic compound biosynthetic process;GO:0009058//biosynthetic process;GO:1901362//organic cyclic compound biosynthetic process;GO:1901576//organic substance biosynthetic process;GO:0008152//metabolic process;GO:0044249//cellular biosynthetic process;G…
Unigene0006862	-	--	-	-	-	-
Unigene0006865	GIP	integrase core domain containing protein [Phaseolus vulgaris]	-	-	-	-
Unigene0006889	-	--	-	-	-	-
Unigene0006950	-	LOW QUALITY PROTEIN: DUF4378 domain-containing protein, partial [Cephalotus follicularis]	-	-	-	-
Unigene0006970	CALS10	PREDICTED: callose synthase 10 [Nelumbo nucifera]	-	-	-	-
Unigene0007045	PUP11	PREDICTED: probable purine permease 11 [Musa acuminata subsp. malaccensis] [Musa acuminata]	-	GO:0016020//membrane	-	-
Unigene0007108	-	PREDICTED: uncharacterized protein LOC104612348 [Nelumbo nucifera]	-	-	-	-
Unigene0007192	FER	PREDICTED: receptor-like protein kinase FERONIA [Nelumbo nucifera]	-	GO:0005623//cell;GO:0071944//cell periphery;GO:0044464//cell part;GO:0016020//membrane	GO:0004672//protein kinase activity;GO:0003824//catalytic activity;GO:0016301//kinase activity;GO:0016740//transferase activity;GO:0016773//phosphotransferase activity, alcohol group as acceptor;GO:0016772//transferase activity, transferring phosphorus-containing groups	GO:0010035//response to inorganic substance;GO:0006464//cellular protein modification process;GO:0048869//cellular developmental process;GO:0051179//localization;GO:0044237//cellular metabolic process;GO:0044260//cellular macromolecule metabolic process;GO:0043170//macromolecule metabolic process;GO:0006796//phosphate-containing compound metabolic process;GO:0044765//single-organism transport;GO:…
Unigene0007239	-	Uncharacterized protein TCM_016791 [Theobroma cacao]	-	-	-	-
Unigene0007414	SIS3	zf-RING_2 domain-containing protein [Cephalotus follicularis]	-	GO:0016020//membrane;GO:0031224//intrinsic component of membrane;GO:0044425//membrane part	GO:0043167//ion binding;GO:0046872//metal ion binding;GO:0016740//transferase activity;GO:0019787//ubiquitin-like protein transferase activity;GO:0005488//binding;GO:0046914//transition metal ion binding;GO:0043169//cation binding;GO:0003824//catalytic activity	GO:0071704//organic substance metabolic process;GO:0009987//cellular process;GO:0010410//hemicellulose metabolic process;GO:0006950//response to stress;GO:1901700//response to oxygen-containing compound;GO:0009642//response to light intensity;GO:0009743//response to carbohydrate;GO:0044036//cell wall macromolecule metabolic process;GO:0044700//single organism signaling;GO:0044237//cellular metabo…
Unigene0007481	IP5P2	PREDICTED: type I inositol polyphosphate 5-phosphatase 2 [Theobroma cacao]	-	-	GO:0042578//phosphoric ester hydrolase activity;GO:0016788//hydrolase activity, acting on ester bonds;GO:0052745//inositol phosphate phosphatase activity;GO:0003824//catalytic activity;GO:0016791//phosphatase activity;GO:0016787//hydrolase activity	GO:0001101//response to acid chemical;GO:1901615//organic hydroxy compound metabolic process;GO:0051716//cellular response to stimulus;GO:0006793//phosphorus metabolic process;GO:0007154//cell communication;GO:0044281//small molecule metabolic process;GO:0071704//organic substance metabolic process;GO:0019637//organophosphate metabolic process;GO:0009719//response to endogenous stimulus;GO:005079…
Unigene0007647	PCKA	PREDICTED: phosphoenolpyruvate carboxykinase [ATP]-like [Juglans regia]	ko01100//Metabolic pathways//Global and Overview//Metabolism;ko01110//Biosynthesis of secondary metabolites//Global and Overview//Metabolism;ko01130//Biosynthesis of antibiotics//Global and Overview//Metabolism;ko01120//Microbial metabolism in diverse environments//Global and Overview//Metabolism;ko01200//Carbon metabolism//Global and Overview//Metabolism;ko00010//Glycolysis / Gluconeogenesis//Ca…	-	-	-
Unigene0007697	EX1	PREDICTED: protein EXECUTER 1, chloroplastic [Nelumbo nucifera]	-	GO:0044444//cytoplasmic part;GO:0005737//cytoplasm;GO:0043229//intracellular organelle;GO:0043231//intracellular membrane-bounded organelle;GO:0005623//cell;GO:0009536//plastid;GO:0043227//membrane-bounded organelle;GO:0044424//intracellular part;GO:0044464//cell part;GO:0005622//intracellular;GO:0043226//organelle	-	GO:0050896//response to stimulus;GO:0000304//response to singlet oxygen;GO:0006950//response to stress;GO:0006979//response to oxidative stress;GO:0042221//response to chemical;GO:1901700//response to oxygen-containing compound;GO:0010035//response to inorganic substance;GO:0000302//response to reactive oxygen species
Unigene0007710	-	PREDICTED: uncharacterized protein LOC103709624 [Phoenix dactylifera]	-	-	-	-
Unigene0007712	Ttc1	receptor kinase [Populus tomentosa]	-	-	-	-
Unigene0007730	DR1	PREDICTED: protein Dr1 homolog [Amborella trichopoda]	-	GO:0043229//intracellular organelle;GO:0043227//membrane-bounded organelle;GO:0043226//organelle;GO:0044464//cell part;GO:0005623//cell;GO:0005622//intracellular;GO:0043231//intracellular membrane-bounded organelle;GO:0044424//intracellular part	GO:0046983//protein dimerization activity;GO:0003676//nucleic acid binding;GO:0005515//protein binding;GO:0003677//DNA binding;GO:1901363//heterocyclic compound binding;GO:0005488//binding;GO:0097159//organic cyclic compound binding	-
Unigene0007850	TAF15B	PREDICTED: transcription initiation factor TFIID subunit 15b-like isoform X1 [Glycine max]	-	-	-	-
Unigene0007860	LACE1	PREDICTED: lactation elevated protein 1-like isoform X1 [Nelumbo nucifera]	-	-	-	-
Unigene0008035	Gpr107	PREDICTED: protein GPR107-like [Nelumbo nucifera]	-	GO:0044424//intracellular part;GO:0005622//intracellular;GO:0043231//intracellular membrane-bounded organelle;GO:0031984//organelle subcompartment;GO:0031224//intrinsic component of membrane;GO:0044422//organelle part;GO:0044446//intracellular organelle part;GO:0044425//membrane part;GO:0005623//cell;GO:0043226//organelle;GO:0043227//membrane-bounded organelle;GO:0016020//membrane;GO:0043229//int…	-	-
Unigene0008185	-	PREDICTED: titin homolog isoform X1 [Elaeis guineensis]	-	-	-	-
Unigene0008318	CLPP3	PREDICTED: ATP-dependent Clp protease proteolytic subunit 3, chloroplastic-like [Phoenix dactylifera]	-	GO:0043231//intracellular membrane-bounded organelle;GO:0031975//envelope;GO:0043227//membrane-bounded organelle;GO:0031976//plastid thylakoid;GO:0009368//endopeptidase Clp complex;GO:0043226//organelle;GO:0009526//plastid envelope;GO:0032991//macromolecular complex;GO:0005622//intracellular;GO:0043229//intracellular organelle;GO:0009536//plastid;GO:0043234//protein complex;GO:0044422//organelle …	GO:0032550//purine ribonucleoside binding;GO:0001883//purine nucleoside binding;GO:0097159//organic cyclic compound binding;GO:0032549//ribonucleoside binding;GO:0016787//hydrolase activity;GO:0004175//endopeptidase activity;GO:0003824//catalytic activity;GO:0097367//carbohydrate derivative binding;GO:1901363//heterocyclic compound binding;GO:0005488//binding;GO:0070011//peptidase activity, actin…	GO:0071704//organic substance metabolic process;GO:0019538//protein metabolic process;GO:0044238//primary metabolic process;GO:0043170//macromolecule metabolic process;GO:0008152//metabolic process
Unigene0008332	-	PREDICTED: uncharacterized protein LOC103339895 [Prunus mume]	-	-	-	-
Unigene0008439	At4g13590	GDT1-like protein 2, chloroplastic [Anthurium amnicola]	-	-	-	-
Unigene0008504	-	Phosphoribosylformylglycinamidine synthase 2 [Anthurium amnicola]	-	-	-	-
Unigene0008517	TIM44-2	PREDICTED: mitochondrial import inner membrane translocase subunit TIM44-2 [Nelumbo nucifera]	-	-	-	-
Unigene0008518	EGY3	PREDICTED: probable zinc metallopeptidase EGY3, chloroplastic isoform X1 [Juglans regia]	-	-	GO:0003824//catalytic activity;GO:0016787//hydrolase activity	-
Unigene0008578	-	PREDICTED: keratin, type II cytoskeletal 5 isoform X1 [Sesamum indicum]	-	-	-	-
Unigene0008618	CNX1	PREDICTED: calnexin homolog [Nelumbo nucifera]	ko04141//Protein processing in endoplasmic reticulum//Folding, sorting and degradation//Genetic Information Processing;ko04145//Phagosome//Transport and catabolism//Cellular Processes	GO:0043226//organelle;GO:0044464//cell part;GO:0043231//intracellular membrane-bounded organelle;GO:0005623//cell;GO:0043227//membrane-bounded organelle;GO:0043229//intracellular organelle;GO:0044424//intracellular part;GO:0005622//intracellular	GO:0005488//binding;GO:0005515//protein binding	GO:0009987//cellular process;GO:0044237//cellular metabolic process;GO:0044260//cellular macromolecule metabolic process;GO:0044238//primary metabolic process;GO:0019538//protein metabolic process;GO:0008152//metabolic process;GO:0071704//organic substance metabolic process;GO:0043170//macromolecule metabolic process;GO:0044267//cellular protein metabolic process
Unigene0008734	At1g60770	PREDICTED: pentatricopeptide repeat-containing protein At1g60770 [Nelumbo nucifera]	-	-	-	-
Unigene0008806	-	PREDICTED: remorin-like [Citrus sinensis]	-	-	-	-
Unigene0008908	At4g13360	PREDICTED: 3-hydroxyisobutyryl-CoA hydrolase-like protein 3, mitochondrial [Amborella trichopoda]	ko01100//Metabolic pathways//Global and Overview//Metabolism;ko01200//Carbon metabolism//Global and Overview//Metabolism;ko00410//beta-Alanine metabolism//Metabolism of other amino acids//Metabolism;ko00280//Valine, leucine and isoleucine degradation//Amino acid metabolism//Metabolism;ko00640//Propanoate metabolism//Carbohydrate metabolism//Metabolism	-	-	-
Unigene0009052	NUB1	PREDICTED: NEDD8 ultimate buster 1 [Nelumbo nucifera]	-	-	-	-
Unigene0009074	Elac2	PREDICTED: zinc phosphodiesterase ELAC protein 2-like isoform X1 [Nelumbo nucifera]	ko03013//RNA transport//Translation//Genetic Information Processing	-	-	GO:0006725//cellular aromatic compound metabolic process;GO:0090501//RNA phosphodiester bond hydrolysis;GO:0009987//cellular process;GO:0044238//primary metabolic process;GO:0046483//heterocycle metabolic process;GO:0090305//nucleic acid phosphodiester bond hydrolysis;GO:0034641//cellular nitrogen compound metabolic process;GO:0071704//organic substance metabolic process;GO:0090304//nucleic acid …
Unigene0009079	CRT3	PREDICTED: calreticulin-3-like [Musa acuminata subsp. malaccensis] [Musa acuminata]	ko04141//Protein processing in endoplasmic reticulum//Folding, sorting and degradation//Genetic Information Processing;ko04145//Phagosome//Transport and catabolism//Cellular Processes	GO:0005623//cell;GO:0005622//intracellular;GO:0044424//intracellular part;GO:0043231//intracellular membrane-bounded organelle;GO:0044464//cell part;GO:0043227//membrane-bounded organelle;GO:0043226//organelle;GO:0043229//intracellular organelle	GO:0005515//protein binding;GO:0005488//binding	GO:0044238//primary metabolic process;GO:0009987//cellular process;GO:0044237//cellular metabolic process;GO:0044267//cellular protein metabolic process;GO:0071704//organic substance metabolic process;GO:0008152//metabolic process;GO:0019538//protein metabolic process;GO:0043170//macromolecule metabolic process;GO:0044260//cellular macromolecule metabolic process
Unigene0009151	TIC	PREDICTED: protein TIME FOR COFFEE-like isoform X2 [Nelumbo nucifera]	-	-	-	-
Unigene0009293	At4g26390	PREDICTED: pyruvate kinase 1, cytosolic-like [Phoenix dactylifera]	ko01100//Metabolic pathways//Global and Overview//Metabolism;ko01110//Biosynthesis of secondary metabolites//Global and Overview//Metabolism;ko01130//Biosynthesis of antibiotics//Global and Overview//Metabolism;ko01120//Microbial metabolism in diverse environments//Global and Overview//Metabolism;ko01200//Carbon metabolism//Global and Overview//Metabolism;ko01230//Biosynthesis of amino acids//Glo…	-	GO:0043169//cation binding;GO:0016301//kinase activity;GO:0043167//ion binding;GO:0031420//alkali metal ion binding;GO:0046872//metal ion binding;GO:0005488//binding;GO:0016740//transferase activity;GO:0016772//transferase activity, transferring phosphorus-containing groups;GO:0003824//catalytic activity	GO:0044699//single-organism process;GO:0044710//single-organism metabolic process;GO:0009987//cellular process;GO:0043436//oxoacid metabolic process;GO:0008152//metabolic process;GO:0071704//organic substance metabolic process;GO:0019752//carboxylic acid metabolic process;GO:0006082//organic acid metabolic process;GO:0044281//small molecule metabolic process;GO:0006793//phosphorus metabolic proce…
Unigene0009412	FCA	PREDICTED: flowering time control protein FCA isoform X2 [Nelumbo nucifera]	-	-	-	-
Unigene0009419	PCMP-H40	PREDICTED: pentatricopeptide repeat-containing protein At3g12770-like [Elaeis guineensis]	-	-	-	-
Unigene0009495	DI19-6	PREDICTED: protein DEHYDRATION-INDUCED 19 homolog 5-like [Nelumbo nucifera]	-	-	-	-
Unigene0009530	-	UHRF1-binding protein 1-like [Anthurium amnicola]	-	-	-	-
Unigene0009561	At2g43200	PREDICTED: probable methyltransferase PMT19 isoform X1 [Nelumbo nucifera]	-	GO:0043227//membrane-bounded organelle;GO:0031090//organelle membrane;GO:0043226//organelle;GO:0031224//intrinsic component of membrane;GO:0044425//membrane part;GO:0044422//organelle part;GO:0016020//membrane	GO:0016740//transferase activity;GO:0003824//catalytic activity;GO:0016741//transferase activity, transferring one-carbon groups	GO:0008152//metabolic process
Unigene0009737	COL5	PREDICTED: zinc finger protein CONSTANS-LIKE 5-like [Nelumbo nucifera]	-	-	-	-
Unigene0009882	-	--	-	-	-	-
Unigene0009981	-	--	-	-	-	-
Unigene0010046	-	PREDICTED: sphingomyelin phosphodiesterase 4 [Vitis vinifera]	-	-	-	-
Unigene0010079	At3g59480	PREDICTED: fructokinase-1-like [Populus euphratica]	-	GO:0044464//cell part;GO:0044424//intracellular part;GO:0005622//intracellular;GO:0005623//cell	GO:0016772//transferase activity, transferring phosphorus-containing groups;GO:0016740//transferase activity;GO:0003824//catalytic activity	GO:0009987//cellular process;GO:0044237//cellular metabolic process;GO:0008152//metabolic process;GO:0006796//phosphate-containing compound metabolic process;GO:0006793//phosphorus metabolic process
Unigene0010121	-	Tetratricopeptide-like helical [Cynara cardunculus var. scolymus] [Cynara cardunculus]	-	-	-	-
Unigene0010172	SOD	PREDICTED: superoxide dismutase [Mn], mitochondrial [Gossypium hirsutum]	ko04146//Peroxisome//Transport and catabolism//Cellular Processes	-	GO:0043167//ion binding;GO:0003824//catalytic activity;GO:0005488//binding;GO:0043169//cation binding	GO:0044237//cellular metabolic process;GO:0009987//cellular process;GO:0072593//reactive oxygen species metabolic process;GO:0044710//single-organism metabolic process;GO:0008152//metabolic process;GO:0044699//single-organism process;GO:0006801//superoxide metabolic process
Unigene0010188	CDF2	PREDICTED: cyclic dof factor 3-like [Nelumbo nucifera]	-	-	-	-
Unigene0010190	FER	PREDICTED: receptor-like protein kinase FERONIA [Nelumbo nucifera]	-	-	GO:0016772//transferase activity, transferring phosphorus-containing groups;GO:0016301//kinase activity;GO:0016740//transferase activity;GO:0003824//catalytic activity	GO:0006793//phosphorus metabolic process;GO:0044237//cellular metabolic process;GO:0006796//phosphate-containing compound metabolic process;GO:0009987//cellular process;GO:0008152//metabolic process
Unigene0010215	THO2	PREDICTED: THO complex subunit 2 isoform X1 [Nelumbo nucifera]	ko03040//Spliceosome//Transcription//Genetic Information Processing;ko03013//RNA transport//Translation//Genetic Information Processing	-	-	GO:0007165//signal transduction;GO:0050794//regulation of cellular process;GO:0050789//regulation of biological process;GO:0044700//single organism signaling;GO:0065007//biological regulation;GO:0009987//cellular process;GO:0007154//cell communication;GO:0044699//single-organism process;GO:0023052//signaling;GO:0035556//intracellular signal transduction;GO:0050896//response to stimulus;GO:0051716…
Unigene0010239	-	PREDICTED: protein IQ-DOMAIN 1-like [Elaeis guineensis]	-	-	-	-
Unigene0010264	rpsI	PREDICTED: 37S ribosomal protein S9, mitochondrial [Nelumbo nucifera]	ko03010//Ribosome//Translation//Genetic Information Processing	GO:0032991//macromolecular complex;GO:0005622//intracellular;GO:0030529//intracellular ribonucleoprotein complex;GO:0044424//intracellular part;GO:0005623//cell;GO:1990904//ribonucleoprotein complex;GO:0044464//cell part	-	GO:0008152//metabolic process;GO:0010467//gene expression;GO:0043170//macromolecule metabolic process;GO:0071704//organic substance metabolic process
Unigene0010327	-	WRC domain-containing protein [Cephalotus follicularis]	-	-	-	-
Unigene0010341	-	PREDICTED: muscle M-line assembly protein unc-89 [Nelumbo nucifera]	-	-	-	-
Unigene0010404	B3GALT6	PREDICTED: beta-1,6-galactosyltransferase GALT31A [Nelumbo nucifera]	-	GO:0031090//organelle membrane;GO:0044425//membrane part;GO:0016020//membrane;GO:0043226//organelle;GO:0044422//organelle part;GO:0031224//intrinsic component of membrane;GO:0043227//membrane-bounded organelle	GO:0016758//transferase activity, transferring hexosyl groups;GO:0003824//catalytic activity;GO:0008378//galactosyltransferase activity;GO:0016740//transferase activity;GO:0008194//UDP-glycosyltransferase activity;GO:0035250//UDP-galactosyltransferase activity;GO:0016757//transferase activity, transferring glycosyl groups	GO:0009890//negative regulation of biosynthetic process;GO:0050789//regulation of biological process;GO:0043412//macromolecule modification;GO:1903507//negative regulation of nucleic acid-templated transcription;GO:0009889//regulation of biosynthetic process;GO:0044710//single-organism metabolic process;GO:0006325//chromatin organization;GO:0048523//negative regulation of cellular process;GO:0044…
Unigene0010412	-	cytochrome c biogenesis Fc (mitochondrion) [Oryza minuta]	-	-	-	-
Unigene0010424	TRO	PREDICTED: LOW QUALITY PROTEIN: protein TRAUCO-like [Elaeis guineensis]	-	-	-	-
Unigene0010426	SUPT6H	PREDICTED: transcription elongation factor SPT6 homolog [Nelumbo nucifera]	-	-	-	GO:0051252//regulation of RNA metabolic process;GO:0019219//regulation of nucleobase-containing compound metabolic process;GO:0031326//regulation of cellular biosynthetic process;GO:2001141//regulation of RNA biosynthetic process;GO:0019222//regulation of metabolic process;GO:0050794//regulation of cellular process;GO:0065007//biological regulation;GO:0009889//regulation of biosynthetic process;G…
Unigene0010483	HVA22A	HVA22-like protein a [Anthurium amnicola]	-	GO:0044425//membrane part;GO:0016020//membrane;GO:0031224//intrinsic component of membrane	-	-
Unigene0010513	Os08g0360100	PREDICTED: CRM-domain containing factor CFM3, chloroplastic/mitochondrial [Nelumbo nucifera]	-	-	-	-
Unigene0010547	SNL4	PREDICTED: paired amphipathic helix protein Sin3-like 4 isoform X3 [Nelumbo nucifera]	-	-	-	GO:0019222//regulation of metabolic process;GO:0065007//biological regulation;GO:0050789//regulation of biological process;GO:0060255//regulation of macromolecule metabolic process;GO:0010468//regulation of gene expression
Unigene0010605	RPL7B	PREDICTED: 60S ribosomal protein L7-2 [Nelumbo nucifera]	ko03010//Ribosome//Translation//Genetic Information Processing	-	-	-
Unigene0010620	-	PREDICTED: uncharacterized protein LOC105795028 [Gossypium raimondii]	-	-	-	-
Unigene0010790	-	PREDICTED: uncharacterized protein LOC104604753 isoform X1 [Nelumbo nucifera]	-	-	-	-
Unigene0010803	At4g09670	PREDICTED: uncharacterized oxidoreductase At4g09670-like [Nicotiana attenuata]	-	-	-	-
Unigene0010855	APUM3	PREDICTED: pumilio homolog 2-like [Nelumbo nucifera]	-	-	-	-
Unigene0010990	-	--	-	-	-	-
Unigene0011040	-	PREDICTED: uncharacterized protein LOC104600519 isoform X1 [Nelumbo nucifera]	-	-	-	-
Unigene0011064	spast	PREDICTED: spastin isoform X1 [Citrus sinensis]	-	GO:0044464//cell part;GO:0005623//cell	GO:0036094//small molecule binding;GO:0001883//purine nucleoside binding;GO:0005488//binding;GO:0016462//pyrophosphatase activity;GO:0097159//organic cyclic compound binding;GO:0016818//hydrolase activity, acting on acid anhydrides, in phosphorus-containing anhydrides;GO:0001882//nucleoside binding;GO:1901363//heterocyclic compound binding;GO:0032549//ribonucleoside binding;GO:0097367//carbohydra…	GO:0034613//cellular protein localization;GO:0008104//protein localization;GO:0006886//intracellular protein transport;GO:0072662//protein localization to peroxisome;GO:0051179//localization;GO:0070727//cellular macromolecule localization;GO:0044710//single-organism metabolic process;GO:0032787//monocarboxylic acid metabolic process;GO:0006631//fatty acid metabolic process;GO:0015031//protein tra…
Unigene0011065	-	--	-	-	-	-
Unigene0011096	Odr4	PREDICTED: protein odr-4 homolog isoform X1 [Nelumbo nucifera]	-	-	-	-
Unigene0011124	xt	PREDICTED: beta-glucuronosyltransferase GlcAT14A [Nelumbo nucifera]	-	-	GO:0008194//UDP-glycosyltransferase activity;GO:0003824//catalytic activity;GO:0016757//transferase activity, transferring glycosyl groups;GO:0016740//transferase activity	GO:0071704//organic substance metabolic process;GO:0008152//metabolic process
Unigene0011130	mybl2	PREDICTED: transcription factor RAX2-like isoform X1 [Nelumbo nucifera]	-	-	-	-
Unigene0011134	-	PREDICTED: intracellular protein transport protein USO1-like [Prunus mume]	-	-	-	-
Unigene0011211	CYP86B1	PREDICTED: cytochrome P450 86B1 [Vitis vinifera]	ko00073//Cutin, suberine and wax biosynthesis//Lipid metabolism//Metabolism	-	GO:0043167//ion binding;GO:0046906//tetrapyrrole binding;GO:0043169//cation binding;GO:1901363//heterocyclic compound binding;GO:0016491//oxidoreductase activity;GO:0097159//organic cyclic compound binding;GO:0046914//transition metal ion binding;GO:0003824//catalytic activity;GO:0046872//metal ion binding;GO:0005488//binding	GO:0044699//single-organism process;GO:0044710//single-organism metabolic process;GO:0008152//metabolic process
Unigene0011283	CER1	protein ECERIFERUM 1 isoform X2 [Asparagus officinalis]	ko01110//Biosynthesis of secondary metabolites//Global and Overview//Metabolism;ko00073//Cutin, suberine and wax biosynthesis//Lipid metabolism//Metabolism	GO:0016020//membrane	-	GO:0044699//single-organism process;GO:0008152//metabolic process;GO:0044710//single-organism metabolic process
Unigene0011315	-	--	-	-	-	-
Unigene0011330	Ccdc22	PREDICTED: coiled-coil domain-containing protein 22 isoform X1 [Nelumbo nucifera]	-	-	-	-
Unigene0011376	PGK1	PREDICTED: phosphoglycerate kinase, cytosolic [Nelumbo nucifera]	ko01100//Metabolic pathways//Global and Overview//Metabolism;ko01110//Biosynthesis of secondary metabolites//Global and Overview//Metabolism;ko01130//Biosynthesis of antibiotics//Global and Overview//Metabolism;ko01120//Microbial metabolism in diverse environments//Global and Overview//Metabolism;ko01200//Carbon metabolism//Global and Overview//Metabolism;ko01230//Biosynthesis of amino acids//Glo…	-	-	-
Unigene0011417	Cyp313a3	PREDICTED: cytochrome P450 734A1-like [Nelumbo nucifera]	-	-	GO:0003824//catalytic activity;GO:0005488//binding	-
Unigene0011421	-	PREDICTED: uncharacterized protein LOC104592000 [Nelumbo nucifera]	-	-	-	-
Unigene0011443	RPL21A	PREDICTED: 60S ribosomal protein L21-2-like [Nelumbo nucifera]	ko03010//Ribosome//Translation//Genetic Information Processing	GO:0005622//intracellular;GO:0030529//intracellular ribonucleoprotein complex;GO:0044424//intracellular part;GO:0032991//macromolecular complex;GO:0005623//cell;GO:0044464//cell part;GO:1990904//ribonucleoprotein complex	-	GO:0043170//macromolecule metabolic process;GO:0071704//organic substance metabolic process;GO:0010467//gene expression;GO:0008152//metabolic process
Unigene0011478	PP2AB2	PREDICTED: serine/threonine protein phosphatase 2A 55 kDa regulatory subunit B beta isoform-like isoform X1 [Gossypium raimondii]	ko03015//mRNA surveillance pathway//Translation//Genetic Information Processing	-	-	-
Unigene0011482	ELC	PREDICTED: protein ELC-like [Nelumbo nucifera]	ko04144//Endocytosis//Transport and catabolism//Cellular Processes	-	-	GO:0033036//macromolecule localization;GO:0051179//localization;GO:0008104//protein localization
Unigene0011666	-	Chromodomain-helicase-DNA-binding protein Mi-2, partial [Anthurium amnicola]	-	-	-	-
Unigene0011704	RH21	PREDICTED: DEAD-box ATP-dependent RNA helicase 21 [Vitis vinifera]	ko03040//Spliceosome//Transcription//Genetic Information Processing	-	-	-
Unigene0011722	HIS2A	PREDICTED: histone H2AX [Theobroma cacao]	-	GO:0043231//intracellular membrane-bounded organelle;GO:0044464//cell part;GO:0005623//cell;GO:0043228//non-membrane-bounded organelle;GO:0043227//membrane-bounded organelle;GO:0044424//intracellular part;GO:0043232//intracellular non-membrane-bounded organelle;GO:0005622//intracellular;GO:0043226//organelle;GO:0043229//intracellular organelle	GO:1901363//heterocyclic compound binding;GO:0046983//protein dimerization activity;GO:0003676//nucleic acid binding;GO:0005488//binding;GO:0097159//organic cyclic compound binding;GO:0005515//protein binding	-
Unigene0012090	-	--	-	-	-	-
Unigene0012293	ssh4	SPla/RYanodine receptor domain-containing protein [Theobroma cacao]	-	-	-	-
Unigene0012363	MUR1	PREDICTED: GDP-mannose 4,6 dehydratase 1 [Vitis vinifera]	ko01100//Metabolic pathways//Global and Overview//Metabolism;ko00520//Amino sugar and nucleotide sugar metabolism//Carbohydrate metabolism//Metabolism;ko00051//Fructose and mannose metabolism//Carbohydrate metabolism//Metabolism	-	GO:0048037//cofactor binding;GO:0016836//hydro-lyase activity;GO:0016829//lyase activity;GO:0016835//carbon-oxygen lyase activity;GO:0005488//binding;GO:0003824//catalytic activity	GO:0009225//nucleotide-sugar metabolic process;GO:0046483//heterocycle metabolic process;GO:0009987//cellular process;GO:0008152//metabolic process;GO:0006139//nucleobase-containing compound metabolic process;GO:0044237//cellular metabolic process;GO:0071704//organic substance metabolic process;GO:1901360//organic cyclic compound metabolic process;GO:0006725//cellular aromatic compound metabolic …
Unigene0012436	ATX1	copper-binding family protein [Populus trichocarpa]	-	-	GO:0043167//ion binding;GO:0005488//binding;GO:0043169//cation binding	-
Unigene0012721	PAL	PREDICTED: phenylalanine ammonia-lyase-like [Nelumbo nucifera]	ko01100//Metabolic pathways//Global and Overview//Metabolism;ko01110//Biosynthesis of secondary metabolites//Global and Overview//Metabolism;ko00940//Phenylpropanoid biosynthesis//Biosynthesis of other secondary metabolites//Metabolism;ko00360//Phenylalanine metabolism//Amino acid metabolism//Metabolism	-	-	-
Unigene0012924	AP2M	PREDICTED: AP-2 complex subunit mu [Amborella trichopoda]	ko04144//Endocytosis//Transport and catabolism//Cellular Processes	GO:0044444//cytoplasmic part;GO:0005622//intracellular;GO:0030117//membrane coat;GO:0032991//macromolecular complex;GO:0005737//cytoplasm;GO:0005623//cell;GO:0016020//membrane;GO:0044424//intracellular part;GO:0043234//protein complex;GO:0044464//cell part;GO:0048475//coated membrane;GO:0044425//membrane part;GO:0098796//membrane protein complex;GO:0030119//AP-type membrane coat adaptor complex	GO:0005488//binding;GO:0043167//ion binding;GO:0043168//anion binding	GO:0006810//transport;GO:0008104//protein localization;GO:0008152//metabolic process;GO:0071702//organic substance transport;GO:0051179//localization;GO:0015031//protein transport;GO:0033036//macromolecule localization;GO:0051234//establishment of localization;GO:0045184//establishment of protein localization
Unigene0012925	AP2M	PREDICTED: AP-2 complex subunit mu [Musa acuminata subsp. malaccensis] [Musa acuminata]	ko04144//Endocytosis//Transport and catabolism//Cellular Processes	GO:0016020//membrane;GO:0005737//cytoplasm;GO:0030117//membrane coat;GO:0044444//cytoplasmic part;GO:0030119//AP-type membrane coat adaptor complex;GO:0043234//protein complex;GO:0005623//cell;GO:0098796//membrane protein complex;GO:0048475//coated membrane;GO:0044424//intracellular part;GO:0032991//macromolecular complex;GO:0005622//intracellular;GO:0044464//cell part;GO:0044425//membrane part	GO:0043168//anion binding;GO:0043167//ion binding;GO:0005488//binding	GO:0045184//establishment of protein localization;GO:0006810//transport;GO:0033036//macromolecule localization;GO:0051179//localization;GO:0008104//protein localization;GO:0008152//metabolic process;GO:0015031//protein transport;GO:0051234//establishment of localization;GO:0071702//organic substance transport
Unigene0013069	RDR6	PREDICTED: probable RNA-dependent RNA polymerase SHL2 [Elaeis guineensis]	-	-	GO:0016740//transferase activity;GO:1901363//heterocyclic compound binding;GO:0016772//transferase activity, transferring phosphorus-containing groups;GO:0003676//nucleic acid binding;GO:0097159//organic cyclic compound binding;GO:0016779//nucleotidyltransferase activity;GO:0003824//catalytic activity;GO:0005488//binding	GO:0044237//cellular metabolic process;GO:0031047//gene silencing by RNA;GO:0016441//posttranscriptional gene silencing;GO:0003006//developmental process involved in reproduction;GO:0090567//reproductive shoot system development;GO:0006396//RNA processing;GO:0009892//negative regulation of metabolic process;GO:0006807//nitrogen compound metabolic process;GO:0051716//cellular response to stimulus;…
Unigene0013498	At1g51650	ATP synthase epsilon chain [Arabidopsis thaliana]	ko01100//Metabolic pathways//Global and Overview//Metabolism;ko00190//Oxidative phosphorylation//Energy metabolism//Metabolism	GO:0005623//cell;GO:0031090//organelle membrane;GO:0043229//intracellular organelle;GO:0005622//intracellular;GO:0043227//membrane-bounded organelle;GO:0005737//cytoplasm;GO:0044424//intracellular part;GO:0043226//organelle;GO:0044429//mitochondrial part;GO:0005740//mitochondrial envelope;GO:0005739//mitochondrion;GO:0031967//organelle envelope;GO:0016020//membrane;GO:0044422//organelle part;GO:0…	GO:0005215//transporter activity;GO:0042625//ATPase coupled ion transmembrane transporter activity;GO:0022804//active transmembrane transporter activity;GO:0015405//P-P-bond-hydrolysis-driven transmembrane transporter activity;GO:0016820//hydrolase activity, acting on acid anhydrides, catalyzing transmembrane movement of substances;GO:0042623//ATPase activity, coupled;GO:0042626//ATPase activity,…	GO:0034641//cellular nitrogen compound metabolic process;GO:0071704//organic substance metabolic process;GO:0046034//ATP metabolic process;GO:0006818//hydrogen transport;GO:1901564//organonitrogen compound metabolic process;GO:0006810//transport;GO:1901659//glycosyl compound biosynthetic process;GO:0046390//ribose phosphate biosynthetic process;GO:1901293//nucleoside phosphate biosynthetic proces…
Unigene0013846	PRKRIP1	PREDICTED: PRKR-interacting protein 1 [Ipomoea nil]	-	-	-	-
Unigene0014009	GAMMACAL1	PREDICTED: gamma carbonic anhydrase-like 2, mitochondrial [Nelumbo nucifera]	-	-	-	-
Unigene0014010	GAMMACAL2	PREDICTED: gamma carbonic anhydrase-like 2, mitochondrial [Nelumbo nucifera]	-	-	-	-
Unigene0014030	-	PREDICTED: uncharacterized protein LOC102606851 isoform X1 [Citrus sinensis]	-	-	-	-
Unigene0014031	-	PREDICTED: uncharacterized protein LOC102606851 isoform X1 [Citrus sinensis]	-	-	-	-
Unigene0014125	nusG	uncharacterized LOC107899023 [Gossypium hirsutum]	-	-	-	GO:0010467//gene expression;GO:0019637//organophosphate metabolic process;GO:0006996//organelle organization;GO:0006796//phosphate-containing compound metabolic process;GO:0044271//cellular nitrogen compound biosynthetic process;GO:0009059//macromolecule biosynthetic process;GO:0006139//nucleobase-containing compound metabolic process;GO:0009657//plastid organization;GO:0034641//cellular nitrogen…
Unigene0014160	AAE1	PREDICTED: probable acyl-activating enzyme 1, peroxisomal isoform X1 [Vitis vinifera]	-	-	GO:0016874//ligase activity;GO:0016877//ligase activity, forming carbon-sulfur bonds;GO:0016405//CoA-ligase activity;GO:0003824//catalytic activity	-
Unigene0014219	IQD14	PREDICTED: protein IQ-DOMAIN 14-like [Nelumbo nucifera]	-	-	-	-
Unigene0014416	trmH	OBP33pep like protein isoform 1 [Theobroma cacao]	-	GO:0044464//cell part;GO:0005623//cell	GO:0003824//catalytic activity;GO:0005488//binding;GO:0016740//transferase activity;GO:0003676//nucleic acid binding;GO:0016741//transferase activity, transferring one-carbon groups;GO:0097159//organic cyclic compound binding;GO:0008168//methyltransferase activity;GO:1901363//heterocyclic compound binding	GO:0043170//macromolecule metabolic process;GO:0072662//protein localization to peroxisome;GO:0009056//catabolic process;GO:0044238//primary metabolic process;GO:0071702//organic substance transport;GO:0046395//carboxylic acid catabolic process;GO:0071840//cellular component organization or biogenesis;GO:0009987//cellular process;GO:0009062//fatty acid catabolic process;GO:1902578//single-organis…
Unigene0014498	rhmA	PREDICTED: 2-keto-3-deoxy-L-rhamnonate aldolase [Ricinus communis]	-	-	GO:0003824//catalytic activity;GO:0016829//lyase activity;GO:0016832//aldehyde-lyase activity;GO:0016830//carbon-carbon lyase activity	-
Unigene0014499	rhmA	PREDICTED: 2-keto-3-deoxy-L-rhamnonate aldolase [Ricinus communis]	-	-	GO:0003824//catalytic activity;GO:0016830//carbon-carbon lyase activity;GO:0016829//lyase activity;GO:0016832//aldehyde-lyase activity	-
Unigene0014799	At1g32060	PREDICTED: phosphoribulokinase, chloroplastic-like [Nelumbo nucifera]	ko01100//Metabolic pathways//Global and Overview//Metabolism;ko01120//Microbial metabolism in diverse environments//Global and Overview//Metabolism;ko01200//Carbon metabolism//Global and Overview//Metabolism;ko00710//Carbon fixation in photosynthetic organisms//Energy metabolism//Metabolism	GO:0009532//plastid stroma;GO:0043229//intracellular organelle;GO:0044424//intracellular part;GO:0044422//organelle part;GO:0005737//cytoplasm;GO:0005623//cell;GO:0031967//organelle envelope;GO:0009507//chloroplast;GO:0043226//organelle;GO:0044446//intracellular organelle part;GO:0043227//membrane-bounded organelle;GO:0044444//cytoplasmic part;GO:0005622//intracellular;GO:0044464//cell part;GO:00…	GO:0036094//small molecule binding;GO:1901363//heterocyclic compound binding;GO:0097367//carbohydrate derivative binding;GO:0005488//binding;GO:0016772//transferase activity, transferring phosphorus-containing groups;GO:0001882//nucleoside binding;GO:0016740//transferase activity;GO:0003824//catalytic activity;GO:0032550//purine ribonucleoside binding;GO:0001883//purine nucleoside binding;GO:0097…	GO:1901701//cellular response to oxygen-containing compound;GO:0006461//protein complex assembly;GO:0044710//single-organism metabolic process;GO:1901576//organic substance biosynthetic process;GO:0042221//response to chemical;GO:0031399//regulation of protein modification process;GO:0000096//sulfur amino acid metabolic process;GO:0006796//phosphate-containing compound metabolic process;GO:000975…
Unigene0015066	POLE3	PREDICTED: DNA polymerase epsilon subunit D [Eucalyptus grandis]	ko01100//Metabolic pathways//Global and Overview//Metabolism;ko03030//DNA replication//Replication and repair//Genetic Information Processing;ko00230//Purine metabolism//Nucleotide metabolism//Metabolism;ko00240//Pyrimidine metabolism//Nucleotide metabolism//Metabolism;ko03420//Nucleotide excision repair//Replication and repair//Genetic Information Processing;ko03410//Base excision repair//Replic…	GO:0005622//intracellular;GO:0043229//intracellular organelle;GO:0043227//membrane-bounded organelle;GO:0043231//intracellular membrane-bounded organelle;GO:0043226//organelle;GO:0005623//cell;GO:0044464//cell part;GO:0044424//intracellular part	GO:0003677//DNA binding;GO:0005488//binding;GO:0003676//nucleic acid binding;GO:0097159//organic cyclic compound binding;GO:0046983//protein dimerization activity;GO:0005515//protein binding;GO:1901363//heterocyclic compound binding	GO:0060255//regulation of macromolecule metabolic process;GO:0065007//biological regulation;GO:0019222//regulation of metabolic process;GO:0010468//regulation of gene expression;GO:0050789//regulation of biological process
Unigene0015099	CXE17	PREDICTED: probable carboxylesterase 15 [Nelumbo nucifera]	-	-	GO:0003824//catalytic activity	-
Unigene0015242	-	PREDICTED: uncharacterized protein LOC104606490 [Nelumbo nucifera]	-	-	-	-
Unigene0015327	-	--	-	-	-	-
Unigene0015365	-	--	-	-	-	-
Unigene0015444	SMT2	PREDICTED: 24-methylenesterol C-methyltransferase 2 [Nelumbo nucifera]	ko01110//Biosynthesis of secondary metabolites//Global and Overview//Metabolism;ko00100//Steroid biosynthesis//Lipid metabolism//Metabolism	-	GO:0016741//transferase activity, transferring one-carbon groups;GO:0008757//S-adenosylmethionine-dependent methyltransferase activity;GO:0016740//transferase activity;GO:0008168//methyltransferase activity;GO:0003824//catalytic activity	GO:0008152//metabolic process
Unigene0015547	nfrkb	PREDICTED: uncharacterized protein LOC104599217 [Nelumbo nucifera]	-	-	-	GO:0071840//cellular component organization or biogenesis;GO:0034641//cellular nitrogen compound metabolic process;GO:0051321//meiotic cell cycle;GO:0043170//macromolecule metabolic process;GO:0048285//organelle fission;GO:0044699//single-organism process;GO:0044702//single organism reproductive process;GO:0006996//organelle organization;GO:0090304//nucleic acid metabolic process;GO:0044260//cell…
Unigene0015676	CXE11	PREDICTED: probable carboxylesterase 11 [Vitis vinifera]	-	-	-	-
Unigene0015677	CXE11	PREDICTED: probable carboxylesterase 11 [Vitis vinifera]	-	-	GO:0003824//catalytic activity	-
Unigene0015698	-	--	-	-	-	-
Unigene0015987	SPBC1703.11	PREDICTED: OPA3-like protein [Musa acuminata subsp. malaccensis] [Musa acuminata]	-	-	-	-
Unigene0015988	SPBC1703.11	PREDICTED: OPA3-like protein [Musa acuminata subsp. malaccensis] [Musa acuminata]	-	-	-	-
Unigene0016118	FAO1	PREDICTED: long-chain-alcohol oxidase FAO2 [Elaeis guineensis]	-	-	-	-
Unigene0016267	DHAR2	PREDICTED: glutathione S-transferase DHAR2 [Amborella trichopoda]	-	-	-	-
Unigene0016335	-	PREDICTED: uncharacterized protein LOC104601793 [Nelumbo nucifera]	-	-	-	-
Unigene0016486	TCP11	T-complex protein 11-like protein 1 [Ananas comosus]	-	-	-	-
Unigene0016682	TOGT1	PREDICTED: UDP-glucose flavonoid 3-O-glucosyltransferase 7-like [Fragaria vesca subsp. vesca] [Fragaria vesca]	-	-	GO:0016757//transferase activity, transferring glycosyl groups;GO:0016740//transferase activity;GO:0003824//catalytic activity	-
Unigene0016683	TOGT1	PREDICTED: scopoletin glucosyltransferase [Theobroma cacao]	-	-	GO:0016757//transferase activity, transferring glycosyl groups;GO:0003824//catalytic activity;GO:0016740//transferase activity	-
Unigene0017288	SODCC.1	superoxide dismutase, partial [Fagus sylvatica]	ko04146//Peroxisome//Transport and catabolism//Cellular Processes	-	-	-
Unigene0017290	CCR1	PREDICTED: cinnamoyl-CoA reductase 1 [Vitis vinifera]	-	-	GO:0005488//binding;GO:0048037//cofactor binding	-
Unigene0017291	CCR1	PREDICTED: cinnamoyl-CoA reductase 1 [Vitis vinifera]	-	-	GO:0048037//cofactor binding;GO:0005488//binding;GO:0016616//oxidoreductase activity, acting on the CH-OH group of donors, NAD or NADP as acceptor;GO:0016491//oxidoreductase activity;GO:0003824//catalytic activity;GO:0016614//oxidoreductase activity, acting on CH-OH group of donors	GO:0044699//single-organism process;GO:0008152//metabolic process;GO:0044710//single-organism metabolic process;GO:0022414//reproductive process;GO:0003006//developmental process involved in reproduction;GO:0000003//reproduction;GO:0032502//developmental process
Unigene0017629	CHS	Chal_sti_synt_N domain-containing protein/Chal_sti_synt_C domain-containing protein [Cephalotus follicularis]	ko01100//Metabolic pathways//Global and Overview//Metabolism;ko01110//Biosynthesis of secondary metabolites//Global and Overview//Metabolism;ko04712//Circadian rhythm - plant//Environmental adaptation//Organismal Systems;ko00941//Flavonoid biosynthesis//Biosynthesis of other secondary metabolites//Metabolism	-	GO:0016740//transferase activity;GO:0016746//transferase activity, transferring acyl groups;GO:0016747//transferase activity, transferring acyl groups other than amino-acyl groups;GO:0003824//catalytic activity	GO:0008152//metabolic process;GO:0009812//flavonoid metabolic process;GO:0071704//organic substance metabolic process
Unigene0018235	PUB38	PREDICTED: U-box domain-containing protein 38 [Nelumbo nucifera]	-	-	-	-
Unigene0018314	-	--	-	-	-	-
Unigene0018466	-	PREDICTED: mediator of RNA polymerase II transcription subunit 1 [Vitis vinifera]	-	-	-	-
Unigene0018505	CYCB1-2	PREDICTED: cyclin-B1-2 [Nelumbo nucifera]	ko03050//Proteasome//Folding, sorting and degradation//Genetic Information Processing	-	-	-
Unigene0018578	SAP4	PREDICTED: zinc finger A20 and AN1 domain-containing stress-associated protein 4 [Vitis vinifera]	-	-	-	-
Unigene0018579	SAP4	PREDICTED: zinc finger A20 and AN1 domain-containing stress-associated protein 4 [Vitis vinifera]	-	-	-	-
Unigene0018597	CLV1	PREDICTED: receptor protein kinase CLAVATA1 [Vitis vinifera]	-	GO:0016020//membrane	GO:0016740//transferase activity;GO:0004672//protein kinase activity;GO:0005515//protein binding;GO:0005057//receptor signaling protein activity;GO:0016772//transferase activity, transferring phosphorus-containing groups;GO:0016301//kinase activity;GO:0004702//receptor signaling protein serine/threonine kinase activity;GO:0016491//oxidoreductase activity;GO:0003824//catalytic activity;GO:0004871/…	GO:0016310//phosphorylation;GO:0007154//cell communication;GO:0065007//biological regulation;GO:0044767//single-organism developmental process;GO:0019538//protein metabolic process;GO:0006464//cellular protein modification process;GO:0050896//response to stimulus;GO:0006793//phosphorus metabolic process;GO:0071704//organic substance metabolic process;GO:0044267//cellular protein metabolic process…
Unigene0018630	-	PREDICTED: uncharacterized protein LOC100266500 [Vitis vinifera]	-	-	-	-
Unigene0018687	-	PREDICTED: uncharacterized protein LOC102627984 [Citrus sinensis]	-	-	-	-
Unigene0019054	SRRM2	PREDICTED: sarcoplasmic reticulum histidine-rich calcium-binding protein-like [Nelumbo nucifera]	-	-	-	-
Unigene0019101	ATL6	PREDICTED: E3 ubiquitin-protein ligase ATL6-like [Nelumbo nucifera]	-	-	-	-
Unigene0019263	-	PREDICTED: centrosomal protein of 290 kDa-like isoform X2 [Nelumbo nucifera]	-	-	-	-
Unigene0019328	Os01g0270100	PREDICTED: cysteine proteinase inhibitor 12 [Phoenix dactylifera]	-	-	-	-
Unigene0019424	Zcchc10	PREDICTED: zinc finger CCHC domain-containing protein 10 [Phoenix dactylifera]	-	-	-	-
Unigene0019495	RANBP1C	PREDICTED: ran-binding protein 1 homolog c [Eucalyptus grandis]	-	-	-	-
Unigene0019565	RANGAP1	RAN GTPase-activating protein 1 [Anthurium amnicola]	ko03013//RNA transport//Translation//Genetic Information Processing	-	-	-
Unigene0019566	RANGAP1	RAN GTPase-activating protein 1 [Anthurium amnicola]	ko03013//RNA transport//Translation//Genetic Information Processing	-	-	-
Unigene0019569	-	--	-	-	-	-
Unigene0020244	-	TAC1 [Prunus persica]	-	-	-	-
Unigene0020633	SCPL50	PREDICTED: serine carboxypeptidase-like 50 [Nelumbo nucifera]	-	-	GO:0008233//peptidase activity;GO:0070011//peptidase activity, acting on L-amino acid peptides;GO:0004180//carboxypeptidase activity;GO:0016787//hydrolase activity;GO:0008238//exopeptidase activity;GO:0003824//catalytic activity	GO:0071704//organic substance metabolic process;GO:0044238//primary metabolic process;GO:0008152//metabolic process;GO:0043170//macromolecule metabolic process;GO:0019538//protein metabolic process
Unigene0020980	PSAP	PREDICTED: prosaposin [Prunus mume]	-	-	-	-
Unigene0021225	MIP1	PREDICTED: MND1-interacting protein 1 [Vitis vinifera]	-	-	-	-
Unigene0021389	ATJ6	PREDICTED: chaperone protein dnaJ 6-like [Nelumbo nucifera]	-	-	-	-
Unigene0021689	OAT	ornithine aminotransferase, mitochondrial isoform X1 [Ananas comosus]	ko01100//Metabolic pathways//Global and Overview//Metabolism;ko01110//Biosynthesis of secondary metabolites//Global and Overview//Metabolism;ko01130//Biosynthesis of antibiotics//Global and Overview//Metabolism;ko00330//Arginine and proline metabolism//Amino acid metabolism//Metabolism	-	-	-
Unigene0021703	GRXC1	glutaredoxin, partial [Chimonanthus praecox]	-	-	GO:0016491//oxidoreductase activity;GO:0016667//oxidoreductase activity, acting on a sulfur group of donors;GO:0003824//catalytic activity;GO:0015036//disulfide oxidoreductase activity	GO:0042592//homeostatic process;GO:0044763//single-organism cellular process;GO:0065008//regulation of biological quality;GO:0019725//cellular homeostasis;GO:0044699//single-organism process;GO:0008152//metabolic process;GO:0065007//biological regulation;GO:0044710//single-organism metabolic process;GO:0009987//cellular process
Unigene0021907	-	PREDICTED: uncharacterized protein LOC105636401 [Jatropha curcas]	-	-	-	-
Unigene0021919	-	PREDICTED: transmembrane protein 33 homolog [Juglans regia]	-	GO:0044425//membrane part;GO:0005911//cell-cell junction;GO:0016020//membrane;GO:0043231//intracellular membrane-bounded organelle;GO:0031224//intrinsic component of membrane;GO:0044464//cell part;GO:0043229//intracellular organelle;GO:0005623//cell;GO:0005622//intracellular;GO:0030054//cell junction;GO:0043227//membrane-bounded organelle;GO:0043226//organelle;GO:0044424//intracellular part	-	-
Unigene0021922	SHM6	PREDICTED: serine hydroxymethyltransferase 7 [Nelumbo nucifera]	ko01100//Metabolic pathways//Global and Overview//Metabolism;ko01110//Biosynthesis of secondary metabolites//Global and Overview//Metabolism;ko01130//Biosynthesis of antibiotics//Global and Overview//Metabolism;ko01120//Microbial metabolism in diverse environments//Global and Overview//Metabolism;ko01200//Carbon metabolism//Global and Overview//Metabolism;ko01230//Biosynthesis of amino acids//Glo…	-	GO:0016740//transferase activity;GO:0043167//ion binding;GO:0043168//anion binding;GO:0005488//binding;GO:0016741//transferase activity, transferring one-carbon groups;GO:0003824//catalytic activity;GO:0016742//hydroxymethyl-, formyl- and related transferase activity	GO:0044710//single-organism metabolic process;GO:0044763//single-organism cellular process;GO:0043436//oxoacid metabolic process;GO:0044237//cellular metabolic process;GO:1901605//alpha-amino acid metabolic process;GO:0006520//cellular amino acid metabolic process;GO:0071704//organic substance metabolic process;GO:0006730//one-carbon metabolic process;GO:0044281//small molecule metabolic process;…
Unigene0021971	-	--	-	-	-	-
Unigene0022021	BHLH112	PREDICTED: transcription factor bHLH112 isoform X1 [Vitis vinifera]	-	-	-	GO:0009987//cellular process
Unigene0022022	BHLH123	PREDICTED: transcription factor bHLH112-like [Nelumbo nucifera]	-	-	-	-
Unigene0022520	FAM210B	Protein FAM210B, partial [Anthurium amnicola]	-	GO:0043227//membrane-bounded organelle;GO:0005737//cytoplasm;GO:0009507//chloroplast;GO:0043231//intracellular membrane-bounded organelle;GO:0044424//intracellular part;GO:0043229//intracellular organelle;GO:0044464//cell part;GO:0044444//cytoplasmic part;GO:0009536//plastid;GO:0043226//organelle;GO:0005623//cell;GO:0005622//intracellular	-	GO:0044767//single-organism developmental process;GO:0009987//cellular process;GO:0032502//developmental process;GO:0044699//single-organism process
Unigene0022586	LHP1	PREDICTED: chromo domain-containing protein LHP1-like isoform X2 [Nelumbo nucifera]	-	-	-	GO:0009889//regulation of biosynthetic process;GO:0051276//chromosome organization;GO:0032502//developmental process;GO:0048731//system development;GO:0044763//single-organism cellular process;GO:0043933//macromolecular complex subunit organization;GO:0007275//multicellular organism development;GO:0048856//anatomical structure development;GO:0071840//cellular component organization or biogenesis;…
Unigene0022658	ALS	PREDICTED: acetolactate synthase 3, chloroplastic [Ricinus communis]	ko01100//Metabolic pathways//Global and Overview//Metabolism;ko01110//Biosynthesis of secondary metabolites//Global and Overview//Metabolism;ko01130//Biosynthesis of antibiotics//Global and Overview//Metabolism;ko01230//Biosynthesis of amino acids//Global and Overview//Metabolism;ko01210//2-Oxocarboxylic acid metabolism//Global and Overview//Metabolism;ko00770//Pantothenate and CoA biosynthesis//…	GO:0044444//cytoplasmic part;GO:0043226//organelle;GO:0005622//intracellular;GO:0043229//intracellular organelle;GO:0005737//cytoplasm;GO:0005623//cell;GO:0044446//intracellular organelle part;GO:0009536//plastid;GO:0009532//plastid stroma;GO:0044435//plastid part;GO:0044424//intracellular part;GO:0044464//cell part;GO:0044422//organelle part;GO:0043231//intracellular membrane-bounded organelle;G…	GO:0036094//small molecule binding;GO:0043169//cation binding;GO:1901363//heterocyclic compound binding;GO:1901265//nucleoside phosphate binding;GO:0016740//transferase activity;GO:0000166//nucleotide binding;GO:0097159//organic cyclic compound binding;GO:0003824//catalytic activity;GO:0005488//binding;GO:0043167//ion binding;GO:0016744//transferase activity, transferring aldehyde or ketonic grou…	GO:0006950//response to stress;GO:0006807//nitrogen compound metabolic process;GO:0006082//organic acid metabolic process;GO:0016053//organic acid biosynthetic process;GO:0046394//carboxylic acid biosynthetic process;GO:0044281//small molecule metabolic process;GO:1901576//organic substance biosynthetic process;GO:0006573//valine metabolic process;GO:0044711//single-organism biosynthetic process;…
Unigene0022995	-	--	-	-	-	-
Unigene0023115	-	--	-	-	-	-
Unigene0023187	NAF1	PREDICTED: H/ACA ribonucleoprotein complex non-core subunit NAF1-like [Nelumbo nucifera]	-	-	-	-
Unigene0023258	IP5P8	PREDICTED: type I inositol 1,4,5-trisphosphate 5-phosphatase CVP2 [Cicer arietinum]	ko01100//Metabolic pathways//Global and Overview//Metabolism;ko00562//Inositol phosphate metabolism//Carbohydrate metabolism//Metabolism;ko04070//Phosphatidylinositol signaling system//Signal transduction//Environmental Information Processing	-	-	-
Unigene0023303	-	Methylenetetrahydrofolate--tRNA-(uracil-5-)-methyltransferase TrmFO, partial [Anthurium amnicola]	-	-	-	-
Unigene0023385	-	hypothetical protein JCGZ_00710 [Jatropha curcas]	-	-	-	-
Unigene0023504	-	PREDICTED: PRKR-interacting protein 1 homolog [Oryza brachyantha]	-	-	-	-
Unigene0023640	-	--	-	-	-	-
Unigene0023641	-	--	-	-	-	-
Unigene0023774	ABCF5	PREDICTED: ABC transporter F family member 5-like [Phoenix dactylifera]	-	-	-	-
Unigene0023869	Mmtag2	MMtag domain-containing protein [Cephalotus follicularis]	-	-	-	-
Unigene0024304	EMB1025	PREDICTED: pentatricopeptide repeat-containing protein At4g11690-like [Vitis vinifera]	-	-	-	-
Unigene0024305	EMB1025	PREDICTED: pentatricopeptide repeat-containing protein At4g11690-like [Vitis vinifera]	-	-	-	-
Unigene0024390	-	--	-	-	-	-
Unigene0024442	UGT92A1	PREDICTED: UDP-glycosyltransferase 92A1-like [Nelumbo nucifera]	-	-	GO:0003824//catalytic activity;GO:0016740//transferase activity;GO:0016757//transferase activity, transferring glycosyl groups	-
Unigene0024459	DAGLB	Sn1-specific diacylglycerol lipase beta [Morus notabilis]	-	-	-	-
Unigene0024578	-	PREDICTED: uncharacterized protein LOC104610075 isoform X2 [Nelumbo nucifera]	-	-	-	-
Unigene0024589	LCY1	PREDICTED: lycopene beta cyclase, chloroplastic/chromoplastic [Nelumbo nucifera]	ko01100//Metabolic pathways//Global and Overview//Metabolism;ko01110//Biosynthesis of secondary metabolites//Global and Overview//Metabolism;ko00906//Carotenoid biosynthesis//Metabolism of terpenoids and polyketides//Metabolism	-	GO:0016853//isomerase activity;GO:0003824//catalytic activity;GO:0016491//oxidoreductase activity;GO:0016860//intramolecular oxidoreductase activity	GO:0044699//single-organism process;GO:0044710//single-organism metabolic process;GO:0008152//metabolic process
Unigene0024617	At2g44510	PREDICTED: protein BCCIP homolog isoform X1 [Nelumbo nucifera]	-	-	-	-
Unigene0024618	At2g44510	PREDICTED: protein BCCIP homolog isoform X1 [Nelumbo nucifera]	-	-	-	-
Unigene0024681	-	unnamed protein product [Coffea canephora]	-	-	-	-
Unigene0024781	At2g29290	PREDICTED: tropinone reductase homolog At1g07440-like isoform X2 [Juglans regia]	ko01100//Metabolic pathways//Global and Overview//Metabolism;ko01110//Biosynthesis of secondary metabolites//Global and Overview//Metabolism;ko00960//Tropane, piperidine and pyridine alkaloid biosynthesis//Biosynthesis of other secondary metabolites//Metabolism	-	GO:0003824//catalytic activity	-
Unigene0024783	At2g29340	tropinone reductase homolog At5g06060-like isoform X3 [Asparagus officinalis]	ko01100//Metabolic pathways//Global and Overview//Metabolism;ko01110//Biosynthesis of secondary metabolites//Global and Overview//Metabolism;ko00960//Tropane, piperidine and pyridine alkaloid biosynthesis//Biosynthesis of other secondary metabolites//Metabolism	-	-	-
Unigene0024914	-	Apurinic endonuclease-redox protein [Anthurium amnicola]	-	-	-	-
Unigene0025226	-	Tetratricopeptide-like helical [Corchorus capsularis]	-	-	-	-
Unigene0025238	RAP2-3	PREDICTED: ethylene-responsive transcription factor ERF071 [Ziziphus jujuba]	-	-	-	-
Unigene0025247	RH56	PREDICTED: DEAD-box ATP-dependent RNA helicase 56 [Nelumbo nucifera]	-	-	-	-
Unigene0025352	At1g05910	PREDICTED: ATPase family AAA domain-containing protein At1g05910 [Vitis vinifera]	-	-	GO:0003824//catalytic activity;GO:0016787//hydrolase activity	-
Unigene0025358	-	hypothetical protein POPTR_0005s11710g [Populus trichocarpa]	-	-	-	-
Unigene0025404	OEP37	PREDICTED: outer envelope pore protein 37, chloroplastic [Nelumbo nucifera]	-	-	-	-
Unigene0025431	ACS10	PREDICTED: probable aminotransferase ACS10 [Theobroma cacao]	-	-	GO:0043167//ion binding;GO:0005488//binding;GO:0016769//transferase activity, transferring nitrogenous groups;GO:0008483//transaminase activity;GO:0016740//transferase activity;GO:0003824//catalytic activity;GO:0043168//anion binding	GO:0044281//small molecule metabolic process;GO:0071704//organic substance metabolic process;GO:0044237//cellular metabolic process;GO:0019752//carboxylic acid metabolic process;GO:0006082//organic acid metabolic process;GO:0043436//oxoacid metabolic process;GO:0008152//metabolic process;GO:0044699//single-organism process;GO:0009987//cellular process;GO:0044763//single-organism cellular process;…
Unigene0025451	-	C2H2-like zinc finger protein [Theobroma cacao]	-	-	-	-
Unigene0025452	-	C2H2-like zinc finger protein [Theobroma cacao]	-	-	-	GO:0008152//metabolic process
Unigene0025533	HSP83A	PREDICTED: heat shock protein 83 [Populus euphratica]	ko04141//Protein processing in endoplasmic reticulum//Folding, sorting and degradation//Genetic Information Processing;ko04626//Plant-pathogen interaction//Environmental adaptation//Organismal Systems	-	GO:0005515//protein binding;GO:0005488//binding	GO:0044267//cellular protein metabolic process;GO:0008152//metabolic process;GO:0043170//macromolecule metabolic process;GO:0044238//primary metabolic process;GO:0019538//protein metabolic process;GO:0071704//organic substance metabolic process;GO:0009987//cellular process;GO:0044237//cellular metabolic process;GO:0044260//cellular macromolecule metabolic process;GO:0050896//response to stimulus
Unigene0025604	GAOA	PREDICTED: aldehyde oxidase GLOX [Nelumbo nucifera]	-	-	-	-
Unigene0025760	Marf1	PREDICTED: meiosis arrest female protein 1 homolog [Prunus mume]	-	-	-	-
Unigene0025953	RPN7	PREDICTED: 26S proteasome non-ATPase regulatory subunit 6 homolog [Pyrus x bretschneideri]	ko03050//Proteasome//Folding, sorting and degradation//Genetic Information Processing	-	-	-
Unigene0026113	-	Bifunctional methyltransferase, partial [Anthurium amnicola]	-	GO:0044434//chloroplast part;GO:0043229//intracellular organelle;GO:0044444//cytoplasmic part;GO:0005622//intracellular;GO:0009536//plastid;GO:0031967//organelle envelope;GO:0005623//cell;GO:0044424//intracellular part;GO:0009507//chloroplast;GO:0043231//intracellular membrane-bounded organelle;GO:0031975//envelope;GO:0043226//organelle;GO:0044446//intracellular organelle part;GO:0044435//plastid…	-	-
Unigene0026292	-	PREDICTED: glucosidase 2 subunit beta [Phoenix dactylifera]	-	-	-	-
Unigene0026352	SAP9	PREDICTED: zinc finger A20 and AN1 domain-containing stress-associated protein 6-like [Nelumbo nucifera]	-	-	-	-
Unigene0026353	SAP9	PREDICTED: zinc finger A20 and AN1 domain-containing stress-associated protein 6-like [Nelumbo nucifera]	-	-	-	-
Unigene0026379	RAN-B1	BnaC02g13240D [Brassica napus]	ko03013//RNA transport//Translation//Genetic Information Processing;ko03008//Ribosome biogenesis in eukaryotes//Translation//Genetic Information Processing	-	GO:0016462//pyrophosphatase activity;GO:0016787//hydrolase activity;GO:0017111//nucleoside-triphosphatase activity;GO:0032550//purine ribonucleoside binding;GO:0016818//hydrolase activity, acting on acid anhydrides, in phosphorus-containing anhydrides;GO:0001882//nucleoside binding;GO:0016817//hydrolase activity, acting on acid anhydrides;GO:0001883//purine nucleoside binding;GO:0097159//organic …	GO:0044763//single-organism cellular process;GO:0051641//cellular localization;GO:0007165//signal transduction;GO:0046907//intracellular transport;GO:0051234//establishment of localization;GO:0033036//macromolecule localization;GO:0044700//single organism signaling;GO:0051649//establishment of localization in cell;GO:0065007//biological regulation;GO:0051179//localization;GO:0007154//cell communi…
Unigene0026597	At5g03900	iron-sulfur cluster biosynthesis family protein, partial [Chimonanthus praecox]	-	-	-	-
Unigene0026753	Snd1	PREDICTED: staphylococcal nuclease domain-containing protein 1 [Nelumbo nucifera]	-	-	-	GO:0065007//biological regulation;GO:0009987//cellular process;GO:0060255//regulation of macromolecule metabolic process;GO:0010605//negative regulation of macromolecule metabolic process;GO:0016458//gene silencing;GO:0010468//regulation of gene expression;GO:0010629//negative regulation of gene expression;GO:0044763//single-organism cellular process;GO:0019222//regulation of metabolic process;GO…
Unigene0026832	AMY1.1	PREDICTED: pentatricopeptide repeat-containing protein At2g04860 [Nelumbo nucifera]	ko01100//Metabolic pathways//Global and Overview//Metabolism;ko00500//Starch and sucrose metabolism//Carbohydrate metabolism//Metabolism	-	-	-
Unigene0026840	KRI1	PREDICTED: protein KRI1 homolog [Nelumbo nucifera]	-	-	-	-
Unigene0026937	SPAC56F8.03	PREDICTED: eukaryotic translation initiation factor 5B-like [Nelumbo nucifera]	ko03013//RNA transport//Translation//Genetic Information Processing	-	-	-
Unigene0026938	SPAC56F8.03	PREDICTED: eukaryotic translation initiation factor 5B-like [Nelumbo nucifera]	ko03013//RNA transport//Translation//Genetic Information Processing	-	GO:0097159//organic cyclic compound binding;GO:0005488//binding;GO:1901363//heterocyclic compound binding	-
Unigene0026961	CDC73	PREDICTED: protein CDC73 homolog [Nelumbo nucifera]	-	-	-	GO:0044707//single-multicellular organism process;GO:0048856//anatomical structure development;GO:0032502//developmental process;GO:0048731//system development;GO:0007275//multicellular organism development;GO:0000003//reproduction;GO:0044699//single-organism process;GO:0044767//single-organism developmental process;GO:0061458//reproductive system development;GO:0048608//reproductive structure de…
Unigene0026971	grpE	PREDICTED: protein GrpE-like [Phoenix dactylifera]	-	-	-	-
Unigene0026998	HIPP26	PREDICTED: heavy metal-associated isoprenylated plant protein 3-like [Nelumbo nucifera]	-	-	-	-
Unigene0027030	VPS13A	PREDICTED: uncharacterized protein LOC105035160 isoform X1 [Elaeis guineensis]	-	-	-	-
Unigene0027172	PSK5	PREDICTED: phytosulfokines 2 [Elaeis guineensis]	-	-	-	-
Unigene0027315	At1g67750	PREDICTED: probable pectate lyase 18 isoform X1 [Lupinus angustifolius]	ko00040//Pentose and glucuronate interconversions//Carbohydrate metabolism//Metabolism	-	GO:0016829//lyase activity;GO:0043167//ion binding;GO:0016837//carbon-oxygen lyase activity, acting on polysaccharides;GO:0003824//catalytic activity;GO:0043169//cation binding;GO:0005488//binding;GO:0016835//carbon-oxygen lyase activity	GO:0005975//carbohydrate metabolic process;GO:0043170//macromolecule metabolic process;GO:0005976//polysaccharide metabolic process;GO:0009056//catabolic process;GO:1901575//organic substance catabolic process;GO:0000272//polysaccharide catabolic process;GO:0008152//metabolic process;GO:0016052//carbohydrate catabolic process;GO:0044238//primary metabolic process;GO:0009057//macromolecule catabol…
Unigene0027397	DVR	NAD(P)-binding Rossmann-fold superfamily protein [Theobroma cacao]	-	GO:0044435//plastid part;GO:0044464//cell part;GO:0043226//organelle;GO:0044424//intracellular part;GO:0031984//organelle subcompartment;GO:0044422//organelle part;GO:0031976//plastid thylakoid;GO:0043227//membrane-bounded organelle;GO:0043231//intracellular membrane-bounded organelle;GO:0005623//cell;GO:0044444//cytoplasmic part;GO:0009579//thylakoid;GO:0044446//intracellular organelle part;GO:0…	-	GO:0065003//macromolecular complex assembly;GO:0044281//small molecule metabolic process;GO:0044255//cellular lipid metabolic process;GO:0044271//cellular nitrogen compound biosynthetic process;GO:0006090//pyruvate metabolic process;GO:0043170//macromolecule metabolic process;GO:1901576//organic substance biosynthetic process;GO:0019538//protein metabolic process;GO:0043603//cellular amide metabo…
Unigene0027416	CYP19-3	PREDICTED: peptidyl-prolyl cis-trans isomerase CYP19-3 [Elaeis guineensis]	-	-	-	-
Unigene0027671	At5g55840	PPR domain-containing protein/PPR_1 domain-containing protein/PPR_2 domain-containing protein [Cephalotus follicularis]	-	-	-	-
Unigene0027673	At5g55840	PPR domain-containing protein/PPR_1 domain-containing protein/PPR_2 domain-containing protein [Cephalotus follicularis]	-	-	-	-
Unigene0027803	-	RRM_6 domain-containing protein [Cephalotus follicularis]	-	-	-	-
Unigene0027813	At4g19190	PREDICTED: uncharacterized zinc finger CCHC domain-containing protein At4g19190 [Elaeis guineensis]	-	-	GO:0005488//binding;GO:0046914//transition metal ion binding;GO:0043169//cation binding;GO:0043167//ion binding;GO:0046872//metal ion binding	-
Unigene0027827	RBL15	rhomboid protein Panut_RBL15, partial [Pandanus utilis]	-	-	-	-
Unigene0027911	GSH1	PREDICTED: glutamate--cysteine ligase, chloroplastic-like [Populus euphratica]	ko01100//Metabolic pathways//Global and Overview//Metabolism;ko00270//Cysteine and methionine metabolism//Amino acid metabolism//Metabolism;ko00480//Glutathione metabolism//Metabolism of other amino acids//Metabolism	-	GO:0003824//catalytic activity	GO:0006575//cellular modified amino acid metabolic process;GO:0006749//glutathione metabolic process;GO:0034641//cellular nitrogen compound metabolic process;GO:0006518//peptide metabolic process;GO:0043603//cellular amide metabolic process;GO:0008152//metabolic process;GO:0009987//cellular process;GO:1901564//organonitrogen compound metabolic process;GO:0006807//nitrogen compound metabolic proce…
Unigene0027912	GSH1	PREDICTED: glutamate--cysteine ligase, chloroplastic-like [Populus euphratica]	ko01100//Metabolic pathways//Global and Overview//Metabolism;ko00270//Cysteine and methionine metabolism//Amino acid metabolism//Metabolism;ko00480//Glutathione metabolism//Metabolism of other amino acids//Metabolism	-	GO:0003824//catalytic activity	GO:0006749//glutathione metabolic process;GO:1901564//organonitrogen compound metabolic process;GO:0044237//cellular metabolic process;GO:0006807//nitrogen compound metabolic process;GO:0043603//cellular amide metabolic process;GO:0009987//cellular process;GO:0006518//peptide metabolic process;GO:0006575//cellular modified amino acid metabolic process;GO:0006790//sulfur compound metabolic process…
Unigene0028020	BP-73	PREDICTED: rho-N domain-containing protein 1, chloroplastic [Nelumbo nucifera]	-	-	-	-
Unigene0028106	DIM	PREDICTED: delta(24)-sterol reductase [Nelumbo nucifera]	ko01100//Metabolic pathways//Global and Overview//Metabolism;ko01110//Biosynthesis of secondary metabolites//Global and Overview//Metabolism;ko00100//Steroid biosynthesis//Lipid metabolism//Metabolism	-	GO:0005488//binding;GO:0016614//oxidoreductase activity, acting on CH-OH group of donors;GO:0097159//organic cyclic compound binding;GO:1901363//heterocyclic compound binding;GO:0036094//small molecule binding;GO:0016616//oxidoreductase activity, acting on the CH-OH group of donors, NAD or NADP as acceptor;GO:1901265//nucleoside phosphate binding;GO:0003824//catalytic activity;GO:0016491//oxidore…	GO:0044710//single-organism metabolic process;GO:0044699//single-organism process;GO:0008152//metabolic process
Unigene0028121	-	PREDICTED: uncharacterized protein LOC100854825 [Vitis vinifera]	-	-	-	-
Unigene0028143	PEX11C	Peroxisomal membrane protein 11C [Morus notabilis]	-	-	-	GO:0007031//peroxisome organization;GO:0016043//cellular component organization;GO:0009987//cellular process;GO:0006996//organelle organization;GO:0071840//cellular component organization or biogenesis
Unigene0028321	-	PREDICTED: stress response protein nst1 [Vitis vinifera]	-	-	-	-
Unigene0028697	Dnajb4	PREDICTED: dnaJ homolog subfamily B member 1-like [Phoenix dactylifera]	-	-	GO:0005515//protein binding;GO:0005488//binding	GO:0050896//response to stimulus
Unigene0028800	CPK13	PREDICTED: calcium-dependent protein kinase 13 [Nelumbo nucifera]	ko04626//Plant-pathogen interaction//Environmental adaptation//Organismal Systems	GO:0016020//membrane	GO:0016773//phosphotransferase activity, alcohol group as acceptor;GO:0004672//protein kinase activity;GO:0036094//small molecule binding;GO:0001882//nucleoside binding;GO:0043169//cation binding;GO:0016301//kinase activity;GO:0016740//transferase activity;GO:0004674//protein serine/threonine kinase activity;GO:0032550//purine ribonucleoside binding;GO:0097367//carbohydrate derivative binding;GO:…	GO:0044267//cellular protein metabolic process;GO:0036211//protein modification process;GO:0006796//phosphate-containing compound metabolic process;GO:0019538//protein metabolic process;GO:0009987//cellular process;GO:0044260//cellular macromolecule metabolic process;GO:0044238//primary metabolic process;GO:0006468//protein phosphorylation;GO:0071704//organic substance metabolic process;GO:000646…
Unigene0029181	At4g17486	PREDICTED: desumoylating isopeptidase 2-like [Nelumbo nucifera]	-	-	-	-
Unigene0029724	ABI5	PREDICTED: protein ABSCISIC ACID-INSENSITIVE 5 [Amborella trichopoda]	ko04075//Plant hormone signal transduction//Signal transduction//Environmental Information Processing	-	GO:0003677//DNA binding;GO:0097159//organic cyclic compound binding;GO:0005488//binding;GO:1901363//heterocyclic compound binding;GO:0003676//nucleic acid binding	GO:0050896//response to stimulus;GO:0010468//regulation of gene expression;GO:0044763//single-organism cellular process;GO:0070887//cellular response to chemical stimulus;GO:0006950//response to stress;GO:0007154//cell communication;GO:0071310//cellular response to organic substance;GO:0050789//regulation of biological process;GO:0009719//response to endogenous stimulus;GO:0019222//regulation of …
Unigene0029946	GBP2	PREDICTED: guanylate-binding protein 1-like [Nelumbo nucifera]	-	-	-	-
Unigene0029947	GBP2	PREDICTED: guanylate-binding protein 1-like [Nelumbo nucifera]	-	GO:0043229//intracellular organelle;GO:0044464//cell part;GO:0043232//intracellular non-membrane-bounded organelle;GO:0009536//plastid;GO:0043227//membrane-bounded organelle;GO:0005623//cell;GO:0043226//organelle;GO:0044444//cytoplasmic part;GO:0005737//cytoplasm;GO:0044424//intracellular part;GO:0043228//non-membrane-bounded organelle;GO:0005622//intracellular;GO:0043231//intracellular membrane-…	GO:0036094//small molecule binding;GO:0017111//nucleoside-triphosphatase activity;GO:0097367//carbohydrate derivative binding;GO:0016462//pyrophosphatase activity;GO:0001883//purine nucleoside binding;GO:0016787//hydrolase activity;GO:0097159//organic cyclic compound binding;GO:0001882//nucleoside binding;GO:0016818//hydrolase activity, acting on acid anhydrides, in phosphorus-containing anhydrid…	GO:0009987//cellular process;GO:0007017//microtubule-based process;GO:1902410//mitotic cytokinetic process;GO:0000281//mitotic cytokinesis;GO:0007049//cell cycle;GO:0044763//single-organism cellular process;GO:0044699//single-organism process;GO:0022402//cell cycle process;GO:0051301//cell division;GO:0061640//cytoskeleton-dependent cytokinesis;GO:0000278//mitotic cell cycle;GO:1903047//mitotic c…
Unigene0029966	LEA14-A	late embryogenesis abundant protein [Tamarix hispida]	-	GO:0030054//cell junction;GO:0005622//intracellular;GO:0016020//membrane;GO:0005911//cell-cell junction;GO:0005623//cell;GO:0043226//organelle;GO:0044444//cytoplasmic part;GO:0043227//membrane-bounded organelle;GO:0044424//intracellular part;GO:0043229//intracellular organelle;GO:0044464//cell part;GO:0005737//cytoplasm;GO:0043231//intracellular membrane-bounded organelle	-	GO:0006807//nitrogen compound metabolic process;GO:0050896//response to stimulus;GO:0044249//cellular biosynthetic process;GO:0044283//small molecule biosynthetic process;GO:0044763//single-organism cellular process;GO:0044710//single-organism metabolic process;GO:0000097//sulfur amino acid biosynthetic process;GO:0044711//single-organism biosynthetic process;GO:0071704//organic substance metabol…
Unigene0029967	LEA14-A	late embryogenesis abundant protein [Tamarix hispida]	-	GO:0043231//intracellular membrane-bounded organelle;GO:0044444//cytoplasmic part;GO:0005623//cell;GO:0005622//intracellular;GO:0030054//cell junction;GO:0043226//organelle;GO:0005911//cell-cell junction;GO:0005737//cytoplasm;GO:0016020//membrane;GO:0044424//intracellular part;GO:0043227//membrane-bounded organelle;GO:0043229//intracellular organelle;GO:0044464//cell part	-	GO:0051234//establishment of localization;GO:1901576//organic substance biosynthetic process;GO:0006807//nitrogen compound metabolic process;GO:0001101//response to acid chemical;GO:0005975//carbohydrate metabolic process;GO:0006810//transport;GO:0019752//carboxylic acid metabolic process;GO:0006970//response to osmotic stress;GO:0009058//biosynthetic process;GO:0044237//cellular metabolic proces…
Unigene0029968	LEA14-A	late embryogenesis abundant protein [Tamarix hispida]	-	GO:0044444//cytoplasmic part;GO:0030054//cell junction;GO:0043229//intracellular organelle;GO:0043226//organelle;GO:0005622//intracellular;GO:0044464//cell part;GO:0005737//cytoplasm;GO:0016020//membrane;GO:0044424//intracellular part;GO:0005911//cell-cell junction;GO:0043227//membrane-bounded organelle;GO:0005623//cell;GO:0043231//intracellular membrane-bounded organelle	-	GO:0010035//response to inorganic substance;GO:0043436//oxoacid metabolic process;GO:1901576//organic substance biosynthetic process;GO:0019318//hexose metabolic process;GO:0044272//sulfur compound biosynthetic process;GO:1901566//organonitrogen compound biosynthetic process;GO:0006520//cellular amino acid metabolic process;GO:0005996//monosaccharide metabolic process;GO:0009058//biosynthetic pro…
Unigene0030110	-	putative HTH-type transcriptional regulator ykoM, partial [Anthurium amnicola]	-	-	-	-
Unigene0030272	AGPS1	AGPS1 [Gladiolus hybrid cultivar]	ko01100//Metabolic pathways//Global and Overview//Metabolism;ko01110//Biosynthesis of secondary metabolites//Global and Overview//Metabolism;ko00500//Starch and sucrose metabolism//Carbohydrate metabolism//Metabolism;ko00520//Amino sugar and nucleotide sugar metabolism//Carbohydrate metabolism//Metabolism	GO:0044444//cytoplasmic part;GO:0005622//intracellular;GO:0043229//intracellular organelle;GO:0043226//organelle;GO:0005737//cytoplasm;GO:0005623//cell;GO:0043227//membrane-bounded organelle;GO:0043231//intracellular membrane-bounded organelle;GO:0044424//intracellular part;GO:0044464//cell part;GO:0009536//plastid	GO:0016740//transferase activity;GO:0003824//catalytic activity;GO:0016779//nucleotidyltransferase activity;GO:0016772//transferase activity, transferring phosphorus-containing groups;GO:0070566//adenylyltransferase activity	GO:0015980//energy derivation by oxidation of organic compounds;GO:0005976//polysaccharide metabolic process;GO:0043170//macromolecule metabolic process;GO:0055114//oxidation-reduction process;GO:0006073//cellular glucan metabolic process;GO:0044723//single-organism carbohydrate metabolic process;GO:0006091//generation of precursor metabolites and energy;GO:0044260//cellular macromolecule metabol…
Unigene0030276	TOP1	PREDICTED: DNA topoisomerase 1 alpha-like [Nelumbo nucifera]	-	-	GO:0003916//DNA topoisomerase activity;GO:0016853//isomerase activity;GO:0003824//catalytic activity	-
Unigene0030277	TOP1	PREDICTED: DNA topoisomerase 1 alpha-like [Nelumbo nucifera]	-	-	-	-
Unigene0030325	bcsl1b	PREDICTED: AAA-ATPase At5g57480 [Nelumbo nucifera]	-	-	GO:0032550//purine ribonucleoside binding;GO:0001882//nucleoside binding;GO:0036094//small molecule binding;GO:0005488//binding;GO:0003824//catalytic activity;GO:0097159//organic cyclic compound binding;GO:0032549//ribonucleoside binding;GO:0097367//carbohydrate derivative binding;GO:1901363//heterocyclic compound binding;GO:0001883//purine nucleoside binding	GO:0043933//macromolecular complex subunit organization;GO:0017062//respiratory chain complex III assembly;GO:0071822//protein complex subunit organization;GO:0044085//cellular component biogenesis;GO:0071840//cellular component organization or biogenesis;GO:0043623//cellular protein complex assembly;GO:0022607//cellular component assembly;GO:0017004//cytochrome complex assembly;GO:0034622//cellu…
Unigene0030372	-	PREDICTED: histone H3.v1-like isoform X2 [Nelumbo nucifera]	-	-	-	-
Unigene0030373	-	PREDICTED: histone H3.v1-like isoform X2 [Nelumbo nucifera]	-	-	-	-
Unigene0030385	At1g06030	fructokinase [Actinidia chinensis]	ko01100//Metabolic pathways//Global and Overview//Metabolism;ko00500//Starch and sucrose metabolism//Carbohydrate metabolism//Metabolism;ko00520//Amino sugar and nucleotide sugar metabolism//Carbohydrate metabolism//Metabolism;ko00051//Fructose and mannose metabolism//Carbohydrate metabolism//Metabolism	-	-	-
Unigene0030445	CYP40	PREDICTED: peptidyl-prolyl cis-trans isomerase CYP40 [Nelumbo nucifera]	-	-	GO:0003824//catalytic activity;GO:0016859//cis-trans isomerase activity;GO:0016853//isomerase activity	GO:0071704//organic substance metabolic process;GO:0044267//cellular protein metabolic process;GO:0008152//metabolic process;GO:0019538//protein metabolic process;GO:0044237//cellular metabolic process;GO:0043170//macromolecule metabolic process;GO:0044260//cellular macromolecule metabolic process;GO:0009987//cellular process;GO:0044238//primary metabolic process
Unigene0030514	-	--	-	-	-	-
Unigene0030924	At5g65490	PREDICTED: protein ecdysoneless homolog [Nelumbo nucifera]	-	-	-	-
Unigene0031002	XCT	PREDICTED: protein XAP5 CIRCADIAN TIMEKEEPER isoform X2 [Nelumbo nucifera]	-	-	-	GO:0032502//developmental process;GO:0065008//regulation of biological quality;GO:0050793//regulation of developmental process;GO:0050794//regulation of cellular process;GO:0065007//biological regulation;GO:0044763//single-organism cellular process;GO:0050896//response to stimulus;GO:0009743//response to carbohydrate;GO:0010033//response to organic substance;GO:0009639//response to red or far red…
Unigene0031119	GSTF9	glutathione S-transferase [Chimonanthus praecox]	ko00480//Glutathione metabolism//Metabolism of other amino acids//Metabolism	-	GO:0003824//catalytic activity	-
Unigene0031282	RANBP1C	Ran-binding protein 1-b-like protein [Morus notabilis]	-	-	-	-
Unigene0031524	fabZ	(3R)-hydroxymyristoyl-[acyl-carrier-protein] dehydratase [Anthurium amnicola]	ko01100//Metabolic pathways//Global and Overview//Metabolism;ko01212//Fatty acid metabolism//Global and Overview//Metabolism;ko00061//Fatty acid biosynthesis//Lipid metabolism//Metabolism;ko00780//Biotin metabolism//Metabolism of cofactors and vitamins//Metabolism	-	-	-
Unigene0031593	GT-2	PREDICTED: trihelix transcription factor GTL1 isoform X1 [Nelumbo nucifera]	-	-	-	GO:0090304//nucleic acid metabolic process;GO:0008152//metabolic process;GO:0044238//primary metabolic process;GO:0034645//cellular macromolecule biosynthetic process;GO:0006807//nitrogen compound metabolic process;GO:0050794//regulation of cellular process;GO:0006139//nucleobase-containing compound metabolic process;GO:0065007//biological regulation;GO:0071704//organic substance metabolic proces…
Unigene0031594	-	--	-	-	-	-
Unigene0031702	-	Phox/Bem1p [Corchorus capsularis]	-	-	-	-
Unigene0031900	FIPS5	PREDICTED: FIP1[III]-like protein [Nelumbo nucifera]	ko03015//mRNA surveillance pathway//Translation//Genetic Information Processing	-	-	-
Unigene0031902	FIPS5	PREDICTED: FIP1[III]-like protein [Nelumbo nucifera]	ko03015//mRNA surveillance pathway//Translation//Genetic Information Processing	-	-	-
Unigene0031984	NAA16	PREDICTED: N-alpha-acetyltransferase 15, NatA auxiliary subunit isoform X1 [Vitis vinifera]	-	-	GO:0003824//catalytic activity	-
Unigene0031985	-	PREDICTED: N-alpha-acetyltransferase 16, NatA auxiliary subunit-like isoform X2 [Elaeis guineensis]	-	-	-	-
Unigene0032082	GA15091	PREDICTED: protein GDAP2 homolog [Phoenix dactylifera]	-	-	-	-
Unigene0032274	EML3	PREDICTED: protein EMSY-LIKE 3 isoform X1 [Nelumbo nucifera]	-	-	-	-
Unigene0032275	EML3	PREDICTED: protein EMSY-LIKE 3 isoform X3 [Nelumbo nucifera]	-	-	-	-
Unigene0032303	ERG	PREDICTED: GTP-binding protein ERG [Nelumbo nucifera]	-	-	-	-
Unigene0032576	Syncrip	PREDICTED: heterogeneous nuclear ribonucleoprotein R [Nelumbo nucifera]	-	-	GO:0097159//organic cyclic compound binding;GO:0005488//binding	-
Unigene0032640	CHLP	pyridine nucleotide-disulfide oxidoreductase family protein [Populus tomentosa]	ko01100//Metabolic pathways//Global and Overview//Metabolism;ko01110//Biosynthesis of secondary metabolites//Global and Overview//Metabolism;ko00900//Terpenoid backbone biosynthesis//Metabolism of terpenoids and polyketides//Metabolism;ko00860//Porphyrin and chlorophyll metabolism//Metabolism of cofactors and vitamins//Metabolism	-	GO:0016491//oxidoreductase activity;GO:0003824//catalytic activity;GO:0016627//oxidoreductase activity, acting on the CH-CH group of donors	GO:1901566//organonitrogen compound biosynthetic process;GO:0009058//biosynthetic process;GO:0071704//organic substance metabolic process;GO:0018130//heterocycle biosynthetic process;GO:0006779//porphyrin-containing compound biosynthetic process;GO:0051188//cofactor biosynthetic process;GO:1901564//organonitrogen compound metabolic process;GO:0046483//heterocycle metabolic process;GO:1901362//org…
Unigene0032657	APA1	PREDICTED: aspartic proteinase [Ricinus communis]	-	-	GO:0016787//hydrolase activity;GO:0003824//catalytic activity	GO:0043170//macromolecule metabolic process;GO:0071704//organic substance metabolic process;GO:0044238//primary metabolic process;GO:0008152//metabolic process;GO:0019538//protein metabolic process
Unigene0032750	GB1	PREDICTED: guanine nucleotide-binding protein subunit beta-like protein [Nelumbo nucifera]	-	-	-	-
Unigene0032823	TRDMT1	PREDICTED: tRNA (cytosine(38)-C(5))-methyltransferase isoform X1 [Nelumbo nucifera]	-	-	-	-
Unigene0032867	At5g14770	PREDICTED: pentatricopeptide repeat-containing protein At5g14770, mitochondrial [Phoenix dactylifera]	-	-	-	-
Unigene0032880	PCMP-H12	PREDICTED: pentatricopeptide repeat-containing protein At1g08070, chloroplastic-like [Nelumbo nucifera]	-	-	-	-
Unigene0033032	At1g79600	PREDICTED: uncharacterized aarF domain-containing protein kinase At1g79600, chloroplastic [Jatropha curcas]	-	-	GO:0005488//binding;GO:0001882//nucleoside binding;GO:0036094//small molecule binding;GO:0001883//purine nucleoside binding;GO:0097159//organic cyclic compound binding;GO:1901363//heterocyclic compound binding;GO:0097367//carbohydrate derivative binding;GO:0016740//transferase activity;GO:0032550//purine ribonucleoside binding;GO:0003824//catalytic activity;GO:0032549//ribonucleoside binding	GO:0044237//cellular metabolic process;GO:0043170//macromolecule metabolic process;GO:0036211//protein modification process;GO:0006464//cellular protein modification process;GO:0008152//metabolic process;GO:0044267//cellular protein metabolic process;GO:0044238//primary metabolic process;GO:0071704//organic substance metabolic process;GO:0009987//cellular process;GO:0043412//macromolecule modific…
Unigene0033034	At1g79600	PREDICTED: uncharacterized aarF domain-containing protein kinase At1g79600, chloroplastic isoform X1 [Populus euphratica]	-	-	GO:0036094//small molecule binding;GO:0032550//purine ribonucleoside binding;GO:0097367//carbohydrate derivative binding;GO:0001883//purine nucleoside binding;GO:0005488//binding;GO:0001882//nucleoside binding;GO:1901363//heterocyclic compound binding;GO:0097159//organic cyclic compound binding;GO:0016740//transferase activity;GO:0032549//ribonucleoside binding;GO:0003824//catalytic activity	GO:0009987//cellular process;GO:0006464//cellular protein modification process;GO:0008152//metabolic process;GO:0044237//cellular metabolic process;GO:0044267//cellular protein metabolic process;GO:0036211//protein modification process;GO:0043170//macromolecule metabolic process;GO:0071704//organic substance metabolic process;GO:0044238//primary metabolic process;GO:0019538//protein metabolic pro…
Unigene0033100	SKIP	PREDICTED: SNW/SKI-interacting protein-like [Nelumbo nucifera]	ko03040//Spliceosome//Transcription//Genetic Information Processing	GO:0005622//intracellular;GO:1990904//ribonucleoprotein complex;GO:0032991//macromolecular complex;GO:0044464//cell part;GO:0030529//intracellular ribonucleoprotein complex;GO:0005623//cell;GO:0044424//intracellular part	-	-
Unigene0033109	PPA4	PREDICTED: soluble inorganic pyrophosphatase 4-like [Phoenix dactylifera]	ko00190//Oxidative phosphorylation//Energy metabolism//Metabolism	-	-	-
Unigene0033143	At4g28440	PREDICTED: uncharacterized protein At4g28440 [Nelumbo nucifera]	ko03030//DNA replication//Replication and repair//Genetic Information Processing;ko03420//Nucleotide excision repair//Replication and repair//Genetic Information Processing;ko03440//Homologous recombination//Replication and repair//Genetic Information Processing;ko03430//Mismatch repair//Replication and repair//Genetic Information Processing	-	-	-
Unigene0033201	UGT78D2	UDP-glucosyl transferase 78D2 [Arabidopsis thaliana]	ko01100//Metabolic pathways//Global and Overview//Metabolism;ko01110//Biosynthesis of secondary metabolites//Global and Overview//Metabolism;ko00942//Anthocyanin biosynthesis//Biosynthesis of other secondary metabolites//Metabolism	-	GO:0016740//transferase activity;GO:0046527//glucosyltransferase activity;GO:0035251//UDP-glucosyltransferase activity;GO:0016758//transferase activity, transferring hexosyl groups;GO:0003824//catalytic activity;GO:0008194//UDP-glycosyltransferase activity;GO:0016757//transferase activity, transferring glycosyl groups	GO:0071704//organic substance metabolic process;GO:0009314//response to radiation;GO:0009628//response to abiotic stimulus;GO:0009058//biosynthetic process;GO:0050896//response to stimulus;GO:0009411//response to UV;GO:0009416//response to light stimulus;GO:0034285//response to disaccharide;GO:0042221//response to chemical;GO:1901576//organic substance biosynthetic process;GO:0010033//response to…
Unigene0033205	RAF2	PREDICTED: rubisco accumulation factor 1, chloroplastic [Juglans regia]	-	-	-	-
Unigene0033257	Ccdc97	PREDICTED: YTH domain-containing protein 1 [Cucumis sativus]	-	-	-	-
Unigene0033362	At4g37250	PREDICTED: probable LRR receptor-like serine/threonine-protein kinase At4g37250 [Nelumbo nucifera]	-	-	-	-
Unigene0033406	ACCB-1	biotin carboxyl carrier protein [Persea americana]	ko01100//Metabolic pathways//Global and Overview//Metabolism;ko01110//Biosynthesis of secondary metabolites//Global and Overview//Metabolism;ko01130//Biosynthesis of antibiotics//Global and Overview//Metabolism;ko01120//Microbial metabolism in diverse environments//Global and Overview//Metabolism;ko01200//Carbon metabolism//Global and Overview//Metabolism;ko00620//Pyruvate metabolism//Carbohydrat…	-	-	-
Unigene0033453	ARALYDRAFT_321547	PREDICTED: CASP-like protein 4B1 [Citrus sinensis]	-	GO:0016020//membrane;GO:0031224//intrinsic component of membrane;GO:0044425//membrane part	-	-
Unigene0033479	-	Actin-related protein 8, partial [Anthurium amnicola]	-	-	-	-
Unigene0033480	-	Actin-related protein 8, partial [Anthurium amnicola]	-	-	-	-
Unigene0033481	-	Actin-related protein 8, partial [Anthurium amnicola]	-	-	-	-
Unigene0033576	OST3B	PREDICTED: probable dolichyl-diphosphooligosaccharide--protein glycosyltransferase subunit 3B [Nelumbo nucifera]	ko01100//Metabolic pathways//Global and Overview//Metabolism;ko04141//Protein processing in endoplasmic reticulum//Folding, sorting and degradation//Genetic Information Processing;ko00510//N-Glycan biosynthesis//Glycan biosynthesis and metabolism//Metabolism	-	-	-
Unigene0033674	RH10	PREDICTED: DEAD-box ATP-dependent RNA helicase 10 [Cucumis melo]	-	-	-	-
Unigene0033676	RH10	PREDICTED: DEAD-box ATP-dependent RNA helicase 10 [Cucumis melo]	-	-	-	-
Unigene0033833	HSL1	PREDICTED: receptor-like protein kinase HSL1 [Nicotiana tomentosiformis]	-	-	GO:0003824//catalytic activity;GO:0016740//transferase activity	-
Unigene0033834	HSL1	PREDICTED: receptor-like protein kinase HSL1 [Nelumbo nucifera]	-	-	-	-
Unigene0033858	WRKY11	PREDICTED: probable WRKY transcription factor 17 [Nelumbo nucifera]	-	-	GO:1901363//heterocyclic compound binding;GO:0003677//DNA binding;GO:0097159//organic cyclic compound binding;GO:0003676//nucleic acid binding;GO:0005488//binding	GO:0019222//regulation of metabolic process;GO:0065007//biological regulation;GO:0060255//regulation of macromolecule metabolic process;GO:0050789//regulation of biological process;GO:0010468//regulation of gene expression
Unigene0033896	PCMP-H11	PREDICTED: pentatricopeptide repeat-containing protein At1g31920 [Nelumbo nucifera]	-	-	-	GO:2000026//regulation of multicellular organismal development;GO:0016070//RNA metabolic process;GO:0006139//nucleobase-containing compound metabolic process;GO:0044260//cellular macromolecule metabolic process;GO:0008152//metabolic process;GO:0048509//regulation of meristem development;GO:0050793//regulation of developmental process;GO:0034641//cellular nitrogen compound metabolic process;GO:190…
Unigene0033935	TT12	PREDICTED: protein DETOXIFICATION 35 [Nelumbo nucifera]	-	GO:0044425//membrane part;GO:0031224//intrinsic component of membrane;GO:0016020//membrane	GO:0015291//secondary active transmembrane transporter activity;GO:0022857//transmembrane transporter activity;GO:0005215//transporter activity;GO:0022804//active transmembrane transporter activity	GO:0006928//movement of cell or subcellular component;GO:0000902//cell morphogenesis;GO:0048468//cell development;GO:0032502//developmental process;GO:0044699//single-organism process;GO:0071840//cellular component organization or biogenesis;GO:0048869//cellular developmental process;GO:0009987//cellular process;GO:0030154//cell differentiation;GO:0000904//cell morphogenesis involved in different…
Unigene0033936	TT12	PREDICTED: protein DETOXIFICATION 35 [Nelumbo nucifera]	-	GO:0044425//membrane part;GO:0016020//membrane;GO:0031224//intrinsic component of membrane	GO:0005215//transporter activity;GO:0015291//secondary active transmembrane transporter activity;GO:0022804//active transmembrane transporter activity;GO:0022857//transmembrane transporter activity	GO:0009653//anatomical structure morphogenesis;GO:0030154//cell differentiation;GO:0000902//cell morphogenesis;GO:0048869//cellular developmental process;GO:0048468//cell development;GO:0006928//movement of cell or subcellular component;GO:0016043//cellular component organization;GO:0044767//single-organism developmental process;GO:0000904//cell morphogenesis involved in differentiation;GO:000998…
Unigene0034001	ABCF1	PREDICTED: ABC transporter F family member 1-like [Nelumbo nucifera]	-	-	GO:0097159//organic cyclic compound binding;GO:0097367//carbohydrate derivative binding;GO:0016817//hydrolase activity, acting on acid anhydrides;GO:1901363//heterocyclic compound binding;GO:0016462//pyrophosphatase activity;GO:0017111//nucleoside-triphosphatase activity;GO:0036094//small molecule binding;GO:0001882//nucleoside binding;GO:0032549//ribonucleoside binding;GO:0032550//purine ribonuc…	-
Unigene0034130	CURT1A	PREDICTED: protein CURVATURE THYLAKOID 1A, chloroplastic-like [Populus euphratica]	-	-	-	-
Unigene0034188	PATL4	PREDICTED: patellin-4 [Vitis vinifera]	-	-	-	-
Unigene0034485	HAT5	PREDICTED: homeobox-leucine zipper protein HAT5 [Nelumbo nucifera]	-	-	-	GO:0010467//gene expression;GO:0044249//cellular biosynthetic process;GO:0044237//cellular metabolic process;GO:0008152//metabolic process;GO:0034645//cellular macromolecule biosynthetic process;GO:0044260//cellular macromolecule metabolic process;GO:0009059//macromolecule biosynthetic process;GO:0071704//organic substance metabolic process;GO:1901576//organic substance biosynthetic process;GO:00…
Unigene0034621	At5g49610	PREDICTED: F-box protein At5g49610 [Nelumbo nucifera]	-	-	-	-
Unigene0034659	-	--	-	-	-	-
Unigene0034812	NHX3	PREDICTED: sodium/hydrogen exchanger 2-like [Phoenix dactylifera]	-	-	-	-
Unigene0035326	AAP2	PREDICTED: amino acid permease 3 [Nelumbo nucifera]	-	GO:0016020//membrane;GO:0044425//membrane part;GO:0031224//intrinsic component of membrane	-	-
Unigene0035473	DTC	PREDICTED: mitochondrial dicarboxylate/tricarboxylate transporter DTC [Pyrus x bretschneideri]	-	GO:0044425//membrane part;GO:0016020//membrane;GO:0031224//intrinsic component of membrane	-	-
Unigene0035647	RHD3	PREDICTED: protein ROOT HAIR DEFECTIVE 3 [Elaeis guineensis]	-	GO:0005622//intracellular;GO:0031090//organelle membrane;GO:0005623//cell;GO:0044422//organelle part;GO:0044464//cell part;GO:0031224//intrinsic component of membrane;GO:0043231//intracellular membrane-bounded organelle;GO:0016020//membrane;GO:0044425//membrane part;GO:0043226//organelle;GO:0043227//membrane-bounded organelle;GO:0043229//intracellular organelle;GO:0044424//intracellular part	GO:0016818//hydrolase activity, acting on acid anhydrides, in phosphorus-containing anhydrides;GO:0001882//nucleoside binding;GO:0032550//purine ribonucleoside binding;GO:0003824//catalytic activity;GO:0032549//ribonucleoside binding;GO:1901363//heterocyclic compound binding;GO:0016817//hydrolase activity, acting on acid anhydrides;GO:0016462//pyrophosphatase activity;GO:0017111//nucleoside-triph…	-
Unigene0035841	HT1	PREDICTED: serine/threonine-protein kinase HT1-like isoform X2 [Nelumbo nucifera]	-	-	-	-
Unigene0035842	-	PREDICTED: serine/threonine-protein kinase HT1-like [Juglans regia]	-	-	-	-
Unigene0035902	SUVH5	PREDICTED: LOW QUALITY PROTEIN: histone-lysine N-methyltransferase, H3 lysine-9 specific SUVH5-like [Nelumbo nucifera]	ko00310//Lysine degradation//Amino acid metabolism//Metabolism	-	GO:0003824//catalytic activity;GO:0016741//transferase activity, transferring one-carbon groups;GO:0005488//binding;GO:0016740//transferase activity;GO:0008168//methyltransferase activity	GO:0036211//protein modification process;GO:0043414//macromolecule methylation;GO:0016571//histone methylation;GO:0016569//covalent chromatin modification;GO:0016043//cellular component organization;GO:0019538//protein metabolic process;GO:0044237//cellular metabolic process;GO:0008152//metabolic process;GO:0043412//macromolecule modification;GO:0044260//cellular macromolecule metabolic process;G…
Unigene0035903	SUVH5	PREDICTED: LOW QUALITY PROTEIN: histone-lysine N-methyltransferase, H3 lysine-9 specific SUVH5-like [Nelumbo nucifera]	ko00310//Lysine degradation//Amino acid metabolism//Metabolism	-	GO:0008168//methyltransferase activity;GO:0005488//binding;GO:0003824//catalytic activity;GO:0016740//transferase activity;GO:0016741//transferase activity, transferring one-carbon groups	GO:0006996//organelle organization;GO:0032259//methylation;GO:0044260//cellular macromolecule metabolic process;GO:0051276//chromosome organization;GO:0008213//protein alkylation;GO:1902589//single-organism organelle organization;GO:0016569//covalent chromatin modification;GO:0019538//protein metabolic process;GO:0036211//protein modification process;GO:0006464//cellular protein modification proc…
Unigene0036036	-	PREDICTED: uncharacterized protein LOC103718491 [Phoenix dactylifera]	-	-	-	-
Unigene0036037	-	expressed protein [Oryza sativa Japonica Group]	-	-	-	-
Unigene0036057	DOT4	PREDICTED: pentatricopeptide repeat-containing protein At2g13600 [Amborella trichopoda]	-	-	-	-
Unigene0036078	MBF1B	PREDICTED: multiprotein-bridging factor 1b [Amborella trichopoda]	-	-	GO:1901363//heterocyclic compound binding;GO:0097159//organic cyclic compound binding;GO:0005488//binding;GO:0003677//DNA binding;GO:0003676//nucleic acid binding	-
Unigene0036157	-	titin homolog [Asparagus officinalis]	-	-	-	-
Unigene0036160	MYB305	PREDICTED: myb-related protein 305 [Erythranthe guttata]	-	-	-	-
Unigene0036269	ASIL2	PREDICTED: trihelix transcription factor ASIL2 [Nelumbo nucifera]	-	-	-	-
Unigene0036270	ASIL2	PREDICTED: trihelix transcription factor ASIL2 [Nelumbo nucifera]	-	-	-	-
Unigene0036495	MYB44	PREDICTED: transcription factor MYB44-like [Populus euphratica]	-	-	-	-
Unigene0036496	-	hypothetical protein L484_009299 [Morus notabilis]	-	-	-	-
Unigene0036497	-	hypothetical protein L484_009299 [Morus notabilis]	-	-	-	-
Unigene0036633	frr	RRF domain-containing protein [Cephalotus follicularis]	-	-	-	-
Unigene0036729	RABB1C	PREDICTED: ras-related protein RABB1c isoform X1 [Amborella trichopoda]	-	GO:0043231//intracellular membrane-bounded organelle;GO:0044464//cell part;GO:0043227//membrane-bounded organelle;GO:0005622//intracellular;GO:0044424//intracellular part;GO:0005623//cell;GO:0043226//organelle;GO:0043229//intracellular organelle;GO:0016020//membrane	GO:0032549//ribonucleoside binding;GO:0001883//purine nucleoside binding;GO:0036094//small molecule binding;GO:0001882//nucleoside binding;GO:0032550//purine ribonucleoside binding;GO:0097159//organic cyclic compound binding;GO:1901363//heterocyclic compound binding;GO:0097367//carbohydrate derivative binding;GO:0005488//binding	GO:0048856//anatomical structure development;GO:0045184//establishment of protein localization;GO:0008104//protein localization;GO:0016192//vesicle-mediated transport;GO:0061024//membrane organization;GO:0034613//cellular protein localization;GO:0033036//macromolecule localization;GO:0051234//establishment of localization;GO:1902582//single-organism intracellular transport;GO:0006886//intracellul…
Unigene0036817	Os07g0103200	PREDICTED: DDRGK domain-containing protein 1 [Vitis vinifera]	-	-	-	-
Unigene0037165	Os08g0159800	PREDICTED: zinc finger CCCH domain-containing protein 56 [Nelumbo nucifera]	-	-	-	-
Unigene0037166	Os08g0159800	PREDICTED: zinc finger CCCH domain-containing protein 56 [Nelumbo nucifera]	-	-	-	-
Unigene0037265	Ccdc12	PREDICTED: coiled-coil domain-containing protein 12 isoform X1 [Nelumbo nucifera]	ko03040//Spliceosome//Transcription//Genetic Information Processing	-	-	-
Unigene0037266	PSY1	PREDICTED: coiled-coil domain-containing protein 12 isoform X1 [Nelumbo nucifera]	ko03040//Spliceosome//Transcription//Genetic Information Processing	-	-	-
Unigene0037499	WRKY4	PREDICTED: probable WRKY transcription factor 4 isoform X1 [Phoenix dactylifera]	-	-	-	-
Unigene0037500	WRKY4	PREDICTED: probable WRKY transcription factor 4 isoform X1 [Phoenix dactylifera]	-	-	-	-
Unigene0037582	-	PREDICTED: neurofilament light polypeptide-like [Gossypium hirsutum]	-	-	-	-
Unigene0037800	-	PREDICTED: uncharacterized protein LOC101260358 [Solanum lycopersicum]	-	-	-	-
Unigene0038177	CS	PREDICTED: citrate synthase, mitochondrial [Jatropha curcas]	ko01100//Metabolic pathways//Global and Overview//Metabolism;ko01110//Biosynthesis of secondary metabolites//Global and Overview//Metabolism;ko01130//Biosynthesis of antibiotics//Global and Overview//Metabolism;ko01120//Microbial metabolism in diverse environments//Global and Overview//Metabolism;ko01200//Carbon metabolism//Global and Overview//Metabolism;ko01230//Biosynthesis of amino acids//Glo…	-	GO:0003824//catalytic activity;GO:0016746//transferase activity, transferring acyl groups;GO:0016740//transferase activity	GO:0009987//cellular process;GO:0044699//single-organism process;GO:0019752//carboxylic acid metabolic process;GO:0006082//organic acid metabolic process;GO:0072350//tricarboxylic acid metabolic process;GO:0044763//single-organism cellular process;GO:0044237//cellular metabolic process;GO:0008152//metabolic process;GO:0006101//citrate metabolic process;GO:0044281//small molecule metabolic process…
Unigene0038182	HMGB7	High mobility group B protein 7 [Anthurium amnicola]	ko03410//Base excision repair//Replication and repair//Genetic Information Processing	GO:0005622//intracellular;GO:0043226//organelle;GO:0043229//intracellular organelle;GO:0043231//intracellular membrane-bounded organelle;GO:0005623//cell;GO:0044464//cell part;GO:0044424//intracellular part;GO:0043227//membrane-bounded organelle	GO:0001071//nucleic acid binding transcription factor activity	GO:0006139//nucleobase-containing compound metabolic process;GO:0065007//biological regulation;GO:0043170//macromolecule metabolic process;GO:0044237//cellular metabolic process;GO:0008152//metabolic process;GO:0006260//DNA replication;GO:0009987//cellular process;GO:0071704//organic substance metabolic process;GO:0006259//DNA metabolic process;GO:0009058//biosynthetic process;GO:0090304//nucleic…
Unigene0038288	Zmynd15	PREDICTED: zinc finger MYND domain-containing protein 15 isoform X2 [Nelumbo nucifera]	-	-	-	-
Unigene0038322	-	PREDICTED: ABC transporter F family member 4-like [Daucus carota subsp. sativus] [Daucus carota]	-	-	-	-
Unigene0038383	FRS5	PREDICTED: protein FAR1-RELATED SEQUENCE 5 [Amborella trichopoda]	-	-	-	-
Unigene0038384	FRS5	PREDICTED: protein FAR1-RELATED SEQUENCE 7 [Beta vulgaris subsp. vulgaris] [Beta vulgaris]	-	-	-	-
Unigene0038447	UNE12	Os07g0182200 [Oryza sativa Japonica Group]	-	-	-	-
Unigene0038448	UNE12	PREDICTED: transcription factor UNE12 isoform X3 [Nelumbo nucifera]	-	-	-	-
Unigene0038614	MBD9	PREDICTED: methyl-CpG-binding domain-containing protein 9 [Nelumbo nucifera]	-	-	-	GO:0044238//primary metabolic process;GO:0048731//system development;GO:0043170//macromolecule metabolic process;GO:0009987//cellular process;GO:0071840//cellular component organization or biogenesis;GO:0008152//metabolic process;GO:0044767//single-organism developmental process;GO:0044707//single-multicellular organism process;GO:0048856//anatomical structure development;GO:0016043//cellular com…
Unigene0038637	-	PREDICTED: myosin heavy chain, striated muscle [Vitis vinifera]	-	-	-	-
Unigene0038657	At3g46870	Pentatricopeptide repeat-containing protein At3g46870, partial [Anthurium amnicola]	-	-	-	-
Unigene0038713	At5g01610	DUF538 domain-containing protein [Cephalotus follicularis]	-	-	-	-
Unigene0038777	WRKY65	PREDICTED: probable WRKY transcription factor 65 [Vitis vinifera]	-	-	-	-
Unigene0038780	SF3B2	PREDICTED: splicing factor 3B subunit 2-like [Nelumbo nucifera]	ko03040//Spliceosome//Transcription//Genetic Information Processing	-	-	-
Unigene0038781	SF3B2	PREDICTED: splicing factor 3B subunit 2-like [Nelumbo nucifera]	ko03040//Spliceosome//Transcription//Genetic Information Processing	-	-	-
Unigene0038803	NET3C	PREDICTED: protein NETWORKED 3C [Nelumbo nucifera]	-	-	-	-
Unigene0038922	At4g12780	PREDICTED: auxilin-related protein 2-like [Brachypodium distachyon]	-	-	-	-
Unigene0038940	-	PREDICTED: uncharacterized protein LOC100260704 isoform X2 [Vitis vinifera]	-	-	-	-
Unigene0038941	MBD8	Zinc finger, C2H2-like protein [Corchorus capsularis]	-	-	-	-
Unigene0039047	At5g06830	PREDICTED: CDK5RAP3-like protein [Phoenix dactylifera]	-	-	-	-
Unigene0039048	At5g06830	PREDICTED: CDK5RAP3-like protein [Nelumbo nucifera]	-	-	-	-
Unigene0039120	GCR1	G-protein coupled receptor 1, partial [Chimonanthus praecox]	-	GO:0044459//plasma membrane part;GO:0044425//membrane part;GO:0016020//membrane;GO:0005622//intracellular;GO:0044424//intracellular part;GO:0044422//organelle part;GO:0031224//intrinsic component of membrane;GO:0044464//cell part;GO:0043231//intracellular membrane-bounded organelle;GO:0031226//intrinsic component of plasma membrane;GO:0031090//organelle membrane;GO:0005887//integral component of …	GO:0004888//transmembrane signaling receptor activity;GO:0004871//signal transducer activity;GO:0060089//molecular transducer activity;GO:0099600//transmembrane receptor activity;GO:0038023//signaling receptor activity;GO:0004872//receptor activity	GO:0032870//cellular response to hormone stimulus;GO:0032502//developmental process;GO:0010431//seed maturation;GO:0044702//single organism reproductive process;GO:1901360//organic cyclic compound metabolic process;GO:0071383//cellular response to steroid hormone stimulus;GO:0000003//reproduction;GO:0009072//aromatic amino acid family metabolic process;GO:0010033//response to organic substance;GO…
Unigene0039160	PMSR	methionine sulfoxide reductase A [Carica papaya]	-	GO:0009532//plastid stroma;GO:0009526//plastid envelope;GO:0044446//intracellular organelle part;GO:0043231//intracellular membrane-bounded organelle;GO:0044444//cytoplasmic part;GO:0044435//plastid part;GO:0043229//intracellular organelle;GO:0009536//plastid;GO:0005737//cytoplasm;GO:0044464//cell part;GO:0043226//organelle;GO:0044422//organelle part;GO:0044424//intracellular part;GO:0005623//cel…	GO:0016671//oxidoreductase activity, acting on a sulfur group of donors, disulfide as acceptor;GO:0016491//oxidoreductase activity;GO:0003824//catalytic activity;GO:0016667//oxidoreductase activity, acting on a sulfur group of donors	GO:0044281//small molecule metabolic process;GO:0006807//nitrogen compound metabolic process;GO:0006544//glycine metabolic process;GO:0043436//oxoacid metabolic process;GO:0006950//response to stress;GO:0008152//metabolic process;GO:0009987//cellular process;GO:0044699//single-organism process;GO:0050896//response to stimulus;GO:0044238//primary metabolic process;GO:0006520//cellular amino acid m…
Unigene0039173	MYOB3	PREDICTED: myosin-binding protein 2 [Nelumbo nucifera]	-	-	-	-
Unigene0039380	-	PREDICTED: myotubularin-related protein DDB_G0290005-like [Gossypium hirsutum]	-	-	-	-
Unigene0039406	-	--	-	-	-	-
Unigene0039531	HIPP26	PREDICTED: protein qua-1-like [Nelumbo nucifera]	-	GO:0071944//cell periphery;GO:0044464//cell part;GO:0030312//external encapsulating structure;GO:0005623//cell	GO:0005488//binding;GO:0043169//cation binding;GO:0043167//ion binding	GO:1902578//single-organism localization;GO:0044699//single-organism process;GO:0006811//ion transport;GO:0044765//single-organism transport;GO:0051234//establishment of localization;GO:0006812//cation transport;GO:0006810//transport;GO:0051179//localization
Unigene0039533	-	PREDICTED: protein qua-1-like [Nelumbo nucifera]	-	-	GO:0005488//binding;GO:0043167//ion binding;GO:0043169//cation binding	-
Unigene0039558	RPB2	PREDICTED: DNA-directed RNA polymerase II subunit RPB2 [Nelumbo nucifera]	ko01100//Metabolic pathways//Global and Overview//Metabolism;ko00230//Purine metabolism//Nucleotide metabolism//Metabolism;ko00240//Pyrimidine metabolism//Nucleotide metabolism//Metabolism;ko03020//RNA polymerase//Transcription//Genetic Information Processing	-	GO:0097159//organic cyclic compound binding;GO:1901363//heterocyclic compound binding;GO:0016779//nucleotidyltransferase activity;GO:0016740//transferase activity;GO:0097367//carbohydrate derivative binding;GO:0034062//RNA polymerase activity;GO:0016772//transferase activity, transferring phosphorus-containing groups;GO:0005488//binding;GO:0036094//small molecule binding;GO:0003824//catalytic act…	GO:0071704//organic substance metabolic process;GO:0044260//cellular macromolecule metabolic process;GO:0009987//cellular process;GO:0043170//macromolecule metabolic process;GO:0009059//macromolecule biosynthetic process;GO:0008152//metabolic process;GO:1901576//organic substance biosynthetic process;GO:0034645//cellular macromolecule biosynthetic process;GO:0044249//cellular biosynthetic process…
Unigene0039560	RPB2	PREDICTED: DNA-directed RNA polymerase II subunit RPB2 [Nelumbo nucifera]	ko01100//Metabolic pathways//Global and Overview//Metabolism;ko00230//Purine metabolism//Nucleotide metabolism//Metabolism;ko00240//Pyrimidine metabolism//Nucleotide metabolism//Metabolism;ko03020//RNA polymerase//Transcription//Genetic Information Processing	GO:0044464//cell part;GO:0030054//cell junction;GO:0005634//nucleus;GO:0005911//cell-cell junction;GO:0044444//cytoplasmic part;GO:0044451//nucleoplasm part;GO:0043231//intracellular membrane-bounded organelle;GO:0044428//nuclear part;GO:0005622//intracellular;GO:0044422//organelle part;GO:0043233//organelle lumen;GO:0031981//nuclear lumen;GO:0070013//intracellular organelle lumen;GO:0005737//cyt…	GO:0097159//organic cyclic compound binding;GO:0005488//binding;GO:0034062//RNA polymerase activity;GO:0036094//small molecule binding;GO:1901363//heterocyclic compound binding;GO:0043167//ion binding;GO:0001882//nucleoside binding;GO:0003676//nucleic acid binding;GO:0003824//catalytic activity;GO:0043169//cation binding;GO:0016772//transferase activity, transferring phosphorus-containing groups;…	GO:1901360//organic cyclic compound metabolic process;GO:1901362//organic cyclic compound biosynthetic process;GO:0046700//heterocycle catabolic process;GO:0006725//cellular aromatic compound metabolic process;GO:0008152//metabolic process;GO:0034654//nucleobase-containing compound biosynthetic process;GO:0044249//cellular biosynthetic process;GO:0019439//aromatic compound catabolic process;GO:00…
Unigene0039655	CYP26-2	PREDICTED: peptidyl-prolyl cis-trans isomerase CYP26-2, chloroplastic [Elaeis guineensis]	-	-	-	-
Unigene0039685	At4g17486	PREDICTED: deSI-like protein At4g17486 [Vitis vinifera]	-	-	-	-
Unigene0039783	CYP19-4	PREDICTED: peptidyl-prolyl cis-trans isomerase CYP20-1 [Nicotiana sylvestris]	-	-	-	-
Unigene0039784	CYP19-4	PREDICTED: peptidyl-prolyl cis-trans isomerase CYP20-1-like isoform X3 [Nelumbo nucifera]	-	-	-	-
Unigene0039829	MPK3	PREDICTED: mitogen-activated protein kinase 4 isoform X1 [Phoenix dactylifera]	-	-	GO:0004672//protein kinase activity;GO:0001882//nucleoside binding;GO:0005488//binding;GO:0016773//phosphotransferase activity, alcohol group as acceptor;GO:0016740//transferase activity;GO:1901363//heterocyclic compound binding;GO:0097159//organic cyclic compound binding;GO:0004702//receptor signaling protein serine/threonine kinase activity;GO:0001883//purine nucleoside binding;GO:0016772//tran…	GO:0044237//cellular metabolic process;GO:0043170//macromolecule metabolic process;GO:0006796//phosphate-containing compound metabolic process;GO:0009987//cellular process;GO:0071704//organic substance metabolic process;GO:0008152//metabolic process;GO:0006464//cellular protein modification process;GO:0044267//cellular protein metabolic process;GO:0044238//primary metabolic process;GO:0006793//ph…
Unigene0039832	lsm12a	PREDICTED: protein LSM12 homolog A [Nelumbo nucifera]	-	-	-	-
Unigene0039985	At5g13110	PREDICTED: glucose-6-phosphate 1-dehydrogenase, chloroplastic [Elaeis guineensis]	ko01100//Metabolic pathways//Global and Overview//Metabolism;ko01110//Biosynthesis of secondary metabolites//Global and Overview//Metabolism;ko01130//Biosynthesis of antibiotics//Global and Overview//Metabolism;ko01120//Microbial metabolism in diverse environments//Global and Overview//Metabolism;ko01200//Carbon metabolism//Global and Overview//Metabolism;ko00480//Glutathione metabolism//Metaboli…	-	GO:0003824//catalytic activity;GO:0005488//binding;GO:0097159//organic cyclic compound binding;GO:0000166//nucleotide binding;GO:1901363//heterocyclic compound binding;GO:0036094//small molecule binding;GO:1901265//nucleoside phosphate binding	GO:0071704//organic substance metabolic process;GO:0008152//metabolic process;GO:0044699//single-organism process;GO:0019318//hexose metabolic process;GO:0044710//single-organism metabolic process;GO:0044723//single-organism carbohydrate metabolic process;GO:0044281//small molecule metabolic process;GO:0005975//carbohydrate metabolic process;GO:0005996//monosaccharide metabolic process;GO:0044238…
Unigene0039987	At5g13110	PREDICTED: glucose-6-phosphate 1-dehydrogenase, chloroplastic [Elaeis guineensis]	ko01100//Metabolic pathways//Global and Overview//Metabolism;ko01110//Biosynthesis of secondary metabolites//Global and Overview//Metabolism;ko01130//Biosynthesis of antibiotics//Global and Overview//Metabolism;ko01120//Microbial metabolism in diverse environments//Global and Overview//Metabolism;ko01200//Carbon metabolism//Global and Overview//Metabolism;ko00480//Glutathione metabolism//Metaboli…	-	GO:0000166//nucleotide binding;GO:1901363//heterocyclic compound binding;GO:0005488//binding;GO:0003824//catalytic activity;GO:0036094//small molecule binding;GO:0097159//organic cyclic compound binding;GO:1901265//nucleoside phosphate binding	GO:0044723//single-organism carbohydrate metabolic process;GO:0044281//small molecule metabolic process;GO:0005975//carbohydrate metabolic process;GO:0044699//single-organism process;GO:0005996//monosaccharide metabolic process;GO:0019318//hexose metabolic process;GO:0008152//metabolic process;GO:0044710//single-organism metabolic process;GO:0071704//organic substance metabolic process;GO:0044238…
Unigene0040150	At4g10320	PREDICTED: isoleucine--tRNA ligase, cytoplasmic-like isoform X1 [Phoenix dactylifera]	ko00970//Aminoacyl-tRNA biosynthesis//Translation//Genetic Information Processing	-	-	-
Unigene0040237	LAG2	PREDICTED: LAG1 longevity assurance homolog 2-like [Nelumbo nucifera]	ko01100//Metabolic pathways//Global and Overview//Metabolism;ko00600//Sphingolipid metabolism//Lipid metabolism//Metabolism	GO:0044424//intracellular part;GO:0044425//membrane part;GO:0043226//organelle;GO:0043227//membrane-bounded organelle;GO:0005623//cell;GO:0031224//intrinsic component of membrane;GO:0043229//intracellular organelle;GO:0031090//organelle membrane;GO:0016020//membrane;GO:0044464//cell part;GO:0005622//intracellular;GO:0044422//organelle part;GO:0043231//intracellular membrane-bounded organelle	GO:0016410//N-acyltransferase activity;GO:0016746//transferase activity, transferring acyl groups;GO:0016740//transferase activity;GO:0016747//transferase activity, transferring acyl groups other than amino-acyl groups;GO:0003824//catalytic activity	GO:0006629//lipid metabolic process;GO:0001676//long-chain fatty acid metabolic process;GO:0044281//small molecule metabolic process;GO:0044763//single-organism cellular process;GO:0044699//single-organism process;GO:0009987//cellular process;GO:0044249//cellular biosynthetic process;GO:0006807//nitrogen compound metabolic process;GO:0044711//single-organism biosynthetic process;GO:0006643//membr…
Unigene0040402	AOX4	PREDICTED: ubiquinol oxidase 4, chloroplastic/chromoplastic isoform X1 [Elaeis guineensis]	-	GO:0044425//membrane part;GO:0016020//membrane	-	-
Unigene0040421	CPRF1	PREDICTED: common plant regulatory factor 1-like [Phoenix dactylifera]	-	-	-	-
Unigene0040422	GBF3	PREDICTED: common plant regulatory factor 1-like isoform X2 [Vigna radiata var. radiata] [Vigna radiata]	-	-	-	GO:0009059//macromolecule biosynthetic process;GO:0043170//macromolecule metabolic process;GO:0008152//metabolic process;GO:0009987//cellular process;GO:0009058//biosynthetic process;GO:0071704//organic substance metabolic process;GO:0034645//cellular macromolecule biosynthetic process;GO:0044260//cellular macromolecule metabolic process;GO:0044249//cellular biosynthetic process;GO:1901576//organ…
Unigene0040513	PDPK1	PREDICTED: 3-phosphoinositide-dependent protein kinase 2-like [Nelumbo nucifera]	-	-	GO:0097159//organic cyclic compound binding;GO:0036094//small molecule binding;GO:0001882//nucleoside binding;GO:0016773//phosphotransferase activity, alcohol group as acceptor;GO:0005488//binding;GO:0004672//protein kinase activity;GO:0032549//ribonucleoside binding;GO:0016772//transferase activity, transferring phosphorus-containing groups;GO:0032550//purine ribonucleoside binding;GO:1901363//h…	GO:0043170//macromolecule metabolic process;GO:0006796//phosphate-containing compound metabolic process;GO:0006464//cellular protein modification process;GO:0044237//cellular metabolic process;GO:0008152//metabolic process;GO:0071704//organic substance metabolic process;GO:0009987//cellular process;GO:0036211//protein modification process;GO:0044238//primary metabolic process;GO:0006793//phosphor…
Unigene0040590	DHN3	PREDICTED: dehydrin Xero 2 [Fragaria vesca subsp. vesca] [Fragaria vesca]	-	-	-	-
Unigene0040668	ASPG1	PREDICTED: protein ASPARTIC PROTEASE IN GUARD CELL 1 [Nelumbo nucifera]	-	-	GO:0003824//catalytic activity;GO:0016787//hydrolase activity	-
Unigene0041109	At1g07590	PREDICTED: pentatricopeptide repeat-containing protein At1g07590, mitochondrial isoform X1 [Nelumbo nucifera]	-	-	-	-
Unigene0041188	CBLL1	PREDICTED: E3 ubiquitin-protein ligase Hakai [Nelumbo nucifera]	-	-	-	-
Unigene0041202	ANN1	PREDICTED: annexin D1 [Nelumbo nucifera]	-	-	-	-
Unigene0041211	-	--	-	-	-	-
Unigene0041273	At1g31850	PREDICTED: probable methyltransferase PMT21 [Elaeis guineensis]	-	-	GO:0003824//catalytic activity	GO:0008152//metabolic process
Unigene0041281	At4g32285	PREDICTED: putative clathrin assembly protein At4g40080 [Nelumbo nucifera]	-	-	GO:0003824//catalytic activity;GO:0016491//oxidoreductase activity	-
Unigene0041329	At2g17670	PREDICTED: pentatricopeptide repeat-containing protein At2g17670 [Nelumbo nucifera]	-	-	-	-
Unigene0041422	Os07g0179400	PREDICTED: phosphopantetheine adenylyltransferase [Nelumbo nucifera]	ko01100//Metabolic pathways//Global and Overview//Metabolism;ko00770//Pantothenate and CoA biosynthesis//Metabolism of cofactors and vitamins//Metabolism	-	-	-
Unigene0041423	COAD	PREDICTED: phosphopantetheine adenylyltransferase [Nelumbo nucifera]	ko01100//Metabolic pathways//Global and Overview//Metabolism;ko00770//Pantothenate and CoA biosynthesis//Metabolism of cofactors and vitamins//Metabolism	-	-	-
Unigene0041717	ybeY	Haloacid dehalogenase-like hydrolase family protein isoform 2 [Theobroma cacao]	-	-	GO:0016787//hydrolase activity;GO:0003824//catalytic activity	GO:0008152//metabolic process;GO:0043170//macromolecule metabolic process;GO:0044238//primary metabolic process;GO:0071704//organic substance metabolic process
Unigene0041728	GAMMACA1	PREDICTED: gamma carbonic anhydrase 1, mitochondrial-like [Gossypium raimondii]	-	-	-	-
Unigene0041729	GAMMACA2	PREDICTED: gamma carbonic anhydrase 1, mitochondrial [Prunus mume]	-	-	-	-
Unigene0041902	-	PREDICTED: mucin-17 isoform X2 [Vitis vinifera]	-	-	-	-
Unigene0041920	PSAF	PREDICTED: photosystem I reaction center subunit III, chloroplastic [Eucalyptus grandis]	ko01100//Metabolic pathways//Global and Overview//Metabolism;ko00195//Photosynthesis//Energy metabolism//Metabolism	GO:0005622//intracellular;GO:0043227//membrane-bounded organelle;GO:0043231//intracellular membrane-bounded organelle;GO:0009526//plastid envelope;GO:0044434//chloroplast part;GO:0005737//cytoplasm;GO:0031224//intrinsic component of membrane;GO:0044424//intracellular part;GO:0031976//plastid thylakoid;GO:0044436//thylakoid part;GO:0034357//photosynthetic membrane;GO:0043234//protein complex;GO:00…	-	GO:0044272//sulfur compound biosynthetic process;GO:0044283//small molecule biosynthetic process;GO:0008652//cellular amino acid biosynthetic process;GO:0046394//carboxylic acid biosynthetic process;GO:0044763//single-organism cellular process;GO:0016053//organic acid biosynthetic process;GO:0006807//nitrogen compound metabolic process;GO:0044281//small molecule metabolic process;GO:0000097//sulf…
Unigene0042103	-	PREDICTED: uncharacterized protein LOC104606154 isoform X3 [Nelumbo nucifera]	-	-	-	-
Unigene0042104	-	PREDICTED: uncharacterized protein LOC104606154 isoform X2 [Nelumbo nucifera]	-	-	-	-
Unigene0042105	-	PREDICTED: uncharacterized protein LOC104606154 isoform X1 [Nelumbo nucifera]	-	-	-	-
Unigene0042142	-	PREDICTED: mediator of RNA polymerase II transcription subunit 15-like [Daucus carota subsp. sativus] [Daucus carota]	-	-	-	-
Unigene0042207	SDH	ADH_zinc_N domain-containing protein/ADH_N domain-containing protein [Cephalotus follicularis]	ko01100//Metabolic pathways//Global and Overview//Metabolism;ko00040//Pentose and glucuronate interconversions//Carbohydrate metabolism//Metabolism;ko00051//Fructose and mannose metabolism//Carbohydrate metabolism//Metabolism	-	GO:0043169//cation binding;GO:0003824//catalytic activity;GO:0005488//binding;GO:0043167//ion binding	GO:0044699//single-organism process;GO:0044710//single-organism metabolic process;GO:0008152//metabolic process
Unigene0042240	-	S-adenosyl-L-methionine-dependent methyltransferases superfamily protein isoform 2 [Theobroma cacao]	-	-	GO:0003824//catalytic activity;GO:0016740//transferase activity	-
Unigene0042366	-	PREDICTED: proline-rich receptor-like protein kinase PERK2 isoform X1 [Juglans regia]	-	-	-	-
Unigene0042555	-	--	-	-	-	-
Unigene0042732	DOT4	pentatricopeptide repeat-containing family protein [Populus trichocarpa]	-	-	-	-
Unigene0042746	-	PREDICTED: myeloid leukemia factor 1-like [Phoenix dactylifera]	-	-	-	-
Unigene0042826	DCAF1	PREDICTED: DDB1- and CUL4-associated factor homolog 1 [Nelumbo nucifera]	-	-	-	-
Unigene0042849	WCRKC2	PREDICTED: thioredoxin-like 3-2, chloroplastic isoform X2 [Eucalyptus grandis]	-	GO:0043229//intracellular organelle;GO:0044435//plastid part;GO:0005737//cytoplasm;GO:0044424//intracellular part;GO:0044464//cell part;GO:0043231//intracellular membrane-bounded organelle;GO:0043226//organelle;GO:0044444//cytoplasmic part;GO:0009532//plastid stroma;GO:0005623//cell;GO:0009536//plastid;GO:0044422//organelle part;GO:0044446//intracellular organelle part;GO:0005622//intracellular;G…	GO:0003824//catalytic activity;GO:0016667//oxidoreductase activity, acting on a sulfur group of donors;GO:0015036//disulfide oxidoreductase activity;GO:0016491//oxidoreductase activity	GO:0008152//metabolic process;GO:0044763//single-organism cellular process;GO:0065008//regulation of biological quality;GO:0042592//homeostatic process;GO:0009987//cellular process;GO:0065007//biological regulation;GO:0044710//single-organism metabolic process;GO:0044699//single-organism process;GO:0019725//cellular homeostasis
Unigene0042850	WCRKC2	PREDICTED: thioredoxin-like 3-2, chloroplastic isoform X1 [Gossypium arboreum]	-	GO:0005623//cell;GO:0005737//cytoplasm;GO:0044424//intracellular part;GO:0043226//organelle;GO:0043229//intracellular organelle;GO:0044464//cell part;GO:0043231//intracellular membrane-bounded organelle;GO:0044444//cytoplasmic part;GO:0005622//intracellular;GO:0009536//plastid;GO:0043227//membrane-bounded organelle	-	GO:0044699//single-organism process
Unigene0042884	ICR1	PREDICTED: interactor of constitutive active ROPs 4-like [Nelumbo nucifera]	-	-	-	-
Unigene0042885	ICR1	PREDICTED: interactor of constitutive active ROPs 4-like [Nelumbo nucifera]	-	-	-	-
Unigene0042928	-	PREDICTED: uncharacterized protein LOC104608026 [Nelumbo nucifera]	-	-	-	-
Unigene0042948	-	GTP-dependent nucleic acid-binding protein engD [Anthurium amnicola]	-	-	-	-
Unigene0043048	-	PREDICTED: auxilin-related protein 1 [Musa acuminata subsp. malaccensis] [Musa acuminata]	-	-	-	-
Unigene0043067	D6PKL2	PREDICTED: serine/threonine-protein kinase D6PKL1-like [Nelumbo nucifera]	-	-	GO:0016740//transferase activity;GO:0097159//organic cyclic compound binding;GO:0036094//small molecule binding;GO:0032550//purine ribonucleoside binding;GO:0032549//ribonucleoside binding;GO:1901363//heterocyclic compound binding;GO:0005488//binding;GO:0016772//transferase activity, transferring phosphorus-containing groups;GO:0001883//purine nucleoside binding;GO:0016301//kinase activity;GO:000…	GO:0006793//phosphorus metabolic process;GO:0044238//primary metabolic process;GO:0006796//phosphate-containing compound metabolic process;GO:0036211//protein modification process;GO:0044237//cellular metabolic process;GO:0043412//macromolecule modification;GO:0006464//cellular protein modification process;GO:0043170//macromolecule metabolic process;GO:0008152//metabolic process;GO:0044260//cellu…
Unigene0043131	cwc15-a	cell cycle control protein [Phaseolus vulgaris]	ko03040//Spliceosome//Transcription//Genetic Information Processing	GO:0032991//macromolecular complex;GO:1990904//ribonucleoprotein complex;GO:0044424//intracellular part;GO:0030529//intracellular ribonucleoprotein complex;GO:0044464//cell part;GO:0005623//cell;GO:0005622//intracellular	-	-
Unigene0043147	RNU1	PREDICTED: U1 small nuclear ribonucleoprotein 70 kDa-like [Nelumbo nucifera]	ko03040//Spliceosome//Transcription//Genetic Information Processing	-	-	-
Unigene0043275	katnal2	PREDICTED: katanin p60 ATPase-containing subunit A-like 2 isoform X2 [Prunus mume]	-	-	GO:0036094//small molecule binding;GO:0003824//catalytic activity;GO:0032549//ribonucleoside binding;GO:0097159//organic cyclic compound binding;GO:0017111//nucleoside-triphosphatase activity;GO:0016462//pyrophosphatase activity;GO:0001882//nucleoside binding;GO:0016887//ATPase activity;GO:0042623//ATPase activity, coupled;GO:0032550//purine ribonucleoside binding;GO:0016818//hydrolase activity, …	-
Unigene0043301	KN1	PREDICTED: homeobox protein knotted-1-like 2 [Theobroma cacao]	-	GO:0043231//intracellular membrane-bounded organelle;GO:0005623//cell;GO:0043226//organelle;GO:0044424//intracellular part;GO:0043229//intracellular organelle;GO:0005622//intracellular;GO:0043227//membrane-bounded organelle;GO:0044464//cell part	GO:0097159//organic cyclic compound binding;GO:0001071//nucleic acid binding transcription factor activity;GO:0003676//nucleic acid binding;GO:0005488//binding;GO:1901363//heterocyclic compound binding;GO:0003677//DNA binding	GO:0009933//meristem structural organization;GO:0048856//anatomical structure development;GO:0003002//regionalization;GO:0000003//reproduction;GO:0060255//regulation of macromolecule metabolic process;GO:0007389//pattern specification process;GO:0048507//meristem development;GO:0003006//developmental process involved in reproduction;GO:0009799//specification of symmetry;GO:0032501//multicellular …
Unigene0043302	KN1	PREDICTED: homeobox protein knotted-1-like 2 [Theobroma cacao]	-	GO:0005623//cell;GO:0043229//intracellular organelle;GO:0043226//organelle;GO:0043231//intracellular membrane-bounded organelle;GO:0044424//intracellular part;GO:0044464//cell part;GO:0043227//membrane-bounded organelle;GO:0005622//intracellular	GO:0005488//binding;GO:0001071//nucleic acid binding transcription factor activity;GO:0097159//organic cyclic compound binding;GO:1901363//heterocyclic compound binding;GO:0003677//DNA binding;GO:0003676//nucleic acid binding	GO:0009799//specification of symmetry;GO:0000003//reproduction;GO:0044699//single-organism process;GO:0032502//developmental process;GO:0009798//axis specification;GO:0048507//meristem development;GO:0044763//single-organism cellular process;GO:0044767//single-organism developmental process;GO:0032501//multicellular organismal process;GO:0009888//tissue development;GO:0044707//single-multicellula…
Unigene0043340	-	--	-	-	-	-
Unigene0043365	cmbl	PREDICTED: endo-1,3;1,4-beta-D-glucanase isoform X2 [Ricinus communis]	-	-	GO:0016787//hydrolase activity;GO:0016788//hydrolase activity, acting on ester bonds;GO:0052689//carboxylic ester hydrolase activity;GO:0003824//catalytic activity	-
Unigene0043370	EIFSV1	eukaryotic translation initiation factor 5A4 [Camellia sinensis]	-	-	GO:1901363//heterocyclic compound binding;GO:0043021//ribonucleoprotein complex binding;GO:0097159//organic cyclic compound binding;GO:0003676//nucleic acid binding;GO:0005488//binding;GO:0044877//macromolecular complex binding;GO:0008135//translation factor activity, RNA binding;GO:0003723//RNA binding	GO:0010608//posttranscriptional regulation of gene expression;GO:0034248//regulation of cellular amide metabolic process;GO:0031323//regulation of cellular metabolic process;GO:0050789//regulation of biological process;GO:0031326//regulation of cellular biosynthetic process;GO:0080090//regulation of primary metabolic process;GO:0009889//regulation of biosynthetic process;GO:0010468//regulation of…
Unigene0043391	slr0305	PREDICTED: transmembrane protein 64 [Fragaria vesca subsp. vesca] [Fragaria vesca]	-	-	-	-
Unigene0043405	AP5M	PREDICTED: AP-5 complex subunit mu [Amborella trichopoda]	-	-	-	-
Unigene0043409	-	--	-	-	-	-
Unigene0043422	-	PREDICTED: hornerin-like isoform X3 [Phoenix dactylifera]	-	-	-	-
Unigene0043660	RPL12	PREDICTED: 50S ribosomal protein L12, chloroplastic-like [Nelumbo nucifera]	ko03010//Ribosome//Translation//Genetic Information Processing	GO:0005623//cell;GO:0005622//intracellular;GO:0044464//cell part	-	-
Unigene0043667	TIF3H1	PREDICTED: eukaryotic translation initiation factor 3 subunit H [Vitis vinifera]	ko03013//RNA transport//Translation//Genetic Information Processing	GO:0005623//cell;GO:0043234//protein complex;GO:0005737//cytoplasm;GO:0044464//cell part;GO:0032991//macromolecular complex;GO:0030529//intracellular ribonucleoprotein complex;GO:0044424//intracellular part;GO:1990904//ribonucleoprotein complex;GO:0005622//intracellular;GO:0044444//cytoplasmic part;GO:0070993//translation preinitiation complex	-	GO:0050794//regulation of cellular process;GO:0036211//protein modification process;GO:0022607//cellular component assembly;GO:0080090//regulation of primary metabolic process;GO:0044237//cellular metabolic process;GO:0006417//regulation of translation;GO:0034622//cellular macromolecular complex assembly;GO:0050789//regulation of biological process;GO:0016043//cellular component organization;GO:0…
Unigene0043757	XTH9	PREDICTED: xyloglucan endotransglucosylase/hydrolase protein 9 [Citrus sinensis]	-	GO:0044464//cell part;GO:0005576//extracellular region;GO:0071944//cell periphery;GO:0030312//external encapsulating structure;GO:0005623//cell	GO:0016758//transferase activity, transferring hexosyl groups;GO:0016757//transferase activity, transferring glycosyl groups;GO:0016787//hydrolase activity;GO:0016740//transferase activity;GO:0003824//catalytic activity	GO:0008152//metabolic process;GO:0045229//external encapsulating structure organization;GO:0044238//primary metabolic process;GO:0065007//biological regulation;GO:0071840//cellular component organization or biogenesis;GO:2000026//regulation of multicellular organismal development;GO:0005976//polysaccharide metabolic process;GO:0071704//organic substance metabolic process;GO:0050789//regulation of…
Unigene0043758	XTH9	xyloglucan endotransglycosylase/hydrolase 3, partial [Eucalyptus pilularis]	-	GO:0005623//cell;GO:0044464//cell part;GO:0071944//cell periphery;GO:0030312//external encapsulating structure;GO:0005576//extracellular region	GO:0016758//transferase activity, transferring hexosyl groups;GO:0003824//catalytic activity;GO:0016757//transferase activity, transferring glycosyl groups;GO:0016787//hydrolase activity;GO:0016740//transferase activity	GO:0065007//biological regulation;GO:0043170//macromolecule metabolic process;GO:0050793//regulation of developmental process;GO:0008152//metabolic process;GO:0009987//cellular process;GO:0071840//cellular component organization or biogenesis;GO:0045229//external encapsulating structure organization;GO:0044238//primary metabolic process;GO:0071704//organic substance metabolic process;GO:0005975//…
Unigene0043869	At3g48460	PREDICTED: GDSL esterase/lipase At3g48460-like [Nelumbo nucifera]	-	-	-	-
Unigene0043884	ADH	PREDICTED: alcohol dehydrogenase 1-like [Nelumbo nucifera]	ko01100//Metabolic pathways//Global and Overview//Metabolism;ko01110//Biosynthesis of secondary metabolites//Global and Overview//Metabolism;ko01120//Microbial metabolism in diverse environments//Global and Overview//Metabolism;ko00010//Glycolysis / Gluconeogenesis//Carbohydrate metabolism//Metabolism;ko00071//Fatty acid degradation//Lipid metabolism//Metabolism;ko00350//Tyrosine metabolism//Amin…	-	GO:0005488//binding;GO:0003824//catalytic activity;GO:0043167//ion binding;GO:0043169//cation binding	GO:0044710//single-organism metabolic process;GO:0044699//single-organism process;GO:0008152//metabolic process
Unigene0043885	ADH	PREDICTED: alcohol dehydrogenase 1-like [Nelumbo nucifera]	ko01100//Metabolic pathways//Global and Overview//Metabolism;ko01110//Biosynthesis of secondary metabolites//Global and Overview//Metabolism;ko01120//Microbial metabolism in diverse environments//Global and Overview//Metabolism;ko00010//Glycolysis / Gluconeogenesis//Carbohydrate metabolism//Metabolism;ko00071//Fatty acid degradation//Lipid metabolism//Metabolism;ko00350//Tyrosine metabolism//Amin…	-	GO:0003824//catalytic activity;GO:0043167//ion binding;GO:0043169//cation binding;GO:0005488//binding	GO:0008152//metabolic process;GO:0044699//single-organism process;GO:0044710//single-organism metabolic process
Unigene0043912	-	--	-	-	-	-
Unigene0043950	spast	PREDICTED: spastin isoform X1 [Theobroma cacao]	-	GO:0044464//cell part;GO:0005623//cell	GO:0097367//carbohydrate derivative binding;GO:0016462//pyrophosphatase activity;GO:0001883//purine nucleoside binding;GO:0032549//ribonucleoside binding;GO:0036094//small molecule binding;GO:0001882//nucleoside binding;GO:0016818//hydrolase activity, acting on acid anhydrides, in phosphorus-containing anhydrides;GO:0016817//hydrolase activity, acting on acid anhydrides;GO:0032550//purine ribonuc…	GO:0071704//organic substance metabolic process;GO:0044281//small molecule metabolic process;GO:0072594//establishment of protein localization to organelle;GO:0043574//peroxisomal transport;GO:0046907//intracellular transport;GO:1902578//single-organism localization;GO:0008152//metabolic process;GO:0072663//establishment of protein localization to peroxisome;GO:0016054//organic acid catabolic pro…
Unigene0043957	-	--	-	-	-	-
Unigene0044335	SSU5A	ribulose bisphosphate carboxylase [Lemna gibba]	ko01100//Metabolic pathways//Global and Overview//Metabolism;ko01120//Microbial metabolism in diverse environments//Global and Overview//Metabolism;ko01200//Carbon metabolism//Global and Overview//Metabolism;ko00710//Carbon fixation in photosynthetic organisms//Energy metabolism//Metabolism;ko00630//Glyoxylate and dicarboxylate metabolism//Carbohydrate metabolism//Metabolism	GO:0043231//intracellular membrane-bounded organelle;GO:0043226//organelle;GO:0043229//intracellular organelle;GO:0044424//intracellular part;GO:0044444//cytoplasmic part;GO:0044464//cell part;GO:0005622//intracellular;GO:0043227//membrane-bounded organelle;GO:0005623//cell;GO:0009536//plastid;GO:0005737//cytoplasm	GO:0003824//catalytic activity;GO:0016829//lyase activity;GO:0016831//carboxy-lyase activity;GO:0016830//carbon-carbon lyase activity	GO:0044249//cellular biosynthetic process;GO:0043094//cellular metabolic compound salvage;GO:0044237//cellular metabolic process;GO:0009058//biosynthetic process;GO:0044699//single-organism process;GO:0009987//cellular process;GO:0044710//single-organism metabolic process;GO:0008152//metabolic process
Unigene0044348	fray2	PREDICTED: serine/threonine-protein kinase BLUS1-like isoform X2 [Nelumbo nucifera]	-	-	-	-
Unigene0044569	VOZ1	PREDICTED: transcription factor VOZ1 [Nelumbo nucifera]	-	GO:0043231//intracellular membrane-bounded organelle;GO:0005623//cell;GO:0043227//membrane-bounded organelle;GO:0043226//organelle;GO:0005622//intracellular;GO:0043229//intracellular organelle;GO:0044424//intracellular part;GO:0044464//cell part	GO:1901363//heterocyclic compound binding;GO:0043169//cation binding;GO:0003677//DNA binding;GO:0097159//organic cyclic compound binding;GO:0005488//binding;GO:0043167//ion binding;GO:0003676//nucleic acid binding	GO:0009583//detection of light stimulus;GO:0009987//cellular process;GO:2000026//regulation of multicellular organismal development;GO:1903506//regulation of nucleic acid-templated transcription;GO:0051094//positive regulation of developmental process;GO:0009314//response to radiation;GO:0007165//signal transduction;GO:0007602//phototransduction;GO:0006355//regulation of transcription, DNA-templa…
Unigene0044604	-	Protease precursor [Anthurium amnicola]	-	-	-	-
Unigene0044633	-	--	-	-	-	-
Unigene0044656	At3g07070	Kinase superfamily protein [Theobroma cacao]	-	-	GO:0003824//catalytic activity;GO:0016740//transferase activity;GO:0016773//phosphotransferase activity, alcohol group as acceptor;GO:0016772//transferase activity, transferring phosphorus-containing groups;GO:0004672//protein kinase activity;GO:0016301//kinase activity	GO:0006793//phosphorus metabolic process;GO:0019538//protein metabolic process;GO:0044267//cellular protein metabolic process;GO:0044237//cellular metabolic process;GO:0043170//macromolecule metabolic process;GO:0071704//organic substance metabolic process;GO:0043412//macromolecule modification;GO:0006468//protein phosphorylation;GO:0044238//primary metabolic process;GO:0008152//metabolic process…
Unigene0044728	BASS1	Sodium Bile acid symporter family isoform 1 [Theobroma cacao]	-	GO:0043227//membrane-bounded organelle;GO:0043231//intracellular membrane-bounded organelle;GO:0031224//intrinsic component of membrane;GO:0005737//cytoplasm;GO:0009526//plastid envelope;GO:0043229//intracellular organelle;GO:0044425//membrane part;GO:0044422//organelle part;GO:0005623//cell;GO:0005622//intracellular;GO:0044435//plastid part;GO:0044444//cytoplasmic part;GO:0044464//cell part;GO:0…	GO:0015291//secondary active transmembrane transporter activity;GO:0015075//ion transmembrane transporter activity;GO:0008324//cation transmembrane transporter activity;GO:0015370//solute:sodium symporter activity;GO:0015077//monovalent inorganic cation transmembrane transporter activity;GO:0022892//substrate-specific transporter activity;GO:0022804//active transmembrane transporter activity;GO:0…	GO:0033036//macromolecule localization;GO:0006812//cation transport;GO:0010876//lipid localization;GO:0044699//single-organism process;GO:0006869//lipid transport;GO:0071702//organic substance transport;GO:1902578//single-organism localization;GO:0030001//metal ion transport;GO:0051234//establishment of localization;GO:0044765//single-organism transport;GO:0006810//transport;GO:0051179//localizat…
Unigene0044755	CAT9	PREDICTED: cationic amino acid transporter 9, chloroplastic [Nelumbo nucifera]	-	-	-	-
Unigene0044756	CAT9	PREDICTED: cationic amino acid transporter 9, chloroplastic [Nelumbo nucifera]	-	-	-	-
Unigene0044827	-	PREDICTED: centrosomal protein of 290 kDa-like isoform X2 [Nelumbo nucifera]	-	-	-	-
Unigene0044869	Utp20	PREDICTED: LOW QUALITY PROTEIN: U3 small nucleolar RNA-associated protein 20-like [Phoenix dactylifera]	-	-	-	-
Unigene0044922	PP2C	PREDICTED: protein phosphatase 2C 16-like [Nelumbo nucifera]	ko04075//Plant hormone signal transduction//Signal transduction//Environmental Information Processing	-	-	-
Unigene0044956	HST	PREDICTED: shikimate O-hydroxycinnamoyltransferase [Nelumbo nucifera]	-	-	-	-
Unigene0044971	-	--	-	-	-	-
Unigene0045107	ARR14	PREDICTED: myb family transcription factor EFM [Nelumbo nucifera]	-	-	-	-
Unigene0045108	At2g44130	PREDICTED: F-box/kelch-repeat protein At1g15670-like [Nelumbo nucifera]	-	-	-	-
Unigene0045229	SSR2	PREDICTED: translocon-associated protein subunit beta-like [Nelumbo nucifera]	ko04141//Protein processing in endoplasmic reticulum//Folding, sorting and degradation//Genetic Information Processing	GO:0044422//organelle part;GO:0031090//organelle membrane;GO:0005622//intracellular;GO:0016020//membrane;GO:0043229//intracellular organelle;GO:0043226//organelle;GO:0005623//cell;GO:0044425//membrane part;GO:0005911//cell-cell junction;GO:0043231//intracellular membrane-bounded organelle;GO:0031224//intrinsic component of membrane;GO:0043227//membrane-bounded organelle;GO:0030054//cell junction;…	-	GO:0033554//cellular response to stress;GO:0098542//defense response to other organism;GO:0006950//response to stress;GO:0009987//cellular process;GO:0050896//response to stimulus;GO:0009605//response to external stimulus;GO:0043207//response to external biotic stimulus;GO:0006952//defense response;GO:0006955//immune response;GO:0002376//immune system process;GO:0045087//innate immune response;GO…
Unigene0045230	SSR2	translocon-associated protein subunit beta [Ananas comosus]	ko04141//Protein processing in endoplasmic reticulum//Folding, sorting and degradation//Genetic Information Processing	GO:0044425//membrane part;GO:0031224//intrinsic component of membrane;GO:0016020//membrane	-	-
Unigene0045422	BETAA-AD	PREDICTED: beta-adaptin-like protein A [Cucumis sativus]	-	-	-	-
Unigene0045504	SCC3	PREDICTED: sister-chromatid cohesion protein 3 [Elaeis guineensis]	-	-	-	-
Unigene0045557	SPL5	squamosa promoter binding protein-like 3d [Platanus x hispanica]	-	-	-	-
Unigene0045560	MDH1	PREDICTED: malate dehydrogenase [NADP], chloroplastic-like [Nelumbo nucifera]	ko01100//Metabolic pathways//Global and Overview//Metabolism;ko01120//Microbial metabolism in diverse environments//Global and Overview//Metabolism;ko01200//Carbon metabolism//Global and Overview//Metabolism;ko00620//Pyruvate metabolism//Carbohydrate metabolism//Metabolism;ko00710//Carbon fixation in photosynthetic organisms//Energy metabolism//Metabolism	-	GO:0016615//malate dehydrogenase activity;GO:0016614//oxidoreductase activity, acting on CH-OH group of donors;GO:0003824//catalytic activity;GO:0016491//oxidoreductase activity	GO:0044238//primary metabolic process;GO:0006082//organic acid metabolic process;GO:0009987//cellular process;GO:0044763//single-organism cellular process;GO:0008152//metabolic process;GO:0043436//oxoacid metabolic process;GO:0044699//single-organism process;GO:0071704//organic substance metabolic process;GO:0044237//cellular metabolic process;GO:0044281//small molecule metabolic process;GO:00436…
Unigene0045692	-	hypothetical protein CFOL_v3_14229 [Cephalotus follicularis]	-	-	-	-
Unigene0045732	-	--	-	-	-	-
Unigene0045819	-	PREDICTED: midasin-like [Nelumbo nucifera]	-	-	-	-
Unigene0045874	-	PREDICTED: heavy metal-associated isoprenylated plant protein 3-like [Nelumbo nucifera]	-	-	-	-
Unigene0045875	-	PREDICTED: heavy metal-associated isoprenylated plant protein 3-like [Nelumbo nucifera]	-	-	-	-
Unigene0045890	F6'H2	PREDICTED: protein DMR6-LIKE OXYGENASE 1-like [Nelumbo nucifera]	-	-	GO:0043167//ion binding;GO:0043169//cation binding;GO:0005488//binding;GO:0016491//oxidoreductase activity;GO:0016705//oxidoreductase activity, acting on paired donors, with incorporation or reduction of molecular oxygen;GO:0003824//catalytic activity	GO:0008152//metabolic process;GO:0044699//single-organism process;GO:0044710//single-organism metabolic process
Unigene0045940	ARP5	PREDICTED: actin-related protein 5-like isoform X1 [Phoenix dactylifera]	-	GO:1902494//catalytic complex;GO:0005623//cell;GO:0032991//macromolecular complex;GO:0044424//intracellular part;GO:0033202//DNA helicase complex;GO:0043234//protein complex;GO:0044464//cell part;GO:0005622//intracellular	-	GO:0010468//regulation of gene expression;GO:0019222//regulation of metabolic process;GO:0065007//biological regulation;GO:0060255//regulation of macromolecule metabolic process;GO:0050789//regulation of biological process
Unigene0045945	At1g05000	PREDICTED: probable tyrosine-protein phosphatase At1g05000 [Nelumbo nucifera]	-	-	GO:0016788//hydrolase activity, acting on ester bonds;GO:0003824//catalytic activity;GO:0016787//hydrolase activity;GO:0042578//phosphoric ester hydrolase activity	GO:0043170//macromolecule metabolic process;GO:0009987//cellular process;GO:0008152//metabolic process;GO:0044238//primary metabolic process;GO:0044260//cellular macromolecule metabolic process;GO:0016311//dephosphorylation;GO:0006470//protein dephosphorylation;GO:0019538//protein metabolic process;GO:0071704//organic substance metabolic process;GO:0044267//cellular protein metabolic process;GO:0…
Unigene0045981	CSN5B	PREDICTED: COP9 signalosome complex subunit 5b-like [Nelumbo nucifera]	-	-	-	-
Unigene0046021	SPAC2F3.16	PREDICTED: zinc finger protein BRUTUS-like isoform X2 [Elaeis guineensis]	-	-	GO:0043167//ion binding;GO:0043169//cation binding;GO:0005488//binding	-
Unigene0046022	-	--	-	-	-	-
Unigene0046036	mnmG	tRNA uridine 5-carboxymethylaminomethyl modification enzyme MnmG, partial [Anthurium amnicola]	-	-	GO:1901265//nucleoside phosphate binding;GO:0000166//nucleotide binding;GO:0097159//organic cyclic compound binding;GO:0036094//small molecule binding;GO:1901363//heterocyclic compound binding;GO:0005488//binding	GO:0009987//cellular process;GO:0008152//metabolic process;GO:0046483//heterocycle metabolic process;GO:0071704//organic substance metabolic process;GO:0006139//nucleobase-containing compound metabolic process;GO:0006399//tRNA metabolic process;GO:0044237//cellular metabolic process;GO:0044260//cellular macromolecule metabolic process;GO:0090304//nucleic acid metabolic process;GO:0006725//cellula…
Unigene0046038	mnmG	tRNA uridine 5-carboxymethylaminomethyl modification enzyme MnmG [Morus notabilis]	-	-	GO:0005488//binding;GO:0000166//nucleotide binding;GO:0097159//organic cyclic compound binding;GO:1901363//heterocyclic compound binding;GO:1901265//nucleoside phosphate binding;GO:0036094//small molecule binding	-
Unigene0046141	TPIP1	PREDICTED: triosephosphate isomerase, chloroplastic isoform X1 [Nelumbo nucifera]	ko01100//Metabolic pathways//Global and Overview//Metabolism;ko01110//Biosynthesis of secondary metabolites//Global and Overview//Metabolism;ko01130//Biosynthesis of antibiotics//Global and Overview//Metabolism;ko01120//Microbial metabolism in diverse environments//Global and Overview//Metabolism;ko01200//Carbon metabolism//Global and Overview//Metabolism;ko01230//Biosynthesis of amino acids//Glo…	GO:0005576//extracellular region;GO:0044444//cytoplasmic part;GO:0044446//intracellular organelle part;GO:0009536//plastid;GO:0031975//envelope;GO:0005737//cytoplasm;GO:0005622//intracellular;GO:0044424//intracellular part;GO:0043226//organelle;GO:0043229//intracellular organelle;GO:0043227//membrane-bounded organelle;GO:0044422//organelle part;GO:0009532//plastid stroma;GO:0044435//plastid part;…	GO:0016853//isomerase activity;GO:0003824//catalytic activity;GO:0016861//intramolecular oxidoreductase activity, interconverting aldoses and ketoses;GO:0016860//intramolecular oxidoreductase activity	GO:0044711//single-organism biosynthetic process;GO:0006790//sulfur compound metabolic process;GO:0006796//phosphate-containing compound metabolic process;GO:0009628//response to abiotic stimulus;GO:0033036//macromolecule localization;GO:0009058//biosynthetic process;GO:0007275//multicellular organism development;GO:0000003//reproduction;GO:0099402//plant organ development;GO:0008152//metabolic p…
Unigene0046142	TPI	PREDICTED: triosephosphate isomerase, chloroplastic [Juglans regia]	ko01100//Metabolic pathways//Global and Overview//Metabolism;ko01110//Biosynthesis of secondary metabolites//Global and Overview//Metabolism;ko01130//Biosynthesis of antibiotics//Global and Overview//Metabolism;ko01120//Microbial metabolism in diverse environments//Global and Overview//Metabolism;ko01200//Carbon metabolism//Global and Overview//Metabolism;ko01230//Biosynthesis of amino acids//Glo…	GO:0005622//intracellular;GO:0005576//extracellular region;GO:0031967//organelle envelope;GO:0043229//intracellular organelle;GO:0044422//organelle part;GO:0005737//cytoplasm;GO:0044444//cytoplasmic part;GO:0043227//membrane-bounded organelle;GO:0043231//intracellular membrane-bounded organelle;GO:0005623//cell;GO:0044446//intracellular organelle part;GO:0044424//intracellular part;GO:0044435//pl…	GO:0016853//isomerase activity;GO:0016861//intramolecular oxidoreductase activity, interconverting aldoses and ketoses;GO:0016860//intramolecular oxidoreductase activity;GO:0003824//catalytic activity	GO:0009072//aromatic amino acid family metabolic process;GO:0033036//macromolecule localization;GO:0044262//cellular carbohydrate metabolic process;GO:0044707//single-multicellular organism process;GO:1901566//organonitrogen compound biosynthetic process;GO:0006071//glycerol metabolic process;GO:0010817//regulation of hormone levels;GO:0022622//root system development;GO:0009628//response to abio…
Unigene0046159	KRP5	PREDICTED: cyclin-dependent kinase inhibitor 1-like [Nelumbo nucifera]	-	-	-	GO:0009987//cellular process
Unigene0046178	CCH	PREDICTED: heavy metal-associated isoprenylated plant protein 3-like [Nelumbo nucifera]	-	-	-	-
Unigene0046180	-	PREDICTED: heavy metal-associated isoprenylated plant protein 3-like [Nelumbo nucifera]	-	-	-	-
Unigene0046213	eft201	elongation factor 2 [Ananas comosus]	-	GO:0032991//macromolecular complex;GO:0030529//intracellular ribonucleoprotein complex;GO:1990904//ribonucleoprotein complex;GO:0044464//cell part;GO:0005622//intracellular;GO:0005623//cell;GO:0044424//intracellular part	GO:0097367//carbohydrate derivative binding;GO:0003824//catalytic activity;GO:0003723//RNA binding;GO:0016462//pyrophosphatase activity;GO:0032550//purine ribonucleoside binding;GO:0016818//hydrolase activity, acting on acid anhydrides, in phosphorus-containing anhydrides;GO:0016817//hydrolase activity, acting on acid anhydrides;GO:1901363//heterocyclic compound binding;GO:0032549//ribonucleoside…	GO:0044260//cellular macromolecule metabolic process;GO:0071704//organic substance metabolic process;GO:0008152//metabolic process;GO:1901576//organic substance biosynthetic process;GO:0009058//biosynthetic process;GO:0044249//cellular biosynthetic process;GO:0009059//macromolecule biosynthetic process;GO:0044237//cellular metabolic process;GO:0009987//cellular process;GO:0043170//macromolecule m…
Unigene0046232	FUL-like	AP1, partial [Persea americana]	-	GO:0044464//cell part;GO:0043231//intracellular membrane-bounded organelle;GO:0005623//cell;GO:0043229//intracellular organelle;GO:0044424//intracellular part;GO:0043227//membrane-bounded organelle;GO:0043226//organelle;GO:0005622//intracellular	GO:0005488//binding;GO:0005515//protein binding;GO:0001071//nucleic acid binding transcription factor activity	GO:0042440//pigment metabolic process;GO:0051239//regulation of multicellular organismal process;GO:0048507//meristem development;GO:0050789//regulation of biological process;GO:0044260//cellular macromolecule metabolic process;GO:0065007//biological regulation;GO:0009812//flavonoid metabolic process;GO:0044767//single-organism developmental process;GO:0010074//maintenance of meristem identity;GO…
Unigene0046249	-	Glutamate--cysteine ligase [Anthurium amnicola]	-	-	-	-
Unigene0046250	-	Glutamate--cysteine ligase [Anthurium amnicola]	-	-	-	-
Unigene0046361	-	hypothetical protein PRUPE_ppa013160mg [Prunus persica]	-	-	-	-
Unigene0046366	SPBC9B6.07	PREDICTED: ribosomal RNA processing protein 1 homolog B [Nelumbo nucifera]	-	-	-	-
Unigene0046423	PNP2	PREDICTED: polyribonucleotide nucleotidyltransferase 2, mitochondrial [Vitis vinifera]	ko00230//Purine metabolism//Nucleotide metabolism//Metabolism;ko03018//RNA degradation//Folding, sorting and degradation//Genetic Information Processing;ko00240//Pyrimidine metabolism//Nucleotide metabolism//Metabolism	-	GO:0016740//transferase activity;GO:0016779//nucleotidyltransferase activity;GO:0097159//organic cyclic compound binding;GO:0003824//catalytic activity;GO:0005488//binding;GO:0016772//transferase activity, transferring phosphorus-containing groups;GO:1901363//heterocyclic compound binding;GO:0003676//nucleic acid binding	GO:0090501//RNA phosphodiester bond hydrolysis;GO:0009056//catabolic process;GO:0019439//aromatic compound catabolic process;GO:0044237//cellular metabolic process;GO:0044260//cellular macromolecule metabolic process;GO:0044265//cellular macromolecule catabolic process;GO:0009057//macromolecule catabolic process;GO:0006725//cellular aromatic compound metabolic process;GO:0016070//RNA metabolic pr…
Unigene0046540	FER	PREDICTED: receptor-like protein kinase FERONIA [Nelumbo nucifera]	-	-	-	-
Unigene0046576	Isy1	PREDICTED: pre-mRNA-splicing factor ISY1 homolog [Beta vulgaris subsp. vulgaris] [Beta vulgaris]	ko03040//Spliceosome//Transcription//Genetic Information Processing	-	-	-
Unigene0046608	IQD32	PREDICTED: protein IQ-DOMAIN 14-like [Nelumbo nucifera]	-	-	-	-
Unigene0046642	-	PREDICTED: autophagy-related protein 11 [Nelumbo nucifera]	-	-	-	-
Unigene0046657	EAF1A	PREDICTED: chromatin modification-related protein EAF1 B-like isoform X1 [Nelumbo nucifera]	-	-	-	-
Unigene0046676	SSL3	PREDICTED: protein STRICTOSIDINE SYNTHASE-LIKE 3 [Ziziphus jujuba]	-	-	-	-
Unigene0046677	SSL3	PREDICTED: protein STRICTOSIDINE SYNTHASE-LIKE 3-like [Juglans regia]	-	-	-	-
Unigene0046815	Os03g0120900	PREDICTED: B3 domain-containing protein Os03g0120900-like [Nelumbo nucifera]	-	-	-	-
Unigene0046826	-	--	-	-	-	-
Unigene0046830	FKBP15-1	PREDICTED: peptidyl-prolyl cis-trans isomerase FKBP15-1 [Vitis vinifera]	-	-	-	-
Unigene0046831	FKBP15-1	PREDICTED: peptidyl-prolyl cis-trans isomerase FKBP15-1 [Vitis vinifera]	-	-	GO:0016859//cis-trans isomerase activity;GO:0003824//catalytic activity;GO:0016853//isomerase activity	GO:0044260//cellular macromolecule metabolic process;GO:0044237//cellular metabolic process;GO:0009987//cellular process;GO:0071704//organic substance metabolic process;GO:0044267//cellular protein metabolic process;GO:0019538//protein metabolic process;GO:0008152//metabolic process;GO:0043170//macromolecule metabolic process;GO:0044238//primary metabolic process
Unigene0046875	ALATS	PREDICTED: alanine--tRNA ligase [Nelumbo nucifera]	ko00970//Aminoacyl-tRNA biosynthesis//Translation//Genetic Information Processing	GO:0005623//cell;GO:0044464//cell part;GO:0044424//intracellular part;GO:0043226//organelle;GO:0043227//membrane-bounded organelle;GO:0005622//intracellular;GO:0043229//intracellular organelle;GO:0043231//intracellular membrane-bounded organelle	GO:0046872//metal ion binding;GO:0016876//ligase activity, forming aminoacyl-tRNA and related compounds;GO:0005488//binding;GO:0036094//small molecule binding;GO:0032549//ribonucleoside binding;GO:0016874//ligase activity;GO:0004812//aminoacyl-tRNA ligase activity;GO:0046914//transition metal ion binding;GO:0003824//catalytic activity;GO:0001882//nucleoside binding;GO:0043167//ion binding;GO:0032…	GO:0006725//cellular aromatic compound metabolic process;GO:0006520//cellular amino acid metabolic process;GO:0010467//gene expression;GO:0006418//tRNA aminoacylation for protein translation;GO:0034645//cellular macromolecule biosynthetic process;GO:0071704//organic substance metabolic process;GO:0043603//cellular amide metabolic process;GO:0043039//tRNA aminoacylation;GO:0034641//cellular nitrog…
Unigene0046895	CBWD2	PREDICTED: COBW domain-containing protein 1-like isoform X1 [Nelumbo nucifera]	-	-	-	-
Unigene0046977	Os03g0268000	PREDICTED: serine/threonine-protein phosphatase PP1 [Amborella trichopoda]	ko03015//mRNA surveillance pathway//Translation//Genetic Information Processing	-	GO:0003824//catalytic activity	GO:0008152//metabolic process;GO:0044237//cellular metabolic process;GO:0009987//cellular process;GO:0006796//phosphate-containing compound metabolic process;GO:0006793//phosphorus metabolic process
Unigene0047038	Rprd1b	PREDICTED: regulation of nuclear pre-mRNA domain-containing protein 1B-like [Nelumbo nucifera]	-	-	-	-
Unigene0047189	UGT82A1	PREDICTED: UDP-glycosyltransferase 82A1 [Prunus mume]	-	-	GO:0016740//transferase activity;GO:0003824//catalytic activity	-
Unigene0047291	efg1	PREDICTED: rRNA-processing protein EFG1 isoform X1 [Ricinus communis]	-	-	-	-
Unigene0047292	-	PREDICTED: rRNA-processing protein EFG1 isoform X1 [Cucumis sativus]	-	-	-	-
Unigene0047567	Vps8	PREDICTED: vacuolar protein sorting-associated protein 8 homolog isoform X2 [Nelumbo nucifera]	-	-	GO:0043167//ion binding;GO:0005488//binding;GO:0043169//cation binding;GO:0046872//metal ion binding	-
Unigene0047766	ALDH2C4	PREDICTED: aldehyde dehydrogenase family 2 member C4-like [Nelumbo nucifera]	ko00940//Phenylpropanoid biosynthesis//Biosynthesis of other secondary metabolites//Metabolism	-	GO:0016491//oxidoreductase activity;GO:0016903//oxidoreductase activity, acting on the aldehyde or oxo group of donors;GO:0003824//catalytic activity	GO:0044699//single-organism process;GO:0008152//metabolic process;GO:0044710//single-organism metabolic process
Unigene0047814	-	--	-	-	-	-
Unigene0047840	-	PREDICTED: myosin-9 isoform X1 [Nelumbo nucifera]	-	-	-	-
Unigene0047849	-	PREDICTED: uncharacterized protein LOC104592492 isoform X1 [Nelumbo nucifera]	-	-	-	-
Unigene0047852	-	PREDICTED: uncharacterized protein LOC104592492 isoform X2 [Nelumbo nucifera]	-	-	-	-
Unigene0047914	-	Methionyl-tRNA formyltransferase [Anthurium amnicola]	-	-	-	-
Unigene0047960	-	PREDICTED: atherin [Eucalyptus grandis]	-	-	-	-
Unigene0048016	GT-3B	PREDICTED: trihelix transcription factor GT-3b-like [Vigna radiata var. radiata] [Vigna radiata]	-	-	-	-
Unigene0048018	GT-3B	PREDICTED: trihelix transcription factor GT-3b-like [Nelumbo nucifera]	-	-	-	-
Unigene0048020	GT-3B	PREDICTED: trihelix transcription factor GT-3b-like, partial [Vigna angularis]	-	GO:0044424//intracellular part;GO:0043227//membrane-bounded organelle;GO:0043231//intracellular membrane-bounded organelle;GO:0043226//organelle;GO:0044464//cell part;GO:0005622//intracellular;GO:0043229//intracellular organelle;GO:0005623//cell	GO:1901363//heterocyclic compound binding;GO:0097159//organic cyclic compound binding;GO:0001071//nucleic acid binding transcription factor activity;GO:0003676//nucleic acid binding;GO:0005488//binding;GO:0003677//DNA binding	GO:0044237//cellular metabolic process;GO:0071704//organic substance metabolic process;GO:0010468//regulation of gene expression;GO:0050789//regulation of biological process;GO:0009058//biosynthetic process;GO:0019222//regulation of metabolic process;GO:0043170//macromolecule metabolic process;GO:0065007//biological regulation;GO:0060255//regulation of macromolecule metabolic process;GO:1901576//…
Unigene0048119	MADS6	AGL6-like protein [Chimonanthus praecox]	-	GO:0043227//membrane-bounded organelle;GO:0005623//cell;GO:0005622//intracellular;GO:0043231//intracellular membrane-bounded organelle;GO:0043229//intracellular organelle;GO:0044424//intracellular part;GO:0044464//cell part;GO:0043226//organelle	GO:0005488//binding;GO:0005515//protein binding;GO:0001071//nucleic acid binding transcription factor activity	GO:0009987//cellular process;GO:0060255//regulation of macromolecule metabolic process;GO:0008152//metabolic process;GO:0044249//cellular biosynthetic process;GO:0034645//cellular macromolecule biosynthetic process;GO:0010468//regulation of gene expression;GO:0050789//regulation of biological process;GO:0009058//biosynthetic process;GO:1901576//organic substance biosynthetic process;GO:0009059//m…
Unigene0048136	ELF6	PREDICTED: probable lysine-specific demethylase ELF6 isoform X1 [Vitis vinifera]	-	-	-	-
Unigene0048172	RBM28	PREDICTED: RNA-binding protein 28 isoform X1 [Nelumbo nucifera]	ko03008//Ribosome biogenesis in eukaryotes//Translation//Genetic Information Processing	-	-	-
Unigene0048201	-	--	-	-	-	-
Unigene0048434	MIP3	PREDICTED: sec1 family domain-containing protein MIP3-like isoform X1 [Ziziphus jujuba]	-	-	-	-
Unigene0048444	NSF	PREDICTED: vesicle-fusing ATPase-like isoform X1 [Elaeis guineensis]	-	-	-	-
Unigene0048449	GLU	PREDICTED: ferredoxin-dependent glutamate synthase, chloroplastic [Nelumbo nucifera]	ko01120//Microbial metabolism in diverse environments//Global and Overview//Metabolism;ko00630//Glyoxylate and dicarboxylate metabolism//Carbohydrate metabolism//Metabolism;ko00910//Nitrogen metabolism//Energy metabolism//Metabolism	-	GO:0003824//catalytic activity;GO:0016491//oxidoreductase activity;GO:0016638//oxidoreductase activity, acting on the CH-NH2 group of donors	GO:0008152//metabolic process;GO:0006536//glutamate metabolic process;GO:0043436//oxoacid metabolic process;GO:0044238//primary metabolic process;GO:0044710//single-organism metabolic process;GO:1901605//alpha-amino acid metabolic process;GO:0006082//organic acid metabolic process;GO:0006520//cellular amino acid metabolic process;GO:0006807//nitrogen compound metabolic process;GO:0019752//carboxy…
Unigene0048450	FdGOGAT	Ferredoxin-dependent glutamate synthase, chloroplastic [Anthurium amnicola]	ko01120//Microbial metabolism in diverse environments//Global and Overview//Metabolism;ko00630//Glyoxylate and dicarboxylate metabolism//Carbohydrate metabolism//Metabolism;ko00910//Nitrogen metabolism//Energy metabolism//Metabolism	-	GO:0016491//oxidoreductase activity;GO:0003824//catalytic activity;GO:0016638//oxidoreductase activity, acting on the CH-NH2 group of donors	GO:0006536//glutamate metabolic process;GO:1901605//alpha-amino acid metabolic process;GO:0043648//dicarboxylic acid metabolic process;GO:0019752//carboxylic acid metabolic process;GO:0044238//primary metabolic process;GO:0071704//organic substance metabolic process;GO:0044699//single-organism process;GO:0006807//nitrogen compound metabolic process;GO:0006082//organic acid metabolic process;GO:00…
Unigene0048512	STP14	PREDICTED: sugar transport protein 14-like [Phoenix dactylifera]	-	GO:0044425//membrane part;GO:0031224//intrinsic component of membrane;GO:0016020//membrane	GO:0003824//catalytic activity;GO:0016491//oxidoreductase activity;GO:0016628//oxidoreductase activity, acting on the CH-CH group of donors, NAD or NADP as acceptor;GO:0022857//transmembrane transporter activity;GO:0016627//oxidoreductase activity, acting on the CH-CH group of donors;GO:0005215//transporter activity	GO:0044763//single-organism cellular process;GO:0006810//transport;GO:0044710//single-organism metabolic process;GO:0044765//single-organism transport;GO:0051234//establishment of localization;GO:0051179//localization;GO:0008152//metabolic process;GO:1902578//single-organism localization;GO:0044699//single-organism process;GO:0009987//cellular process
Unigene0048584	TPLATE	PREDICTED: protein TPLATE-like [Nelumbo nucifera]	-	GO:0005737//cytoplasm;GO:0005911//cell-cell junction;GO:0043228//non-membrane-bounded organelle;GO:0005622//intracellular;GO:0043229//intracellular organelle;GO:0044444//cytoplasmic part;GO:0044424//intracellular part;GO:0016020//membrane;GO:0043232//intracellular non-membrane-bounded organelle;GO:0044464//cell part;GO:0043226//organelle;GO:0030054//cell junction;GO:0005623//cell	-	GO:0030243//cellulose metabolic process;GO:0043170//macromolecule metabolic process;GO:0051179//localization;GO:0044042//glucan metabolic process;GO:0007275//multicellular organism development;GO:0071704//organic substance metabolic process;GO:0006073//cellular glucan metabolic process;GO:0006810//transport;GO:0044262//cellular carbohydrate metabolic process;GO:0044707//single-multicellular organ…
Unigene0048606	TRABD	PREDICTED: traB domain-containing protein-like [Nelumbo nucifera]	-	-	-	-
Unigene0048660	OVA9	PREDICTED: glutamine--tRNA ligase [Nelumbo nucifera]	ko01100//Metabolic pathways//Global and Overview//Metabolism;ko00970//Aminoacyl-tRNA biosynthesis//Translation//Genetic Information Processing	GO:0005623//cell;GO:0044424//intracellular part;GO:0005622//intracellular;GO:0044464//cell part	GO:0016874//ligase activity;GO:0004812//aminoacyl-tRNA ligase activity;GO:0016875//ligase activity, forming carbon-oxygen bonds;GO:0003824//catalytic activity;GO:0097367//carbohydrate derivative binding;GO:0097159//organic cyclic compound binding;GO:0032550//purine ribonucleoside binding;GO:0001883//purine nucleoside binding;GO:0005488//binding;GO:0016876//ligase activity, forming aminoacyl-tRNA …	GO:0019752//carboxylic acid metabolic process;GO:0043039//tRNA aminoacylation;GO:0044710//single-organism metabolic process;GO:0006518//peptide metabolic process;GO:0006399//tRNA metabolic process;GO:0006082//organic acid metabolic process;GO:0043038//amino acid activation;GO:0044238//primary metabolic process;GO:0009987//cellular process;GO:1901564//organonitrogen compound metabolic process;GO:0…
Unigene0048694	-	--	-	-	-	-
Unigene0048813	-	--	-	-	-	-
Unigene0048952	At3g49730	Pentatricopeptide repeat-containing protein [Cynara cardunculus var. scolymus] [Cynara cardunculus]	-	-	-	-
Unigene0048958	FKBP53	Peptidyl-prolyl cis-trans isomerase FKBP53 [Anthurium amnicola]	-	-	-	-
Unigene0048995	-	PREDICTED: uncharacterized protein LOC8277156 [Ricinus communis]	-	-	-	-
Unigene0049034	HPD	PREDICTED: 4-hydroxyphenylpyruvate dioxygenase [Nelumbo nucifera]	ko01100//Metabolic pathways//Global and Overview//Metabolism;ko00350//Tyrosine metabolism//Amino acid metabolism//Metabolism;ko00360//Phenylalanine metabolism//Amino acid metabolism//Metabolism;ko00130//Ubiquinone and other terpenoid-quinone biosynthesis//Metabolism of cofactors and vitamins//Metabolism	-	GO:0003824//catalytic activity;GO:0005488//binding;GO:0043169//cation binding;GO:0043167//ion binding;GO:0016491//oxidoreductase activity	GO:0043436//oxoacid metabolic process;GO:0071704//organic substance metabolic process;GO:0006082//organic acid metabolic process;GO:0044238//primary metabolic process;GO:0044699//single-organism process;GO:0009987//cellular process;GO:0044281//small molecule metabolic process;GO:0044237//cellular metabolic process;GO:1901564//organonitrogen compound metabolic process;GO:0019752//carboxylic acid m…
Unigene0049085	At3g50520	PREDICTED: phosphoglycerate mutase-like protein 4 isoform X1 [Nelumbo nucifera]	ko01100//Metabolic pathways//Global and Overview//Metabolism;ko01110//Biosynthesis of secondary metabolites//Global and Overview//Metabolism;ko01130//Biosynthesis of antibiotics//Global and Overview//Metabolism;ko01120//Microbial metabolism in diverse environments//Global and Overview//Metabolism;ko01200//Carbon metabolism//Global and Overview//Metabolism;ko01230//Biosynthesis of amino acids//Glo…	-	-	-
Unigene0049139	At3g26560	PREDICTED: LOW QUALITY PROTEIN: ATP-dependent RNA helicase DEAH12, chloroplastic-like [Phoenix dactylifera]	ko03040//Spliceosome//Transcription//Genetic Information Processing	-	GO:0016817//hydrolase activity, acting on acid anhydrides;GO:0042623//ATPase activity, coupled;GO:0046872//metal ion binding;GO:0005488//binding;GO:0046914//transition metal ion binding;GO:0001883//purine nucleoside binding;GO:0032549//ribonucleoside binding;GO:0043169//cation binding;GO:0016787//hydrolase activity;GO:0003824//catalytic activity;GO:0016887//ATPase activity;GO:0036094//small molec…	-
Unigene0049170	CP12-3	PREDICTED: calvin cycle protein CP12-3, chloroplastic [Nelumbo nucifera]	-	GO:0044424//intracellular part;GO:0043231//intracellular membrane-bounded organelle;GO:0005623//cell;GO:0043227//membrane-bounded organelle;GO:0032991//macromolecular complex;GO:0005737//cytoplasm;GO:0043226//organelle;GO:0009536//plastid;GO:0005622//intracellular;GO:0044444//cytoplasmic part;GO:0044464//cell part;GO:0043229//intracellular organelle	GO:0043167//ion binding;GO:0046914//transition metal ion binding;GO:0046872//metal ion binding;GO:0043169//cation binding;GO:0005488//binding	GO:0009892//negative regulation of metabolic process;GO:0071704//organic substance metabolic process;GO:0065007//biological regulation;GO:0048519//negative regulation of biological process;GO:0044699//single-organism process;GO:0009890//negative regulation of biosynthetic process;GO:0008152//metabolic process;GO:0044710//single-organism metabolic process;GO:0019222//regulation of metabolic proces…
Unigene0049171	Surf2	PREDICTED: surfeit locus protein 2 isoform X1 [Elaeis guineensis]	-	-	-	-
Unigene0049198	TOR1	PREDICTED: microtubule-associated protein TORTIFOLIA1-like [Nelumbo nucifera]	-	-	-	-
Unigene0049298	-	PREDICTED: protein SMAX1-LIKE 3-like [Nelumbo nucifera]	-	-	-	-
Unigene0049314	BCCP1	PREDICTED: biotin carboxyl carrier protein of acetyl-CoA carboxylase 2, chloroplastic-like [Nelumbo nucifera]	ko01100//Metabolic pathways//Global and Overview//Metabolism;ko01110//Biosynthesis of secondary metabolites//Global and Overview//Metabolism;ko01130//Biosynthesis of antibiotics//Global and Overview//Metabolism;ko01120//Microbial metabolism in diverse environments//Global and Overview//Metabolism;ko01200//Carbon metabolism//Global and Overview//Metabolism;ko00620//Pyruvate metabolism//Carbohydrat…	-	-	-
Unigene0049351	RLK1	PREDICTED: G-type lectin S-receptor-like serine/threonine-protein kinase LECRK3 [Nelumbo nucifera]	-	-	GO:0003824//catalytic activity;GO:0016740//transferase activity;GO:0016301//kinase activity;GO:0016772//transferase activity, transferring phosphorus-containing groups	-
Unigene0049385	CYP80B2	PREDICTED: probable (S)-N-methylcoclaurine 3'-hydroxylase isozyme 2 [Populus euphratica]	-	-	GO:0016705//oxidoreductase activity, acting on paired donors, with incorporation or reduction of molecular oxygen;GO:0016491//oxidoreductase activity;GO:0043167//ion binding;GO:0005488//binding;GO:0003824//catalytic activity;GO:0046872//metal ion binding;GO:0043169//cation binding	-
Unigene0049389	RS40	PREDICTED: serine/arginine-rich splicing factor RS41 isoform X1 [Nelumbo nucifera]	ko03040//Spliceosome//Transcription//Genetic Information Processing	-	-	-
Unigene0049390	RS40	PREDICTED: serine/arginine-rich splicing factor RS41 isoform X1 [Nelumbo nucifera]	ko03040//Spliceosome//Transcription//Genetic Information Processing	-	-	-
Unigene0049395	FH6	PREDICTED: formin-like protein 6 [Nelumbo nucifera]	-	GO:0043226//organelle;GO:0044464//cell part;GO:0005622//intracellular;GO:0044424//intracellular part;GO:0043229//intracellular organelle;GO:0015629//actin cytoskeleton;GO:0044444//cytoplasmic part;GO:0043232//intracellular non-membrane-bounded organelle;GO:0043231//intracellular membrane-bounded organelle;GO:0044425//membrane part;GO:0016020//membrane;GO:0043228//non-membrane-bounded organelle;GO…	-	GO:0044699//single-organism process;GO:0071840//cellular component organization or biogenesis;GO:0007015//actin filament organization;GO:0030036//actin cytoskeleton organization;GO:0007010//cytoskeleton organization;GO:0016043//cellular component organization;GO:0006996//organelle organization;GO:0030029//actin filament-based process;GO:0043933//macromolecular complex subunit organization;GO:0009…
Unigene0049426	At1g54610	PREDICTED: probable serine/threonine-protein kinase At1g54610 [Ziziphus jujuba]	-	-	GO:0005488//binding;GO:0004672//protein kinase activity;GO:0016740//transferase activity;GO:0032549//ribonucleoside binding;GO:1901363//heterocyclic compound binding;GO:0001883//purine nucleoside binding;GO:0003824//catalytic activity;GO:0097367//carbohydrate derivative binding;GO:0016772//transferase activity, transferring phosphorus-containing groups;GO:0097159//organic cyclic compound binding;…	GO:0008152//metabolic process;GO:0044260//cellular macromolecule metabolic process;GO:0009987//cellular process;GO:0044267//cellular protein metabolic process;GO:0071704//organic substance metabolic process;GO:0006793//phosphorus metabolic process;GO:0043170//macromolecule metabolic process;GO:0044237//cellular metabolic process;GO:0006464//cellular protein modification process;GO:0019538//protei…
Unigene0049507	SPL15	PREDICTED: squamosa promoter-binding-like protein 14 [Nelumbo nucifera]	-	-	-	-
Unigene0049578	-	--	-	-	-	-
Unigene0049605	RPS29	40S ribosomal protein S29, partial [Dichanthelium oligosanthes]	ko03010//Ribosome//Translation//Genetic Information Processing	-	-	-
Unigene0049631	TBL2	PREDICTED: protein trichome birefringence-like 2 [Nelumbo nucifera]	-	-	-	-
Unigene0049687	CHY1	PREDICTED: 3-hydroxyisobutyryl-CoA hydrolase 1 [Prunus mume]	ko01100//Metabolic pathways//Global and Overview//Metabolism;ko01200//Carbon metabolism//Global and Overview//Metabolism;ko00410//beta-Alanine metabolism//Metabolism of other amino acids//Metabolism;ko00280//Valine, leucine and isoleucine degradation//Amino acid metabolism//Metabolism;ko00640//Propanoate metabolism//Carbohydrate metabolism//Metabolism	-	-	-
Unigene0049770	ATX1	PREDICTED: protein qua-1-like [Nelumbo nucifera]	-	-	-	-
Unigene0049886	RNFT1	PREDICTED: RING finger and transmembrane domain-containing protein 2 [Nelumbo nucifera]	-	-	-	-
Unigene0049920	Rrp36	PREDICTED: ribosomal RNA processing protein 36 homolog [Nelumbo nucifera]	-	-	-	-
Unigene0049927	ACLB-1	PREDICTED: ATP-citrate synthase beta chain protein 1 [Elaeis guineensis]	ko01100//Metabolic pathways//Global and Overview//Metabolism;ko01110//Biosynthesis of secondary metabolites//Global and Overview//Metabolism;ko01130//Biosynthesis of antibiotics//Global and Overview//Metabolism;ko01120//Microbial metabolism in diverse environments//Global and Overview//Metabolism;ko00020//Citrate cycle (TCA cycle)//Carbohydrate metabolism//Metabolism	-	-	-
Unigene0049954	At3g62120	PREDICTED: proline--tRNA ligase, cytoplasmic-like [Capsicum annuum]	ko00970//Aminoacyl-tRNA biosynthesis//Translation//Genetic Information Processing	-	-	-
Unigene0049990	PCMP-H58	PREDICTED: pentatricopeptide repeat-containing protein At5g50390, chloroplastic [Vitis vinifera]	-	-	-	-
Unigene0049993	At4g18820	PREDICTED: protein STICHEL-like 3 isoform X1 [Nelumbo nucifera]	-	-	-	-
Unigene0050052	At5g40240	PREDICTED: WAT1-related protein At3g28050-like [Juglans regia]	-	-	-	-
Unigene0050063	Dnajb2	DnaJ domain-containing protein [Cephalotus follicularis]	-	-	-	-
Unigene0050117	RAP2-4	PREDICTED: ethylene-responsive transcription factor RAP2-4-like [Nelumbo nucifera]	-	-	-	-
Unigene0050121	-	--	-	-	-	-
Unigene0050122	ALMT9	PREDICTED: aluminum-activated malate transporter 5-like [Phoenix dactylifera]	-	-	-	-
Unigene0050123	ALMT9	PREDICTED: aluminum-activated malate transporter 5-like [Phoenix dactylifera]	-	-	-	-
Unigene0050158	ELD1	PREDICTED: glycosyltransferase-like At2g41451 [Nelumbo nucifera]	-	-	-	-
Unigene0050160	ELD1	PREDICTED: glycosyltransferase-like KOBITO 1 [Vitis vinifera]	-	-	-	-
Unigene0050415	-	--	-	-	-	-
Unigene0050466	At1g77220	PREDICTED: protein LAZ1 homolog 1 isoform X1 [Vitis vinifera]	-	-	-	-
Unigene0050574	At1g76200	PREDICTED: NADH dehydrogenase [ubiquinone] 1 beta subcomplex subunit 2-like [Nelumbo nucifera]	-	GO:0005623//cell;GO:0005739//mitochondrion;GO:0043231//intracellular membrane-bounded organelle;GO:0044444//cytoplasmic part;GO:0019866//organelle inner membrane;GO:0044425//membrane part;GO:0044422//organelle part;GO:0043227//membrane-bounded organelle;GO:0044455//mitochondrial membrane part;GO:0031975//envelope;GO:0044429//mitochondrial part;GO:0031966//mitochondrial membrane;GO:0044424//intrac…	-	GO:0008152//metabolic process;GO:0044699//single-organism process;GO:0044710//single-organism metabolic process
Unigene0050600	tas	Protein tas, partial [Anthurium amnicola]	-	-	-	-
Unigene0050928	At1g64390	PREDICTED: endoglucanase 19 [Nelumbo nucifera]	-	-	-	-
Unigene0050955	At4g27520	plastocyanin-like domain protein [Medicago truncatula]	-	-	-	-
Unigene0050959	PHL1	PREDICTED: myb family transcription factor PHL7 isoform X1 [Vitis vinifera]	-	-	-	GO:0043170//macromolecule metabolic process;GO:0051179//localization;GO:0051641//cellular localization;GO:0044249//cellular biosynthetic process;GO:0051234//establishment of localization;GO:0044763//single-organism cellular process;GO:0071704//organic substance metabolic process;GO:0009058//biosynthetic process;GO:0044699//single-organism process;GO:0034645//cellular macromolecule biosynthetic pr…
Unigene0050961	PHL1	Myb_DNA-binding domain-containing protein/Myb_CC_LHEQLE domain-containing protein [Cephalotus follicularis]	-	-	-	-
Unigene0051017	-	PREDICTED: uncharacterized protein LOC100261386 isoform X1 [Vitis vinifera]	-	-	-	-
Unigene0051046	VCS	PREDICTED: enhancer of mRNA-decapping protein 4 [Nelumbo nucifera]	ko03018//RNA degradation//Folding, sorting and degradation//Genetic Information Processing	-	-	-
Unigene0051073	-	PREDICTED: uncharacterized protein LOC104597674 [Nelumbo nucifera]	-	-	-	-
Unigene0051264	TPIP1	triosephosphate isomerase [Petunia x hybrida]	ko01100//Metabolic pathways//Global and Overview//Metabolism;ko01110//Biosynthesis of secondary metabolites//Global and Overview//Metabolism;ko01130//Biosynthesis of antibiotics//Global and Overview//Metabolism;ko01120//Microbial metabolism in diverse environments//Global and Overview//Metabolism;ko01200//Carbon metabolism//Global and Overview//Metabolism;ko01230//Biosynthesis of amino acids//Glo…	-	GO:0016861//intramolecular oxidoreductase activity, interconverting aldoses and ketoses;GO:0016853//isomerase activity;GO:0016860//intramolecular oxidoreductase activity;GO:0003824//catalytic activity	GO:0044699//single-organism process;GO:0071704//organic substance metabolic process;GO:0006090//pyruvate metabolic process;GO:0044281//small molecule metabolic process;GO:0008152//metabolic process;GO:0019752//carboxylic acid metabolic process;GO:0044710//single-organism metabolic process;GO:0006082//organic acid metabolic process;GO:0043436//oxoacid metabolic process;GO:0044763//single-organism …
Unigene0051364	-	PREDICTED: Down syndrome critical region protein 3 homolog [Nelumbo nucifera]	-	GO:0012505//endomembrane system;GO:0005623//cell;GO:0044464//cell part	-	GO:0009648//photoperiodism;GO:0009416//response to light stimulus;GO:0009628//response to abiotic stimulus;GO:0009314//response to radiation;GO:0050896//response to stimulus
Unigene0051428	UGT89B1	PREDICTED: UDP-glycosyltransferase 89B2-like [Nelumbo nucifera]	-	-	GO:0003824//catalytic activity;GO:0016757//transferase activity, transferring glycosyl groups;GO:0016740//transferase activity	-
Unigene0051451	SUFE1	PREDICTED: sufE-like protein 1, chloroplastic/mitochondrial [Jatropha curcas]	-	-	-	-
Unigene0051525	OsI_01383	PREDICTED: glucosidase 2 subunit beta isoform X1 [Vitis vinifera]	ko04141//Protein processing in endoplasmic reticulum//Folding, sorting and degradation//Genetic Information Processing	-	-	GO:0044763//single-organism cellular process;GO:0071704//organic substance metabolic process;GO:0009058//biosynthetic process;GO:0008152//metabolic process;GO:0009987//cellular process;GO:0044249//cellular biosynthetic process;GO:0044710//single-organism metabolic process;GO:0044238//primary metabolic process;GO:1901576//organic substance biosynthetic process;GO:0044237//cellular metabolic proces…
Unigene0051557	-	Protein virilizer, partial [Corchorus capsularis]	-	-	-	-
Unigene0051575	NFS2	PREDICTED: cysteine desulfurase 1, chloroplastic [Nelumbo nucifera]	ko01100//Metabolic pathways//Global and Overview//Metabolism;ko00450//Selenocompound metabolism//Metabolism of other amino acids//Metabolism	GO:0009536//plastid;GO:0044444//cytoplasmic part;GO:0043227//membrane-bounded organelle;GO:0005623//cell;GO:0043231//intracellular membrane-bounded organelle;GO:0043226//organelle;GO:0005737//cytoplasm;GO:0005622//intracellular;GO:0043229//intracellular organelle;GO:0044424//intracellular part;GO:0044464//cell part	GO:0016783//sulfurtransferase activity;GO:0016829//lyase activity;GO:0016740//transferase activity;GO:0016846//carbon-sulfur lyase activity;GO:0043167//ion binding;GO:0016782//transferase activity, transferring sulfur-containing groups;GO:0005488//binding;GO:0043168//anion binding;GO:0003824//catalytic activity	GO:0006790//sulfur compound metabolic process;GO:0055080//cation homeostasis;GO:1901566//organonitrogen compound biosynthetic process;GO:0044699//single-organism process;GO:0006082//organic acid metabolic process;GO:0009058//biosynthetic process;GO:0000096//sulfur amino acid metabolic process;GO:0016043//cellular component organization;GO:1901576//organic substance biosynthetic process;GO:0044237…
Unigene0051576	NFS2	PREDICTED: cysteine desulfurase 1, chloroplastic isoform X2 [Vigna angularis]	ko01100//Metabolic pathways//Global and Overview//Metabolism;ko00450//Selenocompound metabolism//Metabolism of other amino acids//Metabolism	-	GO:0016829//lyase activity;GO:0003824//catalytic activity;GO:0016740//transferase activity;GO:0005488//binding;GO:0043167//ion binding;GO:0043168//anion binding;GO:0016782//transferase activity, transferring sulfur-containing groups;GO:0016783//sulfurtransferase activity;GO:0016846//carbon-sulfur lyase activity	GO:0043436//oxoacid metabolic process;GO:0006807//nitrogen compound metabolic process;GO:0044699//single-organism process;GO:0000096//sulfur amino acid metabolic process;GO:1901564//organonitrogen compound metabolic process;GO:0044237//cellular metabolic process;GO:0008152//metabolic process;GO:0019752//carboxylic acid metabolic process;GO:0044238//primary metabolic process;GO:0044763//single-org…
Unigene0051664	CRK42	PREDICTED: cysteine-rich receptor-like protein kinase 42 [Nelumbo nucifera]	-	GO:0016020//membrane	GO:0004672//protein kinase activity;GO:0003824//catalytic activity;GO:0016773//phosphotransferase activity, alcohol group as acceptor;GO:0016740//transferase activity;GO:0016301//kinase activity;GO:0016772//transferase activity, transferring phosphorus-containing groups	GO:0006793//phosphorus metabolic process;GO:0006796//phosphate-containing compound metabolic process;GO:0044237//cellular metabolic process;GO:0009987//cellular process;GO:0008152//metabolic process
Unigene0051720	RD21A	PREDICTED: low-temperature-induced cysteine proteinase [Vitis vinifera]	-	-	GO:0016787//hydrolase activity;GO:0070011//peptidase activity, acting on L-amino acid peptides;GO:0003824//catalytic activity;GO:0008233//peptidase activity	-
Unigene0051738	At4g28100	PREDICTED: uncharacterized GPI-anchored protein At4g28100 [Vitis vinifera]	-	GO:0044425//membrane part;GO:0031225//anchored component of membrane;GO:0016020//membrane;GO:0031224//intrinsic component of membrane	-	-
Unigene0051739	VIL2	PREDICTED: protein VERNALIZATION INSENSITIVE 3 isoform X1 [Phoenix dactylifera]	-	-	-	-
Unigene0051767	DRT100	PREDICTED: DNA-damage-repair/toleration protein DRT100 [Phoenix dactylifera]	-	-	-	-
Unigene0051797	NUP133	PREDICTED: nuclear pore complex protein NUP133 [Nelumbo nucifera]	ko03013//RNA transport//Translation//Genetic Information Processing	-	-	-
Unigene0051833	At3g01270	PREDICTED: probable pectate lyase P59 [Juglans regia]	ko00040//Pentose and glucuronate interconversions//Carbohydrate metabolism//Metabolism	-	GO:0003824//catalytic activity;GO:0043169//cation binding;GO:0016837//carbon-oxygen lyase activity, acting on polysaccharides;GO:0016835//carbon-oxygen lyase activity;GO:0005488//binding;GO:0016829//lyase activity;GO:0043167//ion binding	GO:0008152//metabolic process;GO:0000272//polysaccharide catabolic process;GO:0016052//carbohydrate catabolic process;GO:0005976//polysaccharide metabolic process;GO:1901575//organic substance catabolic process;GO:0043170//macromolecule metabolic process;GO:0005975//carbohydrate metabolic process;GO:0009056//catabolic process;GO:0044238//primary metabolic process;GO:0009057//macromolecule catabol…
Unigene0051938	At3g52030	PREDICTED: F-box/WD-40 repeat-containing protein At3g52030 [Nelumbo nucifera]	-	-	-	-
Unigene0051963	-	PREDICTED: uncharacterized protein LOC100258835 isoform X1 [Vitis vinifera]	-	-	-	-
Unigene0051964	-	PREDICTED: uncharacterized protein LOC105045577 isoform X3 [Elaeis guineensis]	-	-	-	-
Unigene0052006	AHL10	PREDICTED: AT-hook motif nuclear-localized protein 14 [Nelumbo nucifera]	-	-	-	-
Unigene0052105	TSB	PREDICTED: tryptophan synthase beta chain 1 [Nelumbo nucifera]	ko01100//Metabolic pathways//Global and Overview//Metabolism;ko01110//Biosynthesis of secondary metabolites//Global and Overview//Metabolism;ko01130//Biosynthesis of antibiotics//Global and Overview//Metabolism;ko01230//Biosynthesis of amino acids//Global and Overview//Metabolism;ko00260//Glycine, serine and threonine metabolism//Amino acid metabolism//Metabolism;ko00400//Phenylalanine, tyrosine …	-	-	-
Unigene0052119	exosc6	PREDICTED: exosome complex component RRP41-like isoform X1 [Nelumbo nucifera]	ko03018//RNA degradation//Folding, sorting and degradation//Genetic Information Processing	GO:0005623//cell;GO:0044424//intracellular part;GO:0005622//intracellular;GO:0044464//cell part	GO:0016787//hydrolase activity;GO:0016788//hydrolase activity, acting on ester bonds;GO:0004527//exonuclease activity;GO:0003824//catalytic activity;GO:0004518//nuclease activity	GO:0016569//covalent chromatin modification;GO:0071840//cellular component organization or biogenesis;GO:0048580//regulation of post-embryonic development;GO:0044710//single-organism metabolic process;GO:0043414//macromolecule methylation;GO:0016570//histone modification;GO:0090304//nucleic acid metabolic process;GO:0000003//reproduction;GO:0009987//cellular process;GO:0016568//chromatin modifica…
Unigene0052201	-	transmembrane protein [Medicago truncatula]	-	-	-	-
Unigene0052215	-	PREDICTED: zinc finger CCCH domain-containing protein 13 [Nelumbo nucifera]	-	-	-	-
Unigene0052231	DRT102	PREDICTED: DNA-damage-repair/toleration protein DRT102 [Nelumbo nucifera]	-	-	-	-
Unigene0052327	fusA2	PREDICTED: elongation factor G-2, chloroplastic-like [Phoenix dactylifera]	-	GO:0044464//cell part;GO:0005623//cell	GO:1901363//heterocyclic compound binding;GO:0005488//binding;GO:0001882//nucleoside binding;GO:0016787//hydrolase activity;GO:0032549//ribonucleoside binding;GO:0032550//purine ribonucleoside binding;GO:0003824//catalytic activity;GO:0036094//small molecule binding;GO:0016462//pyrophosphatase activity;GO:0008135//translation factor activity, RNA binding;GO:0097367//carbohydrate derivative bindin…	GO:1901576//organic substance biosynthetic process;GO:0009058//biosynthetic process;GO:0043170//macromolecule metabolic process;GO:0034645//cellular macromolecule biosynthetic process;GO:0071704//organic substance metabolic process;GO:0009987//cellular process;GO:0044260//cellular macromolecule metabolic process;GO:0044249//cellular biosynthetic process;GO:0009059//macromolecule biosynthetic proc…
Unigene0052368	LARP1C	PREDICTED: la-related protein 1C-like isoform X1 [Nelumbo nucifera]	-	-	-	-
Unigene0052436	TIR1	PREDICTED: protein TRANSPORT INHIBITOR RESPONSE 1-like [Nelumbo nucifera]	ko04075//Plant hormone signal transduction//Signal transduction//Environmental Information Processing	-	-	GO:0009719//response to endogenous stimulus;GO:0009755//hormone-mediated signaling pathway;GO:0007165//signal transduction;GO:0050789//regulation of biological process;GO:0070887//cellular response to chemical stimulus;GO:0042221//response to chemical;GO:0009725//response to hormone;GO:0007154//cell communication;GO:0044763//single-organism cellular process;GO:0051716//cellular response to stimul…
Unigene0052437	TIR1	PREDICTED: protein TRANSPORT INHIBITOR RESPONSE 1-like [Sesamum indicum]	ko04075//Plant hormone signal transduction//Signal transduction//Environmental Information Processing	-	-	-
Unigene0052495	bcsl1b	PREDICTED: AAA-ATPase ASD, mitochondrial-like [Citrus sinensis]	-	-	GO:0036094//small molecule binding;GO:0097367//carbohydrate derivative binding;GO:0097159//organic cyclic compound binding;GO:0032550//purine ribonucleoside binding;GO:0001883//purine nucleoside binding;GO:1901363//heterocyclic compound binding;GO:0005488//binding;GO:0001882//nucleoside binding;GO:0032549//ribonucleoside binding	-
Unigene0052532	-	PREDICTED: protein BONZAI 1-like [Phoenix dactylifera]	-	-	-	-
Unigene0052620	G3bp1	PREDICTED: ras GTPase-activating protein-binding protein 2 isoform X1 [Nelumbo nucifera]	-	-	-	-
Unigene0052626	Ddx59	P-loop containing nucleoside triphosphate hydrolases superfamily protein isoform 1 [Theobroma cacao]	-	-	-	-
Unigene0052695	PQL3	Histone H2A deubiquitinase MYSM1 [Anthurium amnicola]	-	-	-	-
Unigene0052763	Tbl3	PREDICTED: transducin beta-like protein 3 [Nelumbo nucifera]	ko03008//Ribosome biogenesis in eukaryotes//Translation//Genetic Information Processing	GO:0030529//intracellular ribonucleoprotein complex;GO:0043226//organelle;GO:0043229//intracellular organelle;GO:0032991//macromolecular complex;GO:0043228//non-membrane-bounded organelle;GO:0005623//cell;GO:0030684//preribosome;GO:0044464//cell part;GO:0005622//intracellular;GO:1990904//ribonucleoprotein complex;GO:0044424//intracellular part;GO:0043232//intracellular non-membrane-bounded organe…	GO:0004674//protein serine/threonine kinase activity;GO:0003824//catalytic activity;GO:0016301//kinase activity;GO:0004683//calmodulin-dependent protein kinase activity;GO:0004672//protein kinase activity;GO:0016773//phosphotransferase activity, alcohol group as acceptor;GO:0016740//transferase activity;GO:0016772//transferase activity, transferring phosphorus-containing groups	GO:0015931//nucleobase-containing compound transport;GO:0007154//cell communication;GO:0009639//response to red or far red light;GO:0019538//protein metabolic process;GO:0008152//metabolic process;GO:0044702//single organism reproductive process;GO:0009416//response to light stimulus;GO:0065007//biological regulation;GO:0007275//multicellular organism development;GO:0044267//cellular protein meta…
Unigene0052777	SOD	PREDICTED: superoxide dismutase [Mn], mitochondrial [Gossypium hirsutum]	ko04146//Peroxisome//Transport and catabolism//Cellular Processes	-	GO:0043167//ion binding;GO:0043169//cation binding;GO:0003824//catalytic activity;GO:0005488//binding	GO:0009987//cellular process;GO:0044237//cellular metabolic process;GO:0072593//reactive oxygen species metabolic process;GO:0044710//single-organism metabolic process;GO:0006801//superoxide metabolic process;GO:0008152//metabolic process;GO:0044699//single-organism process
Unigene0052810	VIT_19s0014g03930	PREDICTED: tRNA (guanine(37)-N1)-methyltransferase 1 isoform X1 [Nelumbo nucifera]	-	-	-	-
Unigene0052847	FLA17	PREDICTED: LOW QUALITY PROTEIN: fasciclin-like arabinogalactan protein 17 [Phoenix dactylifera]	-	-	-	-
Unigene0052890	At1g64390	PREDICTED: endoglucanase 19 [Nelumbo nucifera]	-	-	-	-
Unigene0053033	-	PREDICTED: probable inactive ATP-dependent zinc metalloprotease FTSHI 1, chloroplastic [Nelumbo nucifera]	-	-	GO:0016787//hydrolase activity;GO:0003824//catalytic activity	-
Unigene0053036	ftsH	PREDICTED: probable inactive ATP-dependent zinc metalloprotease FTSHI 1, chloroplastic [Nelumbo nucifera]	-	-	-	-
Unigene0053038	RECA	PREDICTED: DNA repair protein recA homolog 1, chloroplastic isoform X1 [Phoenix dactylifera]	ko03440//Homologous recombination//Replication and repair//Genetic Information Processing	GO:0009536//plastid;GO:0005737//cytoplasm;GO:0044446//intracellular organelle part;GO:0043226//organelle;GO:0005623//cell;GO:0044444//cytoplasmic part;GO:0005622//intracellular;GO:0009532//plastid stroma;GO:0043231//intracellular membrane-bounded organelle;GO:0044424//intracellular part;GO:0043229//intracellular organelle;GO:0043227//membrane-bounded organelle;GO:0044422//organelle part;GO:004446…	GO:0097367//carbohydrate derivative binding;GO:0016462//pyrophosphatase activity;GO:0005488//binding;GO:0001882//nucleoside binding;GO:0017111//nucleoside-triphosphatase activity;GO:0097159//organic cyclic compound binding;GO:0016818//hydrolase activity, acting on acid anhydrides, in phosphorus-containing anhydrides;GO:0003677//DNA binding;GO:0016787//hydrolase activity;GO:0001883//purine nucleos…	GO:0065008//regulation of biological quality;GO:0034641//cellular nitrogen compound metabolic process;GO:0050896//response to stimulus;GO:0006725//cellular aromatic compound metabolic process;GO:0022402//cell cycle process;GO:0009690//cytokinin metabolic process;GO:0051716//cellular response to stimulus;GO:0008152//metabolic process;GO:0046483//heterocycle metabolic process;GO:0090304//nucleic ac…
Unigene0053063	At2g18620	chloroplast heterodimeric geranylgeranyl pyrophosphate synthase small subunit [Paeonia lactiflora]	ko01100//Metabolic pathways//Global and Overview//Metabolism;ko01110//Biosynthesis of secondary metabolites//Global and Overview//Metabolism;ko01130//Biosynthesis of antibiotics//Global and Overview//Metabolism;ko00900//Terpenoid backbone biosynthesis//Metabolism of terpenoids and polyketides//Metabolism	-	-	-
Unigene0053195	CYCH1-1	PREDICTED: cyclin-H1-1 isoform X1 [Nelumbo nucifera]	ko03420//Nucleotide excision repair//Replication and repair//Genetic Information Processing;ko03022//Basal transcription factors//Transcription//Genetic Information Processing	GO:0005623//cell;GO:0005622//intracellular;GO:0044428//nuclear part;GO:0043229//intracellular organelle;GO:0044422//organelle part;GO:0005634//nucleus;GO:0044446//intracellular organelle part;GO:0044451//nucleoplasm part;GO:0043226//organelle;GO:0043231//intracellular membrane-bounded organelle;GO:0005654//nucleoplasm;GO:0044464//cell part;GO:0031981//nuclear lumen;GO:0043227//membrane-bounded or…	GO:0098772//molecular function regulator;GO:0005515//protein binding;GO:0019207//kinase regulator activity;GO:0019899//enzyme binding;GO:0016301//kinase activity;GO:0003824//catalytic activity;GO:0005488//binding;GO:0019900//kinase binding;GO:0016772//transferase activity, transferring phosphorus-containing groups;GO:0019887//protein kinase regulator activity;GO:0016740//transferase activity;GO:0…	GO:0016070//RNA metabolic process;GO:0001932//regulation of protein phosphorylation;GO:0009415//response to water;GO:0007275//multicellular organism development;GO:0050789//regulation of biological process;GO:0008380//RNA splicing;GO:0009058//biosynthetic process;GO:0010035//response to inorganic substance;GO:0080090//regulation of primary metabolic process;GO:0044699//single-organism process;GO:…
Unigene0053235	ARAD1	probable arabinosyltransferase ARAD1 [Ananas comosus]	-	-	-	-
Unigene0053256	DOT2	PREDICTED: SART-1 family protein DOT2 [Vitis vinifera]	ko03040//Spliceosome//Transcription//Genetic Information Processing	-	-	-
Unigene0053284	SMU2	PREDICTED: suppressor of mec-8 and unc-52 protein homolog 2 [Nelumbo nucifera]	-	-	-	GO:0044260//cellular macromolecule metabolic process;GO:0090304//nucleic acid metabolic process;GO:0009987//cellular process;GO:0008152//metabolic process;GO:1901360//organic cyclic compound metabolic process;GO:0010467//gene expression;GO:0044238//primary metabolic process;GO:0006139//nucleobase-containing compound metabolic process;GO:0046483//heterocycle metabolic process;GO:0044237//cellular …
Unigene0053325	CYCD3-1	PREDICTED: cyclin-D2-1 [Prunus mume]	-	-	-	-
Unigene0053343	At1g17710	PREDICTED: inorganic pyrophosphatase 1 [Nelumbo nucifera]	ko01100//Metabolic pathways//Global and Overview//Metabolism;ko00750//Vitamin B6 metabolism//Metabolism of cofactors and vitamins//Metabolism	-	GO:0003824//catalytic activity;GO:0042578//phosphoric ester hydrolase activity;GO:0016788//hydrolase activity, acting on ester bonds;GO:0016787//hydrolase activity	GO:0006796//phosphate-containing compound metabolic process;GO:0006793//phosphorus metabolic process;GO:0044237//cellular metabolic process;GO:0009987//cellular process;GO:0008152//metabolic process
Unigene0053344	At1g17710	PREDICTED: inorganic pyrophosphatase 1 [Nelumbo nucifera]	ko01100//Metabolic pathways//Global and Overview//Metabolism;ko00750//Vitamin B6 metabolism//Metabolism of cofactors and vitamins//Metabolism	-	GO:0016788//hydrolase activity, acting on ester bonds;GO:0042578//phosphoric ester hydrolase activity;GO:0003824//catalytic activity;GO:0016787//hydrolase activity	GO:0006793//phosphorus metabolic process;GO:0044237//cellular metabolic process;GO:0009987//cellular process;GO:0008152//metabolic process;GO:0006796//phosphate-containing compound metabolic process
Unigene0053382	At4g18375	PREDICTED: KH domain-containing protein At4g18375 [Elaeis guineensis]	-	-	GO:0003676//nucleic acid binding;GO:1901363//heterocyclic compound binding;GO:0005488//binding;GO:0097159//organic cyclic compound binding	-
Unigene0053481	RAC7	PREDICTED: rac-like GTP-binding protein 5 [Nelumbo nucifera]	ko04145//Phagosome//Transport and catabolism//Cellular Processes	-	-	-
Unigene0053491	PRS3	PREDICTED: ribose-phosphate pyrophosphokinase 4 isoform X1 [Nelumbo nucifera]	-	-	-	-
Unigene0053514	GK-2	PREDICTED: guanylate kinase 2-like [Nelumbo nucifera]	ko01100//Metabolic pathways//Global and Overview//Metabolism;ko00230//Purine metabolism//Nucleotide metabolism//Metabolism	-	GO:0016740//transferase activity;GO:0003824//catalytic activity;GO:0016772//transferase activity, transferring phosphorus-containing groups	GO:0008152//metabolic process;GO:0006796//phosphate-containing compound metabolic process;GO:0019637//organophosphate metabolic process;GO:0006793//phosphorus metabolic process;GO:0044699//single-organism process;GO:0044710//single-organism metabolic process;GO:0009117//nucleotide metabolic process;GO:0006725//cellular aromatic compound metabolic process;GO:0006807//nitrogen compound metabolic pr…
Unigene0053515	-	--	-	-	-	-
Unigene0053557	PF13_0198	PREDICTED: histone-lysine N-methyltransferase, H3 lysine-79 specific-like isoform X1 [Gossypium raimondii]	-	-	-	-
Unigene0053575	-	PREDICTED: uncharacterized protein LOC104595572 [Nelumbo nucifera]	-	-	-	-
Unigene0053625	OMR1	PREDICTED: threonine dehydratase biosynthetic, chloroplastic [Phoenix dactylifera]	ko01100//Metabolic pathways//Global and Overview//Metabolism;ko01110//Biosynthesis of secondary metabolites//Global and Overview//Metabolism;ko01130//Biosynthesis of antibiotics//Global and Overview//Metabolism;ko01200//Carbon metabolism//Global and Overview//Metabolism;ko01230//Biosynthesis of amino acids//Global and Overview//Metabolism;ko00260//Glycine, serine and threonine metabolism//Amino a…	GO:0044424//intracellular part;GO:0043226//organelle;GO:0043231//intracellular membrane-bounded organelle;GO:0005623//cell;GO:0005622//intracellular;GO:0009536//plastid;GO:0005737//cytoplasm;GO:0044464//cell part;GO:0043227//membrane-bounded organelle;GO:0043229//intracellular organelle;GO:0044444//cytoplasmic part	GO:0016829//lyase activity;GO:0043168//anion binding;GO:0016841//ammonia-lyase activity;GO:0016840//carbon-nitrogen lyase activity;GO:0043167//ion binding;GO:0003824//catalytic activity;GO:0005488//binding	GO:0006549//isoleucine metabolic process;GO:0044711//single-organism biosynthetic process;GO:0030163//protein catabolic process;GO:0044699//single-organism process;GO:0044710//single-organism metabolic process;GO:0044763//single-organism cellular process;GO:0044257//cellular protein catabolic process;GO:0044281//small molecule metabolic process;GO:0044238//primary metabolic process;GO:0006082//or…
Unigene0053629	SARED1	Sanguinarine reductase, partial [Ananas comosus]	-	-	-	-
Unigene0053646	OBF1	PREDICTED: bZIP transcription factor 11-like [Nelumbo nucifera]	-	-	-	-
Unigene0053647	IQD1	PREDICTED: protein IQ-DOMAIN 1 isoform X1 [Nelumbo nucifera]	-	-	-	-
Unigene0053710	RPL24	60S ribosomal L24 [Gossypium arboreum]	ko03010//Ribosome//Translation//Genetic Information Processing	-	-	-
Unigene0053739	-	PREDICTED: auxin-repressed 12.5 kDa protein [Nelumbo nucifera]	-	-	-	-
Unigene0053757	MYB108	PREDICTED: transcription factor MYB108-like [Nelumbo nucifera]	-	-	-	-
Unigene0053760	ASHR2	PREDICTED: histone-lysine N-methyltransferase ASHR2 [Phoenix dactylifera]	-	-	GO:0016740//transferase activity;GO:0003824//catalytic activity	-
Unigene0053809	44441	PREDICTED: developmental protein SEPALLATA 1 [Nelumbo nucifera]	-	GO:0044424//intracellular part;GO:0043231//intracellular membrane-bounded organelle;GO:0043229//intracellular organelle;GO:0044464//cell part;GO:0043226//organelle;GO:0005622//intracellular;GO:0005623//cell;GO:0043227//membrane-bounded organelle	GO:0016628//oxidoreductase activity, acting on the CH-CH group of donors, NAD or NADP as acceptor;GO:0005488//binding;GO:0001071//nucleic acid binding transcription factor activity;GO:0016627//oxidoreductase activity, acting on the CH-CH group of donors;GO:0003824//catalytic activity;GO:0005515//protein binding;GO:0016491//oxidoreductase activity	GO:0010468//regulation of gene expression;GO:0008152//metabolic process;GO:0019222//regulation of metabolic process;GO:0065007//biological regulation;GO:0009059//macromolecule biosynthetic process;GO:0043170//macromolecule metabolic process;GO:0050789//regulation of biological process;GO:0044260//cellular macromolecule metabolic process;GO:0044249//cellular biosynthetic process;GO:0034645//cellul…
Unigene0053837	-	PREDICTED: uncharacterized protein LOC104611801 [Nelumbo nucifera]	-	-	-	-
Unigene0053839	TSJT1	PREDICTED: stem-specific protein TSJT1 [Amborella trichopoda]	-	GO:0005623//cell;GO:0016020//membrane;GO:0005622//intracellular;GO:0044464//cell part;GO:0044424//intracellular part	-	GO:0010035//response to inorganic substance;GO:0050896//response to stimulus;GO:0009725//response to hormone;GO:0042221//response to chemical;GO:0010038//response to metal ion;GO:0010033//response to organic substance;GO:0009719//response to endogenous stimulus
Unigene0053933	-	PREDICTED: formin-1 isoform X1 [Sesamum indicum]	-	GO:0005623//cell;GO:0005622//intracellular;GO:0044464//cell part;GO:0044424//intracellular part	GO:0005488//binding	-
Unigene0054017	Os05g0428700	PREDICTED: potassium channel AKT2 [Elaeis guineensis]	-	GO:0016020//membrane	-	GO:0009987//cellular process;GO:0044763//single-organism cellular process;GO:0006810//transport;GO:0055085//transmembrane transport;GO:0006811//ion transport;GO:1902578//single-organism localization;GO:0051179//localization;GO:0034220//ion transmembrane transport;GO:0051234//establishment of localization;GO:0044699//single-organism process;GO:0044765//single-organism transport;GO:0030001//metal i…
Unigene0054035	APS3	PREDICTED: ATP sulfurylase 1, chloroplastic [Nelumbo nucifera]	ko01100//Metabolic pathways//Global and Overview//Metabolism;ko01130//Biosynthesis of antibiotics//Global and Overview//Metabolism;ko01120//Microbial metabolism in diverse environments//Global and Overview//Metabolism;ko00230//Purine metabolism//Nucleotide metabolism//Metabolism;ko00920//Sulfur metabolism//Energy metabolism//Metabolism;ko00450//Selenocompound metabolism//Metabolism of other amino…	-	GO:0016740//transferase activity;GO:0070566//adenylyltransferase activity;GO:0016779//nucleotidyltransferase activity;GO:0016772//transferase activity, transferring phosphorus-containing groups;GO:0003824//catalytic activity;GO:0004779//sulfate adenylyltransferase activity	-
Unigene0054076	GL2	PREDICTED: homeobox-leucine zipper protein GLABRA 2-like [Nelumbo nucifera]	-	GO:0043227//membrane-bounded organelle;GO:0005622//intracellular;GO:0005623//cell;GO:0044424//intracellular part;GO:0044464//cell part;GO:0043226//organelle;GO:0043231//intracellular membrane-bounded organelle;GO:0043229//intracellular organelle	GO:0003677//DNA binding;GO:0097159//organic cyclic compound binding;GO:0003676//nucleic acid binding;GO:1901363//heterocyclic compound binding;GO:0005488//binding	GO:0065007//biological regulation;GO:0010468//regulation of gene expression;GO:0019222//regulation of metabolic process;GO:0060255//regulation of macromolecule metabolic process;GO:0050789//regulation of biological process
Unigene0054119	YMR099C	Galactose mutarotase-like superfamily protein isoform 1 [Theobroma cacao]	ko01100//Metabolic pathways//Global and Overview//Metabolism;ko01110//Biosynthesis of secondary metabolites//Global and Overview//Metabolism;ko01130//Biosynthesis of antibiotics//Global and Overview//Metabolism;ko01120//Microbial metabolism in diverse environments//Global and Overview//Metabolism;ko00010//Glycolysis / Gluconeogenesis//Carbohydrate metabolism//Metabolism	-	GO:0005488//binding;GO:0003824//catalytic activity	GO:0044238//primary metabolic process;GO:0008152//metabolic process
Unigene0054130	PCMP-H33	PREDICTED: pentatricopeptide repeat-containing protein At1g08070, chloroplastic-like [Nelumbo nucifera]	-	-	-	-
Unigene0054197	-	--	-	-	-	-
Unigene0054257	PHIP	PREDICTED: bromodomain and WD repeat-containing protein 1 [Nelumbo nucifera]	-	-	-	-
Unigene0054271	RhGT1	PREDICTED: UDP-glycosyltransferase 88B1-like [Nelumbo nucifera]	-	-	-	-
Unigene0054369	At1g21890	PREDICTED: WAT1-related protein At1g21890-like [Nelumbo nucifera]	-	GO:0044425//membrane part;GO:0016020//membrane;GO:0031224//intrinsic component of membrane	GO:0005215//transporter activity	GO:0044699//single-organism process;GO:0009987//cellular process;GO:0044763//single-organism cellular process
Unigene0054395	-	PLATZ transcription factor family protein [Medicago truncatula]	-	-	-	-
Unigene0054417	RPN2A	PREDICTED: 26S proteasome non-ATPase regulatory subunit 1 homolog A [Vitis vinifera]	ko03050//Proteasome//Folding, sorting and degradation//Genetic Information Processing	-	-	-
Unigene0054428	At1g76660	PREDICTED: uncharacterized protein At1g76660 [Nelumbo nucifera]	-	-	-	-
Unigene0054450	Os05g0200100	PREDICTED: thioredoxin-like 2, chloroplastic [Malus domestica]	-	-	-	GO:0044699//single-organism process
Unigene0054515	TT12	PREDICTED: protein DETOXIFICATION 20-like [Nelumbo nucifera]	-	GO:0031224//intrinsic component of membrane;GO:0044425//membrane part;GO:0016020//membrane	GO:0022857//transmembrane transporter activity;GO:0015291//secondary active transmembrane transporter activity;GO:0022804//active transmembrane transporter activity;GO:0005215//transporter activity	GO:0044699//single-organism process;GO:0044763//single-organism cellular process;GO:0009987//cellular process
Unigene0054516	-	--	-	-	-	-
Unigene0054523	TBR	PREDICTED: protein trichome birefringence [Elaeis guineensis]	-	-	-	-
Unigene0054554	pof4	PREDICTED: transcription elongation factor B polypeptide 3 [Musa acuminata subsp. malaccensis] [Musa acuminata]	-	-	-	-
Unigene0054592	NUDT16	PREDICTED: nudix hydrolase 16, mitochondrial isoform X1 [Elaeis guineensis]	-	-	-	-
Unigene0054625	-	PREDICTED: serine/arginine repetitive matrix protein 1-like [Nelumbo nucifera]	-	-	-	-
Unigene0054668	-	--	-	-	-	-
Unigene0054762	TMN8	PREDICTED: transmembrane 9 superfamily member 8-like [Nelumbo nucifera]	-	GO:0016020//membrane;GO:0044425//membrane part;GO:0031224//intrinsic component of membrane	-	GO:0009059//macromolecule biosynthetic process;GO:0006497//protein lipidation;GO:0044238//primary metabolic process;GO:0036211//protein modification process;GO:0008152//metabolic process;GO:0044237//cellular metabolic process;GO:1901576//organic substance biosynthetic process;GO:0042158//lipoprotein biosynthetic process;GO:0044267//cellular protein metabolic process;GO:0071704//organic substance …
Unigene0054827	DDB_G0276461	PREDICTED: probable serine/threonine-protein kinase DDB_G0280111 isoform X2 [Nelumbo nucifera]	-	-	-	-
Unigene0054828	AAK1	PREDICTED: probable serine/threonine-protein kinase DDB_G0280111 isoform X2 [Nelumbo nucifera]	-	-	GO:0016772//transferase activity, transferring phosphorus-containing groups;GO:0003824//catalytic activity;GO:0016740//transferase activity	-
Unigene0054864	-	Phosphatidylcholine transfer protein, partial [Anthurium amnicola]	-	-	-	-
Unigene0054865	Stard7	Polyketide cyclase/dehydrase and lipid transport superfamily protein [Theobroma cacao]	-	-	GO:0005488//binding	-
Unigene0054879	ATHB-15	PREDICTED: homeobox-leucine zipper protein ATHB-15-like [Nelumbo nucifera]	-	GO:0043229//intracellular organelle;GO:0043231//intracellular membrane-bounded organelle;GO:0043226//organelle;GO:0005623//cell;GO:0044424//intracellular part;GO:0005622//intracellular;GO:0044464//cell part;GO:0043227//membrane-bounded organelle	GO:0003676//nucleic acid binding;GO:0001071//nucleic acid binding transcription factor activity;GO:0003677//DNA binding;GO:1901363//heterocyclic compound binding;GO:0097159//organic cyclic compound binding;GO:0005488//binding	GO:0048869//cellular developmental process;GO:0006950//response to stress;GO:0071840//cellular component organization or biogenesis;GO:1902589//single-organism organelle organization;GO:0030036//actin cytoskeleton organization;GO:0007015//actin filament organization;GO:0000902//cell morphogenesis;GO:0022622//root system development;GO:0009943//adaxial/abaxial axis specification;GO:0048513//animal…
Unigene0054907	-	PREDICTED: protein ANTI-SILENCING 1-like [Nelumbo nucifera]	-	-	-	-
Unigene0054987	AAPT1	PREDICTED: choline/ethanolaminephosphotransferase 1 [Ziziphus jujuba]	ko01100//Metabolic pathways//Global and Overview//Metabolism;ko01110//Biosynthesis of secondary metabolites//Global and Overview//Metabolism;ko00564//Glycerophospholipid metabolism//Lipid metabolism//Metabolism;ko00565//Ether lipid metabolism//Lipid metabolism//Metabolism	-	GO:0016740//transferase activity;GO:0003824//catalytic activity;GO:0016772//transferase activity, transferring phosphorus-containing groups	-
Unigene0054988	AAPT1	PREDICTED: choline/ethanolaminephosphotransferase 1 isoform X2 [Elaeis guineensis]	ko01100//Metabolic pathways//Global and Overview//Metabolism;ko01110//Biosynthesis of secondary metabolites//Global and Overview//Metabolism;ko00564//Glycerophospholipid metabolism//Lipid metabolism//Metabolism;ko00565//Ether lipid metabolism//Lipid metabolism//Metabolism	-	GO:0003824//catalytic activity;GO:0016740//transferase activity;GO:0016772//transferase activity, transferring phosphorus-containing groups	-
Unigene0054989	AAPT1	PREDICTED: choline/ethanolaminephosphotransferase 1 isoform X2 [Elaeis guineensis]	ko01100//Metabolic pathways//Global and Overview//Metabolism;ko01110//Biosynthesis of secondary metabolites//Global and Overview//Metabolism;ko00564//Glycerophospholipid metabolism//Lipid metabolism//Metabolism;ko00565//Ether lipid metabolism//Lipid metabolism//Metabolism	-	GO:0016740//transferase activity;GO:0003824//catalytic activity;GO:0016772//transferase activity, transferring phosphorus-containing groups	-
Unigene0055068	SPBC23E6.02	PREDICTED: helicase-like transcription factor CHR28 [Vitis vinifera]	-	-	-	-
Unigene0055085	-	--	-	-	-	-
Unigene0055171	-	UBA domain-containing protein [Cephalotus follicularis]	-	-	-	-
Unigene0055196	At3g01520	PREDICTED: universal stress protein PHOS32 [Phoenix dactylifera]	-	-	-	-
Unigene0055220	-	--	-	-	-	-
Unigene0055337	-	--	-	-	-	-
Unigene0055356	RABA1F	PREDICTED: ras-related protein RABA1f [Vitis vinifera]	ko04144//Endocytosis//Transport and catabolism//Cellular Processes	-	GO:0032550//purine ribonucleoside binding;GO:1901363//heterocyclic compound binding;GO:0005488//binding;GO:0097367//carbohydrate derivative binding;GO:0001883//purine nucleoside binding;GO:0001882//nucleoside binding;GO:0032549//ribonucleoside binding;GO:0036094//small molecule binding;GO:0097159//organic cyclic compound binding	GO:0035556//intracellular signal transduction;GO:0065007//biological regulation;GO:0007165//signal transduction;GO:0050794//regulation of cellular process;GO:0044699//single-organism process;GO:0044763//single-organism cellular process;GO:0007154//cell communication;GO:0033036//macromolecule localization;GO:0051179//localization;GO:0044700//single organism signaling;GO:0023052//signaling;GO:00517…
Unigene0055483	-	PREDICTED: desiccation-related protein PCC13-62 isoform X1 [Elaeis guineensis]	-	-	-	-
Unigene0055488	UBP14	PREDICTED: ubiquitin carboxyl-terminal hydrolase 14 isoform X1 [Nelumbo nucifera]	-	GO:0044464//cell part;GO:0005623//cell;GO:0005622//intracellular;GO:0005737//cytoplasm;GO:0044424//intracellular part;GO:0044444//cytoplasmic part	GO:0043169//cation binding;GO:0003824//catalytic activity;GO:0016787//hydrolase activity;GO:0043167//ion binding;GO:0070011//peptidase activity, acting on L-amino acid peptides;GO:0046872//metal ion binding;GO:0046914//transition metal ion binding;GO:0008238//exopeptidase activity;GO:0005488//binding;GO:0008233//peptidase activity	GO:0070646//protein modification by small protein removal;GO:0016049//cell growth;GO:0044767//single-organism developmental process;GO:0048869//cellular developmental process;GO:0044238//primary metabolic process;GO:0009987//cellular process;GO:1901575//organic substance catabolic process;GO:0043412//macromolecule modification;GO:0040007//growth;GO:0048588//developmental cell growth;GO:0006508//p…
Unigene0055497	PLDDELTA	PREDICTED: phospholipase D delta [Vitis vinifera]	ko01100//Metabolic pathways//Global and Overview//Metabolism;ko01110//Biosynthesis of secondary metabolites//Global and Overview//Metabolism;ko04144//Endocytosis//Transport and catabolism//Cellular Processes;ko00564//Glycerophospholipid metabolism//Lipid metabolism//Metabolism;ko00565//Ether lipid metabolism//Lipid metabolism//Metabolism	-	GO:0043167//ion binding;GO:0016298//lipase activity;GO:0004620//phospholipase activity;GO:0043169//cation binding;GO:0046872//metal ion binding;GO:0016787//hydrolase activity;GO:0005488//binding;GO:0016788//hydrolase activity, acting on ester bonds;GO:0003824//catalytic activity	GO:0044699//single-organism process;GO:0006629//lipid metabolic process;GO:0009987//cellular process;GO:0008152//metabolic process;GO:0044710//single-organism metabolic process;GO:0046486//glycerolipid metabolic process;GO:0006644//phospholipid metabolic process;GO:0006650//glycerophospholipid metabolic process;GO:0071704//organic substance metabolic process;GO:0006793//phosphorus metabolic proce…
Unigene0055521	-	BAT2 domain-containing protein 1 [Theobroma cacao]	-	GO:0005737//cytoplasm;GO:0044424//intracellular part;GO:0044444//cytoplasmic part;GO:0044464//cell part;GO:0005622//intracellular;GO:0005623//cell	-	-
Unigene0055528	GPT2	PREDICTED: glucose-6-phosphate/phosphate translocator 2, chloroplastic-like [Nelumbo nucifera]	-	GO:0044425//membrane part;GO:0016020//membrane;GO:0031224//intrinsic component of membrane	-	GO:0051234//establishment of localization;GO:0051179//localization
Unigene0055682	-	PREDICTED: DEAD-box ATP-dependent RNA helicase 42-like [Nelumbo nucifera]	-	-	-	-
Unigene0055684	PI4KB1	PREDICTED: LOW QUALITY PROTEIN: phosphatidylinositol 4-kinase beta 1 [Phoenix dactylifera]	-	-	GO:0016772//transferase activity, transferring phosphorus-containing groups;GO:0003824//catalytic activity;GO:0016740//transferase activity	GO:0009987//cellular process;GO:0006629//lipid metabolic process;GO:0044238//primary metabolic process;GO:0019637//organophosphate metabolic process;GO:0046488//phosphatidylinositol metabolic process;GO:0006796//phosphate-containing compound metabolic process;GO:0044763//single-organism cellular process;GO:0008152//metabolic process;GO:0006644//phospholipid metabolic process;GO:0006793//phosphoru…
Unigene0055686	PI4KB2	PREDICTED: LOW QUALITY PROTEIN: phosphatidylinositol 4-kinase beta 1 [Phoenix dactylifera]	-	-	-	-
Unigene0055695	PUR2	PREDICTED: phosphoribosylamine--glycine ligase isoform X1 [Nelumbo nucifera]	ko01100//Metabolic pathways//Global and Overview//Metabolism;ko01110//Biosynthesis of secondary metabolites//Global and Overview//Metabolism;ko01130//Biosynthesis of antibiotics//Global and Overview//Metabolism;ko00230//Purine metabolism//Nucleotide metabolism//Metabolism	GO:0044435//plastid part;GO:0044464//cell part;GO:0005622//intracellular;GO:0043227//membrane-bounded organelle;GO:0044444//cytoplasmic part;GO:0043226//organelle;GO:0044422//organelle part;GO:0009536//plastid;GO:0044446//intracellular organelle part;GO:0043231//intracellular membrane-bounded organelle;GO:0005737//cytoplasm;GO:0009532//plastid stroma;GO:0044424//intracellular part;GO:0005623//cel…	GO:0036094//small molecule binding;GO:0001882//nucleoside binding;GO:0016879//ligase activity, forming carbon-nitrogen bonds;GO:0003824//catalytic activity;GO:0016874//ligase activity;GO:1901363//heterocyclic compound binding;GO:0097367//carbohydrate derivative binding;GO:0032549//ribonucleoside binding;GO:0043169//cation binding;GO:0001883//purine nucleoside binding;GO:0032550//purine ribonucleo…	GO:0006144//purine nucleobase metabolic process;GO:0044249//cellular biosynthetic process;GO:0009168//purine ribonucleoside monophosphate biosynthetic process;GO:0009259//ribonucleotide metabolic process;GO:0044238//primary metabolic process;GO:0034641//cellular nitrogen compound metabolic process;GO:0046390//ribose phosphate biosynthetic process;GO:0006164//purine nucleotide biosynthetic process…
Unigene0055697	crop	PREDICTED: luc7-like protein isoform X1 [Musa acuminata subsp. malaccensis] [Musa acuminata]	-	-	-	-
Unigene0055705	-	PREDICTED: titin [Beta vulgaris subsp. vulgaris] [Beta vulgaris]	-	-	-	-
Unigene0055770	-	--	-	-	-	-
Unigene0055820	-	Nuclear factor related to kappa-B-binding protein [Anthurium amnicola]	-	-	-	-
Unigene0055833	ERD15	PREDICTED: protein EARLY RESPONSIVE TO DEHYDRATION 15-like [Phoenix dactylifera]	-	-	-	-
Unigene0055879	KEG	PREDICTED: E3 ubiquitin-protein ligase KEG isoform X2 [Nelumbo nucifera]	-	GO:0044424//intracellular part;GO:0012505//endomembrane system;GO:0044444//cytoplasmic part;GO:0043231//intracellular membrane-bounded organelle;GO:0043227//membrane-bounded organelle;GO:0044422//organelle part;GO:0005622//intracellular;GO:0044464//cell part;GO:0005623//cell;GO:0031984//organelle subcompartment;GO:0005768//endosome;GO:0005737//cytoplasm;GO:0043229//intracellular organelle;GO:0044…	GO:0016301//kinase activity;GO:0016773//phosphotransferase activity, alcohol group as acceptor;GO:0043169//cation binding;GO:0003824//catalytic activity;GO:0001883//purine nucleoside binding;GO:0032549//ribonucleoside binding;GO:1901363//heterocyclic compound binding;GO:0004672//protein kinase activity;GO:0016740//transferase activity;GO:0016772//transferase activity, transferring phosphorus-cont…	GO:0009057//macromolecule catabolic process;GO:0006725//cellular aromatic compound metabolic process;GO:0051641//cellular localization;GO:0016071//mRNA metabolic process;GO:0043412//macromolecule modification;GO:0046903//secretion;GO:0006464//cellular protein modification process;GO:0044267//cellular protein metabolic process;GO:0006402//mRNA catabolic process;GO:0044270//cellular nitrogen compou…
Unigene0055881	ppk15	PREDICTED: dual specificity tyrosine-phosphorylation-regulated kinase 1B-like [Nelumbo nucifera]	-	-	-	-
Unigene0055926	-	PREDICTED: uncharacterized protein LOC100249192 [Vitis vinifera]	-	-	-	-
Unigene0055933	At5g49980	PREDICTED: transport inhibitor response 1-like protein [Vitis vinifera]	-	-	-	-
Unigene0055959	ISPG	PREDICTED: 4-hydroxy-3-methylbut-2-en-1-yl diphosphate synthase (ferredoxin), chloroplastic [Nelumbo nucifera]	ko01100//Metabolic pathways//Global and Overview//Metabolism;ko01110//Biosynthesis of secondary metabolites//Global and Overview//Metabolism;ko01130//Biosynthesis of antibiotics//Global and Overview//Metabolism;ko00900//Terpenoid backbone biosynthesis//Metabolism of terpenoids and polyketides//Metabolism	GO:0005737//cytoplasm;GO:0044422//organelle part;GO:0044446//intracellular organelle part;GO:0009536//plastid;GO:0043227//membrane-bounded organelle;GO:0009532//plastid stroma;GO:0044464//cell part;GO:0005623//cell;GO:0009526//plastid envelope;GO:0044424//intracellular part;GO:0031967//organelle envelope;GO:0043226//organelle;GO:0044444//cytoplasmic part;GO:0043229//intracellular organelle;GO:000…	GO:0051536//iron-sulfur cluster binding;GO:0043169//cation binding;GO:0016725//oxidoreductase activity, acting on CH or CH2 groups;GO:0016491//oxidoreductase activity;GO:0043167//ion binding;GO:0052592//oxidoreductase activity, acting on CH or CH2 groups, with an iron-sulfur protein as acceptor;GO:0051540//metal cluster binding;GO:0003824//catalytic activity;GO:0005488//binding;GO:0046914//transi…	GO:2000112//regulation of cellular macromolecule biosynthetic process;GO:0002376//immune system process;GO:0044237//cellular metabolic process;GO:0009639//response to red or far red light;GO:0010468//regulation of gene expression;GO:0001101//response to acid chemical;GO:0006082//organic acid metabolic process;GO:0006996//organelle organization;GO:0016114//terpenoid biosynthetic process;GO:0006629…
Unigene0055987	Zmat2	PREDICTED: zinc finger matrin-type protein 2 isoform X1 [Ziziphus jujuba]	ko03040//Spliceosome//Transcription//Genetic Information Processing	-	GO:0043167//ion binding;GO:0005488//binding;GO:0043169//cation binding;GO:0046914//transition metal ion binding;GO:0046872//metal ion binding	-
Unigene0055990	-	PREDICTED: zinc finger matrin-type protein 2 [Beta vulgaris subsp. vulgaris] [Beta vulgaris]	ko03040//Spliceosome//Transcription//Genetic Information Processing	-	GO:0046872//metal ion binding;GO:0005488//binding;GO:0043169//cation binding;GO:0046914//transition metal ion binding;GO:0043167//ion binding	-
Unigene0056157	TIC100	PREDICTED: protein TIC 100-like [Malus domestica]	-	GO:0043229//intracellular organelle;GO:0043231//intracellular membrane-bounded organelle;GO:0044444//cytoplasmic part;GO:0016020//membrane;GO:0044435//plastid part;GO:0005737//cytoplasm;GO:0043226//organelle;GO:0019866//organelle inner membrane;GO:0009507//chloroplast;GO:0031090//organelle membrane;GO:0009526//plastid envelope;GO:0005622//intracellular;GO:0043227//membrane-bounded organelle;GO:00…	GO:0022892//substrate-specific transporter activity;GO:0005215//transporter activity	GO:1902582//single-organism intracellular transport;GO:0032502//developmental process;GO:0008104//protein localization;GO:0006886//intracellular protein transport;GO:0009987//cellular process;GO:0045184//establishment of protein localization;GO:0071702//organic substance transport;GO:0006996//organelle organization;GO:0071840//cellular component organization or biogenesis;GO:0061024//membrane org…
Unigene0056158	TIC100	PREDICTED: protein TIC 100 [Nelumbo nucifera]	-	GO:0044422//organelle part;GO:0044446//intracellular organelle part;GO:0044435//plastid part;GO:0005737//cytoplasm;GO:0005622//intracellular;GO:0005623//cell;GO:0043226//organelle;GO:0031090//organelle membrane;GO:0019866//organelle inner membrane;GO:0031967//organelle envelope;GO:0043231//intracellular membrane-bounded organelle;GO:0043229//intracellular organelle;GO:0043227//membrane-bounded or…	GO:0022892//substrate-specific transporter activity;GO:0005215//transporter activity	GO:0016043//cellular component organization;GO:0006886//intracellular protein transport;GO:0046907//intracellular transport;GO:0071840//cellular component organization or biogenesis;GO:0006810//transport;GO:0033036//macromolecule localization;GO:0044802//single-organism membrane organization;GO:0051234//establishment of localization;GO:0044765//single-organism transport;GO:0061024//membrane organ…
Unigene0056201	-	PREDICTED: LDLR chaperone MESD [Vitis vinifera]	-	-	-	-
Unigene0056257	SUVH1	PREDICTED: histone-lysine N-methyltransferase, H3 lysine-9 specific SUVH1-like [Phoenix dactylifera]	ko00310//Lysine degradation//Amino acid metabolism//Metabolism	-	-	-
Unigene0056280	SFH1	PREDICTED: phosphatidylinositol/phosphatidylcholine transfer protein SFH1-like [Nelumbo nucifera]	-	-	-	-
Unigene0056305	Ankrd13b	PREDICTED: ankyrin repeat domain-containing protein 13C [Ricinus communis]	-	-	-	-
Unigene0056341	NLP3	nitrilase/cyanide hydratase and apolipoprotein N-acyltransferase family protein, partial [Chimonanthus praecox]	ko00250//Alanine, aspartate and glutamate metabolism//Amino acid metabolism//Metabolism	-	-	-
Unigene0056422	At1g67280	PREDICTED: probable lactoylglutathione lyase, chloroplastic [Nelumbo nucifera]	ko00620//Pyruvate metabolism//Carbohydrate metabolism//Metabolism	-	-	-
Unigene0056489	TSS	PREDICTED: protein TSS [Vitis vinifera]	-	-	-	-
Unigene0056491	-	--	-	-	-	-
Unigene0056492	MEKK1	PREDICTED: mitogen-activated protein kinase kinase kinase 1 [Elaeis guineensis]	ko04626//Plant-pathogen interaction//Environmental adaptation//Organismal Systems	-	GO:0016740//transferase activity;GO:0004672//protein kinase activity;GO:0016301//kinase activity;GO:0016772//transferase activity, transferring phosphorus-containing groups;GO:0016773//phosphotransferase activity, alcohol group as acceptor;GO:0003824//catalytic activity	GO:0044237//cellular metabolic process;GO:0008152//metabolic process;GO:0009987//cellular process;GO:0006793//phosphorus metabolic process;GO:0016310//phosphorylation;GO:0006796//phosphate-containing compound metabolic process
Unigene0056496	PHT4;7	Protein EFR3 B [Anthurium amnicola]	-	-	-	-
Unigene0056552	SRP72	PREDICTED: signal recognition particle subunit SRP72 [Phoenix dactylifera]	ko03060//Protein export//Folding, sorting and degradation//Genetic Information Processing	GO:0044444//cytoplasmic part;GO:0030529//intracellular ribonucleoprotein complex;GO:0044424//intracellular part;GO:0005622//intracellular;GO:0005623//cell;GO:0005737//cytoplasm;GO:0044464//cell part;GO:0048500//signal recognition particle;GO:0032991//macromolecular complex;GO:1990904//ribonucleoprotein complex	GO:0005488//binding;GO:0003676//nucleic acid binding;GO:0097159//organic cyclic compound binding;GO:1901363//heterocyclic compound binding;GO:0003723//RNA binding	GO:0006810//transport;GO:0044763//single-organism cellular process;GO:0044802//single-organism membrane organization;GO:0071702//organic substance transport;GO:0045184//establishment of protein localization;GO:0015031//protein transport;GO:0006613//cotranslational protein targeting to membrane;GO:0006612//protein targeting to membrane;GO:1902578//single-organism localization;GO:0006605//protein t…
Unigene0056566	-	PREDICTED: uncharacterized protein LOC104600482 isoform X1 [Nelumbo nucifera]	-	-	-	-
Unigene0056585	-	2OG-FeII_Oxy domain-containing protein/DIOX_N domain-containing protein [Cephalotus follicularis]	-	-	-	-
Unigene0056586	-	2OG-FeII_Oxy domain-containing protein/DIOX_N domain-containing protein [Cephalotus follicularis]	-	-	-	-
Unigene0056649	At4g32940	PREDICTED: vacuolar-processing enzyme [Elaeis guineensis]	-	-	GO:0003824//catalytic activity;GO:0016787//hydrolase activity	GO:0019538//protein metabolic process;GO:0044238//primary metabolic process;GO:0071704//organic substance metabolic process;GO:0008152//metabolic process;GO:0043170//macromolecule metabolic process
Unigene0056671	CEBPZ	PREDICTED: CCAAT/enhancer-binding protein zeta isoform X1 [Nelumbo nucifera]	-	-	-	-
Unigene0056689	UKL3	PREDICTED: uridine kinase-like protein 3 [Vitis vinifera]	ko01100//Metabolic pathways//Global and Overview//Metabolism;ko00240//Pyrimidine metabolism//Nucleotide metabolism//Metabolism	-	GO:0019205//nucleobase-containing compound kinase activity;GO:0032549//ribonucleoside binding;GO:0036094//small molecule binding;GO:0005488//binding;GO:1901363//heterocyclic compound binding;GO:0097367//carbohydrate derivative binding;GO:0001883//purine nucleoside binding;GO:0019206//nucleoside kinase activity;GO:0001882//nucleoside binding;GO:0097159//organic cyclic compound binding;GO:0016772//…	GO:0009259//ribonucleotide metabolic process;GO:0044238//primary metabolic process;GO:0009123//nucleoside monophosphate metabolic process;GO:0019693//ribose phosphate metabolic process;GO:1901564//organonitrogen compound metabolic process;GO:0009209//pyrimidine ribonucleoside triphosphate biosynthetic process;GO:0009147//pyrimidine nucleoside triphosphate metabolic process;GO:0046134//pyrimidine …
Unigene0056704	UBC10	PREDICTED: ubiquitin-conjugating enzyme E2 10-like [Gossypium hirsutum]	ko04141//Protein processing in endoplasmic reticulum//Folding, sorting and degradation//Genetic Information Processing;ko04120//Ubiquitin mediated proteolysis//Folding, sorting and degradation//Genetic Information Processing	-	-	-
Unigene0056775	RBL20	PREDICTED: rhomboid-like protein 20 [Vitis vinifera]	-	-	-	-
Unigene0056862	PRP19	PREDICTED: pre-mRNA-processing factor 19-like [Nelumbo nucifera]	ko03040//Spliceosome//Transcription//Genetic Information Processing;ko04120//Ubiquitin mediated proteolysis//Folding, sorting and degradation//Genetic Information Processing	-	GO:0003824//catalytic activity	GO:0044267//cellular protein metabolic process;GO:0006464//cellular protein modification process;GO:0009987//cellular process;GO:0043170//macromolecule metabolic process;GO:0019538//protein metabolic process;GO:0032446//protein modification by small protein conjugation;GO:0044237//cellular metabolic process;GO:0070647//protein modification by small protein conjugation or removal;GO:0008152//metab…
Unigene0056863	PRP19	PREDICTED: pre-mRNA-processing factor 19-like [Nelumbo nucifera]	ko03040//Spliceosome//Transcription//Genetic Information Processing;ko04120//Ubiquitin mediated proteolysis//Folding, sorting and degradation//Genetic Information Processing	-	-	-
Unigene0056864	PRP19	PREDICTED: pre-mRNA-processing factor 19 [Elaeis guineensis]	ko03040//Spliceosome//Transcription//Genetic Information Processing;ko04120//Ubiquitin mediated proteolysis//Folding, sorting and degradation//Genetic Information Processing	-	-	-
Unigene0056950	SBP2	PREDICTED: selenium-binding protein 1 [Theobroma cacao]	-	-	-	-
Unigene0056952	BLH1	PREDICTED: BEL1-like homeodomain protein 1 [Nelumbo nucifera]	-	-	GO:0005488//binding	GO:0051716//cellular response to stimulus;GO:0009058//biosynthetic process;GO:1901576//organic substance biosynthetic process;GO:0044237//cellular metabolic process;GO:0006950//response to stress;GO:0009987//cellular process;GO:0006807//nitrogen compound metabolic process;GO:0065007//biological regulation;GO:0050896//response to stimulus;GO:0071704//organic substance metabolic process;GO:0042221/…
Unigene0057083	SIR1	PREDICTED: sulfite reductase [ferredoxin], chloroplastic-like [Nelumbo nucifera]	ko01100//Metabolic pathways//Global and Overview//Metabolism;ko01120//Microbial metabolism in diverse environments//Global and Overview//Metabolism;ko00920//Sulfur metabolism//Energy metabolism//Metabolism	-	GO:0016667//oxidoreductase activity, acting on a sulfur group of donors;GO:0016673//oxidoreductase activity, acting on a sulfur group of donors, iron-sulfur protein as acceptor;GO:1901363//heterocyclic compound binding;GO:0016491//oxidoreductase activity;GO:0005488//binding;GO:0051540//metal cluster binding;GO:0097159//organic cyclic compound binding;GO:0051536//iron-sulfur cluster binding;GO:000…	GO:0044710//single-organism metabolic process;GO:0044699//single-organism process;GO:0008152//metabolic process
Unigene0057106	-	--	-	-	-	-
Unigene0057180	PRPF39	PREDICTED: pre-mRNA-processing factor 39 isoform X2 [Musa acuminata subsp. malaccensis] [Musa acuminata]	-	-	-	GO:0043170//macromolecule metabolic process;GO:0010467//gene expression;GO:0071704//organic substance metabolic process;GO:0044237//cellular metabolic process;GO:0006807//nitrogen compound metabolic process;GO:0090304//nucleic acid metabolic process;GO:0044238//primary metabolic process;GO:0006396//RNA processing;GO:0006725//cellular aromatic compound metabolic process;GO:0008152//metabolic proce…
Unigene0057184	POPTR_0012s05040g	PREDICTED: L-Ala-D/L-amino acid epimerase isoform X4 [Vitis vinifera]	-	-	GO:0016853//isomerase activity;GO:0003824//catalytic activity;GO:0016872//intramolecular lyase activity	-
Unigene0057368	PAB2	PREDICTED: polyadenylate-binding protein 2 [Amborella trichopoda]	ko03013//RNA transport//Translation//Genetic Information Processing;ko03018//RNA degradation//Folding, sorting and degradation//Genetic Information Processing;ko03015//mRNA surveillance pathway//Translation//Genetic Information Processing	GO:0043231//intracellular membrane-bounded organelle;GO:0043229//intracellular organelle;GO:0044424//intracellular part;GO:0005623//cell;GO:0043226//organelle;GO:0044444//cytoplasmic part;GO:0043227//membrane-bounded organelle;GO:0044464//cell part;GO:0005622//intracellular;GO:0005737//cytoplasm	GO:0003676//nucleic acid binding;GO:0097159//organic cyclic compound binding;GO:0005488//binding;GO:1901363//heterocyclic compound binding	GO:0019222//regulation of metabolic process;GO:0044764//multi-organism cellular process;GO:0009987//cellular process;GO:0050789//regulation of biological process;GO:0051704//multi-organism process;GO:0065007//biological regulation;GO:0044419//interspecies interaction between organisms;GO:0016032//viral process;GO:0044403//symbiosis, encompassing mutualism through parasitism;GO:0010608//posttransc…
Unigene0057452	TOM2A	PREDICTED: tobamovirus multiplication protein 2A-like [Nelumbo nucifera]	-	-	-	-
Unigene0057460	SPL6	PREDICTED: squamosa promoter-binding-like protein 1 [Nelumbo nucifera]	-	-	-	-
Unigene0057467	At1g30570	Kinase superfamily protein isoform 2 [Theobroma cacao]	-	-	GO:0036094//small molecule binding;GO:0005488//binding;GO:0032550//purine ribonucleoside binding;GO:0097159//organic cyclic compound binding;GO:0016772//transferase activity, transferring phosphorus-containing groups;GO:0032549//ribonucleoside binding;GO:0016740//transferase activity;GO:0003824//catalytic activity;GO:0097367//carbohydrate derivative binding;GO:1901363//heterocyclic compound bindi…	GO:0044260//cellular macromolecule metabolic process;GO:0009987//cellular process;GO:0006796//phosphate-containing compound metabolic process;GO:0071704//organic substance metabolic process;GO:0044267//cellular protein metabolic process;GO:0044238//primary metabolic process;GO:0036211//protein modification process;GO:0043170//macromolecule metabolic process;GO:0006793//phosphorus metabolic proces…
Unigene0057480	FTSH12	PREDICTED: ATP-dependent zinc metalloprotease FTSH 12, chloroplastic [Nelumbo nucifera]	-	GO:0043229//intracellular organelle;GO:0009507//chloroplast;GO:0009536//plastid;GO:0044446//intracellular organelle part;GO:0016020//membrane;GO:0043231//intracellular membrane-bounded organelle;GO:0044422//organelle part;GO:0005622//intracellular;GO:0031967//organelle envelope;GO:0031224//intrinsic component of membrane;GO:0044434//chloroplast part;GO:0044464//cell part;GO:0044424//intracellular…	GO:0017111//nucleoside-triphosphatase activity;GO:0001882//nucleoside binding;GO:0001883//purine nucleoside binding;GO:0003824//catalytic activity;GO:0097159//organic cyclic compound binding;GO:0070011//peptidase activity, acting on L-amino acid peptides;GO:0043167//ion binding;GO:0016817//hydrolase activity, acting on acid anhydrides;GO:1901363//heterocyclic compound binding;GO:0032550//purine r…	GO:0009987//cellular process;GO:1901575//organic substance catabolic process;GO:0022414//reproductive process;GO:0044267//cellular protein metabolic process;GO:0016043//cellular component organization;GO:0009057//macromolecule catabolic process;GO:0030163//protein catabolic process;GO:0044257//cellular protein catabolic process;GO:0006996//organelle organization;GO:0008152//metabolic process;GO:0…
Unigene0057497	TUBB1	PREDICTED: tubulin beta-1 chain [Vitis vinifera]	ko04145//Phagosome//Transport and catabolism//Cellular Processes	GO:0015630//microtubule cytoskeleton;GO:0005623//cell;GO:0032991//macromolecular complex;GO:0044464//cell part;GO:0005622//intracellular;GO:0043229//intracellular organelle;GO:0005856//cytoskeleton;GO:0043232//intracellular non-membrane-bounded organelle;GO:0044424//intracellular part;GO:0043228//non-membrane-bounded organelle;GO:0043226//organelle	GO:0097367//carbohydrate derivative binding;GO:0036094//small molecule binding;GO:0016817//hydrolase activity, acting on acid anhydrides;GO:0005488//binding;GO:0001882//nucleoside binding;GO:0016787//hydrolase activity;GO:0097159//organic cyclic compound binding;GO:0016462//pyrophosphatase activity;GO:1901363//heterocyclic compound binding;GO:0005198//structural molecule activity;GO:0003824//cata…	GO:0034622//cellular macromolecular complex assembly;GO:0044763//single-organism cellular process;GO:0006461//protein complex assembly;GO:0071840//cellular component organization or biogenesis;GO:0070271//protein complex biogenesis;GO:0009987//cellular process;GO:0071822//protein complex subunit organization;GO:0022607//cellular component assembly;GO:0043933//macromolecular complex subunit organi…
Unigene0057576	-	DUF4283 domain-containing protein, partial [Cephalotus follicularis]	-	-	-	-
Unigene0057617	At4g17486	PREDICTED: deSI-like protein At4g17486 [Vitis vinifera]	-	-	-	-
Unigene0057627	Rep	PREDICTED: rab escort protein 1 isoform X1 [Nelumbo nucifera]	-	-	-	-
Unigene0057630	Os03g0130400	PREDICTED: LOW QUALITY PROTEIN: probable adenylate kinase 6, chloroplastic [Phoenix dactylifera]	ko01100//Metabolic pathways//Global and Overview//Metabolism;ko01110//Biosynthesis of secondary metabolites//Global and Overview//Metabolism;ko01130//Biosynthesis of antibiotics//Global and Overview//Metabolism;ko00230//Purine metabolism//Nucleotide metabolism//Metabolism	-	GO:0016301//kinase activity;GO:0032549//ribonucleoside binding;GO:0016772//transferase activity, transferring phosphorus-containing groups;GO:0016740//transferase activity;GO:0032550//purine ribonucleoside binding;GO:0036094//small molecule binding;GO:0003824//catalytic activity;GO:0005488//binding;GO:1901363//heterocyclic compound binding;GO:0019205//nucleobase-containing compound kinase activit…	GO:0019637//organophosphate metabolic process;GO:0008152//metabolic process;GO:0034641//cellular nitrogen compound metabolic process;GO:0044238//primary metabolic process;GO:0055086//nucleobase-containing small molecule metabolic process;GO:0006139//nucleobase-containing compound metabolic process;GO:0006793//phosphorus metabolic process;GO:0044699//single-organism process;GO:0009117//nucleotide …
Unigene0057650	-	PREDICTED: xylulose kinase isoform X1 [Phoenix dactylifera]	-	-	-	-
Unigene0057653	At5g08530	PREDICTED: NADH dehydrogenase [ubiquinone] flavoprotein 1, mitochondrial isoform X3 [Juglans regia]	ko01100//Metabolic pathways//Global and Overview//Metabolism;ko00190//Oxidative phosphorylation//Energy metabolism//Metabolism	GO:0016020//membrane;GO:0044425//membrane part;GO:0044464//cell part;GO:0044444//cytoplasmic part;GO:0044429//mitochondrial part;GO:0005737//cytoplasm;GO:0043231//intracellular membrane-bounded organelle;GO:0031975//envelope;GO:0043226//organelle;GO:0031966//mitochondrial membrane;GO:0005740//mitochondrial envelope;GO:0043229//intracellular organelle;GO:0044424//intracellular part;GO:0005739//mit…	GO:0003954//NADH dehydrogenase activity;GO:0032553//ribonucleotide binding;GO:0036094//small molecule binding;GO:0051536//iron-sulfur cluster binding;GO:1901265//nucleoside phosphate binding;GO:0005488//binding;GO:0050136//NADH dehydrogenase (quinone) activity;GO:0097367//carbohydrate derivative binding;GO:1901363//heterocyclic compound binding;GO:0000166//nucleotide binding;GO:0051540//metal clu…	GO:0044257//cellular protein catabolic process;GO:0009987//cellular process;GO:0042221//response to chemical;GO:0040007//growth;GO:0065003//macromolecular complex assembly;GO:0022607//cellular component assembly;GO:0042157//lipoprotein metabolic process;GO:0034622//cellular macromolecular complex assembly;GO:0043170//macromolecule metabolic process;GO:0044237//cellular metabolic process;GO:000905…
Unigene0057702	-	PREDICTED: uncharacterized protein LOC18431017 [Amborella trichopoda]	-	-	-	-
Unigene0057746	AGL61	PREDICTED: agamous-like MADS-box protein AGL29 [Lupinus angustifolius]	-	-	-	-
Unigene0057758	PHOT1	phototropin, partial [Magnolia grandiflora]	-	-	-	-
Unigene0057783	CBR1	PREDICTED: NADH--cytochrome b5 reductase 1 [Amborella trichopoda]	ko00520//Amino sugar and nucleotide sugar metabolism//Carbohydrate metabolism//Metabolism	GO:0044422//organelle part;GO:0044444//cytoplasmic part;GO:0031967//organelle envelope;GO:0031090//organelle membrane;GO:0031966//mitochondrial membrane;GO:0044464//cell part;GO:0005623//cell;GO:0030312//external encapsulating structure;GO:0043226//organelle;GO:0071944//cell periphery;GO:0016020//membrane;GO:0043229//intracellular organelle;GO:0031224//intrinsic component of membrane;GO:0005618//…	GO:0003824//catalytic activity	GO:0044281//small molecule metabolic process;GO:0005996//monosaccharide metabolic process;GO:0071704//organic substance metabolic process;GO:0031365//N-terminal protein amino acid modification;GO:0043170//macromolecule metabolic process;GO:0019538//protein metabolic process;GO:0044699//single-organism process;GO:0042157//lipoprotein metabolic process;GO:0006497//protein lipidation;GO:0034645//cel…
Unigene0057796	STR6	PREDICTED: rhodanese-like domain-containing protein 6 [Nelumbo nucifera]	-	-	-	-
Unigene0057960	-	DUF1218 domain-containing protein, partial [Cephalotus follicularis]	-	-	-	GO:0044237//cellular metabolic process;GO:0045491//xylan metabolic process;GO:0010410//hemicellulose metabolic process;GO:0005975//carbohydrate metabolic process;GO:0071554//cell wall organization or biogenesis;GO:0044036//cell wall macromolecule metabolic process;GO:0071704//organic substance metabolic process;GO:0044260//cellular macromolecule metabolic process;GO:0043170//macromolecule metabol…
Unigene0057961	-	DnaJ subfamily C member 22 [Theobroma cacao]	-	-	-	-
Unigene0057985	CIPK24	PREDICTED: CBL-interacting serine/threonine-protein kinase 24 [Nelumbo nucifera]	-	GO:0043227//membrane-bounded organelle;GO:0016020//membrane;GO:0044424//intracellular part;GO:0044446//intracellular organelle part;GO:0044444//cytoplasmic part;GO:0098588//bounding membrane of organelle;GO:0005622//intracellular;GO:0044464//cell part;GO:0031090//organelle membrane;GO:0005623//cell;GO:0043229//intracellular organelle;GO:0043231//intracellular membrane-bounded organelle;GO:0005774…	GO:0001883//purine nucleoside binding;GO:0036094//small molecule binding;GO:0016301//kinase activity;GO:0016772//transferase activity, transferring phosphorus-containing groups;GO:0005515//protein binding;GO:0003824//catalytic activity;GO:0001882//nucleoside binding;GO:0097367//carbohydrate derivative binding;GO:0032550//purine ribonucleoside binding;GO:1901363//heterocyclic compound binding;GO:0…	GO:0019538//protein metabolic process;GO:0044267//cellular protein metabolic process;GO:0009628//response to abiotic stimulus;GO:0050896//response to stimulus;GO:0050789//regulation of biological process;GO:0006464//cellular protein modification process;GO:0044237//cellular metabolic process;GO:0043412//macromolecule modification;GO:0050794//regulation of cellular process;GO:0071704//organic subs…
Unigene0058018	-	PREDICTED: BEL1-like homeodomain protein 4 [Glycine max]	-	-	-	-
Unigene0058253	SPCC24B10.10c	PREDICTED: nuclear valosin-containing protein-like [Juglans regia]	-	-	GO:0003824//catalytic activity;GO:0032550//purine ribonucleoside binding;GO:0036094//small molecule binding;GO:0097159//organic cyclic compound binding;GO:0097367//carbohydrate derivative binding;GO:0001882//nucleoside binding;GO:1901363//heterocyclic compound binding;GO:0001883//purine nucleoside binding;GO:0032549//ribonucleoside binding;GO:0005488//binding	-
Unigene0058265	Os02g0611500	PREDICTED: eukaryotic translation initiation factor [Vitis vinifera]	ko03013//RNA transport//Translation//Genetic Information Processing	-	-	-
Unigene0058267	MYB4	PREDICTED: transcription factor MYB3-like [Nelumbo nucifera]	-	GO:0043229//intracellular organelle;GO:0005623//cell;GO:0043231//intracellular membrane-bounded organelle;GO:0044424//intracellular part;GO:0043226//organelle;GO:0043227//membrane-bounded organelle;GO:0044464//cell part;GO:0005622//intracellular	GO:0005488//binding;GO:0001071//nucleic acid binding transcription factor activity;GO:0003676//nucleic acid binding;GO:1901363//heterocyclic compound binding;GO:0097159//organic cyclic compound binding	GO:0001101//response to acid chemical;GO:0065007//biological regulation;GO:0048580//regulation of post-embryonic development;GO:2000026//regulation of multicellular organismal development;GO:0010468//regulation of gene expression;GO:0007275//multicellular organism development;GO:0044702//single organism reproductive process;GO:0048856//anatomical structure development;GO:0009791//post-embryonic d…
Unigene0058294	HUA2	PREDICTED: ENHANCER OF AG-4 protein 2-like isoform X1 [Gossypium raimondii]	-	-	-	-
Unigene0058341	CYP65	PREDICTED: peptidyl-prolyl cis-trans isomerase CYP65-like [Nicotiana tabacum]	ko04120//Ubiquitin mediated proteolysis//Folding, sorting and degradation//Genetic Information Processing	-	-	-
Unigene0058366	-	--	-	-	-	-
Unigene0058402	dyrk2	Kinase domain-containing protein isoform 1 [Theobroma cacao]	-	-	GO:0003824//catalytic activity;GO:0016772//transferase activity, transferring phosphorus-containing groups;GO:0016301//kinase activity;GO:0016740//transferase activity	GO:0006796//phosphate-containing compound metabolic process;GO:0008152//metabolic process;GO:0006793//phosphorus metabolic process;GO:0044237//cellular metabolic process;GO:0009987//cellular process
Unigene0058444	HLTF	SNF2_N domain-containing protein/Helicase_C domain-containing protein/HIRAN domain-containing protein/zf-C3HC4_2 domain-containing protein, partial [Cephalotus follicularis]	-	-	-	-
Unigene0058474	SKIP5	PREDICTED: F-box protein SKIP5 isoform X3 [Vitis vinifera]	-	-	-	-
Unigene0058516	HSP81-1	PREDICTED: heat shock cognate protein 80 [Nelumbo nucifera]	ko04141//Protein processing in endoplasmic reticulum//Folding, sorting and degradation//Genetic Information Processing;ko04626//Plant-pathogen interaction//Environmental adaptation//Organismal Systems	-	-	-
Unigene0058541	-	dead-box atp-dependent rna helicase 32 [Nicotiana attenuata]	-	-	-	-
Unigene0058559	alkbh8	PREDICTED: alkylated DNA repair protein alkB homolog 8 [Nelumbo nucifera]	-	-	GO:0003824//catalytic activity;GO:0016491//oxidoreductase activity	GO:0008152//metabolic process
Unigene0058567	-	--	-	-	-	-
Unigene0058683	-	--	-	-	-	-
Unigene0058709	HSP70	PREDICTED: stromal 70 kDa heat shock-related protein, chloroplastic [Nelumbo nucifera]	-	-	GO:0005488//binding;GO:0001883//purine nucleoside binding;GO:0005515//protein binding;GO:1901363//heterocyclic compound binding;GO:0097367//carbohydrate derivative binding;GO:0036094//small molecule binding;GO:0032549//ribonucleoside binding;GO:0001882//nucleoside binding;GO:0097159//organic cyclic compound binding;GO:0032550//purine ribonucleoside binding	GO:0044267//cellular protein metabolic process;GO:0008152//metabolic process;GO:0071704//organic substance metabolic process;GO:0019538//protein metabolic process;GO:0044237//cellular metabolic process;GO:0009987//cellular process;GO:0044238//primary metabolic process;GO:0043170//macromolecule metabolic process;GO:0044260//cellular macromolecule metabolic process
Unigene0058711	HSP70	PREDICTED: stromal 70 kDa heat shock-related protein, chloroplastic [Vitis vinifera]	-	-	GO:0016627//oxidoreductase activity, acting on the CH-CH group of donors;GO:0036094//small molecule binding;GO:0001883//purine nucleoside binding;GO:0016491//oxidoreductase activity;GO:0097367//carbohydrate derivative binding;GO:0005515//protein binding;GO:0001882//nucleoside binding;GO:0032549//ribonucleoside binding;GO:0005488//binding;GO:0032550//purine ribonucleoside binding;GO:0003824//catal…	GO:0019538//protein metabolic process;GO:0044699//single-organism process;GO:0008152//metabolic process;GO:0044237//cellular metabolic process;GO:0044710//single-organism metabolic process;GO:0044267//cellular protein metabolic process;GO:0044260//cellular macromolecule metabolic process;GO:0044238//primary metabolic process;GO:0071704//organic substance metabolic process;GO:0043170//macromolecul…
Unigene0058715	nipbla	PREDICTED: nipped-B-like protein isoform X2 [Vitis vinifera]	-	-	GO:0043167//ion binding;GO:0043169//cation binding;GO:0005488//binding	GO:0007275//multicellular organism development;GO:0044267//cellular protein metabolic process;GO:0048869//cellular developmental process;GO:0009790//embryo development;GO:0018193//peptidyl-amino acid modification;GO:0050789//regulation of biological process;GO:0003006//developmental process involved in reproduction;GO:0016043//cellular component organization;GO:0006464//cellular protein modificat…
Unigene0058772	SRRM1	PREDICTED: serine/arginine repetitive matrix protein 1-like isoform X1 [Elaeis guineensis]	ko03013//RNA transport//Translation//Genetic Information Processing;ko03015//mRNA surveillance pathway//Translation//Genetic Information Processing	-	-	-
Unigene0058815	P4H4	PREDICTED: probable prolyl 4-hydroxylase 4 [Nelumbo nucifera]	ko01100//Metabolic pathways//Global and Overview//Metabolism;ko00330//Arginine and proline metabolism//Amino acid metabolism//Metabolism	-	GO:0019842//vitamin binding;GO:0016491//oxidoreductase activity;GO:0046914//transition metal ion binding;GO:0046872//metal ion binding;GO:0003824//catalytic activity;GO:0016705//oxidoreductase activity, acting on paired donors, with incorporation or reduction of molecular oxygen;GO:0036094//small molecule binding;GO:0005488//binding;GO:0043169//cation binding;GO:0043167//ion binding	GO:0044267//cellular protein metabolic process;GO:0044237//cellular metabolic process;GO:0044710//single-organism metabolic process;GO:0008152//metabolic process;GO:0071704//organic substance metabolic process;GO:0006464//cellular protein modification process;GO:0019538//protein metabolic process;GO:0044699//single-organism process;GO:0043170//macromolecule metabolic process;GO:0043412//macromole…
Unigene0058902	ABI5	PREDICTED: ABSCISIC ACID-INSENSITIVE 5-like protein 2 isoform X3 [Malus domestica]	ko04075//Plant hormone signal transduction//Signal transduction//Environmental Information Processing	-	-	-
Unigene0058922	CIP8	PREDICTED: E3 ubiquitin-protein ligase CIP8 [Citrus sinensis]	-	-	-	-
Unigene0058951	-	--	-	-	-	-
Unigene0059020	RPS15AA	PREDICTED: 40S ribosomal protein S15a-1 [Arachis duranensis]	ko03010//Ribosome//Translation//Genetic Information Processing	-	-	-
Unigene0059022	RPS15AA	PREDICTED: 40S ribosomal protein S15a-1-like [Gossypium hirsutum]	ko03010//Ribosome//Translation//Genetic Information Processing	-	-	-
Unigene0059058	GAPC	glyceraldehyde 3-phosphate dehydrogenase [Magnolia liliiflora]	ko01100//Metabolic pathways//Global and Overview//Metabolism;ko01110//Biosynthesis of secondary metabolites//Global and Overview//Metabolism;ko01130//Biosynthesis of antibiotics//Global and Overview//Metabolism;ko01120//Microbial metabolism in diverse environments//Global and Overview//Metabolism;ko01200//Carbon metabolism//Global and Overview//Metabolism;ko01230//Biosynthesis of amino acids//Glo…	-	-	-
Unigene0059069	At1g13570	F-box/LRR-repeat protein At3g26922-like [Ananas comosus]	-	-	-	-
Unigene0059076	-	PREDICTED: probable DNA-directed RNA polymerase I subunit RPA43 isoform X1 [Phoenix dactylifera]	-	-	-	-
Unigene0059124	RPOT3	PREDICTED: DNA-directed RNA polymerase 3, chloroplastic isoform X2 [Nelumbo nucifera]	-	GO:0043226//organelle;GO:0043229//intracellular organelle;GO:0044444//cytoplasmic part;GO:0044424//intracellular part;GO:0005737//cytoplasm;GO:0043227//membrane-bounded organelle;GO:0044464//cell part;GO:0009536//plastid;GO:0005622//intracellular;GO:0043231//intracellular membrane-bounded organelle;GO:0005623//cell	GO:0016779//nucleotidyltransferase activity;GO:0003824//catalytic activity;GO:0016740//transferase activity;GO:0016772//transferase activity, transferring phosphorus-containing groups	-
Unigene0059226	FEN1	PREDICTED: flap endonuclease 1 isoform X2 [Prunus mume]	ko03030//DNA replication//Replication and repair//Genetic Information Processing;ko03410//Base excision repair//Replication and repair//Genetic Information Processing;ko03450//Non-homologous end-joining//Replication and repair//Genetic Information Processing	-	-	-
Unigene0059281	B3GALT19	PREDICTED: hydroxyproline O-galactosyltransferase GALT6-like [Nelumbo nucifera]	-	GO:0016020//membrane;GO:0044425//membrane part;GO:0031224//intrinsic component of membrane	GO:0016757//transferase activity, transferring glycosyl groups;GO:0035250//UDP-galactosyltransferase activity;GO:0005488//binding;GO:0008194//UDP-glycosyltransferase activity;GO:0016758//transferase activity, transferring hexosyl groups;GO:0016740//transferase activity;GO:0008378//galactosyltransferase activity;GO:0003824//catalytic activity	GO:0044267//cellular protein metabolic process;GO:0008152//metabolic process;GO:0043170//macromolecule metabolic process;GO:0044237//cellular metabolic process;GO:0009987//cellular process;GO:0006464//cellular protein modification process;GO:0044260//cellular macromolecule metabolic process;GO:0044238//primary metabolic process;GO:0036211//protein modification process;GO:0019538//protein metaboli…
Unigene0059298	-	PREDICTED: uncharacterized protein LOC103336100 [Prunus mume]	-	-	-	-
Unigene0059377	-	PREDICTED: CTL-like protein DDB_G0274487 [Elaeis guineensis]	-	GO:0016020//membrane;GO:0044425//membrane part;GO:0031224//intrinsic component of membrane	-	GO:0043436//oxoacid metabolic process;GO:0008652//cellular amino acid biosynthetic process;GO:0044238//primary metabolic process;GO:0044711//single-organism biosynthetic process;GO:0044249//cellular biosynthetic process;GO:0044281//small molecule metabolic process;GO:0000096//sulfur amino acid metabolic process;GO:0044710//single-organism metabolic process;GO:0016053//organic acid biosynthetic pr…
Unigene0059379	DDB_G0274487	Choline_transpo domain-containing protein [Cephalotus follicularis]	-	-	-	-
Unigene0059415	Dnajc2	PREDICTED: dnaJ homolog subfamily C member 2 [Eucalyptus grandis]	-	-	-	-
Unigene0059552	CNGC2	PREDICTED: cyclic nucleotide-gated ion channel 2 [Nelumbo nucifera]	ko04626//Plant-pathogen interaction//Environmental adaptation//Organismal Systems	GO:0016020//membrane;GO:0031224//intrinsic component of membrane;GO:0044425//membrane part	-	GO:0044765//single-organism transport;GO:0044699//single-organism process;GO:1902578//single-organism localization;GO:0006810//transport;GO:0009987//cellular process;GO:0006811//ion transport;GO:0051179//localization;GO:0044763//single-organism cellular process;GO:0051234//establishment of localization
Unigene0059567	PRR1	PREDICTED: two-component response regulator-like PRR1 [Nelumbo nucifera]	ko04712//Circadian rhythm - plant//Environmental adaptation//Organismal Systems	-	-	GO:0065007//biological regulation;GO:0050896//response to stimulus;GO:0009987//cellular process;GO:0008152//metabolic process;GO:0050789//regulation of biological process;GO:0044699//single-organism process
Unigene0059576	yjcL	PREDICTED: uncharacterized membrane protein YjcL [Phoenix dactylifera]	-	-	-	-
Unigene0059582	RH40	PREDICTED: DEAD-box ATP-dependent RNA helicase 46 [Ziziphus jujuba]	ko03040//Spliceosome//Transcription//Genetic Information Processing	-	GO:0003824//catalytic activity;GO:0016787//hydrolase activity;GO:0097159//organic cyclic compound binding;GO:0005488//binding;GO:1901363//heterocyclic compound binding	GO:0008152//metabolic process;GO:0071704//organic substance metabolic process;GO:0044237//cellular metabolic process;GO:0044238//primary metabolic process;GO:0071840//cellular component organization or biogenesis;GO:0009987//cellular process
Unigene0059611	PF13_0198	Cingulin [Anthurium amnicola]	-	-	-	-
Unigene0059612	PPI1	PREDICTED: microtubule-associated protein futsch isoform X2 [Vitis vinifera]	-	-	-	-
Unigene0059706	SFH1	PREDICTED: phosphatidylinositol/phosphatidylcholine transfer protein SFH1-like [Nelumbo nucifera]	-	-	-	-
Unigene0059730	tbc1d5A	PREDICTED: TBC1 domain family member 5 homolog B-like [Nelumbo nucifera]	-	-	-	-
Unigene0059774	ACR4	PREDICTED: ACT domain-containing protein ACR4-like [Nelumbo nucifera]	-	-	GO:0031406//carboxylic acid binding;GO:0003824//catalytic activity;GO:0043167//ion binding;GO:0043168//anion binding;GO:0036094//small molecule binding;GO:0016740//transferase activity;GO:0043177//organic acid binding;GO:0016772//transferase activity, transferring phosphorus-containing groups;GO:0005488//binding	-
Unigene0059817	GAE2	PREDICTED: UDP-glucuronate 4-epimerase 3 [Citrus sinensis]	ko01100//Metabolic pathways//Global and Overview//Metabolism;ko00500//Starch and sucrose metabolism//Carbohydrate metabolism//Metabolism;ko00520//Amino sugar and nucleotide sugar metabolism//Carbohydrate metabolism//Metabolism	GO:0016020//membrane;GO:0005737//cytoplasm;GO:0005622//intracellular;GO:0044425//membrane part;GO:0031090//organelle membrane;GO:0044431//Golgi apparatus part;GO:0044422//organelle part;GO:0043229//intracellular organelle;GO:0043226//organelle;GO:0031224//intrinsic component of membrane;GO:0098588//bounding membrane of organelle;GO:0044424//intracellular part;GO:0005623//cell;GO:0044444//cytoplas…	GO:0048037//cofactor binding;GO:0005488//binding;GO:0003824//catalytic activity;GO:0016857//racemase and epimerase activity, acting on carbohydrates and derivatives;GO:0016853//isomerase activity;GO:0016854//racemase and epimerase activity	GO:0008152//metabolic process;GO:0044238//primary metabolic process
Unigene0059872	CHR8	PREDICTED: protein CHROMATIN REMODELING 8 isoform X2 [Nelumbo nucifera]	ko03420//Nucleotide excision repair//Replication and repair//Genetic Information Processing	-	GO:0036094//small molecule binding;GO:1901363//heterocyclic compound binding;GO:0032549//ribonucleoside binding;GO:0001883//purine nucleoside binding;GO:0001882//nucleoside binding;GO:0032550//purine ribonucleoside binding;GO:0097367//carbohydrate derivative binding;GO:0097159//organic cyclic compound binding;GO:0005488//binding	-
Unigene0059997	-	Ankyrin repeat domain-containing 34B [Gossypium arboreum]	-	-	-	-
Unigene0060025	THY-2	PREDICTED: bifunctional dihydrofolate reductase-thymidylate synthase isoform X1 [Vitis vinifera]	ko01100//Metabolic pathways//Global and Overview//Metabolism;ko00240//Pyrimidine metabolism//Nucleotide metabolism//Metabolism;ko00670//One carbon pool by folate//Metabolism of cofactors and vitamins//Metabolism;ko00790//Folate biosynthesis//Metabolism of cofactors and vitamins//Metabolism	-	GO:0008168//methyltransferase activity;GO:0005488//binding;GO:0036094//small molecule binding;GO:0003824//catalytic activity;GO:0097159//organic cyclic compound binding;GO:0042083//5,10-methylenetetrahydrofolate-dependent methyltransferase activity;GO:1901265//nucleoside phosphate binding;GO:0000166//nucleotide binding;GO:0016740//transferase activity;GO:1901363//heterocyclic compound binding;GO:…	GO:0009162//deoxyribonucleoside monophosphate metabolic process;GO:0006575//cellular modified amino acid metabolic process;GO:0009176//pyrimidine deoxyribonucleoside monophosphate metabolic process;GO:0043604//amide biosynthetic process;GO:0009130//pyrimidine nucleoside monophosphate biosynthetic process;GO:0046483//heterocycle metabolic process;GO:0016053//organic acid biosynthetic process;GO:00…
Unigene0060047	-	--	-	-	-	-
Unigene0060073	tif211	Eukaryotic translation initiation factor 2 subunit alpha [Anthurium amnicola]	ko04141//Protein processing in endoplasmic reticulum//Folding, sorting and degradation//Genetic Information Processing;ko03013//RNA transport//Translation//Genetic Information Processing	GO:0043234//protein complex;GO:0032991//macromolecular complex	GO:0003676//nucleic acid binding;GO:0003723//RNA binding;GO:1901363//heterocyclic compound binding;GO:0008135//translation factor activity, RNA binding;GO:0005488//binding;GO:0097159//organic cyclic compound binding	GO:1901564//organonitrogen compound metabolic process;GO:0019538//protein metabolic process;GO:0044249//cellular biosynthetic process;GO:0044260//cellular macromolecule metabolic process;GO:0043043//peptide biosynthetic process;GO:0071704//organic substance metabolic process;GO:0044271//cellular nitrogen compound biosynthetic process;GO:0009058//biosynthetic process;GO:0044238//primary metabolic …
Unigene0060075	ARP	PREDICTED: DNA-(apurinic or apyrimidinic site) lyase, chloroplastic isoform X1 [Nelumbo nucifera]	ko03410//Base excision repair//Replication and repair//Genetic Information Processing	-	-	-
Unigene0060099	RER3	PREDICTED: protein RETICULATA-RELATED 3, chloroplastic-like [Nelumbo nucifera]	-	-	-	-
Unigene0060136	VIII-1	PREDICTED: myosin-1 [Amborella trichopoda]	-	-	-	-
Unigene0060158	BRM	PREDICTED: ATP-dependent helicase BRM-like isoform X1 [Nelumbo nucifera]	-	GO:0044424//intracellular part;GO:0005622//intracellular;GO:0044464//cell part;GO:0005623//cell	GO:0003824//catalytic activity;GO:1901363//heterocyclic compound binding;GO:0016817//hydrolase activity, acting on acid anhydrides;GO:0097159//organic cyclic compound binding;GO:0005488//binding;GO:0016818//hydrolase activity, acting on acid anhydrides, in phosphorus-containing anhydrides;GO:0003676//nucleic acid binding;GO:0016787//hydrolase activity	GO:0034645//cellular macromolecule biosynthetic process;GO:0016043//cellular component organization;GO:0043170//macromolecule metabolic process;GO:0071704//organic substance metabolic process;GO:0065007//biological regulation;GO:0009059//macromolecule biosynthetic process;GO:0051276//chromosome organization;GO:0043933//macromolecular complex subunit organization;GO:0060255//regulation of macromol…
Unigene0060180	EPSIN1	PREDICTED: clathrin interactor EPSIN 1-like [Nelumbo nucifera]	ko04144//Endocytosis//Transport and catabolism//Cellular Processes	GO:0005622//intracellular;GO:0043231//intracellular membrane-bounded organelle;GO:0043226//organelle;GO:0005623//cell;GO:0043229//intracellular organelle;GO:0031410//cytoplasmic vesicle;GO:0043228//non-membrane-bounded organelle;GO:0044464//cell part;GO:0043227//membrane-bounded organelle;GO:0044444//cytoplasmic part;GO:0031982//vesicle;GO:0005737//cytoplasm;GO:0043232//intracellular non-membrane…	-	GO:0008104//protein localization;GO:0033036//macromolecule localization;GO:0045184//establishment of protein localization;GO:0006886//intracellular protein transport;GO:0034613//cellular protein localization;GO:0070727//cellular macromolecule localization;GO:0051179//localization;GO:0006810//transport;GO:0051649//establishment of localization in cell;GO:0051641//cellular localization;GO:0071702//…
Unigene0060219	TCX2	PREDICTED: protein tesmin/TSO1-like CXC 4 [Nelumbo nucifera]	-	-	-	-
Unigene0060271	chmp5	PREDICTED: charged multivesicular body protein 5-like [Populus euphratica]	ko04144//Endocytosis//Transport and catabolism//Cellular Processes	-	-	-
Unigene0060272	chmp5	Snf7 [Corchorus capsularis]	ko04144//Endocytosis//Transport and catabolism//Cellular Processes	-	-	-
Unigene0060281	HSP18.2	PREDICTED: 18.1 kDa class I heat shock protein [Theobroma cacao]	ko04141//Protein processing in endoplasmic reticulum//Folding, sorting and degradation//Genetic Information Processing	-	-	-
Unigene0060290	Wdfy3	PREDICTED: protein SPIRRIG [Vitis vinifera]	-	-	-	-
Unigene0060307	GAE6	PREDICTED: UDP-glucuronate 4-epimerase 6 [Vitis vinifera]	ko01100//Metabolic pathways//Global and Overview//Metabolism;ko00500//Starch and sucrose metabolism//Carbohydrate metabolism//Metabolism;ko00520//Amino sugar and nucleotide sugar metabolism//Carbohydrate metabolism//Metabolism	GO:0016020//membrane;GO:0005623//cell;GO:0098588//bounding membrane of organelle;GO:0012505//endomembrane system;GO:0043231//intracellular membrane-bounded organelle;GO:0044422//organelle part;GO:0043227//membrane-bounded organelle;GO:0031984//organelle subcompartment;GO:0005622//intracellular;GO:0044431//Golgi apparatus part;GO:0044424//intracellular part;GO:0005794//Golgi apparatus;GO:0000139//…	GO:0016857//racemase and epimerase activity, acting on carbohydrates and derivatives;GO:0003824//catalytic activity;GO:0005488//binding;GO:0016854//racemase and epimerase activity;GO:0048037//cofactor binding;GO:0016853//isomerase activity	GO:0006586//indolalkylamine metabolic process;GO:0044106//cellular amine metabolic process;GO:0009850//auxin metabolic process;GO:0071704//organic substance metabolic process;GO:0009987//cellular process;GO:0009683//indoleacetic acid metabolic process;GO:0006520//cellular amino acid metabolic process;GO:0006807//nitrogen compound metabolic process;GO:0032787//monocarboxylic acid metabolic process…
Unigene0060319	-	Protein split ends [Anthurium amnicola]	-	-	-	-
Unigene0060322	CYP38	PREDICTED: peptidyl-prolyl cis-trans isomerase CYP38, chloroplastic [Cicer arietinum]	-	-	-	-
Unigene0060328	-	PREDICTED: uncharacterized protein LOC100266278 isoform X1 [Vitis vinifera]	-	-	-	-
Unigene0060366	DI19-3	PREDICTED: protein DEHYDRATION-INDUCED 19 homolog 2 isoform X3 [Elaeis guineensis]	-	-	-	-
Unigene0060384	TTC7B	PREDICTED: tetratricopeptide repeat protein 7A [Vitis vinifera]	-	GO:0016020//membrane	-	-
Unigene0060511	PUB44	PREDICTED: U-box domain-containing protein 43 [Vitis vinifera]	-	-	GO:0003824//catalytic activity	GO:0043412//macromolecule modification;GO:0044238//primary metabolic process;GO:0043170//macromolecule metabolic process;GO:0071704//organic substance metabolic process;GO:0044237//cellular metabolic process;GO:0044267//cellular protein metabolic process;GO:0070647//protein modification by small protein conjugation or removal;GO:0008152//metabolic process;GO:0036211//protein modification process;…
Unigene0060589	IRE1B	PREDICTED: serine/threonine-protein kinase/endoribonuclease IRE1a [Vitis vinifera]	ko04141//Protein processing in endoplasmic reticulum//Folding, sorting and degradation//Genetic Information Processing	-	GO:0016772//transferase activity, transferring phosphorus-containing groups;GO:0016301//kinase activity;GO:0016740//transferase activity;GO:0003824//catalytic activity	GO:0009987//cellular process;GO:0044238//primary metabolic process;GO:0071704//organic substance metabolic process;GO:0043170//macromolecule metabolic process;GO:0008152//metabolic process;GO:0044260//cellular macromolecule metabolic process;GO:0044237//cellular metabolic process
Unigene0060596	ERECTA	PREDICTED: LRR receptor-like serine/threonine-protein kinase ERECTA [Nelumbo nucifera]	-	GO:0043227//membrane-bounded organelle;GO:0043229//intracellular organelle;GO:0031224//intrinsic component of membrane;GO:0043226//organelle;GO:0043231//intracellular membrane-bounded organelle;GO:0044464//cell part;GO:0044425//membrane part;GO:0005622//intracellular;GO:0044424//intracellular part;GO:0005623//cell;GO:0016020//membrane	GO:0016491//oxidoreductase activity;GO:0036094//small molecule binding;GO:0005488//binding;GO:0016627//oxidoreductase activity, acting on the CH-CH group of donors;GO:0001883//purine nucleoside binding;GO:0032550//purine ribonucleoside binding;GO:0016628//oxidoreductase activity, acting on the CH-CH group of donors, NAD or NADP as acceptor;GO:0097367//carbohydrate derivative binding;GO:0032549//r…	GO:0009791//post-embryonic development;GO:0036211//protein modification process;GO:0007389//pattern specification process;GO:0043207//response to external biotic stimulus;GO:0009943//adaxial/abaxial axis specification;GO:0051707//response to other organism;GO:0042440//pigment metabolic process;GO:0009617//response to bacterium;GO:0048513//animal organ development;GO:0044699//single-organism proce…
Unigene0060597	ERECTA	PREDICTED: LRR receptor-like serine/threonine-protein kinase ERECTA [Nelumbo nucifera]	-	-	GO:0003824//catalytic activity;GO:0016772//transferase activity, transferring phosphorus-containing groups;GO:0016740//transferase activity;GO:0004672//protein kinase activity;GO:0016301//kinase activity;GO:0016773//phosphotransferase activity, alcohol group as acceptor	GO:0065007//biological regulation;GO:0008152//metabolic process;GO:0009987//cellular process;GO:0032501//multicellular organismal process;GO:0007275//multicellular organism development;GO:0050789//regulation of biological process;GO:0044699//single-organism process;GO:0048731//system development;GO:0006950//response to stress;GO:0050896//response to stimulus;GO:0044767//single-organism developmen…
Unigene0060648	CYCL1-1	PREDICTED: cyclin-L1-1-like [Nelumbo nucifera]	-	-	-	-
Unigene0060726	-	PREDICTED: switch-associated protein 70 isoform X1 [Nelumbo nucifera]	-	GO:0044464//cell part;GO:0030312//external encapsulating structure;GO:0071944//cell periphery;GO:0005623//cell;GO:0005618//cell wall	-	-
Unigene0060731	DRT111	PREDICTED: DNA-damage-repair/toleration protein DRT111, chloroplastic [Elaeis guineensis]	ko03040//Spliceosome//Transcription//Genetic Information Processing	GO:0043226//organelle;GO:0043227//membrane-bounded organelle;GO:0044464//cell part;GO:0044424//intracellular part;GO:0005622//intracellular;GO:0009536//plastid;GO:0043229//intracellular organelle;GO:0043231//intracellular membrane-bounded organelle;GO:0005623//cell;GO:0005737//cytoplasm;GO:0044444//cytoplasmic part	GO:1901363//heterocyclic compound binding;GO:0005488//binding;GO:0003676//nucleic acid binding;GO:0097159//organic cyclic compound binding	GO:0006355//regulation of transcription, DNA-templated;GO:0008152//metabolic process;GO:0051716//cellular response to stimulus;GO:0000725//recombinational repair;GO:0065007//biological regulation;GO:0044267//cellular protein metabolic process;GO:0032502//developmental process;GO:0033554//cellular response to stress;GO:0019222//regulation of metabolic process;GO:0031326//regulation of cellular bio…
Unigene0060788	-	--	-	-	-	-
Unigene0060803	-	--	-	-	-	-
Unigene0060815	-	--	-	-	-	-
Unigene0060816	PP2C	phosphatase 2C (PP2C)-like protein [Corchorus capsularis]	-	-	GO:0016791//phosphatase activity;GO:0016788//hydrolase activity, acting on ester bonds;GO:0003824//catalytic activity;GO:0005488//binding;GO:0043167//ion binding;GO:0004721//phosphoprotein phosphatase activity;GO:0043169//cation binding;GO:0042578//phosphoric ester hydrolase activity;GO:0016787//hydrolase activity	GO:0044260//cellular macromolecule metabolic process;GO:0043412//macromolecule modification;GO:0044237//cellular metabolic process;GO:0071704//organic substance metabolic process;GO:0036211//protein modification process;GO:0019538//protein metabolic process;GO:0008152//metabolic process;GO:0044267//cellular protein metabolic process;GO:0006464//cellular protein modification process;GO:0009987//ce…
Unigene0060915	TMN12	EMP70 domain-containing protein [Cephalotus follicularis]	-	GO:0043229//intracellular organelle;GO:0030054//cell junction;GO:0031090//organelle membrane;GO:0044422//organelle part;GO:0044446//intracellular organelle part;GO:0043226//organelle;GO:0043227//membrane-bounded organelle;GO:0005911//cell-cell junction;GO:0044425//membrane part;GO:0005622//intracellular;GO:0016020//membrane;GO:0043231//intracellular membrane-bounded organelle;GO:0031984//organell…	-	-
Unigene0060927	RPL18B	PREDICTED: 60S ribosomal protein L18-2 [Vitis vinifera]	ko03010//Ribosome//Translation//Genetic Information Processing	GO:0044464//cell part;GO:0032991//macromolecular complex;GO:0005622//intracellular;GO:1990904//ribonucleoprotein complex;GO:0044424//intracellular part;GO:0005623//cell;GO:0030529//intracellular ribonucleoprotein complex	-	GO:0071704//organic substance metabolic process;GO:0008152//metabolic process;GO:0043170//macromolecule metabolic process;GO:0010467//gene expression
Unigene0060952	SSRP1	PREDICTED: FACT complex subunit SSRP1 [Ziziphus jujuba]	-	GO:0005622//intracellular;GO:0044464//cell part;GO:0043226//organelle;GO:0005623//cell;GO:0043227//membrane-bounded organelle;GO:0044424//intracellular part;GO:0043229//intracellular organelle;GO:0043231//intracellular membrane-bounded organelle	GO:0003824//catalytic activity;GO:0016491//oxidoreductase activity;GO:0016627//oxidoreductase activity, acting on the CH-CH group of donors;GO:0016628//oxidoreductase activity, acting on the CH-CH group of donors, NAD or NADP as acceptor	GO:0044699//single-organism process;GO:0044710//single-organism metabolic process;GO:0008152//metabolic process
Unigene0060954	SSRP1	FACT complex subunit SSRP1 [Ananas comosus]	-	GO:0005623//cell;GO:0044424//intracellular part;GO:0043231//intracellular membrane-bounded organelle;GO:0043227//membrane-bounded organelle;GO:0044464//cell part;GO:0005622//intracellular;GO:0043226//organelle;GO:0043229//intracellular organelle	GO:0003824//catalytic activity;GO:0016628//oxidoreductase activity, acting on the CH-CH group of donors, NAD or NADP as acceptor;GO:0016627//oxidoreductase activity, acting on the CH-CH group of donors;GO:0016491//oxidoreductase activity	GO:0008152//metabolic process;GO:0044710//single-organism metabolic process;GO:0044699//single-organism process
Unigene0060968	MSSP2	PREDICTED: monosaccharide-sensing protein 2 [Nelumbo nucifera]	-	GO:0016020//membrane;GO:0044425//membrane part;GO:0031224//intrinsic component of membrane	GO:0016627//oxidoreductase activity, acting on the CH-CH group of donors;GO:0003824//catalytic activity;GO:0005215//transporter activity;GO:0022857//transmembrane transporter activity;GO:0016491//oxidoreductase activity;GO:0016628//oxidoreductase activity, acting on the CH-CH group of donors, NAD or NADP as acceptor	GO:0044699//single-organism process;GO:0044763//single-organism cellular process;GO:1902578//single-organism localization;GO:0008152//metabolic process;GO:0006810//transport;GO:0051179//localization;GO:0044710//single-organism metabolic process;GO:0044765//single-organism transport;GO:0009987//cellular process;GO:0051234//establishment of localization
Unigene0060970	MSSP2	PREDICTED: monosaccharide-sensing protein 2-like [Phoenix dactylifera]	-	GO:0031224//intrinsic component of membrane;GO:0044425//membrane part;GO:0016020//membrane	GO:0005215//transporter activity;GO:0022857//transmembrane transporter activity	GO:0051179//localization;GO:0044699//single-organism process;GO:0009987//cellular process;GO:0044763//single-organism cellular process;GO:0051234//establishment of localization
Unigene0061001	TULP5	PREDICTED: tubby-like F-box protein 5 [Ziziphus jujuba]	-	GO:0044464//cell part;GO:0043231//intracellular membrane-bounded organelle;GO:0016020//membrane;GO:0043227//membrane-bounded organelle;GO:0044444//cytoplasmic part;GO:0044424//intracellular part;GO:0005737//cytoplasm;GO:0043226//organelle;GO:0005623//cell;GO:0005622//intracellular;GO:0043229//intracellular organelle	-	GO:0065007//biological regulation;GO:0010468//regulation of gene expression;GO:0051707//response to other organism;GO:0050789//regulation of biological process;GO:0009605//response to external stimulus;GO:0019222//regulation of metabolic process;GO:0009607//response to biotic stimulus;GO:0051704//multi-organism process;GO:0043207//response to external biotic stimulus;GO:0050896//response to stimu…
Unigene0061005	MRE11	PREDICTED: double-strand break repair protein MRE11-like [Elaeis guineensis]	ko03440//Homologous recombination//Replication and repair//Genetic Information Processing;ko03450//Non-homologous end-joining//Replication and repair//Genetic Information Processing	GO:0043227//membrane-bounded organelle;GO:0043231//intracellular membrane-bounded organelle;GO:0005623//cell;GO:0043229//intracellular organelle;GO:0044464//cell part;GO:0005622//intracellular;GO:0043226//organelle;GO:0044424//intracellular part	GO:0046872//metal ion binding;GO:0043169//cation binding;GO:0004518//nuclease activity;GO:0043167//ion binding;GO:0046914//transition metal ion binding;GO:0005488//binding;GO:0016787//hydrolase activity;GO:0003824//catalytic activity;GO:0016788//hydrolase activity, acting on ester bonds	GO:0006950//response to stress;GO:0044238//primary metabolic process;GO:0090304//nucleic acid metabolic process;GO:0033554//cellular response to stress;GO:0044699//single-organism process;GO:0044260//cellular macromolecule metabolic process;GO:0007049//cell cycle;GO:0071704//organic substance metabolic process;GO:0051716//cellular response to stimulus;GO:0008152//metabolic process;GO:0006281//DNA…
Unigene0061023	ACBP4	PREDICTED: acyl-CoA-binding domain-containing protein 4-like isoform X2 [Nelumbo nucifera]	-	-	-	-
Unigene0061058	RF2b	PREDICTED: probable serine/threonine-protein kinase mps1 [Nelumbo nucifera]	-	-	-	-
Unigene0061064	CHI3	chalcone flavonone isomerase [Prunus persica]	-	-	GO:0003824//catalytic activity;GO:0016872//intramolecular lyase activity;GO:0016853//isomerase activity	GO:0008152//metabolic process;GO:0009812//flavonoid metabolic process;GO:0009416//response to light stimulus;GO:0042221//response to chemical;GO:1901700//response to oxygen-containing compound;GO:0034285//response to disaccharide;GO:0009743//response to carbohydrate;GO:0009411//response to UV;GO:0010033//response to organic substance;GO:0009628//response to abiotic stimulus;GO:0050896//response t…
Unigene0061175	ccmE	PREDICTED: cytochrome c-type biogenesis protein CcmE-like [Ziziphus jujuba]	-	-	-	-
Unigene0061196	TSO1	PREDICTED: CRC domain-containing protein TSO1-like [Nelumbo nucifera]	-	-	-	-
Unigene0061280	ARF3	PREDICTED: auxin response factor 15-like isoform X4 [Phoenix dactylifera]	ko04075//Plant hormone signal transduction//Signal transduction//Environmental Information Processing	-	-	GO:0065007//biological regulation;GO:0044237//cellular metabolic process;GO:0007275//multicellular organism development;GO:0008152//metabolic process;GO:0010033//response to organic substance;GO:0009987//cellular process;GO:0042221//response to chemical;GO:0032502//developmental process;GO:0044767//single-organism developmental process;GO:0009791//post-embryonic development;GO:0050789//regulation…
Unigene0061302	PERK13	Proline-rich receptor-like protein kinase PERK12 [Anthurium amnicola]	-	-	GO:0016740//transferase activity;GO:0016772//transferase activity, transferring phosphorus-containing groups;GO:0003824//catalytic activity	-
Unigene0061368	TULP3	PREDICTED: tubby-like F-box protein 3 [Nelumbo nucifera]	-	-	-	-
Unigene0061371	RPP13L4	PREDICTED: disease resistance RPP13-like protein 4 [Phoenix dactylifera]	-	-	-	-
Unigene0061372	RPP13L4	PREDICTED: disease resistance RPP13-like protein 4 [Phoenix dactylifera]	-	-	-	-
Unigene0061373	-	--	-	-	-	-
Unigene0061438	BHLH48	PREDICTED: transcription factor bHLH48 isoform X2 [Elaeis guineensis]	-	-	-	-
Unigene0061442	VTC5	GDP-L-galactose phosphorylase [Actinidia eriantha]	ko01100//Metabolic pathways//Global and Overview//Metabolism;ko01110//Biosynthesis of secondary metabolites//Global and Overview//Metabolism;ko00053//Ascorbate and aldarate metabolism//Carbohydrate metabolism//Metabolism	-	GO:0016758//transferase activity, transferring hexosyl groups;GO:0016772//transferase activity, transferring phosphorus-containing groups;GO:0016757//transferase activity, transferring glycosyl groups;GO:0016740//transferase activity;GO:0003824//catalytic activity;GO:0004645//phosphorylase activity	-
Unigene0061502	-	PREDICTED: homeobox-DDT domain protein RLT2-like isoform X1 [Nelumbo nucifera]	-	-	-	-
Unigene0061504	PF13_0198	PREDICTED: homeobox-DDT domain protein RLT2 isoform X2 [Nelumbo nucifera]	-	-	-	-
Unigene0061544	Apeh	PREDICTED: acylamino-acid-releasing enzyme 1 isoform X1 [Elaeis guineensis]	-	GO:0044464//cell part;GO:0043227//membrane-bounded organelle;GO:0044424//intracellular part;GO:0005622//intracellular;GO:0043226//organelle;GO:0044444//cytoplasmic part;GO:0005623//cell;GO:0043231//intracellular membrane-bounded organelle;GO:0005737//cytoplasm;GO:0043229//intracellular organelle	GO:0016787//hydrolase activity;GO:0008233//peptidase activity;GO:0003824//catalytic activity;GO:0070011//peptidase activity, acting on L-amino acid peptides	-
Unigene0061560	CCC1	cation-chloride cotransporter 1 isoform X1 [Ananas comosus]	-	-	-	-
Unigene0061561	CCC1	cation-chloride cotransporter 1 isoform X1 [Ananas comosus]	-	-	-	-
Unigene0061580	AAP3	PREDICTED: amino acid permease 3 [Nelumbo nucifera]	-	GO:0031224//intrinsic component of membrane;GO:0016020//membrane;GO:0044425//membrane part	-	-
Unigene0061582	XLG3	PREDICTED: uncharacterized protein LOC104600320 [Nelumbo nucifera]	-	-	-	-
Unigene0061635	AGPP	PREDICTED: glucose-1-phosphate adenylyltransferase small subunit, chloroplastic/amyloplastic [Phoenix dactylifera]	ko01100//Metabolic pathways//Global and Overview//Metabolism;ko01110//Biosynthesis of secondary metabolites//Global and Overview//Metabolism;ko00500//Starch and sucrose metabolism//Carbohydrate metabolism//Metabolism;ko00520//Amino sugar and nucleotide sugar metabolism//Carbohydrate metabolism//Metabolism	-	-	-
Unigene0061643	-	--	-	-	-	-
Unigene0061694	aip1	stress protein, partial [Anthurium amnicola]	-	-	-	-
Unigene0061729	-	PREDICTED: trichohyalin [Nelumbo nucifera]	-	-	-	-
Unigene0061772	LNG1	PREDICTED: protein LONGIFOLIA 1-like [Nelumbo nucifera]	-	-	-	-
Unigene0061773	LNG1	PREDICTED: protein LONGIFOLIA 1-like [Nelumbo nucifera]	-	-	-	-
Unigene0061791	TUBB7	PREDICTED: tubulin beta chain [Vigna radiata var. radiata] [Vigna radiata]	ko04145//Phagosome//Transport and catabolism//Cellular Processes	GO:0043229//intracellular organelle;GO:0032991//macromolecular complex;GO:0044464//cell part;GO:0044424//intracellular part;GO:0043226//organelle;GO:0005622//intracellular;GO:0005856//cytoskeleton;GO:0043232//intracellular non-membrane-bounded organelle;GO:0015630//microtubule cytoskeleton;GO:0005623//cell;GO:0043228//non-membrane-bounded organelle	GO:0036094//small molecule binding;GO:0017111//nucleoside-triphosphatase activity;GO:0001883//purine nucleoside binding;GO:0016787//hydrolase activity;GO:0032550//purine ribonucleoside binding;GO:0003824//catalytic activity;GO:0097367//carbohydrate derivative binding;GO:0005198//structural molecule activity;GO:0097159//organic cyclic compound binding;GO:1901363//heterocyclic compound binding;GO:0…	GO:0065003//macromolecular complex assembly;GO:0034622//cellular macromolecular complex assembly;GO:0006461//protein complex assembly;GO:0044763//single-organism cellular process;GO:0071840//cellular component organization or biogenesis;GO:0043933//macromolecular complex subunit organization;GO:0044085//cellular component biogenesis;GO:0044699//single-organism process;GO:0009987//cellular process…
Unigene0061797	-	Aminomethyl 32 [Prunus persica var. persica] [Prunus persica]	-	GO:0005737//cytoplasm;GO:0044464//cell part;GO:0044446//intracellular organelle part;GO:0005623//cell;GO:0043226//organelle;GO:0044424//intracellular part;GO:0005622//intracellular;GO:0044429//mitochondrial part;GO:0044422//organelle part;GO:0043231//intracellular membrane-bounded organelle;GO:0043229//intracellular organelle;GO:0005739//mitochondrion;GO:0043227//membrane-bounded organelle;GO:004…	-	GO:0006082//organic acid metabolic process;GO:0032787//monocarboxylic acid metabolic process;GO:0071704//organic substance metabolic process;GO:0008152//metabolic process;GO:0006520//cellular amino acid metabolic process;GO:0009069//serine family amino acid metabolic process;GO:1901615//organic hydroxy compound metabolic process;GO:0019752//carboxylic acid metabolic process;GO:0044281//small mole…
Unigene0061851	-	PREDICTED: uncharacterized protein LOC104609245 [Nelumbo nucifera]	-	-	-	-
Unigene0061893	At2g20760	PREDICTED: clathrin light chain 2 [Elaeis guineensis]	-	-	-	-
Unigene0061894	Os04g0679100	PREDICTED: clathrin light chain 2 [Elaeis guineensis]	-	-	-	-
Unigene0062009	LPEAT2	PREDICTED: lysophospholipid acyltransferase LPEAT2 isoform X2 [Nelumbo nucifera]	ko01100//Metabolic pathways//Global and Overview//Metabolism;ko00564//Glycerophospholipid metabolism//Lipid metabolism//Metabolism;ko00565//Ether lipid metabolism//Lipid metabolism//Metabolism	GO:0044425//membrane part;GO:0031224//intrinsic component of membrane;GO:0016020//membrane	GO:0003824//catalytic activity;GO:0016746//transferase activity, transferring acyl groups;GO:0016747//transferase activity, transferring acyl groups other than amino-acyl groups;GO:0016740//transferase activity	GO:0006796//phosphate-containing compound metabolic process;GO:0044238//primary metabolic process;GO:0044237//cellular metabolic process;GO:0006793//phosphorus metabolic process;GO:0044710//single-organism metabolic process;GO:0046486//glycerolipid metabolic process;GO:0008152//metabolic process;GO:0006650//glycerophospholipid metabolic process;GO:0046471//phosphatidylglycerol metabolic process;G…
Unigene0062012	-	PREDICTED: lysophospholipid acyltransferase LPEAT2-like [Arachis ipaensis]	ko01100//Metabolic pathways//Global and Overview//Metabolism;ko00564//Glycerophospholipid metabolism//Lipid metabolism//Metabolism;ko00565//Ether lipid metabolism//Lipid metabolism//Metabolism	-	-	GO:0006629//lipid metabolic process;GO:0044699//single-organism process;GO:0008152//metabolic process;GO:0044238//primary metabolic process;GO:0071704//organic substance metabolic process;GO:0044710//single-organism metabolic process
Unigene0062014	-	PREDICTED: lysophospholipid acyltransferase LPEAT2-like [Arachis ipaensis]	ko01100//Metabolic pathways//Global and Overview//Metabolism;ko00564//Glycerophospholipid metabolism//Lipid metabolism//Metabolism;ko00565//Ether lipid metabolism//Lipid metabolism//Metabolism	-	-	-
Unigene0062071	PALD1	PREDICTED: paladin isoform X2 [Nelumbo nucifera]	-	-	-	-
Unigene0062076	At2g30620	PREDICTED: histone H1-like [Nelumbo nucifera]	-	-	-	-
Unigene0062159	-	--	-	-	-	-
Unigene0062175	SMC1	structural maintenance of chromosomes protein 1, partial [Chimonanthus praecox]	-	GO:0043231//intracellular membrane-bounded organelle;GO:0044424//intracellular part;GO:0005623//cell;GO:0043232//intracellular non-membrane-bounded organelle;GO:0043229//intracellular organelle;GO:0043227//membrane-bounded organelle;GO:0005622//intracellular;GO:0043228//non-membrane-bounded organelle;GO:0044464//cell part;GO:0043226//organelle;GO:0032991//macromolecular complex;GO:0043234//protei…	GO:0001883//purine nucleoside binding;GO:1901363//heterocyclic compound binding;GO:0005488//binding;GO:0005515//protein binding;GO:0097367//carbohydrate derivative binding;GO:0032549//ribonucleoside binding;GO:0036094//small molecule binding;GO:0097159//organic cyclic compound binding;GO:0032550//purine ribonucleoside binding;GO:0046983//protein dimerization activity;GO:0001882//nucleoside binding	GO:0044260//cellular macromolecule metabolic process;GO:0043170//macromolecule metabolic process;GO:0044763//single-organism cellular process;GO:0044237//cellular metabolic process;GO:1901360//organic cyclic compound metabolic process;GO:0006259//DNA metabolic process;GO:0000280//nuclear division;GO:0051716//cellular response to stimulus;GO:0071704//organic substance metabolic process;GO:0006807/…
Unigene0062176	XBAT33	PREDICTED: E3 ubiquitin-protein ligase XBAT33 isoform X1 [Vitis vinifera]	-	-	GO:0043167//ion binding;GO:0005488//binding;GO:0003824//catalytic activity;GO:0019787//ubiquitin-like protein transferase activity;GO:0016740//transferase activity;GO:0043169//cation binding	GO:0036211//protein modification process;GO:0044267//cellular protein metabolic process;GO:0019538//protein metabolic process;GO:0032446//protein modification by small protein conjugation;GO:0044238//primary metabolic process;GO:0043170//macromolecule metabolic process;GO:0044237//cellular metabolic process;GO:0044260//cellular macromolecule metabolic process;GO:0006464//cellular protein modifica…
Unigene0062193	-	PREDICTED: transmembrane protein 53-like isoform X1 [Nelumbo nucifera]	-	-	-	-
Unigene0062243	SBEII	PREDICTED: 1,4-alpha-glucan-branching enzyme 1, chloroplastic/amyloplastic isoform X1 [Vitis vinifera]	ko01100//Metabolic pathways//Global and Overview//Metabolism;ko01110//Biosynthesis of secondary metabolites//Global and Overview//Metabolism;ko00500//Starch and sucrose metabolism//Carbohydrate metabolism//Metabolism	-	GO:0016798//hydrolase activity, acting on glycosyl bonds;GO:0016740//transferase activity;GO:0005488//binding;GO:0016757//transferase activity, transferring glycosyl groups;GO:0016787//hydrolase activity;GO:0043167//ion binding;GO:0016758//transferase activity, transferring hexosyl groups;GO:0003824//catalytic activity	GO:0071704//organic substance metabolic process;GO:0044262//cellular carbohydrate metabolic process;GO:0009987//cellular process;GO:0044264//cellular polysaccharide metabolic process;GO:0006073//cellular glucan metabolic process;GO:0044238//primary metabolic process;GO:0005975//carbohydrate metabolic process;GO:0008152//metabolic process;GO:0006112//energy reserve metabolic process;GO:0043170//ma…
Unigene0062274	-	--	-	-	-	-
Unigene0062275	-	--	-	-	-	-
Unigene0062276	NFYA8	PREDICTED: nuclear transcription factor Y subunit A-3-like isoform X1 [Nelumbo nucifera]	-	-	-	-
Unigene0062318	tbl1xr1-b	PREDICTED: F-box-like/WD repeat-containing protein TBL1XR1 [Nelumbo nucifera]	-	-	-	-
Unigene0062319	tbl1xr1-b	PREDICTED: F-box-like/WD repeat-containing protein TBL1XR1 [Nelumbo nucifera]	-	-	-	-
Unigene0062346	CPN60A1	PREDICTED: ruBisCO large subunit-binding protein subunit alpha [Vitis vinifera]	-	GO:0005622//intracellular;GO:0044424//intracellular part;GO:0005623//cell;GO:0044464//cell part	GO:0001883//purine nucleoside binding;GO:0032550//purine ribonucleoside binding;GO:1901363//heterocyclic compound binding;GO:0005488//binding;GO:0097367//carbohydrate derivative binding;GO:0032549//ribonucleoside binding;GO:0097159//organic cyclic compound binding;GO:0001882//nucleoside binding;GO:0036094//small molecule binding	GO:0006457//protein folding;GO:0009987//cellular process
Unigene0062452	SLC25A16	PREDICTED: mitochondrial substrate carrier family protein P-like [Nelumbo nucifera]	-	GO:0031224//intrinsic component of membrane;GO:0044425//membrane part;GO:0016020//membrane	-	GO:0044699//single-organism process;GO:0044763//single-organism cellular process;GO:0009987//cellular process
Unigene0062498	MODA	PREDICTED: NADP-dependent malic enzyme isoform X2 [Nelumbo nucifera]	ko01100//Metabolic pathways//Global and Overview//Metabolism;ko01120//Microbial metabolism in diverse environments//Global and Overview//Metabolism;ko01200//Carbon metabolism//Global and Overview//Metabolism;ko00620//Pyruvate metabolism//Carbohydrate metabolism//Metabolism;ko00710//Carbon fixation in photosynthetic organisms//Energy metabolism//Metabolism	GO:0043226//organelle;GO:0044444//cytoplasmic part;GO:0009536//plastid;GO:0044424//intracellular part;GO:0044464//cell part;GO:0043231//intracellular membrane-bounded organelle;GO:0043229//intracellular organelle;GO:0043227//membrane-bounded organelle;GO:0005623//cell;GO:0005737//cytoplasm;GO:0005622//intracellular	GO:0043167//ion binding;GO:0043169//cation binding;GO:0016614//oxidoreductase activity, acting on CH-OH group of donors;GO:0005488//binding;GO:0016491//oxidoreductase activity;GO:0016615//malate dehydrogenase activity;GO:1901363//heterocyclic compound binding;GO:0097159//organic cyclic compound binding;GO:0046983//protein dimerization activity;GO:0046872//metal ion binding;GO:1901265//nucleoside …	GO:0016043//cellular component organization;GO:0005975//carbohydrate metabolic process;GO:0019318//hexose metabolic process;GO:0030163//protein catabolic process;GO:0044699//single-organism process;GO:0006508//proteolysis;GO:0006461//protein complex assembly;GO:0051259//protein oligomerization;GO:0043436//oxoacid metabolic process;GO:1901575//organic substance catabolic process;GO:0071840//cellul…
Unigene0062512	DELTA-ADR	PREDICTED: AP-3 complex subunit delta [Nelumbo nucifera]	-	GO:0005623//cell;GO:0044424//intracellular part;GO:0005622//intracellular;GO:0044464//cell part	-	GO:0016043//cellular component organization;GO:0016192//vesicle-mediated transport;GO:0045184//establishment of protein localization;GO:0051234//establishment of localization;GO:0071702//organic substance transport;GO:0007033//vacuole organization;GO:0046907//intracellular transport;GO:0051649//establishment of localization in cell;GO:0033036//macromolecule localization;GO:0051179//localization;G…
Unigene0062515	AGAL1	alpha-galactosidase [Chimonanthus praecox]	ko00561//Glycerolipid metabolism//Lipid metabolism//Metabolism;ko00052//Galactose metabolism//Carbohydrate metabolism//Metabolism;ko00600//Sphingolipid metabolism//Lipid metabolism//Metabolism;ko00603//Glycosphingolipid biosynthesis - globo series//Glycan biosynthesis and metabolism//Metabolism	-	GO:0003824//catalytic activity;GO:0015925//galactosidase activity;GO:0016798//hydrolase activity, acting on glycosyl bonds;GO:0004557//alpha-galactosidase activity;GO:0004553//hydrolase activity, hydrolyzing O-glycosyl compounds;GO:0016787//hydrolase activity	GO:0008152//metabolic process;GO:0044238//primary metabolic process
Unigene0062517	AGAL1	alpha-galactosidase [Chimonanthus praecox]	ko00561//Glycerolipid metabolism//Lipid metabolism//Metabolism;ko00052//Galactose metabolism//Carbohydrate metabolism//Metabolism;ko00600//Sphingolipid metabolism//Lipid metabolism//Metabolism;ko00603//Glycosphingolipid biosynthesis - globo series//Glycan biosynthesis and metabolism//Metabolism	-	-	-
Unigene0062562	azo1574	PREDICTED: selenoprotein O [Jatropha curcas]	-	-	-	-
Unigene0062573	RABH1B	PREDICTED: ras-related protein RABH1b [Amborella trichopoda]	-	GO:0031090//organelle membrane;GO:0044444//cytoplasmic part;GO:0044422//organelle part;GO:0031984//organelle subcompartment;GO:0043231//intracellular membrane-bounded organelle;GO:0044446//intracellular organelle part;GO:0005911//cell-cell junction;GO:0005622//intracellular;GO:0016020//membrane;GO:0005623//cell;GO:0044464//cell part;GO:0043226//organelle;GO:0005737//cytoplasm;GO:0044424//intracel…	GO:0032550//purine ribonucleoside binding;GO:0001883//purine nucleoside binding;GO:0097159//organic cyclic compound binding;GO:0032549//ribonucleoside binding;GO:0001882//nucleoside binding;GO:1901363//heterocyclic compound binding;GO:0005488//binding;GO:0097367//carbohydrate derivative binding;GO:0036094//small molecule binding;GO:0003824//catalytic activity	GO:0065007//biological regulation;GO:0008104//protein localization;GO:0051179//localization;GO:0033036//macromolecule localization;GO:0048193//Golgi vesicle transport;GO:0007165//signal transduction;GO:0046907//intracellular transport;GO:0009987//cellular process;GO:0044699//single-organism process;GO:0050789//regulation of biological process;GO:1902578//single-organism localization;GO:0044700//s…
Unigene0062614	-	--	-	-	-	-
Unigene0062616	DRB4	PREDICTED: double-stranded RNA-binding protein 4 isoform X3 [Vitis vinifera]	-	-	-	-
Unigene0062628	-	PREDICTED: ubinuclein-1-like isoform X1 [Nelumbo nucifera]	-	-	-	-
Unigene0062635	SPL16	PREDICTED: squamosa promoter-binding-like protein 16 [Phoenix dactylifera]	-	-	-	-
Unigene0062726	ETO1	PREDICTED: ethylene-overproduction protein 1 [Nelumbo nucifera]	-	-	GO:0005515//protein binding;GO:0005488//binding	GO:0003006//developmental process involved in reproduction;GO:0044260//cellular macromolecule metabolic process;GO:0043170//macromolecule metabolic process;GO:0030163//protein catabolic process;GO:0099402//plant organ development;GO:0042594//response to starvation;GO:0000003//reproduction;GO:0009057//macromolecule catabolic process;GO:0043632//modification-dependent macromolecule catabolic proces…
Unigene0062755	ILL7	PREDICTED: IAA-amino acid hydrolase ILR1-like 3 [Elaeis guineensis]	-	-	GO:0016810//hydrolase activity, acting on carbon-nitrogen (but not peptide) bonds;GO:0016787//hydrolase activity;GO:0003824//catalytic activity;GO:0016811//hydrolase activity, acting on carbon-nitrogen (but not peptide) bonds, in linear amides	-
Unigene0062763	TOC159	PREDICTED: translocase of chloroplast 159, chloroplastic-like [Phoenix dactylifera]	-	-	-	-
Unigene0062816	EXPA11	expansin [Chimonanthus praecox]	-	GO:0030312//external encapsulating structure;GO:0071944//cell periphery;GO:0005623//cell;GO:0044464//cell part	-	GO:0045229//external encapsulating structure organization;GO:0071840//cellular component organization or biogenesis;GO:0071554//cell wall organization or biogenesis;GO:0016043//cellular component organization;GO:0071555//cell wall organization;GO:0009987//cellular process
Unigene0062920	pvaA	PREDICTED: polyvinylalcohol dehydrogenase-like [Prunus mume]	-	-	-	-
Unigene0062948	rpsA	30S ribosomal protein S1 [Anthurium amnicola]	-	-	-	GO:1901362//organic cyclic compound biosynthetic process;GO:0046483//heterocycle metabolic process;GO:0044711//single-organism biosynthetic process;GO:0006996//organelle organization;GO:0019752//carboxylic acid metabolic process;GO:0044255//cellular lipid metabolic process;GO:1901564//organonitrogen compound metabolic process;GO:0044238//primary metabolic process;GO:0006807//nitrogen compound met…
Unigene0062960	At1g55630	PREDICTED: pentatricopeptide repeat-containing protein At3g60050-like [Nelumbo nucifera]	-	-	-	-
Unigene0062980	FAM214A	Protein FAM214B [Anthurium amnicola]	-	-	-	-
Unigene0062988	RPOT2-TOM	PREDICTED: DNA-directed RNA polymerase 2B, chloroplastic/mitochondrial-like [Nelumbo nucifera]	-	-	-	-
Unigene0063021	BSL1	Serine/threonine-protein phosphatase PP1, partial [Anthurium amnicola]	-	-	-	-
Unigene0063023	BSL1	Calcineurin-like metallo-phosphoesterase superfamily protein [Zea mays]	-	-	-	-
Unigene0063122	Os02g0793000	PREDICTED: zinc finger CCCH domain-containing protein 18 [Elaeis guineensis]	-	-	-	-
Unigene0063138	HAT14	PREDICTED: homeobox-leucine zipper protein HOX11-like [Nelumbo nucifera]	-	GO:0043227//membrane-bounded organelle;GO:0043229//intracellular organelle;GO:0043226//organelle;GO:0044464//cell part;GO:0005622//intracellular;GO:0005623//cell;GO:0044424//intracellular part;GO:0043231//intracellular membrane-bounded organelle	GO:0005488//binding;GO:0097159//organic cyclic compound binding;GO:1901363//heterocyclic compound binding;GO:0003677//DNA binding;GO:0001071//nucleic acid binding transcription factor activity;GO:0003676//nucleic acid binding	GO:0050789//regulation of biological process;GO:0010468//regulation of gene expression;GO:0009058//biosynthetic process;GO:0071704//organic substance metabolic process;GO:0009059//macromolecule biosynthetic process;GO:0019222//regulation of metabolic process;GO:0008152//metabolic process;GO:0065007//biological regulation;GO:0009987//cellular process;GO:0043170//macromolecule metabolic process;GO:…
Unigene0063148	-	PREDICTED: CLK4-associating serine/arginine rich protein isoform X2 [Juglans regia]	-	-	-	-
Unigene0063149	CLASRP	PREDICTED: CLK4-associating serine/arginine rich protein isoform X5 [Phoenix dactylifera]	-	-	-	-
Unigene0063170	CRK3	CDPK-related protein kinase [Anthurium amnicola]	ko04626//Plant-pathogen interaction//Environmental adaptation//Organismal Systems	-	-	-
Unigene0063230	Zranb3	SNF2_N domain-containing protein/Helicase_C domain-containing protein [Cephalotus follicularis]	-	-	-	-
Unigene0063312	CHUP1	PREDICTED: protein CHUP1, chloroplastic-like isoform X2 [Nelumbo nucifera]	-	-	-	-
Unigene0063317	SWI3A	PREDICTED: SWI/SNF complex subunit SWI3A isoform X2 [Vitis vinifera]	-	-	-	-
Unigene0063343	-	--	-	-	-	-
Unigene0063344	-	--	-	-	-	-
Unigene0063355	At4g32285	clathrin assembly family protein [Populus trichocarpa]	-	-	-	-
Unigene0063371	At2g44130	PREDICTED: F-box/kelch-repeat protein At2g44130-like isoform X2 [Nelumbo nucifera]	-	-	-	-
Unigene0063375	DDB_G0276689	Zinc finger FYVE domain-containing protein 26 [Anthurium amnicola]	-	-	-	-
Unigene0063400	-	PREDICTED: IQ domain-containing protein IQM3 [Phoenix dactylifera]	-	-	-	-
Unigene0063462	HT1	PREDICTED: serine/threonine-protein kinase HT1 isoform X3 [Glycine max]	-	-	GO:0097159//organic cyclic compound binding;GO:0016301//kinase activity;GO:1901363//heterocyclic compound binding;GO:0001882//nucleoside binding;GO:0004672//protein kinase activity;GO:0005488//binding;GO:0032550//purine ribonucleoside binding;GO:0003824//catalytic activity;GO:0097367//carbohydrate derivative binding;GO:0016740//transferase activity;GO:0001883//purine nucleoside binding;GO:0016773…	GO:0044267//cellular protein metabolic process;GO:0016043//cellular component organization;GO:0006996//organelle organization;GO:0044699//single-organism process;GO:0044763//single-organism cellular process;GO:0009987//cellular process;GO:0043170//macromolecule metabolic process;GO:0008152//metabolic process;GO:0006464//cellular protein modification process;GO:0044238//primary metabolic process;G…
Unigene0063466	RFC3	PREDICTED: replication factor C subunit 3 [Nelumbo nucifera]	ko03030//DNA replication//Replication and repair//Genetic Information Processing;ko03420//Nucleotide excision repair//Replication and repair//Genetic Information Processing;ko03430//Mismatch repair//Replication and repair//Genetic Information Processing	-	GO:0036094//small molecule binding;GO:0032550//purine ribonucleoside binding;GO:0001883//purine nucleoside binding;GO:0034061//DNA polymerase activity;GO:0001882//nucleoside binding;GO:0016772//transferase activity, transferring phosphorus-containing groups;GO:0005488//binding;GO:0097159//organic cyclic compound binding;GO:0016740//transferase activity;GO:0003824//catalytic activity;GO:0097367//c…	GO:0006259//DNA metabolic process;GO:0009987//cellular process;GO:0006139//nucleobase-containing compound metabolic process;GO:0006807//nitrogen compound metabolic process;GO:1901360//organic cyclic compound metabolic process;GO:0071704//organic substance metabolic process;GO:0043170//macromolecule metabolic process;GO:0034641//cellular nitrogen compound metabolic process;GO:0006725//cellular aro…
Unigene0063475	CAF1-7	PREDICTED: probable CCR4-associated factor 1 homolog 7 [Nelumbo nucifera]	ko03018//RNA degradation//Folding, sorting and degradation//Genetic Information Processing	GO:0043231//intracellular membrane-bounded organelle;GO:0043227//membrane-bounded organelle;GO:0043229//intracellular organelle;GO:0044464//cell part;GO:0043226//organelle;GO:0005622//intracellular;GO:0005623//cell;GO:0044424//intracellular part	GO:0003824//catalytic activity;GO:0016787//hydrolase activity;GO:0004518//nuclease activity;GO:0000175//3'-5'-exoribonuclease activity;GO:0004540//ribonuclease activity;GO:0016788//hydrolase activity, acting on ester bonds;GO:0004527//exonuclease activity;GO:0008408//3'-5' exonuclease activity;GO:0004532//exoribonuclease activity;GO:0016796//exonuclease activity, active with either ribo- or deoxy…	GO:0090305//nucleic acid phosphodiester bond hydrolysis;GO:0034641//cellular nitrogen compound metabolic process;GO:0044260//cellular macromolecule metabolic process;GO:0008152//metabolic process;GO:0090501//RNA phosphodiester bond hydrolysis;GO:0090304//nucleic acid metabolic process;GO:0043170//macromolecule metabolic process;GO:0016070//RNA metabolic process;GO:0006807//nitrogen compound metab…
Unigene0063488	-	--	-	-	-	-
Unigene0063489	At3g13560	PREDICTED: glucan endo-1,3-beta-glucosidase 4-like [Nelumbo nucifera]	-	GO:0031225//anchored component of membrane;GO:0016020//membrane;GO:0031224//intrinsic component of membrane;GO:0044425//membrane part	GO:0016798//hydrolase activity, acting on glycosyl bonds;GO:0004553//hydrolase activity, hydrolyzing O-glycosyl compounds;GO:0016787//hydrolase activity;GO:0003824//catalytic activity	GO:0008152//metabolic process
Unigene0063515	IAA27	PREDICTED: auxin-responsive protein IAA27 [Vitis vinifera]	ko04075//Plant hormone signal transduction//Signal transduction//Environmental Information Processing	-	-	-
Unigene0063532	PABN2	PREDICTED: polyadenylate-binding protein 2-like isoform X1 [Phoenix dactylifera]	ko03015//mRNA surveillance pathway//Translation//Genetic Information Processing	-	GO:0005488//binding;GO:0097159//organic cyclic compound binding	-
Unigene0063543	PEL1	Eukaryotic release factor 1 family protein isoform 4 [Theobroma cacao]	ko03015//mRNA surveillance pathway//Translation//Genetic Information Processing	GO:0043229//intracellular organelle;GO:0043231//intracellular membrane-bounded organelle;GO:0005623//cell;GO:0043227//membrane-bounded organelle;GO:0044424//intracellular part;GO:0044464//cell part;GO:0043226//organelle;GO:0005622//intracellular	-	GO:0044260//cellular macromolecule metabolic process;GO:0006401//RNA catabolic process;GO:0008152//metabolic process;GO:0006725//cellular aromatic compound metabolic process;GO:0043170//macromolecule metabolic process;GO:0044248//cellular catabolic process;GO:0044270//cellular nitrogen compound catabolic process;GO:0071704//organic substance metabolic process;GO:0044238//primary metabolic process…
Unigene0063570	-	RanBP2-type zinc finger protein At1g67325 [Anthurium amnicola]	-	-	-	-
Unigene0063579	-	hypothetical protein CISIN_1g0136582mg, partial [Citrus sinensis]	-	-	-	-
Unigene0063661	At3g22660	PREDICTED: probable rRNA-processing protein EBP2 homolog [Nelumbo nucifera]	-	GO:0044464//cell part;GO:0043226//organelle;GO:0043228//non-membrane-bounded organelle;GO:0043231//intracellular membrane-bounded organelle;GO:0044424//intracellular part;GO:0005623//cell;GO:0043232//intracellular non-membrane-bounded organelle;GO:0005622//intracellular;GO:0043227//membrane-bounded organelle;GO:0043229//intracellular organelle	-	GO:0071702//organic substance transport;GO:0051179//localization;GO:0045184//establishment of protein localization;GO:0006886//intracellular protein transport;GO:0044085//cellular component biogenesis;GO:0051234//establishment of localization;GO:0070727//cellular macromolecule localization;GO:0008104//protein localization;GO:1902578//single-organism localization;GO:0046907//intracellular transpor…
Unigene0063780	SBT1.7	PREDICTED: subtilisin-like protease SBT1.7 [Jatropha curcas]	-	-	GO:0016787//hydrolase activity;GO:0003824//catalytic activity;GO:0070011//peptidase activity, acting on L-amino acid peptides;GO:0008233//peptidase activity	GO:0071704//organic substance metabolic process;GO:0019538//protein metabolic process;GO:0043170//macromolecule metabolic process;GO:0008152//metabolic process;GO:0044238//primary metabolic process
Unigene0063795	UGT92A1	PREDICTED: UDP-glycosyltransferase 92A1-like [Vitis vinifera]	-	-	GO:0016740//transferase activity;GO:0003824//catalytic activity;GO:0016757//transferase activity, transferring glycosyl groups;GO:0016758//transferase activity, transferring hexosyl groups	-
Unigene0063843	FHY	PREDICTED: bifunctional riboflavin kinase/FMN phosphatase [Elaeis guineensis]	ko01100//Metabolic pathways//Global and Overview//Metabolism;ko01110//Biosynthesis of secondary metabolites//Global and Overview//Metabolism;ko00740//Riboflavin metabolism//Metabolism of cofactors and vitamins//Metabolism	-	GO:0016740//transferase activity;GO:0003824//catalytic activity;GO:0016301//kinase activity;GO:0016787//hydrolase activity;GO:0016772//transferase activity, transferring phosphorus-containing groups;GO:0016788//hydrolase activity, acting on ester bonds;GO:0042578//phosphoric ester hydrolase activity;GO:0016791//phosphatase activity	GO:0008152//metabolic process;GO:0006807//nitrogen compound metabolic process;GO:0044699//single-organism process;GO:0046483//heterocycle metabolic process;GO:0042726//flavin-containing compound metabolic process;GO:0006793//phosphorus metabolic process;GO:0044710//single-organism metabolic process;GO:0034641//cellular nitrogen compound metabolic process;GO:0006767//water-soluble vitamin metaboli…
Unigene0063854	HDH	PREDICTED: histidinol dehydrogenase, chloroplastic isoform X1 [Elaeis guineensis]	ko01100//Metabolic pathways//Global and Overview//Metabolism;ko01110//Biosynthesis of secondary metabolites//Global and Overview//Metabolism;ko01230//Biosynthesis of amino acids//Global and Overview//Metabolism;ko00340//Histidine metabolism//Amino acid metabolism//Metabolism	GO:0009536//plastid;GO:0043226//organelle;GO:0044435//plastid part;GO:0005622//intracellular;GO:0043229//intracellular organelle;GO:0009532//plastid stroma;GO:0044444//cytoplasmic part;GO:0043227//membrane-bounded organelle;GO:0005737//cytoplasm;GO:0044422//organelle part;GO:0044424//intracellular part;GO:0005623//cell;GO:0043231//intracellular membrane-bounded organelle;GO:0044464//cell part;GO:…	GO:1901363//heterocyclic compound binding;GO:0046872//metal ion binding;GO:0043169//cation binding;GO:0003824//catalytic activity;GO:0036094//small molecule binding;GO:0046914//transition metal ion binding;GO:0016616//oxidoreductase activity, acting on the CH-OH group of donors, NAD or NADP as acceptor;GO:0016491//oxidoreductase activity;GO:1901265//nucleoside phosphate binding;GO:0016614//oxidor…	GO:0009058//biosynthetic process;GO:0006520//cellular amino acid metabolic process;GO:0007275//multicellular organism development;GO:0044106//cellular amine metabolic process;GO:0044237//cellular metabolic process;GO:1901564//organonitrogen compound metabolic process;GO:0044249//cellular biosynthetic process;GO:0009987//cellular process;GO:0044710//single-organism metabolic process;GO:0006807//ni…
Unigene0063863	DUSP12	PREDICTED: dual specificity protein phosphatase 12 [Ricinus communis]	-	-	GO:0004721//phosphoprotein phosphatase activity;GO:0016791//phosphatase activity;GO:0042578//phosphoric ester hydrolase activity;GO:0016787//hydrolase activity;GO:0016788//hydrolase activity, acting on ester bonds;GO:0003824//catalytic activity	GO:0006796//phosphate-containing compound metabolic process;GO:0006464//cellular protein modification process;GO:0071704//organic substance metabolic process;GO:0043170//macromolecule metabolic process;GO:0044260//cellular macromolecule metabolic process;GO:0044267//cellular protein metabolic process;GO:0009987//cellular process;GO:0019538//protein metabolic process;GO:0006470//protein dephosphor…
Unigene0063877	-	--	-	-	-	-
Unigene0063947	ARK2	PREDICTED: armadillo repeat-containing kinesin-like protein 3 isoform X3 [Theobroma cacao]	-	GO:0044430//cytoskeletal part;GO:0043234//protein complex;GO:0005856//cytoskeleton;GO:0044424//intracellular part;GO:0044464//cell part;GO:0015630//microtubule cytoskeleton;GO:0043228//non-membrane-bounded organelle;GO:0043232//intracellular non-membrane-bounded organelle;GO:0044422//organelle part;GO:0005875//microtubule associated complex;GO:0032991//macromolecular complex;GO:0005622//intracell…	GO:0016818//hydrolase activity, acting on acid anhydrides, in phosphorus-containing anhydrides;GO:0016787//hydrolase activity;GO:0015631//tubulin binding;GO:0036094//small molecule binding;GO:0032550//purine ribonucleoside binding;GO:0097367//carbohydrate derivative binding;GO:0032549//ribonucleoside binding;GO:0005488//binding;GO:0008092//cytoskeletal protein binding;GO:0016462//pyrophosphatase …	GO:0009987//cellular process;GO:0044699//single-organism process;GO:0007017//microtubule-based process;GO:0044763//single-organism cellular process
Unigene0063979	zgc:66014	PREDICTED: lisH domain and HEAT repeat-containing protein KIAA1468 homolog [Vitis vinifera]	-	-	-	-
Unigene0064047	XRN4	PREDICTED: 5'-3' exoribonuclease 4-like isoform X1 [Phoenix dactylifera]	ko03018//RNA degradation//Folding, sorting and degradation//Genetic Information Processing;ko03008//Ribosome biogenesis in eukaryotes//Translation//Genetic Information Processing	-	-	-
Unigene0064120	-	maternal effect embryo arrest 60 [Arabidopsis thaliana]	-	-	-	GO:0000003//reproduction;GO:0006650//glycerophospholipid metabolic process;GO:0044255//cellular lipid metabolic process;GO:0046486//glycerolipid metabolic process;GO:0009058//biosynthetic process;GO:0044699//single-organism process;GO:0019637//organophosphate metabolic process;GO:0090407//organophosphate biosynthetic process;GO:0022414//reproductive process;GO:0044238//primary metabolic process;G…
Unigene0064166	HGSNAT	PREDICTED: heparan-alpha-glucosaminide N-acetyltransferase [Nelumbo nucifera]	ko01100//Metabolic pathways//Global and Overview//Metabolism;ko00531//Glycosaminoglycan degradation//Glycan biosynthesis and metabolism//Metabolism	-	-	-
Unigene0064179	purH	PREDICTED: bifunctional purine biosynthesis protein PurH [Cucumis melo]	ko01100//Metabolic pathways//Global and Overview//Metabolism;ko01110//Biosynthesis of secondary metabolites//Global and Overview//Metabolism;ko01130//Biosynthesis of antibiotics//Global and Overview//Metabolism;ko00230//Purine metabolism//Nucleotide metabolism//Metabolism;ko00670//One carbon pool by folate//Metabolism of cofactors and vitamins//Metabolism	-	GO:0016814//hydrolase activity, acting on carbon-nitrogen (but not peptide) bonds, in cyclic amidines;GO:0016787//hydrolase activity;GO:0016741//transferase activity, transferring one-carbon groups;GO:0016810//hydrolase activity, acting on carbon-nitrogen (but not peptide) bonds;GO:0019238//cyclohydrolase activity;GO:0016742//hydroxymethyl-, formyl- and related transferase activity;GO:0003824//ca…	GO:0044699//single-organism process;GO:0044237//cellular metabolic process;GO:0006163//purine nucleotide metabolic process;GO:0071704//organic substance metabolic process;GO:0006793//phosphorus metabolic process;GO:0019637//organophosphate metabolic process;GO:0055086//nucleobase-containing small molecule metabolic process;GO:0006725//cellular aromatic compound metabolic process;GO:0006753//nucle…
Unigene0064303	Wbscr22	S-adenosyl-L-methionine-dependent methyltransferases superfamily protein isoform 1 [Theobroma cacao]	-	GO:0043227//membrane-bounded organelle;GO:0044464//cell part;GO:0043232//intracellular non-membrane-bounded organelle;GO:0043229//intracellular organelle;GO:0005623//cell;GO:0005622//intracellular;GO:0043228//non-membrane-bounded organelle;GO:0043226//organelle;GO:0043231//intracellular membrane-bounded organelle;GO:0044424//intracellular part	GO:0003824//catalytic activity	GO:0016072//rRNA metabolic process;GO:0008152//metabolic process;GO:0016070//RNA metabolic process;GO:0006139//nucleobase-containing compound metabolic process;GO:0071704//organic substance metabolic process;GO:0034641//cellular nitrogen compound metabolic process;GO:0044237//cellular metabolic process;GO:0044260//cellular macromolecule metabolic process;GO:0090304//nucleic acid metabolic process…
Unigene0064305	Wbscr22	S-adenosyl-L-methionine-dependent methyltransferase superfamily protein [Zea mays]	-	-	-	-
Unigene0064320	CALS3	PREDICTED: callose synthase 3 [Nelumbo nucifera]	-	-	GO:0016740//transferase activity;GO:0016757//transferase activity, transferring glycosyl groups;GO:0046527//glucosyltransferase activity;GO:0016758//transferase activity, transferring hexosyl groups;GO:0008194//UDP-glycosyltransferase activity;GO:0035251//UDP-glucosyltransferase activity;GO:0003824//catalytic activity	GO:0071704//organic substance metabolic process;GO:0044262//cellular carbohydrate metabolic process;GO:0005976//polysaccharide metabolic process;GO:0044238//primary metabolic process;GO:0044237//cellular metabolic process;GO:0044264//cellular polysaccharide metabolic process;GO:0044042//glucan metabolic process;GO:0005975//carbohydrate metabolic process;GO:0006074//(1->3)-beta-D-glucan metabolic …
Unigene0064326	maoII	Primary amine oxidase [Anthurium amnicola]	ko01100//Metabolic pathways//Global and Overview//Metabolism;ko01110//Biosynthesis of secondary metabolites//Global and Overview//Metabolism;ko00410//beta-Alanine metabolism//Metabolism of other amino acids//Metabolism;ko00260//Glycine, serine and threonine metabolism//Amino acid metabolism//Metabolism;ko00350//Tyrosine metabolism//Amino acid metabolism//Metabolism;ko00360//Phenylalanine metaboli…	-	-	-
Unigene0064419	RPS24B	PREDICTED: 40S ribosomal protein S24-1 [Ipomoea nil]	ko03010//Ribosome//Translation//Genetic Information Processing	GO:0005623//cell;GO:0044424//intracellular part;GO:1990904//ribonucleoprotein complex;GO:0030529//intracellular ribonucleoprotein complex;GO:0005622//intracellular;GO:0044464//cell part;GO:0032991//macromolecular complex	GO:0005198//structural molecule activity	GO:0008152//metabolic process;GO:0043170//macromolecule metabolic process;GO:0010467//gene expression;GO:0071704//organic substance metabolic process
Unigene0064434	-	--	-	-	-	-
Unigene0064487	-	DNA ligase 4 [Anthurium amnicola]	-	-	-	-
Unigene0064573	EXL3	PREDICTED: GDSL esterase/lipase EXL3 [Phoenix dactylifera]	-	-	-	-
Unigene0064582	AMY3	Alpha-amylase isozyme 2A, partial [Anthurium amnicola]	ko01100//Metabolic pathways//Global and Overview//Metabolism;ko00500//Starch and sucrose metabolism//Carbohydrate metabolism//Metabolism	-	GO:0043167//ion binding;GO:0016798//hydrolase activity, acting on glycosyl bonds;GO:0043169//cation binding;GO:0016160//amylase activity;GO:0016787//hydrolase activity;GO:0003824//catalytic activity;GO:0004553//hydrolase activity, hydrolyzing O-glycosyl compounds;GO:0046872//metal ion binding;GO:0005488//binding	GO:0044238//primary metabolic process;GO:0008152//metabolic process
Unigene0064584	USP39	PREDICTED: U4/U6.U5 tri-snRNP-associated protein 2 [Theobroma cacao]	ko03040//Spliceosome//Transcription//Genetic Information Processing	-	GO:0043167//ion binding;GO:0003824//catalytic activity;GO:0005488//binding;GO:0016787//hydrolase activity;GO:0046872//metal ion binding;GO:0043169//cation binding;GO:0046914//transition metal ion binding	GO:0044237//cellular metabolic process;GO:0006508//proteolysis;GO:0044248//cellular catabolic process;GO:0044267//cellular protein metabolic process;GO:0009987//cellular process;GO:0008152//metabolic process;GO:0030163//protein catabolic process;GO:0044238//primary metabolic process;GO:0044260//cellular macromolecule metabolic process;GO:0019538//protein metabolic process;GO:0071704//organic subs…
Unigene0064613	Cdc40	PREDICTED: pre-mRNA-processing factor 17 isoform X1 [Nelumbo nucifera]	ko03040//Spliceosome//Transcription//Genetic Information Processing	-	-	-
Unigene0064770	PDCD4	PREDICTED: programmed cell death protein 4-like [Malus domestica]	-	-	GO:0003824//catalytic activity	GO:0044237//cellular metabolic process;GO:0008152//metabolic process;GO:0071704//organic substance metabolic process;GO:0044260//cellular macromolecule metabolic process;GO:0043170//macromolecule metabolic process;GO:0009987//cellular process
Unigene0064789	PARB	glutathione S-transferase [Vitis vinifera]	ko00480//Glutathione metabolism//Metabolism of other amino acids//Metabolism	-	-	-
Unigene0064832	ORP1C	PREDICTED: oxysterol-binding protein-related protein 1C [Amborella trichopoda]	-	-	-	-
Unigene0064955	Tnpo3	PREDICTED: transportin MOS14 isoform X4 [Nelumbo nucifera]	-	GO:0044464//cell part;GO:0043226//organelle;GO:0043227//membrane-bounded organelle;GO:0043229//intracellular organelle;GO:0005622//intracellular;GO:0044424//intracellular part;GO:0005623//cell;GO:0043231//intracellular membrane-bounded organelle	GO:0031267//small GTPase binding;GO:0017016//Ras GTPase binding;GO:0051020//GTPase binding;GO:0005515//protein binding;GO:0005488//binding;GO:0019899//enzyme binding	GO:0006810//transport;GO:0071702//organic substance transport;GO:0051179//localization;GO:0015031//protein transport;GO:0008104//protein localization;GO:0051234//establishment of localization;GO:0033036//macromolecule localization;GO:0045184//establishment of protein localization
Unigene0064998	Os05g0125500	PREDICTED: isovaleryl-CoA dehydrogenase, mitochondrial [Oryza sativa Japonica Group]	ko01100//Metabolic pathways//Global and Overview//Metabolism;ko00280//Valine, leucine and isoleucine degradation//Amino acid metabolism//Metabolism	-	GO:0036094//small molecule binding;GO:0003824//catalytic activity;GO:0016491//oxidoreductase activity;GO:1901265//nucleoside phosphate binding;GO:0097159//organic cyclic compound binding;GO:1901363//heterocyclic compound binding;GO:0000166//nucleotide binding;GO:0005488//binding	GO:0044710//single-organism metabolic process;GO:0044699//single-organism process;GO:0008152//metabolic process
Unigene0065034	-	Sn1-specific diacylglycerol lipase beta, partial [Anthurium amnicola]	-	-	-	GO:0008152//metabolic process;GO:0044699//single-organism process;GO:0006629//lipid metabolic process;GO:0044238//primary metabolic process;GO:0044710//single-organism metabolic process;GO:0071704//organic substance metabolic process
Unigene0065040	CNX1	PREDICTED: calnexin homolog [Elaeis guineensis]	ko04141//Protein processing in endoplasmic reticulum//Folding, sorting and degradation//Genetic Information Processing;ko04145//Phagosome//Transport and catabolism//Cellular Processes	GO:0043226//organelle;GO:0005623//cell;GO:0005622//intracellular;GO:0043231//intracellular membrane-bounded organelle;GO:0044424//intracellular part;GO:0044464//cell part;GO:0043229//intracellular organelle;GO:0043227//membrane-bounded organelle	GO:0005515//protein binding;GO:0005488//binding	GO:0071704//organic substance metabolic process;GO:0009987//cellular process;GO:0044237//cellular metabolic process;GO:0044267//cellular protein metabolic process;GO:0043170//macromolecule metabolic process;GO:0019538//protein metabolic process;GO:0008152//metabolic process;GO:0044260//cellular macromolecule metabolic process;GO:0044238//primary metabolic process
Unigene0065088	EFL4	PREDICTED: protein ELF4-LIKE 4-like [Nelumbo nucifera]	-	-	-	-
Unigene0065103	TMN1	PREDICTED: transmembrane 9 superfamily member 1 [Daucus carota subsp. sativus] [Daucus carota]	-	-	-	-
Unigene0065105	TMN1	PREDICTED: transmembrane 9 superfamily member 1-like isoform X1 [Gossypium raimondii]	-	-	-	-
Unigene0065106	-	--	-	-	-	-
Unigene0065148	-	--	-	-	-	-
Unigene0065200	-	DUF1677 domain-containing protein [Cephalotus follicularis]	-	-	-	-
Unigene0065271	At5g67140	PREDICTED: F-box protein At5g67140 [Nelumbo nucifera]	-	-	GO:0003824//catalytic activity	-
Unigene0065294	SKI3	PREDICTED: tetratricopeptide repeat protein SKI3 [Nelumbo nucifera]	ko03018//RNA degradation//Folding, sorting and degradation//Genetic Information Processing	-	-	-
Unigene0065296	RPS7	PREDICTED: 40S ribosomal protein S7 [Nelumbo nucifera]	ko03010//Ribosome//Translation//Genetic Information Processing	GO:0044424//intracellular part;GO:0005623//cell;GO:0044464//cell part;GO:0005622//intracellular;GO:1990904//ribonucleoprotein complex;GO:0032991//macromolecular complex;GO:0030529//intracellular ribonucleoprotein complex	-	GO:0071704//organic substance metabolic process;GO:0010467//gene expression;GO:0008152//metabolic process;GO:0043170//macromolecule metabolic process
Unigene0065363	-	--	-	-	-	-
Unigene0065411	-	DNA-directed RNA polymerase subunit beta', partial [Anthurium amnicola]	-	-	-	-
Unigene0065472	-	PREDICTED: peptidyl-prolyl cis-trans isomerase G [Cucumis sativus]	-	-	-	GO:0044702//single organism reproductive process;GO:0032502//developmental process;GO:0045491//xylan metabolic process;GO:0048856//anatomical structure development;GO:0048285//organelle fission;GO:0006807//nitrogen compound metabolic process;GO:0044710//single-organism metabolic process;GO:0060249//anatomical structure homeostasis;GO:1901360//organic cyclic compound metabolic process;GO:0000723//…
Unigene0065520	BAM9	PREDICTED: inactive beta-amylase 9-like [Nelumbo nucifera]	-	-	GO:0003824//catalytic activity;GO:0016787//hydrolase activity	-
Unigene0065559	-	--	-	-	-	-
Unigene0065577	At1g69990	PREDICTED: inactive LRR receptor-like serine/threonine-protein kinase BIR2 [Vitis vinifera]	-	-	-	-
Unigene0065579	ncor1	PREDICTED: uncharacterized protein LOC104594807 isoform X3 [Nelumbo nucifera]	-	-	-	-
Unigene0065648	TAF12	PREDICTED: transcription initiation factor TFIID subunit 12 isoform X1 [Nelumbo nucifera]	ko03022//Basal transcription factors//Transcription//Genetic Information Processing	-	-	GO:0006139//nucleobase-containing compound metabolic process;GO:0010467//gene expression;GO:0034641//cellular nitrogen compound metabolic process;GO:0006807//nitrogen compound metabolic process;GO:0009987//cellular process;GO:0090304//nucleic acid metabolic process;GO:0044237//cellular metabolic process;GO:0044238//primary metabolic process;GO:0044249//cellular biosynthetic process;GO:0009058//bi…
Unigene0065650	GIP	OSJNBa0060N03.9 [Oryza sativa Japonica Group]	-	-	-	-
Unigene0065654	-	PREDICTED: uncharacterized protein LOC103701385 isoform X1 [Phoenix dactylifera]	-	-	-	-
Unigene0065662	ATG8C	PREDICTED: autophagy-related protein 8C isoform X2 [Phoenix dactylifera]	ko04140//Regulation of autophagy//Transport and catabolism//Cellular Processes	-	-	-
Unigene0065748	B120	PREDICTED: G-type lectin S-receptor-like serine/threonine-protein kinase B120 [Nelumbo nucifera]	-	-	GO:0003824//catalytic activity;GO:0016772//transferase activity, transferring phosphorus-containing groups;GO:0016740//transferase activity;GO:0016301//kinase activity	GO:0009987//cellular process
Unigene0065752	-	--	-	-	-	-
Unigene0065785	-	--	-	-	-	-
Unigene0065795	RABB1C	PREDICTED: ras-related protein RABB1c-like [Phoenix dactylifera]	-	-	-	-
Unigene0065838	At4g31480	PREDICTED: coatomer subunit beta-1 [Theobroma cacao]	-	GO:0005622//intracellular;GO:0000139//Golgi membrane;GO:0016023//cytoplasmic, membrane-bounded vesicle;GO:0031410//cytoplasmic vesicle;GO:0098805//whole membrane;GO:0048475//coated membrane;GO:0044464//cell part;GO:0030659//cytoplasmic vesicle membrane;GO:0030662//coated vesicle membrane;GO:0030120//vesicle coat;GO:0030135//coated vesicle;GO:0043234//protein complex;GO:0005737//cytoplasm;GO:00985…	-	GO:0033036//macromolecule localization;GO:0008104//protein localization;GO:0051179//localization;GO:0051234//establishment of localization;GO:0006810//transport;GO:0015031//protein transport;GO:0071702//organic substance transport;GO:0045184//establishment of protein localization
Unigene0065841	GBA2	non-lysosomal glucosylceramidase [Ananas comosus]	ko01100//Metabolic pathways//Global and Overview//Metabolism;ko00600//Sphingolipid metabolism//Lipid metabolism//Metabolism;ko00511//Other glycan degradation//Glycan biosynthesis and metabolism//Metabolism	GO:0044425//membrane part;GO:0031224//intrinsic component of membrane;GO:0016020//membrane	GO:0004553//hydrolase activity, hydrolyzing O-glycosyl compounds;GO:0016798//hydrolase activity, acting on glycosyl bonds;GO:0016787//hydrolase activity;GO:0003824//catalytic activity	GO:0044763//single-organism cellular process;GO:0044699//single-organism process;GO:0008152//metabolic process;GO:0044255//cellular lipid metabolic process;GO:0071704//organic substance metabolic process;GO:0044237//cellular metabolic process;GO:0044238//primary metabolic process;GO:0009987//cellular process;GO:0044710//single-organism metabolic process;GO:0006629//lipid metabolic process;GO:0006…
Unigene0065902	tmem56-b	PREDICTED: transmembrane protein 56 [Vitis vinifera]	-	GO:0016020//membrane;GO:0031224//intrinsic component of membrane;GO:0044425//membrane part	-	-
Unigene0065962	CYP63	PREDICTED: peptidyl-prolyl cis-trans isomerase CYP95 isoform X2 [Nelumbo nucifera]	-	-	-	GO:0071704//organic substance metabolic process;GO:0044238//primary metabolic process;GO:0008152//metabolic process;GO:0043170//macromolecule metabolic process;GO:0044260//cellular macromolecule metabolic process;GO:0009987//cellular process;GO:0044237//cellular metabolic process
Unigene0065993	-	histone-lysine N-methyltransferase [Arabidopsis thaliana]	-	GO:0005737//cytoplasm;GO:0044424//intracellular part;GO:0044444//cytoplasmic part;GO:0005622//intracellular;GO:0044464//cell part;GO:0005623//cell	-	-
Unigene0066055	EMB175	PREDICTED: pentatricopeptide repeat-containing protein At5g03800 [Elaeis guineensis]	-	-	-	-
Unigene0066086	At3g50210	PREDICTED: probable 2-oxoglutarate-dependent dioxygenase At3g49630 [Ziziphus jujuba]	-	-	GO:0016491//oxidoreductase activity;GO:0046872//metal ion binding;GO:0005488//binding;GO:0046914//transition metal ion binding;GO:0043167//ion binding;GO:0043169//cation binding;GO:0016705//oxidoreductase activity, acting on paired donors, with incorporation or reduction of molecular oxygen;GO:0003824//catalytic activity	GO:0008152//metabolic process;GO:0044699//single-organism process;GO:0044710//single-organism metabolic process
Unigene0066140	Cag_1601	PREDICTED: UPF0301 protein Cpha266_0885 [Citrus sinensis]	-	-	-	-
Unigene0066152	EMB1674	PREDICTED: protein EMBRYO DEFECTIVE 1674-like isoform X1 [Prunus mume]	-	-	-	-
Unigene0066261	-	PREDICTED: early endosome antigen 1 [Nelumbo nucifera]	-	-	-	-
Unigene0066406	-	E3 ubiquitin-protein ligase bre1-like isoform X2 [Asparagus officinalis]	-	-	-	-
Unigene0066407	-	E3 ubiquitin-protein ligase bre1-like isoform X2 [Asparagus officinalis]	-	-	-	-
Unigene0066411	SHM4	PREDICTED: serine hydroxymethyltransferase 4 [Nelumbo nucifera]	ko01100//Metabolic pathways//Global and Overview//Metabolism;ko01110//Biosynthesis of secondary metabolites//Global and Overview//Metabolism;ko01130//Biosynthesis of antibiotics//Global and Overview//Metabolism;ko01120//Microbial metabolism in diverse environments//Global and Overview//Metabolism;ko01200//Carbon metabolism//Global and Overview//Metabolism;ko01230//Biosynthesis of amino acids//Glo…	-	GO:0016742//hydroxymethyl-, formyl- and related transferase activity;GO:0043168//anion binding;GO:0005488//binding;GO:0016741//transferase activity, transferring one-carbon groups;GO:0016740//transferase activity;GO:0043167//ion binding;GO:0003824//catalytic activity	GO:0006082//organic acid metabolic process;GO:0044281//small molecule metabolic process;GO:1901605//alpha-amino acid metabolic process;GO:0006730//one-carbon metabolic process;GO:0044710//single-organism metabolic process;GO:0043436//oxoacid metabolic process;GO:0019752//carboxylic acid metabolic process;GO:0044238//primary metabolic process;GO:0044699//single-organism process;GO:0071704//organic…
Unigene0066442	RFS	PREDICTED: galactinol--sucrose galactosyltransferase [Vitis vinifera]	ko00052//Galactose metabolism//Carbohydrate metabolism//Metabolism	-	GO:0008378//galactosyltransferase activity;GO:0003824//catalytic activity;GO:0016758//transferase activity, transferring hexosyl groups;GO:0016740//transferase activity;GO:0016757//transferase activity, transferring glycosyl groups	-
Unigene0066444	UPTG2	UDP-arabinopyranose mutase 1 [Elaeis guineensis]	ko00520//Amino sugar and nucleotide sugar metabolism//Carbohydrate metabolism//Metabolism	-	-	-
Unigene0066461	ORP1C	PREDICTED: oxysterol-binding protein-related protein 1C [Amborella trichopoda]	-	-	-	-
Unigene0066569	hddc2	HD domain-containing protein 2, partial [Anthurium amnicola]	-	-	-	-
Unigene0066588	RIT1	initiator tRNA phosphoribosyl transferase family protein [California macrophylla]	-	-	GO:0003824//catalytic activity;GO:0016740//transferase activity;GO:0016757//transferase activity, transferring glycosyl groups	-
Unigene0066686	At4g26390	PREDICTED: pyruvate kinase 2, cytosolic-like [Nelumbo nucifera]	ko01100//Metabolic pathways//Global and Overview//Metabolism;ko01110//Biosynthesis of secondary metabolites//Global and Overview//Metabolism;ko01130//Biosynthesis of antibiotics//Global and Overview//Metabolism;ko01120//Microbial metabolism in diverse environments//Global and Overview//Metabolism;ko01200//Carbon metabolism//Global and Overview//Metabolism;ko01230//Biosynthesis of amino acids//Glo…	-	GO:0016740//transferase activity;GO:0031420//alkali metal ion binding;GO:0005488//binding;GO:0043169//cation binding;GO:0043167//ion binding;GO:0016301//kinase activity;GO:0003824//catalytic activity;GO:0016772//transferase activity, transferring phosphorus-containing groups;GO:0046872//metal ion binding	GO:0044763//single-organism cellular process;GO:0032787//monocarboxylic acid metabolic process;GO:0008152//metabolic process;GO:0006082//organic acid metabolic process;GO:0044699//single-organism process;GO:0044281//small molecule metabolic process;GO:0044710//single-organism metabolic process;GO:0006796//phosphate-containing compound metabolic process;GO:0043436//oxoacid metabolic process;GO:000…
Unigene0066843	RPS1	PREDICTED: 30S ribosomal protein S1, chloroplastic [Nelumbo nucifera]	ko03010//Ribosome//Translation//Genetic Information Processing	GO:0043227//membrane-bounded organelle;GO:0043231//intracellular membrane-bounded organelle;GO:0043226//organelle;GO:0032991//macromolecular complex;GO:0044422//organelle part;GO:0044446//intracellular organelle part;GO:0005737//cytoplasm;GO:0044424//intracellular part;GO:0005622//intracellular;GO:0009532//plastid stroma;GO:0044444//cytoplasmic part;GO:0005623//cell;GO:0044435//plastid part;GO:00…	GO:0097159//organic cyclic compound binding;GO:0005198//structural molecule activity;GO:0003676//nucleic acid binding;GO:0005488//binding;GO:1901363//heterocyclic compound binding	GO:0006778//porphyrin-containing compound metabolic process;GO:0033013//tetrapyrrole metabolic process;GO:0019684//photosynthesis, light reaction;GO:0019438//aromatic compound biosynthetic process;GO:0071704//organic substance metabolic process;GO:0044271//cellular nitrogen compound biosynthetic process;GO:0051186//cofactor metabolic process;GO:0016043//cellular component organization;GO:0019752/…
Unigene0066855	RPS1	PREDICTED: 30S ribosomal protein S1, chloroplastic [Nelumbo nucifera]	ko03010//Ribosome//Translation//Genetic Information Processing	GO:0044464//cell part;GO:0044424//intracellular part;GO:1990904//ribonucleoprotein complex;GO:0005623//cell;GO:0030529//intracellular ribonucleoprotein complex;GO:0005622//intracellular;GO:0032991//macromolecular complex	-	-
Unigene0066864	KINESIN-13A	PREDICTED: kinesin-like protein KIN-13A [Nelumbo nucifera]	-	GO:0043227//membrane-bounded organelle;GO:0044446//intracellular organelle part;GO:0043231//intracellular membrane-bounded organelle;GO:0005622//intracellular;GO:0044422//organelle part;GO:0005794//Golgi apparatus;GO:0043229//intracellular organelle;GO:0015630//microtubule cytoskeleton;GO:0005737//cytoplasm;GO:0044464//cell part;GO:0012505//endomembrane system;GO:0043226//organelle;GO:0043232//in…	GO:0032550//purine ribonucleoside binding;GO:0005488//binding;GO:0001882//nucleoside binding;GO:0005515//protein binding;GO:0016787//hydrolase activity;GO:0016818//hydrolase activity, acting on acid anhydrides, in phosphorus-containing anhydrides;GO:0015631//tubulin binding;GO:0016817//hydrolase activity, acting on acid anhydrides;GO:0008092//cytoskeletal protein binding;GO:0001883//purine nucleo…	GO:0044699//single-organism process;GO:0044767//single-organism developmental process;GO:0043933//macromolecular complex subunit organization;GO:0007010//cytoskeleton organization;GO:0000003//reproduction;GO:0009888//tissue development;GO:0045229//external encapsulating structure organization;GO:0071822//protein complex subunit organization;GO:0044237//cellular metabolic process;GO:0007275//multi…
Unigene0066892	CLASP	PREDICTED: CLIP-associated protein-like [Nelumbo nucifera]	-	-	-	-
Unigene0066947	PCFS4	PREDICTED: polyadenylation and cleavage factor homolog 4-like isoform X1 [Nelumbo nucifera]	ko03015//mRNA surveillance pathway//Translation//Genetic Information Processing	-	-	-
Unigene0066969	-	zf-CW domain-containing protein [Cephalotus follicularis]	-	-	-	-
Unigene0066970	-	PREDICTED: uncharacterized protein LOC102611579 [Citrus sinensis]	-	-	-	-
Unigene0066995	ITPK2	Inositol-tetrakisphosphate 1-kinase 2 [Anthurium amnicola]	ko01100//Metabolic pathways//Global and Overview//Metabolism;ko00562//Inositol phosphate metabolism//Carbohydrate metabolism//Metabolism;ko04070//Phosphatidylinositol signaling system//Signal transduction//Environmental Information Processing	GO:0005622//intracellular;GO:0043226//organelle;GO:0043229//intracellular organelle;GO:0044464//cell part;GO:0005623//cell;GO:0043227//membrane-bounded organelle;GO:0044424//intracellular part;GO:0043231//intracellular membrane-bounded organelle	GO:0001883//purine nucleoside binding;GO:0097367//carbohydrate derivative binding;GO:0003824//catalytic activity;GO:0016772//transferase activity, transferring phosphorus-containing groups;GO:0097159//organic cyclic compound binding;GO:0016301//kinase activity;GO:0032550//purine ribonucleoside binding;GO:1901363//heterocyclic compound binding;GO:0051765//inositol tetrakisphosphate kinase activity…	GO:0044710//single-organism metabolic process;GO:0071704//organic substance metabolic process;GO:0032787//monocarboxylic acid metabolic process;GO:0043207//response to external biotic stimulus;GO:0043647//inositol phosphate metabolic process;GO:0001101//response to acid chemical;GO:0009607//response to biotic stimulus;GO:0019637//organophosphate metabolic process;GO:0009987//cellular process;GO:0…
Unigene0067062	FH3	PREDICTED: formin-like protein 14 isoform X1 [Nelumbo nucifera]	-	GO:0005737//cytoplasm;GO:0015630//microtubule cytoskeleton;GO:0043226//organelle;GO:0044424//intracellular part;GO:0015629//actin cytoskeleton;GO:0043232//intracellular non-membrane-bounded organelle;GO:0044444//cytoplasmic part;GO:0005856//cytoskeleton;GO:0043228//non-membrane-bounded organelle;GO:0005623//cell;GO:0043229//intracellular organelle;GO:0044464//cell part;GO:0005622//intracellular	GO:0016787//hydrolase activity;GO:0008092//cytoskeletal protein binding;GO:0003779//actin binding;GO:0016791//phosphatase activity;GO:0003824//catalytic activity;GO:0005515//protein binding;GO:0016788//hydrolase activity, acting on ester bonds;GO:0042578//phosphoric ester hydrolase activity;GO:0005488//binding;GO:0015631//tubulin binding	GO:0044699//single-organism process;GO:0009555//pollen development;GO:0006793//phosphorus metabolic process;GO:0048229//gametophyte development;GO:0009987//cellular process;GO:0007010//cytoskeleton organization;GO:0071822//protein complex subunit organization;GO:0016043//cellular component organization;GO:0032501//multicellular organismal process;GO:0071840//cellular component organization or bio…
Unigene0067063	GNTI	Alpha-1,3-mannosyl-glycoprotein 2-beta-N-acetylglucosaminyltransferase [Anthurium amnicola]	ko01100//Metabolic pathways//Global and Overview//Metabolism;ko00510//N-Glycan biosynthesis//Glycan biosynthesis and metabolism//Metabolism	GO:0016020//membrane;GO:0043231//intracellular membrane-bounded organelle;GO:0044422//organelle part;GO:0044464//cell part;GO:0005622//intracellular;GO:0031090//organelle membrane;GO:0043227//membrane-bounded organelle;GO:0044425//membrane part;GO:0031984//organelle subcompartment;GO:0043226//organelle;GO:0044446//intracellular organelle part;GO:0031224//intrinsic component of membrane;GO:0005623…	GO:0016757//transferase activity, transferring glycosyl groups;GO:0008194//UDP-glycosyltransferase activity;GO:0016758//transferase activity, transferring hexosyl groups;GO:0008375//acetylglucosaminyltransferase activity;GO:0005488//binding;GO:0016740//transferase activity;GO:0003824//catalytic activity;GO:0043167//ion binding;GO:0043169//cation binding	GO:0006970//response to osmotic stress;GO:0006464//cellular protein modification process;GO:0008652//cellular amino acid biosynthetic process;GO:0044763//single-organism cellular process;GO:0071704//organic substance metabolic process;GO:0070085//glycosylation;GO:0006790//sulfur compound metabolic process;GO:0000096//sulfur amino acid metabolic process;GO:0043436//oxoacid metabolic process;GO:004…
Unigene0067105	EIF5	Eukaryotic translation initiation factor 5 [Anthurium amnicola]	ko03013//RNA transport//Translation//Genetic Information Processing	-	-	-
Unigene0067126	DCL4	PREDICTED: endoribonuclease Dicer homolog 4 isoform X2 [Elaeis guineensis]	-	-	GO:1901363//heterocyclic compound binding;GO:0097159//organic cyclic compound binding;GO:0005488//binding;GO:0016788//hydrolase activity, acting on ester bonds;GO:0016787//hydrolase activity;GO:0003824//catalytic activity;GO:0004519//endonuclease activity;GO:0004518//nuclease activity	GO:0008152//metabolic process;GO:0090305//nucleic acid phosphodiester bond hydrolysis;GO:0019219//regulation of nucleobase-containing compound metabolic process;GO:0048856//anatomical structure development;GO:0035194//posttranscriptional gene silencing by RNA;GO:0050789//regulation of biological process;GO:0071704//organic substance metabolic process;GO:0016246//RNA interference;GO:0010556//regul…
Unigene0067127	DCL4	PREDICTED: endoribonuclease Dicer homolog 4 isoform X2 [Elaeis guineensis]	-	-	GO:0004518//nuclease activity;GO:0016787//hydrolase activity;GO:0016788//hydrolase activity, acting on ester bonds;GO:0004519//endonuclease activity;GO:0005488//binding;GO:1901363//heterocyclic compound binding;GO:0097159//organic cyclic compound binding;GO:0003824//catalytic activity	GO:0006355//regulation of transcription, DNA-templated;GO:0070887//cellular response to chemical stimulus;GO:0050794//regulation of cellular process;GO:0010629//negative regulation of gene expression;GO:0044707//single-multicellular organism process;GO:0040029//regulation of gene expression, epigenetic;GO:0031326//regulation of cellular biosynthetic process;GO:0044237//cellular metabolic process;…
Unigene0067234	At2g43090	Aconitase_C domain-containing protein [Cephalotus follicularis]	ko01100//Metabolic pathways//Global and Overview//Metabolism;ko01110//Biosynthesis of secondary metabolites//Global and Overview//Metabolism;ko01230//Biosynthesis of amino acids//Global and Overview//Metabolism;ko01210//2-Oxocarboxylic acid metabolism//Global and Overview//Metabolism;ko00290//Valine, leucine and isoleucine biosynthesis//Amino acid metabolism//Metabolism;ko00660//C5-Branched dibas…	GO:0044444//cytoplasmic part;GO:0005622//intracellular;GO:0005829//cytosol;GO:0044424//intracellular part;GO:0044445//cytosolic part;GO:0005737//cytoplasm;GO:0005623//cell;GO:0044464//cell part	-	GO:0006551//leucine metabolic process;GO:0006520//cellular amino acid metabolic process;GO:1901564//organonitrogen compound metabolic process;GO:0044281//small molecule metabolic process;GO:0006807//nitrogen compound metabolic process;GO:0043436//oxoacid metabolic process;GO:0009081//branched-chain amino acid metabolic process;GO:0071704//organic substance metabolic process;GO:0044699//single-org…
Unigene0067248	AtMg00300	Retrovirus-related Pol polyprotein from transposon TNT 1-94 [Cajanus cajan]	-	-	-	-
Unigene0067249	-	Integrase, catalytic core [Corchorus capsularis]	-	-	-	-
Unigene0067293	-	PREDICTED: splicing factor 3A subunit 2 [Vitis vinifera]	-	-	-	-
Unigene0067295	At5g16730	PREDICTED: WEB family protein At3g02930, chloroplastic-like [Nelumbo nucifera]	-	-	-	-
Unigene0067297	HSP70-14	PREDICTED: heat shock 70 kDa protein 15-like [Nelumbo nucifera]	-	-	GO:0036094//small molecule binding;GO:0001882//nucleoside binding;GO:0032550//purine ribonucleoside binding;GO:0032549//ribonucleoside binding;GO:1901363//heterocyclic compound binding;GO:0097159//organic cyclic compound binding;GO:0005488//binding;GO:0001883//purine nucleoside binding;GO:0097367//carbohydrate derivative binding	-
Unigene0067298	At5g16730	PREDICTED: WEB family protein At3g02930, chloroplastic-like [Nelumbo nucifera]	-	-	-	-
Unigene0067370	B3GALT7	PREDICTED: beta-1,3-galactosyltransferase 7 [Nelumbo nucifera]	-	GO:0044425//membrane part;GO:0031224//intrinsic component of membrane;GO:0016020//membrane	GO:0016740//transferase activity;GO:0016758//transferase activity, transferring hexosyl groups;GO:0003824//catalytic activity;GO:0016757//transferase activity, transferring glycosyl groups	GO:0071704//organic substance metabolic process;GO:0044260//cellular macromolecule metabolic process;GO:0009987//cellular process;GO:0044267//cellular protein metabolic process;GO:0043170//macromolecule metabolic process;GO:0019538//protein metabolic process;GO:0036211//protein modification process;GO:0044238//primary metabolic process;GO:0008152//metabolic process;GO:0043412//macromolecule modif…
Unigene0067372	B3GALT7	PREDICTED: beta-1,3-galactosyltransferase 7 [Nelumbo nucifera]	-	GO:0016020//membrane;GO:0044425//membrane part;GO:0031224//intrinsic component of membrane	GO:0016740//transferase activity;GO:0003824//catalytic activity;GO:0016758//transferase activity, transferring hexosyl groups;GO:0016757//transferase activity, transferring glycosyl groups	GO:0044260//cellular macromolecule metabolic process;GO:0071704//organic substance metabolic process;GO:0019538//protein metabolic process;GO:0044237//cellular metabolic process;GO:0044238//primary metabolic process;GO:0008152//metabolic process;GO:0006464//cellular protein modification process;GO:0043170//macromolecule metabolic process;GO:0009987//cellular process;GO:0036211//protein modificati…
Unigene0067373	B3GALT7	PREDICTED: beta-1,3-galactosyltransferase 7 [Nelumbo nucifera]	-	GO:0031224//intrinsic component of membrane;GO:0016020//membrane;GO:0044425//membrane part	GO:0016758//transferase activity, transferring hexosyl groups;GO:0016740//transferase activity;GO:0003824//catalytic activity;GO:0016757//transferase activity, transferring glycosyl groups	GO:0006464//cellular protein modification process;GO:0009987//cellular process;GO:0008152//metabolic process;GO:0019538//protein metabolic process;GO:0044238//primary metabolic process;GO:0044237//cellular metabolic process;GO:0043412//macromolecule modification;GO:0044260//cellular macromolecule metabolic process;GO:0036211//protein modification process;GO:0044267//cellular protein metabolic pro…
Unigene0067399	VAMP725	PREDICTED: vesicle-associated membrane protein 721 isoform X1 [Populus euphratica]	-	GO:0016020//membrane;GO:0031224//intrinsic component of membrane;GO:0044425//membrane part	-	GO:0051179//localization;GO:0051234//establishment of localization;GO:0006810//transport
Unigene0067404	-	--	-	-	-	-
Unigene0067433	-	--	-	-	-	-
Unigene0067481	TAF2	PREDICTED: transcription initiation factor TFIID subunit 2 isoform X1 [Nelumbo nucifera]	ko03022//Basal transcription factors//Transcription//Genetic Information Processing	-	-	-
Unigene0067482	TAF2	PREDICTED: transcription initiation factor TFIID subunit 2 isoform X1 [Nelumbo nucifera]	ko03022//Basal transcription factors//Transcription//Genetic Information Processing	-	-	-
Unigene0067483	TAF2	PREDICTED: transcription initiation factor TFIID subunit 2 isoform X1 [Nelumbo nucifera]	ko03022//Basal transcription factors//Transcription//Genetic Information Processing	-	-	-
Unigene0067512	TOM2A	PREDICTED: tobamovirus multiplication protein 2A-like [Nelumbo nucifera]	-	-	-	-
Unigene0067518	mog-4	PREDICTED: pre-mRNA-splicing factor ATP-dependent RNA helicase DEAH1 [Vitis vinifera]	ko03040//Spliceosome//Transcription//Genetic Information Processing	-	-	-
Unigene0067543	SCAR2	PREDICTED: protein SCAR2-like [Nelumbo nucifera]	-	-	-	-
Unigene0067549	At4g26220	PREDICTED: probable caffeoyl-CoA O-methyltransferase At4g26220 [Nicotiana attenuata]	ko01100//Metabolic pathways//Global and Overview//Metabolism;ko01110//Biosynthesis of secondary metabolites//Global and Overview//Metabolism;ko00940//Phenylpropanoid biosynthesis//Biosynthesis of other secondary metabolites//Metabolism;ko00360//Phenylalanine metabolism//Amino acid metabolism//Metabolism;ko00941//Flavonoid biosynthesis//Biosynthesis of other secondary metabolites//Metabolism;ko009…	-	GO:0016741//transferase activity, transferring one-carbon groups;GO:0008171//O-methyltransferase activity;GO:0008168//methyltransferase activity;GO:0003824//catalytic activity;GO:0016740//transferase activity	GO:0008152//metabolic process
Unigene0067611	TIC62	PREDICTED: protein plastid transcriptionally active 16, chloroplastic [Nelumbo nucifera]	-	GO:0043232//intracellular non-membrane-bounded organelle;GO:0031984//organelle subcompartment;GO:0043226//organelle;GO:0043228//non-membrane-bounded organelle;GO:0009579//thylakoid;GO:0044444//cytoplasmic part;GO:0031967//organelle envelope;GO:0043229//intracellular organelle;GO:0044435//plastid part;GO:0009507//chloroplast;GO:0044434//chloroplast part;GO:0005737//cytoplasm;GO:0031975//envelope;G…	-	GO:0044237//cellular metabolic process;GO:1901564//organonitrogen compound metabolic process;GO:0006721//terpenoid metabolic process;GO:0016072//rRNA metabolic process;GO:0009628//response to abiotic stimulus;GO:1901135//carbohydrate derivative metabolic process;GO:0006778//porphyrin-containing compound metabolic process;GO:1901659//glycosyl compound biosynthetic process;GO:0006720//isoprenoid me…
Unigene0067618	CLSY1	PREDICTED: SNF2 domain-containing protein CLASSY 2-like [Vigna angularis]	ko03440//Homologous recombination//Replication and repair//Genetic Information Processing	-	-	-
Unigene0067621	CLSY1	PREDICTED: SNF2 domain-containing protein CLASSY 1-like [Nelumbo nucifera]	ko03440//Homologous recombination//Replication and repair//Genetic Information Processing	-	-	-
Unigene0067655	-	PREDICTED: pericentriolar material 1 protein [Theobroma cacao]	-	-	-	-
Unigene0067660	APC1	PREDICTED: anaphase-promoting complex subunit 1 [Nelumbo nucifera]	ko04120//Ubiquitin mediated proteolysis//Folding, sorting and degradation//Genetic Information Processing	-	-	-
Unigene0067661	MPHOSPH10	PREDICTED: U3 small nucleolar ribonucleoprotein protein MPP10 isoform X1 [Solanum pennellii]	ko03008//Ribosome biogenesis in eukaryotes//Translation//Genetic Information Processing	-	-	-
Unigene0067683	-	--	-	-	-	-
Unigene0067695	SGO1	PREDICTED: shugoshin-1-like isoform X4 [Nelumbo nucifera]	-	-	-	-
Unigene0067732	CYCD1-1	PREDICTED: cyclin-D1-1 [Nelumbo nucifera]	-	-	-	-
Unigene0067768	TAF5	PREDICTED: transcription initiation factor TFIID subunit 5 [Vitis vinifera]	ko03022//Basal transcription factors//Transcription//Genetic Information Processing	-	GO:0003824//catalytic activity	GO:0090304//nucleic acid metabolic process;GO:0044260//cellular macromolecule metabolic process;GO:0044249//cellular biosynthetic process;GO:0006807//nitrogen compound metabolic process;GO:0019438//aromatic compound biosynthetic process;GO:1901362//organic cyclic compound biosynthetic process;GO:0060255//regulation of macromolecule metabolic process;GO:0009058//biosynthetic process;GO:0097659//nu…
Unigene0067778	AGD12	ARF-GAP domain 13 isoform 3 [Theobroma cacao]	ko04144//Endocytosis//Transport and catabolism//Cellular Processes	GO:0043226//organelle;GO:0044464//cell part;GO:0043227//membrane-bounded organelle;GO:0016020//membrane;GO:0043231//intracellular membrane-bounded organelle;GO:0005622//intracellular;GO:0043229//intracellular organelle;GO:0005623//cell;GO:0044424//intracellular part	GO:0008289//lipid binding;GO:0046914//transition metal ion binding;GO:0046872//metal ion binding;GO:0005488//binding;GO:0043169//cation binding;GO:0043167//ion binding	GO:0071702//organic substance transport;GO:0032502//developmental process;GO:0009987//cellular process;GO:1902578//single-organism localization;GO:0045184//establishment of protein localization;GO:0044699//single-organism process;GO:0034613//cellular protein localization;GO:0051641//cellular localization;GO:0006886//intracellular protein transport;GO:0051649//establishment of localization in cell…
Unigene0067780	AGD12	PREDICTED: probable ADP-ribosylation factor GTPase-activating protein AGD13 isoform X2 [Eucalyptus grandis]	ko04144//Endocytosis//Transport and catabolism//Cellular Processes	-	-	-
Unigene0067864	Dhx36	PREDICTED: DExH-box ATP-dependent RNA helicase DExH3 [Elaeis guineensis]	ko03018//RNA degradation//Folding, sorting and degradation//Genetic Information Processing	-	GO:0017111//nucleoside-triphosphatase activity;GO:0036094//small molecule binding;GO:0042623//ATPase activity, coupled;GO:0016462//pyrophosphatase activity;GO:0001882//nucleoside binding;GO:0016787//hydrolase activity;GO:1901363//heterocyclic compound binding;GO:0005488//binding;GO:0016887//ATPase activity;GO:0016817//hydrolase activity, acting on acid anhydrides;GO:0016818//hydrolase activity, a…	-
Unigene0067903	-	--	-	-	-	-
Unigene0067985	At4g26100	PREDICTED: casein kinase 1-like protein 10 [Nelumbo nucifera]	-	-	GO:1901363//heterocyclic compound binding;GO:0001883//purine nucleoside binding;GO:0032550//purine ribonucleoside binding;GO:0001882//nucleoside binding;GO:0003824//catalytic activity;GO:0016301//kinase activity;GO:0032549//ribonucleoside binding;GO:0036094//small molecule binding;GO:0005488//binding;GO:0016740//transferase activity;GO:0097159//organic cyclic compound binding;GO:0016773//phosphot…	GO:0019538//protein metabolic process;GO:0043412//macromolecule modification;GO:0043170//macromolecule metabolic process;GO:0044260//cellular macromolecule metabolic process;GO:0044267//cellular protein metabolic process;GO:0006793//phosphorus metabolic process;GO:0006464//cellular protein modification process;GO:0009987//cellular process;GO:0071704//organic substance metabolic process;GO:0006796…
Unigene0068044	-	PREDICTED: kinesin-4 isoform X4 [Musa acuminata subsp. malaccensis] [Musa acuminata]	-	-	-	-
Unigene0068087	-	--	-	-	-	-
Unigene0068175	SAPK10	PREDICTED: serine/threonine-protein kinase SAPK10 [Amborella trichopoda]	ko04075//Plant hormone signal transduction//Signal transduction//Environmental Information Processing	GO:0043231//intracellular membrane-bounded organelle;GO:0005737//cytoplasm;GO:0043226//organelle;GO:0044464//cell part;GO:0044444//cytoplasmic part;GO:0005622//intracellular;GO:0043229//intracellular organelle;GO:0005623//cell;GO:0043227//membrane-bounded organelle;GO:0044424//intracellular part	GO:0004672//protein kinase activity;GO:0016740//transferase activity;GO:0019899//enzyme binding;GO:0016301//kinase activity;GO:0032550//purine ribonucleoside binding;GO:0004674//protein serine/threonine kinase activity;GO:0097367//carbohydrate derivative binding;GO:0097159//organic cyclic compound binding;GO:0019902//phosphatase binding;GO:0001882//nucleoside binding;GO:0016772//transferase activ…	GO:0008610//lipid biosynthetic process;GO:0032412//regulation of ion transmembrane transporter activity;GO:0044238//primary metabolic process;GO:0044262//cellular carbohydrate metabolic process;GO:0009617//response to bacterium;GO:0005984//disaccharide metabolic process;GO:0072593//reactive oxygen species metabolic process;GO:0006629//lipid metabolic process;GO:0051704//multi-organism process;GO:…
Unigene0068225	-	PREDICTED: uncharacterized protein LOC100266910 isoform X1 [Vitis vinifera]	-	-	-	-
Unigene0068226	-	PREDICTED: uncharacterized protein LOC100266910 isoform X1 [Vitis vinifera]	-	-	-	-
Unigene0068229	-	PREDICTED: uncharacterized protein LOC100266910 isoform X1 [Vitis vinifera]	-	-	-	-
Unigene0068370	At1g03560	PREDICTED: pentatricopeptide repeat-containing protein At1g03560, mitochondrial [Nelumbo nucifera]	-	-	-	-
Unigene0068376	CESA1	PREDICTED: probable cellulose synthase A catalytic subunit 1 [UDP-forming] [Elaeis guineensis]	-	-	-	-
Unigene0068378	CESA3	PREDICTED: probable cellulose synthase A catalytic subunit 3 [UDP-forming] isoform X1 [Nelumbo nucifera]	-	-	-	-
Unigene0068491	IMPA1	PREDICTED: importin subunit alpha-1 [Nelumbo nucifera]	-	GO:0005622//intracellular;GO:0005623//cell;GO:0044424//intracellular part;GO:0044464//cell part	GO:0005215//transporter activity;GO:0022892//substrate-specific transporter activity	GO:0006810//transport;GO:0051641//cellular localization;GO:0051234//establishment of localization;GO:0006886//intracellular protein transport;GO:0051649//establishment of localization in cell;GO:0033036//macromolecule localization;GO:0008104//protein localization;GO:0071702//organic substance transport;GO:0070727//cellular macromolecule localization;GO:0015031//protein transport;GO:0034613//cellu…
Unigene0068492	IMPA2	PREDICTED: importin subunit alpha-1 [Nelumbo nucifera]	-	GO:0005622//intracellular;GO:0005623//cell;GO:0044424//intracellular part;GO:0044464//cell part	GO:0022892//substrate-specific transporter activity;GO:0005215//transporter activity	GO:0006886//intracellular protein transport;GO:0046907//intracellular transport;GO:0051234//establishment of localization;GO:0070727//cellular macromolecule localization;GO:0045184//establishment of protein localization;GO:0051649//establishment of localization in cell;GO:0051179//localization;GO:0006810//transport;GO:0008104//protein localization;GO:0033036//macromolecule localization;GO:0051641…
Unigene0068572	METK2	PREDICTED: S-adenosylmethionine synthase 2 [Eucalyptus grandis]	ko01100//Metabolic pathways//Global and Overview//Metabolism;ko01110//Biosynthesis of secondary metabolites//Global and Overview//Metabolism;ko01230//Biosynthesis of amino acids//Global and Overview//Metabolism;ko00270//Cysteine and methionine metabolism//Amino acid metabolism//Metabolism	GO:0044424//intracellular part;GO:0005623//cell;GO:0005622//intracellular;GO:0044464//cell part	GO:0016740//transferase activity;GO:0003824//catalytic activity;GO:0097159//organic cyclic compound binding;GO:0032550//purine ribonucleoside binding;GO:0097367//carbohydrate derivative binding;GO:0016765//transferase activity, transferring alkyl or aryl (other than methyl) groups;GO:0036094//small molecule binding;GO:0005488//binding;GO:0001882//nucleoside binding;GO:0043169//cation binding;GO:1…	GO:0044249//cellular biosynthetic process;GO:0009108//coenzyme biosynthetic process;GO:0051188//cofactor biosynthetic process;GO:0009058//biosynthetic process;GO:0044237//cellular metabolic process;GO:0006732//coenzyme metabolic process;GO:0051186//cofactor metabolic process;GO:0008152//metabolic process;GO:0009987//cellular process
Unigene0068573	SAMS2	PREDICTED: S-adenosylmethionine synthase 2 [Gossypium raimondii]	ko01100//Metabolic pathways//Global and Overview//Metabolism;ko01110//Biosynthesis of secondary metabolites//Global and Overview//Metabolism;ko01230//Biosynthesis of amino acids//Global and Overview//Metabolism;ko00270//Cysteine and methionine metabolism//Amino acid metabolism//Metabolism	GO:0044424//intracellular part;GO:0005623//cell;GO:0044464//cell part;GO:0005622//intracellular	GO:0097367//carbohydrate derivative binding;GO:0043167//ion binding;GO:0043169//cation binding;GO:0001882//nucleoside binding;GO:0016740//transferase activity;GO:0001883//purine nucleoside binding;GO:0097159//organic cyclic compound binding;GO:0032550//purine ribonucleoside binding;GO:0036094//small molecule binding;GO:0016765//transferase activity, transferring alkyl or aryl (other than methyl) …	GO:0044237//cellular metabolic process;GO:0006732//coenzyme metabolic process;GO:0009987//cellular process;GO:0051186//cofactor metabolic process;GO:0008152//metabolic process;GO:0009058//biosynthetic process;GO:0044249//cellular biosynthetic process;GO:0051188//cofactor biosynthetic process;GO:0009108//coenzyme biosynthetic process
Unigene0068581	At1g04910	DUF246 domain-containing protein At1g04910 [Anthurium amnicola]	-	-	-	-
Unigene0068656	MYB44	PREDICTED: myb-related protein 330-like [Nelumbo nucifera]	-	-	-	-
Unigene0068657	MYB44	PREDICTED: myb-related protein 330-like [Nelumbo nucifera]	-	-	-	-
Unigene0068695	-	--	-	-	-	-
Unigene0068709	-	--	-	-	-	-
Unigene0068754	ACO	ACC oxidase 5 [Actinidia chinensis]	ko01100//Metabolic pathways//Global and Overview//Metabolism;ko01110//Biosynthesis of secondary metabolites//Global and Overview//Metabolism;ko00270//Cysteine and methionine metabolism//Amino acid metabolism//Metabolism	-	GO:0003824//catalytic activity;GO:0043169//cation binding;GO:0043167//ion binding;GO:0005488//binding;GO:0016491//oxidoreductase activity;GO:0016705//oxidoreductase activity, acting on paired donors, with incorporation or reduction of molecular oxygen	GO:0044699//single-organism process;GO:0044710//single-organism metabolic process;GO:0008152//metabolic process
Unigene0068799	Acin1	PREDICTED: apoptotic chromatin condensation inducer in the nucleus [Jatropha curcas]	ko03040//Spliceosome//Transcription//Genetic Information Processing;ko03013//RNA transport//Translation//Genetic Information Processing;ko03015//mRNA surveillance pathway//Translation//Genetic Information Processing	-	-	GO:0044699//single-organism process;GO:0016043//cellular component organization;GO:0090304//nucleic acid metabolic process;GO:0044763//single-organism cellular process;GO:0043170//macromolecule metabolic process;GO:0051128//regulation of cellular component organization;GO:0006139//nucleobase-containing compound metabolic process;GO:0034641//cellular nitrogen compound metabolic process;GO:0050794/…
Unigene0068802	NOP5-2	PREDICTED: probable nucleolar protein 5-2 isoform X2 [Nelumbo nucifera]	ko03008//Ribosome biogenesis in eukaryotes//Translation//Genetic Information Processing	-	-	-
Unigene0068807	LUH	PREDICTED: transcriptional corepressor LEUNIG_HOMOLOG-like [Nelumbo nucifera]	-	-	GO:0003824//catalytic activity;GO:0016740//transferase activity	-
Unigene0068834	-	PREDICTED: uncharacterized protein LOC104597057 isoform X2 [Nelumbo nucifera]	-	-	-	-
Unigene0068877	-	--	-	-	-	-
Unigene0068904	UBA2	PREDICTED: ubiquitin-activating enzyme E1 1 isoform X1 [Elaeis guineensis]	ko04120//Ubiquitin mediated proteolysis//Folding, sorting and degradation//Genetic Information Processing	-	-	-
Unigene0068905	UBA2	PREDICTED: ubiquitin-activating enzyme E1 1-like [Phoenix dactylifera]	ko04120//Ubiquitin mediated proteolysis//Folding, sorting and degradation//Genetic Information Processing	-	-	-
Unigene0068990	GSNAP	PREDICTED: gamma-soluble NSF attachment protein [Amborella trichopoda]	-	-	-	-
Unigene0069090	ACBP3	PREDICTED: acyl-CoA-binding domain-containing protein 3-like isoform X3 [Nelumbo nucifera]	-	-	-	-
Unigene0069181	BGAL16	PREDICTED: beta-galactosidase 16 isoform X2 [Nelumbo nucifera]	-	GO:0005576//extracellular region	GO:0016798//hydrolase activity, acting on glycosyl bonds;GO:0004553//hydrolase activity, hydrolyzing O-glycosyl compounds;GO:0016787//hydrolase activity;GO:0003824//catalytic activity	GO:0008152//metabolic process
Unigene0069186	PUX1	PREDICTED: plant UBX domain-containing protein 1 isoform X1 [Nelumbo nucifera]	-	-	-	-
Unigene0069197	JMJ25	PREDICTED: LOW QUALITY PROTEIN: lysine-specific demethylase JMJ25-like [Phoenix dactylifera]	-	-	-	-
Unigene0069210	At5g10080	PREDICTED: aspartic proteinase-like protein 1 isoform X1 [Nelumbo nucifera]	-	GO:0044425//membrane part;GO:0031224//intrinsic component of membrane;GO:0016020//membrane;GO:0031225//anchored component of membrane	GO:0016787//hydrolase activity;GO:0003824//catalytic activity	GO:0043170//macromolecule metabolic process;GO:0019538//protein metabolic process;GO:0071704//organic substance metabolic process;GO:0044238//primary metabolic process;GO:0008152//metabolic process
Unigene0069227	-	PREDICTED: uncharacterized protein LOC104602759 [Nelumbo nucifera]	-	-	-	-
Unigene0069238	SQE1	squalene epoxidase [Chlorophytum borivilianum]	ko01100//Metabolic pathways//Global and Overview//Metabolism;ko01110//Biosynthesis of secondary metabolites//Global and Overview//Metabolism;ko01130//Biosynthesis of antibiotics//Global and Overview//Metabolism;ko00100//Steroid biosynthesis//Lipid metabolism//Metabolism;ko00909//Sesquiterpenoid and triterpenoid biosynthesis//Metabolism of terpenoids and polyketides//Metabolism	GO:0031224//intrinsic component of membrane;GO:0016020//membrane;GO:0044425//membrane part	GO:0004497//monooxygenase activity;GO:0016705//oxidoreductase activity, acting on paired donors, with incorporation or reduction of molecular oxygen;GO:0003824//catalytic activity;GO:0005488//binding;GO:0097159//organic cyclic compound binding;GO:1901265//nucleoside phosphate binding;GO:0016709//oxidoreductase activity, acting on paired donors, with incorporation or reduction of molecular oxygen,…	GO:0044699//single-organism process;GO:0044710//single-organism metabolic process;GO:0008152//metabolic process
Unigene0069256	NAT6	PREDICTED: LOW QUALITY PROTEIN: nucleobase-ascorbate transporter 6 [Elaeis guineensis]	-	-	-	-
Unigene0069346	HDA9	PREDICTED: histone deacetylase 9 [Elaeis guineensis]	-	GO:0044464//cell part;GO:0043227//membrane-bounded organelle;GO:0043229//intracellular organelle;GO:0043231//intracellular membrane-bounded organelle;GO:0043226//organelle;GO:0005623//cell;GO:0005622//intracellular;GO:0044424//intracellular part	GO:0034979//NAD-dependent protein deacetylase activity;GO:0017136//NAD-dependent histone deacetylase activity;GO:0019213//deacetylase activity;GO:0003824//catalytic activity;GO:0033558//protein deacetylase activity;GO:0004407//histone deacetylase activity;GO:0016810//hydrolase activity, acting on carbon-nitrogen (but not peptide) bonds;GO:0016787//hydrolase activity;GO:0016811//hydrolase activity…	GO:0010468//regulation of gene expression;GO:0016570//histone modification;GO:0016575//histone deacetylation;GO:0044699//single-organism process;GO:0006476//protein deacetylation;GO:0044237//cellular metabolic process;GO:0016569//covalent chromatin modification;GO:0044710//single-organism metabolic process;GO:0044763//single-organism cellular process;GO:0019222//regulation of metabolic process;GO…
Unigene0069387	BHLH133	PREDICTED: transcription factor bHLH68-like [Nelumbo nucifera]	-	-	-	-
Unigene0069402	-	--	-	-	-	-
Unigene0069473	TIR1	PREDICTED: protein TRANSPORT INHIBITOR RESPONSE 1-like [Phoenix dactylifera]	ko04075//Plant hormone signal transduction//Signal transduction//Environmental Information Processing	-	-	GO:0010033//response to organic substance;GO:0009719//response to endogenous stimulus;GO:0070887//cellular response to chemical stimulus;GO:0023052//signaling;GO:0042221//response to chemical;GO:0050789//regulation of biological process;GO:0044763//single-organism cellular process;GO:0007154//cell communication;GO:0044699//single-organism process;GO:0050896//response to stimulus;GO:0044700//singl…
Unigene0069582	At5g41260	PREDICTED: probable serine/threonine-protein kinase At5g41260 [Nelumbo nucifera]	ko04075//Plant hormone signal transduction//Signal transduction//Environmental Information Processing	-	GO:0003824//catalytic activity;GO:0001883//purine nucleoside binding;GO:0016740//transferase activity;GO:0097367//carbohydrate derivative binding;GO:0001882//nucleoside binding;GO:0036094//small molecule binding;GO:0032550//purine ribonucleoside binding;GO:0097159//organic cyclic compound binding;GO:0016772//transferase activity, transferring phosphorus-containing groups;GO:0032549//ribonucleosid…	GO:0043412//macromolecule modification;GO:0044238//primary metabolic process;GO:0044237//cellular metabolic process;GO:0006796//phosphate-containing compound metabolic process;GO:0044267//cellular protein metabolic process;GO:0006793//phosphorus metabolic process;GO:0071704//organic substance metabolic process;GO:0036211//protein modification process;GO:0008152//metabolic process;GO:0043170//macr…
Unigene0069587	PDS5A	PREDICTED: sister chromatid cohesion protein PDS5 homolog A isoform X3 [Nelumbo nucifera]	-	-	-	-
Unigene0069598	PDS5B	PREDICTED: sister chromatid cohesion protein PDS5 homolog A isoform X2 [Nelumbo nucifera]	-	-	-	-
Unigene0069651	NAR1	protein NAR1 [Ananas comosus]	-	-	-	-
Unigene0069696	-	--	-	-	-	-
Unigene0069709	At2g05160	PREDICTED: zinc finger CCCH domain-containing protein 18-like isoform X1 [Nelumbo nucifera]	-	-	-	-
Unigene0069711	-	--	-	-	-	-
Unigene0069729	-	orf107b gene product (mitochondrion) [Beta vulgaris subsp. vulgaris] [Beta vulgaris]	-	-	-	-
Unigene0069750	MPK10	Mitogen-activated protein kinase 10 [Anthurium amnicola]	-	-	GO:0001883//purine nucleoside binding;GO:0016740//transferase activity;GO:0003824//catalytic activity;GO:1901363//heterocyclic compound binding;GO:0097367//carbohydrate derivative binding;GO:0032550//purine ribonucleoside binding;GO:0004871//signal transducer activity;GO:0016301//kinase activity;GO:0032549//ribonucleoside binding;GO:0004674//protein serine/threonine kinase activity;GO:0005057//re…	GO:0043170//macromolecule metabolic process;GO:0050793//regulation of developmental process;GO:0006796//phosphate-containing compound metabolic process;GO:0071840//cellular component organization or biogenesis;GO:0048509//regulation of meristem development;GO:0036211//protein modification process;GO:0050789//regulation of biological process;GO:0044085//cellular component biogenesis;GO:0051239//re…
Unigene0069798	nphp3	kinesin light chain 3 isoform X2 [Asparagus officinalis]	-	-	-	-
Unigene0070036	-	--	-	-	-	-
Unigene0070041	ROPGAP1	PREDICTED: rho GTPase-activating protein 5-like [Nelumbo nucifera]	-	-	-	GO:0065007//biological regulation;GO:0050789//regulation of biological process;GO:0050794//regulation of cellular process
Unigene0070079	UBC22	PREDICTED: ubiquitin-conjugating enzyme E2 22 isoform X1 [Nelumbo nucifera]	ko04120//Ubiquitin mediated proteolysis//Folding, sorting and degradation//Genetic Information Processing	-	-	-
Unigene0070095	HI_1400	PREDICTED: 5'-3' exoribonuclease-like isoform X2 [Phoenix dactylifera]	-	-	-	-
Unigene0070116	TBL2	PREDICTED: transducin beta-like protein 2 [Nelumbo nucifera]	-	-	-	-
Unigene0070204	DAPB2	PREDICTED: 4-hydroxy-tetrahydrodipicolinate reductase 1, chloroplastic-like isoform X1 [Nelumbo nucifera]	ko01100//Metabolic pathways//Global and Overview//Metabolism;ko01110//Biosynthesis of secondary metabolites//Global and Overview//Metabolism;ko01130//Biosynthesis of antibiotics//Global and Overview//Metabolism;ko01120//Microbial metabolism in diverse environments//Global and Overview//Metabolism;ko01230//Biosynthesis of amino acids//Global and Overview//Metabolism;ko00300//Lysine biosynthesis//A…	-	-	-
Unigene0070213	-	--	-	-	-	-
Unigene0070263	KAS2	PREDICTED: 3-oxoacyl-[acyl-carrier-protein] synthase II, chloroplastic-like isoform X2 [Nelumbo nucifera]	ko01100//Metabolic pathways//Global and Overview//Metabolism;ko01212//Fatty acid metabolism//Global and Overview//Metabolism;ko00061//Fatty acid biosynthesis//Lipid metabolism//Metabolism;ko00780//Biotin metabolism//Metabolism of cofactors and vitamins//Metabolism	-	GO:0016746//transferase activity, transferring acyl groups;GO:0003824//catalytic activity;GO:0016740//transferase activity	GO:0043436//oxoacid metabolic process;GO:0032787//monocarboxylic acid metabolic process;GO:0019752//carboxylic acid metabolic process;GO:0044237//cellular metabolic process;GO:0044699//single-organism process;GO:0044281//small molecule metabolic process;GO:0009987//cellular process;GO:0006629//lipid metabolic process;GO:0044710//single-organism metabolic process;GO:0044763//single-organism cellul…
Unigene0070282	Gigyf2	PREDICTED: uncharacterized protein LOC104588158 isoform X2 [Nelumbo nucifera]	-	-	-	-
Unigene0070488	ARPC5A	PREDICTED: actin-related protein 2/3 complex subunit 5A [Fragaria vesca subsp. vesca] [Fragaria vesca]	ko04144//Endocytosis//Transport and catabolism//Cellular Processes	GO:0043229//intracellular organelle;GO:0005623//cell;GO:0005856//cytoskeleton;GO:0005622//intracellular;GO:0043226//organelle;GO:0043232//intracellular non-membrane-bounded organelle;GO:0044464//cell part;GO:0043234//protein complex;GO:0044424//intracellular part;GO:0043228//non-membrane-bounded organelle;GO:0032991//macromolecular complex	-	GO:0007010//cytoskeleton organization;GO:0030833//regulation of actin filament polymerization;GO:0008064//regulation of actin polymerization or depolymerization;GO:0009987//cellular process;GO:0048518//positive regulation of biological process;GO:0071822//protein complex subunit organization;GO:0048522//positive regulation of cellular process;GO:0033043//regulation of organelle organization;GO:00…
Unigene0070514	TENA_E	Seed maturation protein PM36, partial [Anthurium amnicola]	-	-	-	-
Unigene0070545	ARI5	PREDICTED: E3 ubiquitin-protein ligase RNF144A [Juglans regia]	-	-	-	-
Unigene0070592	MLH1	MLH1, partial [Chimonanthus praecox]	ko03430//Mismatch repair//Replication and repair//Genetic Information Processing	-	-	-
Unigene0070768	EMB2745	PREDICTED: pentatricopeptide repeat-containing protein At1g09900 [Nelumbo nucifera]	-	-	-	-
Unigene0070795	Os06g0508700	PREDICTED: probable methionine--tRNA ligase [Nelumbo nucifera]	ko00970//Aminoacyl-tRNA biosynthesis//Translation//Genetic Information Processing;ko00450//Selenocompound metabolism//Metabolism of other amino acids//Metabolism	-	-	-
Unigene0070815	PERK10	PREDICTED: proline-rich receptor-like protein kinase PERK8 [Nelumbo nucifera]	-	GO:0016020//membrane	GO:0004672//protein kinase activity;GO:0032550//purine ribonucleoside binding;GO:0003824//catalytic activity;GO:0016772//transferase activity, transferring phosphorus-containing groups;GO:0036094//small molecule binding;GO:0005488//binding;GO:0016301//kinase activity;GO:1901363//heterocyclic compound binding;GO:0097159//organic cyclic compound binding;GO:0001883//purine nucleoside binding;GO:0016…	GO:0036211//protein modification process;GO:0006464//cellular protein modification process;GO:0019538//protein metabolic process;GO:0009987//cellular process;GO:0044260//cellular macromolecule metabolic process;GO:0006793//phosphorus metabolic process;GO:0044267//cellular protein metabolic process;GO:0044237//cellular metabolic process;GO:0043170//macromolecule metabolic process;GO:0006796//phosp…
Unigene0070837	DRP3A	Dynamin-related protein 3A, partial [Anthurium amnicola]	-	-	GO:0017111//nucleoside-triphosphatase activity;GO:0016462//pyrophosphatase activity;GO:0016818//hydrolase activity, acting on acid anhydrides, in phosphorus-containing anhydrides;GO:0032549//ribonucleoside binding;GO:0001883//purine nucleoside binding;GO:0097367//carbohydrate derivative binding;GO:0036094//small molecule binding;GO:1901363//heterocyclic compound binding;GO:0016817//hydrolase acti…	-
Unigene0070839	DRP3A	Dynamin-related protein 3A, partial [Anthurium amnicola]	-	-	GO:0017111//nucleoside-triphosphatase activity;GO:1901363//heterocyclic compound binding;GO:0016462//pyrophosphatase activity;GO:0001882//nucleoside binding;GO:0097367//carbohydrate derivative binding;GO:0032549//ribonucleoside binding;GO:0016818//hydrolase activity, acting on acid anhydrides, in phosphorus-containing anhydrides;GO:0097159//organic cyclic compound binding;GO:0032550//purine ribon…	-
Unigene0070852	Os07g0682400	PREDICTED: zinc finger CCCH domain-containing protein 53 isoform X1 [Vitis vinifera]	-	-	-	-
Unigene0070927	DBR	probably inactive leucine-rich repeat receptor-like protein kinase At5g48380 [Ananas comosus]	-	-	-	-
Unigene0070957	-	--	-	-	-	-
Unigene0070964	At4g22990	PREDICTED: SPX domain-containing membrane protein At4g22990 [Vitis vinifera]	-	-	-	GO:0009987//cellular process;GO:0044763//single-organism cellular process;GO:0044699//single-organism process
Unigene0071026	HXK1	hexokinase [Citrus sinensis]	ko01100//Metabolic pathways//Global and Overview//Metabolism;ko01110//Biosynthesis of secondary metabolites//Global and Overview//Metabolism;ko01130//Biosynthesis of antibiotics//Global and Overview//Metabolism;ko01120//Microbial metabolism in diverse environments//Global and Overview//Metabolism;ko01200//Carbon metabolism//Global and Overview//Metabolism;ko00500//Starch and sucrose metabolism//C…	-	GO:0036094//small molecule binding;GO:0097367//carbohydrate derivative binding;GO:0001882//nucleoside binding;GO:0003824//catalytic activity;GO:0016773//phosphotransferase activity, alcohol group as acceptor;GO:1901363//heterocyclic compound binding;GO:0016772//transferase activity, transferring phosphorus-containing groups;GO:0001883//purine nucleoside binding;GO:0016740//transferase activity;GO…	GO:0019752//carboxylic acid metabolic process;GO:0044763//single-organism cellular process;GO:0043436//oxoacid metabolic process;GO:0006090//pyruvate metabolic process;GO:0006793//phosphorus metabolic process;GO:0008152//metabolic process;GO:0071704//organic substance metabolic process;GO:0044238//primary metabolic process;GO:0044281//small molecule metabolic process;GO:0044237//cellular metaboli…
Unigene0071060	At1g60070	PREDICTED: AP-1 complex subunit gamma-2 [Nelumbo nucifera]	-	-	-	-
Unigene0071088	-	--	-	-	-	-
Unigene0071105	At2g30600/At2g30610	PREDICTED: BTB/POZ domain-containing protein At2g30600 [Nelumbo nucifera]	-	-	-	-
Unigene0071176	POK2	PREDICTED: kinesin-like protein KIN-12F isoform X1 [Nelumbo nucifera]	-	GO:0043232//intracellular non-membrane-bounded organelle;GO:0043228//non-membrane-bounded organelle;GO:0032991//macromolecular complex;GO:0005622//intracellular;GO:0043234//protein complex;GO:0044424//intracellular part;GO:0044446//intracellular organelle part;GO:0043226//organelle;GO:0044464//cell part;GO:0044422//organelle part;GO:0043229//intracellular organelle;GO:0015630//microtubule cytoske…	GO:0005488//binding	GO:0044699//single-organism process;GO:0044763//single-organism cellular process;GO:0009987//cellular process
Unigene0071211	NPF8.3	PREDICTED: protein NRT1/ PTR FAMILY 8.3-like [Phoenix dactylifera]	-	GO:0016020//membrane;GO:0044425//membrane part;GO:0031224//intrinsic component of membrane	-	GO:0071705//nitrogen compound transport;GO:0042886//amide transport;GO:0071702//organic substance transport;GO:1902578//single-organism localization;GO:0044765//single-organism transport;GO:0051179//localization;GO:0015833//peptide transport;GO:0006810//transport;GO:0051234//establishment of localization;GO:0044699//single-organism process
Unigene0071245	UVR8	PREDICTED: ultraviolet-B receptor UVR8 isoform X2 [Elaeis guineensis]	-	-	-	-
Unigene0071261	-	--	-	-	-	-
Unigene0071460	yipf6	PREDICTED: protein YIPF6 homolog [Tarenaya hassleriana]	-	-	-	-
[truncated: 484 more rows]
