# Supplementary material for: Small RNA and Degradome Sequencing in Floral Bud Reveal Roles of miRNAs in Dormancy Release of Chimonanthus praecox
Source: Int J Mol Sci. 2023 Feb 20;24(4):4210. doi: 10.3390/ijms24044210 (PMC9964840; doi:10.3390/ijms24044210)
Supplement: Supplementary file 1 [file ijms-24-04210-s001.zip › Table S11. 1940 miRNA-target pairs predicted by Degradome Sequencing.xlsx]

## Sheet: Table S11
Table S11. 1940 miRNA-target pairs predicted by Degradome Sequencing
miRNA		mRNA	symbol	cleave_site	score	Degr_Cp-categoty	Degr_Cp-pval	Degr_Cp-rawtags	Degr_Cp-normtags	Nr-annotation	ko-definition	biological-process	cellular-component	molecular-function
miR157-y	miR157-y	Unigene0038922	At4g12780	662	4.5	2	0.006	5	5	PREDICTED: auxilin-related protein 2-like [Brachypodium distachyon]	-	-	-	-
	miR157-y	Unigene0052327	fusA2	240	4	2	0.006	2	2	PREDICTED: elongation factor G-2, chloroplastic-like [Phoenix dactylifera]	-	GO:0044464//cell part;GO:0005623//cell	GO:1901363//heterocyclic compound binding;GO:0005488//binding;GO:0001882//nucleoside binding;GO:0016787//hydrolase activity;GO:0032549//ribonucleoside binding;GO:0032550//purine ribonucleoside binding;GO:0003824//catalytic activity;GO:0036094//small molecule binding;GO:0016462//pyrophosphatase activity;GO:0008135//translation factor activity, RNA binding;GO:0097367//carbohydrate derivative bindin…	GO:1901576//organic substance biosynthetic process;GO:0009058//biosynthetic process;GO:0043170//macromolecule metabolic process;GO:0034645//cellular macromolecule biosynthetic process;GO:0071704//organic substance metabolic process;GO:0009987//cellular process;GO:0044260//cellular macromolecule metabolic process;GO:0044249//cellular biosynthetic process;GO:0009059//macromolecule biosynthetic proc…
	miR157-y	Unigene0108428	CP31A	1282	3.5	3	0.028	3	3	PREDICTED: 28 kDa ribonucleoprotein, chloroplastic-like [Nelumbo nucifera]	-	-	-	-
	miR157-y	Unigene0093250	emc2-a	138	4	2	0.006	3	3	PREDICTED: ER membrane protein complex subunit 2-A [Elaeis guineensis]	-	-	GO:0003824//catalytic activity	-
	miR157-y	Unigene0022586	LHP1	492	4	4	0.006	1	1	PREDICTED: chromo domain-containing protein LHP1-like isoform X2 [Nelumbo nucifera]	-	-	-	GO:0009889//regulation of biosynthetic process;GO:0051276//chromosome organization;GO:0032502//developmental process;GO:0048731//system development;GO:0044763//single-organism cellular process;GO:0043933//macromolecular complex subunit organization;GO:0007275//multicellular organism development;GO:0048856//anatomical structure development;GO:0071840//cellular component organization or biogenesis;…
	miR157-y	Unigene0036496	-	453	4.5	2	0.006	10	5	hypothetical protein L484_009299 [Morus notabilis]	-	-	-	-
	miR157-y	Unigene0073970	Plekhm3	3475	4	4	0.006	1	1	plekhm3 [Gossypium arboreum]	-	-	-	-
	miR157-y	Unigene0065088	EFL4	698	4.5	2	0.006	3	3	PREDICTED: protein ELF4-LIKE 4-like [Nelumbo nucifera]	-	-	-	-
	miR157-y	Unigene0098421	CYCU4-1	478	4.5	2	0.006	3	3	PREDICTED: cyclin-U4-1-like [Nelumbo nucifera]	-	-	GO:0019900//kinase binding;GO:0016772//transferase activity, transferring phosphorus-containing groups;GO:0005515//protein binding;GO:0005488//binding;GO:0019899//enzyme binding;GO:0003824//catalytic activity;GO:0016740//transferase activity	GO:0006793//phosphorus metabolic process;GO:0006796//phosphate-containing compound metabolic process;GO:0009987//cellular process;GO:0008152//metabolic process;GO:0044237//cellular metabolic process
	miR157-y	Unigene0073918	-	2184	4.5	4	0.006	1	0.5	PREDICTED: DEAD-box ATP-dependent RNA helicase 42-like [Nelumbo nucifera]	-	-	-	-
	miR157-y	Unigene0049886	RNFT1	830	4	2	0.006	4	4	PREDICTED: RING finger and transmembrane domain-containing protein 2 [Nelumbo nucifera]	-	-	-	-
	miR157-y	Unigene0064320	CALS3	3353	4.5	4	0.006	1	1	PREDICTED: callose synthase 3 [Nelumbo nucifera]	-	-	GO:0016740//transferase activity;GO:0016757//transferase activity, transferring glycosyl groups;GO:0046527//glucosyltransferase activity;GO:0016758//transferase activity, transferring hexosyl groups;GO:0008194//UDP-glycosyltransferase activity;GO:0035251//UDP-glucosyltransferase activity;GO:0003824//catalytic activity	GO:0071704//organic substance metabolic process;GO:0044262//cellular carbohydrate metabolic process;GO:0005976//polysaccharide metabolic process;GO:0044238//primary metabolic process;GO:0044237//cellular metabolic process;GO:0044264//cellular polysaccharide metabolic process;GO:0044042//glucan metabolic process;GO:0005975//carbohydrate metabolic process;GO:0006074//(1->3)-beta-D-glucan metabolic …
	miR157-y	Unigene0055068	SPBC23E6.02	3079	4.5	0	0.02	56	28	PREDICTED: helicase-like transcription factor CHR28 [Vitis vinifera]	-	-	-	-
	miR157-y	Unigene0002460	PEX7	1161	4	4	0	1	1	PREDICTED: peroxisome biogenesis protein 7-like [Nelumbo nucifera]	ko04146//Peroxisome//Transport and catabolism//Cellular Processes	-	-	-
	miR157-y	Unigene0043667	TIF3H1	682	4	2	0.006	6	6	PREDICTED: eukaryotic translation initiation factor 3 subunit H [Vitis vinifera]	ko03013//RNA transport//Translation//Genetic Information Processing	GO:0005623//cell;GO:0043234//protein complex;GO:0005737//cytoplasm;GO:0044464//cell part;GO:0032991//macromolecular complex;GO:0030529//intracellular ribonucleoprotein complex;GO:0044424//intracellular part;GO:1990904//ribonucleoprotein complex;GO:0005622//intracellular;GO:0044444//cytoplasmic part;GO:0070993//translation preinitiation complex	-	GO:0050794//regulation of cellular process;GO:0036211//protein modification process;GO:0022607//cellular component assembly;GO:0080090//regulation of primary metabolic process;GO:0044237//cellular metabolic process;GO:0006417//regulation of translation;GO:0034622//cellular macromolecular complex assembly;GO:0050789//regulation of biological process;GO:0016043//cellular component organization;GO:0…
	miR157-y	Unigene0011704	RH21	1578	4.5	2	0.006	2	2	PREDICTED: DEAD-box ATP-dependent RNA helicase 21 [Vitis vinifera]	ko03040//Spliceosome//Transcription//Genetic Information Processing	-	-	-
	miR157-y	Unigene0009151	TIC	383	4	2	0.006	11	11	PREDICTED: protein TIME FOR COFFEE-like isoform X2 [Nelumbo nucifera]	-	-	-	-
	miR157-y	Unigene0025238	RAP2-3	474	4.5	3	0.028	2	2	PREDICTED: ethylene-responsive transcription factor ERF071 [Ziziphus jujuba]	-	-	-	-
	miR157-y	Unigene0042948	-	2109	4.5	4	0.006	1	1	GTP-dependent nucleic acid-binding protein engD [Anthurium amnicola]	-	-	-	-
	miR157-y	Unigene0043885	ADH	805	4	2	0.006	6	3	PREDICTED: alcohol dehydrogenase 1-like [Nelumbo nucifera]	ko01100//Metabolic pathways//Global and Overview//Metabolism;ko01110//Biosynthesis of secondary metabolites//Global and Overview//Metabolism;ko01120//Microbial metabolism in diverse environments//Global and Overview//Metabolism;ko00010//Glycolysis / Gluconeogenesis//Carbohydrate metabolism//Metabolism;ko00071//Fatty acid degradation//Lipid metabolism//Metabolism;ko00350//Tyrosine metabolism//Amin…	-	GO:0003824//catalytic activity;GO:0043167//ion binding;GO:0043169//cation binding;GO:0005488//binding	GO:0008152//metabolic process;GO:0044699//single-organism process;GO:0044710//single-organism metabolic process
	miR157-y	Unigene0036497	-	453	4.5	2	0.006	10	5	hypothetical protein L484_009299 [Morus notabilis]	-	-	-	-
	miR157-y	Unigene0007192	FER	1417	4	4	0.006	1	1	PREDICTED: receptor-like protein kinase FERONIA [Nelumbo nucifera]	-	GO:0005623//cell;GO:0071944//cell periphery;GO:0044464//cell part;GO:0016020//membrane	GO:0004672//protein kinase activity;GO:0003824//catalytic activity;GO:0016301//kinase activity;GO:0016740//transferase activity;GO:0016773//phosphotransferase activity, alcohol group as acceptor;GO:0016772//transferase activity, transferring phosphorus-containing groups	GO:0010035//response to inorganic substance;GO:0006464//cellular protein modification process;GO:0048869//cellular developmental process;GO:0051179//localization;GO:0044237//cellular metabolic process;GO:0044260//cellular macromolecule metabolic process;GO:0043170//macromolecule metabolic process;GO:0006796//phosphate-containing compound metabolic process;GO:0044765//single-organism transport;GO:…
	miR157-y	Unigene0087158	At4g19185	976	4.5	2	0.006	2	2	PREDICTED: WAT1-related protein At4g19185 isoform X1 [Nelumbo nucifera]	-	GO:0031224//intrinsic component of membrane;GO:0044425//membrane part;GO:0016020//membrane	GO:0005215//transporter activity	GO:0044699//single-organism process;GO:0009987//cellular process;GO:0044763//single-organism cellular process
	miR157-y	Unigene0070964	At4g22990	619	4	4	0.006	1	1	PREDICTED: SPX domain-containing membrane protein At4g22990 [Vitis vinifera]	-	-	-	GO:0009987//cellular process;GO:0044763//single-organism cellular process;GO:0044699//single-organism process
	miR157-y	Unigene0051073	-	476	4	4	0.006	1	1	PREDICTED: uncharacterized protein LOC104597674 [Nelumbo nucifera]	-	-	-	-
	miR157-y	Unigene0096568	At5g02860	1700	4.5	4	0.006	1	1	PREDICTED: pentatricopeptide repeat-containing protein At5g02860 [Nelumbo nucifera]	-	-	-	-
	miR157-y	Unigene0060597	ERECTA	3307	4.5	4	0.006	1	0.5	PREDICTED: LRR receptor-like serine/threonine-protein kinase ERECTA [Nelumbo nucifera]	-	-	GO:0003824//catalytic activity;GO:0016772//transferase activity, transferring phosphorus-containing groups;GO:0016740//transferase activity;GO:0004672//protein kinase activity;GO:0016301//kinase activity;GO:0016773//phosphotransferase activity, alcohol group as acceptor	GO:0065007//biological regulation;GO:0008152//metabolic process;GO:0009987//cellular process;GO:0032501//multicellular organismal process;GO:0007275//multicellular organism development;GO:0050789//regulation of biological process;GO:0044699//single-organism process;GO:0048731//system development;GO:0006950//response to stress;GO:0050896//response to stimulus;GO:0044767//single-organism developmen…
	miR157-y	Unigene0004943	-	288	4.5	3	0.028	22	22	dehydrin 10 [Eucalyptus globulus]	-	-	-	-
	miR157-y	Unigene0024914	-	14	4	2	0.006	2	2	Apurinic endonuclease-redox protein [Anthurium amnicola]	-	-	-	-
	miR157-y	Unigene0068225	-	576	4.5	2	0.006	4	1.33333	PREDICTED: uncharacterized protein LOC100266910 isoform X1 [Vitis vinifera]	-	-	-	-
	miR157-y	Unigene0025404	OEP37	945	4	4	0.006	1	1	PREDICTED: outer envelope pore protein 37, chloroplastic [Nelumbo nucifera]	-	-	-	-
	miR157-y	Unigene0048450	FdGOGAT	372	4.5	4	0.006	1	1	Ferredoxin-dependent glutamate synthase, chloroplastic [Anthurium amnicola]	ko01120//Microbial metabolism in diverse environments//Global and Overview//Metabolism;ko00630//Glyoxylate and dicarboxylate metabolism//Carbohydrate metabolism//Metabolism;ko00910//Nitrogen metabolism//Energy metabolism//Metabolism	-	GO:0016491//oxidoreductase activity;GO:0003824//catalytic activity;GO:0016638//oxidoreductase activity, acting on the CH-NH2 group of donors	GO:0006536//glutamate metabolic process;GO:1901605//alpha-amino acid metabolic process;GO:0043648//dicarboxylic acid metabolic process;GO:0019752//carboxylic acid metabolic process;GO:0044238//primary metabolic process;GO:0071704//organic substance metabolic process;GO:0044699//single-organism process;GO:0006807//nitrogen compound metabolic process;GO:0006082//organic acid metabolic process;GO:00…
	miR157-y	Unigene0043067	D6PKL2	861	4.5	4	0.006	1	1	PREDICTED: serine/threonine-protein kinase D6PKL1-like [Nelumbo nucifera]	-	-	GO:0016740//transferase activity;GO:0097159//organic cyclic compound binding;GO:0036094//small molecule binding;GO:0032550//purine ribonucleoside binding;GO:0032549//ribonucleoside binding;GO:1901363//heterocyclic compound binding;GO:0005488//binding;GO:0016772//transferase activity, transferring phosphorus-containing groups;GO:0001883//purine nucleoside binding;GO:0016301//kinase activity;GO:000…	GO:0006793//phosphorus metabolic process;GO:0044238//primary metabolic process;GO:0006796//phosphate-containing compound metabolic process;GO:0036211//protein modification process;GO:0044237//cellular metabolic process;GO:0043412//macromolecule modification;GO:0006464//cellular protein modification process;GO:0043170//macromolecule metabolic process;GO:0008152//metabolic process;GO:0044260//cellu…
	miR157-y	Unigene0068226	-	576	4.5	2	0.006	4	1.33333	PREDICTED: uncharacterized protein LOC100266910 isoform X1 [Vitis vinifera]	-	-	-	-
	miR157-y	Unigene0039560	RPB2	3660	4.5	2	0.006	7	3.5	PREDICTED: DNA-directed RNA polymerase II subunit RPB2 [Nelumbo nucifera]	ko01100//Metabolic pathways//Global and Overview//Metabolism;ko00230//Purine metabolism//Nucleotide metabolism//Metabolism;ko00240//Pyrimidine metabolism//Nucleotide metabolism//Metabolism;ko03020//RNA polymerase//Transcription//Genetic Information Processing	GO:0044464//cell part;GO:0030054//cell junction;GO:0005634//nucleus;GO:0005911//cell-cell junction;GO:0044444//cytoplasmic part;GO:0044451//nucleoplasm part;GO:0043231//intracellular membrane-bounded organelle;GO:0044428//nuclear part;GO:0005622//intracellular;GO:0044422//organelle part;GO:0043233//organelle lumen;GO:0031981//nuclear lumen;GO:0070013//intracellular organelle lumen;GO:0005737//cyt…	GO:0097159//organic cyclic compound binding;GO:0005488//binding;GO:0034062//RNA polymerase activity;GO:0036094//small molecule binding;GO:1901363//heterocyclic compound binding;GO:0043167//ion binding;GO:0001882//nucleoside binding;GO:0003676//nucleic acid binding;GO:0003824//catalytic activity;GO:0043169//cation binding;GO:0016772//transferase activity, transferring phosphorus-containing groups;…	GO:1901360//organic cyclic compound metabolic process;GO:1901362//organic cyclic compound biosynthetic process;GO:0046700//heterocycle catabolic process;GO:0006725//cellular aromatic compound metabolic process;GO:0008152//metabolic process;GO:0034654//nucleobase-containing compound biosynthetic process;GO:0044249//cellular biosynthetic process;GO:0019439//aromatic compound catabolic process;GO:00…
	miR157-y	Unigene0108748	RPS7	718	4.5	4	0.006	1	1	PREDICTED: 40S ribosomal protein S7-like [Nelumbo nucifera]	ko03010//Ribosome//Translation//Genetic Information Processing	-	-	-
	miR157-y	Unigene0061560	CCC1	705	4	4	0.006	1	0.5	cation-chloride cotransporter 1 isoform X1 [Ananas comosus]	-	-	-	-
	miR157-y	Unigene0057961	-	739	4.5	2	0.006	3	3	DnaJ subfamily C member 22 [Theobroma cacao]	-	-	-	-
	miR157-y	Unigene0043884	ADH	1256	4	2	0.006	6	3	PREDICTED: alcohol dehydrogenase 1-like [Nelumbo nucifera]	ko01100//Metabolic pathways//Global and Overview//Metabolism;ko01110//Biosynthesis of secondary metabolites//Global and Overview//Metabolism;ko01120//Microbial metabolism in diverse environments//Global and Overview//Metabolism;ko00010//Glycolysis / Gluconeogenesis//Carbohydrate metabolism//Metabolism;ko00071//Fatty acid degradation//Lipid metabolism//Metabolism;ko00350//Tyrosine metabolism//Amin…	-	GO:0005488//binding;GO:0003824//catalytic activity;GO:0043167//ion binding;GO:0043169//cation binding	GO:0044710//single-organism metabolic process;GO:0044699//single-organism process;GO:0008152//metabolic process
	miR157-y	Unigene0025226	-	505	3	4	0.006	1	1	Tetratricopeptide-like helical [Corchorus capsularis]	-	-	-	-
	miR157-y	Unigene0055959	ISPG	1561	4.5	2	0.006	10	10	PREDICTED: 4-hydroxy-3-methylbut-2-en-1-yl diphosphate synthase (ferredoxin), chloroplastic [Nelumbo nucifera]	ko01100//Metabolic pathways//Global and Overview//Metabolism;ko01110//Biosynthesis of secondary metabolites//Global and Overview//Metabolism;ko01130//Biosynthesis of antibiotics//Global and Overview//Metabolism;ko00900//Terpenoid backbone biosynthesis//Metabolism of terpenoids and polyketides//Metabolism	GO:0005737//cytoplasm;GO:0044422//organelle part;GO:0044446//intracellular organelle part;GO:0009536//plastid;GO:0043227//membrane-bounded organelle;GO:0009532//plastid stroma;GO:0044464//cell part;GO:0005623//cell;GO:0009526//plastid envelope;GO:0044424//intracellular part;GO:0031967//organelle envelope;GO:0043226//organelle;GO:0044444//cytoplasmic part;GO:0043229//intracellular organelle;GO:000…	GO:0051536//iron-sulfur cluster binding;GO:0043169//cation binding;GO:0016725//oxidoreductase activity, acting on CH or CH2 groups;GO:0016491//oxidoreductase activity;GO:0043167//ion binding;GO:0052592//oxidoreductase activity, acting on CH or CH2 groups, with an iron-sulfur protein as acceptor;GO:0051540//metal cluster binding;GO:0003824//catalytic activity;GO:0005488//binding;GO:0046914//transi…	GO:2000112//regulation of cellular macromolecule biosynthetic process;GO:0002376//immune system process;GO:0044237//cellular metabolic process;GO:0009639//response to red or far red light;GO:0010468//regulation of gene expression;GO:0001101//response to acid chemical;GO:0006082//organic acid metabolic process;GO:0006996//organelle organization;GO:0016114//terpenoid biosynthetic process;GO:0006629…
	miR157-y	Unigene0050961	PHL1	80	4.5	2	0.006	3	1.5	Myb_DNA-binding domain-containing protein/Myb_CC_LHEQLE domain-containing protein [Cephalotus follicularis]	-	-	-	-
	miR157-y	Unigene0007647	PCKA	1974	3.5	2	0.006	3	3	PREDICTED: phosphoenolpyruvate carboxykinase [ATP]-like [Juglans regia]	ko01100//Metabolic pathways//Global and Overview//Metabolism;ko01110//Biosynthesis of secondary metabolites//Global and Overview//Metabolism;ko01130//Biosynthesis of antibiotics//Global and Overview//Metabolism;ko01120//Microbial metabolism in diverse environments//Global and Overview//Metabolism;ko01200//Carbon metabolism//Global and Overview//Metabolism;ko00010//Glycolysis / Gluconeogenesis//Ca…	-	-	-
	miR157-y	Unigene0057796	STR6	1373	4.5	2	0.006	7	7	PREDICTED: rhodanese-like domain-containing protein 6 [Nelumbo nucifera]	-	-	-	-
	miR157-y	Unigene0081625	-	943	4.5	4	0.006	1	1	hypothetical protein VITISV_027817 [Vitis vinifera]	-	-	-	-
	miR157-y	Unigene0039987	At5g13110	770	4.5	3	0.028	2	1	PREDICTED: glucose-6-phosphate 1-dehydrogenase, chloroplastic [Elaeis guineensis]	ko01100//Metabolic pathways//Global and Overview//Metabolism;ko01110//Biosynthesis of secondary metabolites//Global and Overview//Metabolism;ko01130//Biosynthesis of antibiotics//Global and Overview//Metabolism;ko01120//Microbial metabolism in diverse environments//Global and Overview//Metabolism;ko01200//Carbon metabolism//Global and Overview//Metabolism;ko00480//Glutathione metabolism//Metaboli…	-	GO:0000166//nucleotide binding;GO:1901363//heterocyclic compound binding;GO:0005488//binding;GO:0003824//catalytic activity;GO:0036094//small molecule binding;GO:0097159//organic cyclic compound binding;GO:1901265//nucleoside phosphate binding	GO:0044723//single-organism carbohydrate metabolic process;GO:0044281//small molecule metabolic process;GO:0005975//carbohydrate metabolic process;GO:0044699//single-organism process;GO:0005996//monosaccharide metabolic process;GO:0019318//hexose metabolic process;GO:0008152//metabolic process;GO:0044710//single-organism metabolic process;GO:0071704//organic substance metabolic process;GO:0044238…
	miR157-y	Unigene0002596	At5g23430	1770	4	4	0.006	1	1	PREDICTED: katanin p80 WD40 repeat-containing subunit B1 homolog [Nelumbo nucifera]	-	-	-	-
	miR157-y	Unigene0066407	-	2988	4.5	2	0.006	5	2.5	E3 ubiquitin-protein ligase bre1-like isoform X2 [Asparagus officinalis]	-	-	-	-
	miR157-y	Unigene0069750	MPK10	2132	3.5	2	0.006	4	4	Mitogen-activated protein kinase 10 [Anthurium amnicola]	-	-	GO:0001883//purine nucleoside binding;GO:0016740//transferase activity;GO:0003824//catalytic activity;GO:1901363//heterocyclic compound binding;GO:0097367//carbohydrate derivative binding;GO:0032550//purine ribonucleoside binding;GO:0004871//signal transducer activity;GO:0016301//kinase activity;GO:0032549//ribonucleoside binding;GO:0004674//protein serine/threonine kinase activity;GO:0005057//re…	GO:0043170//macromolecule metabolic process;GO:0050793//regulation of developmental process;GO:0006796//phosphate-containing compound metabolic process;GO:0071840//cellular component organization or biogenesis;GO:0048509//regulation of meristem development;GO:0036211//protein modification process;GO:0050789//regulation of biological process;GO:0044085//cellular component biogenesis;GO:0051239//re…
	miR157-y	Unigene0039985	At5g13110	770	4.5	2	0.006	2	1	PREDICTED: glucose-6-phosphate 1-dehydrogenase, chloroplastic [Elaeis guineensis]	ko01100//Metabolic pathways//Global and Overview//Metabolism;ko01110//Biosynthesis of secondary metabolites//Global and Overview//Metabolism;ko01130//Biosynthesis of antibiotics//Global and Overview//Metabolism;ko01120//Microbial metabolism in diverse environments//Global and Overview//Metabolism;ko01200//Carbon metabolism//Global and Overview//Metabolism;ko00480//Glutathione metabolism//Metaboli…	-	GO:0003824//catalytic activity;GO:0005488//binding;GO:0097159//organic cyclic compound binding;GO:0000166//nucleotide binding;GO:1901363//heterocyclic compound binding;GO:0036094//small molecule binding;GO:1901265//nucleoside phosphate binding	GO:0071704//organic substance metabolic process;GO:0008152//metabolic process;GO:0044699//single-organism process;GO:0019318//hexose metabolic process;GO:0044710//single-organism metabolic process;GO:0044723//single-organism carbohydrate metabolic process;GO:0044281//small molecule metabolic process;GO:0005975//carbohydrate metabolic process;GO:0005996//monosaccharide metabolic process;GO:0044238…
	miR157-y	Unigene0025760	Marf1	2676	4.5	2	0.006	2	2	PREDICTED: meiosis arrest female protein 1 homolog [Prunus mume]	-	-	-	-
	miR157-y	Unigene0053647	IQD1	1061	3.5	2	0.006	2	2	PREDICTED: protein IQ-DOMAIN 1 isoform X1 [Nelumbo nucifera]	-	-	-	-
	miR157-y	Unigene0060596	ERECTA	1735	4.5	4	0.006	1	0.5	PREDICTED: LRR receptor-like serine/threonine-protein kinase ERECTA [Nelumbo nucifera]	-	GO:0043227//membrane-bounded organelle;GO:0043229//intracellular organelle;GO:0031224//intrinsic component of membrane;GO:0043226//organelle;GO:0043231//intracellular membrane-bounded organelle;GO:0044464//cell part;GO:0044425//membrane part;GO:0005622//intracellular;GO:0044424//intracellular part;GO:0005623//cell;GO:0016020//membrane	GO:0016491//oxidoreductase activity;GO:0036094//small molecule binding;GO:0005488//binding;GO:0016627//oxidoreductase activity, acting on the CH-CH group of donors;GO:0001883//purine nucleoside binding;GO:0032550//purine ribonucleoside binding;GO:0016628//oxidoreductase activity, acting on the CH-CH group of donors, NAD or NADP as acceptor;GO:0097367//carbohydrate derivative binding;GO:0032549//r…	GO:0009791//post-embryonic development;GO:0036211//protein modification process;GO:0007389//pattern specification process;GO:0043207//response to external biotic stimulus;GO:0009943//adaxial/abaxial axis specification;GO:0051707//response to other organism;GO:0042440//pigment metabolic process;GO:0009617//response to bacterium;GO:0048513//animal organ development;GO:0044699//single-organism proce…
	miR157-y	Unigene0076697	Pdcd2	770	4.5	4	0.006	1	1	PREDICTED: programmed cell death protein 2 isoform X1 [Nelumbo nucifera]	-	-	-	-
	miR157-y	Unigene0085968	NUA	1782	4	4	0.006	1	1	PREDICTED: nuclear-pore anchor isoform X3 [Nelumbo nucifera]	ko03013//RNA transport//Translation//Genetic Information Processing	-	-	-
	miR157-y	Unigene0001904	BLH2	1734	4	2	0.006	2	2	PREDICTED: BEL1-like homeodomain protein 4 [Nelumbo nucifera]	-	-	-	-
	miR157-y	Unigene0013069	RDR6	3228	4.5	4	0.006	1	1	PREDICTED: probable RNA-dependent RNA polymerase SHL2 [Elaeis guineensis]	-	-	GO:0016740//transferase activity;GO:1901363//heterocyclic compound binding;GO:0016772//transferase activity, transferring phosphorus-containing groups;GO:0003676//nucleic acid binding;GO:0097159//organic cyclic compound binding;GO:0016779//nucleotidyltransferase activity;GO:0003824//catalytic activity;GO:0005488//binding	GO:0044237//cellular metabolic process;GO:0031047//gene silencing by RNA;GO:0016441//posttranscriptional gene silencing;GO:0003006//developmental process involved in reproduction;GO:0090567//reproductive shoot system development;GO:0006396//RNA processing;GO:0009892//negative regulation of metabolic process;GO:0006807//nitrogen compound metabolic process;GO:0051716//cellular response to stimulus;…
	miR157-y	Unigene0083702	CCR1	525	4.5	2	0.006	8	8	Bifunctional dihydroflavonol 4-reductase/flavanone 4-reductase [Morus notabilis]	ko01100//Metabolic pathways//Global and Overview//Metabolism;ko01110//Biosynthesis of secondary metabolites//Global and Overview//Metabolism;ko00940//Phenylpropanoid biosynthesis//Biosynthesis of other secondary metabolites//Metabolism	-	GO:0048037//cofactor binding;GO:0005488//binding	-
	miR157-y	Unigene0073920	-	2184	4.5	4	0.006	1	0.5	PREDICTED: myb-like protein X [Nelumbo nucifera]	-	-	-	-
	miR157-y	Unigene0066406	-	210	4.5	2	0.006	5	2.5	E3 ubiquitin-protein ligase bre1-like isoform X2 [Asparagus officinalis]	-	-	-	-
	miR157-y	Unigene0011065	-	424	4	3	0.028	2	2	--	-	-	-	-
	miR157-y	Unigene0082737	ABCC2	2625	4.5	4	0.006	1	1	PREDICTED: ABC transporter C family member 2-like [Nelumbo nucifera]	-	GO:0044425//membrane part;GO:0016020//membrane;GO:0031224//intrinsic component of membrane	GO:0003824//catalytic activity;GO:0017111//nucleoside-triphosphatase activity;GO:0097367//carbohydrate derivative binding;GO:0022857//transmembrane transporter activity;GO:0016818//hydrolase activity, acting on acid anhydrides, in phosphorus-containing anhydrides;GO:0032549//ribonucleoside binding;GO:0015399//primary active transmembrane transporter activity;GO:0032550//purine ribonucleoside bind…	GO:0044699//single-organism process;GO:0009987//cellular process;GO:0044763//single-organism cellular process;GO:0051179//localization;GO:0051234//establishment of localization
	miR157-y	Unigene0039558	RPB2	1855	4.5	2	0.006	7	3.5	PREDICTED: DNA-directed RNA polymerase II subunit RPB2 [Nelumbo nucifera]	ko01100//Metabolic pathways//Global and Overview//Metabolism;ko00230//Purine metabolism//Nucleotide metabolism//Metabolism;ko00240//Pyrimidine metabolism//Nucleotide metabolism//Metabolism;ko03020//RNA polymerase//Transcription//Genetic Information Processing	-	GO:0097159//organic cyclic compound binding;GO:1901363//heterocyclic compound binding;GO:0016779//nucleotidyltransferase activity;GO:0016740//transferase activity;GO:0097367//carbohydrate derivative binding;GO:0034062//RNA polymerase activity;GO:0016772//transferase activity, transferring phosphorus-containing groups;GO:0005488//binding;GO:0036094//small molecule binding;GO:0003824//catalytic act…	GO:0071704//organic substance metabolic process;GO:0044260//cellular macromolecule metabolic process;GO:0009987//cellular process;GO:0043170//macromolecule metabolic process;GO:0009059//macromolecule biosynthetic process;GO:0008152//metabolic process;GO:1901576//organic substance biosynthetic process;GO:0034645//cellular macromolecule biosynthetic process;GO:0044249//cellular biosynthetic process…
	miR157-y	Unigene0075391	CER1	1976	4	2	0.006	18	18	PREDICTED: protein ECERIFERUM 1-like [Nelumbo nucifera]	ko01110//Biosynthesis of secondary metabolites//Global and Overview//Metabolism;ko00073//Cutin, suberine and wax biosynthesis//Lipid metabolism//Metabolism	-	-	-
	miR157-y	Unigene0079231	MIRO1	2434	4.5	2	0.006	3	1.5	PREDICTED: mitochondrial Rho GTPase 1-like isoform X1 [Phoenix dactylifera]	-	-	-	-
	miR157-y	Unigene0034485	HAT5	130	4	4	0.006	1	1	PREDICTED: homeobox-leucine zipper protein HAT5 [Nelumbo nucifera]	-	-	-	GO:0010467//gene expression;GO:0044249//cellular biosynthetic process;GO:0044237//cellular metabolic process;GO:0008152//metabolic process;GO:0034645//cellular macromolecule biosynthetic process;GO:0044260//cellular macromolecule metabolic process;GO:0009059//macromolecule biosynthetic process;GO:0071704//organic substance metabolic process;GO:1901576//organic substance biosynthetic process;GO:00…
	miR157-y	Unigene0087918	-	233	4.5	2	0.006	2	2	--	-	-	-	-
	miR157-y	Unigene0002645	SPBC23E6.02	736	4.5	0	0.02	56	28	PREDICTED: helicase-like transcription factor CHR28 [Juglans regia]	-	-	-	-
	miR157-y	Unigene0066152	EMB1674	726	4.5	1	0	2	2	PREDICTED: protein EMBRYO DEFECTIVE 1674-like isoform X1 [Prunus mume]	-	-	-	-
	miR157-y	Unigene0015444	SMT2	11	4.5	4	0.006	1	1	PREDICTED: 24-methylenesterol C-methyltransferase 2 [Nelumbo nucifera]	ko01110//Biosynthesis of secondary metabolites//Global and Overview//Metabolism;ko00100//Steroid biosynthesis//Lipid metabolism//Metabolism	-	GO:0016741//transferase activity, transferring one-carbon groups;GO:0008757//S-adenosylmethionine-dependent methyltransferase activity;GO:0016740//transferase activity;GO:0008168//methyltransferase activity;GO:0003824//catalytic activity	GO:0008152//metabolic process
	miR157-y	Unigene0050959	PHL1	620	4.5	2	0.006	3	1.5	PREDICTED: myb family transcription factor PHL7 isoform X1 [Vitis vinifera]	-	-	-	GO:0043170//macromolecule metabolic process;GO:0051179//localization;GO:0051641//cellular localization;GO:0044249//cellular biosynthetic process;GO:0051234//establishment of localization;GO:0044763//single-organism cellular process;GO:0071704//organic substance metabolic process;GO:0009058//biosynthetic process;GO:0044699//single-organism process;GO:0034645//cellular macromolecule biosynthetic pr…
	miR157-y	Unigene0086503	nip7	1187	4.5	4	0.006	1	1	PREDICTED: 60S ribosome subunit biogenesis protein NIP7 homolog isoform X1 [Amborella trichopoda]	-	-	-	-
	miR157-y	Unigene0042826	DCAF1	847	4	2	0.006	3	3	PREDICTED: DDB1- and CUL4-associated factor homolog 1 [Nelumbo nucifera]	-	-	-	-
	miR157-y	Unigene0108119	CSN1	711	4.5	4	0.006	1	1	PREDICTED: COP9 signalosome complex subunit 1 [Nelumbo nucifera]	-	-	-	-
	miR157-y	Unigene0084691	AGO2	525	4	4	0.006	1	1	PREDICTED: protein argonaute 2 [Nelumbo nucifera]	-	-	-	-
	miR157-y	Unigene0057758	PHOT1	920	4.5	4	0.006	1	1	phototropin, partial [Magnolia grandiflora]	-	-	-	-
	miR157-y	Unigene0061023	ACBP4	1072	4.5	4	0.006	1	1	PREDICTED: acyl-CoA-binding domain-containing protein 4-like isoform X2 [Nelumbo nucifera]	-	-	-	-
	miR157-y	Unigene0068229	-	576	4.5	2	0.006	4	1.33333	PREDICTED: uncharacterized protein LOC100266910 isoform X1 [Vitis vinifera]	-	-	-	-
	miR157-y	Unigene0055356	RABA1F	387	4.5	4	0.006	1	1	PREDICTED: ras-related protein RABA1f [Vitis vinifera]	ko04144//Endocytosis//Transport and catabolism//Cellular Processes	-	GO:0032550//purine ribonucleoside binding;GO:1901363//heterocyclic compound binding;GO:0005488//binding;GO:0097367//carbohydrate derivative binding;GO:0001883//purine nucleoside binding;GO:0001882//nucleoside binding;GO:0032549//ribonucleoside binding;GO:0036094//small molecule binding;GO:0097159//organic cyclic compound binding	GO:0035556//intracellular signal transduction;GO:0065007//biological regulation;GO:0007165//signal transduction;GO:0050794//regulation of cellular process;GO:0044699//single-organism process;GO:0044763//single-organism cellular process;GO:0007154//cell communication;GO:0033036//macromolecule localization;GO:0051179//localization;GO:0044700//single organism signaling;GO:0023052//signaling;GO:00517…
	miR157-y	Unigene0108202	-	2225	4.5	2	0.006	2	2	PREDICTED: arabinosyltransferase XEG113 isoform X1 [Nelumbo nucifera]	-	-	-	-
	miR157-y	Unigene0076139	CER1	1606	4	2	0.006	3	3	protein ECERIFERUM 1-like [Ananas comosus]	ko01110//Biosynthesis of secondary metabolites//Global and Overview//Metabolism;ko00073//Cutin, suberine and wax biosynthesis//Lipid metabolism//Metabolism	GO:0016020//membrane;GO:0031224//intrinsic component of membrane;GO:0044425//membrane part	GO:0003824//catalytic activity	GO:0032787//monocarboxylic acid metabolic process;GO:0006631//fatty acid metabolic process;GO:0009987//cellular process;GO:0044710//single-organism metabolic process;GO:0008152//metabolic process;GO:0044255//cellular lipid metabolic process;GO:0044699//single-organism process;GO:0043436//oxoacid metabolic process;GO:0006629//lipid metabolic process;GO:0044238//primary metabolic process;GO:0044237…
	miR157-y	Unigene0061561	CCC1	705	4	4	0.006	1	0.5	cation-chloride cotransporter 1 isoform X1 [Ananas comosus]	-	-	-	-
	miR157-y	Unigene0054257	PHIP	6558	3.5	4	0.006	1	1	PREDICTED: bromodomain and WD repeat-containing protein 1 [Nelumbo nucifera]	-	-	-	-
	miR157-y	Unigene0033858	WRKY11	165	4.5	2	0.006	2	2	PREDICTED: probable WRKY transcription factor 17 [Nelumbo nucifera]	-	-	GO:1901363//heterocyclic compound binding;GO:0003677//DNA binding;GO:0097159//organic cyclic compound binding;GO:0003676//nucleic acid binding;GO:0005488//binding	GO:0019222//regulation of metabolic process;GO:0065007//biological regulation;GO:0060255//regulation of macromolecule metabolic process;GO:0050789//regulation of biological process;GO:0010468//regulation of gene expression
	miR157-y	Unigene0079229	MIRO1	1555	4.5	2	0.006	3	1.5	PREDICTED: mitochondrial Rho GTPase 1 [Phoenix dactylifera]	-	-	-	-
	miR157-y	Unigene0010426	SUPT6H	1021	4.5	2	0.006	2	2	PREDICTED: transcription elongation factor SPT6 homolog [Nelumbo nucifera]	-	-	-	GO:0051252//regulation of RNA metabolic process;GO:0019219//regulation of nucleobase-containing compound metabolic process;GO:0031326//regulation of cellular biosynthetic process;GO:2001141//regulation of RNA biosynthetic process;GO:0019222//regulation of metabolic process;GO:0050794//regulation of cellular process;GO:0065007//biological regulation;GO:0009889//regulation of biosynthetic process;G…
	miR157-y	Unigene0113338	CBSX3	371	4	2	0.006	26	26	PREDICTED: CBS domain-containing protein CBSX3, mitochondrial-like [Nelumbo nucifera]	-	-	GO:1901265//nucleoside phosphate binding;GO:0043167//ion binding;GO:0046872//metal ion binding;GO:0005488//binding;GO:0046914//transition metal ion binding;GO:0000166//nucleotide binding;GO:0097159//organic cyclic compound binding;GO:0036094//small molecule binding;GO:0017076//purine nucleotide binding;GO:0043169//cation binding;GO:1901363//heterocyclic compound binding	GO:0016043//cellular component organization;GO:0008152//metabolic process;GO:0009987//cellular process;GO:0006082//organic acid metabolic process;GO:0006950//response to stress;GO:0071704//organic substance metabolic process;GO:0051179//localization;GO:0006810//transport;GO:0019725//cellular homeostasis;GO:0006970//response to osmotic stress;GO:0044281//small molecule metabolic process;GO:0044237…
	miR157-y	Unigene0032823	TRDMT1	202	3.5	4	0.006	1	1	PREDICTED: tRNA (cytosine(38)-C(5))-methyltransferase isoform X1 [Nelumbo nucifera]	-	-	-	-
miR167-x	miR167-x	Unigene0056491	-	313	4.5	4	0.004	1	0.5	--	-	-	-	-
	miR167-x	Unigene0082948	LIP5	1022	3	2	0.002	2	1	PREDICTED: protein HOMOLOG OF MAMMALIAN LYST-INTERACTING PROTEIN 5 [Elaeis guineensis]	ko04144//Endocytosis//Transport and catabolism//Cellular Processes	-	-	-
	miR167-x	Unigene0079798	LIG4	2620	3.5	4	0.004	1	1	PREDICTED: DNA ligase 4 isoform X1 [Elaeis guineensis]	ko03450//Non-homologous end-joining//Replication and repair//Genetic Information Processing	-	-	-
	miR167-x	Unigene0044971	-	1083	4.5	4	0.004	1	1	--	-	-	-	-
	miR167-x	Unigene0052119	exosc6	859	4	4	0.004	1	1	PREDICTED: exosome complex component RRP41-like isoform X1 [Nelumbo nucifera]	ko03018//RNA degradation//Folding, sorting and degradation//Genetic Information Processing	GO:0005623//cell;GO:0044424//intracellular part;GO:0005622//intracellular;GO:0044464//cell part	GO:0016787//hydrolase activity;GO:0016788//hydrolase activity, acting on ester bonds;GO:0004527//exonuclease activity;GO:0003824//catalytic activity;GO:0004518//nuclease activity	GO:0016569//covalent chromatin modification;GO:0071840//cellular component organization or biogenesis;GO:0048580//regulation of post-embryonic development;GO:0044710//single-organism metabolic process;GO:0043414//macromolecule methylation;GO:0016570//histone modification;GO:0090304//nucleic acid metabolic process;GO:0000003//reproduction;GO:0009987//cellular process;GO:0016568//chromatin modifica…
	miR167-x	Unigene0111776	Os08g0118900	601	4	2	0.002	5	5	PREDICTED: probable adenylate kinase 7, mitochondrial [Phoenix dactylifera]	ko01100//Metabolic pathways//Global and Overview//Metabolism;ko01110//Biosynthesis of secondary metabolites//Global and Overview//Metabolism;ko01130//Biosynthesis of antibiotics//Global and Overview//Metabolism;ko00230//Purine metabolism//Nucleotide metabolism//Metabolism	-	-	-
	miR167-x	Unigene0062071	PALD1	3501	4	2	0.002	2	2	PREDICTED: paladin isoform X2 [Nelumbo nucifera]	-	-	-	-
	miR167-x	Unigene0076706	RHM1	1069	4.5	2	0.002	2	2	PREDICTED: trifunctional UDP-glucose 4,6-dehydratase/UDP-4-keto-6-deoxy-D-glucose 3,5-epimerase/UDP-4-keto-L-rhamnose-reductase RHM1 [Nelumbo nucifera]	ko00520//Amino sugar and nucleotide sugar metabolism//Carbohydrate metabolism//Metabolism	-	GO:0016836//hydro-lyase activity;GO:0005488//binding;GO:0016829//lyase activity;GO:0003824//catalytic activity;GO:0048037//cofactor binding;GO:0016835//carbon-oxygen lyase activity	GO:0006139//nucleobase-containing compound metabolic process;GO:0006796//phosphate-containing compound metabolic process;GO:0009117//nucleotide metabolic process;GO:0019637//organophosphate metabolic process;GO:0044699//single-organism process;GO:0044710//single-organism metabolic process;GO:0006807//nitrogen compound metabolic process;GO:0044238//primary metabolic process;GO:0044237//cellular me…
	miR167-x	Unigene0068807	LUH	2866	4.5	4	0.004	1	1	PREDICTED: transcriptional corepressor LEUNIG_HOMOLOG-like [Nelumbo nucifera]	-	-	GO:0003824//catalytic activity;GO:0016740//transferase activity	-
	miR167-x	Unigene0048136	ELF6	1890	4.5	4	0.004	1	1	PREDICTED: probable lysine-specific demethylase ELF6 isoform X1 [Vitis vinifera]	-	-	-	-
	miR167-x	Unigene0081811	-	467	4.5	4	0.004	1	1	hypothetical protein VITISV_007701 [Vitis vinifera]	-	-	-	-
	miR167-x	Unigene0112964	At4g18820	4918	4	4	0.004	1	0.5	PREDICTED: protein STICHEL-like 3 isoform X1 [Nelumbo nucifera]	-	-	-	GO:0006725//cellular aromatic compound metabolic process;GO:0009987//cellular process;GO:0043170//macromolecule metabolic process;GO:0006807//nitrogen compound metabolic process;GO:0044238//primary metabolic process;GO:0044237//cellular metabolic process;GO:0008152//metabolic process;GO:0006139//nucleobase-containing compound metabolic process;GO:1901360//organic cyclic compound metabolic process…
	miR167-x	Unigene0010215	THO2	340	4.5	4	0.004	1	1	PREDICTED: THO complex subunit 2 isoform X1 [Nelumbo nucifera]	ko03040//Spliceosome//Transcription//Genetic Information Processing;ko03013//RNA transport//Translation//Genetic Information Processing	-	-	GO:0007165//signal transduction;GO:0050794//regulation of cellular process;GO:0050789//regulation of biological process;GO:0044700//single organism signaling;GO:0065007//biological regulation;GO:0009987//cellular process;GO:0007154//cell communication;GO:0044699//single-organism process;GO:0023052//signaling;GO:0035556//intracellular signal transduction;GO:0050896//response to stimulus;GO:0051716…
	miR167-x	Unigene0069798	nphp3	348	4.5	4	0.004	1	1	kinesin light chain 3 isoform X2 [Asparagus officinalis]	-	-	-	-
	miR167-x	Unigene0028697	Dnajb4	297	4	4	0.004	1	1	PREDICTED: dnaJ homolog subfamily B member 1-like [Phoenix dactylifera]	-	-	GO:0005515//protein binding;GO:0005488//binding	GO:0050896//response to stimulus
	miR167-x	Unigene0068581	At1g04910	2449	4.5	2	0.002	2	2	DUF246 domain-containing protein At1g04910 [Anthurium amnicola]	-	-	-	-
	miR167-x	Unigene0088317	OFP13	255	4	4	0.004	1	1	PREDICTED: transcription repressor OFP13 [Elaeis guineensis]	-	-	-	-
	miR167-x	Unigene0055926	-	784	4.5	4	0.004	1	1	PREDICTED: uncharacterized protein LOC100249192 [Vitis vinifera]	-	-	-	-
	miR167-x	Unigene0069711	-	17	4.5	4	0.004	1	1	--	-	-	-	-
	miR167-x	Unigene0071211	NPF8.3	965	4	2	0.002	8	8	PREDICTED: protein NRT1/ PTR FAMILY 8.3-like [Phoenix dactylifera]	-	GO:0016020//membrane;GO:0044425//membrane part;GO:0031224//intrinsic component of membrane	-	GO:0071705//nitrogen compound transport;GO:0042886//amide transport;GO:0071702//organic substance transport;GO:1902578//single-organism localization;GO:0044765//single-organism transport;GO:0051179//localization;GO:0015833//peptide transport;GO:0006810//transport;GO:0051234//establishment of localization;GO:0044699//single-organism process
	miR167-x	Unigene0031702	-	869	4.5	2	0.002	3	3	Phox/Bem1p [Corchorus capsularis]	-	-	-	-
	miR167-x	Unigene0054827	DDB_G0276461	1180	4.5	2	0.002	2	1	PREDICTED: probable serine/threonine-protein kinase DDB_G0280111 isoform X2 [Nelumbo nucifera]	-	-	-	-
	miR167-x	Unigene0019424	Zcchc10	848	4	4	0.004	1	1	PREDICTED: zinc finger CCHC domain-containing protein 10 [Phoenix dactylifera]	-	-	-	-
	miR167-x	Unigene0056492	MEKK1	2064	4.5	4	0.004	1	0.5	PREDICTED: mitogen-activated protein kinase kinase kinase 1 [Elaeis guineensis]	ko04626//Plant-pathogen interaction//Environmental adaptation//Organismal Systems	-	GO:0016740//transferase activity;GO:0004672//protein kinase activity;GO:0016301//kinase activity;GO:0016772//transferase activity, transferring phosphorus-containing groups;GO:0016773//phosphotransferase activity, alcohol group as acceptor;GO:0003824//catalytic activity	GO:0044237//cellular metabolic process;GO:0008152//metabolic process;GO:0009987//cellular process;GO:0006793//phosphorus metabolic process;GO:0016310//phosphorylation;GO:0006796//phosphate-containing compound metabolic process
	miR167-x	Unigene0054828	AAK1	1180	4.5	2	0.002	2	1	PREDICTED: probable serine/threonine-protein kinase DDB_G0280111 isoform X2 [Nelumbo nucifera]	-	-	GO:0016772//transferase activity, transferring phosphorus-containing groups;GO:0003824//catalytic activity;GO:0016740//transferase activity	-
	miR167-x	Unigene0025760	Marf1	2456	4.5	4	0.004	1	1	PREDICTED: meiosis arrest female protein 1 homolog [Prunus mume]	-	-	-	-
	miR167-x	Unigene0071060	At1g60070	1700	4.5	4	0.004	1	1	PREDICTED: AP-1 complex subunit gamma-2 [Nelumbo nucifera]	-	-	-	-
	miR167-x	Unigene0082946	LIP5	1833	3	3	0	2	1	PREDICTED: vacuolar protein sorting-associated protein VTA1 homolog [Sesamum indicum]	ko04144//Endocytosis//Transport and catabolism//Cellular Processes	-	-	GO:0051234//establishment of localization;GO:0051179//localization;GO:0006810//transport
	miR167-x	Unigene0062948	rpsA	487	4.5	4	0.004	1	1	30S ribosomal protein S1 [Anthurium amnicola]	-	-	-	GO:1901362//organic cyclic compound biosynthetic process;GO:0046483//heterocycle metabolic process;GO:0044711//single-organism biosynthetic process;GO:0006996//organelle organization;GO:0019752//carboxylic acid metabolic process;GO:0044255//cellular lipid metabolic process;GO:1901564//organonitrogen compound metabolic process;GO:0044238//primary metabolic process;GO:0006807//nitrogen compound met…
	miR167-x	Unigene0112965	At4g18820	5952	4	4	0.004	1	0.5	PREDICTED: protein STICHEL-like 3 isoform X1 [Nelumbo nucifera]	-	-	-	GO:0071704//organic substance metabolic process;GO:0006725//cellular aromatic compound metabolic process;GO:0008152//metabolic process;GO:0044238//primary metabolic process;GO:0090304//nucleic acid metabolic process;GO:0006139//nucleobase-containing compound metabolic process;GO:0006807//nitrogen compound metabolic process;GO:0034641//cellular nitrogen compound metabolic process;GO:0044237//cellu…
miR167-y	miR167-y	Unigene0058267	MYB4	160	4.5	4	0.004	1	1	PREDICTED: transcription factor MYB3-like [Nelumbo nucifera]	-	GO:0043229//intracellular organelle;GO:0005623//cell;GO:0043231//intracellular membrane-bounded organelle;GO:0044424//intracellular part;GO:0043226//organelle;GO:0043227//membrane-bounded organelle;GO:0044464//cell part;GO:0005622//intracellular	GO:0005488//binding;GO:0001071//nucleic acid binding transcription factor activity;GO:0003676//nucleic acid binding;GO:1901363//heterocyclic compound binding;GO:0097159//organic cyclic compound binding	GO:0001101//response to acid chemical;GO:0065007//biological regulation;GO:0048580//regulation of post-embryonic development;GO:2000026//regulation of multicellular organismal development;GO:0010468//regulation of gene expression;GO:0007275//multicellular organism development;GO:0044702//single organism reproductive process;GO:0048856//anatomical structure development;GO:0009791//post-embryonic d…
	miR167-y	Unigene0056489	TSS	1507	3.5	4	0.004	1	1	PREDICTED: protein TSS [Vitis vinifera]	-	-	-	-
	miR167-y	Unigene0026113	-	502	2.5	4	0.004	1	1	Bifunctional methyltransferase, partial [Anthurium amnicola]	-	GO:0044434//chloroplast part;GO:0043229//intracellular organelle;GO:0044444//cytoplasmic part;GO:0005622//intracellular;GO:0009536//plastid;GO:0031967//organelle envelope;GO:0005623//cell;GO:0044424//intracellular part;GO:0009507//chloroplast;GO:0043231//intracellular membrane-bounded organelle;GO:0031975//envelope;GO:0043226//organelle;GO:0044446//intracellular organelle part;GO:0044435//plastid…	-	-
	miR167-y	Unigene0085630	ACC1	7697	4.5	4	0.004	1	1	PREDICTED: acetyl-CoA carboxylase 1-like [Nelumbo nucifera]	ko01100//Metabolic pathways//Global and Overview//Metabolism;ko01110//Biosynthesis of secondary metabolites//Global and Overview//Metabolism;ko00620//Pyruvate metabolism//Carbohydrate metabolism//Metabolism;ko01212//Fatty acid metabolism//Global and Overview//Metabolism;ko00061//Fatty acid biosynthesis//Lipid metabolism//Metabolism;ko00640//Propanoate metabolism//Carbohydrate metabolism//Metaboli…	-	GO:0016885//ligase activity, forming carbon-carbon bonds;GO:0016421//CoA carboxylase activity;GO:0043169//cation binding;GO:0001883//purine nucleoside binding;GO:0005488//binding;GO:1901363//heterocyclic compound binding;GO:0097159//organic cyclic compound binding;GO:0032549//ribonucleoside binding;GO:0001882//nucleoside binding;GO:0032550//purine ribonucleoside binding;GO:0097367//carbohydrate d…	GO:0043436//oxoacid metabolic process;GO:0044255//cellular lipid metabolic process;GO:0006082//organic acid metabolic process;GO:0044281//small molecule metabolic process;GO:0044238//primary metabolic process;GO:0019752//carboxylic acid metabolic process;GO:0032787//monocarboxylic acid metabolic process;GO:0006629//lipid metabolic process;GO:0044699//single-organism process;GO:0006631//fatty acid…
	miR167-y	Unigene0035842	-	639	4.5	4	0.004	1	0.5	PREDICTED: serine/threonine-protein kinase HT1-like [Juglans regia]	-	-	-	-
	miR167-y	Unigene0037500	WRKY4	711	4.5	2	0.006	5	2.5	PREDICTED: probable WRKY transcription factor 4 isoform X1 [Phoenix dactylifera]	-	-	-	-
	miR167-y	Unigene0051576	NFS2	218	3.5	2	0.006	2	1	PREDICTED: cysteine desulfurase 1, chloroplastic isoform X2 [Vigna angularis]	ko01100//Metabolic pathways//Global and Overview//Metabolism;ko00450//Selenocompound metabolism//Metabolism of other amino acids//Metabolism	-	GO:0016829//lyase activity;GO:0003824//catalytic activity;GO:0016740//transferase activity;GO:0005488//binding;GO:0043167//ion binding;GO:0043168//anion binding;GO:0016782//transferase activity, transferring sulfur-containing groups;GO:0016783//sulfurtransferase activity;GO:0016846//carbon-sulfur lyase activity	GO:0043436//oxoacid metabolic process;GO:0006807//nitrogen compound metabolic process;GO:0044699//single-organism process;GO:0000096//sulfur amino acid metabolic process;GO:1901564//organonitrogen compound metabolic process;GO:0044237//cellular metabolic process;GO:0008152//metabolic process;GO:0019752//carboxylic acid metabolic process;GO:0044238//primary metabolic process;GO:0044763//single-org…
	miR167-y	Unigene0008517	TIM44-2	1099	4	2	0	3	3	PREDICTED: mitochondrial import inner membrane translocase subunit TIM44-2 [Nelumbo nucifera]	-	-	-	-
	miR167-y	Unigene0057083	SIR1	690	4	2	0.006	3	3	PREDICTED: sulfite reductase [ferredoxin], chloroplastic-like [Nelumbo nucifera]	ko01100//Metabolic pathways//Global and Overview//Metabolism;ko01120//Microbial metabolism in diverse environments//Global and Overview//Metabolism;ko00920//Sulfur metabolism//Energy metabolism//Metabolism	-	GO:0016667//oxidoreductase activity, acting on a sulfur group of donors;GO:0016673//oxidoreductase activity, acting on a sulfur group of donors, iron-sulfur protein as acceptor;GO:1901363//heterocyclic compound binding;GO:0016491//oxidoreductase activity;GO:0005488//binding;GO:0051540//metal cluster binding;GO:0097159//organic cyclic compound binding;GO:0051536//iron-sulfur cluster binding;GO:000…	GO:0044710//single-organism metabolic process;GO:0044699//single-organism process;GO:0008152//metabolic process
	miR167-y	Unigene0010190	FER	3845	4.5	4	0	1	1	PREDICTED: receptor-like protein kinase FERONIA [Nelumbo nucifera]	-	-	GO:0016772//transferase activity, transferring phosphorus-containing groups;GO:0016301//kinase activity;GO:0016740//transferase activity;GO:0003824//catalytic activity	GO:0006793//phosphorus metabolic process;GO:0044237//cellular metabolic process;GO:0006796//phosphate-containing compound metabolic process;GO:0009987//cellular process;GO:0008152//metabolic process
	miR167-y	Unigene0059058	GAPC	315	4	3	0.004	8	8	glyceraldehyde 3-phosphate dehydrogenase [Magnolia liliiflora]	ko01100//Metabolic pathways//Global and Overview//Metabolism;ko01110//Biosynthesis of secondary metabolites//Global and Overview//Metabolism;ko01130//Biosynthesis of antibiotics//Global and Overview//Metabolism;ko01120//Microbial metabolism in diverse environments//Global and Overview//Metabolism;ko01200//Carbon metabolism//Global and Overview//Metabolism;ko01230//Biosynthesis of amino acids//Glo…	-	-	-
	miR167-y	Unigene0056863	PRP19	88	4.5	4	0.004	1	0.5	PREDICTED: pre-mRNA-processing factor 19-like [Nelumbo nucifera]	ko03040//Spliceosome//Transcription//Genetic Information Processing;ko04120//Ubiquitin mediated proteolysis//Folding, sorting and degradation//Genetic Information Processing	-	-	-
	miR167-y	Unigene0048660	OVA9	491	4.5	2	0.006	4	4	PREDICTED: glutamine--tRNA ligase [Nelumbo nucifera]	ko01100//Metabolic pathways//Global and Overview//Metabolism;ko00970//Aminoacyl-tRNA biosynthesis//Translation//Genetic Information Processing	GO:0005623//cell;GO:0044424//intracellular part;GO:0005622//intracellular;GO:0044464//cell part	GO:0016874//ligase activity;GO:0004812//aminoacyl-tRNA ligase activity;GO:0016875//ligase activity, forming carbon-oxygen bonds;GO:0003824//catalytic activity;GO:0097367//carbohydrate derivative binding;GO:0097159//organic cyclic compound binding;GO:0032550//purine ribonucleoside binding;GO:0001883//purine nucleoside binding;GO:0005488//binding;GO:0016876//ligase activity, forming aminoacyl-tRNA …	GO:0019752//carboxylic acid metabolic process;GO:0043039//tRNA aminoacylation;GO:0044710//single-organism metabolic process;GO:0006518//peptide metabolic process;GO:0006399//tRNA metabolic process;GO:0006082//organic acid metabolic process;GO:0043038//amino acid activation;GO:0044238//primary metabolic process;GO:0009987//cellular process;GO:1901564//organonitrogen compound metabolic process;GO:0…
	miR167-y	Unigene0015099	CXE17	651	4.5	4	0	1	1	PREDICTED: probable carboxylesterase 15 [Nelumbo nucifera]	-	-	GO:0003824//catalytic activity	-
	miR167-y	Unigene0056862	PRP19	1107	4.5	4	0.004	1	0.5	PREDICTED: pre-mRNA-processing factor 19-like [Nelumbo nucifera]	ko03040//Spliceosome//Transcription//Genetic Information Processing;ko04120//Ubiquitin mediated proteolysis//Folding, sorting and degradation//Genetic Information Processing	-	GO:0003824//catalytic activity	GO:0044267//cellular protein metabolic process;GO:0006464//cellular protein modification process;GO:0009987//cellular process;GO:0043170//macromolecule metabolic process;GO:0019538//protein metabolic process;GO:0032446//protein modification by small protein conjugation;GO:0044237//cellular metabolic process;GO:0070647//protein modification by small protein conjugation or removal;GO:0008152//metab…
	miR167-y	Unigene0060136	VIII-1	2623	4.5	4	0.004	1	1	PREDICTED: myosin-1 [Amborella trichopoda]	-	-	-	-
	miR167-y	Unigene0004428	At5g64460	907	4	4	0	1	1	PREDICTED: phosphoglycerate mutase-like protein 1 isoform X3 [Phoenix dactylifera]	-	-	-	-
	miR167-y	Unigene0070079	UBC22	358	4	4	0.004	1	1	PREDICTED: ubiquitin-conjugating enzyme E2 22 isoform X1 [Nelumbo nucifera]	ko04120//Ubiquitin mediated proteolysis//Folding, sorting and degradation//Genetic Information Processing	-	-	-
	miR167-y	Unigene0035841	HT1	1906	4.5	4	0.004	1	0.5	PREDICTED: serine/threonine-protein kinase HT1-like isoform X2 [Nelumbo nucifera]	-	-	-	-
	miR167-y	Unigene0058902	ABI5	681	4	4	0.004	1	1	PREDICTED: ABSCISIC ACID-INSENSITIVE 5-like protein 2 isoform X3 [Malus domestica]	ko04075//Plant hormone signal transduction//Signal transduction//Environmental Information Processing	-	-	-
	miR167-y	Unigene0055820	-	684	4.5	4	0.004	1	1	Nuclear factor related to kappa-B-binding protein [Anthurium amnicola]	-	-	-	-
	miR167-y	Unigene0085035	-	1107	4	4	0.004	1	0.5	--	-	-	-	-
	miR167-y	Unigene0086918	At5g01460	351	4	2	0.006	3	1.5	PREDICTED: LIMR family protein At5g01460 [Citrus sinensis]	-	GO:0016020//membrane;GO:0044425//membrane part;GO:0031224//intrinsic component of membrane	-	-
	miR167-y	Unigene0027030	VPS13A	3116	4.5	2	0.006	3	3	PREDICTED: uncharacterized protein LOC105035160 isoform X1 [Elaeis guineensis]	-	-	-	-
	miR167-y	Unigene0074751	Os07g0555200	922	3.5	4	0.004	1	1	MIF4G-like, type 3 [Corchorus olitorius]	ko03013//RNA transport//Translation//Genetic Information Processing	-	GO:1901363//heterocyclic compound binding;GO:0097159//organic cyclic compound binding;GO:0003676//nucleic acid binding;GO:0005488//binding	GO:0044267//cellular protein metabolic process;GO:0009059//macromolecule biosynthetic process;GO:0010467//gene expression;GO:0034645//cellular macromolecule biosynthetic process;GO:0019538//protein metabolic process;GO:1901566//organonitrogen compound biosynthetic process;GO:0071704//organic substance metabolic process;GO:0044271//cellular nitrogen compound biosynthetic process;GO:0006518//peptid…
	miR167-y	Unigene0065200	-	262	4.5	3	0.004	3	3	DUF1677 domain-containing protein [Cephalotus follicularis]	-	-	-	-
	miR167-y	Unigene0059730	tbc1d5A	2418	4.5	4	0.004	1	1	PREDICTED: TBC1 domain family member 5 homolog B-like [Nelumbo nucifera]	-	-	-	-
	miR167-y	Unigene0051575	NFS2	1165	3.5	2	0.006	2	1	PREDICTED: cysteine desulfurase 1, chloroplastic [Nelumbo nucifera]	ko01100//Metabolic pathways//Global and Overview//Metabolism;ko00450//Selenocompound metabolism//Metabolism of other amino acids//Metabolism	GO:0009536//plastid;GO:0044444//cytoplasmic part;GO:0043227//membrane-bounded organelle;GO:0005623//cell;GO:0043231//intracellular membrane-bounded organelle;GO:0043226//organelle;GO:0005737//cytoplasm;GO:0005622//intracellular;GO:0043229//intracellular organelle;GO:0044424//intracellular part;GO:0044464//cell part	GO:0016783//sulfurtransferase activity;GO:0016829//lyase activity;GO:0016740//transferase activity;GO:0016846//carbon-sulfur lyase activity;GO:0043167//ion binding;GO:0016782//transferase activity, transferring sulfur-containing groups;GO:0005488//binding;GO:0043168//anion binding;GO:0003824//catalytic activity	GO:0006790//sulfur compound metabolic process;GO:0055080//cation homeostasis;GO:1901566//organonitrogen compound biosynthetic process;GO:0044699//single-organism process;GO:0006082//organic acid metabolic process;GO:0009058//biosynthetic process;GO:0000096//sulfur amino acid metabolic process;GO:0016043//cellular component organization;GO:1901576//organic substance biosynthetic process;GO:0044237…
	miR167-y	Unigene0021922	SHM6	1486	4.5	4	0.004	1	1	PREDICTED: serine hydroxymethyltransferase 7 [Nelumbo nucifera]	ko01100//Metabolic pathways//Global and Overview//Metabolism;ko01110//Biosynthesis of secondary metabolites//Global and Overview//Metabolism;ko01130//Biosynthesis of antibiotics//Global and Overview//Metabolism;ko01120//Microbial metabolism in diverse environments//Global and Overview//Metabolism;ko01200//Carbon metabolism//Global and Overview//Metabolism;ko01230//Biosynthesis of amino acids//Glo…	-	GO:0016740//transferase activity;GO:0043167//ion binding;GO:0043168//anion binding;GO:0005488//binding;GO:0016741//transferase activity, transferring one-carbon groups;GO:0003824//catalytic activity;GO:0016742//hydroxymethyl-, formyl- and related transferase activity	GO:0044710//single-organism metabolic process;GO:0044763//single-organism cellular process;GO:0043436//oxoacid metabolic process;GO:0044237//cellular metabolic process;GO:1901605//alpha-amino acid metabolic process;GO:0006520//cellular amino acid metabolic process;GO:0071704//organic substance metabolic process;GO:0006730//one-carbon metabolic process;GO:0044281//small molecule metabolic process;…
	miR167-y	Unigene0081395	At1g43190	1897	4	2	0.006	2	2	PREDICTED: polypyrimidine tract-binding protein homolog 3-like isoform X2 [Nelumbo nucifera]	-	-	-	-
	miR167-y	Unigene0101037	TIM10	298	4.5	4	0.004	1	1	Mitochondrial import inner membrane translocase subunit TIM10, partial [Ananas comosus]	-	-	-	-
	miR167-y	Unigene0010790	-	2286	4	4	0	1	0.5	PREDICTED: uncharacterized protein LOC104604753 isoform X1 [Nelumbo nucifera]	-	-	-	-
	miR167-y	Unigene0049605	RPS29	166	4.5	4	0.004	1	1	40S ribosomal protein S29, partial [Dichanthelium oligosanthes]	ko03010//Ribosome//Translation//Genetic Information Processing	-	-	-
	miR167-y	Unigene0037499	WRKY4	247	4.5	2	0.006	5	2.5	PREDICTED: probable WRKY transcription factor 4 isoform X1 [Phoenix dactylifera]	-	-	-	-
	miR167-y	Unigene0086914	At5g01460	351	4	2	0.006	3	1.5	PREDICTED: LIMR family protein At5g01460-like [Camelina sativa]	-	GO:0044425//membrane part;GO:0016020//membrane;GO:0031224//intrinsic component of membrane	-	-
miR2092-x	miR2092-x	Unigene0032082	GA15091	561	4	2	0.01	7	7	PREDICTED: protein GDAP2 homolog [Phoenix dactylifera]	-	-	-	-
	miR2092-x	Unigene0062176	XBAT33	1857	4.5	2	0.01	2	2	PREDICTED: E3 ubiquitin-protein ligase XBAT33 isoform X1 [Vitis vinifera]	-	-	GO:0043167//ion binding;GO:0005488//binding;GO:0003824//catalytic activity;GO:0019787//ubiquitin-like protein transferase activity;GO:0016740//transferase activity;GO:0043169//cation binding	GO:0036211//protein modification process;GO:0044267//cellular protein metabolic process;GO:0019538//protein metabolic process;GO:0032446//protein modification by small protein conjugation;GO:0044238//primary metabolic process;GO:0043170//macromolecule metabolic process;GO:0044237//cellular metabolic process;GO:0044260//cellular macromolecule metabolic process;GO:0006464//cellular protein modifica…
	miR2092-x	Unigene0040237	LAG2	258	4	4	0.002	1	1	PREDICTED: LAG1 longevity assurance homolog 2-like [Nelumbo nucifera]	ko01100//Metabolic pathways//Global and Overview//Metabolism;ko00600//Sphingolipid metabolism//Lipid metabolism//Metabolism	GO:0044424//intracellular part;GO:0044425//membrane part;GO:0043226//organelle;GO:0043227//membrane-bounded organelle;GO:0005623//cell;GO:0031224//intrinsic component of membrane;GO:0043229//intracellular organelle;GO:0031090//organelle membrane;GO:0016020//membrane;GO:0044464//cell part;GO:0005622//intracellular;GO:0044422//organelle part;GO:0043231//intracellular membrane-bounded organelle	GO:0016410//N-acyltransferase activity;GO:0016746//transferase activity, transferring acyl groups;GO:0016740//transferase activity;GO:0016747//transferase activity, transferring acyl groups other than amino-acyl groups;GO:0003824//catalytic activity	GO:0006629//lipid metabolic process;GO:0001676//long-chain fatty acid metabolic process;GO:0044281//small molecule metabolic process;GO:0044763//single-organism cellular process;GO:0044699//single-organism process;GO:0009987//cellular process;GO:0044249//cellular biosynthetic process;GO:0006807//nitrogen compound metabolic process;GO:0044711//single-organism biosynthetic process;GO:0006643//membr…
	miR2092-x	Unigene0012924	AP2M	476	4.5	2	0.01	2	1	PREDICTED: AP-2 complex subunit mu [Amborella trichopoda]	ko04144//Endocytosis//Transport and catabolism//Cellular Processes	GO:0044444//cytoplasmic part;GO:0005622//intracellular;GO:0030117//membrane coat;GO:0032991//macromolecular complex;GO:0005737//cytoplasm;GO:0005623//cell;GO:0016020//membrane;GO:0044424//intracellular part;GO:0043234//protein complex;GO:0044464//cell part;GO:0048475//coated membrane;GO:0044425//membrane part;GO:0098796//membrane protein complex;GO:0030119//AP-type membrane coat adaptor complex	GO:0005488//binding;GO:0043167//ion binding;GO:0043168//anion binding	GO:0006810//transport;GO:0008104//protein localization;GO:0008152//metabolic process;GO:0071702//organic substance transport;GO:0051179//localization;GO:0015031//protein transport;GO:0033036//macromolecule localization;GO:0051234//establishment of localization;GO:0045184//establishment of protein localization
	miR2092-x	Unigene0080102	GSPO-B1	462	4	3	0.022	3	3	trypsin protein inhibitor 3 [Populus trichocarpa]	-	-	-	-
	miR2092-x	Unigene0059020	RPS15AA	188	4.5	2	0.01	35	17.5	PREDICTED: 40S ribosomal protein S15a-1 [Arachis duranensis]	ko03010//Ribosome//Translation//Genetic Information Processing	-	-	-
	miR2092-x	Unigene0061442	VTC5	1735	3.5	2	0.01	3	3	GDP-L-galactose phosphorylase [Actinidia eriantha]	ko01100//Metabolic pathways//Global and Overview//Metabolism;ko01110//Biosynthesis of secondary metabolites//Global and Overview//Metabolism;ko00053//Ascorbate and aldarate metabolism//Carbohydrate metabolism//Metabolism	-	GO:0016758//transferase activity, transferring hexosyl groups;GO:0016772//transferase activity, transferring phosphorus-containing groups;GO:0016757//transferase activity, transferring glycosyl groups;GO:0016740//transferase activity;GO:0003824//catalytic activity;GO:0004645//phosphorylase activity	-
	miR2092-x	Unigene0065520	BAM9	2014	4	3	0.022	2	2	PREDICTED: inactive beta-amylase 9-like [Nelumbo nucifera]	-	-	GO:0003824//catalytic activity;GO:0016787//hydrolase activity	-
	miR2092-x	Unigene0024618	At2g44510	1755	4.5	2	0.01	3	1.5	PREDICTED: protein BCCIP homolog isoform X1 [Nelumbo nucifera]	-	-	-	-
	miR2092-x	Unigene0112214	-	596	4.5	2	0.01	2	1	PREDICTED: translation initiation factor IF-2 isoform X1 [Cucumis melo]	-	-	-	-
	miR2092-x	Unigene0048584	TPLATE	795	3.5	2	0.01	3	3	PREDICTED: protein TPLATE-like [Nelumbo nucifera]	-	GO:0005737//cytoplasm;GO:0005911//cell-cell junction;GO:0043228//non-membrane-bounded organelle;GO:0005622//intracellular;GO:0043229//intracellular organelle;GO:0044444//cytoplasmic part;GO:0044424//intracellular part;GO:0016020//membrane;GO:0043232//intracellular non-membrane-bounded organelle;GO:0044464//cell part;GO:0043226//organelle;GO:0030054//cell junction;GO:0005623//cell	-	GO:0030243//cellulose metabolic process;GO:0043170//macromolecule metabolic process;GO:0051179//localization;GO:0044042//glucan metabolic process;GO:0007275//multicellular organism development;GO:0071704//organic substance metabolic process;GO:0006073//cellular glucan metabolic process;GO:0006810//transport;GO:0044262//cellular carbohydrate metabolic process;GO:0044707//single-multicellular organ…
	miR2092-x	Unigene0080841	EMS1	650	3.5	2	0.01	2	2	PREDICTED: phytosulfokine receptor 2-like [Nelumbo nucifera]	-	-	GO:0016772//transferase activity, transferring phosphorus-containing groups;GO:0003824//catalytic activity;GO:0004672//protein kinase activity;GO:0016301//kinase activity;GO:0016740//transferase activity;GO:0016773//phosphotransferase activity, alcohol group as acceptor	GO:0044267//cellular protein metabolic process;GO:0043170//macromolecule metabolic process;GO:0016310//phosphorylation;GO:0006464//cellular protein modification process;GO:0006796//phosphate-containing compound metabolic process;GO:0036211//protein modification process;GO:0044237//cellular metabolic process;GO:0044260//cellular macromolecule metabolic process;GO:0019538//protein metabolic process…
	miR2092-x	Unigene0059076	-	1124	4	2	0.01	2	2	PREDICTED: probable DNA-directed RNA polymerase I subunit RPA43 isoform X1 [Phoenix dactylifera]	-	-	-	-
	miR2092-x	Unigene0063780	SBT1.7	689	4	2	0.01	2	2	PREDICTED: subtilisin-like protease SBT1.7 [Jatropha curcas]	-	-	GO:0016787//hydrolase activity;GO:0003824//catalytic activity;GO:0070011//peptidase activity, acting on L-amino acid peptides;GO:0008233//peptidase activity	GO:0071704//organic substance metabolic process;GO:0019538//protein metabolic process;GO:0043170//macromolecule metabolic process;GO:0008152//metabolic process;GO:0044238//primary metabolic process
	miR2092-x	Unigene0059379	DDB_G0274487	2123	4.5	2	0.01	2	1	Choline_transpo domain-containing protein [Cephalotus follicularis]	-	-	-	-
	miR2092-x	Unigene0054762	TMN8	1671	4	4	0.002	1	1	PREDICTED: transmembrane 9 superfamily member 8-like [Nelumbo nucifera]	-	GO:0016020//membrane;GO:0044425//membrane part;GO:0031224//intrinsic component of membrane	-	GO:0009059//macromolecule biosynthetic process;GO:0006497//protein lipidation;GO:0044238//primary metabolic process;GO:0036211//protein modification process;GO:0008152//metabolic process;GO:0044237//cellular metabolic process;GO:1901576//organic substance biosynthetic process;GO:0042158//lipoprotein biosynthetic process;GO:0044267//cellular protein metabolic process;GO:0071704//organic substance …
	miR2092-x	Unigene0053033	-	1085	4.5	4	0.002	1	0.5	PREDICTED: probable inactive ATP-dependent zinc metalloprotease FTSHI 1, chloroplastic [Nelumbo nucifera]	-	-	GO:0016787//hydrolase activity;GO:0003824//catalytic activity	-
	miR2092-x	Unigene0076440	NRPB6B	994	4.5	2	0.01	6	6	DNA-directed RNA polymerase [Zostera marina]	ko01100//Metabolic pathways//Global and Overview//Metabolism;ko00230//Purine metabolism//Nucleotide metabolism//Metabolism;ko00240//Pyrimidine metabolism//Nucleotide metabolism//Metabolism;ko03020//RNA polymerase//Transcription//Genetic Information Processing	-	-	-
	miR2092-x	Unigene0076843	-	437	4	4	0.002	1	1	PREDICTED: uncharacterized transmembrane protein DDB_G0285607-like [Nelumbo nucifera]	-	-	-	-
	miR2092-x	Unigene0080655	-	509	4.5	2	0.01	3	3	--	-	-	-	-
	miR2092-x	Unigene0021919	-	746	4	4	0.002	1	1	PREDICTED: transmembrane protein 33 homolog [Juglans regia]	-	GO:0044425//membrane part;GO:0005911//cell-cell junction;GO:0016020//membrane;GO:0043231//intracellular membrane-bounded organelle;GO:0031224//intrinsic component of membrane;GO:0044464//cell part;GO:0043229//intracellular organelle;GO:0005623//cell;GO:0005622//intracellular;GO:0030054//cell junction;GO:0043227//membrane-bounded organelle;GO:0043226//organelle;GO:0044424//intracellular part	-	-
	miR2092-x	Unigene0088549	TYW1	1266	4.5	4	0.002	1	1	PREDICTED: S-adenosyl-L-methionine-dependent tRNA 4-demethylwyosine synthase [Nelumbo nucifera]	-	-	-	GO:0008152//metabolic process
	miR2092-x	Unigene0002036	CLS	158	4	4	0.002	1	1	PREDICTED: cardiolipin synthase (CMP-forming), mitochondrial [Nelumbo nucifera]	ko01100//Metabolic pathways//Global and Overview//Metabolism;ko00564//Glycerophospholipid metabolism//Lipid metabolism//Metabolism	GO:0005623//cell;GO:0044464//cell part;GO:0043226//organelle;GO:0044424//intracellular part;GO:0005622//intracellular;GO:0043229//intracellular organelle;GO:0043231//intracellular membrane-bounded organelle;GO:0043227//membrane-bounded organelle	GO:0046872//metal ion binding;GO:0003824//catalytic activity;GO:0030572//phosphatidyltransferase activity;GO:0043169//cation binding;GO:0005488//binding;GO:0016780//phosphotransferase activity, for other substituted phosphate groups;GO:0016740//transferase activity;GO:0046914//transition metal ion binding;GO:0043167//ion binding;GO:0016772//transferase activity, transferring phosphorus-containing…	GO:0019932//second-messenger-mediated signaling;GO:0023052//signaling;GO:0065007//biological regulation;GO:0044700//single organism signaling;GO:0044699//single-organism process;GO:0044763//single-organism cellular process;GO:0050896//response to stimulus;GO:0050794//regulation of cellular process;GO:0051716//cellular response to stimulus;GO:0007154//cell communication;GO:0009987//cellular proces…
	miR2092-x	Unigene0012363	MUR1	246	4	2	0.01	2	2	PREDICTED: GDP-mannose 4,6 dehydratase 1 [Vitis vinifera]	ko01100//Metabolic pathways//Global and Overview//Metabolism;ko00520//Amino sugar and nucleotide sugar metabolism//Carbohydrate metabolism//Metabolism;ko00051//Fructose and mannose metabolism//Carbohydrate metabolism//Metabolism	-	GO:0048037//cofactor binding;GO:0016836//hydro-lyase activity;GO:0016829//lyase activity;GO:0016835//carbon-oxygen lyase activity;GO:0005488//binding;GO:0003824//catalytic activity	GO:0009225//nucleotide-sugar metabolic process;GO:0046483//heterocycle metabolic process;GO:0009987//cellular process;GO:0008152//metabolic process;GO:0006139//nucleobase-containing compound metabolic process;GO:0044237//cellular metabolic process;GO:0071704//organic substance metabolic process;GO:1901360//organic cyclic compound metabolic process;GO:0006725//cellular aromatic compound metabolic …
	miR2092-x	Unigene0048136	ELF6	3204	4.5	4	0.002	1	1	PREDICTED: probable lysine-specific demethylase ELF6 isoform X1 [Vitis vinifera]	-	-	-	-
	miR2092-x	Unigene0067297	HSP70-14	618	4	4	0.002	1	1	PREDICTED: heat shock 70 kDa protein 15-like [Nelumbo nucifera]	-	-	GO:0036094//small molecule binding;GO:0001882//nucleoside binding;GO:0032550//purine ribonucleoside binding;GO:0032549//ribonucleoside binding;GO:1901363//heterocyclic compound binding;GO:0097159//organic cyclic compound binding;GO:0005488//binding;GO:0001883//purine nucleoside binding;GO:0097367//carbohydrate derivative binding	-
	miR2092-x	Unigene0066892	CLASP	2383	4.5	4	0.002	1	1	PREDICTED: CLIP-associated protein-like [Nelumbo nucifera]	-	-	-	-
	miR2092-x	Unigene0074031	Os12g0104800	3178	4.5	4	0.002	1	1	PREDICTED: clathrin heavy chain 1 [Elaeis guineensis]	ko04144//Endocytosis//Transport and catabolism//Cellular Processes	GO:0005737//cytoplasm;GO:0031410//cytoplasmic vesicle;GO:0044425//membrane part;GO:0044433//cytoplasmic vesicle part;GO:0043229//intracellular organelle;GO:0044464//cell part;GO:0044422//organelle part;GO:0043234//protein complex;GO:0030662//coated vesicle membrane;GO:0030120//vesicle coat;GO:0043231//intracellular membrane-bounded organelle;GO:0016023//cytoplasmic, membrane-bounded vesicle;GO:00…	-	GO:0051179//localization;GO:0006810//transport;GO:0033036//macromolecule localization;GO:0015031//protein transport;GO:0071702//organic substance transport;GO:0008104//protein localization;GO:0051234//establishment of localization;GO:0045184//establishment of protein localization
	miR2092-x	Unigene0077567	MED26B	273	4.5	4	0.002	1	0.5	PREDICTED: probable mediator of RNA polymerase II transcription subunit 26b [Nelumbo nucifera]	-	-	-	-
	miR2092-x	Unigene0073376	-	697	4.5	4	0.002	1	1	Alpha-mannosidase 2 [Anthurium amnicola]	-	-	-	-
	miR2092-x	Unigene0061772	LNG1	479	4.5	4	0.002	1	0.5	PREDICTED: protein LONGIFOLIA 1-like [Nelumbo nucifera]	-	-	-	-
	miR2092-x	Unigene0026961	CDC73	914	4	2	0.01	3	3	PREDICTED: protein CDC73 homolog [Nelumbo nucifera]	-	-	-	GO:0044707//single-multicellular organism process;GO:0048856//anatomical structure development;GO:0032502//developmental process;GO:0048731//system development;GO:0007275//multicellular organism development;GO:0000003//reproduction;GO:0044699//single-organism process;GO:0044767//single-organism developmental process;GO:0061458//reproductive system development;GO:0048608//reproductive structure de…
	miR2092-x	Unigene0008318	CLPP3	253	4.5	4	0.002	1	1	PREDICTED: ATP-dependent Clp protease proteolytic subunit 3, chloroplastic-like [Phoenix dactylifera]	-	GO:0043231//intracellular membrane-bounded organelle;GO:0031975//envelope;GO:0043227//membrane-bounded organelle;GO:0031976//plastid thylakoid;GO:0009368//endopeptidase Clp complex;GO:0043226//organelle;GO:0009526//plastid envelope;GO:0032991//macromolecular complex;GO:0005622//intracellular;GO:0043229//intracellular organelle;GO:0009536//plastid;GO:0043234//protein complex;GO:0044422//organelle …	GO:0032550//purine ribonucleoside binding;GO:0001883//purine nucleoside binding;GO:0097159//organic cyclic compound binding;GO:0032549//ribonucleoside binding;GO:0016787//hydrolase activity;GO:0004175//endopeptidase activity;GO:0003824//catalytic activity;GO:0097367//carbohydrate derivative binding;GO:1901363//heterocyclic compound binding;GO:0005488//binding;GO:0070011//peptidase activity, actin…	GO:0071704//organic substance metabolic process;GO:0019538//protein metabolic process;GO:0044238//primary metabolic process;GO:0043170//macromolecule metabolic process;GO:0008152//metabolic process
	miR2092-x	Unigene0096216	LACS4	484	3.5	2	0.01	8	8	PREDICTED: long chain acyl-CoA synthetase 4-like isoform X2 [Nelumbo nucifera]	ko01100//Metabolic pathways//Global and Overview//Metabolism;ko04146//Peroxisome//Transport and catabolism//Cellular Processes;ko01212//Fatty acid metabolism//Global and Overview//Metabolism;ko00061//Fatty acid biosynthesis//Lipid metabolism//Metabolism;ko00071//Fatty acid degradation//Lipid metabolism//Metabolism	-	-	-
	miR2092-x	Unigene0022520	FAM210B	148	4	2	0.01	9	9	Protein FAM210B, partial [Anthurium amnicola]	-	GO:0043227//membrane-bounded organelle;GO:0005737//cytoplasm;GO:0009507//chloroplast;GO:0043231//intracellular membrane-bounded organelle;GO:0044424//intracellular part;GO:0043229//intracellular organelle;GO:0044464//cell part;GO:0044444//cytoplasmic part;GO:0009536//plastid;GO:0043226//organelle;GO:0005623//cell;GO:0005622//intracellular	-	GO:0044767//single-organism developmental process;GO:0009987//cellular process;GO:0032502//developmental process;GO:0044699//single-organism process
	miR2092-x	Unigene0060180	EPSIN1	173	3.5	2	0.01	2	2	PREDICTED: clathrin interactor EPSIN 1-like [Nelumbo nucifera]	ko04144//Endocytosis//Transport and catabolism//Cellular Processes	GO:0005622//intracellular;GO:0043231//intracellular membrane-bounded organelle;GO:0043226//organelle;GO:0005623//cell;GO:0043229//intracellular organelle;GO:0031410//cytoplasmic vesicle;GO:0043228//non-membrane-bounded organelle;GO:0044464//cell part;GO:0043227//membrane-bounded organelle;GO:0044444//cytoplasmic part;GO:0031982//vesicle;GO:0005737//cytoplasm;GO:0043232//intracellular non-membrane…	-	GO:0008104//protein localization;GO:0033036//macromolecule localization;GO:0045184//establishment of protein localization;GO:0006886//intracellular protein transport;GO:0034613//cellular protein localization;GO:0070727//cellular macromolecule localization;GO:0051179//localization;GO:0006810//transport;GO:0051649//establishment of localization in cell;GO:0051641//cellular localization;GO:0071702//…
	miR2092-x	Unigene0005674	SPBC1271.03c	1630	4.5	2	0.01	2	2	PREDICTED: MATH and LRR domain-containing protein PFE0570w-like [Ziziphus jujuba]	-	-	-	-
	miR2092-x	Unigene0061773	LNG1	2730	4.5	4	0.002	1	0.5	PREDICTED: protein LONGIFOLIA 1-like [Nelumbo nucifera]	-	-	-	-
	miR2092-x	Unigene0047291	efg1	385	4	2	0.01	2	1	PREDICTED: rRNA-processing protein EFG1 isoform X1 [Ricinus communis]	-	-	-	-
	miR2092-x	Unigene0014799	At1g32060	1268	3.5	4	0.002	1	1	PREDICTED: phosphoribulokinase, chloroplastic-like [Nelumbo nucifera]	ko01100//Metabolic pathways//Global and Overview//Metabolism;ko01120//Microbial metabolism in diverse environments//Global and Overview//Metabolism;ko01200//Carbon metabolism//Global and Overview//Metabolism;ko00710//Carbon fixation in photosynthetic organisms//Energy metabolism//Metabolism	GO:0009532//plastid stroma;GO:0043229//intracellular organelle;GO:0044424//intracellular part;GO:0044422//organelle part;GO:0005737//cytoplasm;GO:0005623//cell;GO:0031967//organelle envelope;GO:0009507//chloroplast;GO:0043226//organelle;GO:0044446//intracellular organelle part;GO:0043227//membrane-bounded organelle;GO:0044444//cytoplasmic part;GO:0005622//intracellular;GO:0044464//cell part;GO:00…	GO:0036094//small molecule binding;GO:1901363//heterocyclic compound binding;GO:0097367//carbohydrate derivative binding;GO:0005488//binding;GO:0016772//transferase activity, transferring phosphorus-containing groups;GO:0001882//nucleoside binding;GO:0016740//transferase activity;GO:0003824//catalytic activity;GO:0032550//purine ribonucleoside binding;GO:0001883//purine nucleoside binding;GO:0097…	GO:1901701//cellular response to oxygen-containing compound;GO:0006461//protein complex assembly;GO:0044710//single-organism metabolic process;GO:1901576//organic substance biosynthetic process;GO:0042221//response to chemical;GO:0031399//regulation of protein modification process;GO:0000096//sulfur amino acid metabolic process;GO:0006796//phosphate-containing compound metabolic process;GO:000975…
	miR2092-x	Unigene0010404	B3GALT6	1363	4	2	0.01	2	2	PREDICTED: beta-1,6-galactosyltransferase GALT31A [Nelumbo nucifera]	-	GO:0031090//organelle membrane;GO:0044425//membrane part;GO:0016020//membrane;GO:0043226//organelle;GO:0044422//organelle part;GO:0031224//intrinsic component of membrane;GO:0043227//membrane-bounded organelle	GO:0016758//transferase activity, transferring hexosyl groups;GO:0003824//catalytic activity;GO:0008378//galactosyltransferase activity;GO:0016740//transferase activity;GO:0008194//UDP-glycosyltransferase activity;GO:0035250//UDP-galactosyltransferase activity;GO:0016757//transferase activity, transferring glycosyl groups	GO:0009890//negative regulation of biosynthetic process;GO:0050789//regulation of biological process;GO:0043412//macromolecule modification;GO:1903507//negative regulation of nucleic acid-templated transcription;GO:0009889//regulation of biosynthetic process;GO:0044710//single-organism metabolic process;GO:0006325//chromatin organization;GO:0048523//negative regulation of cellular process;GO:0044…
	miR2092-x	Unigene0069709	At2g05160	1353	4.5	4	0.002	1	1	PREDICTED: zinc finger CCCH domain-containing protein 18-like isoform X1 [Nelumbo nucifera]	-	-	-	-
	miR2092-x	Unigene0063021	BSL1	377	4.5	4	0.002	1	0.5	Serine/threonine-protein phosphatase PP1, partial [Anthurium amnicola]	-	-	-	-
	miR2092-x	Unigene0018466	-	289	3	0	0.002	41	41	PREDICTED: mediator of RNA polymerase II transcription subunit 1 [Vitis vinifera]	-	-	-	-
	miR2092-x	Unigene0081961	-	396	4.5	4	0.002	1	1	--	-	-	-	-
	miR2092-x	Unigene0057184	POPTR_0012s05040g	700	3.5	4	0.002	1	1	PREDICTED: L-Ala-D/L-amino acid epimerase isoform X4 [Vitis vinifera]	-	-	GO:0016853//isomerase activity;GO:0003824//catalytic activity;GO:0016872//intramolecular lyase activity	-
	miR2092-x	Unigene0008439	At4g13590	1683	3	4	0.002	1	1	GDT1-like protein 2, chloroplastic [Anthurium amnicola]	-	-	-	-
	miR2092-x	Unigene0062763	TOC159	2180	4.5	4	0.002	1	1	PREDICTED: translocase of chloroplast 159, chloroplastic-like [Phoenix dactylifera]	-	-	-	-
	miR2092-x	Unigene0070545	ARI5	448	4.5	4	0.002	1	1	PREDICTED: E3 ubiquitin-protein ligase RNF144A [Juglans regia]	-	-	-	-
	miR2092-x	Unigene0053933	-	384	4.5	2	0.01	3	3	PREDICTED: formin-1 isoform X1 [Sesamum indicum]	-	GO:0005623//cell;GO:0005622//intracellular;GO:0044464//cell part;GO:0044424//intracellular part	GO:0005488//binding	-
	miR2092-x	Unigene0005330	At3g25440	468	4.5	4	0.002	1	1	PREDICTED: uncharacterized CRM domain-containing protein At3g25440, chloroplastic [Nelumbo nucifera]	-	-	-	-
	miR2092-x	Unigene0053063	At2g18620	396	4.5	2	0.01	10	10	chloroplast heterodimeric geranylgeranyl pyrophosphate synthase small subunit [Paeonia lactiflora]	ko01100//Metabolic pathways//Global and Overview//Metabolism;ko01110//Biosynthesis of secondary metabolites//Global and Overview//Metabolism;ko01130//Biosynthesis of antibiotics//Global and Overview//Metabolism;ko00900//Terpenoid backbone biosynthesis//Metabolism of terpenoids and polyketides//Metabolism	-	-	-
	miR2092-x	Unigene0099802	-	605	4.5	2	0.01	2	2	PREDICTED: uncharacterized protein LOC104601818 [Nelumbo nucifera]	-	-	-	-
	miR2092-x	Unigene0000464	-	2450	4	4	0	1	1	PREDICTED: uncharacterized protein LOC104594586 isoform X1 [Nelumbo nucifera]	-	-	-	-
	miR2092-x	Unigene0076689	pteN	1249	4.5	2	0.01	3	3	PREDICTED: phosphatidylinositol 3,4,5-trisphosphate 3-phosphatase and protein-tyrosine-phosphatase PTEN2A-like [Nelumbo nucifera]	ko00562//Inositol phosphate metabolism//Carbohydrate metabolism//Metabolism;ko04070//Phosphatidylinositol signaling system//Signal transduction//Environmental Information Processing	-	-	-
	miR2092-x	Unigene0052620	G3bp1	2750	4.5	2	0.01	3	3	PREDICTED: ras GTPase-activating protein-binding protein 2 isoform X1 [Nelumbo nucifera]	-	-	-	-
	miR2092-x	Unigene0003683	At3g47200	24	4	4	0.002	1	1	PREDICTED: UPF0481 protein At3g47200-like [Nelumbo nucifera]	-	-	-	-
	miR2092-x	Unigene0011722	HIS2A	467	4.5	2	0.01	11	11	PREDICTED: histone H2AX [Theobroma cacao]	-	GO:0043231//intracellular membrane-bounded organelle;GO:0044464//cell part;GO:0005623//cell;GO:0043228//non-membrane-bounded organelle;GO:0043227//membrane-bounded organelle;GO:0044424//intracellular part;GO:0043232//intracellular non-membrane-bounded organelle;GO:0005622//intracellular;GO:0043226//organelle;GO:0043229//intracellular organelle	GO:1901363//heterocyclic compound binding;GO:0046983//protein dimerization activity;GO:0003676//nucleic acid binding;GO:0005488//binding;GO:0097159//organic cyclic compound binding;GO:0005515//protein binding	-
	miR2092-x	Unigene0062243	SBEII	265	4.5	4	0.002	1	1	PREDICTED: 1,4-alpha-glucan-branching enzyme 1, chloroplastic/amyloplastic isoform X1 [Vitis vinifera]	ko01100//Metabolic pathways//Global and Overview//Metabolism;ko01110//Biosynthesis of secondary metabolites//Global and Overview//Metabolism;ko00500//Starch and sucrose metabolism//Carbohydrate metabolism//Metabolism	-	GO:0016798//hydrolase activity, acting on glycosyl bonds;GO:0016740//transferase activity;GO:0005488//binding;GO:0016757//transferase activity, transferring glycosyl groups;GO:0016787//hydrolase activity;GO:0043167//ion binding;GO:0016758//transferase activity, transferring hexosyl groups;GO:0003824//catalytic activity	GO:0071704//organic substance metabolic process;GO:0044262//cellular carbohydrate metabolic process;GO:0009987//cellular process;GO:0044264//cellular polysaccharide metabolic process;GO:0006073//cellular glucan metabolic process;GO:0044238//primary metabolic process;GO:0005975//carbohydrate metabolic process;GO:0008152//metabolic process;GO:0006112//energy reserve metabolic process;GO:0043170//ma…
	miR2092-x	Unigene0083869	INVB	1377	4.5	2	0.01	2	2	PREDICTED: probable alkaline/neutral invertase B isoform X1 [Nelumbo nucifera]	-	GO:0044464//cell part;GO:0044444//cytoplasmic part;GO:0005622//intracellular;GO:0005737//cytoplasm;GO:0005623//cell;GO:0044424//intracellular part	GO:0003824//catalytic activity;GO:0004553//hydrolase activity, hydrolyzing O-glycosyl compounds;GO:0016798//hydrolase activity, acting on glycosyl bonds;GO:0016787//hydrolase activity	-
	miR2092-x	Unigene0049770	ATX1	458	4.5	3	0.022	2	2	PREDICTED: protein qua-1-like [Nelumbo nucifera]	-	-	-	-
	miR2092-x	Unigene0088072	At4g15470	524	3	4	0.002	1	1	PREDICTED: BI1-like protein [Gossypium hirsutum]	-	GO:0031224//intrinsic component of membrane;GO:0044425//membrane part;GO:0016020//membrane	-	-
	miR2092-x	Unigene0112656	CXE6	608	4	2	0.01	5	5	PREDICTED: probable carboxylesterase 15 [Nelumbo nucifera]	-	-	-	-
	miR2092-x	Unigene0012925	AP2M	476	4.5	2	0.01	2	1	PREDICTED: AP-2 complex subunit mu [Musa acuminata subsp. malaccensis] [Musa acuminata]	ko04144//Endocytosis//Transport and catabolism//Cellular Processes	GO:0016020//membrane;GO:0005737//cytoplasm;GO:0030117//membrane coat;GO:0044444//cytoplasmic part;GO:0030119//AP-type membrane coat adaptor complex;GO:0043234//protein complex;GO:0005623//cell;GO:0098796//membrane protein complex;GO:0048475//coated membrane;GO:0044424//intracellular part;GO:0032991//macromolecular complex;GO:0005622//intracellular;GO:0044464//cell part;GO:0044425//membrane part	GO:0043168//anion binding;GO:0043167//ion binding;GO:0005488//binding	GO:0045184//establishment of protein localization;GO:0006810//transport;GO:0033036//macromolecule localization;GO:0051179//localization;GO:0008104//protein localization;GO:0008152//metabolic process;GO:0015031//protein transport;GO:0051234//establishment of localization;GO:0071702//organic substance transport
	miR2092-x	Unigene0062012	-	168	4	2	0.01	8	2.66667	PREDICTED: lysophospholipid acyltransferase LPEAT2-like [Arachis ipaensis]	ko01100//Metabolic pathways//Global and Overview//Metabolism;ko00564//Glycerophospholipid metabolism//Lipid metabolism//Metabolism;ko00565//Ether lipid metabolism//Lipid metabolism//Metabolism	-	-	GO:0006629//lipid metabolic process;GO:0044699//single-organism process;GO:0008152//metabolic process;GO:0044238//primary metabolic process;GO:0071704//organic substance metabolic process;GO:0044710//single-organism metabolic process
	miR2092-x	Unigene0085051	-	43	4	4	0.002	1	1	--	-	-	-	-
	miR2092-x	Unigene0002619	LPEAT2	960	4	2	0.01	8	2.66667	PREDICTED: lysophospholipid acyltransferase LPEAT2-like [Nelumbo nucifera]	ko01100//Metabolic pathways//Global and Overview//Metabolism;ko00564//Glycerophospholipid metabolism//Lipid metabolism//Metabolism;ko00565//Ether lipid metabolism//Lipid metabolism//Metabolism	GO:0016020//membrane	GO:0016746//transferase activity, transferring acyl groups;GO:0016740//transferase activity;GO:0003824//catalytic activity	GO:0006644//phospholipid metabolic process;GO:0044699//single-organism process;GO:0044710//single-organism metabolic process;GO:0008152//metabolic process;GO:0044255//cellular lipid metabolic process;GO:0019637//organophosphate metabolic process;GO:0044238//primary metabolic process;GO:0044237//cellular metabolic process;GO:0009987//cellular process;GO:0006793//phosphorus metabolic process;GO:004…
	miR2092-x	Unigene0010121	-	431	4	3	0	6	6	Tetratricopeptide-like helical [Cynara cardunculus var. scolymus] [Cynara cardunculus]	-	-	-	-
	miR2092-x	Unigene0079123	At4g22670	578	4.5	4	0.002	1	1	PREDICTED: TPR repeat-containing thioredoxin TDX isoform X1 [Musa acuminata subsp. malaccensis] [Musa acuminata]	-	-	-	-
	miR2092-x	Unigene0096216	LACS4	485	4	2	0.01	6	6	PREDICTED: long chain acyl-CoA synthetase 4-like isoform X2 [Nelumbo nucifera]	ko01100//Metabolic pathways//Global and Overview//Metabolism;ko04146//Peroxisome//Transport and catabolism//Cellular Processes;ko01212//Fatty acid metabolism//Global and Overview//Metabolism;ko00061//Fatty acid biosynthesis//Lipid metabolism//Metabolism;ko00071//Fatty acid degradation//Lipid metabolism//Metabolism	-	-	-
	miR2092-x	Unigene0077566	MED26B	273	4.5	4	0.002	1	0.5	PREDICTED: probable mediator of RNA polymerase II transcription subunit 26b [Nelumbo nucifera]	-	-	-	-
	miR2092-x	Unigene0049298	-	507	4.5	4	0.002	1	1	PREDICTED: protein SMAX1-LIKE 3-like [Nelumbo nucifera]	-	-	-	-
	miR2092-x	Unigene0047292	-	385	4	2	0.01	2	1	PREDICTED: rRNA-processing protein EFG1 isoform X1 [Cucumis sativus]	-	-	-	-
	miR2092-x	Unigene0001026	RNU1	48	4.5	2	0.01	5	2.5	PREDICTED: U1 small nuclear ribonucleoprotein 70 kDa-like [Nelumbo nucifera]	ko03040//Spliceosome//Transcription//Genetic Information Processing	-	-	-
	miR2092-x	Unigene0060816	PP2C	1449	3.5	4	0.002	1	1	phosphatase 2C (PP2C)-like protein [Corchorus capsularis]	-	-	GO:0016791//phosphatase activity;GO:0016788//hydrolase activity, acting on ester bonds;GO:0003824//catalytic activity;GO:0005488//binding;GO:0043167//ion binding;GO:0004721//phosphoprotein phosphatase activity;GO:0043169//cation binding;GO:0042578//phosphoric ester hydrolase activity;GO:0016787//hydrolase activity	GO:0044260//cellular macromolecule metabolic process;GO:0043412//macromolecule modification;GO:0044237//cellular metabolic process;GO:0071704//organic substance metabolic process;GO:0036211//protein modification process;GO:0019538//protein metabolic process;GO:0008152//metabolic process;GO:0044267//cellular protein metabolic process;GO:0006464//cellular protein modification process;GO:0009987//ce…
	miR2092-x	Unigene0082191	DXR	1184	4.5	2	0.01	3	3	1-deoxy-D-xylulose 5-phosphate reductoisomerase [Cinnamomum camphora]	ko01100//Metabolic pathways//Global and Overview//Metabolism;ko01110//Biosynthesis of secondary metabolites//Global and Overview//Metabolism;ko01130//Biosynthesis of antibiotics//Global and Overview//Metabolism;ko00900//Terpenoid backbone biosynthesis//Metabolism of terpenoids and polyketides//Metabolism	-	GO:0043168//anion binding;GO:0016614//oxidoreductase activity, acting on CH-OH group of donors;GO:0043169//cation binding;GO:0016491//oxidoreductase activity;GO:0016616//oxidoreductase activity, acting on the CH-OH group of donors, NAD or NADP as acceptor;GO:0003824//catalytic activity;GO:0043167//ion binding;GO:0005488//binding	GO:0044699//single-organism process;GO:0044710//single-organism metabolic process;GO:0008152//metabolic process
	miR2092-x	Unigene0084975	GIP	369	4.5	2	0.01	3	3	Cysteine-rich RLK (receptor-like protein kinase) 8 [Dorcoceras hygrometricum]	-	-	-	-
	miR2092-x	Unigene0066152	EMB1674	568	3.5	4	0.002	1	1	PREDICTED: protein EMBRYO DEFECTIVE 1674-like isoform X1 [Prunus mume]	-	-	-	-
	miR2092-x	Unigene0056586	-	1566	4.5	4	0.002	1	0.5	2OG-FeII_Oxy domain-containing protein/DIOX_N domain-containing protein [Cephalotus follicularis]	-	-	-	-
	miR2092-x	Unigene0070204	DAPB2	1213	4.5	4	0.002	1	1	PREDICTED: 4-hydroxy-tetrahydrodipicolinate reductase 1, chloroplastic-like isoform X1 [Nelumbo nucifera]	ko01100//Metabolic pathways//Global and Overview//Metabolism;ko01110//Biosynthesis of secondary metabolites//Global and Overview//Metabolism;ko01130//Biosynthesis of antibiotics//Global and Overview//Metabolism;ko01120//Microbial metabolism in diverse environments//Global and Overview//Metabolism;ko01230//Biosynthesis of amino acids//Global and Overview//Metabolism;ko00300//Lysine biosynthesis//A…	-	-	-
	miR2092-x	Unigene0010121	-	923	4.5	2	0.01	47	47	Tetratricopeptide-like helical [Cynara cardunculus var. scolymus] [Cynara cardunculus]	-	-	-	-
	miR2092-x	Unigene0072604	CNOT3	51	4.5	2	0.01	3	3	CCR4-NOT transcription complex subunit 3 [Anthurium amnicola]	ko03018//RNA degradation//Folding, sorting and degradation//Genetic Information Processing	-	-	-
	miR2092-x	Unigene0048995	-	1599	4.5	4	0.002	1	1	PREDICTED: uncharacterized protein LOC8277156 [Ricinus communis]	-	-	-	-
	miR2092-x	Unigene0072538	PFP-BETA	990	4.5	2	0.01	9	9	PREDICTED: pyrophosphate--fructose 6-phosphate 1-phosphotransferase subunit beta [Nelumbo nucifera]	ko01100//Metabolic pathways//Global and Overview//Metabolism;ko01110//Biosynthesis of secondary metabolites//Global and Overview//Metabolism;ko01130//Biosynthesis of antibiotics//Global and Overview//Metabolism;ko01120//Microbial metabolism in diverse environments//Global and Overview//Metabolism;ko00051//Fructose and mannose metabolism//Carbohydrate metabolism//Metabolism	GO:0005623//cell;GO:0044424//intracellular part;GO:0030312//external encapsulating structure;GO:0044444//cytoplasmic part;GO:0005829//cytosol;GO:0044445//cytosolic part;GO:0044464//cell part;GO:0071944//cell periphery;GO:0005622//intracellular;GO:0005737//cytoplasm	GO:0097159//organic cyclic compound binding;GO:0016773//phosphotransferase activity, alcohol group as acceptor;GO:0097367//carbohydrate derivative binding;GO:0003824//catalytic activity;GO:0016740//transferase activity;GO:0016301//kinase activity;GO:0008443//phosphofructokinase activity;GO:0001883//purine nucleoside binding;GO:0036094//small molecule binding;GO:0005488//binding;GO:0019200//carboh…	GO:0051276//chromosome organization;GO:0018193//peptidyl-amino acid modification;GO:0006796//phosphate-containing compound metabolic process;GO:0008213//protein alkylation;GO:0044238//primary metabolic process;GO:0006084//acetyl-CoA metabolic process;GO:0019752//carboxylic acid metabolic process;GO:0010605//negative regulation of macromolecule metabolic process;GO:0009892//negative regulation of …
	miR2092-x	Unigene0096522	-	1910	4.5	4	0.002	1	1	PREDICTED: uncharacterized protein LOC104588898 [Nelumbo nucifera]	-	-	-	-
	miR2092-x	Unigene0067695	SGO1	456	4	4	0.002	1	1	PREDICTED: shugoshin-1-like isoform X4 [Nelumbo nucifera]	-	-	-	-
	miR2092-x	Unigene0101058	TOM20	444	4.5	2	0.01	2	2	PREDICTED: mitochondrial import receptor subunit TOM20 isoform X1 [Musa acuminata subsp. malaccensis] [Musa acuminata]	-	GO:0005737//cytoplasm;GO:0044425//membrane part;GO:0031966//mitochondrial membrane;GO:0005840//ribosome;GO:0030529//intracellular ribonucleoprotein complex;GO:0043229//intracellular organelle;GO:0031090//organelle membrane;GO:0031975//envelope;GO:0005623//cell;GO:0044429//mitochondrial part;GO:0005622//intracellular;GO:0043227//membrane-bounded organelle;GO:0043228//non-membrane-bounded organelle…	GO:0008320//protein transmembrane transporter activity;GO:0043169//cation binding;GO:0022884//macromolecule transmembrane transporter activity;GO:0005215//transporter activity;GO:0043167//ion binding;GO:0005488//binding;GO:0022891//substrate-specific transmembrane transporter activity;GO:0022857//transmembrane transporter activity;GO:0022892//substrate-specific transporter activity;GO:0008565//pr…	GO:0051234//establishment of localization;GO:0051649//establishment of localization in cell;GO:0044765//single-organism transport;GO:0033036//macromolecule localization;GO:0070727//cellular macromolecule localization;GO:0006605//protein targeting;GO:0045184//establishment of protein localization;GO:0051641//cellular localization;GO:0051179//localization;GO:0006886//intracellular protein transport…
	miR2092-x	Unigene0060075	ARP	405	2	2	0.01	3	3	PREDICTED: DNA-(apurinic or apyrimidinic site) lyase, chloroplastic isoform X1 [Nelumbo nucifera]	ko03410//Base excision repair//Replication and repair//Genetic Information Processing	-	-	-
	miR2092-x	Unigene0007414	SIS3	84	3	4	0.002	1	1	zf-RING_2 domain-containing protein [Cephalotus follicularis]	-	GO:0016020//membrane;GO:0031224//intrinsic component of membrane;GO:0044425//membrane part	GO:0043167//ion binding;GO:0046872//metal ion binding;GO:0016740//transferase activity;GO:0019787//ubiquitin-like protein transferase activity;GO:0005488//binding;GO:0046914//transition metal ion binding;GO:0043169//cation binding;GO:0003824//catalytic activity	GO:0071704//organic substance metabolic process;GO:0009987//cellular process;GO:0010410//hemicellulose metabolic process;GO:0006950//response to stress;GO:1901700//response to oxygen-containing compound;GO:0009642//response to light intensity;GO:0009743//response to carbohydrate;GO:0044036//cell wall macromolecule metabolic process;GO:0044700//single organism signaling;GO:0044237//cellular metabo…
	miR2092-x	Unigene0036078	MBF1B	114	3.5	2	0.01	4	4	PREDICTED: multiprotein-bridging factor 1b [Amborella trichopoda]	-	-	GO:1901363//heterocyclic compound binding;GO:0097159//organic cyclic compound binding;GO:0005488//binding;GO:0003677//DNA binding;GO:0003676//nucleic acid binding	-
	miR2092-x	Unigene0041728	GAMMACA1	46	3.5	4	0.002	1	0.5	PREDICTED: gamma carbonic anhydrase 1, mitochondrial-like [Gossypium raimondii]	-	-	-	-
	miR2092-x	Unigene0005998	PIP5K1	2570	4	2	0.01	2	2	PREDICTED: phosphatidylinositol 4-phosphate 5-kinase 1-like [Nelumbo nucifera]	ko01100//Metabolic pathways//Global and Overview//Metabolism;ko04144//Endocytosis//Transport and catabolism//Cellular Processes;ko00562//Inositol phosphate metabolism//Carbohydrate metabolism//Metabolism;ko04070//Phosphatidylinositol signaling system//Signal transduction//Environmental Information Processing	-	GO:0016740//transferase activity;GO:0016772//transferase activity, transferring phosphorus-containing groups;GO:0003824//catalytic activity;GO:0016301//kinase activity	GO:0046486//glycerolipid metabolic process;GO:0006629//lipid metabolic process;GO:0071704//organic substance metabolic process;GO:0044255//cellular lipid metabolic process;GO:0019637//organophosphate metabolic process;GO:0006793//phosphorus metabolic process;GO:0044238//primary metabolic process;GO:0006650//glycerophospholipid metabolic process;GO:0044763//single-organism cellular process;GO:0006…
	miR2092-x	Unigene0092860	At5g01610	430	4.5	4	0.002	1	1	PREDICTED: uncharacterized protein LOC104592265 [Nelumbo nucifera]	-	-	-	-
	miR2092-x	Unigene0099802	-	606	3.5	4	0.002	1	1	PREDICTED: uncharacterized protein LOC104601818 [Nelumbo nucifera]	-	-	-	-
	miR2092-x	Unigene0043391	slr0305	320	4	2	0.01	4	4	PREDICTED: transmembrane protein 64 [Fragaria vesca subsp. vesca] [Fragaria vesca]	-	-	-	-
	miR2092-x	Unigene0041729	GAMMACA2	46	3.5	4	0.002	1	0.5	PREDICTED: gamma carbonic anhydrase 1, mitochondrial [Prunus mume]	-	-	-	-
	miR2092-x	Unigene0049034	HPD	691	4.5	2	0.01	10	10	PREDICTED: 4-hydroxyphenylpyruvate dioxygenase [Nelumbo nucifera]	ko01100//Metabolic pathways//Global and Overview//Metabolism;ko00350//Tyrosine metabolism//Amino acid metabolism//Metabolism;ko00360//Phenylalanine metabolism//Amino acid metabolism//Metabolism;ko00130//Ubiquinone and other terpenoid-quinone biosynthesis//Metabolism of cofactors and vitamins//Metabolism	-	GO:0003824//catalytic activity;GO:0005488//binding;GO:0043169//cation binding;GO:0043167//ion binding;GO:0016491//oxidoreductase activity	GO:0043436//oxoacid metabolic process;GO:0071704//organic substance metabolic process;GO:0006082//organic acid metabolic process;GO:0044238//primary metabolic process;GO:0044699//single-organism process;GO:0009987//cellular process;GO:0044281//small molecule metabolic process;GO:0044237//cellular metabolic process;GO:1901564//organonitrogen compound metabolic process;GO:0019752//carboxylic acid m…
	miR2092-x	Unigene0055881	ppk15	3319	4.5	4	0.002	1	1	PREDICTED: dual specificity tyrosine-phosphorylation-regulated kinase 1B-like [Nelumbo nucifera]	-	-	-	-
	miR2092-x	Unigene0078896	-	707	4.5	4	0.002	1	1	PREDICTED: uncharacterized protein LOC104598255 [Nelumbo nucifera]	-	-	-	-
	miR2092-x	Unigene0033834	HSL1	1298	4.5	2	0.01	3	3	PREDICTED: receptor-like protein kinase HSL1 [Nelumbo nucifera]	-	-	-	-
	miR2092-x	Unigene0043391	slr0305	319	4	2	0.01	4	4	PREDICTED: transmembrane protein 64 [Fragaria vesca subsp. vesca] [Fragaria vesca]	-	-	-	-
	miR2092-x	Unigene0046213	eft201	1133	4	2	0.01	5	5	elongation factor 2 [Ananas comosus]	-	GO:0032991//macromolecular complex;GO:0030529//intracellular ribonucleoprotein complex;GO:1990904//ribonucleoprotein complex;GO:0044464//cell part;GO:0005622//intracellular;GO:0005623//cell;GO:0044424//intracellular part	GO:0097367//carbohydrate derivative binding;GO:0003824//catalytic activity;GO:0003723//RNA binding;GO:0016462//pyrophosphatase activity;GO:0032550//purine ribonucleoside binding;GO:0016818//hydrolase activity, acting on acid anhydrides, in phosphorus-containing anhydrides;GO:0016817//hydrolase activity, acting on acid anhydrides;GO:1901363//heterocyclic compound binding;GO:0032549//ribonucleoside…	GO:0044260//cellular macromolecule metabolic process;GO:0071704//organic substance metabolic process;GO:0008152//metabolic process;GO:1901576//organic substance biosynthetic process;GO:0009058//biosynthetic process;GO:0044249//cellular biosynthetic process;GO:0009059//macromolecule biosynthetic process;GO:0044237//cellular metabolic process;GO:0009987//cellular process;GO:0043170//macromolecule m…
	miR2092-x	Unigene0048434	MIP3	634	4	4	0.002	1	1	PREDICTED: sec1 family domain-containing protein MIP3-like isoform X1 [Ziziphus jujuba]	-	-	-	-
	miR2092-x	Unigene0042207	SDH	948	4.5	4	0.002	1	1	ADH_zinc_N domain-containing protein/ADH_N domain-containing protein [Cephalotus follicularis]	ko01100//Metabolic pathways//Global and Overview//Metabolism;ko00040//Pentose and glucuronate interconversions//Carbohydrate metabolism//Metabolism;ko00051//Fructose and mannose metabolism//Carbohydrate metabolism//Metabolism	-	GO:0043169//cation binding;GO:0003824//catalytic activity;GO:0005488//binding;GO:0043167//ion binding	GO:0044699//single-organism process;GO:0044710//single-organism metabolic process;GO:0008152//metabolic process
	miR2092-x	Unigene0056950	SBP2	1402	3.5	2	0.01	3	3	PREDICTED: selenium-binding protein 1 [Theobroma cacao]	-	-	-	-
	miR2092-x	Unigene0080555	Acel_0614	1534	4.5	2	0.01	2	2	Cellulase protein [Theobroma cacao]	-	-	GO:0016787//hydrolase activity;GO:0003824//catalytic activity	GO:0044238//primary metabolic process;GO:0008152//metabolic process
	miR2092-x	Unigene0006038	GA20OX1	1422	3.5	4	0.002	1	1	PREDICTED: protein DMR6-LIKE OXYGENASE 1 [Nelumbo nucifera]	-	-	GO:0003824//catalytic activity;GO:0043169//cation binding;GO:0016705//oxidoreductase activity, acting on paired donors, with incorporation or reduction of molecular oxygen;GO:0005488//binding;GO:0043167//ion binding;GO:0016491//oxidoreductase activity	GO:0044699//single-organism process;GO:0044710//single-organism metabolic process;GO:0008152//metabolic process
	miR2092-x	Unigene0021225	MIP1	2449	4.5	4	0.002	1	1	PREDICTED: MND1-interacting protein 1 [Vitis vinifera]	-	-	-	-
	miR2092-x	Unigene0065294	SKI3	431	4.5	2	0.01	2	2	PREDICTED: tetratricopeptide repeat protein SKI3 [Nelumbo nucifera]	ko03018//RNA degradation//Folding, sorting and degradation//Genetic Information Processing	-	-	-
	miR2092-x	Unigene0079192	-	447	4	2	0.01	17	17	--	-	-	-	-
	miR2092-x	Unigene0072354	CNOT4	2166	4.5	4	0.002	1	1	CCR4-NOT transcription complex subunit 4 [Morus notabilis]	ko03018//RNA degradation//Folding, sorting and degradation//Genetic Information Processing	-	-	-
	miR2092-x	Unigene0063854	HDH	1404	4.5	2	0.01	5	5	PREDICTED: histidinol dehydrogenase, chloroplastic isoform X1 [Elaeis guineensis]	ko01100//Metabolic pathways//Global and Overview//Metabolism;ko01110//Biosynthesis of secondary metabolites//Global and Overview//Metabolism;ko01230//Biosynthesis of amino acids//Global and Overview//Metabolism;ko00340//Histidine metabolism//Amino acid metabolism//Metabolism	GO:0009536//plastid;GO:0043226//organelle;GO:0044435//plastid part;GO:0005622//intracellular;GO:0043229//intracellular organelle;GO:0009532//plastid stroma;GO:0044444//cytoplasmic part;GO:0043227//membrane-bounded organelle;GO:0005737//cytoplasm;GO:0044422//organelle part;GO:0044424//intracellular part;GO:0005623//cell;GO:0043231//intracellular membrane-bounded organelle;GO:0044464//cell part;GO:…	GO:1901363//heterocyclic compound binding;GO:0046872//metal ion binding;GO:0043169//cation binding;GO:0003824//catalytic activity;GO:0036094//small molecule binding;GO:0046914//transition metal ion binding;GO:0016616//oxidoreductase activity, acting on the CH-OH group of donors, NAD or NADP as acceptor;GO:0016491//oxidoreductase activity;GO:1901265//nucleoside phosphate binding;GO:0016614//oxidor…	GO:0009058//biosynthetic process;GO:0006520//cellular amino acid metabolic process;GO:0007275//multicellular organism development;GO:0044106//cellular amine metabolic process;GO:0044237//cellular metabolic process;GO:1901564//organonitrogen compound metabolic process;GO:0044249//cellular biosynthetic process;GO:0009987//cellular process;GO:0044710//single-organism metabolic process;GO:0006807//ni…
	miR2092-x	Unigene0039560	RPB2	1836	4.5	4	0.002	1	1	PREDICTED: DNA-directed RNA polymerase II subunit RPB2 [Nelumbo nucifera]	ko01100//Metabolic pathways//Global and Overview//Metabolism;ko00230//Purine metabolism//Nucleotide metabolism//Metabolism;ko00240//Pyrimidine metabolism//Nucleotide metabolism//Metabolism;ko03020//RNA polymerase//Transcription//Genetic Information Processing	GO:0044464//cell part;GO:0030054//cell junction;GO:0005634//nucleus;GO:0005911//cell-cell junction;GO:0044444//cytoplasmic part;GO:0044451//nucleoplasm part;GO:0043231//intracellular membrane-bounded organelle;GO:0044428//nuclear part;GO:0005622//intracellular;GO:0044422//organelle part;GO:0043233//organelle lumen;GO:0031981//nuclear lumen;GO:0070013//intracellular organelle lumen;GO:0005737//cyt…	GO:0097159//organic cyclic compound binding;GO:0005488//binding;GO:0034062//RNA polymerase activity;GO:0036094//small molecule binding;GO:1901363//heterocyclic compound binding;GO:0043167//ion binding;GO:0001882//nucleoside binding;GO:0003676//nucleic acid binding;GO:0003824//catalytic activity;GO:0043169//cation binding;GO:0016772//transferase activity, transferring phosphorus-containing groups;…	GO:1901360//organic cyclic compound metabolic process;GO:1901362//organic cyclic compound biosynthetic process;GO:0046700//heterocycle catabolic process;GO:0006725//cellular aromatic compound metabolic process;GO:0008152//metabolic process;GO:0034654//nucleobase-containing compound biosynthetic process;GO:0044249//cellular biosynthetic process;GO:0019439//aromatic compound catabolic process;GO:00…
	miR2092-x	Unigene0052105	TSB	269	4.5	3	0.022	2	2	PREDICTED: tryptophan synthase beta chain 1 [Nelumbo nucifera]	ko01100//Metabolic pathways//Global and Overview//Metabolism;ko01110//Biosynthesis of secondary metabolites//Global and Overview//Metabolism;ko01130//Biosynthesis of antibiotics//Global and Overview//Metabolism;ko01230//Biosynthesis of amino acids//Global and Overview//Metabolism;ko00260//Glycine, serine and threonine metabolism//Amino acid metabolism//Metabolism;ko00400//Phenylalanine, tyrosine …	-	-	-
	miR2092-x	Unigene0070795	Os06g0508700	2327	4.5	4	0.002	1	1	PREDICTED: probable methionine--tRNA ligase [Nelumbo nucifera]	ko00970//Aminoacyl-tRNA biosynthesis//Translation//Genetic Information Processing;ko00450//Selenocompound metabolism//Metabolism of other amino acids//Metabolism	-	-	-
	miR2092-x	Unigene0112215	-	592	4.5	2	0.01	2	1	PREDICTED: translation initiation factor IF-2 isoform X1 [Cucumis melo]	-	-	-	-
	miR2092-x	Unigene0045504	SCC3	1129	4.5	4	0.002	1	1	PREDICTED: sister-chromatid cohesion protein 3 [Elaeis guineensis]	-	-	-	-
	miR2092-x	Unigene0092336	SHM3	1258	4.5	4	0.002	1	1	PREDICTED: serine hydroxymethyltransferase 3, chloroplastic isoform X1 [Nelumbo nucifera]	ko01100//Metabolic pathways//Global and Overview//Metabolism;ko01110//Biosynthesis of secondary metabolites//Global and Overview//Metabolism;ko01130//Biosynthesis of antibiotics//Global and Overview//Metabolism;ko01120//Microbial metabolism in diverse environments//Global and Overview//Metabolism;ko01200//Carbon metabolism//Global and Overview//Metabolism;ko01230//Biosynthesis of amino acids//Glo…	-	GO:0016740//transferase activity;GO:0016742//hydroxymethyl-, formyl- and related transferase activity;GO:0003824//catalytic activity;GO:0005488//binding;GO:0016741//transferase activity, transferring one-carbon groups;GO:0043168//anion binding;GO:0043167//ion binding	GO:0044763//single-organism cellular process;GO:0044699//single-organism process;GO:0043436//oxoacid metabolic process;GO:0044237//cellular metabolic process;GO:0044710//single-organism metabolic process;GO:0009069//serine family amino acid metabolic process;GO:0019752//carboxylic acid metabolic process;GO:0071704//organic substance metabolic process;GO:0008152//metabolic process;GO:1901564//orga…
	miR2092-x	Unigene0112459	-	834	4	2	0.01	3	3	UDP-N-acetylmuramoylalanine--D-glutamate ligase [Anthurium amnicola]	-	GO:0043227//membrane-bounded organelle;GO:0043229//intracellular organelle;GO:0044434//chloroplast part;GO:0043226//organelle;GO:0009536//plastid;GO:0044435//plastid part;GO:0044446//intracellular organelle part;GO:0009507//chloroplast;GO:0043231//intracellular membrane-bounded organelle;GO:0044464//cell part;GO:0005737//cytoplasm;GO:0044422//organelle part;GO:0005623//cell;GO:0044424//intracellu…	-	-
	miR2092-x	Unigene0030272	AGPS1	194	4.5	4	0.002	1	1	AGPS1 [Gladiolus hybrid cultivar]	ko01100//Metabolic pathways//Global and Overview//Metabolism;ko01110//Biosynthesis of secondary metabolites//Global and Overview//Metabolism;ko00500//Starch and sucrose metabolism//Carbohydrate metabolism//Metabolism;ko00520//Amino sugar and nucleotide sugar metabolism//Carbohydrate metabolism//Metabolism	GO:0044444//cytoplasmic part;GO:0005622//intracellular;GO:0043229//intracellular organelle;GO:0043226//organelle;GO:0005737//cytoplasm;GO:0005623//cell;GO:0043227//membrane-bounded organelle;GO:0043231//intracellular membrane-bounded organelle;GO:0044424//intracellular part;GO:0044464//cell part;GO:0009536//plastid	GO:0016740//transferase activity;GO:0003824//catalytic activity;GO:0016779//nucleotidyltransferase activity;GO:0016772//transferase activity, transferring phosphorus-containing groups;GO:0070566//adenylyltransferase activity	GO:0015980//energy derivation by oxidation of organic compounds;GO:0005976//polysaccharide metabolic process;GO:0043170//macromolecule metabolic process;GO:0055114//oxidation-reduction process;GO:0006073//cellular glucan metabolic process;GO:0044723//single-organism carbohydrate metabolic process;GO:0006091//generation of precursor metabolites and energy;GO:0044260//cellular macromolecule metabol…
	miR2092-x	Unigene0027416	CYP19-3	220	4.5	3	0.022	2	2	PREDICTED: peptidyl-prolyl cis-trans isomerase CYP19-3 [Elaeis guineensis]	-	-	-	-
	miR2092-x	Unigene0047852	-	290	4.5	4	0.002	1	0.5	PREDICTED: uncharacterized protein LOC104592492 isoform X2 [Nelumbo nucifera]	-	-	-	-
	miR2092-x	Unigene0068491	IMPA1	964	4.5	4	0.002	1	1	PREDICTED: importin subunit alpha-1 [Nelumbo nucifera]	-	GO:0005622//intracellular;GO:0005623//cell;GO:0044424//intracellular part;GO:0044464//cell part	GO:0005215//transporter activity;GO:0022892//substrate-specific transporter activity	GO:0006810//transport;GO:0051641//cellular localization;GO:0051234//establishment of localization;GO:0006886//intracellular protein transport;GO:0051649//establishment of localization in cell;GO:0033036//macromolecule localization;GO:0008104//protein localization;GO:0071702//organic substance transport;GO:0070727//cellular macromolecule localization;GO:0015031//protein transport;GO:0034613//cellu…
	miR2092-x	Unigene0108038	CCDC174	266	4.5	2	0.01	2	2	PREDICTED: uncharacterized protein At4g18257-like [Nelumbo nucifera]	-	-	-	-
	miR2092-x	Unigene0060075	ARP	406	4	2	0.01	3	3	PREDICTED: DNA-(apurinic or apyrimidinic site) lyase, chloroplastic isoform X1 [Nelumbo nucifera]	ko03410//Base excision repair//Replication and repair//Genetic Information Processing	-	-	-
	miR2092-x	Unigene0080555	Acel_0614	1533	4.5	4	0.002	1	1	Cellulase protein [Theobroma cacao]	-	-	GO:0016787//hydrolase activity;GO:0003824//catalytic activity	GO:0044238//primary metabolic process;GO:0008152//metabolic process
	miR2092-x	Unigene0069651	NAR1	1327	4	4	0.002	1	1	protein NAR1 [Ananas comosus]	-	-	-	-
	miR2092-x	Unigene0044956	HST	415	4.5	2	0.01	2	2	PREDICTED: shikimate O-hydroxycinnamoyltransferase [Nelumbo nucifera]	-	-	-	-
	miR2092-x	Unigene0079454	At1g04430	2176	4	2	0.01	2	2	PREDICTED: probable methyltransferase PMT3 [Eucalyptus grandis]	-	-	-	-
	miR2092-x	Unigene0038288	Zmynd15	629	4	4	0.002	1	1	PREDICTED: zinc finger MYND domain-containing protein 15 isoform X2 [Nelumbo nucifera]	-	-	-	-
	miR2092-x	Unigene0009495	DI19-6	527	4.5	2	0.01	3	3	PREDICTED: protein DEHYDRATION-INDUCED 19 homolog 5-like [Nelumbo nucifera]	-	-	-	-
	miR2092-x	Unigene0047849	-	775	4.5	4	0.002	1	0.5	PREDICTED: uncharacterized protein LOC104592492 isoform X1 [Nelumbo nucifera]	-	-	-	-
	miR2092-x	Unigene0064582	AMY3	2592	4	4	0.002	1	1	Alpha-amylase isozyme 2A, partial [Anthurium amnicola]	ko01100//Metabolic pathways//Global and Overview//Metabolism;ko00500//Starch and sucrose metabolism//Carbohydrate metabolism//Metabolism	-	GO:0043167//ion binding;GO:0016798//hydrolase activity, acting on glycosyl bonds;GO:0043169//cation binding;GO:0016160//amylase activity;GO:0016787//hydrolase activity;GO:0003824//catalytic activity;GO:0004553//hydrolase activity, hydrolyzing O-glycosyl compounds;GO:0046872//metal ion binding;GO:0005488//binding	GO:0044238//primary metabolic process;GO:0008152//metabolic process
	miR2092-x	Unigene0069696	-	243	4	2	0.01	3	3	--	-	-	-	-
	miR2092-x	Unigene0027827	RBL15	549	4.5	4	0.002	1	1	rhomboid protein Panut_RBL15, partial [Pandanus utilis]	-	-	-	-
	miR2092-x	Unigene0020980	PSAP	920	4	4	0.002	1	1	PREDICTED: prosaposin [Prunus mume]	-	-	-	-
	miR2092-x	Unigene0004962	-	495	3.5	2	0.01	2	1	octicosapeptide/Phox/Bem1p domain-containing family protein [Populus trichocarpa]	-	-	-	-
	miR2092-x	Unigene0083769	SPT16	2714	4.5	2	0.01	5	5	PREDICTED: FACT complex subunit SPT16 [Vitis vinifera]	-	-	-	-
	miR2092-x	Unigene0050160	ELD1	1644	4.5	4	0.002	1	0.5	PREDICTED: glycosyltransferase-like KOBITO 1 [Vitis vinifera]	-	-	-	-
	miR2092-x	Unigene0077562	G3bp1	2850	4	2	0.01	3	3	PREDICTED: ras GTPase-activating protein-binding protein 2 isoform X2 [Nelumbo nucifera]	-	-	-	-
	miR2092-x	Unigene0102668	At2g39020	503	4	4	0.002	1	1	PREDICTED: probable acetyltransferase NATA1-like [Nelumbo nucifera]	-	-	GO:0003824//catalytic activity;GO:0016747//transferase activity, transferring acyl groups other than amino-acyl groups;GO:0016740//transferase activity;GO:0016746//transferase activity, transferring acyl groups	-
	miR2092-x	Unigene0001185	-	1294	3.5	4	0.002	1	1	PREDICTED: uncharacterized protein LOC104605314 [Nelumbo nucifera]	-	-	-	-
	miR2092-x	Unigene0066086	At3g50210	1792	4.5	2	0.01	4	4	PREDICTED: probable 2-oxoglutarate-dependent dioxygenase At3g49630 [Ziziphus jujuba]	-	-	GO:0016491//oxidoreductase activity;GO:0046872//metal ion binding;GO:0005488//binding;GO:0046914//transition metal ion binding;GO:0043167//ion binding;GO:0043169//cation binding;GO:0016705//oxidoreductase activity, acting on paired donors, with incorporation or reduction of molecular oxygen;GO:0003824//catalytic activity	GO:0008152//metabolic process;GO:0044699//single-organism process;GO:0044710//single-organism metabolic process
	miR2092-x	Unigene0100574	RCOM_0530710	771	4	4	0.002	1	1	PREDICTED: glycosyltransferase family 92 protein RCOM_0530710 [Vitis vinifera]	-	-	-	-
	miR2092-x	Unigene0043147	RNU1	48	4.5	2	0.01	5	2.5	PREDICTED: U1 small nuclear ribonucleoprotein 70 kDa-like [Nelumbo nucifera]	ko03040//Spliceosome//Transcription//Genetic Information Processing	-	-	-
	miR2092-x	Unigene0001561	-	420	3.5	4	0.002	1	1	PREDICTED: protein PIN-LIKES 3-like [Malus domestica]	-	-	-	-
	miR2092-x	Unigene0064789	PARB	73	4.5	3	0.022	10	10	glutathione S-transferase [Vitis vinifera]	ko00480//Glutathione metabolism//Metabolism of other amino acids//Metabolism	-	-	-
	miR2092-x	Unigene0010172	SOD	433	3.5	3	0	3	3	PREDICTED: superoxide dismutase [Mn], mitochondrial [Gossypium hirsutum]	ko04146//Peroxisome//Transport and catabolism//Cellular Processes	-	GO:0043167//ion binding;GO:0003824//catalytic activity;GO:0005488//binding;GO:0043169//cation binding	GO:0044237//cellular metabolic process;GO:0009987//cellular process;GO:0072593//reactive oxygen species metabolic process;GO:0044710//single-organism metabolic process;GO:0008152//metabolic process;GO:0044699//single-organism process;GO:0006801//superoxide metabolic process
	miR2092-x	Unigene0104922	HHT1	529	4	2	0.01	3	3	PREDICTED: omega-hydroxypalmitate O-feruloyl transferase-like [Nelumbo nucifera]	ko00073//Cutin, suberine and wax biosynthesis//Lipid metabolism//Metabolism	-	GO:0016747//transferase activity, transferring acyl groups other than amino-acyl groups;GO:0016740//transferase activity;GO:0003824//catalytic activity;GO:0016746//transferase activity, transferring acyl groups	-
	miR2092-x	Unigene0109582	-	474	4.5	4	0.002	1	1	--	-	-	-	-
	miR2092-x	Unigene0110771	44257	541	4.5	2	0.01	3	3	PREDICTED: mitochondrial amidoxime reducing component 2 isoform X1 [Nelumbo nucifera]	-	-	GO:0046914//transition metal ion binding;GO:0043167//ion binding;GO:0005488//binding;GO:0043169//cation binding;GO:0043168//anion binding;GO:0046872//metal ion binding	-
	miR2092-x	Unigene0101732	-	206	3.5	2	0.01	2	2	hypothetical protein BRADI_1g78126 [Brachypodium distachyon]	-	-	-	-
	miR2092-x	Unigene0084128	At1g56140	279	4.5	4	0.002	1	1	PREDICTED: probable LRR receptor-like serine/threonine-protein kinase At1g56140 isoform X1 [Vitis vinifera]	-	-	GO:0097367//carbohydrate derivative binding;GO:0005488//binding;GO:0004672//protein kinase activity;GO:0036094//small molecule binding;GO:0016773//phosphotransferase activity, alcohol group as acceptor;GO:0004702//receptor signaling protein serine/threonine kinase activity;GO:0005057//receptor signaling protein activity;GO:0001883//purine nucleoside binding;GO:0032550//purine ribonucleoside bindi…	GO:0051246//regulation of protein metabolic process;GO:0042327//positive regulation of phosphorylation;GO:0009893//positive regulation of metabolic process;GO:0001934//positive regulation of protein phosphorylation;GO:0065007//biological regulation;GO:0045859//regulation of protein kinase activity;GO:0051347//positive regulation of transferase activity;GO:0019220//regulation of phosphate metaboli…
	miR2092-x	Unigene0080343	-	362	4.5	4	0.002	1	1	--	-	-	-	-
	miR2092-x	Unigene0056649	At4g32940	1462	4.5	2	0.01	6	6	PREDICTED: vacuolar-processing enzyme [Elaeis guineensis]	-	-	GO:0003824//catalytic activity;GO:0016787//hydrolase activity	GO:0019538//protein metabolic process;GO:0044238//primary metabolic process;GO:0071704//organic substance metabolic process;GO:0008152//metabolic process;GO:0043170//macromolecule metabolic process
	miR2092-x	Unigene0046142	TPI	212	4.5	2	0.01	14	7	PREDICTED: triosephosphate isomerase, chloroplastic [Juglans regia]	ko01100//Metabolic pathways//Global and Overview//Metabolism;ko01110//Biosynthesis of secondary metabolites//Global and Overview//Metabolism;ko01130//Biosynthesis of antibiotics//Global and Overview//Metabolism;ko01120//Microbial metabolism in diverse environments//Global and Overview//Metabolism;ko01200//Carbon metabolism//Global and Overview//Metabolism;ko01230//Biosynthesis of amino acids//Glo…	GO:0005622//intracellular;GO:0005576//extracellular region;GO:0031967//organelle envelope;GO:0043229//intracellular organelle;GO:0044422//organelle part;GO:0005737//cytoplasm;GO:0044444//cytoplasmic part;GO:0043227//membrane-bounded organelle;GO:0043231//intracellular membrane-bounded organelle;GO:0005623//cell;GO:0044446//intracellular organelle part;GO:0044424//intracellular part;GO:0044435//pl…	GO:0016853//isomerase activity;GO:0016861//intramolecular oxidoreductase activity, interconverting aldoses and ketoses;GO:0016860//intramolecular oxidoreductase activity;GO:0003824//catalytic activity	GO:0009072//aromatic amino acid family metabolic process;GO:0033036//macromolecule localization;GO:0044262//cellular carbohydrate metabolic process;GO:0044707//single-multicellular organism process;GO:1901566//organonitrogen compound biosynthetic process;GO:0006071//glycerol metabolic process;GO:0010817//regulation of hormone levels;GO:0022622//root system development;GO:0009628//response to abio…
	miR2092-x	Unigene0053036	ftsH	2548	4.5	4	0.002	1	0.5	PREDICTED: probable inactive ATP-dependent zinc metalloprotease FTSHI 1, chloroplastic [Nelumbo nucifera]	-	-	-	-
	miR2092-x	Unigene0019569	-	396	4.5	4	0.002	1	1	--	-	-	-	-
	miR2092-x	Unigene0035647	RHD3	438	4.5	2	0.01	6	6	PREDICTED: protein ROOT HAIR DEFECTIVE 3 [Elaeis guineensis]	-	GO:0005622//intracellular;GO:0031090//organelle membrane;GO:0005623//cell;GO:0044422//organelle part;GO:0044464//cell part;GO:0031224//intrinsic component of membrane;GO:0043231//intracellular membrane-bounded organelle;GO:0016020//membrane;GO:0044425//membrane part;GO:0043226//organelle;GO:0043227//membrane-bounded organelle;GO:0043229//intracellular organelle;GO:0044424//intracellular part	GO:0016818//hydrolase activity, acting on acid anhydrides, in phosphorus-containing anhydrides;GO:0001882//nucleoside binding;GO:0032550//purine ribonucleoside binding;GO:0003824//catalytic activity;GO:0032549//ribonucleoside binding;GO:1901363//heterocyclic compound binding;GO:0016817//hydrolase activity, acting on acid anhydrides;GO:0016462//pyrophosphatase activity;GO:0017111//nucleoside-triph…	-
	miR2092-x	Unigene0005272	At1g26850	1681	4.5	4	0.002	1	1	PREDICTED: probable methyltransferase PMT2 [Nelumbo nucifera]	-	-	-	-
	miR2092-x	Unigene0078338	-	243	4	4	0.002	1	1	--	-	-	-	-
	miR2092-x	Unigene0097380	-	940	4	4	0.002	1	1	Gap junction beta-4 protein isoform 1 [Theobroma cacao]	-	-	-	-
	miR2092-x	Unigene0074453	ABCI7	82	4.5	4	0.002	1	1	PREDICTED: protein ABCI7, chloroplastic [Daucus carota subsp. sativus] [Daucus carota]	-	GO:0005623//cell;GO:0043226//organelle;GO:0005737//cytoplasm;GO:0044424//intracellular part;GO:0044444//cytoplasmic part;GO:0043231//intracellular membrane-bounded organelle;GO:0005622//intracellular;GO:0043229//intracellular organelle;GO:0009536//plastid;GO:0044464//cell part;GO:0043227//membrane-bounded organelle	-	GO:0022414//reproductive process;GO:1901360//organic cyclic compound metabolic process;GO:0019222//regulation of metabolic process;GO:0009657//plastid organization;GO:0031323//regulation of cellular metabolic process;GO:0044699//single-organism process;GO:0044249//cellular biosynthetic process;GO:0044281//small molecule metabolic process;GO:0071840//cellular component organization or biogenesis;G…
	miR2092-x	Unigene0003394	-	364	4	4	0.002	1	1	--	-	-	-	-
	miR2092-x	Unigene0010426	SUPT6H	4515	4	2	0.01	3	3	PREDICTED: transcription elongation factor SPT6 homolog [Nelumbo nucifera]	-	-	-	GO:0051252//regulation of RNA metabolic process;GO:0019219//regulation of nucleobase-containing compound metabolic process;GO:0031326//regulation of cellular biosynthetic process;GO:2001141//regulation of RNA biosynthetic process;GO:0019222//regulation of metabolic process;GO:0050794//regulation of cellular process;GO:0065007//biological regulation;GO:0009889//regulation of biosynthetic process;G…
	miR2092-x	Unigene0049139	At3g26560	5285	4	4	0.002	1	1	PREDICTED: LOW QUALITY PROTEIN: ATP-dependent RNA helicase DEAH12, chloroplastic-like [Phoenix dactylifera]	ko03040//Spliceosome//Transcription//Genetic Information Processing	-	GO:0016817//hydrolase activity, acting on acid anhydrides;GO:0042623//ATPase activity, coupled;GO:0046872//metal ion binding;GO:0005488//binding;GO:0046914//transition metal ion binding;GO:0001883//purine nucleoside binding;GO:0032549//ribonucleoside binding;GO:0043169//cation binding;GO:0016787//hydrolase activity;GO:0003824//catalytic activity;GO:0016887//ATPase activity;GO:0036094//small molec…	-
	miR2092-x	Unigene0046141	TPIP1	807	4.5	2	0.01	14	7	PREDICTED: triosephosphate isomerase, chloroplastic isoform X1 [Nelumbo nucifera]	ko01100//Metabolic pathways//Global and Overview//Metabolism;ko01110//Biosynthesis of secondary metabolites//Global and Overview//Metabolism;ko01130//Biosynthesis of antibiotics//Global and Overview//Metabolism;ko01120//Microbial metabolism in diverse environments//Global and Overview//Metabolism;ko01200//Carbon metabolism//Global and Overview//Metabolism;ko01230//Biosynthesis of amino acids//Glo…	GO:0005576//extracellular region;GO:0044444//cytoplasmic part;GO:0044446//intracellular organelle part;GO:0009536//plastid;GO:0031975//envelope;GO:0005737//cytoplasm;GO:0005622//intracellular;GO:0044424//intracellular part;GO:0043226//organelle;GO:0043229//intracellular organelle;GO:0043227//membrane-bounded organelle;GO:0044422//organelle part;GO:0009532//plastid stroma;GO:0044435//plastid part;…	GO:0016853//isomerase activity;GO:0003824//catalytic activity;GO:0016861//intramolecular oxidoreductase activity, interconverting aldoses and ketoses;GO:0016860//intramolecular oxidoreductase activity	GO:0044711//single-organism biosynthetic process;GO:0006790//sulfur compound metabolic process;GO:0006796//phosphate-containing compound metabolic process;GO:0009628//response to abiotic stimulus;GO:0033036//macromolecule localization;GO:0009058//biosynthetic process;GO:0007275//multicellular organism development;GO:0000003//reproduction;GO:0099402//plant organ development;GO:0008152//metabolic p…
	miR2092-x	Unigene0062014	-	170	4	2	0.01	8	2.66667	PREDICTED: lysophospholipid acyltransferase LPEAT2-like [Arachis ipaensis]	ko01100//Metabolic pathways//Global and Overview//Metabolism;ko00564//Glycerophospholipid metabolism//Lipid metabolism//Metabolism;ko00565//Ether lipid metabolism//Lipid metabolism//Metabolism	-	-	-
	miR2092-x	Unigene0087956	-	947	4.5	2	0.01	6	6	PREDICTED: eukaryotic translation initiation factor 4B3-like [Nelumbo nucifera]	-	-	-	-
	miR2092-x	Unigene0063661	At3g22660	663	4	3	0.022	2	2	PREDICTED: probable rRNA-processing protein EBP2 homolog [Nelumbo nucifera]	-	GO:0044464//cell part;GO:0043226//organelle;GO:0043228//non-membrane-bounded organelle;GO:0043231//intracellular membrane-bounded organelle;GO:0044424//intracellular part;GO:0005623//cell;GO:0043232//intracellular non-membrane-bounded organelle;GO:0005622//intracellular;GO:0043227//membrane-bounded organelle;GO:0043229//intracellular organelle	-	GO:0071702//organic substance transport;GO:0051179//localization;GO:0045184//establishment of protein localization;GO:0006886//intracellular protein transport;GO:0044085//cellular component biogenesis;GO:0051234//establishment of localization;GO:0070727//cellular macromolecule localization;GO:0008104//protein localization;GO:1902578//single-organism localization;GO:0046907//intracellular transpor…
	miR2092-x	Unigene0002933	-	510	4.5	4	0.002	1	1	--	-	-	-	-
	miR2092-x	Unigene0024617	At2g44510	663	4.5	2	0.01	3	1.5	PREDICTED: protein BCCIP homolog isoform X1 [Nelumbo nucifera]	-	-	-	-
	miR2092-x	Unigene0083775	RDR1	1975	4	2	0.01	2	2	PREDICTED: probable RNA-dependent RNA polymerase 1 [Phoenix dactylifera]	-	-	-	-
	miR2092-x	Unigene0107845	CYP28	380	4	4	0.002	1	1	PREDICTED: peptidyl-prolyl cis-trans isomerase CYP28, chloroplastic [Jatropha curcas]	-	-	GO:0003824//catalytic activity;GO:0016853//isomerase activity;GO:0016859//cis-trans isomerase activity	GO:0044260//cellular macromolecule metabolic process;GO:0044237//cellular metabolic process;GO:0044238//primary metabolic process;GO:0071704//organic substance metabolic process;GO:0008152//metabolic process;GO:0043170//macromolecule metabolic process;GO:0044267//cellular protein metabolic process;GO:0019538//protein metabolic process;GO:0009987//cellular process
	miR2092-x	Unigene0041109	At1g07590	971	4.5	4	0.002	1	1	PREDICTED: pentatricopeptide repeat-containing protein At1g07590, mitochondrial isoform X1 [Nelumbo nucifera]	-	-	-	-
	miR2092-x	Unigene0049085	At3g50520	1237	4	2	0.01	2	2	PREDICTED: phosphoglycerate mutase-like protein 4 isoform X1 [Nelumbo nucifera]	ko01100//Metabolic pathways//Global and Overview//Metabolism;ko01110//Biosynthesis of secondary metabolites//Global and Overview//Metabolism;ko01130//Biosynthesis of antibiotics//Global and Overview//Metabolism;ko01120//Microbial metabolism in diverse environments//Global and Overview//Metabolism;ko01200//Carbon metabolism//Global and Overview//Metabolism;ko01230//Biosynthesis of amino acids//Glo…	-	-	-
	miR2092-x	Unigene0053195	CYCH1-1	862	4.5	4	0.002	1	1	PREDICTED: cyclin-H1-1 isoform X1 [Nelumbo nucifera]	ko03420//Nucleotide excision repair//Replication and repair//Genetic Information Processing;ko03022//Basal transcription factors//Transcription//Genetic Information Processing	GO:0005623//cell;GO:0005622//intracellular;GO:0044428//nuclear part;GO:0043229//intracellular organelle;GO:0044422//organelle part;GO:0005634//nucleus;GO:0044446//intracellular organelle part;GO:0044451//nucleoplasm part;GO:0043226//organelle;GO:0043231//intracellular membrane-bounded organelle;GO:0005654//nucleoplasm;GO:0044464//cell part;GO:0031981//nuclear lumen;GO:0043227//membrane-bounded or…	GO:0098772//molecular function regulator;GO:0005515//protein binding;GO:0019207//kinase regulator activity;GO:0019899//enzyme binding;GO:0016301//kinase activity;GO:0003824//catalytic activity;GO:0005488//binding;GO:0019900//kinase binding;GO:0016772//transferase activity, transferring phosphorus-containing groups;GO:0019887//protein kinase regulator activity;GO:0016740//transferase activity;GO:0…	GO:0016070//RNA metabolic process;GO:0001932//regulation of protein phosphorylation;GO:0009415//response to water;GO:0007275//multicellular organism development;GO:0050789//regulation of biological process;GO:0008380//RNA splicing;GO:0009058//biosynthetic process;GO:0010035//response to inorganic substance;GO:0080090//regulation of primary metabolic process;GO:0044699//single-organism process;GO:…
	miR2092-x	Unigene0083702	CCR1	406	4	2	0.01	3	3	Bifunctional dihydroflavonol 4-reductase/flavanone 4-reductase [Morus notabilis]	ko01100//Metabolic pathways//Global and Overview//Metabolism;ko01110//Biosynthesis of secondary metabolites//Global and Overview//Metabolism;ko00940//Phenylpropanoid biosynthesis//Biosynthesis of other secondary metabolites//Metabolism	-	GO:0048037//cofactor binding;GO:0005488//binding	-
	miR2092-x	Unigene0010188	CDF2	582	3.5	2	0.01	2	2	PREDICTED: cyclic dof factor 3-like [Nelumbo nucifera]	-	-	-	-
	miR2092-x	Unigene0064303	Wbscr22	286	3.5	4	0.002	1	0.5	S-adenosyl-L-methionine-dependent methyltransferases superfamily protein isoform 1 [Theobroma cacao]	-	GO:0043227//membrane-bounded organelle;GO:0044464//cell part;GO:0043232//intracellular non-membrane-bounded organelle;GO:0043229//intracellular organelle;GO:0005623//cell;GO:0005622//intracellular;GO:0043228//non-membrane-bounded organelle;GO:0043226//organelle;GO:0043231//intracellular membrane-bounded organelle;GO:0044424//intracellular part	GO:0003824//catalytic activity	GO:0016072//rRNA metabolic process;GO:0008152//metabolic process;GO:0016070//RNA metabolic process;GO:0006139//nucleobase-containing compound metabolic process;GO:0071704//organic substance metabolic process;GO:0034641//cellular nitrogen compound metabolic process;GO:0044237//cellular metabolic process;GO:0044260//cellular macromolecule metabolic process;GO:0090304//nucleic acid metabolic process…
	miR2092-x	Unigene0023641	-	380	4	4	0.002	1	0.5	--	-	-	-	-
	miR2092-x	Unigene0058922	CIP8	776	4	4	0.002	1	1	PREDICTED: E3 ubiquitin-protein ligase CIP8 [Citrus sinensis]	-	-	-	-
	miR2092-x	Unigene0010079	At3g59480	2073	3.5	4	0.002	1	1	PREDICTED: fructokinase-1-like [Populus euphratica]	-	GO:0044464//cell part;GO:0044424//intracellular part;GO:0005622//intracellular;GO:0005623//cell	GO:0016772//transferase activity, transferring phosphorus-containing groups;GO:0016740//transferase activity;GO:0003824//catalytic activity	GO:0009987//cellular process;GO:0044237//cellular metabolic process;GO:0008152//metabolic process;GO:0006796//phosphate-containing compound metabolic process;GO:0006793//phosphorus metabolic process
	miR2092-x	Unigene0103999	DIVARICATA	607	3.5	4	0.002	1	1	PREDICTED: transcription factor DIVARICATA [Nelumbo nucifera]	-	-	-	-
	miR2092-x	Unigene0052777	SOD	433	4	2	0.01	8	8	PREDICTED: superoxide dismutase [Mn], mitochondrial [Gossypium hirsutum]	ko04146//Peroxisome//Transport and catabolism//Cellular Processes	-	GO:0043167//ion binding;GO:0043169//cation binding;GO:0003824//catalytic activity;GO:0005488//binding	GO:0009987//cellular process;GO:0044237//cellular metabolic process;GO:0072593//reactive oxygen species metabolic process;GO:0044710//single-organism metabolic process;GO:0006801//superoxide metabolic process;GO:0008152//metabolic process;GO:0044699//single-organism process
	miR2092-x	Unigene0056422	At1g67280	1276	4.5	2	0.01	3	3	PREDICTED: probable lactoylglutathione lyase, chloroplastic [Nelumbo nucifera]	ko00620//Pyruvate metabolism//Carbohydrate metabolism//Metabolism	-	-	-
	miR2092-x	Unigene0069256	NAT6	719	4.5	4	0.002	1	1	PREDICTED: LOW QUALITY PROTEIN: nucleobase-ascorbate transporter 6 [Elaeis guineensis]	-	-	-	-
	miR2092-x	Unigene0069181	BGAL16	1195	4	2	0.01	4	4	PREDICTED: beta-galactosidase 16 isoform X2 [Nelumbo nucifera]	-	GO:0005576//extracellular region	GO:0016798//hydrolase activity, acting on glycosyl bonds;GO:0004553//hydrolase activity, hydrolyzing O-glycosyl compounds;GO:0016787//hydrolase activity;GO:0003824//catalytic activity	GO:0008152//metabolic process
	miR2092-x	Unigene0100663	rps5	275	4	2	0.01	12	12	PREDICTED: 30S ribosomal protein S5, chloroplastic [Nelumbo nucifera]	ko03010//Ribosome//Translation//Genetic Information Processing	GO:0005737//cytoplasm;GO:0032991//macromolecular complex;GO:0044446//intracellular organelle part;GO:0044464//cell part;GO:0005623//cell;GO:0030529//intracellular ribonucleoprotein complex;GO:0009507//chloroplast;GO:0031976//plastid thylakoid;GO:0043228//non-membrane-bounded organelle;GO:0044444//cytoplasmic part;GO:0009536//plastid;GO:0031984//organelle subcompartment;GO:0043232//intracellular n…	-	-
	miR2092-x	Unigene0059377	-	885	4.5	2	0.01	2	1	PREDICTED: CTL-like protein DDB_G0274487 [Elaeis guineensis]	-	GO:0016020//membrane;GO:0044425//membrane part;GO:0031224//intrinsic component of membrane	-	GO:0043436//oxoacid metabolic process;GO:0008652//cellular amino acid biosynthetic process;GO:0044238//primary metabolic process;GO:0044711//single-organism biosynthetic process;GO:0044249//cellular biosynthetic process;GO:0044281//small molecule metabolic process;GO:0000096//sulfur amino acid metabolic process;GO:0044710//single-organism metabolic process;GO:0016053//organic acid biosynthetic pr…
	miR2092-x	Unigene0057617	At4g17486	688	4.5	4	0.002	1	1	PREDICTED: deSI-like protein At4g17486 [Vitis vinifera]	-	-	-	-
	miR2092-x	Unigene0018597	CLV1	1931	3.5	4	0.002	1	1	PREDICTED: receptor protein kinase CLAVATA1 [Vitis vinifera]	-	GO:0016020//membrane	GO:0016740//transferase activity;GO:0004672//protein kinase activity;GO:0005515//protein binding;GO:0005057//receptor signaling protein activity;GO:0016772//transferase activity, transferring phosphorus-containing groups;GO:0016301//kinase activity;GO:0004702//receptor signaling protein serine/threonine kinase activity;GO:0016491//oxidoreductase activity;GO:0003824//catalytic activity;GO:0004871/…	GO:0016310//phosphorylation;GO:0007154//cell communication;GO:0065007//biological regulation;GO:0044767//single-organism developmental process;GO:0019538//protein metabolic process;GO:0006464//cellular protein modification process;GO:0050896//response to stimulus;GO:0006793//phosphorus metabolic process;GO:0071704//organic substance metabolic process;GO:0044267//cellular protein metabolic process…
	miR2092-x	Unigene0014160	AAE1	1713	4.5	4	0.002	1	1	PREDICTED: probable acyl-activating enzyme 1, peroxisomal isoform X1 [Vitis vinifera]	-	-	GO:0016874//ligase activity;GO:0016877//ligase activity, forming carbon-sulfur bonds;GO:0016405//CoA-ligase activity;GO:0003824//catalytic activity	-
	miR2092-x	Unigene0060075	ARP	404	4	2	0.01	5	5	PREDICTED: DNA-(apurinic or apyrimidinic site) lyase, chloroplastic isoform X1 [Nelumbo nucifera]	ko03410//Base excision repair//Replication and repair//Genetic Information Processing	-	-	-
	miR2092-x	Unigene0059124	RPOT3	1461	4.5	4	0.002	1	1	PREDICTED: DNA-directed RNA polymerase 3, chloroplastic isoform X2 [Nelumbo nucifera]	-	GO:0043226//organelle;GO:0043229//intracellular organelle;GO:0044444//cytoplasmic part;GO:0044424//intracellular part;GO:0005737//cytoplasm;GO:0043227//membrane-bounded organelle;GO:0044464//cell part;GO:0009536//plastid;GO:0005622//intracellular;GO:0043231//intracellular membrane-bounded organelle;GO:0005623//cell	GO:0016779//nucleotidyltransferase activity;GO:0003824//catalytic activity;GO:0016740//transferase activity;GO:0016772//transferase activity, transferring phosphorus-containing groups	-
	miR2092-x	Unigene0111149	Os05g0558800	1976	4.5	2	0.01	3	3	PREDICTED: ninja-family protein mc410 [Nelumbo nucifera]	-	-	-	-
	miR2092-x	Unigene0057480	FTSH12	2011	4.5	2	0.01	2	2	PREDICTED: ATP-dependent zinc metalloprotease FTSH 12, chloroplastic [Nelumbo nucifera]	-	GO:0043229//intracellular organelle;GO:0009507//chloroplast;GO:0009536//plastid;GO:0044446//intracellular organelle part;GO:0016020//membrane;GO:0043231//intracellular membrane-bounded organelle;GO:0044422//organelle part;GO:0005622//intracellular;GO:0031967//organelle envelope;GO:0031224//intrinsic component of membrane;GO:0044434//chloroplast part;GO:0044464//cell part;GO:0044424//intracellular…	GO:0017111//nucleoside-triphosphatase activity;GO:0001882//nucleoside binding;GO:0001883//purine nucleoside binding;GO:0003824//catalytic activity;GO:0097159//organic cyclic compound binding;GO:0070011//peptidase activity, acting on L-amino acid peptides;GO:0043167//ion binding;GO:0016817//hydrolase activity, acting on acid anhydrides;GO:1901363//heterocyclic compound binding;GO:0032550//purine r…	GO:0009987//cellular process;GO:1901575//organic substance catabolic process;GO:0022414//reproductive process;GO:0044267//cellular protein metabolic process;GO:0016043//cellular component organization;GO:0009057//macromolecule catabolic process;GO:0030163//protein catabolic process;GO:0044257//cellular protein catabolic process;GO:0006996//organelle organization;GO:0008152//metabolic process;GO:0…
	miR2092-x	Unigene0025358	-	433	4.5	4	0.002	1	1	hypothetical protein POPTR_0005s11710g [Populus trichocarpa]	-	-	-	-
	miR2092-x	Unigene0046977	Os03g0268000	1533	4	4	0.002	1	1	PREDICTED: serine/threonine-protein phosphatase PP1 [Amborella trichopoda]	ko03015//mRNA surveillance pathway//Translation//Genetic Information Processing	-	GO:0003824//catalytic activity	GO:0008152//metabolic process;GO:0044237//cellular metabolic process;GO:0009987//cellular process;GO:0006796//phosphate-containing compound metabolic process;GO:0006793//phosphorus metabolic process
	miR2092-x	Unigene0070263	KAS2	546	4.5	4	0.002	1	1	PREDICTED: 3-oxoacyl-[acyl-carrier-protein] synthase II, chloroplastic-like isoform X2 [Nelumbo nucifera]	ko01100//Metabolic pathways//Global and Overview//Metabolism;ko01212//Fatty acid metabolism//Global and Overview//Metabolism;ko00061//Fatty acid biosynthesis//Lipid metabolism//Metabolism;ko00780//Biotin metabolism//Metabolism of cofactors and vitamins//Metabolism	-	GO:0016746//transferase activity, transferring acyl groups;GO:0003824//catalytic activity;GO:0016740//transferase activity	GO:0043436//oxoacid metabolic process;GO:0032787//monocarboxylic acid metabolic process;GO:0019752//carboxylic acid metabolic process;GO:0044237//cellular metabolic process;GO:0044699//single-organism process;GO:0044281//small molecule metabolic process;GO:0009987//cellular process;GO:0006629//lipid metabolic process;GO:0044710//single-organism metabolic process;GO:0044763//single-organism cellul…
	miR2092-x	Unigene0012721	PAL	1042	4	4	0.002	1	1	PREDICTED: phenylalanine ammonia-lyase-like [Nelumbo nucifera]	ko01100//Metabolic pathways//Global and Overview//Metabolism;ko01110//Biosynthesis of secondary metabolites//Global and Overview//Metabolism;ko00940//Phenylpropanoid biosynthesis//Biosynthesis of other secondary metabolites//Metabolism;ko00360//Phenylalanine metabolism//Amino acid metabolism//Metabolism	-	-	-
	miR2092-x	Unigene0039685	At4g17486	430	4.5	2	0.01	2	1	PREDICTED: deSI-like protein At4g17486 [Vitis vinifera]	-	-	-	-
	miR2092-x	Unigene0026379	RAN-B1	1549	4	4	0.002	1	1	BnaC02g13240D [Brassica napus]	ko03013//RNA transport//Translation//Genetic Information Processing;ko03008//Ribosome biogenesis in eukaryotes//Translation//Genetic Information Processing	-	GO:0016462//pyrophosphatase activity;GO:0016787//hydrolase activity;GO:0017111//nucleoside-triphosphatase activity;GO:0032550//purine ribonucleoside binding;GO:0016818//hydrolase activity, acting on acid anhydrides, in phosphorus-containing anhydrides;GO:0001882//nucleoside binding;GO:0016817//hydrolase activity, acting on acid anhydrides;GO:0001883//purine nucleoside binding;GO:0097159//organic …	GO:0044763//single-organism cellular process;GO:0051641//cellular localization;GO:0007165//signal transduction;GO:0046907//intracellular transport;GO:0051234//establishment of localization;GO:0033036//macromolecule localization;GO:0044700//single organism signaling;GO:0051649//establishment of localization in cell;GO:0065007//biological regulation;GO:0051179//localization;GO:0007154//cell communi…
	miR2092-x	Unigene0021919	-	193	4	2	0.01	3	3	PREDICTED: transmembrane protein 33 homolog [Juglans regia]	-	GO:0044425//membrane part;GO:0005911//cell-cell junction;GO:0016020//membrane;GO:0043231//intracellular membrane-bounded organelle;GO:0031224//intrinsic component of membrane;GO:0044464//cell part;GO:0043229//intracellular organelle;GO:0005623//cell;GO:0005622//intracellular;GO:0030054//cell junction;GO:0043227//membrane-bounded organelle;GO:0043226//organelle;GO:0044424//intracellular part	-	-
	miR2092-x	Unigene0084910	Os06g0701100	989	4.5	3	0.022	2	2	PREDICTED: eukaryotic initiation factor 4A-15-like [Juglans regia]	ko03013//RNA transport//Translation//Genetic Information Processing	-	-	-
	miR2092-x	Unigene0007850	TAF15B	708	4.5	2	0.01	7	7	PREDICTED: transcription initiation factor TFIID subunit 15b-like isoform X1 [Glycine max]	-	-	-	-
	miR2092-x	Unigene0033406	ACCB-1	771	3.5	2	0.01	10	10	biotin carboxyl carrier protein [Persea americana]	ko01100//Metabolic pathways//Global and Overview//Metabolism;ko01110//Biosynthesis of secondary metabolites//Global and Overview//Metabolism;ko01130//Biosynthesis of antibiotics//Global and Overview//Metabolism;ko01120//Microbial metabolism in diverse environments//Global and Overview//Metabolism;ko01200//Carbon metabolism//Global and Overview//Metabolism;ko00620//Pyruvate metabolism//Carbohydrat…	-	-	-
	miR2092-x	Unigene0007647	PCKA	1449	4.5	2	0.01	4	4	PREDICTED: phosphoenolpyruvate carboxykinase [ATP]-like [Juglans regia]	ko01100//Metabolic pathways//Global and Overview//Metabolism;ko01110//Biosynthesis of secondary metabolites//Global and Overview//Metabolism;ko01130//Biosynthesis of antibiotics//Global and Overview//Metabolism;ko01120//Microbial metabolism in diverse environments//Global and Overview//Metabolism;ko01200//Carbon metabolism//Global and Overview//Metabolism;ko00010//Glycolysis / Gluconeogenesis//Ca…	-	-	-
	miR2092-x	Unigene0058815	P4H4	205	4.5	2	0.01	3	3	PREDICTED: probable prolyl 4-hydroxylase 4 [Nelumbo nucifera]	ko01100//Metabolic pathways//Global and Overview//Metabolism;ko00330//Arginine and proline metabolism//Amino acid metabolism//Metabolism	-	GO:0019842//vitamin binding;GO:0016491//oxidoreductase activity;GO:0046914//transition metal ion binding;GO:0046872//metal ion binding;GO:0003824//catalytic activity;GO:0016705//oxidoreductase activity, acting on paired donors, with incorporation or reduction of molecular oxygen;GO:0036094//small molecule binding;GO:0005488//binding;GO:0043169//cation binding;GO:0043167//ion binding	GO:0044267//cellular protein metabolic process;GO:0044237//cellular metabolic process;GO:0044710//single-organism metabolic process;GO:0008152//metabolic process;GO:0071704//organic substance metabolic process;GO:0006464//cellular protein modification process;GO:0019538//protein metabolic process;GO:0044699//single-organism process;GO:0043170//macromolecule metabolic process;GO:0043412//macromole…
	miR2092-x	Unigene0006093	-	1081	4.5	4	0.002	1	0.5	reverse transcriptase [Corchorus capsularis]	-	-	-	-
	miR2092-x	Unigene0031985	-	771	4.5	4	0.002	1	0.5	PREDICTED: N-alpha-acetyltransferase 16, NatA auxiliary subunit-like isoform X2 [Elaeis guineensis]	-	-	-	-
	miR2092-x	Unigene0108008	gpatch11	283	4.5	4	0.002	1	1	PREDICTED: G patch domain-containing protein 11 [Nelumbo nucifera]	-	-	-	-
	miR2092-x	Unigene0081554	bbp-1	323	4	2	0.01	2	2	PREDICTED: splicing factor 1 [Nelumbo nucifera]	-	-	GO:0003676//nucleic acid binding;GO:0005488//binding;GO:0097159//organic cyclic compound binding;GO:1901363//heterocyclic compound binding	-
	miR2092-x	Unigene0023774	ABCF5	648	4.5	4	0.002	1	0.5	PREDICTED: ABC transporter F family member 5-like [Phoenix dactylifera]	-	-	-	-
	miR2092-x	Unigene0065520	BAM9	2015	3	3	0.022	2	2	PREDICTED: inactive beta-amylase 9-like [Nelumbo nucifera]	-	-	GO:0003824//catalytic activity;GO:0016787//hydrolase activity	-
	miR2092-x	Unigene0066140	Cag_1601	2346	3.5	2	0.01	2	2	PREDICTED: UPF0301 protein Cpha266_0885 [Citrus sinensis]	-	-	-	-
	miR2092-x	Unigene0076099	VIII-1	492	4.5	2	0.01	2	2	PREDICTED: myosin-1-like [Nelumbo nucifera]	-	GO:0043229//intracellular organelle;GO:0044424//intracellular part;GO:0005622//intracellular;GO:0043232//intracellular non-membrane-bounded organelle;GO:0005856//cytoskeleton;GO:0043228//non-membrane-bounded organelle;GO:0005623//cell;GO:0043226//organelle;GO:0015629//actin cytoskeleton;GO:0044464//cell part	GO:0005488//binding;GO:1901363//heterocyclic compound binding;GO:0097159//organic cyclic compound binding;GO:0032549//ribonucleoside binding;GO:0016462//pyrophosphatase activity;GO:0016818//hydrolase activity, acting on acid anhydrides, in phosphorus-containing anhydrides;GO:0001883//purine nucleoside binding;GO:0097367//carbohydrate derivative binding;GO:0032550//purine ribonucleoside binding;GO…	-
	miR2092-x	Unigene0103960	SRF8	1345	4.5	4	0.002	1	1	PREDICTED: protein STRUBBELIG-RECEPTOR FAMILY 8-like isoform X1 [Nelumbo nucifera]	-	GO:0016020//membrane;GO:0031224//intrinsic component of membrane;GO:0044425//membrane part	GO:0032550//purine ribonucleoside binding;GO:0005488//binding;GO:0097367//carbohydrate derivative binding;GO:1901363//heterocyclic compound binding;GO:0003824//catalytic activity;GO:0032549//ribonucleoside binding;GO:0001882//nucleoside binding;GO:0097159//organic cyclic compound binding;GO:0001883//purine nucleoside binding;GO:0036094//small molecule binding;GO:0016740//transferase activity	GO:0044237//cellular metabolic process;GO:0008152//metabolic process;GO:0019538//protein metabolic process;GO:0044267//cellular protein metabolic process;GO:0044238//primary metabolic process;GO:0009987//cellular process;GO:0036211//protein modification process;GO:0044260//cellular macromolecule metabolic process;GO:0071704//organic substance metabolic process;GO:0043170//macromolecule metabolic …
	miR2092-x	Unigene0065472	-	2260	4.5	4	0.002	1	1	PREDICTED: peptidyl-prolyl cis-trans isomerase G [Cucumis sativus]	-	-	-	GO:0044702//single organism reproductive process;GO:0032502//developmental process;GO:0045491//xylan metabolic process;GO:0048856//anatomical structure development;GO:0048285//organelle fission;GO:0006807//nitrogen compound metabolic process;GO:0044710//single-organism metabolic process;GO:0060249//anatomical structure homeostasis;GO:1901360//organic cyclic compound metabolic process;GO:0000723//…
	miR2092-x	Unigene0077828	TUBGCP6	3658	4.5	4	0.002	1	1	Gamma-tubulin complex component 6, partial [Anthurium amnicola]	-	-	-	-
	miR2092-x	Unigene0057467	At1g30570	869	4.5	4	0.002	1	1	Kinase superfamily protein isoform 2 [Theobroma cacao]	-	-	GO:0036094//small molecule binding;GO:0005488//binding;GO:0032550//purine ribonucleoside binding;GO:0097159//organic cyclic compound binding;GO:0016772//transferase activity, transferring phosphorus-containing groups;GO:0032549//ribonucleoside binding;GO:0016740//transferase activity;GO:0003824//catalytic activity;GO:0097367//carbohydrate derivative binding;GO:1901363//heterocyclic compound bindi…	GO:0044260//cellular macromolecule metabolic process;GO:0009987//cellular process;GO:0006796//phosphate-containing compound metabolic process;GO:0071704//organic substance metabolic process;GO:0044267//cellular protein metabolic process;GO:0044238//primary metabolic process;GO:0036211//protein modification process;GO:0043170//macromolecule metabolic process;GO:0006793//phosphorus metabolic proces…
	miR2092-x	Unigene0006093	-	1214	4.5	4	0.002	1	0.5	reverse transcriptase [Corchorus capsularis]	-	-	-	-
	miR2092-x	Unigene0064305	Wbscr22	286	3.5	4	0.002	1	0.5	S-adenosyl-L-methionine-dependent methyltransferase superfamily protein [Zea mays]	-	-	-	-
	miR2092-x	Unigene0056585	-	865	4.5	4	0.002	1	0.5	2OG-FeII_Oxy domain-containing protein/DIOX_N domain-containing protein [Cephalotus follicularis]	-	-	-	-
	miR2092-x	Unigene0062960	At1g55630	867	4.5	4	0.002	1	1	PREDICTED: pentatricopeptide repeat-containing protein At3g60050-like [Nelumbo nucifera]	-	-	-	-
	miR2092-x	Unigene0077941	HATB	1158	3.5	2	0.01	3	3	PREDICTED: probable histone acetyltransferase type B catalytic subunit [Elaeis guineensis]	-	-	-	GO:0009987//cellular process
	miR2092-x	Unigene0096259	TSC10A	669	4.5	4	0.002	1	1	PREDICTED: 3-dehydrosphinganine reductase TSC10A [Nelumbo nucifera]	ko01100//Metabolic pathways//Global and Overview//Metabolism;ko00600//Sphingolipid metabolism//Lipid metabolism//Metabolism	-	GO:0003824//catalytic activity	GO:0008152//metabolic process;GO:0044699//single-organism process;GO:0044710//single-organism metabolic process
	miR2092-x	Unigene0030385	At1g06030	1003	4.5	4	0.002	1	1	fructokinase [Actinidia chinensis]	ko01100//Metabolic pathways//Global and Overview//Metabolism;ko00500//Starch and sucrose metabolism//Carbohydrate metabolism//Metabolism;ko00520//Amino sugar and nucleotide sugar metabolism//Carbohydrate metabolism//Metabolism;ko00051//Fructose and mannose metabolism//Carbohydrate metabolism//Metabolism	-	-	-
	miR2092-x	Unigene0008806	-	891	4	4	0.002	1	1	PREDICTED: remorin-like [Citrus sinensis]	-	-	-	-
	miR2092-x	Unigene0000445	At4g17486	430	4.5	2	0.01	2	1	PREDICTED: deSI-like protein At4g17486 [Vitis vinifera]	-	-	-	-
	miR2092-x	Unigene0006889	-	1779	4.5	4	0.002	1	1	--	-	-	-	-
	miR2092-x	Unigene0058366	-	1133	4.5	4	0.002	1	1	--	-	-	-	-
	miR2092-x	Unigene0073469	PP2B10	1660	4	2	0.01	2	2	PREDICTED: F-box protein PP2-B15-like [Nelumbo nucifera]	-	-	-	-
	miR2092-x	Unigene0007860	LACE1	1455	3.5	4	0.002	1	1	PREDICTED: lactation elevated protein 1-like isoform X1 [Nelumbo nucifera]	-	-	-	-
	miR2092-x	Unigene0004962	-	225	3.5	2	0.01	2	1	octicosapeptide/Phox/Bem1p domain-containing family protein [Populus trichocarpa]	-	-	-	-
	miR2092-x	Unigene0111819	RPE	773	2.5	2	0.01	2	2	PREDICTED: ribulose-phosphate 3-epimerase, chloroplastic [Nelumbo nucifera]	ko01100//Metabolic pathways//Global and Overview//Metabolism;ko01110//Biosynthesis of secondary metabolites//Global and Overview//Metabolism;ko01130//Biosynthesis of antibiotics//Global and Overview//Metabolism;ko01120//Microbial metabolism in diverse environments//Global and Overview//Metabolism;ko01200//Carbon metabolism//Global and Overview//Metabolism;ko01230//Biosynthesis of amino acids//Glo…	GO:0031967//organelle envelope;GO:0005622//intracellular;GO:0005623//cell;GO:0043226//organelle;GO:0043229//intracellular organelle;GO:0005737//cytoplasm;GO:0009532//plastid stroma;GO:0009536//plastid;GO:0043231//intracellular membrane-bounded organelle;GO:0044435//plastid part;GO:0044422//organelle part;GO:0043227//membrane-bounded organelle;GO:0044444//cytoplasmic part;GO:0009526//plastid envel…	GO:0016857//racemase and epimerase activity, acting on carbohydrates and derivatives;GO:0016854//racemase and epimerase activity;GO:0043169//cation binding;GO:0043167//ion binding;GO:0005488//binding;GO:0003824//catalytic activity;GO:0016853//isomerase activity	GO:0006739//NADP metabolic process;GO:0044237//cellular metabolic process;GO:0006807//nitrogen compound metabolic process;GO:0006733//oxidoreduction coenzyme metabolic process;GO:0071704//organic substance metabolic process;GO:1901360//organic cyclic compound metabolic process;GO:0009617//response to bacterium;GO:1901564//organonitrogen compound metabolic process;GO:0051186//cofactor metabolic pr…
	miR2092-x	Unigene0031119	GSTF9	130	4.5	4	0.002	1	1	glutathione S-transferase [Chimonanthus praecox]	ko00480//Glutathione metabolism//Metabolism of other amino acids//Metabolism	-	GO:0003824//catalytic activity	-
	miR2092-x	Unigene0022658	ALS	629	4	4	0.002	1	1	PREDICTED: acetolactate synthase 3, chloroplastic [Ricinus communis]	ko01100//Metabolic pathways//Global and Overview//Metabolism;ko01110//Biosynthesis of secondary metabolites//Global and Overview//Metabolism;ko01130//Biosynthesis of antibiotics//Global and Overview//Metabolism;ko01230//Biosynthesis of amino acids//Global and Overview//Metabolism;ko01210//2-Oxocarboxylic acid metabolism//Global and Overview//Metabolism;ko00770//Pantothenate and CoA biosynthesis//…	GO:0044444//cytoplasmic part;GO:0043226//organelle;GO:0005622//intracellular;GO:0043229//intracellular organelle;GO:0005737//cytoplasm;GO:0005623//cell;GO:0044446//intracellular organelle part;GO:0009536//plastid;GO:0009532//plastid stroma;GO:0044435//plastid part;GO:0044424//intracellular part;GO:0044464//cell part;GO:0044422//organelle part;GO:0043231//intracellular membrane-bounded organelle;G…	GO:0036094//small molecule binding;GO:0043169//cation binding;GO:1901363//heterocyclic compound binding;GO:1901265//nucleoside phosphate binding;GO:0016740//transferase activity;GO:0000166//nucleotide binding;GO:0097159//organic cyclic compound binding;GO:0003824//catalytic activity;GO:0005488//binding;GO:0043167//ion binding;GO:0016744//transferase activity, transferring aldehyde or ketonic grou…	GO:0006950//response to stress;GO:0006807//nitrogen compound metabolic process;GO:0006082//organic acid metabolic process;GO:0016053//organic acid biosynthetic process;GO:0046394//carboxylic acid biosynthetic process;GO:0044281//small molecule metabolic process;GO:1901576//organic substance biosynthetic process;GO:0006573//valine metabolic process;GO:0044711//single-organism biosynthetic process;…
	miR2092-x	Unigene0070514	TENA_E	412	3.5	4	0.002	1	1	Seed maturation protein PM36, partial [Anthurium amnicola]	-	-	-	-
	miR2092-x	Unigene0066055	EMB175	1381	4.5	4	0.002	1	1	PREDICTED: pentatricopeptide repeat-containing protein At5g03800 [Elaeis guineensis]	-	-	-	-
	miR2092-x	Unigene0023640	-	380	4	4	0.002	1	0.5	--	-	-	-	-
	miR2092-x	Unigene0056689	UKL3	749	4.5	2	0.01	2	2	PREDICTED: uridine kinase-like protein 3 [Vitis vinifera]	ko01100//Metabolic pathways//Global and Overview//Metabolism;ko00240//Pyrimidine metabolism//Nucleotide metabolism//Metabolism	-	GO:0019205//nucleobase-containing compound kinase activity;GO:0032549//ribonucleoside binding;GO:0036094//small molecule binding;GO:0005488//binding;GO:1901363//heterocyclic compound binding;GO:0097367//carbohydrate derivative binding;GO:0001883//purine nucleoside binding;GO:0019206//nucleoside kinase activity;GO:0001882//nucleoside binding;GO:0097159//organic cyclic compound binding;GO:0016772//…	GO:0009259//ribonucleotide metabolic process;GO:0044238//primary metabolic process;GO:0009123//nucleoside monophosphate metabolic process;GO:0019693//ribose phosphate metabolic process;GO:1901564//organonitrogen compound metabolic process;GO:0009209//pyrimidine ribonucleoside triphosphate biosynthetic process;GO:0009147//pyrimidine nucleoside triphosphate metabolic process;GO:0046134//pyrimidine …
	miR2092-x	Unigene0031984	NAA16	2689	4.5	4	0.002	1	0.5	PREDICTED: N-alpha-acetyltransferase 15, NatA auxiliary subunit isoform X1 [Vitis vinifera]	-	-	GO:0003824//catalytic activity	-
	miR2092-x	Unigene0016267	DHAR2	298	4.5	2	0.01	2	2	PREDICTED: glutathione S-transferase DHAR2 [Amborella trichopoda]	-	-	-	-
	miR2092-x	Unigene0041329	At2g17670	1211	3.5	2	0.01	2	2	PREDICTED: pentatricopeptide repeat-containing protein At2g17670 [Nelumbo nucifera]	-	-	-	-
	miR2092-x	Unigene0059379	DDB_G0274487	338	4	4	0.002	1	1	Choline_transpo domain-containing protein [Cephalotus follicularis]	-	-	-	-
	miR2092-x	Unigene0005891	-	1283	4.5	4	0.002	1	1	--	-	-	-	-
	miR2092-x	Unigene0063023	BSL1	377	4.5	4	0.002	1	0.5	Calcineurin-like metallo-phosphoesterase superfamily protein [Zea mays]	-	-	-	-
	miR2092-x	Unigene0062452	SLC25A16	1437	4	4	0.002	1	1	PREDICTED: mitochondrial substrate carrier family protein P-like [Nelumbo nucifera]	-	GO:0031224//intrinsic component of membrane;GO:0044425//membrane part;GO:0016020//membrane	-	GO:0044699//single-organism process;GO:0044763//single-organism cellular process;GO:0009987//cellular process
	miR2092-x	Unigene0057746	AGL61	207	4.5	4	0.002	1	1	PREDICTED: agamous-like MADS-box protein AGL29 [Lupinus angustifolius]	-	-	-	-
	miR2092-x	Unigene0078896	-	1681	4.5	4	0.002	1	1	PREDICTED: uncharacterized protein LOC104598255 [Nelumbo nucifera]	-	-	-	-
	miR2092-x	Unigene0057576	-	1179	4.5	4	0.002	1	1	DUF4283 domain-containing protein, partial [Cephalotus follicularis]	-	-	-	-
	miR2092-x	Unigene0057630	Os03g0130400	2041	4.5	4	0.002	1	1	PREDICTED: LOW QUALITY PROTEIN: probable adenylate kinase 6, chloroplastic [Phoenix dactylifera]	ko01100//Metabolic pathways//Global and Overview//Metabolism;ko01110//Biosynthesis of secondary metabolites//Global and Overview//Metabolism;ko01130//Biosynthesis of antibiotics//Global and Overview//Metabolism;ko00230//Purine metabolism//Nucleotide metabolism//Metabolism	-	GO:0016301//kinase activity;GO:0032549//ribonucleoside binding;GO:0016772//transferase activity, transferring phosphorus-containing groups;GO:0016740//transferase activity;GO:0032550//purine ribonucleoside binding;GO:0036094//small molecule binding;GO:0003824//catalytic activity;GO:0005488//binding;GO:1901363//heterocyclic compound binding;GO:0019205//nucleobase-containing compound kinase activit…	GO:0019637//organophosphate metabolic process;GO:0008152//metabolic process;GO:0034641//cellular nitrogen compound metabolic process;GO:0044238//primary metabolic process;GO:0055086//nucleobase-containing small molecule metabolic process;GO:0006139//nucleobase-containing compound metabolic process;GO:0006793//phosphorus metabolic process;GO:0044699//single-organism process;GO:0009117//nucleotide …
	miR2092-x	Unigene0004962	-	630	4.5	4	0.002	1	1	octicosapeptide/Phox/Bem1p domain-containing family protein [Populus trichocarpa]	-	-	-	-
	miR2092-x	Unigene0060726	-	58	4.5	4	0.002	1	1	PREDICTED: switch-associated protein 70 isoform X1 [Nelumbo nucifera]	-	GO:0044464//cell part;GO:0030312//external encapsulating structure;GO:0071944//cell periphery;GO:0005623//cell;GO:0005618//cell wall	-	-
	miR2092-x	Unigene0050158	ELD1	1309	4.5	4	0.002	1	0.5	PREDICTED: glycosyltransferase-like At2g41451 [Nelumbo nucifera]	-	-	-	-
	miR2092-x	Unigene0017629	CHS	304	4.5	3	0.022	4	4	Chal_sti_synt_N domain-containing protein/Chal_sti_synt_C domain-containing protein [Cephalotus follicularis]	ko01100//Metabolic pathways//Global and Overview//Metabolism;ko01110//Biosynthesis of secondary metabolites//Global and Overview//Metabolism;ko04712//Circadian rhythm - plant//Environmental adaptation//Organismal Systems;ko00941//Flavonoid biosynthesis//Biosynthesis of other secondary metabolites//Metabolism	-	GO:0016740//transferase activity;GO:0016746//transferase activity, transferring acyl groups;GO:0016747//transferase activity, transferring acyl groups other than amino-acyl groups;GO:0003824//catalytic activity	GO:0008152//metabolic process;GO:0009812//flavonoid metabolic process;GO:0071704//organic substance metabolic process
	miR2092-x	Unigene0100675	CCDC25	2233	3.5	2	0.01	4	4	PREDICTED: coiled-coil domain-containing protein 25 [Amborella trichopoda]	-	-	-	GO:0006810//transport;GO:0051234//establishment of localization;GO:0051179//localization
	miR2092-x	Unigene0045890	F6'H2	1197	3.5	4	0.002	1	1	PREDICTED: protein DMR6-LIKE OXYGENASE 1-like [Nelumbo nucifera]	-	-	GO:0043167//ion binding;GO:0043169//cation binding;GO:0005488//binding;GO:0016491//oxidoreductase activity;GO:0016705//oxidoreductase activity, acting on paired donors, with incorporation or reduction of molecular oxygen;GO:0003824//catalytic activity	GO:0008152//metabolic process;GO:0044699//single-organism process;GO:0044710//single-organism metabolic process
	miR2092-x	Unigene0093435	-	356	4	4	0.002	1	1	PREDICTED: probable inactive serine/threonine-protein kinase slob1 isoform X1 [Ziziphus jujuba]	-	-	-	-
	miR2092-x	Unigene0104233	Os03g0827700	2260	4.5	4	0.002	1	1	PREDICTED: DEAD-box ATP-dependent RNA helicase 3, chloroplastic isoform X1 [Nelumbo nucifera]	-	-	-	-
	miR2092-x	Unigene0059022	RPS15AA	133	4.5	2	0.01	35	17.5	PREDICTED: 40S ribosomal protein S15a-1-like [Gossypium hirsutum]	ko03010//Ribosome//Translation//Genetic Information Processing	-	-	-
	miR2092-x	Unigene0048694	-	2858	4.5	4	0.002	1	1	--	-	-	-	-
miR390-y	miR390-y	Unigene0031282	RANBP1C	665	4.5	2	0	12	12	Ran-binding protein 1-b-like protein [Morus notabilis]	-	-	-	-
	miR390-y	Unigene0016335	-	633	4.5	4	0.002	1	1	PREDICTED: uncharacterized protein LOC104601793 [Nelumbo nucifera]	-	-	-	-
	miR390-y	Unigene0043301	KN1	899	4	2	0.002	2	1	PREDICTED: homeobox protein knotted-1-like 2 [Theobroma cacao]	-	GO:0043231//intracellular membrane-bounded organelle;GO:0005623//cell;GO:0043226//organelle;GO:0044424//intracellular part;GO:0043229//intracellular organelle;GO:0005622//intracellular;GO:0043227//membrane-bounded organelle;GO:0044464//cell part	GO:0097159//organic cyclic compound binding;GO:0001071//nucleic acid binding transcription factor activity;GO:0003676//nucleic acid binding;GO:0005488//binding;GO:1901363//heterocyclic compound binding;GO:0003677//DNA binding	GO:0009933//meristem structural organization;GO:0048856//anatomical structure development;GO:0003002//regionalization;GO:0000003//reproduction;GO:0060255//regulation of macromolecule metabolic process;GO:0007389//pattern specification process;GO:0048507//meristem development;GO:0003006//developmental process involved in reproduction;GO:0009799//specification of symmetry;GO:0032501//multicellular …
	miR390-y	Unigene0046250	-	2113	4	2	0.002	3	1.5	Glutamate--cysteine ligase [Anthurium amnicola]	-	-	-	-
	miR390-y	Unigene0113115	SLC47A2	361	4.5	2	0.002	4	4	PREDICTED: protein DETOXIFICATION 55-like [Nelumbo nucifera]	-	GO:0044425//membrane part;GO:0031224//intrinsic component of membrane;GO:0016020//membrane	GO:0005215//transporter activity;GO:0015291//secondary active transmembrane transporter activity;GO:0022804//active transmembrane transporter activity;GO:0022857//transmembrane transporter activity	GO:0009987//cellular process;GO:0044699//single-organism process;GO:0044763//single-organism cellular process
	miR390-y	Unigene0048201	-	296	4	4	0.002	1	1	--	-	-	-	-
	miR390-y	Unigene0046642	-	3698	4.5	2	0.002	4	4	PREDICTED: autophagy-related protein 11 [Nelumbo nucifera]	-	-	-	-
	miR390-y	Unigene0055488	UBP14	719	4.5	4	0.002	1	1	PREDICTED: ubiquitin carboxyl-terminal hydrolase 14 isoform X1 [Nelumbo nucifera]	-	GO:0044464//cell part;GO:0005623//cell;GO:0005622//intracellular;GO:0005737//cytoplasm;GO:0044424//intracellular part;GO:0044444//cytoplasmic part	GO:0043169//cation binding;GO:0003824//catalytic activity;GO:0016787//hydrolase activity;GO:0043167//ion binding;GO:0070011//peptidase activity, acting on L-amino acid peptides;GO:0046872//metal ion binding;GO:0046914//transition metal ion binding;GO:0008238//exopeptidase activity;GO:0005488//binding;GO:0008233//peptidase activity	GO:0070646//protein modification by small protein removal;GO:0016049//cell growth;GO:0044767//single-organism developmental process;GO:0048869//cellular developmental process;GO:0044238//primary metabolic process;GO:0009987//cellular process;GO:1901575//organic substance catabolic process;GO:0043412//macromolecule modification;GO:0040007//growth;GO:0048588//developmental cell growth;GO:0006508//p…
	miR390-y	Unigene0060307	GAE6	418	4.5	2	0.002	2	2	PREDICTED: UDP-glucuronate 4-epimerase 6 [Vitis vinifera]	ko01100//Metabolic pathways//Global and Overview//Metabolism;ko00500//Starch and sucrose metabolism//Carbohydrate metabolism//Metabolism;ko00520//Amino sugar and nucleotide sugar metabolism//Carbohydrate metabolism//Metabolism	GO:0016020//membrane;GO:0005623//cell;GO:0098588//bounding membrane of organelle;GO:0012505//endomembrane system;GO:0043231//intracellular membrane-bounded organelle;GO:0044422//organelle part;GO:0043227//membrane-bounded organelle;GO:0031984//organelle subcompartment;GO:0005622//intracellular;GO:0044431//Golgi apparatus part;GO:0044424//intracellular part;GO:0005794//Golgi apparatus;GO:0000139//…	GO:0016857//racemase and epimerase activity, acting on carbohydrates and derivatives;GO:0003824//catalytic activity;GO:0005488//binding;GO:0016854//racemase and epimerase activity;GO:0048037//cofactor binding;GO:0016853//isomerase activity	GO:0006586//indolalkylamine metabolic process;GO:0044106//cellular amine metabolic process;GO:0009850//auxin metabolic process;GO:0071704//organic substance metabolic process;GO:0009987//cellular process;GO:0009683//indoleacetic acid metabolic process;GO:0006520//cellular amino acid metabolic process;GO:0006807//nitrogen compound metabolic process;GO:0032787//monocarboxylic acid metabolic process…
	miR390-y	Unigene0104417	-	44	1.5	4	0.002	1	1	--	-	-	-	-
	miR390-y	Unigene0046249	-	2113	4	2	0.002	3	1.5	Glutamate--cysteine ligase [Anthurium amnicola]	-	-	-	-
	miR390-y	Unigene0106952	gemin2	653	4.5	4	0.002	1	1	Gem-associated protein 2 [Anthurium amnicola]	ko03013//RNA transport//Translation//Genetic Information Processing	-	-	-
	miR390-y	Unigene0065795	RABB1C	730	4	2	0.002	3	3	PREDICTED: ras-related protein RABB1c-like [Phoenix dactylifera]	-	-	-	-
	miR390-y	Unigene0079123	At4g22670	266	4.5	2	0.002	5	5	PREDICTED: TPR repeat-containing thioredoxin TDX isoform X1 [Musa acuminata subsp. malaccensis] [Musa acuminata]	-	-	-	-
	miR390-y	Unigene0034001	ABCF1	1466	4.5	2	0.002	7	7	PREDICTED: ABC transporter F family member 1-like [Nelumbo nucifera]	-	-	GO:0097159//organic cyclic compound binding;GO:0097367//carbohydrate derivative binding;GO:0016817//hydrolase activity, acting on acid anhydrides;GO:1901363//heterocyclic compound binding;GO:0016462//pyrophosphatase activity;GO:0017111//nucleoside-triphosphatase activity;GO:0036094//small molecule binding;GO:0001882//nucleoside binding;GO:0032549//ribonucleoside binding;GO:0032550//purine ribonuc…	-
	miR390-y	Unigene0020244	-	796	4	2	0	2	2	TAC1 [Prunus persica]	-	-	-	-
	miR390-y	Unigene0067655	-	3011	3.5	4	0.002	1	1	PREDICTED: pericentriolar material 1 protein [Theobroma cacao]	-	-	-	-
	miR390-y	Unigene0043302	KN1	170	4	2	0.002	2	1	PREDICTED: homeobox protein knotted-1-like 2 [Theobroma cacao]	-	GO:0005623//cell;GO:0043229//intracellular organelle;GO:0043226//organelle;GO:0043231//intracellular membrane-bounded organelle;GO:0044424//intracellular part;GO:0044464//cell part;GO:0043227//membrane-bounded organelle;GO:0005622//intracellular	GO:0005488//binding;GO:0001071//nucleic acid binding transcription factor activity;GO:0097159//organic cyclic compound binding;GO:1901363//heterocyclic compound binding;GO:0003677//DNA binding;GO:0003676//nucleic acid binding	GO:0009799//specification of symmetry;GO:0000003//reproduction;GO:0044699//single-organism process;GO:0032502//developmental process;GO:0009798//axis specification;GO:0048507//meristem development;GO:0044763//single-organism cellular process;GO:0044767//single-organism developmental process;GO:0032501//multicellular organismal process;GO:0009888//tissue development;GO:0044707//single-multicellula…
	miR390-y	Unigene0084479	-	710	4.5	4	0.002	1	1	Transmembrane protein DDB_G0292058, partial [Anthurium amnicola]	-	-	-	-
	miR390-y	Unigene0041423	COAD	111	4.5	2	0.002	2	1	PREDICTED: phosphopantetheine adenylyltransferase [Nelumbo nucifera]	ko01100//Metabolic pathways//Global and Overview//Metabolism;ko00770//Pantothenate and CoA biosynthesis//Metabolism of cofactors and vitamins//Metabolism	-	-	-
	miR390-y	Unigene0041422	Os07g0179400	563	4.5	2	0.002	2	1	PREDICTED: phosphopantetheine adenylyltransferase [Nelumbo nucifera]	ko01100//Metabolic pathways//Global and Overview//Metabolism;ko00770//Pantothenate and CoA biosynthesis//Metabolism of cofactors and vitamins//Metabolism	-	-	-
	miR390-y	Unigene0054879	ATHB-15	1404	4.5	2	0.002	2	2	PREDICTED: homeobox-leucine zipper protein ATHB-15-like [Nelumbo nucifera]	-	GO:0043229//intracellular organelle;GO:0043231//intracellular membrane-bounded organelle;GO:0043226//organelle;GO:0005623//cell;GO:0044424//intracellular part;GO:0005622//intracellular;GO:0044464//cell part;GO:0043227//membrane-bounded organelle	GO:0003676//nucleic acid binding;GO:0001071//nucleic acid binding transcription factor activity;GO:0003677//DNA binding;GO:1901363//heterocyclic compound binding;GO:0097159//organic cyclic compound binding;GO:0005488//binding	GO:0048869//cellular developmental process;GO:0006950//response to stress;GO:0071840//cellular component organization or biogenesis;GO:1902589//single-organism organelle organization;GO:0030036//actin cytoskeleton organization;GO:0007015//actin filament organization;GO:0000902//cell morphogenesis;GO:0022622//root system development;GO:0009943//adaxial/abaxial axis specification;GO:0048513//animal…
	miR390-y	Unigene0069210	At5g10080	1327	4	4	0.002	1	1	PREDICTED: aspartic proteinase-like protein 1 isoform X1 [Nelumbo nucifera]	-	GO:0044425//membrane part;GO:0031224//intrinsic component of membrane;GO:0016020//membrane;GO:0031225//anchored component of membrane	GO:0016787//hydrolase activity;GO:0003824//catalytic activity	GO:0043170//macromolecule metabolic process;GO:0019538//protein metabolic process;GO:0071704//organic substance metabolic process;GO:0044238//primary metabolic process;GO:0008152//metabolic process
	miR390-y	Unigene0069197	JMJ25	3346	3	2	0.002	3	3	PREDICTED: LOW QUALITY PROTEIN: lysine-specific demethylase JMJ25-like [Phoenix dactylifera]	-	-	-	-
miR395-y	miR395-y	Unigene0063979	zgc:66014	2505	3.5	2	0.004	3	3	PREDICTED: lisH domain and HEAT repeat-containing protein KIAA1468 homolog [Vitis vinifera]	-	-	-	-
	miR395-y	Unigene0065103	TMN1	636	4.5	2	0.004	3	1.5	PREDICTED: transmembrane 9 superfamily member 1 [Daucus carota subsp. sativus] [Daucus carota]	-	-	-	-
	miR395-y	Unigene0068877	-	39	4.5	4	0.006	1	1	--	-	-	-	-
	miR395-y	Unigene0033257	Ccdc97	149	4.5	3	0	2	2	PREDICTED: YTH domain-containing protein 1 [Cucumis sativus]	-	-	-	-
	miR395-y	Unigene0072549	-	51	4	4	0.006	1	0.5	--	-	-	-	-
	miR395-y	Unigene0086027	Rwdd1	798	4.5	2	0.004	5	5	PREDICTED: RWD domain-containing protein 1 isoform X2 [Nelumbo nucifera]	-	-	-	-
	miR395-y	Unigene0073955	VHA-D	602	3.5	4	0.006	1	1	PREDICTED: V-type proton ATPase subunit D [Theobroma cacao]	ko01100//Metabolic pathways//Global and Overview//Metabolism;ko00190//Oxidative phosphorylation//Energy metabolism//Metabolism;ko04145//Phagosome//Transport and catabolism//Cellular Processes	-	GO:0015399//primary active transmembrane transporter activity;GO:0015405//P-P-bond-hydrolysis-driven transmembrane transporter activity;GO:0003824//catalytic activity;GO:0022857//transmembrane transporter activity;GO:0022804//active transmembrane transporter activity;GO:0005215//transporter activity	GO:0009987//cellular process;GO:0044699//single-organism process;GO:0044763//single-organism cellular process
	miR395-y	Unigene0092033	Atad5	4125	2.5	4	0.006	1	1	ATPase family AAA domain-containing protein 5 [Anthurium amnicola]	-	-	-	-
	miR395-y	Unigene0015988	SPBC1703.11	379	4	4	0.006	1	0.5	PREDICTED: OPA3-like protein [Musa acuminata subsp. malaccensis] [Musa acuminata]	-	-	-	-
	miR395-y	Unigene0036160	MYB305	12	4.5	4	0.006	1	1	PREDICTED: myb-related protein 305 [Erythranthe guttata]	-	-	-	-
	miR395-y	Unigene0004015	PHS1	2958	4	4	0.006	1	1	PREDICTED: dual specificity protein phosphatase PHS1 isoform X2 [Citrus sinensis]	-	GO:0044424//intracellular part;GO:0044464//cell part;GO:0005623//cell;GO:0005622//intracellular	GO:0016787//hydrolase activity;GO:0016788//hydrolase activity, acting on ester bonds;GO:0016772//transferase activity, transferring phosphorus-containing groups;GO:0016791//phosphatase activity;GO:0003824//catalytic activity;GO:0042578//phosphoric ester hydrolase activity;GO:0016740//transferase activity;GO:0004721//phosphoprotein phosphatase activity	GO:0071704//organic substance metabolic process;GO:0044260//cellular macromolecule metabolic process;GO:0023052//signaling;GO:0032268//regulation of cellular protein metabolic process;GO:0071310//cellular response to organic substance;GO:0030865//cortical cytoskeleton organization;GO:0071900//regulation of protein serine/threonine kinase activity;GO:0031399//regulation of protein modification pro…
	miR395-y	Unigene0060328	-	1614	4.5	4	0.006	1	1	PREDICTED: uncharacterized protein LOC100266278 isoform X1 [Vitis vinifera]	-	-	-	-
	miR395-y	Unigene0071261	-	61	4.5	4	0.006	1	1	--	-	-	-	-
	miR395-y	Unigene0060290	Wdfy3	749	4.5	2	0.004	2	2	PREDICTED: protein SPIRRIG [Vitis vinifera]	-	-	-	-
	miR395-y	Unigene0004000	WVD2	1381	4	2	0.004	2	2	PREDICTED: protein WVD2-like 5 [Nelumbo nucifera]	-	-	-	-
	miR395-y	Unigene0054035	APS3	409	0.5	0	0	18	18	PREDICTED: ATP sulfurylase 1, chloroplastic [Nelumbo nucifera]	ko01100//Metabolic pathways//Global and Overview//Metabolism;ko01130//Biosynthesis of antibiotics//Global and Overview//Metabolism;ko01120//Microbial metabolism in diverse environments//Global and Overview//Metabolism;ko00230//Purine metabolism//Nucleotide metabolism//Metabolism;ko00920//Sulfur metabolism//Energy metabolism//Metabolism;ko00450//Selenocompound metabolism//Metabolism of other amino…	-	GO:0016740//transferase activity;GO:0070566//adenylyltransferase activity;GO:0016779//nucleotidyltransferase activity;GO:0016772//transferase activity, transferring phosphorus-containing groups;GO:0003824//catalytic activity;GO:0004779//sulfate adenylyltransferase activity	-
	miR395-y	Unigene0095928	-	43	4.5	4	0.006	1	1	--	-	-	-	-
	miR395-y	Unigene0061544	Apeh	1376	3.5	4	0.006	1	1	PREDICTED: acylamino-acid-releasing enzyme 1 isoform X1 [Elaeis guineensis]	-	GO:0044464//cell part;GO:0043227//membrane-bounded organelle;GO:0044424//intracellular part;GO:0005622//intracellular;GO:0043226//organelle;GO:0044444//cytoplasmic part;GO:0005623//cell;GO:0043231//intracellular membrane-bounded organelle;GO:0005737//cytoplasm;GO:0043229//intracellular organelle	GO:0016787//hydrolase activity;GO:0008233//peptidase activity;GO:0003824//catalytic activity;GO:0070011//peptidase activity, acting on L-amino acid peptides	-
	miR395-y	Unigene0033936	TT12	272	4	2	0.004	2	2	PREDICTED: protein DETOXIFICATION 35 [Nelumbo nucifera]	-	GO:0044425//membrane part;GO:0016020//membrane;GO:0031224//intrinsic component of membrane	GO:0005215//transporter activity;GO:0015291//secondary active transmembrane transporter activity;GO:0022804//active transmembrane transporter activity;GO:0022857//transmembrane transporter activity	GO:0009653//anatomical structure morphogenesis;GO:0030154//cell differentiation;GO:0000902//cell morphogenesis;GO:0048869//cellular developmental process;GO:0048468//cell development;GO:0006928//movement of cell or subcellular component;GO:0016043//cellular component organization;GO:0044767//single-organism developmental process;GO:0000904//cell morphogenesis involved in differentiation;GO:000998…
	miR395-y	Unigene0053344	At1g17710	201	3.5	2	0.004	3	1.5	PREDICTED: inorganic pyrophosphatase 1 [Nelumbo nucifera]	ko01100//Metabolic pathways//Global and Overview//Metabolism;ko00750//Vitamin B6 metabolism//Metabolism of cofactors and vitamins//Metabolism	-	GO:0016788//hydrolase activity, acting on ester bonds;GO:0042578//phosphoric ester hydrolase activity;GO:0003824//catalytic activity;GO:0016787//hydrolase activity	GO:0006793//phosphorus metabolic process;GO:0044237//cellular metabolic process;GO:0009987//cellular process;GO:0008152//metabolic process;GO:0006796//phosphate-containing compound metabolic process
	miR395-y	Unigene0070837	DRP3A	2255	3	4	0.006	1	0.5	Dynamin-related protein 3A, partial [Anthurium amnicola]	-	-	GO:0017111//nucleoside-triphosphatase activity;GO:0016462//pyrophosphatase activity;GO:0016818//hydrolase activity, acting on acid anhydrides, in phosphorus-containing anhydrides;GO:0032549//ribonucleoside binding;GO:0001883//purine nucleoside binding;GO:0097367//carbohydrate derivative binding;GO:0036094//small molecule binding;GO:1901363//heterocyclic compound binding;GO:0016817//hydrolase acti…	-
	miR395-y	Unigene0074989	CDKG-2	525	4	2	0.004	4	4	PREDICTED: cyclin-dependent kinase G-2 isoform X2 [Nelumbo nucifera]	-	-	GO:0016740//transferase activity;GO:0003824//catalytic activity	-
	miR395-y	Unigene0092709	IPUT1	1511	3.5	4	0.006	1	1	PREDICTED: putative glucuronosyltransferase PGSIP8 [Nelumbo nucifera]	-	-	-	-
	miR395-y	Unigene0080629	Os03g0728800	1251	4.5	4	0.006	1	1	PREDICTED: DEAD-box ATP-dependent RNA helicase 16 [Nelumbo nucifera]	-	-	-	-
	miR395-y	Unigene0014009	GAMMACAL1	805	3.5	2	0.004	2	1	PREDICTED: gamma carbonic anhydrase-like 2, mitochondrial [Nelumbo nucifera]	-	-	-	-
	miR395-y	Unigene0059226	FEN1	708	4.5	2	0.004	4	4	PREDICTED: flap endonuclease 1 isoform X2 [Prunus mume]	ko03030//DNA replication//Replication and repair//Genetic Information Processing;ko03410//Base excision repair//Replication and repair//Genetic Information Processing;ko03450//Non-homologous end-joining//Replication and repair//Genetic Information Processing	-	-	-
	miR395-y	Unigene0099034	-	183	4.5	3	0.008	4	4	--	-	-	-	-
	miR395-y	Unigene0028143	PEX11C	135	4.5	2	0.004	3	3	Peroxisomal membrane protein 11C [Morus notabilis]	-	-	-	GO:0007031//peroxisome organization;GO:0016043//cellular component organization;GO:0009987//cellular process;GO:0006996//organelle organization;GO:0071840//cellular component organization or biogenesis
	miR395-y	Unigene0077908	Atad1	1275	4.5	4	0.006	1	1	AAA domain-containing protein/FHA domain-containing protein [Cephalotus follicularis]	-	-	GO:0003824//catalytic activity;GO:0016787//hydrolase activity	-
	miR395-y	Unigene0053343	At1g17710	235	3.5	2	0.004	3	1.5	PREDICTED: inorganic pyrophosphatase 1 [Nelumbo nucifera]	ko01100//Metabolic pathways//Global and Overview//Metabolism;ko00750//Vitamin B6 metabolism//Metabolism of cofactors and vitamins//Metabolism	-	GO:0003824//catalytic activity;GO:0042578//phosphoric ester hydrolase activity;GO:0016788//hydrolase activity, acting on ester bonds;GO:0016787//hydrolase activity	GO:0006796//phosphate-containing compound metabolic process;GO:0006793//phosphorus metabolic process;GO:0044237//cellular metabolic process;GO:0009987//cellular process;GO:0008152//metabolic process
	miR395-y	Unigene0062616	DRB4	310	4.5	4	0.006	1	1	PREDICTED: double-stranded RNA-binding protein 4 isoform X3 [Vitis vinifera]	-	-	-	-
	miR395-y	Unigene0074452	Os04g0403701	752	4.5	4	0.006	1	1	PREDICTED: probable protein phosphatase 2C 39 isoform X1 [Nelumbo nucifera]	-	-	-	-
	miR395-y	Unigene0108877	RANBP1C	508	4.5	2	0.004	14	14	Ran-binding protein 1-b-like protein [Morus notabilis]	-	-	-	-
	miR395-y	Unigene0048119	MADS6	744	4.5	3	0	2	2	AGL6-like protein [Chimonanthus praecox]	-	GO:0043227//membrane-bounded organelle;GO:0005623//cell;GO:0005622//intracellular;GO:0043231//intracellular membrane-bounded organelle;GO:0043229//intracellular organelle;GO:0044424//intracellular part;GO:0044464//cell part;GO:0043226//organelle	GO:0005488//binding;GO:0005515//protein binding;GO:0001071//nucleic acid binding transcription factor activity	GO:0009987//cellular process;GO:0060255//regulation of macromolecule metabolic process;GO:0008152//metabolic process;GO:0044249//cellular biosynthetic process;GO:0034645//cellular macromolecule biosynthetic process;GO:0010468//regulation of gene expression;GO:0050789//regulation of biological process;GO:0009058//biosynthetic process;GO:1901576//organic substance biosynthetic process;GO:0009059//m…
	miR395-y	Unigene0060366	DI19-3	680	4.5	4	0.006	1	1	PREDICTED: protein DEHYDRATION-INDUCED 19 homolog 2 isoform X3 [Elaeis guineensis]	-	-	-	-
	miR395-y	Unigene0038383	FRS5	351	4.5	2	0.004	2	1	PREDICTED: protein FAR1-RELATED SEQUENCE 5 [Amborella trichopoda]	-	-	-	-
	miR395-y	Unigene0072550	-	51	4	4	0.006	1	0.5	--	-	-	-	-
	miR395-y	Unigene0049314	BCCP1	540	4.5	4	0.006	1	1	PREDICTED: biotin carboxyl carrier protein of acetyl-CoA carboxylase 2, chloroplastic-like [Nelumbo nucifera]	ko01100//Metabolic pathways//Global and Overview//Metabolism;ko01110//Biosynthesis of secondary metabolites//Global and Overview//Metabolism;ko01130//Biosynthesis of antibiotics//Global and Overview//Metabolism;ko01120//Microbial metabolism in diverse environments//Global and Overview//Metabolism;ko01200//Carbon metabolism//Global and Overview//Metabolism;ko00620//Pyruvate metabolism//Carbohydrat…	-	-	-
	miR395-y	Unigene0065105	TMN1	1516	4.5	2	0.004	3	1.5	PREDICTED: transmembrane 9 superfamily member 1-like isoform X1 [Gossypium raimondii]	-	-	-	-
	miR395-y	Unigene0071566	ypi1	38	4.5	2	0.004	2	1	PREDICTED: LOW QUALITY PROTEIN: type 1 phosphatases regulator ypi1 [Cucumis melo]	-	GO:0032991//macromolecular complex;GO:1903293//phosphatase complex;GO:0005622//intracellular;GO:0044424//intracellular part;GO:0043234//protein complex;GO:0043226//organelle;GO:0043227//membrane-bounded organelle;GO:0044464//cell part;GO:0043231//intracellular membrane-bounded organelle;GO:0005623//cell;GO:0043229//intracellular organelle;GO:1902494//catalytic complex;GO:0008287//protein serine/t…	-	GO:0031323//regulation of cellular metabolic process;GO:0022414//reproductive process;GO:0035308//negative regulation of protein dephosphorylation;GO:0050790//regulation of catalytic activity;GO:0045936//negative regulation of phosphate metabolic process;GO:0080090//regulation of primary metabolic process;GO:0019220//regulation of phosphate metabolic process;GO:0051248//negative regulation of pro…
	miR395-y	Unigene0030110	-	234	4	4	0.006	1	1	putative HTH-type transcriptional regulator ykoM, partial [Anthurium amnicola]	-	-	-	-
	miR395-y	Unigene0068802	NOP5-2	1010	3.5	4	0.006	1	1	PREDICTED: probable nucleolar protein 5-2 isoform X2 [Nelumbo nucifera]	ko03008//Ribosome biogenesis in eukaryotes//Translation//Genetic Information Processing	-	-	-
	miR395-y	Unigene0000479	At1g22040	1217	4.5	4	0.006	1	1	PREDICTED: F-box/kelch-repeat protein At1g22040-like [Nelumbo nucifera]	-	-	-	-
	miR395-y	Unigene0058559	alkbh8	1441	4.5	4	0.006	1	1	PREDICTED: alkylated DNA repair protein alkB homolog 8 [Nelumbo nucifera]	-	-	GO:0003824//catalytic activity;GO:0016491//oxidoreductase activity	GO:0008152//metabolic process
	miR395-y	Unigene0085319	CBK1	1153	3.5	4	0.006	1	1	PREDICTED: serine/threonine-protein kinase 38-like [Nelumbo nucifera]	-	-	GO:0016773//phosphotransferase activity, alcohol group as acceptor;GO:0016740//transferase activity;GO:0004672//protein kinase activity;GO:0032549//ribonucleoside binding;GO:0032550//purine ribonucleoside binding;GO:0003824//catalytic activity;GO:1901363//heterocyclic compound binding;GO:0016772//transferase activity, transferring phosphorus-containing groups;GO:0016301//kinase activity;GO:009736…	GO:0044267//cellular protein metabolic process;GO:0044260//cellular macromolecule metabolic process;GO:0043170//macromolecule metabolic process;GO:0043412//macromolecule modification;GO:0071704//organic substance metabolic process;GO:0019538//protein metabolic process;GO:0036211//protein modification process;GO:0008152//metabolic process;GO:0006793//phosphorus metabolic process;GO:0044237//cellul…
	miR395-y	Unigene0011211	CYP86B1	250	4.5	4	0.006	1	1	PREDICTED: cytochrome P450 86B1 [Vitis vinifera]	ko00073//Cutin, suberine and wax biosynthesis//Lipid metabolism//Metabolism	-	GO:0043167//ion binding;GO:0046906//tetrapyrrole binding;GO:0043169//cation binding;GO:1901363//heterocyclic compound binding;GO:0016491//oxidoreductase activity;GO:0097159//organic cyclic compound binding;GO:0046914//transition metal ion binding;GO:0003824//catalytic activity;GO:0046872//metal ion binding;GO:0005488//binding	GO:0044699//single-organism process;GO:0044710//single-organism metabolic process;GO:0008152//metabolic process
	miR395-y	Unigene0006669	-	1771	4.5	4	0.006	1	1	PREDICTED: protein FYV8 [Vitis vinifera]	-	-	-	-
	miR395-y	Unigene0050466	At1g77220	1464	3.5	4	0.006	1	1	PREDICTED: protein LAZ1 homolog 1 isoform X1 [Vitis vinifera]	-	-	-	-
	miR395-y	Unigene0096327	HSP17.9-D	461	4.5	4	0.006	1	1	cytosolic class II low molecular weight heat shock protein [Prunus dulcis]	ko04141//Protein processing in endoplasmic reticulum//Folding, sorting and degradation//Genetic Information Processing	-	-	-
	miR395-y	Unigene0085968	NUA	998	4	2	0.004	4	4	PREDICTED: nuclear-pore anchor isoform X3 [Nelumbo nucifera]	ko03013//RNA transport//Translation//Genetic Information Processing	-	-	-
	miR395-y	Unigene0094505	PURA1	771	4	2	0.004	4	4	PREDICTED: transcription factor Pur-alpha 1-like [Nelumbo nucifera]	-	-	-	-
	miR395-y	Unigene0001903	SYT1	1038	4.5	2	0	3	3	PREDICTED: synaptotagmin-2-like [Nelumbo nucifera]	-	-	-	-
	miR395-y	Unigene0015987	SPBC1703.11	554	4	4	0.006	1	0.5	PREDICTED: OPA3-like protein [Musa acuminata subsp. malaccensis] [Musa acuminata]	-	-	-	-
	miR395-y	Unigene0069186	PUX1	853	4.5	4	0.006	1	1	PREDICTED: plant UBX domain-containing protein 1 isoform X1 [Nelumbo nucifera]	-	-	-	-
	miR395-y	Unigene0083205	BGLU22	1259	4.5	4	0.006	1	1	PREDICTED: beta-glucosidase 22-like [Nelumbo nucifera]	ko01100//Metabolic pathways//Global and Overview//Metabolism;ko01110//Biosynthesis of secondary metabolites//Global and Overview//Metabolism;ko00500//Starch and sucrose metabolism//Carbohydrate metabolism//Metabolism;ko00940//Phenylpropanoid biosynthesis//Biosynthesis of other secondary metabolites//Metabolism;ko00460//Cyanoamino acid metabolism//Metabolism of other amino acids//Metabolism	-	GO:0016798//hydrolase activity, acting on glycosyl bonds;GO:0003824//catalytic activity;GO:0016787//hydrolase activity	GO:0008152//metabolic process
	miR395-y	Unigene0026597	At5g03900	292	4.5	4	0.006	1	1	iron-sulfur cluster biosynthesis family protein, partial [Chimonanthus praecox]	-	-	-	-
	miR395-y	Unigene0087989	CALS12	2944	3.5	4	0.006	1	1	PREDICTED: callose synthase 12-like [Nelumbo nucifera]	-	-	GO:0003824//catalytic activity;GO:0046527//glucosyltransferase activity;GO:0008194//UDP-glycosyltransferase activity;GO:0016740//transferase activity;GO:0035251//UDP-glucosyltransferase activity;GO:0016757//transferase activity, transferring glycosyl groups;GO:0016758//transferase activity, transferring hexosyl groups	GO:0044237//cellular metabolic process;GO:0044260//cellular macromolecule metabolic process;GO:0009987//cellular process;GO:0044238//primary metabolic process;GO:0005975//carbohydrate metabolic process;GO:0043170//macromolecule metabolic process;GO:0044264//cellular polysaccharide metabolic process;GO:0051273//beta-glucan metabolic process;GO:0008152//metabolic process;GO:0006074//(1->3)-beta-D-g…
	miR395-y	Unigene0061368	TULP3	1648	4.5	4	0.006	1	1	PREDICTED: tubby-like F-box protein 3 [Nelumbo nucifera]	-	-	-	-
	miR395-y	Unigene0017290	CCR1	372	4.5	4	0.006	1	0.5	PREDICTED: cinnamoyl-CoA reductase 1 [Vitis vinifera]	-	-	GO:0005488//binding;GO:0048037//cofactor binding	-
	miR395-y	Unigene0025431	ACS10	1123	4.5	2	0.004	4	4	PREDICTED: probable aminotransferase ACS10 [Theobroma cacao]	-	-	GO:0043167//ion binding;GO:0005488//binding;GO:0016769//transferase activity, transferring nitrogenous groups;GO:0008483//transaminase activity;GO:0016740//transferase activity;GO:0003824//catalytic activity;GO:0043168//anion binding	GO:0044281//small molecule metabolic process;GO:0071704//organic substance metabolic process;GO:0044237//cellular metabolic process;GO:0019752//carboxylic acid metabolic process;GO:0006082//organic acid metabolic process;GO:0043436//oxoacid metabolic process;GO:0008152//metabolic process;GO:0044699//single-organism process;GO:0009987//cellular process;GO:0044763//single-organism cellular process;…
	miR395-y	Unigene0071561	ypi1	38	4.5	2	0.004	2	1	PREDICTED: LOW QUALITY PROTEIN: type 1 phosphatases regulator ypi1 [Cucumis melo]	-	GO:0005623//cell;GO:0044424//intracellular part;GO:0043229//intracellular organelle;GO:1903293//phosphatase complex;GO:0044464//cell part;GO:0043231//intracellular membrane-bounded organelle;GO:0032991//macromolecular complex;GO:0005622//intracellular;GO:0043234//protein complex;GO:0043227//membrane-bounded organelle;GO:0008287//protein serine/threonine phosphatase complex;GO:1902494//catalytic c…	-	GO:0043086//negative regulation of catalytic activity;GO:0010921//regulation of phosphatase activity;GO:0032269//negative regulation of cellular protein metabolic process;GO:0044092//negative regulation of molecular function;GO:0050790//regulation of catalytic activity;GO:0051246//regulation of protein metabolic process;GO:0019222//regulation of metabolic process;GO:0035304//regulation of protein…
	miR395-y	Unigene0006518	GDCSP	1390	4	2	0.004	3	3	PREDICTED: glycine dehydrogenase (decarboxylating), mitochondrial [Nelumbo nucifera]	ko01100//Metabolic pathways//Global and Overview//Metabolism;ko01110//Biosynthesis of secondary metabolites//Global and Overview//Metabolism;ko01130//Biosynthesis of antibiotics//Global and Overview//Metabolism;ko01200//Carbon metabolism//Global and Overview//Metabolism;ko00630//Glyoxylate and dicarboxylate metabolism//Carbohydrate metabolism//Metabolism;ko00260//Glycine, serine and threonine met…	-	-	-
	miR395-y	Unigene0070839	DRP3A	1568	3.5	4	0.006	1	1	Dynamin-related protein 3A, partial [Anthurium amnicola]	-	-	GO:0017111//nucleoside-triphosphatase activity;GO:1901363//heterocyclic compound binding;GO:0016462//pyrophosphatase activity;GO:0001882//nucleoside binding;GO:0097367//carbohydrate derivative binding;GO:0032549//ribonucleoside binding;GO:0016818//hydrolase activity, acting on acid anhydrides, in phosphorus-containing anhydrides;GO:0097159//organic cyclic compound binding;GO:0032550//purine ribon…	-
	miR395-y	Unigene0047766	ALDH2C4	48	3	4	0.006	1	1	PREDICTED: aldehyde dehydrogenase family 2 member C4-like [Nelumbo nucifera]	ko00940//Phenylpropanoid biosynthesis//Biosynthesis of other secondary metabolites//Metabolism	-	GO:0016491//oxidoreductase activity;GO:0016903//oxidoreductase activity, acting on the aldehyde or oxo group of donors;GO:0003824//catalytic activity	GO:0044699//single-organism process;GO:0008152//metabolic process;GO:0044710//single-organism metabolic process
	miR395-y	Unigene0029181	At4g17486	789	4.5	2	0.004	2	2	PREDICTED: desumoylating isopeptidase 2-like [Nelumbo nucifera]	-	-	-	-
	miR395-y	Unigene0108475	EID1	477	4.5	2	0.004	8	8	PREDICTED: phytochrome A-associated F-box protein-like [Nelumbo nucifera]	-	-	-	GO:0009987//cellular process;GO:0009416//response to light stimulus;GO:0009628//response to abiotic stimulus;GO:0044700//single organism signaling;GO:0044237//cellular metabolic process;GO:0044260//cellular macromolecule metabolic process;GO:0050789//regulation of biological process;GO:0043170//macromolecule metabolic process;GO:0023052//signaling;GO:0007275//multicellular organism development;GO…
	miR395-y	Unigene0058444	HLTF	437	4	4	0.006	1	1	SNF2_N domain-containing protein/Helicase_C domain-containing protein/HIRAN domain-containing protein/zf-C3HC4_2 domain-containing protein, partial [Cephalotus follicularis]	-	-	-	-
	miR395-y	Unigene0033032	At1g79600	399	4.5	4	0.006	1	0.5	PREDICTED: uncharacterized aarF domain-containing protein kinase At1g79600, chloroplastic [Jatropha curcas]	-	-	GO:0005488//binding;GO:0001882//nucleoside binding;GO:0036094//small molecule binding;GO:0001883//purine nucleoside binding;GO:0097159//organic cyclic compound binding;GO:1901363//heterocyclic compound binding;GO:0097367//carbohydrate derivative binding;GO:0016740//transferase activity;GO:0032550//purine ribonucleoside binding;GO:0003824//catalytic activity;GO:0032549//ribonucleoside binding	GO:0044237//cellular metabolic process;GO:0043170//macromolecule metabolic process;GO:0036211//protein modification process;GO:0006464//cellular protein modification process;GO:0008152//metabolic process;GO:0044267//cellular protein metabolic process;GO:0044238//primary metabolic process;GO:0071704//organic substance metabolic process;GO:0009987//cellular process;GO:0043412//macromolecule modific…
	miR395-y	Unigene0010483	HVA22A	44	3.5	2	0.004	2	2	HVA22-like protein a [Anthurium amnicola]	-	GO:0044425//membrane part;GO:0016020//membrane;GO:0031224//intrinsic component of membrane	-	-
	miR395-y	Unigene0026840	KRI1	1573	4.5	4	0.006	1	1	PREDICTED: protein KRI1 homolog [Nelumbo nucifera]	-	-	-	-
	miR395-y	Unigene0052006	AHL10	854	4	2	0.004	2	2	PREDICTED: AT-hook motif nuclear-localized protein 14 [Nelumbo nucifera]	-	-	-	-
	miR395-y	Unigene0093519	At1g06620	319	4.5	2	0.004	2	2	PREDICTED: 1-aminocyclopropane-1-carboxylate oxidase homolog 4-like [Nelumbo nucifera]	-	-	-	-
	miR395-y	Unigene0063475	CAF1-7	907	4.5	2	0.004	2	2	PREDICTED: probable CCR4-associated factor 1 homolog 7 [Nelumbo nucifera]	ko03018//RNA degradation//Folding, sorting and degradation//Genetic Information Processing	GO:0043231//intracellular membrane-bounded organelle;GO:0043227//membrane-bounded organelle;GO:0043229//intracellular organelle;GO:0044464//cell part;GO:0043226//organelle;GO:0005622//intracellular;GO:0005623//cell;GO:0044424//intracellular part	GO:0003824//catalytic activity;GO:0016787//hydrolase activity;GO:0004518//nuclease activity;GO:0000175//3'-5'-exoribonuclease activity;GO:0004540//ribonuclease activity;GO:0016788//hydrolase activity, acting on ester bonds;GO:0004527//exonuclease activity;GO:0008408//3'-5' exonuclease activity;GO:0004532//exoribonuclease activity;GO:0016796//exonuclease activity, active with either ribo- or deoxy…	GO:0090305//nucleic acid phosphodiester bond hydrolysis;GO:0034641//cellular nitrogen compound metabolic process;GO:0044260//cellular macromolecule metabolic process;GO:0008152//metabolic process;GO:0090501//RNA phosphodiester bond hydrolysis;GO:0090304//nucleic acid metabolic process;GO:0043170//macromolecule metabolic process;GO:0016070//RNA metabolic process;GO:0006807//nitrogen compound metab…
	miR395-y	Unigene0098188	-	472	4	2	0.004	2	2	protein DELETION OF SUV3 SUPPRESSOR 1(I) [Ananas comosus]	ko03050//Proteasome//Folding, sorting and degradation//Genetic Information Processing;ko03440//Homologous recombination//Replication and repair//Genetic Information Processing	-	-	-
	miR395-y	Unigene0007108	-	467	4.5	4	0.006	1	1	PREDICTED: uncharacterized protein LOC104612348 [Nelumbo nucifera]	-	-	-	-
	miR395-y	Unigene0044569	VOZ1	1085	3	4	0.006	1	1	PREDICTED: transcription factor VOZ1 [Nelumbo nucifera]	-	GO:0043231//intracellular membrane-bounded organelle;GO:0005623//cell;GO:0043227//membrane-bounded organelle;GO:0043226//organelle;GO:0005622//intracellular;GO:0043229//intracellular organelle;GO:0044424//intracellular part;GO:0044464//cell part	GO:1901363//heterocyclic compound binding;GO:0043169//cation binding;GO:0003677//DNA binding;GO:0097159//organic cyclic compound binding;GO:0005488//binding;GO:0043167//ion binding;GO:0003676//nucleic acid binding	GO:0009583//detection of light stimulus;GO:0009987//cellular process;GO:2000026//regulation of multicellular organismal development;GO:1903506//regulation of nucleic acid-templated transcription;GO:0051094//positive regulation of developmental process;GO:0009314//response to radiation;GO:0007165//signal transduction;GO:0007602//phototransduction;GO:0006355//regulation of transcription, DNA-templa…
	miR395-y	Unigene0006057	Alg13	536	4.5	2	0.004	3	3	PREDICTED: UDP-N-acetylglucosamine transferase subunit ALG13 homolog isoform X1 [Elaeis guineensis]	ko01100//Metabolic pathways//Global and Overview//Metabolism;ko00510//N-Glycan biosynthesis//Glycan biosynthesis and metabolism//Metabolism	-	GO:0005488//binding;GO:0016757//transferase activity, transferring glycosyl groups;GO:0003824//catalytic activity;GO:0016740//transferase activity	GO:0006629//lipid metabolic process;GO:0044255//cellular lipid metabolic process;GO:0044763//single-organism cellular process;GO:0030258//lipid modification;GO:0071704//organic substance metabolic process;GO:0008152//metabolic process;GO:0044699//single-organism process;GO:0044237//cellular metabolic process;GO:0044238//primary metabolic process;GO:0044710//single-organism metabolic process;GO:00…
	miR395-y	Unigene0026352	SAP9	1178	4.5	4	0.006	1	0.5	PREDICTED: zinc finger A20 and AN1 domain-containing stress-associated protein 6-like [Nelumbo nucifera]	-	-	-	-
	miR395-y	Unigene0089795	MT2	23	4	2	0.004	93	93	metallothionein-like protein type 3 [Ananas comosus]	-	-	-	GO:0048518//positive regulation of biological process;GO:0044767//single-organism developmental process;GO:0008104//protein localization;GO:0032535//regulation of cellular component size;GO:0055065//metal ion homeostasis;GO:0009987//cellular process;GO:0044707//single-multicellular organism process;GO:0050801//ion homeostasis;GO:0032502//developmental process;GO:0050794//regulation of cellular pr…
	miR395-y	Unigene0001045	HSL1	3229	4	4	0.006	1	1	PREDICTED: receptor-like protein kinase HSL1 [Ziziphus jujuba]	-	GO:0016020//membrane	GO:1901363//heterocyclic compound binding;GO:0036094//small molecule binding;GO:0004672//protein kinase activity;GO:0005488//binding;GO:0097159//organic cyclic compound binding;GO:0016301//kinase activity;GO:0016740//transferase activity;GO:0016773//phosphotransferase activity, alcohol group as acceptor;GO:0003824//catalytic activity;GO:0016772//transferase activity, transferring phosphorus-conta…	GO:0044260//cellular macromolecule metabolic process;GO:0044237//cellular metabolic process;GO:0006793//phosphorus metabolic process;GO:0019538//protein metabolic process;GO:0008152//metabolic process;GO:0006796//phosphate-containing compound metabolic process;GO:0006464//cellular protein modification process;GO:0016310//phosphorylation;GO:0044267//cellular protein metabolic process;GO:0009987//c…
	miR395-y	Unigene0014010	GAMMACAL2	374	3.5	2	0.004	2	1	PREDICTED: gamma carbonic anhydrase-like 2, mitochondrial [Nelumbo nucifera]	-	-	-	-
	miR395-y	Unigene0018235	PUB38	887	4.5	4	0.006	1	1	PREDICTED: U-box domain-containing protein 38 [Nelumbo nucifera]	-	-	-	-
	miR395-y	Unigene0088485	-	468	4	2	0.004	2	2	Senescence regulator [Cynara cardunculus var. scolymus] [Cynara cardunculus]	-	-	-	-
	miR395-y	Unigene0071460	yipf6	1138	4.5	4	0.006	1	1	PREDICTED: protein YIPF6 homolog [Tarenaya hassleriana]	-	-	-	-
	miR395-y	Unigene0060158	BRM	1571	4.5	2	0.004	3	3	PREDICTED: ATP-dependent helicase BRM-like isoform X1 [Nelumbo nucifera]	-	GO:0044424//intracellular part;GO:0005622//intracellular;GO:0044464//cell part;GO:0005623//cell	GO:0003824//catalytic activity;GO:1901363//heterocyclic compound binding;GO:0016817//hydrolase activity, acting on acid anhydrides;GO:0097159//organic cyclic compound binding;GO:0005488//binding;GO:0016818//hydrolase activity, acting on acid anhydrides, in phosphorus-containing anhydrides;GO:0003676//nucleic acid binding;GO:0016787//hydrolase activity	GO:0034645//cellular macromolecule biosynthetic process;GO:0016043//cellular component organization;GO:0043170//macromolecule metabolic process;GO:0071704//organic substance metabolic process;GO:0065007//biological regulation;GO:0009059//macromolecule biosynthetic process;GO:0051276//chromosome organization;GO:0043933//macromolecular complex subunit organization;GO:0060255//regulation of macromol…
	miR395-y	Unigene0104220	Znf385d	1338	4.5	2	0.004	3	3	PREDICTED: zinc finger protein 346-like isoform X2 [Juglans regia]	-	-	-	-
	miR395-y	Unigene0045945	At1g05000	324	3	2	0.004	2	2	PREDICTED: probable tyrosine-protein phosphatase At1g05000 [Nelumbo nucifera]	-	-	GO:0016788//hydrolase activity, acting on ester bonds;GO:0003824//catalytic activity;GO:0016787//hydrolase activity;GO:0042578//phosphoric ester hydrolase activity	GO:0043170//macromolecule metabolic process;GO:0009987//cellular process;GO:0008152//metabolic process;GO:0044238//primary metabolic process;GO:0044260//cellular macromolecule metabolic process;GO:0016311//dephosphorylation;GO:0006470//protein dephosphorylation;GO:0019538//protein metabolic process;GO:0071704//organic substance metabolic process;GO:0044267//cellular protein metabolic process;GO:0…
	miR395-y	Unigene0065993	-	782	4.5	2	0.004	3	3	histone-lysine N-methyltransferase [Arabidopsis thaliana]	-	GO:0005737//cytoplasm;GO:0044424//intracellular part;GO:0044444//cytoplasmic part;GO:0005622//intracellular;GO:0044464//cell part;GO:0005623//cell	-	-
	miR395-y	Unigene0051739	VIL2	1076	4	4	0.006	1	1	PREDICTED: protein VERNALIZATION INSENSITIVE 3 isoform X1 [Phoenix dactylifera]	-	-	-	-
	miR395-y	Unigene0059069	At1g13570	1417	3	4	0.006	1	1	F-box/LRR-repeat protein At3g26922-like [Ananas comosus]	-	-	-	-
	miR395-y	Unigene0082588	DRP3A	1946	4	2	0.004	2	2	Dynamin-related protein 3A, partial [Anthurium amnicola]	-	-	GO:0005488//binding;GO:0001883//purine nucleoside binding;GO:0016818//hydrolase activity, acting on acid anhydrides, in phosphorus-containing anhydrides;GO:0003824//catalytic activity;GO:0097159//organic cyclic compound binding;GO:0017111//nucleoside-triphosphatase activity;GO:0036094//small molecule binding;GO:0016817//hydrolase activity, acting on acid anhydrides;GO:1901363//heterocyclic compou…	-
	miR395-y	Unigene0082761	AUL1	1431	4	2	0.004	7	7	PREDICTED: auxilin-like protein 1 [Nelumbo nucifera]	-	-	-	-
	miR395-y	Unigene0038384	FRS5	351	4.5	2	0.004	2	1	PREDICTED: protein FAR1-RELATED SEQUENCE 7 [Beta vulgaris subsp. vulgaris] [Beta vulgaris]	-	-	-	-
	miR395-y	Unigene0026353	SAP9	1031	4.5	4	0.006	1	0.5	PREDICTED: zinc finger A20 and AN1 domain-containing stress-associated protein 6-like [Nelumbo nucifera]	-	-	-	-
	miR395-y	Unigene0075767	AAE17	1300	4.5	4	0.006	1	1	PREDICTED: probable acyl-activating enzyme 17, peroxisomal isoform X1 [Nelumbo nucifera]	-	-	-	-
	miR395-y	Unigene0080388	NRAMP2	1286	4.5	4	0.006	1	1	PREDICTED: metal transporter Nramp2-like [Juglans regia]	-	-	-	GO:0051179//localization;GO:0051234//establishment of localization
	miR395-y	Unigene0017291	CCR1	372	4.5	4	0.006	1	0.5	PREDICTED: cinnamoyl-CoA reductase 1 [Vitis vinifera]	-	-	GO:0048037//cofactor binding;GO:0005488//binding;GO:0016616//oxidoreductase activity, acting on the CH-OH group of donors, NAD or NADP as acceptor;GO:0016491//oxidoreductase activity;GO:0003824//catalytic activity;GO:0016614//oxidoreductase activity, acting on CH-OH group of donors	GO:0044699//single-organism process;GO:0008152//metabolic process;GO:0044710//single-organism metabolic process;GO:0022414//reproductive process;GO:0003006//developmental process involved in reproduction;GO:0000003//reproduction;GO:0032502//developmental process
	miR395-y	Unigene0042948	-	2364	4.5	4	0.006	1	1	GTP-dependent nucleic acid-binding protein engD [Anthurium amnicola]	-	-	-	-
	miR395-y	Unigene0077720	EMB2750	271	3.5	4	0.006	1	1	PREDICTED: pentatricopeptide repeat-containing protein At3g06430, chloroplastic [Nelumbo nucifera]	-	GO:0043231//intracellular membrane-bounded organelle;GO:0005622//intracellular;GO:0043226//organelle;GO:0043227//membrane-bounded organelle;GO:0044464//cell part;GO:0044424//intracellular part;GO:0005623//cell;GO:0043229//intracellular organelle	GO:0097159//organic cyclic compound binding;GO:0003723//RNA binding;GO:1901363//heterocyclic compound binding;GO:0003676//nucleic acid binding;GO:0005488//binding	GO:0044767//single-organism developmental process;GO:0032502//developmental process;GO:0003006//developmental process involved in reproduction;GO:0007275//multicellular organism development;GO:0032501//multicellular organismal process;GO:0048229//gametophyte development;GO:0022414//reproductive process;GO:0044707//single-multicellular organism process;GO:0044699//single-organism process;GO:000000…
	miR395-y	Unigene0041188	CBLL1	1294	4.5	2	0.004	3	3	PREDICTED: E3 ubiquitin-protein ligase Hakai [Nelumbo nucifera]	-	-	-	-
	miR395-y	Unigene0073108	Os11g0472000	1901	4.5	2	0.004	3	3	PREDICTED: zinc finger CCCH domain-containing protein ZFN-like isoform X1 [Elaeis guineensis]	-	-	-	-
	miR395-y	Unigene0070927	DBR	253	4	4	0.006	1	1	probably inactive leucine-rich repeat receptor-like protein kinase At5g48380 [Ananas comosus]	-	-	-	-
	miR395-y	Unigene0103776	RPL7B	699	4	2	0.004	7	7	PREDICTED: 60S ribosomal protein L7-2-like [Nelumbo nucifera]	ko03010//Ribosome//Translation//Genetic Information Processing	GO:0032991//macromolecular complex	-	-
	miR395-y	Unigene0093478	Polr1d	114	4.5	2	0.004	4	4	PREDICTED: DNA-directed RNA polymerases I and III subunit RPAC2-like [Prunus mume]	ko01100//Metabolic pathways//Global and Overview//Metabolism;ko00230//Purine metabolism//Nucleotide metabolism//Metabolism;ko00240//Pyrimidine metabolism//Nucleotide metabolism//Metabolism;ko03020//RNA polymerase//Transcription//Genetic Information Processing	GO:0043227//membrane-bounded organelle;GO:0005623//cell;GO:0043229//intracellular organelle;GO:0044424//intracellular part;GO:0044446//intracellular organelle part;GO:0070013//intracellular organelle lumen;GO:0005654//nucleoplasm;GO:0043231//intracellular membrane-bounded organelle;GO:0005634//nucleus;GO:0031974//membrane-enclosed lumen;GO:0044451//nucleoplasm part;GO:0044422//organelle part;GO:0…	GO:0016779//nucleotidyltransferase activity;GO:0005515//protein binding;GO:0034062//RNA polymerase activity;GO:0003824//catalytic activity;GO:0016772//transferase activity, transferring phosphorus-containing groups;GO:0016740//transferase activity;GO:0005488//binding	GO:0009987//cellular process;GO:0043170//macromolecule metabolic process;GO:1901576//organic substance biosynthetic process;GO:0044249//cellular biosynthetic process;GO:0071704//organic substance metabolic process;GO:0044260//cellular macromolecule metabolic process;GO:0009059//macromolecule biosynthetic process;GO:0034645//cellular macromolecule biosynthetic process;GO:0008152//metabolic process…
	miR395-y	Unigene0049993	At4g18820	3716	4.5	2	0.004	2	2	PREDICTED: protein STICHEL-like 3 isoform X1 [Nelumbo nucifera]	-	-	-	-
	miR395-y	Unigene0060384	TTC7B	432	4.5	4	0.006	1	1	PREDICTED: tetratricopeptide repeat protein 7A [Vitis vinifera]	-	GO:0016020//membrane	-	-
	miR395-y	Unigene0033034	At1g79600	399	4.5	4	0.006	1	0.5	PREDICTED: uncharacterized aarF domain-containing protein kinase At1g79600, chloroplastic isoform X1 [Populus euphratica]	-	-	GO:0036094//small molecule binding;GO:0032550//purine ribonucleoside binding;GO:0097367//carbohydrate derivative binding;GO:0001883//purine nucleoside binding;GO:0005488//binding;GO:0001882//nucleoside binding;GO:1901363//heterocyclic compound binding;GO:0097159//organic cyclic compound binding;GO:0016740//transferase activity;GO:0032549//ribonucleoside binding;GO:0003824//catalytic activity	GO:0009987//cellular process;GO:0006464//cellular protein modification process;GO:0008152//metabolic process;GO:0044237//cellular metabolic process;GO:0044267//cellular protein metabolic process;GO:0036211//protein modification process;GO:0043170//macromolecule metabolic process;GO:0071704//organic substance metabolic process;GO:0044238//primary metabolic process;GO:0019538//protein metabolic pro…
	miR395-y	Unigene0080079	-	131	4.5	4	0.006	1	1	--	-	-	-	-
	miR395-y	Unigene0041273	At1g31850	291	4.5	4	0.006	1	1	PREDICTED: probable methyltransferase PMT21 [Elaeis guineensis]	-	-	GO:0003824//catalytic activity	GO:0008152//metabolic process
	miR395-y	Unigene0053491	PRS3	430	4.5	2	0.004	3	3	PREDICTED: ribose-phosphate pyrophosphokinase 4 isoform X1 [Nelumbo nucifera]	-	-	-	-
	miR395-y	Unigene0026753	Snd1	1419	4.5	2	0.004	6	6	PREDICTED: staphylococcal nuclease domain-containing protein 1 [Nelumbo nucifera]	-	-	-	GO:0065007//biological regulation;GO:0009987//cellular process;GO:0060255//regulation of macromolecule metabolic process;GO:0010605//negative regulation of macromolecule metabolic process;GO:0016458//gene silencing;GO:0010468//regulation of gene expression;GO:0010629//negative regulation of gene expression;GO:0044763//single-organism cellular process;GO:0019222//regulation of metabolic process;GO…
miR5179-x	miR5179-x	Unigene0057368	PAB2	2068	4.5	2	0.006	5	5	PREDICTED: polyadenylate-binding protein 2 [Amborella trichopoda]	ko03013//RNA transport//Translation//Genetic Information Processing;ko03018//RNA degradation//Folding, sorting and degradation//Genetic Information Processing;ko03015//mRNA surveillance pathway//Translation//Genetic Information Processing	GO:0043231//intracellular membrane-bounded organelle;GO:0043229//intracellular organelle;GO:0044424//intracellular part;GO:0005623//cell;GO:0043226//organelle;GO:0044444//cytoplasmic part;GO:0043227//membrane-bounded organelle;GO:0044464//cell part;GO:0005622//intracellular;GO:0005737//cytoplasm	GO:0003676//nucleic acid binding;GO:0097159//organic cyclic compound binding;GO:0005488//binding;GO:1901363//heterocyclic compound binding	GO:0019222//regulation of metabolic process;GO:0044764//multi-organism cellular process;GO:0009987//cellular process;GO:0050789//regulation of biological process;GO:0051704//multi-organism process;GO:0065007//biological regulation;GO:0044419//interspecies interaction between organisms;GO:0016032//viral process;GO:0044403//symbiosis, encompassing mutualism through parasitism;GO:0010608//posttransc…
	miR5179-x	Unigene0079006	At4g32130	11	4.5	4	0.002	1	1	PREDICTED: ER membrane protein complex subunit 7 homolog isoform X2 [Jatropha curcas]	-	-	-	-
	miR5179-x	Unigene0054271	RhGT1	857	3.5	4	0.002	1	1	PREDICTED: UDP-glycosyltransferase 88B1-like [Nelumbo nucifera]	-	-	-	-
	miR5179-x	Unigene0021703	GRXC1	102	4	2	0.006	14	14	glutaredoxin, partial [Chimonanthus praecox]	-	-	GO:0016491//oxidoreductase activity;GO:0016667//oxidoreductase activity, acting on a sulfur group of donors;GO:0003824//catalytic activity;GO:0015036//disulfide oxidoreductase activity	GO:0042592//homeostatic process;GO:0044763//single-organism cellular process;GO:0065008//regulation of biological quality;GO:0019725//cellular homeostasis;GO:0044699//single-organism process;GO:0008152//metabolic process;GO:0065007//biological regulation;GO:0044710//single-organism metabolic process;GO:0009987//cellular process
	miR5179-x	Unigene0016486	TCP11	449	4.5	2	0.006	3	3	T-complex protein 11-like protein 1 [Ananas comosus]	-	-	-	-
	miR5179-x	Unigene0039829	MPK3	1236	4.5	4	0	1	1	PREDICTED: mitogen-activated protein kinase 4 isoform X1 [Phoenix dactylifera]	-	-	GO:0004672//protein kinase activity;GO:0001882//nucleoside binding;GO:0005488//binding;GO:0016773//phosphotransferase activity, alcohol group as acceptor;GO:0016740//transferase activity;GO:1901363//heterocyclic compound binding;GO:0097159//organic cyclic compound binding;GO:0004702//receptor signaling protein serine/threonine kinase activity;GO:0001883//purine nucleoside binding;GO:0016772//tran…	GO:0044237//cellular metabolic process;GO:0043170//macromolecule metabolic process;GO:0006796//phosphate-containing compound metabolic process;GO:0009987//cellular process;GO:0071704//organic substance metabolic process;GO:0008152//metabolic process;GO:0006464//cellular protein modification process;GO:0044267//cellular protein metabolic process;GO:0044238//primary metabolic process;GO:0006793//ph…
	miR5179-x	Unigene0046540	FER	1457	4	4	0.002	1	1	PREDICTED: receptor-like protein kinase FERONIA [Nelumbo nucifera]	-	-	-	-
	miR5179-x	Unigene0073542	tal	719	3.5	4	0.002	1	1	Transaldolase [Anthurium amnicola]	ko01100//Metabolic pathways//Global and Overview//Metabolism;ko01110//Biosynthesis of secondary metabolites//Global and Overview//Metabolism;ko01130//Biosynthesis of antibiotics//Global and Overview//Metabolism;ko01120//Microbial metabolism in diverse environments//Global and Overview//Metabolism;ko01200//Carbon metabolism//Global and Overview//Metabolism;ko01230//Biosynthesis of amino acids//Glo…	-	-	-
	miR5179-x	Unigene0049578	-	607	2.5	4	0.002	1	1	--	-	-	-	-
	miR5179-x	Unigene0044971	-	1089	4.5	2	0.006	6	6	--	-	-	-	-
	miR5179-x	Unigene0064584	USP39	787	4.5	4	0.002	1	1	PREDICTED: U4/U6.U5 tri-snRNP-associated protein 2 [Theobroma cacao]	ko03040//Spliceosome//Transcription//Genetic Information Processing	-	GO:0043167//ion binding;GO:0003824//catalytic activity;GO:0005488//binding;GO:0016787//hydrolase activity;GO:0046872//metal ion binding;GO:0043169//cation binding;GO:0046914//transition metal ion binding	GO:0044237//cellular metabolic process;GO:0006508//proteolysis;GO:0044248//cellular catabolic process;GO:0044267//cellular protein metabolic process;GO:0009987//cellular process;GO:0008152//metabolic process;GO:0030163//protein catabolic process;GO:0044238//primary metabolic process;GO:0044260//cellular macromolecule metabolic process;GO:0019538//protein metabolic process;GO:0071704//organic subs…
	miR5179-x	Unigene0043275	katnal2	933	2	4	0	1	1	PREDICTED: katanin p60 ATPase-containing subunit A-like 2 isoform X2 [Prunus mume]	-	-	GO:0036094//small molecule binding;GO:0003824//catalytic activity;GO:0032549//ribonucleoside binding;GO:0097159//organic cyclic compound binding;GO:0017111//nucleoside-triphosphatase activity;GO:0016462//pyrophosphatase activity;GO:0001882//nucleoside binding;GO:0016887//ATPase activity;GO:0042623//ATPase activity, coupled;GO:0032550//purine ribonucleoside binding;GO:0016818//hydrolase activity, …	-
	miR5179-x	Unigene0061694	aip1	890	4.5	4	0.002	1	1	stress protein, partial [Anthurium amnicola]	-	-	-	-
	miR5179-x	Unigene0111985	At5g41670	1105	4.5	2	0.006	14	14	PREDICTED: 6-phosphogluconate dehydrogenase, decarboxylating 1, chloroplastic isoform X1 [Citrus sinensis]	ko01100//Metabolic pathways//Global and Overview//Metabolism;ko01110//Biosynthesis of secondary metabolites//Global and Overview//Metabolism;ko01130//Biosynthesis of antibiotics//Global and Overview//Metabolism;ko01120//Microbial metabolism in diverse environments//Global and Overview//Metabolism;ko01200//Carbon metabolism//Global and Overview//Metabolism;ko00480//Glutathione metabolism//Metaboli…	-	GO:0097159//organic cyclic compound binding;GO:0048037//cofactor binding;GO:1901265//nucleoside phosphate binding;GO:0000166//nucleotide binding;GO:0016614//oxidoreductase activity, acting on CH-OH group of donors;GO:0005488//binding;GO:0016491//oxidoreductase activity;GO:1901363//heterocyclic compound binding;GO:0003824//catalytic activity;GO:0036094//small molecule binding	GO:1901564//organonitrogen compound metabolic process;GO:0006807//nitrogen compound metabolic process;GO:0055086//nucleobase-containing small molecule metabolic process;GO:0019362//pyridine nucleotide metabolic process;GO:0006725//cellular aromatic compound metabolic process;GO:0006793//phosphorus metabolic process;GO:0044281//small molecule metabolic process;GO:0044710//single-organism metabolic…
	miR5179-x	Unigene0051046	VCS	3917	4	4	0.002	1	1	PREDICTED: enhancer of mRNA-decapping protein 4 [Nelumbo nucifera]	ko03018//RNA degradation//Folding, sorting and degradation//Genetic Information Processing	-	-	-
	miR5179-x	Unigene0072886	ZEP	470	3	2	0.006	2	1	PREDICTED: zeaxanthin epoxidase, chloroplastic isoform X1 [Nelumbo nucifera]	-	-	-	-
	miR5179-x	Unigene0105521	-	1696	3.5	4	0.002	1	1	DUF668 domain-containing protein/DUF3475 domain-containing protein, partial [Cephalotus follicularis]	-	-	-	-
	miR5179-x	Unigene0071952	HUA1	914	3.5	2	0.006	2	2	PREDICTED: zinc finger CCCH domain-containing protein 37 isoform X1 [Nelumbo nucifera]	-	-	-	-
	miR5179-x	Unigene0088455	AGP23	148	3.5	4	0.002	1	1	PREDICTED: arabinogalactan peptide 23-like [Juglans regia]	-	GO:0016020//membrane	-	-
	miR5179-x	Unigene0072884	ZEP	1151	3	2	0.006	2	1	PREDICTED: zeaxanthin epoxidase, chloroplastic isoform X1 [Nelumbo nucifera]	-	-	-	-
miR6293-x	miR6293-x	Unigene0054017	Os05g0428700	1944	4	2	0.002	7	7	PREDICTED: potassium channel AKT2 [Elaeis guineensis]	-	GO:0016020//membrane	-	GO:0009987//cellular process;GO:0044763//single-organism cellular process;GO:0006810//transport;GO:0055085//transmembrane transport;GO:0006811//ion transport;GO:1902578//single-organism localization;GO:0051179//localization;GO:0034220//ion transmembrane transport;GO:0051234//establishment of localization;GO:0044699//single-organism process;GO:0044765//single-organism transport;GO:0030001//metal i…
	miR6293-x	Unigene0108891	STP5	1541	4	4	0.018	1	1	PREDICTED: sugar transport protein 5 isoform X1 [Amborella trichopoda]	-	-	-	-
	miR6293-x	Unigene0046875	ALATS	1235	4.5	2	0.002	4	4	PREDICTED: alanine--tRNA ligase [Nelumbo nucifera]	ko00970//Aminoacyl-tRNA biosynthesis//Translation//Genetic Information Processing	GO:0005623//cell;GO:0044464//cell part;GO:0044424//intracellular part;GO:0043226//organelle;GO:0043227//membrane-bounded organelle;GO:0005622//intracellular;GO:0043229//intracellular organelle;GO:0043231//intracellular membrane-bounded organelle	GO:0046872//metal ion binding;GO:0016876//ligase activity, forming aminoacyl-tRNA and related compounds;GO:0005488//binding;GO:0036094//small molecule binding;GO:0032549//ribonucleoside binding;GO:0016874//ligase activity;GO:0004812//aminoacyl-tRNA ligase activity;GO:0046914//transition metal ion binding;GO:0003824//catalytic activity;GO:0001882//nucleoside binding;GO:0043167//ion binding;GO:0032…	GO:0006725//cellular aromatic compound metabolic process;GO:0006520//cellular amino acid metabolic process;GO:0010467//gene expression;GO:0006418//tRNA aminoacylation for protein translation;GO:0034645//cellular macromolecule biosynthetic process;GO:0071704//organic substance metabolic process;GO:0043603//cellular amide metabolic process;GO:0043039//tRNA aminoacylation;GO:0034641//cellular nitrog…
	miR6293-x	Unigene0079903	DTXL3	1243	4.5	2	0.002	6	6	PREDICTED: protein DETOXIFICATION 12-like [Phoenix dactylifera]	-	-	-	-
	miR6293-x	Unigene0053325	CYCD3-1	430	4.5	4	0.018	1	1	PREDICTED: cyclin-D2-1 [Prunus mume]	-	-	-	-
	miR6293-x	Unigene0039784	CYP19-4	220	4	2	0.002	8	4	PREDICTED: peptidyl-prolyl cis-trans isomerase CYP20-1-like isoform X3 [Nelumbo nucifera]	-	-	-	-
	miR6293-x	Unigene0038941	MBD8	3141	4.5	4	0.018	1	0.5	Zinc finger, C2H2-like protein [Corchorus capsularis]	-	-	-	-
	miR6293-x	Unigene0100771	-	231	4.5	3	0.002	2	2	Beta-klotho [Anthurium amnicola]	-	-	-	-
	miR6293-x	Unigene0029947	GBP2	1609	4	2	0.002	7	3.5	PREDICTED: guanylate-binding protein 1-like [Nelumbo nucifera]	-	GO:0043229//intracellular organelle;GO:0044464//cell part;GO:0043232//intracellular non-membrane-bounded organelle;GO:0009536//plastid;GO:0043227//membrane-bounded organelle;GO:0005623//cell;GO:0043226//organelle;GO:0044444//cytoplasmic part;GO:0005737//cytoplasm;GO:0044424//intracellular part;GO:0043228//non-membrane-bounded organelle;GO:0005622//intracellular;GO:0043231//intracellular membrane-…	GO:0036094//small molecule binding;GO:0017111//nucleoside-triphosphatase activity;GO:0097367//carbohydrate derivative binding;GO:0016462//pyrophosphatase activity;GO:0001883//purine nucleoside binding;GO:0016787//hydrolase activity;GO:0097159//organic cyclic compound binding;GO:0001882//nucleoside binding;GO:0016818//hydrolase activity, acting on acid anhydrides, in phosphorus-containing anhydrid…	GO:0009987//cellular process;GO:0007017//microtubule-based process;GO:1902410//mitotic cytokinetic process;GO:0000281//mitotic cytokinesis;GO:0007049//cell cycle;GO:0044763//single-organism cellular process;GO:0044699//single-organism process;GO:0022402//cell cycle process;GO:0051301//cell division;GO:0061640//cytoskeleton-dependent cytokinesis;GO:0000278//mitotic cell cycle;GO:1903047//mitotic c…
	miR6293-x	Unigene0052201	-	830	4.5	4	0.018	1	1	transmembrane protein [Medicago truncatula]	-	-	-	-
	miR6293-x	Unigene0010239	-	864	4.5	2	0.002	3	1.5	PREDICTED: protein IQ-DOMAIN 1-like [Elaeis guineensis]	-	-	-	-
	miR6293-x	Unigene0045940	ARP5	787	4.5	4	0.018	1	1	PREDICTED: actin-related protein 5-like isoform X1 [Phoenix dactylifera]	-	GO:1902494//catalytic complex;GO:0005623//cell;GO:0032991//macromolecular complex;GO:0044424//intracellular part;GO:0033202//DNA helicase complex;GO:0043234//protein complex;GO:0044464//cell part;GO:0005622//intracellular	-	GO:0010468//regulation of gene expression;GO:0019222//regulation of metabolic process;GO:0065007//biological regulation;GO:0060255//regulation of macromolecule metabolic process;GO:0050789//regulation of biological process
	miR6293-x	Unigene0067683	-	633	4	3	0.002	3	3	--	-	-	-	-
	miR6293-x	Unigene0063148	-	585	4.5	4	0.018	1	1	PREDICTED: CLK4-associating serine/arginine rich protein isoform X2 [Juglans regia]	-	-	-	-
	miR6293-x	Unigene0029946	GBP2	516	4	2	0.002	7	3.5	PREDICTED: guanylate-binding protein 1-like [Nelumbo nucifera]	-	-	-	-
	miR6293-x	Unigene0003155	DBP	79	4	2	0.002	2	2	PREDICTED: remorin [Oryza sativa Japonica Group]	-	-	-	-
	miR6293-x	Unigene0058253	SPCC24B10.10c	354	4.5	2	0.002	2	2	PREDICTED: nuclear valosin-containing protein-like [Juglans regia]	-	-	GO:0003824//catalytic activity;GO:0032550//purine ribonucleoside binding;GO:0036094//small molecule binding;GO:0097159//organic cyclic compound binding;GO:0097367//carbohydrate derivative binding;GO:0001882//nucleoside binding;GO:1901363//heterocyclic compound binding;GO:0001883//purine nucleoside binding;GO:0032549//ribonucleoside binding;GO:0005488//binding	-
	miR6293-x	Unigene0055833	ERD15	331	4.5	2	0.002	9	9	PREDICTED: protein EARLY RESPONSIVE TO DEHYDRATION 15-like [Phoenix dactylifera]	-	-	-	-
	miR6293-x	Unigene0040513	PDPK1	563	4	4	0.018	1	1	PREDICTED: 3-phosphoinositide-dependent protein kinase 2-like [Nelumbo nucifera]	-	-	GO:0097159//organic cyclic compound binding;GO:0036094//small molecule binding;GO:0001882//nucleoside binding;GO:0016773//phosphotransferase activity, alcohol group as acceptor;GO:0005488//binding;GO:0004672//protein kinase activity;GO:0032549//ribonucleoside binding;GO:0016772//transferase activity, transferring phosphorus-containing groups;GO:0032550//purine ribonucleoside binding;GO:1901363//h…	GO:0043170//macromolecule metabolic process;GO:0006796//phosphate-containing compound metabolic process;GO:0006464//cellular protein modification process;GO:0044237//cellular metabolic process;GO:0008152//metabolic process;GO:0071704//organic substance metabolic process;GO:0009987//cellular process;GO:0036211//protein modification process;GO:0044238//primary metabolic process;GO:0006793//phosphor…
	miR6293-x	Unigene0067780	AGD12	371	4	2	0.002	2	1	PREDICTED: probable ADP-ribosylation factor GTPase-activating protein AGD13 isoform X2 [Eucalyptus grandis]	ko04144//Endocytosis//Transport and catabolism//Cellular Processes	-	-	-
	miR6293-x	Unigene0060915	TMN12	2137	4.5	4	0.018	1	1	EMP70 domain-containing protein [Cephalotus follicularis]	-	GO:0043229//intracellular organelle;GO:0030054//cell junction;GO:0031090//organelle membrane;GO:0044422//organelle part;GO:0044446//intracellular organelle part;GO:0043226//organelle;GO:0043227//membrane-bounded organelle;GO:0005911//cell-cell junction;GO:0044425//membrane part;GO:0005622//intracellular;GO:0016020//membrane;GO:0043231//intracellular membrane-bounded organelle;GO:0031984//organell…	-	-
	miR6293-x	Unigene0071610	BIP5	100	4.5	4	0.018	1	1	luminal-binding protein 5 precursor [Gossypium hirsutum]	ko04141//Protein processing in endoplasmic reticulum//Folding, sorting and degradation//Genetic Information Processing;ko03060//Protein export//Folding, sorting and degradation//Genetic Information Processing	-	GO:0005488//binding;GO:0001883//purine nucleoside binding;GO:1901363//heterocyclic compound binding;GO:0001882//nucleoside binding;GO:0032549//ribonucleoside binding;GO:0036094//small molecule binding;GO:0097367//carbohydrate derivative binding;GO:0032550//purine ribonucleoside binding;GO:0097159//organic cyclic compound binding	-
	miR6293-x	Unigene0061893	At2g20760	803	4	4	0.018	1	0.5	PREDICTED: clathrin light chain 2 [Elaeis guineensis]	-	-	-	-
	miR6293-x	Unigene0061797	-	687	4.5	2	0.002	2	2	Aminomethyl 32 [Prunus persica var. persica] [Prunus persica]	-	GO:0005737//cytoplasm;GO:0044464//cell part;GO:0044446//intracellular organelle part;GO:0005623//cell;GO:0043226//organelle;GO:0044424//intracellular part;GO:0005622//intracellular;GO:0044429//mitochondrial part;GO:0044422//organelle part;GO:0043231//intracellular membrane-bounded organelle;GO:0043229//intracellular organelle;GO:0005739//mitochondrion;GO:0043227//membrane-bounded organelle;GO:004…	-	GO:0006082//organic acid metabolic process;GO:0032787//monocarboxylic acid metabolic process;GO:0071704//organic substance metabolic process;GO:0008152//metabolic process;GO:0006520//cellular amino acid metabolic process;GO:0009069//serine family amino acid metabolic process;GO:1901615//organic hydroxy compound metabolic process;GO:0019752//carboxylic acid metabolic process;GO:0044281//small mole…
	miR6293-x	Unigene0056257	SUVH1	456	4.5	4	0.018	1	1	PREDICTED: histone-lysine N-methyltransferase, H3 lysine-9 specific SUVH1-like [Phoenix dactylifera]	ko00310//Lysine degradation//Amino acid metabolism//Metabolism	-	-	-
	miR6293-x	Unigene0088879	RPS15	519	3.5	4	0.018	1	1	40S ribosomal protein S15 [Ananas comosus]	ko03010//Ribosome//Translation//Genetic Information Processing	GO:0043226//organelle;GO:0043229//intracellular organelle;GO:0044422//organelle part;GO:0044446//intracellular organelle part;GO:0044444//cytoplasmic part;GO:0005623//cell;GO:0032991//macromolecular complex;GO:0043228//non-membrane-bounded organelle;GO:0044424//intracellular part;GO:0005622//intracellular;GO:0043232//intracellular non-membrane-bounded organelle;GO:1990904//ribonucleoprotein compl…	GO:0005198//structural molecule activity	GO:0043170//macromolecule metabolic process;GO:0008152//metabolic process;GO:0071704//organic substance metabolic process;GO:0010467//gene expression
	miR6293-x	Unigene0062193	-	397	4.5	4	0.018	1	1	PREDICTED: transmembrane protein 53-like isoform X1 [Nelumbo nucifera]	-	-	-	-
	miR6293-x	Unigene0060589	IRE1B	659	4	4	0.018	1	1	PREDICTED: serine/threonine-protein kinase/endoribonuclease IRE1a [Vitis vinifera]	ko04141//Protein processing in endoplasmic reticulum//Folding, sorting and degradation//Genetic Information Processing	-	GO:0016772//transferase activity, transferring phosphorus-containing groups;GO:0016301//kinase activity;GO:0016740//transferase activity;GO:0003824//catalytic activity	GO:0009987//cellular process;GO:0044238//primary metabolic process;GO:0071704//organic substance metabolic process;GO:0043170//macromolecule metabolic process;GO:0008152//metabolic process;GO:0044260//cellular macromolecule metabolic process;GO:0044237//cellular metabolic process
	miR6293-x	Unigene0046423	PNP2	617	4.5	4	0.018	1	1	PREDICTED: polyribonucleotide nucleotidyltransferase 2, mitochondrial [Vitis vinifera]	ko00230//Purine metabolism//Nucleotide metabolism//Metabolism;ko03018//RNA degradation//Folding, sorting and degradation//Genetic Information Processing;ko00240//Pyrimidine metabolism//Nucleotide metabolism//Metabolism	-	GO:0016740//transferase activity;GO:0016779//nucleotidyltransferase activity;GO:0097159//organic cyclic compound binding;GO:0003824//catalytic activity;GO:0005488//binding;GO:0016772//transferase activity, transferring phosphorus-containing groups;GO:1901363//heterocyclic compound binding;GO:0003676//nucleic acid binding	GO:0090501//RNA phosphodiester bond hydrolysis;GO:0009056//catabolic process;GO:0019439//aromatic compound catabolic process;GO:0044237//cellular metabolic process;GO:0044260//cellular macromolecule metabolic process;GO:0044265//cellular macromolecule catabolic process;GO:0009057//macromolecule catabolic process;GO:0006725//cellular aromatic compound metabolic process;GO:0016070//RNA metabolic pr…
	miR6293-x	Unigene0067778	AGD12	371	4	2	0.002	2	1	ARF-GAP domain 13 isoform 3 [Theobroma cacao]	ko04144//Endocytosis//Transport and catabolism//Cellular Processes	GO:0043226//organelle;GO:0044464//cell part;GO:0043227//membrane-bounded organelle;GO:0016020//membrane;GO:0043231//intracellular membrane-bounded organelle;GO:0005622//intracellular;GO:0043229//intracellular organelle;GO:0005623//cell;GO:0044424//intracellular part	GO:0008289//lipid binding;GO:0046914//transition metal ion binding;GO:0046872//metal ion binding;GO:0005488//binding;GO:0043169//cation binding;GO:0043167//ion binding	GO:0071702//organic substance transport;GO:0032502//developmental process;GO:0009987//cellular process;GO:1902578//single-organism localization;GO:0045184//establishment of protein localization;GO:0044699//single-organism process;GO:0034613//cellular protein localization;GO:0051641//cellular localization;GO:0006886//intracellular protein transport;GO:0051649//establishment of localization in cell…
	miR6293-x	Unigene0010046	-	453	4.5	4	0.018	1	1	PREDICTED: sphingomyelin phosphodiesterase 4 [Vitis vinifera]	-	-	-	-
	miR6293-x	Unigene0085523	PAH1	1044	4	4	0.018	1	1	PREDICTED: phosphatidate phosphatase PAH1-like isoform X1 [Nelumbo nucifera]	ko01100//Metabolic pathways//Global and Overview//Metabolism;ko01110//Biosynthesis of secondary metabolites//Global and Overview//Metabolism;ko00564//Glycerophospholipid metabolism//Lipid metabolism//Metabolism;ko00561//Glycerolipid metabolism//Lipid metabolism//Metabolism	-	-	-
	miR6293-x	Unigene0007697	EX1	109	4.5	4	0.018	1	1	PREDICTED: protein EXECUTER 1, chloroplastic [Nelumbo nucifera]	-	GO:0044444//cytoplasmic part;GO:0005737//cytoplasm;GO:0043229//intracellular organelle;GO:0043231//intracellular membrane-bounded organelle;GO:0005623//cell;GO:0009536//plastid;GO:0043227//membrane-bounded organelle;GO:0044424//intracellular part;GO:0044464//cell part;GO:0005622//intracellular;GO:0043226//organelle	-	GO:0050896//response to stimulus;GO:0000304//response to singlet oxygen;GO:0006950//response to stress;GO:0006979//response to oxidative stress;GO:0042221//response to chemical;GO:1901700//response to oxygen-containing compound;GO:0010035//response to inorganic substance;GO:0000302//response to reactive oxygen species
	miR6293-x	Unigene0049198	TOR1	626	4.5	2	0.002	2	2	PREDICTED: microtubule-associated protein TORTIFOLIA1-like [Nelumbo nucifera]	-	-	-	-
	miR6293-x	Unigene0073516	ABCI12	1005	4.5	4	0.018	1	1	PREDICTED: protein ABCI12, chloroplastic isoform X2 [Populus euphratica]	-	-	-	-
	miR6293-x	Unigene0067543	SCAR2	509	4	2	0.002	5	5	PREDICTED: protein SCAR2-like [Nelumbo nucifera]	-	-	-	-
	miR6293-x	Unigene0060952	SSRP1	1751	4.5	4	0.018	1	1	PREDICTED: FACT complex subunit SSRP1 [Ziziphus jujuba]	-	GO:0005622//intracellular;GO:0044464//cell part;GO:0043226//organelle;GO:0005623//cell;GO:0043227//membrane-bounded organelle;GO:0044424//intracellular part;GO:0043229//intracellular organelle;GO:0043231//intracellular membrane-bounded organelle	GO:0003824//catalytic activity;GO:0016491//oxidoreductase activity;GO:0016627//oxidoreductase activity, acting on the CH-CH group of donors;GO:0016628//oxidoreductase activity, acting on the CH-CH group of donors, NAD or NADP as acceptor	GO:0044699//single-organism process;GO:0044710//single-organism metabolic process;GO:0008152//metabolic process
	miR6293-x	Unigene0061371	RPP13L4	2338	3.5	4	0.018	1	0.5	PREDICTED: disease resistance RPP13-like protein 4 [Phoenix dactylifera]	-	-	-	-
	miR6293-x	Unigene0065785	-	16	4.5	4	0.018	1	1	--	-	-	-	-
	miR6293-x	Unigene0096175	SAUR36	525	3.5	4	0.018	1	1	PREDICTED: auxin-responsive protein SAUR36-like [Nelumbo nucifera]	ko04075//Plant hormone signal transduction//Signal transduction//Environmental Information Processing	-	-	-
	miR6293-x	Unigene0023303	-	520	4.5	4	0.018	1	1	Methylenetetrahydrofolate--tRNA-(uracil-5-)-methyltransferase TrmFO, partial [Anthurium amnicola]	-	-	-	-
	miR6293-x	Unigene0007481	IP5P2	1956	4	2	0.002	2	2	PREDICTED: type I inositol polyphosphate 5-phosphatase 2 [Theobroma cacao]	-	-	GO:0042578//phosphoric ester hydrolase activity;GO:0016788//hydrolase activity, acting on ester bonds;GO:0052745//inositol phosphate phosphatase activity;GO:0003824//catalytic activity;GO:0016791//phosphatase activity;GO:0016787//hydrolase activity	GO:0001101//response to acid chemical;GO:1901615//organic hydroxy compound metabolic process;GO:0051716//cellular response to stimulus;GO:0006793//phosphorus metabolic process;GO:0007154//cell communication;GO:0044281//small molecule metabolic process;GO:0071704//organic substance metabolic process;GO:0019637//organophosphate metabolic process;GO:0009719//response to endogenous stimulus;GO:005079…
	miR6293-x	Unigene0075819	-	211	4.5	4	0.018	1	1	--	-	-	-	-
	miR6293-x	Unigene0039783	CYP19-4	567	4	2	0.002	8	4	PREDICTED: peptidyl-prolyl cis-trans isomerase CYP20-1 [Nicotiana sylvestris]	-	-	-	-
	miR6293-x	Unigene0081734	TEB	846	4.5	2	0.002	2	2	PREDICTED: helicase and polymerase-containing protein TEBICHI isoform X1 [Nelumbo nucifera]	-	-	-	-
	miR6293-x	Unigene0045981	CSN5B	793	4	4	0.018	1	1	PREDICTED: COP9 signalosome complex subunit 5b-like [Nelumbo nucifera]	-	-	-	-
	miR6293-x	Unigene0074750	Os07g0555200	2278	4.5	4	0.018	1	1	PREDICTED: eukaryotic translation initiation factor 4G-like isoform X3 [Nelumbo nucifera]	ko03013//RNA transport//Translation//Genetic Information Processing	-	-	-
	miR6293-x	Unigene0084131	-	942	4.5	4	0.018	1	1	--	-	-	-	-
	miR6293-x	Unigene0077908	Atad1	1365	4.5	2	0.002	2	2	AAA domain-containing protein/FHA domain-containing protein [Cephalotus follicularis]	-	-	GO:0003824//catalytic activity;GO:0016787//hydrolase activity	-
	miR6293-x	Unigene0054987	AAPT1	1105	4.5	2	0.002	3	1	PREDICTED: choline/ethanolaminephosphotransferase 1 [Ziziphus jujuba]	ko01100//Metabolic pathways//Global and Overview//Metabolism;ko01110//Biosynthesis of secondary metabolites//Global and Overview//Metabolism;ko00564//Glycerophospholipid metabolism//Lipid metabolism//Metabolism;ko00565//Ether lipid metabolism//Lipid metabolism//Metabolism	-	GO:0016740//transferase activity;GO:0003824//catalytic activity;GO:0016772//transferase activity, transferring phosphorus-containing groups	-
	miR6293-x	Unigene0049385	CYP80B2	671	4	2	0.002	10	10	PREDICTED: probable (S)-N-methylcoclaurine 3'-hydroxylase isozyme 2 [Populus euphratica]	-	-	GO:0016705//oxidoreductase activity, acting on paired donors, with incorporation or reduction of molecular oxygen;GO:0016491//oxidoreductase activity;GO:0043167//ion binding;GO:0005488//binding;GO:0003824//catalytic activity;GO:0046872//metal ion binding;GO:0043169//cation binding	-
	miR6293-x	Unigene0068905	UBA2	893	4	2	0.002	3	3	PREDICTED: ubiquitin-activating enzyme E1 1-like [Phoenix dactylifera]	ko04120//Ubiquitin mediated proteolysis//Folding, sorting and degradation//Genetic Information Processing	-	-	-
	miR6293-x	Unigene0057452	TOM2A	410	3	2	0.002	3	3	PREDICTED: tobamovirus multiplication protein 2A-like [Nelumbo nucifera]	-	-	-	-
	miR6293-x	Unigene0061894	Os04g0679100	180	4	4	0.018	1	0.5	PREDICTED: clathrin light chain 2 [Elaeis guineensis]	-	-	-	-
	miR6293-x	Unigene0104401	TPIP1	523	3.5	2	0.002	7	7	PREDICTED: triosephosphate isomerase, cytosolic [Prunus mume]	ko01100//Metabolic pathways//Global and Overview//Metabolism;ko01110//Biosynthesis of secondary metabolites//Global and Overview//Metabolism;ko01130//Biosynthesis of antibiotics//Global and Overview//Metabolism;ko01120//Microbial metabolism in diverse environments//Global and Overview//Metabolism;ko01200//Carbon metabolism//Global and Overview//Metabolism;ko01230//Biosynthesis of amino acids//Glo…	-	-	-
	miR6293-x	Unigene0096654	At1g09380	282	4.5	2	0.002	7	7	PREDICTED: WAT1-related protein At1g09380-like [Musa acuminata subsp. malaccensis] [Musa acuminata]	-	-	-	-
	miR6293-x	Unigene0067768	TAF5	468	4	4	0.018	1	1	PREDICTED: transcription initiation factor TFIID subunit 5 [Vitis vinifera]	ko03022//Basal transcription factors//Transcription//Genetic Information Processing	-	GO:0003824//catalytic activity	GO:0090304//nucleic acid metabolic process;GO:0044260//cellular macromolecule metabolic process;GO:0044249//cellular biosynthetic process;GO:0006807//nitrogen compound metabolic process;GO:0019438//aromatic compound biosynthetic process;GO:1901362//organic cyclic compound biosynthetic process;GO:0060255//regulation of macromolecule metabolic process;GO:0009058//biosynthetic process;GO:0097659//nu…
	miR6293-x	Unigene0096277	THFS	1438	4.5	4	0.018	1	1	Formate--tetrahydrofolate ligase, partial [Anthurium amnicola]	ko01100//Metabolic pathways//Global and Overview//Metabolism;ko01120//Microbial metabolism in diverse environments//Global and Overview//Metabolism;ko01200//Carbon metabolism//Global and Overview//Metabolism;ko00670//One carbon pool by folate//Metabolism of cofactors and vitamins//Metabolism	-	GO:0036094//small molecule binding;GO:0032550//purine ribonucleoside binding;GO:0001883//purine nucleoside binding;GO:0032549//ribonucleoside binding;GO:0097367//carbohydrate derivative binding;GO:0001882//nucleoside binding;GO:0097159//organic cyclic compound binding;GO:0005488//binding;GO:1901363//heterocyclic compound binding	GO:0034641//cellular nitrogen compound metabolic process;GO:0044281//small molecule metabolic process;GO:0051186//cofactor metabolic process;GO:1901360//organic cyclic compound metabolic process;GO:0044237//cellular metabolic process;GO:0006732//coenzyme metabolic process;GO:0043436//oxoacid metabolic process;GO:0006725//cellular aromatic compound metabolic process;GO:0006575//cellular modified a…
	miR6293-x	Unigene0068370	At1g03560	326	4	2	0.002	3	3	PREDICTED: pentatricopeptide repeat-containing protein At1g03560, mitochondrial [Nelumbo nucifera]	-	-	-	-
	miR6293-x	Unigene0055497	PLDDELTA	837	4.5	4	0.018	1	1	PREDICTED: phospholipase D delta [Vitis vinifera]	ko01100//Metabolic pathways//Global and Overview//Metabolism;ko01110//Biosynthesis of secondary metabolites//Global and Overview//Metabolism;ko04144//Endocytosis//Transport and catabolism//Cellular Processes;ko00564//Glycerophospholipid metabolism//Lipid metabolism//Metabolism;ko00565//Ether lipid metabolism//Lipid metabolism//Metabolism	-	GO:0043167//ion binding;GO:0016298//lipase activity;GO:0004620//phospholipase activity;GO:0043169//cation binding;GO:0046872//metal ion binding;GO:0016787//hydrolase activity;GO:0005488//binding;GO:0016788//hydrolase activity, acting on ester bonds;GO:0003824//catalytic activity	GO:0044699//single-organism process;GO:0006629//lipid metabolic process;GO:0009987//cellular process;GO:0008152//metabolic process;GO:0044710//single-organism metabolic process;GO:0046486//glycerolipid metabolic process;GO:0006644//phospholipid metabolic process;GO:0006650//glycerophospholipid metabolic process;GO:0071704//organic substance metabolic process;GO:0006793//phosphorus metabolic proce…
	miR6293-x	Unigene0011040	-	2134	4.5	4	0.018	1	1	PREDICTED: uncharacterized protein LOC104600519 isoform X1 [Nelumbo nucifera]	-	-	-	-
	miR6293-x	Unigene0065040	CNX1	782	4	2	0.002	16	16	PREDICTED: calnexin homolog [Elaeis guineensis]	ko04141//Protein processing in endoplasmic reticulum//Folding, sorting and degradation//Genetic Information Processing;ko04145//Phagosome//Transport and catabolism//Cellular Processes	GO:0043226//organelle;GO:0005623//cell;GO:0005622//intracellular;GO:0043231//intracellular membrane-bounded organelle;GO:0044424//intracellular part;GO:0044464//cell part;GO:0043229//intracellular organelle;GO:0043227//membrane-bounded organelle	GO:0005515//protein binding;GO:0005488//binding	GO:0071704//organic substance metabolic process;GO:0009987//cellular process;GO:0044237//cellular metabolic process;GO:0044267//cellular protein metabolic process;GO:0043170//macromolecule metabolic process;GO:0019538//protein metabolic process;GO:0008152//metabolic process;GO:0044260//cellular macromolecule metabolic process;GO:0044238//primary metabolic process
	miR6293-x	Unigene0081995	-	2397	4.5	4	0.018	1	1	--	-	-	-	-
	miR6293-x	Unigene0038940	-	2077	4.5	4	0.018	1	0.5	PREDICTED: uncharacterized protein LOC100260704 isoform X2 [Vitis vinifera]	-	-	-	-
	miR6293-x	Unigene0068754	ACO	791	4.5	4	0.018	1	1	ACC oxidase 5 [Actinidia chinensis]	ko01100//Metabolic pathways//Global and Overview//Metabolism;ko01110//Biosynthesis of secondary metabolites//Global and Overview//Metabolism;ko00270//Cysteine and methionine metabolism//Amino acid metabolism//Metabolism	-	GO:0003824//catalytic activity;GO:0043169//cation binding;GO:0043167//ion binding;GO:0005488//binding;GO:0016491//oxidoreductase activity;GO:0016705//oxidoreductase activity, acting on paired donors, with incorporation or reduction of molecular oxygen	GO:0044699//single-organism process;GO:0044710//single-organism metabolic process;GO:0008152//metabolic process
	miR6293-x	Unigene0076082	-	786	4	4	0.018	1	1	PREDICTED: uncharacterized protein LOC103705694 [Phoenix dactylifera]	-	-	-	-
	miR6293-x	Unigene0064832	ORP1C	586	4.5	4	0.018	1	1	PREDICTED: oxysterol-binding protein-related protein 1C [Amborella trichopoda]	-	-	-	-
	miR6293-x	Unigene0033576	OST3B	83	4	4	0.018	1	1	PREDICTED: probable dolichyl-diphosphooligosaccharide--protein glycosyltransferase subunit 3B [Nelumbo nucifera]	ko01100//Metabolic pathways//Global and Overview//Metabolism;ko04141//Protein processing in endoplasmic reticulum//Folding, sorting and degradation//Genetic Information Processing;ko00510//N-Glycan biosynthesis//Glycan biosynthesis and metabolism//Metabolism	-	-	-
	miR6293-x	Unigene0049395	FH6	225	3	4	0.018	1	1	PREDICTED: formin-like protein 6 [Nelumbo nucifera]	-	GO:0043226//organelle;GO:0044464//cell part;GO:0005622//intracellular;GO:0044424//intracellular part;GO:0043229//intracellular organelle;GO:0015629//actin cytoskeleton;GO:0044444//cytoplasmic part;GO:0043232//intracellular non-membrane-bounded organelle;GO:0043231//intracellular membrane-bounded organelle;GO:0044425//membrane part;GO:0016020//membrane;GO:0043228//non-membrane-bounded organelle;GO…	-	GO:0044699//single-organism process;GO:0071840//cellular component organization or biogenesis;GO:0007015//actin filament organization;GO:0030036//actin cytoskeleton organization;GO:0007010//cytoskeleton organization;GO:0016043//cellular component organization;GO:0006996//organelle organization;GO:0030029//actin filament-based process;GO:0043933//macromolecular complex subunit organization;GO:0009…
	miR6293-x	Unigene0009052	NUB1	1355	4	2	0.002	4	4	PREDICTED: NEDD8 ultimate buster 1 [Nelumbo nucifera]	-	-	-	-
	miR6293-x	Unigene0067543	SCAR2	3156	4.5	2	0.002	3	3	PREDICTED: protein SCAR2-like [Nelumbo nucifera]	-	-	-	-
	miR6293-x	Unigene0062726	ETO1	1750	4.5	4	0.018	1	1	PREDICTED: ethylene-overproduction protein 1 [Nelumbo nucifera]	-	-	GO:0005515//protein binding;GO:0005488//binding	GO:0003006//developmental process involved in reproduction;GO:0044260//cellular macromolecule metabolic process;GO:0043170//macromolecule metabolic process;GO:0030163//protein catabolic process;GO:0099402//plant organ development;GO:0042594//response to starvation;GO:0000003//reproduction;GO:0009057//macromolecule catabolic process;GO:0043632//modification-dependent macromolecule catabolic proces…
	miR6293-x	Unigene0051264	TPIP1	548	4.5	3	0	6	6	triosephosphate isomerase [Petunia x hybrida]	ko01100//Metabolic pathways//Global and Overview//Metabolism;ko01110//Biosynthesis of secondary metabolites//Global and Overview//Metabolism;ko01130//Biosynthesis of antibiotics//Global and Overview//Metabolism;ko01120//Microbial metabolism in diverse environments//Global and Overview//Metabolism;ko01200//Carbon metabolism//Global and Overview//Metabolism;ko01230//Biosynthesis of amino acids//Glo…	-	GO:0016861//intramolecular oxidoreductase activity, interconverting aldoses and ketoses;GO:0016853//isomerase activity;GO:0016860//intramolecular oxidoreductase activity;GO:0003824//catalytic activity	GO:0044699//single-organism process;GO:0071704//organic substance metabolic process;GO:0006090//pyruvate metabolic process;GO:0044281//small molecule metabolic process;GO:0008152//metabolic process;GO:0019752//carboxylic acid metabolic process;GO:0044710//single-organism metabolic process;GO:0006082//organic acid metabolic process;GO:0043436//oxoacid metabolic process;GO:0044763//single-organism …
	miR6293-x	Unigene0068802	NOP5-2	225	3.5	2	0.002	5	5	PREDICTED: probable nucleolar protein 5-2 isoform X2 [Nelumbo nucifera]	ko03008//Ribosome biogenesis in eukaryotes//Translation//Genetic Information Processing	-	-	-
	miR6293-x	Unigene0053839	TSJT1	23	4.5	4	0.018	1	1	PREDICTED: stem-specific protein TSJT1 [Amborella trichopoda]	-	GO:0005623//cell;GO:0016020//membrane;GO:0005622//intracellular;GO:0044464//cell part;GO:0044424//intracellular part	-	GO:0010035//response to inorganic substance;GO:0050896//response to stimulus;GO:0009725//response to hormone;GO:0042221//response to chemical;GO:0010038//response to metal ion;GO:0010033//response to organic substance;GO:0009719//response to endogenous stimulus
	miR6293-x	Unigene0047814	-	291	3.5	2	0.002	7	7	--	-	-	-	-
	miR6293-x	Unigene0048444	NSF	429	4	2	0.002	9	9	PREDICTED: vesicle-fusing ATPase-like isoform X1 [Elaeis guineensis]	-	-	-	-
	miR6293-x	Unigene0067127	DCL4	568	3.5	2	0.002	7	3.5	PREDICTED: endoribonuclease Dicer homolog 4 isoform X2 [Elaeis guineensis]	-	-	GO:0004518//nuclease activity;GO:0016787//hydrolase activity;GO:0016788//hydrolase activity, acting on ester bonds;GO:0004519//endonuclease activity;GO:0005488//binding;GO:1901363//heterocyclic compound binding;GO:0097159//organic cyclic compound binding;GO:0003824//catalytic activity	GO:0006355//regulation of transcription, DNA-templated;GO:0070887//cellular response to chemical stimulus;GO:0050794//regulation of cellular process;GO:0010629//negative regulation of gene expression;GO:0044707//single-multicellular organism process;GO:0040029//regulation of gene expression, epigenetic;GO:0031326//regulation of cellular biosynthetic process;GO:0044237//cellular metabolic process;…
	miR6293-x	Unigene0046608	IQD32	864	4.5	2	0.002	3	1.5	PREDICTED: protein IQ-DOMAIN 14-like [Nelumbo nucifera]	-	-	-	-
	miR6293-x	Unigene0108071	TKRP125	1929	4	2	0.002	4	4	PREDICTED: kinesin-like protein KIN-5D isoform X2 [Nelumbo nucifera]	-	GO:0005856//cytoskeleton;GO:0044446//intracellular organelle part;GO:0043228//non-membrane-bounded organelle;GO:0005623//cell;GO:0005875//microtubule associated complex;GO:0044422//organelle part;GO:0043232//intracellular non-membrane-bounded organelle;GO:0015630//microtubule cytoskeleton;GO:0032991//macromolecular complex;GO:0043226//organelle;GO:0043234//protein complex;GO:0044424//intracellula…	GO:0001882//nucleoside binding;GO:0036094//small molecule binding;GO:0015631//tubulin binding;GO:0016817//hydrolase activity, acting on acid anhydrides;GO:0032549//ribonucleoside binding;GO:1901363//heterocyclic compound binding;GO:0003824//catalytic activity;GO:0005515//protein binding;GO:0008092//cytoskeletal protein binding;GO:0016818//hydrolase activity, acting on acid anhydrides, in phosphor…	GO:0007017//microtubule-based process;GO:0016043//cellular component organization;GO:0009987//cellular process;GO:0044699//single-organism process;GO:0071840//cellular component organization or biogenesis;GO:0044763//single-organism cellular process;GO:0007010//cytoskeleton organization;GO:1902589//single-organism organelle organization;GO:0000226//microtubule cytoskeleton organization;GO:0006996…
	miR6293-x	Unigene0055933	At5g49980	113	3	4	0.018	1	1	PREDICTED: transport inhibitor response 1-like protein [Vitis vinifera]	-	-	-	-
	miR6293-x	Unigene0065034	-	546	4.5	4	0.018	1	1	Sn1-specific diacylglycerol lipase beta, partial [Anthurium amnicola]	-	-	-	GO:0008152//metabolic process;GO:0044699//single-organism process;GO:0006629//lipid metabolic process;GO:0044238//primary metabolic process;GO:0044710//single-organism metabolic process;GO:0071704//organic substance metabolic process
	miR6293-x	Unigene0046895	CBWD2	492	4	4	0.018	1	1	PREDICTED: COBW domain-containing protein 1-like isoform X1 [Nelumbo nucifera]	-	-	-	-
	miR6293-x	Unigene0067404	-	1186	4	2	0.002	2	2	--	-	-	-	-
	miR6293-x	Unigene0068656	MYB44	1744	3.5	4	0.018	1	1	PREDICTED: myb-related protein 330-like [Nelumbo nucifera]	-	-	-	-
	miR6293-x	Unigene0067483	TAF2	3522	4	2	0.002	2	2	PREDICTED: transcription initiation factor TFIID subunit 2 isoform X1 [Nelumbo nucifera]	ko03022//Basal transcription factors//Transcription//Genetic Information Processing	-	-	-
	miR6293-x	Unigene0062159	-	242	3.5	4	0.018	1	1	--	-	-	-	-
	miR6293-x	Unigene0008908	At4g13360	566	4	2	0.002	2	2	PREDICTED: 3-hydroxyisobutyryl-CoA hydrolase-like protein 3, mitochondrial [Amborella trichopoda]	ko01100//Metabolic pathways//Global and Overview//Metabolism;ko01200//Carbon metabolism//Global and Overview//Metabolism;ko00410//beta-Alanine metabolism//Metabolism of other amino acids//Metabolism;ko00280//Valine, leucine and isoleucine degradation//Amino acid metabolism//Metabolism;ko00640//Propanoate metabolism//Carbohydrate metabolism//Metabolism	-	-	-
	miR6293-x	Unigene0056775	RBL20	105	4.5	4	0.018	1	1	PREDICTED: rhomboid-like protein 20 [Vitis vinifera]	-	-	-	-
	miR6293-x	Unigene0067512	TOM2A	434	3.5	2	0.002	4	4	PREDICTED: tobamovirus multiplication protein 2A-like [Nelumbo nucifera]	-	-	-	-
	miR6293-x	Unigene0000123	-	776	4.5	4	0.018	1	1	--	-	-	-	-
	miR6293-x	Unigene0026971	grpE	835	4.5	4	0.018	1	1	PREDICTED: protein GrpE-like [Phoenix dactylifera]	-	-	-	-
	miR6293-x	Unigene0067126	DCL4	2127	3.5	2	0.002	7	3.5	PREDICTED: endoribonuclease Dicer homolog 4 isoform X2 [Elaeis guineensis]	-	-	GO:1901363//heterocyclic compound binding;GO:0097159//organic cyclic compound binding;GO:0005488//binding;GO:0016788//hydrolase activity, acting on ester bonds;GO:0016787//hydrolase activity;GO:0003824//catalytic activity;GO:0004519//endonuclease activity;GO:0004518//nuclease activity	GO:0008152//metabolic process;GO:0090305//nucleic acid phosphodiester bond hydrolysis;GO:0019219//regulation of nucleobase-containing compound metabolic process;GO:0048856//anatomical structure development;GO:0035194//posttranscriptional gene silencing by RNA;GO:0050789//regulation of biological process;GO:0071704//organic substance metabolic process;GO:0016246//RNA interference;GO:0010556//regul…
	miR6293-x	Unigene0079994	HLJ1	3903	4.5	4	0.018	1	1	DnaJ subfamily B member 14 [Anthurium amnicola]	-	-	-	-
	miR6293-x	Unigene0061791	TUBB7	719	4.5	3	0.002	3	3	PREDICTED: tubulin beta chain [Vigna radiata var. radiata] [Vigna radiata]	ko04145//Phagosome//Transport and catabolism//Cellular Processes	GO:0043229//intracellular organelle;GO:0032991//macromolecular complex;GO:0044464//cell part;GO:0044424//intracellular part;GO:0043226//organelle;GO:0005622//intracellular;GO:0005856//cytoskeleton;GO:0043232//intracellular non-membrane-bounded organelle;GO:0015630//microtubule cytoskeleton;GO:0005623//cell;GO:0043228//non-membrane-bounded organelle	GO:0036094//small molecule binding;GO:0017111//nucleoside-triphosphatase activity;GO:0001883//purine nucleoside binding;GO:0016787//hydrolase activity;GO:0032550//purine ribonucleoside binding;GO:0003824//catalytic activity;GO:0097367//carbohydrate derivative binding;GO:0005198//structural molecule activity;GO:0097159//organic cyclic compound binding;GO:1901363//heterocyclic compound binding;GO:0…	GO:0065003//macromolecular complex assembly;GO:0034622//cellular macromolecular complex assembly;GO:0006461//protein complex assembly;GO:0044763//single-organism cellular process;GO:0071840//cellular component organization or biogenesis;GO:0043933//macromolecular complex subunit organization;GO:0044085//cellular component biogenesis;GO:0044699//single-organism process;GO:0009987//cellular process…
	miR6293-x	Unigene0082761	AUL1	2352	3.5	4	0.018	1	1	PREDICTED: auxilin-like protein 1 [Nelumbo nucifera]	-	-	-	-
	miR6293-x	Unigene0054988	AAPT1	1922	4.5	2	0.002	3	1	PREDICTED: choline/ethanolaminephosphotransferase 1 isoform X2 [Elaeis guineensis]	ko01100//Metabolic pathways//Global and Overview//Metabolism;ko01110//Biosynthesis of secondary metabolites//Global and Overview//Metabolism;ko00564//Glycerophospholipid metabolism//Lipid metabolism//Metabolism;ko00565//Ether lipid metabolism//Lipid metabolism//Metabolism	-	GO:0003824//catalytic activity;GO:0016740//transferase activity;GO:0016772//transferase activity, transferring phosphorus-containing groups	-
	miR6293-x	Unigene0001146	UPF2	2724	4.5	4	0.018	1	1	PREDICTED: regulator of nonsense transcripts UPF2 isoform X1 [Nelumbo nucifera]	ko03013//RNA transport//Translation//Genetic Information Processing;ko03015//mRNA surveillance pathway//Translation//Genetic Information Processing	GO:0005622//intracellular;GO:0043228//non-membrane-bounded organelle;GO:0044464//cell part;GO:0043227//membrane-bounded organelle;GO:0005623//cell;GO:0044444//cytoplasmic part;GO:0044424//intracellular part;GO:0043232//intracellular non-membrane-bounded organelle;GO:0043226//organelle;GO:0005737//cytoplasm;GO:0043229//intracellular organelle;GO:0043231//intracellular membrane-bounded organelle	GO:0005488//binding;GO:1901363//heterocyclic compound binding;GO:0003676//nucleic acid binding;GO:0097159//organic cyclic compound binding	GO:0046394//carboxylic acid biosynthetic process;GO:0010033//response to organic substance;GO:0006807//nitrogen compound metabolic process;GO:0009617//response to bacterium;GO:0006082//organic acid metabolic process;GO:1901575//organic substance catabolic process;GO:0050794//regulation of cellular process;GO:0044248//cellular catabolic process;GO:0009057//macromolecule catabolic process;GO:190156…
	miR6293-x	Unigene0025953	RPN7	1023	4.5	2	0.002	8	8	PREDICTED: 26S proteasome non-ATPase regulatory subunit 6 homolog [Pyrus x bretschneideri]	ko03050//Proteasome//Folding, sorting and degradation//Genetic Information Processing	-	-	-
	miR6293-x	Unigene0004444	-	212	4.5	4	0.018	1	1	--	-	-	-	-
	miR6293-x	Unigene0054989	AAPT1	966	4.5	2	0.002	3	1	PREDICTED: choline/ethanolaminephosphotransferase 1 isoform X2 [Elaeis guineensis]	ko01100//Metabolic pathways//Global and Overview//Metabolism;ko01110//Biosynthesis of secondary metabolites//Global and Overview//Metabolism;ko00564//Glycerophospholipid metabolism//Lipid metabolism//Metabolism;ko00565//Ether lipid metabolism//Lipid metabolism//Metabolism	-	GO:0016740//transferase activity;GO:0003824//catalytic activity;GO:0016772//transferase activity, transferring phosphorus-containing groups	-
	miR6293-x	Unigene0067062	FH3	338	4	4	0.018	1	1	PREDICTED: formin-like protein 14 isoform X1 [Nelumbo nucifera]	-	GO:0005737//cytoplasm;GO:0015630//microtubule cytoskeleton;GO:0043226//organelle;GO:0044424//intracellular part;GO:0015629//actin cytoskeleton;GO:0043232//intracellular non-membrane-bounded organelle;GO:0044444//cytoplasmic part;GO:0005856//cytoskeleton;GO:0043228//non-membrane-bounded organelle;GO:0005623//cell;GO:0043229//intracellular organelle;GO:0044464//cell part;GO:0005622//intracellular	GO:0016787//hydrolase activity;GO:0008092//cytoskeletal protein binding;GO:0003779//actin binding;GO:0016791//phosphatase activity;GO:0003824//catalytic activity;GO:0005515//protein binding;GO:0016788//hydrolase activity, acting on ester bonds;GO:0042578//phosphoric ester hydrolase activity;GO:0005488//binding;GO:0015631//tubulin binding	GO:0044699//single-organism process;GO:0009555//pollen development;GO:0006793//phosphorus metabolic process;GO:0048229//gametophyte development;GO:0009987//cellular process;GO:0007010//cytoskeleton organization;GO:0071822//protein complex subunit organization;GO:0016043//cellular component organization;GO:0032501//multicellular organismal process;GO:0071840//cellular component organization or bio…
	miR6293-x	Unigene0088474	At4g23740	1395	4.5	2	0.002	4	4	PREDICTED: probable inactive receptor kinase At4g23740 [Nelumbo nucifera]	-	GO:0044425//membrane part;GO:0031224//intrinsic component of membrane;GO:0016020//membrane	GO:0003824//catalytic activity;GO:0005488//binding;GO:0097159//organic cyclic compound binding;GO:0016740//transferase activity;GO:0036094//small molecule binding;GO:0016772//transferase activity, transferring phosphorus-containing groups;GO:0016301//kinase activity;GO:0001882//nucleoside binding;GO:0001883//purine nucleoside binding;GO:0097367//carbohydrate derivative binding;GO:1901363//heteroc…	GO:0006464//cellular protein modification process;GO:0008152//metabolic process;GO:0048509//regulation of meristem development;GO:0043170//macromolecule metabolic process;GO:0050789//regulation of biological process;GO:0019538//protein metabolic process;GO:0065007//biological regulation;GO:0050793//regulation of developmental process;GO:0071704//organic substance metabolic process;GO:0044267//cel…
	miR6293-x	Unigene0097022	AKR2	997	4	4	0.018	1	1	PREDICTED: ankyrin repeat domain-containing protein 2 [Jatropha curcas]	-	-	-	-
	miR6293-x	Unigene0080114	EDR2	217	4	2	0.002	2	2	PREDICTED: protein ENHANCED DISEASE RESISTANCE 2-like isoform X1 [Phoenix dactylifera]	-	GO:0016020//membrane	GO:0005488//binding	GO:0009058//biosynthetic process;GO:0009987//cellular process;GO:0008152//metabolic process;GO:0019752//carboxylic acid metabolic process;GO:0044763//single-organism cellular process;GO:0046394//carboxylic acid biosynthetic process;GO:0006790//sulfur compound metabolic process;GO:0044249//cellular biosynthetic process;GO:0000097//sulfur amino acid biosynthetic process;GO:0000096//sulfur amino aci…
	miR6293-x	Unigene0007730	DR1	139	4.5	4	0.018	1	1	PREDICTED: protein Dr1 homolog [Amborella trichopoda]	-	GO:0043229//intracellular organelle;GO:0043227//membrane-bounded organelle;GO:0043226//organelle;GO:0044464//cell part;GO:0005623//cell;GO:0005622//intracellular;GO:0043231//intracellular membrane-bounded organelle;GO:0044424//intracellular part	GO:0046983//protein dimerization activity;GO:0003676//nucleic acid binding;GO:0005515//protein binding;GO:0003677//DNA binding;GO:1901363//heterocyclic compound binding;GO:0005488//binding;GO:0097159//organic cyclic compound binding	-
	miR6293-x	Unigene0071245	UVR8	1192	4	4	0.018	1	1	PREDICTED: ultraviolet-B receptor UVR8 isoform X2 [Elaeis guineensis]	-	-	-	-
	miR6293-x	Unigene0032867	At5g14770	597	4.5	2	0.002	4	4	PREDICTED: pentatricopeptide repeat-containing protein At5g14770, mitochondrial [Phoenix dactylifera]	-	-	-	-
	miR6293-x	Unigene0061372	RPP13L4	2338	3.5	4	0.018	1	0.5	PREDICTED: disease resistance RPP13-like protein 4 [Phoenix dactylifera]	-	-	-	-
	miR6293-x	Unigene0101391	-	557	4	0	0	21	21	--	-	-	-	-
	miR6293-x	Unigene0064434	-	1054	4.5	4	0.018	1	1	--	-	-	-	-
miR9566-y	miR9566-y	Unigene0044728	BASS1	1021	4	4	0.004	1	1	Sodium Bile acid symporter family isoform 1 [Theobroma cacao]	-	GO:0043227//membrane-bounded organelle;GO:0043231//intracellular membrane-bounded organelle;GO:0031224//intrinsic component of membrane;GO:0005737//cytoplasm;GO:0009526//plastid envelope;GO:0043229//intracellular organelle;GO:0044425//membrane part;GO:0044422//organelle part;GO:0005623//cell;GO:0005622//intracellular;GO:0044435//plastid part;GO:0044444//cytoplasmic part;GO:0044464//cell part;GO:0…	GO:0015291//secondary active transmembrane transporter activity;GO:0015075//ion transmembrane transporter activity;GO:0008324//cation transmembrane transporter activity;GO:0015370//solute:sodium symporter activity;GO:0015077//monovalent inorganic cation transmembrane transporter activity;GO:0022892//substrate-specific transporter activity;GO:0022804//active transmembrane transporter activity;GO:0…	GO:0033036//macromolecule localization;GO:0006812//cation transport;GO:0010876//lipid localization;GO:0044699//single-organism process;GO:0006869//lipid transport;GO:0071702//organic substance transport;GO:1902578//single-organism localization;GO:0030001//metal ion transport;GO:0051234//establishment of localization;GO:0044765//single-organism transport;GO:0006810//transport;GO:0051179//localizat…
	miR9566-y	Unigene0067298	At5g16730	2596	4.5	4	0.004	1	1	PREDICTED: WEB family protein At3g02930, chloroplastic-like [Nelumbo nucifera]	-	-	-	-
	miR9566-y	Unigene0081852	AKT5	2883	4.5	4	0.004	1	1	PREDICTED: potassium channel KAT3-like [Nelumbo nucifera]	-	-	-	GO:0051179//localization;GO:1902578//single-organism localization;GO:0006811//ion transport;GO:0044699//single-organism process;GO:0044765//single-organism transport;GO:0051234//establishment of localization;GO:0006810//transport
	miR9566-y	Unigene0030445	CYP40	687	4.5	2	0.002	2	2	PREDICTED: peptidyl-prolyl cis-trans isomerase CYP40 [Nelumbo nucifera]	-	-	GO:0003824//catalytic activity;GO:0016859//cis-trans isomerase activity;GO:0016853//isomerase activity	GO:0071704//organic substance metabolic process;GO:0044267//cellular protein metabolic process;GO:0008152//metabolic process;GO:0019538//protein metabolic process;GO:0044237//cellular metabolic process;GO:0043170//macromolecule metabolic process;GO:0044260//cellular macromolecule metabolic process;GO:0009987//cellular process;GO:0044238//primary metabolic process
	miR9566-y	Unigene0006122	PREP1	2664	4.5	2	0.002	4	4	PREDICTED: presequence protease 2, chloroplastic/mitochondrial [Nelumbo nucifera]	-	-	-	-
	miR9566-y	Unigene0069473	TIR1	3061	4	2	0.002	2	2	PREDICTED: protein TRANSPORT INHIBITOR RESPONSE 1-like [Phoenix dactylifera]	ko04075//Plant hormone signal transduction//Signal transduction//Environmental Information Processing	-	-	GO:0010033//response to organic substance;GO:0009719//response to endogenous stimulus;GO:0070887//cellular response to chemical stimulus;GO:0023052//signaling;GO:0042221//response to chemical;GO:0050789//regulation of biological process;GO:0044763//single-organism cellular process;GO:0007154//cell communication;GO:0044699//single-organism process;GO:0050896//response to stimulus;GO:0044700//singl…
	miR9566-y	Unigene0072407	BHLH49	325	4.5	2	0.002	2	2	PREDICTED: transcription factor bHLH49 [Nelumbo nucifera]	-	-	-	-
	miR9566-y	Unigene0079199	ARF18	686	4	4	0.004	1	1	PREDICTED: auxin response factor 18-like [Nelumbo nucifera]	-	GO:0005622//intracellular;GO:0043229//intracellular organelle;GO:0043226//organelle;GO:0044424//intracellular part;GO:0043227//membrane-bounded organelle;GO:0043231//intracellular membrane-bounded organelle;GO:0005623//cell;GO:0044464//cell part	GO:0005515//protein binding;GO:0005488//binding	GO:0050794//regulation of cellular process;GO:0009059//macromolecule biosynthetic process;GO:0070887//cellular response to chemical stimulus;GO:0009755//hormone-mediated signaling pathway;GO:0009058//biosynthetic process;GO:0050896//response to stimulus;GO:0043170//macromolecule metabolic process;GO:0044249//cellular biosynthetic process;GO:0034645//cellular macromolecule biosynthetic process;GO:…
	miR9566-y	Unigene0067985	At4g26100	577	4.5	4	0.004	1	1	PREDICTED: casein kinase 1-like protein 10 [Nelumbo nucifera]	-	-	GO:1901363//heterocyclic compound binding;GO:0001883//purine nucleoside binding;GO:0032550//purine ribonucleoside binding;GO:0001882//nucleoside binding;GO:0003824//catalytic activity;GO:0016301//kinase activity;GO:0032549//ribonucleoside binding;GO:0036094//small molecule binding;GO:0005488//binding;GO:0016740//transferase activity;GO:0097159//organic cyclic compound binding;GO:0016773//phosphot…	GO:0019538//protein metabolic process;GO:0043412//macromolecule modification;GO:0043170//macromolecule metabolic process;GO:0044260//cellular macromolecule metabolic process;GO:0044267//cellular protein metabolic process;GO:0006793//phosphorus metabolic process;GO:0006464//cellular protein modification process;GO:0009987//cellular process;GO:0071704//organic substance metabolic process;GO:0006796…
	miR9566-y	Unigene0065559	-	85	4.5	4	0.004	1	1	--	-	-	-	-
	miR9566-y	Unigene0067433	-	79	4.5	4	0.004	1	1	--	-	-	-	-
	miR9566-y	Unigene0005557	-	298	4.5	4	0.004	1	1	Centrosomal protein [Anthurium amnicola]	-	-	-	-
	miR9566-y	Unigene0036729	RABB1C	870	4	4	0.004	1	1	PREDICTED: ras-related protein RABB1c isoform X1 [Amborella trichopoda]	-	GO:0043231//intracellular membrane-bounded organelle;GO:0044464//cell part;GO:0043227//membrane-bounded organelle;GO:0005622//intracellular;GO:0044424//intracellular part;GO:0005623//cell;GO:0043226//organelle;GO:0043229//intracellular organelle;GO:0016020//membrane	GO:0032549//ribonucleoside binding;GO:0001883//purine nucleoside binding;GO:0036094//small molecule binding;GO:0001882//nucleoside binding;GO:0032550//purine ribonucleoside binding;GO:0097159//organic cyclic compound binding;GO:1901363//heterocyclic compound binding;GO:0097367//carbohydrate derivative binding;GO:0005488//binding	GO:0048856//anatomical structure development;GO:0045184//establishment of protein localization;GO:0008104//protein localization;GO:0016192//vesicle-mediated transport;GO:0061024//membrane organization;GO:0034613//cellular protein localization;GO:0033036//macromolecule localization;GO:0051234//establishment of localization;GO:1902582//single-organism intracellular transport;GO:0006886//intracellul…
	miR9566-y	Unigene0053515	-	114	4	2	0.002	3	1.5	--	-	-	-	-
	miR9566-y	Unigene0067062	FH3	215	3.5	4	0.004	1	1	PREDICTED: formin-like protein 14 isoform X1 [Nelumbo nucifera]	-	GO:0005737//cytoplasm;GO:0015630//microtubule cytoskeleton;GO:0043226//organelle;GO:0044424//intracellular part;GO:0015629//actin cytoskeleton;GO:0043232//intracellular non-membrane-bounded organelle;GO:0044444//cytoplasmic part;GO:0005856//cytoskeleton;GO:0043228//non-membrane-bounded organelle;GO:0005623//cell;GO:0043229//intracellular organelle;GO:0044464//cell part;GO:0005622//intracellular	GO:0016787//hydrolase activity;GO:0008092//cytoskeletal protein binding;GO:0003779//actin binding;GO:0016791//phosphatase activity;GO:0003824//catalytic activity;GO:0005515//protein binding;GO:0016788//hydrolase activity, acting on ester bonds;GO:0042578//phosphoric ester hydrolase activity;GO:0005488//binding;GO:0015631//tubulin binding	GO:0044699//single-organism process;GO:0009555//pollen development;GO:0006793//phosphorus metabolic process;GO:0048229//gametophyte development;GO:0009987//cellular process;GO:0007010//cytoskeleton organization;GO:0071822//protein complex subunit organization;GO:0016043//cellular component organization;GO:0032501//multicellular organismal process;GO:0071840//cellular component organization or bio…
	miR9566-y	Unigene0003917	-	1428	4.5	4	0.004	1	0.5	--	-	-	-	-
	miR9566-y	Unigene0070815	PERK10	632	4.5	2	0.002	8	8	PREDICTED: proline-rich receptor-like protein kinase PERK8 [Nelumbo nucifera]	-	GO:0016020//membrane	GO:0004672//protein kinase activity;GO:0032550//purine ribonucleoside binding;GO:0003824//catalytic activity;GO:0016772//transferase activity, transferring phosphorus-containing groups;GO:0036094//small molecule binding;GO:0005488//binding;GO:0016301//kinase activity;GO:1901363//heterocyclic compound binding;GO:0097159//organic cyclic compound binding;GO:0001883//purine nucleoside binding;GO:0016…	GO:0036211//protein modification process;GO:0006464//cellular protein modification process;GO:0019538//protein metabolic process;GO:0009987//cellular process;GO:0044260//cellular macromolecule metabolic process;GO:0006793//phosphorus metabolic process;GO:0044267//cellular protein metabolic process;GO:0044237//cellular metabolic process;GO:0043170//macromolecule metabolic process;GO:0006796//phosp…
	miR9566-y	Unigene0084212	SBT2.5	625	4.5	2	0.002	3	3	PREDICTED: subtilisin-like protease SBT2.5 isoform X2 [Vitis vinifera]	-	GO:0005623//cell;GO:0030312//external encapsulating structure;GO:0044464//cell part;GO:0071944//cell periphery	GO:0003824//catalytic activity;GO:0016787//hydrolase activity;GO:0070011//peptidase activity, acting on L-amino acid peptides;GO:0008233//peptidase activity	GO:0043170//macromolecule metabolic process;GO:0008152//metabolic process;GO:0019538//protein metabolic process;GO:0044238//primary metabolic process;GO:0071704//organic substance metabolic process
	miR9566-y	Unigene0048606	TRABD	502	4	4	0.004	1	1	PREDICTED: traB domain-containing protein-like [Nelumbo nucifera]	-	-	-	-
	miR9566-y	Unigene0072157	BGLU47	99	4.5	2	0.002	14	14	PREDICTED: beta-glucosidase 46-like [Citrus sinensis]	ko01100//Metabolic pathways//Global and Overview//Metabolism;ko01110//Biosynthesis of secondary metabolites//Global and Overview//Metabolism;ko00500//Starch and sucrose metabolism//Carbohydrate metabolism//Metabolism;ko00940//Phenylpropanoid biosynthesis//Biosynthesis of other secondary metabolites//Metabolism;ko00460//Cyanoamino acid metabolism//Metabolism of other amino acids//Metabolism	-	-	GO:0008152//metabolic process;GO:0044238//primary metabolic process
	miR9566-y	Unigene0035902	SUVH5	2110	3	4	0.004	1	0.5	PREDICTED: LOW QUALITY PROTEIN: histone-lysine N-methyltransferase, H3 lysine-9 specific SUVH5-like [Nelumbo nucifera]	ko00310//Lysine degradation//Amino acid metabolism//Metabolism	-	GO:0003824//catalytic activity;GO:0016741//transferase activity, transferring one-carbon groups;GO:0005488//binding;GO:0016740//transferase activity;GO:0008168//methyltransferase activity	GO:0036211//protein modification process;GO:0043414//macromolecule methylation;GO:0016571//histone methylation;GO:0016569//covalent chromatin modification;GO:0016043//cellular component organization;GO:0019538//protein metabolic process;GO:0044237//cellular metabolic process;GO:0008152//metabolic process;GO:0043412//macromolecule modification;GO:0044260//cellular macromolecule metabolic process;G…
	miR9566-y	Unigene0030325	bcsl1b	1879	3.5	4	0.004	1	1	PREDICTED: AAA-ATPase At5g57480 [Nelumbo nucifera]	-	-	GO:0032550//purine ribonucleoside binding;GO:0001882//nucleoside binding;GO:0036094//small molecule binding;GO:0005488//binding;GO:0003824//catalytic activity;GO:0097159//organic cyclic compound binding;GO:0032549//ribonucleoside binding;GO:0097367//carbohydrate derivative binding;GO:1901363//heterocyclic compound binding;GO:0001883//purine nucleoside binding	GO:0043933//macromolecular complex subunit organization;GO:0017062//respiratory chain complex III assembly;GO:0071822//protein complex subunit organization;GO:0044085//cellular component biogenesis;GO:0071840//cellular component organization or biogenesis;GO:0043623//cellular protein complex assembly;GO:0022607//cellular component assembly;GO:0017004//cytochrome complex assembly;GO:0034622//cellu…
	miR9566-y	Unigene0061635	AGPP	645	4.5	2	0.002	6	6	PREDICTED: glucose-1-phosphate adenylyltransferase small subunit, chloroplastic/amyloplastic [Phoenix dactylifera]	ko01100//Metabolic pathways//Global and Overview//Metabolism;ko01110//Biosynthesis of secondary metabolites//Global and Overview//Metabolism;ko00500//Starch and sucrose metabolism//Carbohydrate metabolism//Metabolism;ko00520//Amino sugar and nucleotide sugar metabolism//Carbohydrate metabolism//Metabolism	-	-	-
	miR9566-y	Unigene0087888	DIT1	1021	4.5	2	0.002	2	2	PREDICTED: dicarboxylate transporter 1, chloroplastic [Phoenix dactylifera]	-	GO:0043231//intracellular membrane-bounded organelle;GO:0044422//organelle part;GO:0031975//envelope;GO:0009526//plastid envelope;GO:0044464//cell part;GO:0044444//cytoplasmic part;GO:0031976//plastid thylakoid;GO:0043229//intracellular organelle;GO:0009528//plastid inner membrane;GO:0031090//organelle membrane;GO:0044435//plastid part;GO:0009579//thylakoid;GO:0016020//membrane;GO:0031224//intrin…	GO:0022892//substrate-specific transporter activity;GO:0008514//organic anion transmembrane transporter activity;GO:0005310//dicarboxylic acid transmembrane transporter activity;GO:0046943//carboxylic acid transmembrane transporter activity;GO:0015075//ion transmembrane transporter activity;GO:0005215//transporter activity;GO:0022891//substrate-specific transmembrane transporter activity;GO:00053…	GO:1901605//alpha-amino acid metabolic process;GO:0006970//response to osmotic stress;GO:1901576//organic substance biosynthetic process;GO:0006082//organic acid metabolic process;GO:0015740//C4-dicarboxylate transport;GO:0071702//organic substance transport;GO:0006807//nitrogen compound metabolic process;GO:0044710//single-organism metabolic process;GO:0071554//cell wall organization or biogenes…
	miR9566-y	Unigene0063375	DDB_G0276689	1147	4.5	4	0.004	1	1	Zinc finger FYVE domain-containing protein 26 [Anthurium amnicola]	-	-	-	-
	miR9566-y	Unigene0068087	-	804	4.5	2	0.002	2	2	--	-	-	-	-
	miR9566-y	Unigene0104160	-	428	4.5	4	0.004	1	1	--	-	-	-	-
	miR9566-y	Unigene0055770	-	1146	3.5	2	0.002	2	2	--	-	-	-	-
	miR9566-y	Unigene0063122	Os02g0793000	883	4.5	4	0.004	1	1	PREDICTED: zinc finger CCCH domain-containing protein 18 [Elaeis guineensis]	-	-	-	-
	miR9566-y	Unigene0071709	WIT1	1722	4.5	4	0.004	1	1	PREDICTED: WPP domain-interacting tail-anchored protein 1-like isoform X2 [Nelumbo nucifera]	-	-	-	-
	miR9566-y	Unigene0050955	At4g27520	105	4.5	4	0.004	1	1	plastocyanin-like domain protein [Medicago truncatula]	-	-	-	-
	miR9566-y	Unigene0113175	BRG1	848	4.5	4	0.004	1	1	PREDICTED: BOI-related E3 ubiquitin-protein ligase 1 [Nelumbo nucifera]	-	-	-	-
	miR9566-y	Unigene0038177	CS	241	4.5	2	0.002	4	4	PREDICTED: citrate synthase, mitochondrial [Jatropha curcas]	ko01100//Metabolic pathways//Global and Overview//Metabolism;ko01110//Biosynthesis of secondary metabolites//Global and Overview//Metabolism;ko01130//Biosynthesis of antibiotics//Global and Overview//Metabolism;ko01120//Microbial metabolism in diverse environments//Global and Overview//Metabolism;ko01200//Carbon metabolism//Global and Overview//Metabolism;ko01230//Biosynthesis of amino acids//Glo…	-	GO:0003824//catalytic activity;GO:0016746//transferase activity, transferring acyl groups;GO:0016740//transferase activity	GO:0009987//cellular process;GO:0044699//single-organism process;GO:0019752//carboxylic acid metabolic process;GO:0006082//organic acid metabolic process;GO:0072350//tricarboxylic acid metabolic process;GO:0044763//single-organism cellular process;GO:0044237//cellular metabolic process;GO:0008152//metabolic process;GO:0006101//citrate metabolic process;GO:0044281//small molecule metabolic process…
	miR9566-y	Unigene0042142	-	459	4	3	0.012	2	2	PREDICTED: mediator of RNA polymerase II transcription subunit 15-like [Daucus carota subsp. sativus] [Daucus carota]	-	-	-	-
	miR9566-y	Unigene0000265	TIC62	776	4	2	0.002	2	2	PREDICTED: protein TIC 62, chloroplastic isoform X2 [Vitis vinifera]	-	-	-	-
	miR9566-y	Unigene0011283	CER1	1056	4	2	0.002	8	8	protein ECERIFERUM 1 isoform X2 [Asparagus officinalis]	ko01110//Biosynthesis of secondary metabolites//Global and Overview//Metabolism;ko00073//Cutin, suberine and wax biosynthesis//Lipid metabolism//Metabolism	GO:0016020//membrane	-	GO:0044699//single-organism process;GO:0008152//metabolic process;GO:0044710//single-organism metabolic process
	miR9566-y	Unigene0000160	PP2C	1908	4.5	4	0.004	1	1	PREDICTED: probable protein phosphatase 2C 27 [Nelumbo nucifera]	-	GO:0043229//intracellular organelle;GO:0044464//cell part;GO:0043227//membrane-bounded organelle;GO:0043231//intracellular membrane-bounded organelle;GO:0005622//intracellular;GO:0043226//organelle;GO:0005623//cell;GO:0044424//intracellular part	GO:0016787//hydrolase activity;GO:0003824//catalytic activity;GO:0016788//hydrolase activity, acting on ester bonds;GO:0004721//phosphoprotein phosphatase activity;GO:0005488//binding;GO:0016791//phosphatase activity;GO:0042578//phosphoric ester hydrolase activity;GO:0043167//ion binding;GO:0043169//cation binding	GO:0050794//regulation of cellular process;GO:0036211//protein modification process;GO:0009628//response to abiotic stimulus;GO:0006970//response to osmotic stress;GO:0050789//regulation of biological process;GO:0010033//response to organic substance;GO:0010468//regulation of gene expression;GO:0006357//regulation of transcription from RNA polymerase II promoter;GO:0043618//regulation of transcri…
	miR9566-y	Unigene0108308	LSM2	545	4	2	0.002	2	2	U6 snRNA-associated Sm-like protein LSm2, partial [Anthurium amnicola]	ko03040//Spliceosome//Transcription//Genetic Information Processing;ko03018//RNA degradation//Folding, sorting and degradation//Genetic Information Processing	-	-	-
	miR9566-y	Unigene0022520	FAM210B	261	4.5	2	0.002	6	6	Protein FAM210B, partial [Anthurium amnicola]	-	GO:0043227//membrane-bounded organelle;GO:0005737//cytoplasm;GO:0009507//chloroplast;GO:0043231//intracellular membrane-bounded organelle;GO:0044424//intracellular part;GO:0043229//intracellular organelle;GO:0044464//cell part;GO:0044444//cytoplasmic part;GO:0009536//plastid;GO:0043226//organelle;GO:0005623//cell;GO:0005622//intracellular	-	GO:0044767//single-organism developmental process;GO:0009987//cellular process;GO:0032502//developmental process;GO:0044699//single-organism process
	miR9566-y	Unigene0011666	-	3561	3.5	2	0.002	2	2	Chromodomain-helicase-DNA-binding protein Mi-2, partial [Anthurium amnicola]	-	-	-	-
	miR9566-y	Unigene0032657	APA1	608	4.5	3	0.012	3	3	PREDICTED: aspartic proteinase [Ricinus communis]	-	-	GO:0016787//hydrolase activity;GO:0003824//catalytic activity	GO:0043170//macromolecule metabolic process;GO:0071704//organic substance metabolic process;GO:0044238//primary metabolic process;GO:0008152//metabolic process;GO:0019538//protein metabolic process
	miR9566-y	Unigene0110138	Kmt2b	946	4.5	2	0.002	5	5	PREDICTED: uncharacterized protein LOC100249974 isoform X3 [Vitis vinifera]	-	-	-	-
	miR9566-y	Unigene0007712	Ttc1	2614	4	2	0.002	2	2	receptor kinase [Populus tomentosa]	-	-	-	-
	miR9566-y	Unigene0011478	PP2AB2	1481	4.5	2	0.002	2	2	PREDICTED: serine/threonine protein phosphatase 2A 55 kDa regulatory subunit B beta isoform-like isoform X1 [Gossypium raimondii]	ko03015//mRNA surveillance pathway//Translation//Genetic Information Processing	-	-	-
	miR9566-y	Unigene0009530	-	1819	4.5	4	0.004	1	1	UHRF1-binding protein 1-like [Anthurium amnicola]	-	-	-	-
	miR9566-y	Unigene0062726	ETO1	2670	4	4	0.004	1	1	PREDICTED: ethylene-overproduction protein 1 [Nelumbo nucifera]	-	-	GO:0005515//protein binding;GO:0005488//binding	GO:0003006//developmental process involved in reproduction;GO:0044260//cellular macromolecule metabolic process;GO:0043170//macromolecule metabolic process;GO:0030163//protein catabolic process;GO:0099402//plant organ development;GO:0042594//response to starvation;GO:0000003//reproduction;GO:0009057//macromolecule catabolic process;GO:0043632//modification-dependent macromolecule catabolic proces…
	miR9566-y	Unigene0053038	RECA	977	4.5	4	0.004	1	1	PREDICTED: DNA repair protein recA homolog 1, chloroplastic isoform X1 [Phoenix dactylifera]	ko03440//Homologous recombination//Replication and repair//Genetic Information Processing	GO:0009536//plastid;GO:0005737//cytoplasm;GO:0044446//intracellular organelle part;GO:0043226//organelle;GO:0005623//cell;GO:0044444//cytoplasmic part;GO:0005622//intracellular;GO:0009532//plastid stroma;GO:0043231//intracellular membrane-bounded organelle;GO:0044424//intracellular part;GO:0043229//intracellular organelle;GO:0043227//membrane-bounded organelle;GO:0044422//organelle part;GO:004446…	GO:0097367//carbohydrate derivative binding;GO:0016462//pyrophosphatase activity;GO:0005488//binding;GO:0001882//nucleoside binding;GO:0017111//nucleoside-triphosphatase activity;GO:0097159//organic cyclic compound binding;GO:0016818//hydrolase activity, acting on acid anhydrides, in phosphorus-containing anhydrides;GO:0003677//DNA binding;GO:0016787//hydrolase activity;GO:0001883//purine nucleos…	GO:0065008//regulation of biological quality;GO:0034641//cellular nitrogen compound metabolic process;GO:0050896//response to stimulus;GO:0006725//cellular aromatic compound metabolic process;GO:0022402//cell cycle process;GO:0009690//cytokinin metabolic process;GO:0051716//cellular response to stimulus;GO:0008152//metabolic process;GO:0046483//heterocycle metabolic process;GO:0090304//nucleic ac…
	miR9566-y	Unigene0111974	RPL6	658	4	2	0.002	5	5	PREDICTED: 60S ribosomal protein L6-2-like [Ziziphus jujuba]	ko03010//Ribosome//Translation//Genetic Information Processing	-	-	-
	miR9566-y	Unigene0071703	RIC2	600	4.5	2	0.002	3	3	ras-related protein RIC2 [Asparagus officinalis]	ko04144//Endocytosis//Transport and catabolism//Cellular Processes	-	GO:0097367//carbohydrate derivative binding;GO:0032549//ribonucleoside binding;GO:0001883//purine nucleoside binding;GO:0097159//organic cyclic compound binding;GO:0003824//catalytic activity;GO:0036094//small molecule binding;GO:1901363//heterocyclic compound binding;GO:0032550//purine ribonucleoside binding;GO:0001882//nucleoside binding;GO:0005488//binding	GO:0051179//localization;GO:0044700//single organism signaling;GO:0035556//intracellular signal transduction;GO:0033036//macromolecule localization;GO:0050794//regulation of cellular process;GO:0050896//response to stimulus;GO:0009987//cellular process;GO:0007165//signal transduction;GO:0050789//regulation of biological process;GO:0008104//protein localization;GO:0044699//single-organism process;…
	miR9566-y	Unigene0093560	-	597	4.5	3	0.012	2	2	Pollen Ole e 1 allergen/extensin [Cynara cardunculus var. scolymus] [Cynara cardunculus]	-	-	-	-
	miR9566-y	Unigene0044922	PP2C	678	4	4	0.004	1	1	PREDICTED: protein phosphatase 2C 16-like [Nelumbo nucifera]	ko04075//Plant hormone signal transduction//Signal transduction//Environmental Information Processing	-	-	-
	miR9566-y	Unigene0043365	cmbl	824	4.5	4	0.004	1	1	PREDICTED: endo-1,3;1,4-beta-D-glucanase isoform X2 [Ricinus communis]	-	-	GO:0016787//hydrolase activity;GO:0016788//hydrolase activity, acting on ester bonds;GO:0052689//carboxylic ester hydrolase activity;GO:0003824//catalytic activity	-
	miR9566-y	Unigene0072329	hsp90a.1	1168	4.5	4	0.004	1	1	PREDICTED: heat shock protein 90-6, mitochondrial-like [Nelumbo nucifera]	ko04141//Protein processing in endoplasmic reticulum//Folding, sorting and degradation//Genetic Information Processing;ko04626//Plant-pathogen interaction//Environmental adaptation//Organismal Systems	-	GO:0005488//binding;GO:0005515//protein binding	GO:0071704//organic substance metabolic process;GO:0044238//primary metabolic process;GO:0019538//protein metabolic process;GO:0050896//response to stimulus;GO:0008152//metabolic process;GO:0043170//macromolecule metabolic process;GO:0044267//cellular protein metabolic process;GO:0044260//cellular macromolecule metabolic process;GO:0009987//cellular process;GO:0044237//cellular metabolic process
	miR9566-y	Unigene0072476	PP2AB2	1099	4.5	2	0.002	3	3	PREDICTED: serine/threonine protein phosphatase 2A 55 kDa regulatory subunit B beta isoform-like isoform X1 [Gossypium arboreum]	ko03015//mRNA surveillance pathway//Translation//Genetic Information Processing	-	GO:0030234//enzyme regulator activity;GO:0019888//protein phosphatase regulator activity;GO:0098772//molecular function regulator;GO:0019208//phosphatase regulator activity	GO:0065007//biological regulation;GO:0019222//regulation of metabolic process;GO:0050789//regulation of biological process;GO:0050794//regulation of cellular process
	miR9566-y	Unigene0074327	ECM29	3507	4	4	0.004	1	1	PREDICTED: proteasome-associated protein ECM29 homolog [Vitis vinifera]	-	-	-	-
	miR9566-y	Unigene0055697	crop	432	4.5	4	0.004	1	1	PREDICTED: luc7-like protein isoform X1 [Musa acuminata subsp. malaccensis] [Musa acuminata]	-	-	-	-
	miR9566-y	Unigene0105222	BZIP17	679	4.5	4	0.004	1	1	PREDICTED: bZIP transcription factor 17 [Vitis vinifera]	-	-	-	-
	miR9566-y	Unigene0111497	SCL8	1456	4.5	4	0.004	1	1	PREDICTED: scarecrow-like protein 8 [Nelumbo nucifera]	-	-	-	-
	miR9566-y	Unigene0051963	-	376	4.5	4	0.004	1	0.5	PREDICTED: uncharacterized protein LOC100258835 isoform X1 [Vitis vinifera]	-	-	-	-
	miR9566-y	Unigene0051364	-	176	4	4	0.004	1	1	PREDICTED: Down syndrome critical region protein 3 homolog [Nelumbo nucifera]	-	GO:0012505//endomembrane system;GO:0005623//cell;GO:0044464//cell part	-	GO:0009648//photoperiodism;GO:0009416//response to light stimulus;GO:0009628//response to abiotic stimulus;GO:0009314//response to radiation;GO:0050896//response to stimulus
	miR9566-y	Unigene0002921	-	2264	4	2	0.002	4	4	PREDICTED: uncharacterized protein LOC104593065 [Nelumbo nucifera]	-	-	-	-
	miR9566-y	Unigene0072679	EDR2L	817	4	4	0.004	1	1	PREDICTED: protein ENHANCED DISEASE RESISTANCE 2-like isoform X1 [Nelumbo nucifera]	-	-	-	-
	miR9566-y	Unigene0065838	At4g31480	1829	3.5	4	0.004	1	1	PREDICTED: coatomer subunit beta-1 [Theobroma cacao]	-	GO:0005622//intracellular;GO:0000139//Golgi membrane;GO:0016023//cytoplasmic, membrane-bounded vesicle;GO:0031410//cytoplasmic vesicle;GO:0098805//whole membrane;GO:0048475//coated membrane;GO:0044464//cell part;GO:0030659//cytoplasmic vesicle membrane;GO:0030662//coated vesicle membrane;GO:0030120//vesicle coat;GO:0030135//coated vesicle;GO:0043234//protein complex;GO:0005737//cytoplasm;GO:00985…	-	GO:0033036//macromolecule localization;GO:0008104//protein localization;GO:0051179//localization;GO:0051234//establishment of localization;GO:0006810//transport;GO:0015031//protein transport;GO:0071702//organic substance transport;GO:0045184//establishment of protein localization
	miR9566-y	Unigene0063230	Zranb3	3291	3.5	4	0.004	1	1	SNF2_N domain-containing protein/Helicase_C domain-containing protein [Cephalotus follicularis]	-	-	-	-
	miR9566-y	Unigene0066969	-	3472	4.5	4	0.004	1	0.5	zf-CW domain-containing protein [Cephalotus follicularis]	-	-	-	-
	miR9566-y	Unigene0051964	-	376	4.5	4	0.004	1	0.5	PREDICTED: uncharacterized protein LOC105045577 isoform X3 [Elaeis guineensis]	-	-	-	-
	miR9566-y	Unigene0108100	SS3	2763	4	2	0.002	2	2	PREDICTED: starch synthase 3, chloroplastic/amyloplastic [Vitis vinifera]	-	-	-	GO:0008152//metabolic process
	miR9566-y	Unigene0063122	Os02g0793000	356	4.5	4	0.004	1	1	PREDICTED: zinc finger CCCH domain-containing protein 18 [Elaeis guineensis]	-	-	-	-
	miR9566-y	Unigene0045560	MDH1	1543	4.5	2	0.002	2	2	PREDICTED: malate dehydrogenase [NADP], chloroplastic-like [Nelumbo nucifera]	ko01100//Metabolic pathways//Global and Overview//Metabolism;ko01120//Microbial metabolism in diverse environments//Global and Overview//Metabolism;ko01200//Carbon metabolism//Global and Overview//Metabolism;ko00620//Pyruvate metabolism//Carbohydrate metabolism//Metabolism;ko00710//Carbon fixation in photosynthetic organisms//Energy metabolism//Metabolism	-	GO:0016615//malate dehydrogenase activity;GO:0016614//oxidoreductase activity, acting on CH-OH group of donors;GO:0003824//catalytic activity;GO:0016491//oxidoreductase activity	GO:0044238//primary metabolic process;GO:0006082//organic acid metabolic process;GO:0009987//cellular process;GO:0044763//single-organism cellular process;GO:0008152//metabolic process;GO:0043436//oxoacid metabolic process;GO:0044699//single-organism process;GO:0071704//organic substance metabolic process;GO:0044237//cellular metabolic process;GO:0044281//small molecule metabolic process;GO:00436…
	miR9566-y	Unigene0009074	Elac2	1515	4.5	4	0.004	1	1	PREDICTED: zinc phosphodiesterase ELAC protein 2-like isoform X1 [Nelumbo nucifera]	ko03013//RNA transport//Translation//Genetic Information Processing	-	-	GO:0006725//cellular aromatic compound metabolic process;GO:0090501//RNA phosphodiester bond hydrolysis;GO:0009987//cellular process;GO:0044238//primary metabolic process;GO:0046483//heterocycle metabolic process;GO:0090305//nucleic acid phosphodiester bond hydrolysis;GO:0034641//cellular nitrogen compound metabolic process;GO:0071704//organic substance metabolic process;GO:0090304//nucleic acid …
	miR9566-y	Unigene0055220	-	228	3.5	4	0.004	1	1	--	-	-	-	-
	miR9566-y	Unigene0031002	XCT	142	3	2	0.002	3	3	PREDICTED: protein XAP5 CIRCADIAN TIMEKEEPER isoform X2 [Nelumbo nucifera]	-	-	-	GO:0032502//developmental process;GO:0065008//regulation of biological quality;GO:0050793//regulation of developmental process;GO:0050794//regulation of cellular process;GO:0065007//biological regulation;GO:0044763//single-organism cellular process;GO:0050896//response to stimulus;GO:0009743//response to carbohydrate;GO:0010033//response to organic substance;GO:0009639//response to red or far red…
	miR9566-y	Unigene0066970	-	1265	4.5	4	0.004	1	0.5	PREDICTED: uncharacterized protein LOC102611579 [Citrus sinensis]	-	-	-	-
	miR9566-y	Unigene0067864	Dhx36	3115	4	2	0.002	2	2	PREDICTED: DExH-box ATP-dependent RNA helicase DExH3 [Elaeis guineensis]	ko03018//RNA degradation//Folding, sorting and degradation//Genetic Information Processing	-	GO:0017111//nucleoside-triphosphatase activity;GO:0036094//small molecule binding;GO:0042623//ATPase activity, coupled;GO:0016462//pyrophosphatase activity;GO:0001882//nucleoside binding;GO:0016787//hydrolase activity;GO:1901363//heterocyclic compound binding;GO:0005488//binding;GO:0016887//ATPase activity;GO:0016817//hydrolase activity, acting on acid anhydrides;GO:0016818//hydrolase activity, a…	-
	miR9566-y	Unigene0035903	SUVH5	2252	3	4	0.004	1	0.5	PREDICTED: LOW QUALITY PROTEIN: histone-lysine N-methyltransferase, H3 lysine-9 specific SUVH5-like [Nelumbo nucifera]	ko00310//Lysine degradation//Amino acid metabolism//Metabolism	-	GO:0008168//methyltransferase activity;GO:0005488//binding;GO:0003824//catalytic activity;GO:0016740//transferase activity;GO:0016741//transferase activity, transferring one-carbon groups	GO:0006996//organelle organization;GO:0032259//methylation;GO:0044260//cellular macromolecule metabolic process;GO:0051276//chromosome organization;GO:0008213//protein alkylation;GO:1902589//single-organism organelle organization;GO:0016569//covalent chromatin modification;GO:0019538//protein metabolic process;GO:0036211//protein modification process;GO:0006464//cellular protein modification proc…
	miR9566-y	Unigene0088698	-	347	4	2	0.002	2	2	PREDICTED: 54S ribosomal protein L37, mitochondrial [Sesamum indicum]	-	-	-	-
	miR9566-y	Unigene0066864	KINESIN-13A	2068	4	2	0.002	4	4	PREDICTED: kinesin-like protein KIN-13A [Nelumbo nucifera]	-	GO:0043227//membrane-bounded organelle;GO:0044446//intracellular organelle part;GO:0043231//intracellular membrane-bounded organelle;GO:0005622//intracellular;GO:0044422//organelle part;GO:0005794//Golgi apparatus;GO:0043229//intracellular organelle;GO:0015630//microtubule cytoskeleton;GO:0005737//cytoplasm;GO:0044464//cell part;GO:0012505//endomembrane system;GO:0043226//organelle;GO:0043232//in…	GO:0032550//purine ribonucleoside binding;GO:0005488//binding;GO:0001882//nucleoside binding;GO:0005515//protein binding;GO:0016787//hydrolase activity;GO:0016818//hydrolase activity, acting on acid anhydrides, in phosphorus-containing anhydrides;GO:0015631//tubulin binding;GO:0016817//hydrolase activity, acting on acid anhydrides;GO:0008092//cytoskeletal protein binding;GO:0001883//purine nucleo…	GO:0044699//single-organism process;GO:0044767//single-organism developmental process;GO:0043933//macromolecular complex subunit organization;GO:0007010//cytoskeleton organization;GO:0000003//reproduction;GO:0009888//tissue development;GO:0045229//external encapsulating structure organization;GO:0071822//protein complex subunit organization;GO:0044237//cellular metabolic process;GO:0007275//multi…
	miR9566-y	Unigene0058402	dyrk2	1536	3.5	2	0.002	2	2	Kinase domain-containing protein isoform 1 [Theobroma cacao]	-	-	GO:0003824//catalytic activity;GO:0016772//transferase activity, transferring phosphorus-containing groups;GO:0016301//kinase activity;GO:0016740//transferase activity	GO:0006796//phosphate-containing compound metabolic process;GO:0008152//metabolic process;GO:0006793//phosphorus metabolic process;GO:0044237//cellular metabolic process;GO:0009987//cellular process
	miR9566-y	Unigene0062346	CPN60A1	846	4.5	3	0.012	6	6	PREDICTED: ruBisCO large subunit-binding protein subunit alpha [Vitis vinifera]	-	GO:0005622//intracellular;GO:0044424//intracellular part;GO:0005623//cell;GO:0044464//cell part	GO:0001883//purine nucleoside binding;GO:0032550//purine ribonucleoside binding;GO:1901363//heterocyclic compound binding;GO:0005488//binding;GO:0097367//carbohydrate derivative binding;GO:0032549//ribonucleoside binding;GO:0097159//organic cyclic compound binding;GO:0001882//nucleoside binding;GO:0036094//small molecule binding	GO:0006457//protein folding;GO:0009987//cellular process
	miR9566-y	Unigene0082348	-	719	3.5	2	0.002	2	2	E3 ubiquitin-protein ligase UPL6 [Morus notabilis]	-	-	-	-
	miR9566-y	Unigene0058265	Os02g0611500	2057	4.5	2	0.002	2	2	PREDICTED: eukaryotic translation initiation factor [Vitis vinifera]	ko03013//RNA transport//Translation//Genetic Information Processing	-	-	-
	miR9566-y	Unigene0056566	-	390	4.5	0	0.006	29	29	PREDICTED: uncharacterized protein LOC104600482 isoform X1 [Nelumbo nucifera]	-	-	-	-
	miR9566-y	Unigene0053514	GK-2	1999	4	2	0.002	3	1.5	PREDICTED: guanylate kinase 2-like [Nelumbo nucifera]	ko01100//Metabolic pathways//Global and Overview//Metabolism;ko00230//Purine metabolism//Nucleotide metabolism//Metabolism	-	GO:0016740//transferase activity;GO:0003824//catalytic activity;GO:0016772//transferase activity, transferring phosphorus-containing groups	GO:0008152//metabolic process;GO:0006796//phosphate-containing compound metabolic process;GO:0019637//organophosphate metabolic process;GO:0006793//phosphorus metabolic process;GO:0044699//single-organism process;GO:0044710//single-organism metabolic process;GO:0009117//nucleotide metabolic process;GO:0006725//cellular aromatic compound metabolic process;GO:0006807//nitrogen compound metabolic pr…
	miR9566-y	Unigene0060073	tif211	794	4.5	4	0.004	1	1	Eukaryotic translation initiation factor 2 subunit alpha [Anthurium amnicola]	ko04141//Protein processing in endoplasmic reticulum//Folding, sorting and degradation//Genetic Information Processing;ko03013//RNA transport//Translation//Genetic Information Processing	GO:0043234//protein complex;GO:0032991//macromolecular complex	GO:0003676//nucleic acid binding;GO:0003723//RNA binding;GO:1901363//heterocyclic compound binding;GO:0008135//translation factor activity, RNA binding;GO:0005488//binding;GO:0097159//organic cyclic compound binding	GO:1901564//organonitrogen compound metabolic process;GO:0019538//protein metabolic process;GO:0044249//cellular biosynthetic process;GO:0044260//cellular macromolecule metabolic process;GO:0043043//peptide biosynthetic process;GO:0071704//organic substance metabolic process;GO:0044271//cellular nitrogen compound biosynthetic process;GO:0009058//biosynthetic process;GO:0044238//primary metabolic …
	miR9566-y	Unigene0053757	MYB108	780	4.5	4	0.004	1	1	PREDICTED: transcription factor MYB108-like [Nelumbo nucifera]	-	-	-	-
	miR9566-y	Unigene0109534	E6	389	4.5	4	0.004	1	1	PREDICTED: protein E6 [Elaeis guineensis]	-	-	-	-
	miR9566-y	Unigene0092599	CS2	1409	4.5	4	0.004	1	1	PREDICTED: chorismate synthase 2, chloroplastic [Amborella trichopoda]	ko01100//Metabolic pathways//Global and Overview//Metabolism;ko01110//Biosynthesis of secondary metabolites//Global and Overview//Metabolism;ko01130//Biosynthesis of antibiotics//Global and Overview//Metabolism;ko01230//Biosynthesis of amino acids//Global and Overview//Metabolism;ko00400//Phenylalanine, tyrosine and tryptophan biosynthesis//Amino acid metabolism//Metabolism	-	GO:0003824//catalytic activity	GO:0044281//small molecule metabolic process;GO:0046394//carboxylic acid biosynthetic process;GO:0008152//metabolic process;GO:0044711//single-organism biosynthetic process;GO:0019752//carboxylic acid metabolic process;GO:0044763//single-organism cellular process;GO:0071704//organic substance metabolic process;GO:0044237//cellular metabolic process;GO:0006807//nitrogen compound metabolic process;…
	miR9566-y	Unigene0075959	-	73	4.5	4	0.004	1	0.5	--	-	-	-	-
	miR9566-y	Unigene0053256	DOT2	2140	4.5	2	0.002	5	5	PREDICTED: SART-1 family protein DOT2 [Vitis vinifera]	ko03040//Spliceosome//Transcription//Genetic Information Processing	-	-	-
novel-m0010-5p,novel-m0011-5p	novel-m0010-5p,novel-m0011-5p	Unigene0049507	SPL15	2195	3	2	0.014	2	2	PREDICTED: squamosa promoter-binding-like protein 14 [Nelumbo nucifera]	-	-	-	-
	novel-m0010-5p,novel-m0011-5p	Unigene0037582	-	694	4.5	2	0.014	7	7	PREDICTED: neurofilament light polypeptide-like [Gossypium hirsutum]	-	-	-	-
	novel-m0010-5p,novel-m0011-5p	Unigene0113229	-	378	4	2	0.014	5	5	hypothetical protein MANES_08G106000 [Manihot esculenta]	-	-	-	-
	novel-m0010-5p,novel-m0011-5p	Unigene0054450	Os05g0200100	553	4.5	2	0.014	2	2	PREDICTED: thioredoxin-like 2, chloroplastic [Malus domestica]	-	-	-	GO:0044699//single-organism process
	novel-m0010-5p,novel-m0011-5p	Unigene0086076	TOC75-3	492	3	2	0.014	14	14	PREDICTED: protein TOC75-3, chloroplastic-like [Phoenix dactylifera]	-	GO:0009527//plastid outer membrane;GO:0009526//plastid envelope;GO:0031090//organelle membrane;GO:0044446//intracellular organelle part;GO:0098588//bounding membrane of organelle;GO:0009536//plastid;GO:0044464//cell part;GO:0019867//outer membrane;GO:0031301//integral component of organelle membrane;GO:0031967//organelle envelope;GO:0031355//integral component of plastid outer membrane;GO:0016020…	GO:0022857//transmembrane transporter activity;GO:0005215//transporter activity;GO:0022884//macromolecule transmembrane transporter activity;GO:0022892//substrate-specific transporter activity;GO:0008320//protein transmembrane transporter activity;GO:0008565//protein transporter activity;GO:0022891//substrate-specific transmembrane transporter activity	GO:0006996//organelle organization;GO:0009987//cellular process;GO:0032502//developmental process;GO:0044763//single-organism cellular process;GO:1902578//single-organism localization;GO:0033036//macromolecule localization;GO:0008104//protein localization;GO:0070727//cellular macromolecule localization;GO:0045184//establishment of protein localization;GO:0051641//cellular localization;GO:0006810/…
	novel-m0010-5p,novel-m0011-5p	Unigene0026840	KRI1	643	4.5	2	0.014	2	2	PREDICTED: protein KRI1 homolog [Nelumbo nucifera]	-	-	-	-
	novel-m0010-5p,novel-m0011-5p	Unigene0054907	-	504	3	2	0.014	2	2	PREDICTED: protein ANTI-SILENCING 1-like [Nelumbo nucifera]	-	-	-	-
	novel-m0010-5p,novel-m0011-5p	Unigene0029967	LEA14-A	1101	4	2	0.014	8	2.66667	late embryogenesis abundant protein [Tamarix hispida]	-	GO:0043231//intracellular membrane-bounded organelle;GO:0044444//cytoplasmic part;GO:0005623//cell;GO:0005622//intracellular;GO:0030054//cell junction;GO:0043226//organelle;GO:0005911//cell-cell junction;GO:0005737//cytoplasm;GO:0016020//membrane;GO:0044424//intracellular part;GO:0043227//membrane-bounded organelle;GO:0043229//intracellular organelle;GO:0044464//cell part	-	GO:0051234//establishment of localization;GO:1901576//organic substance biosynthetic process;GO:0006807//nitrogen compound metabolic process;GO:0001101//response to acid chemical;GO:0005975//carbohydrate metabolic process;GO:0006810//transport;GO:0019752//carboxylic acid metabolic process;GO:0006970//response to osmotic stress;GO:0009058//biosynthetic process;GO:0044237//cellular metabolic proces…
	novel-m0010-5p,novel-m0011-5p	Unigene0113950	YLS9	589	4	2	0.014	3	3	PREDICTED: protein YLS9-like [Nelumbo nucifera]	-	-	-	-
	novel-m0010-5p,novel-m0011-5p	Unigene0045504	SCC3	655	4.5	2	0.014	9	9	PREDICTED: sister-chromatid cohesion protein 3 [Elaeis guineensis]	-	-	-	-
	novel-m0010-5p,novel-m0011-5p	Unigene0056864	PRP19	32	3	2	0.014	2	2	PREDICTED: pre-mRNA-processing factor 19 [Elaeis guineensis]	ko03040//Spliceosome//Transcription//Genetic Information Processing;ko04120//Ubiquitin mediated proteolysis//Folding, sorting and degradation//Genetic Information Processing	-	-	-
	novel-m0010-5p,novel-m0011-5p	Unigene0023115	-	385	2.5	2	0.014	2	2	--	-	-	-	-
	novel-m0010-5p,novel-m0011-5p	Unigene0029966	LEA14-A	1101	4	2	0.014	8	2.66667	late embryogenesis abundant protein [Tamarix hispida]	-	GO:0030054//cell junction;GO:0005622//intracellular;GO:0016020//membrane;GO:0005911//cell-cell junction;GO:0005623//cell;GO:0043226//organelle;GO:0044444//cytoplasmic part;GO:0043227//membrane-bounded organelle;GO:0044424//intracellular part;GO:0043229//intracellular organelle;GO:0044464//cell part;GO:0005737//cytoplasm;GO:0043231//intracellular membrane-bounded organelle	-	GO:0006807//nitrogen compound metabolic process;GO:0050896//response to stimulus;GO:0044249//cellular biosynthetic process;GO:0044283//small molecule biosynthetic process;GO:0044763//single-organism cellular process;GO:0044710//single-organism metabolic process;GO:0000097//sulfur amino acid biosynthetic process;GO:0044711//single-organism biosynthetic process;GO:0071704//organic substance metabol…
	novel-m0010-5p,novel-m0011-5p	Unigene0049954	At3g62120	1737	3.5	2	0.014	5	5	PREDICTED: proline--tRNA ligase, cytoplasmic-like [Capsicum annuum]	ko00970//Aminoacyl-tRNA biosynthesis//Translation//Genetic Information Processing	-	-	-
	novel-m0010-5p,novel-m0011-5p	Unigene0084401	-	112	4.5	2	0.014	13	6.5	--	-	-	-	-
	novel-m0010-5p,novel-m0011-5p	Unigene0053382	At4g18375	70	4.5	2	0.014	8	8	PREDICTED: KH domain-containing protein At4g18375 [Elaeis guineensis]	-	-	GO:0003676//nucleic acid binding;GO:1901363//heterocyclic compound binding;GO:0005488//binding;GO:0097159//organic cyclic compound binding	-
	novel-m0010-5p,novel-m0011-5p	Unigene0024390	-	417	3.5	1	0.012	3	3	--	-	-	-	-
	novel-m0010-5p,novel-m0011-5p	Unigene0084458	GDH2	592	4.5	2	0.014	4	2	Glutamate dehydrogenase 2 [Theobroma cacao]	ko01100//Metabolic pathways//Global and Overview//Metabolism;ko01200//Carbon metabolism//Global and Overview//Metabolism;ko00250//Alanine, aspartate and glutamate metabolism//Amino acid metabolism//Metabolism;ko00910//Nitrogen metabolism//Energy metabolism//Metabolism;ko00220//Arginine biosynthesis//Amino acid metabolism//Metabolism	GO:0016020//membrane;GO:0044422//organelle part;GO:0005623//cell;GO:0043226//organelle;GO:0043231//intracellular membrane-bounded organelle;GO:0005622//intracellular;GO:0044464//cell part;GO:0043227//membrane-bounded organelle;GO:0044424//intracellular part;GO:0043229//intracellular organelle;GO:0031090//organelle membrane	GO:0046914//transition metal ion binding;GO:0003824//catalytic activity;GO:0097367//carbohydrate derivative binding;GO:0046872//metal ion binding;GO:0001882//nucleoside binding;GO:0043167//ion binding;GO:0036094//small molecule binding;GO:0005488//binding;GO:0032550//purine ribonucleoside binding;GO:0016638//oxidoreductase activity, acting on the CH-NH2 group of donors;GO:0043169//cation binding;…	GO:0009987//cellular process;GO:0043436//oxoacid metabolic process;GO:0044106//cellular amine metabolic process;GO:0034641//cellular nitrogen compound metabolic process;GO:0051234//establishment of localization;GO:0009072//aromatic amino acid family metabolic process;GO:0019752//carboxylic acid metabolic process;GO:0009308//amine metabolic process;GO:0044238//primary metabolic process;GO:0006725/…
	novel-m0010-5p,novel-m0011-5p	Unigene0025247	RH56	1558	4.5	2	0.014	4	4	PREDICTED: DEAD-box ATP-dependent RNA helicase 56 [Nelumbo nucifera]	-	-	-	-
	novel-m0010-5p,novel-m0011-5p	Unigene0029968	LEA14-A	1101	4	2	0.014	8	2.66667	late embryogenesis abundant protein [Tamarix hispida]	-	GO:0044444//cytoplasmic part;GO:0030054//cell junction;GO:0043229//intracellular organelle;GO:0043226//organelle;GO:0005622//intracellular;GO:0044464//cell part;GO:0005737//cytoplasm;GO:0016020//membrane;GO:0044424//intracellular part;GO:0005911//cell-cell junction;GO:0043227//membrane-bounded organelle;GO:0005623//cell;GO:0043231//intracellular membrane-bounded organelle	-	GO:0010035//response to inorganic substance;GO:0043436//oxoacid metabolic process;GO:1901576//organic substance biosynthetic process;GO:0019318//hexose metabolic process;GO:0044272//sulfur compound biosynthetic process;GO:1901566//organonitrogen compound biosynthetic process;GO:0006520//cellular amino acid metabolic process;GO:0005996//monosaccharide metabolic process;GO:0009058//biosynthetic pro…
	novel-m0010-5p,novel-m0011-5p	Unigene0008504	-	445	4.5	2	0.014	2	2	Phosphoribosylformylglycinamidine synthase 2 [Anthurium amnicola]	-	-	-	-
	novel-m0010-5p,novel-m0011-5p	Unigene0076014	-	84	4	2	0.014	9	9	Retrovirus-related Pol polyprotein from transposon 17.6 [Cajanus cajan]	-	-	-	-
	novel-m0010-5p,novel-m0011-5p	Unigene0076986	ABCF4	334	3.5	2	0.014	2	2	PREDICTED: ABC transporter F family member 4 [Ipomoea nil]	-	-	-	-
	novel-m0010-5p,novel-m0011-5p	Unigene0080572	-	1066	4.5	2	0.014	2	2	--	-	-	-	-
	novel-m0010-5p,novel-m0011-5p	Unigene0030373	-	2417	4	2	0.014	2	1	PREDICTED: histone H3.v1-like isoform X2 [Nelumbo nucifera]	-	-	-	-
	novel-m0010-5p,novel-m0011-5p	Unigene0088290	ASIL2	242	4	2	0.014	3	3	PREDICTED: trihelix transcription factor ASIL1 [Amborella trichopoda]	-	-	-	-
	novel-m0010-5p,novel-m0011-5p	Unigene0089228	RPL22B	295	4.5	2	0.014	2	2	PREDICTED: 60S ribosomal protein L22-2 [Nelumbo nucifera]	ko03010//Ribosome//Translation//Genetic Information Processing	GO:0044464//cell part;GO:0005623//cell;GO:0030529//intracellular ribonucleoprotein complex;GO:1990904//ribonucleoprotein complex;GO:0032991//macromolecular complex;GO:0044424//intracellular part;GO:0005622//intracellular	-	GO:0071704//organic substance metabolic process;GO:0008152//metabolic process;GO:0010467//gene expression;GO:0043170//macromolecule metabolic process
	novel-m0010-5p,novel-m0011-5p	Unigene0030372	-	2520	4	2	0.014	2	1	PREDICTED: histone H3.v1-like isoform X2 [Nelumbo nucifera]	-	-	-	-
	novel-m0010-5p,novel-m0011-5p	Unigene0024578	-	37	4.5	2	0.014	4	4	PREDICTED: uncharacterized protein LOC104610075 isoform X2 [Nelumbo nucifera]	-	-	-	-
	novel-m0010-5p,novel-m0011-5p	Unigene0065363	-	183	4	2	0.014	3	1.5	--	-	-	-	-
	novel-m0010-5p,novel-m0011-5p	Unigene0099957	-	330	4.5	2	0.014	2	2	Lysine--tRNA ligase [Anthurium amnicola]	-	-	-	-
	novel-m0010-5p,novel-m0011-5p	Unigene0076030	-	175	4.5	2	0.014	15	15	--	-	-	-	-
	novel-m0010-5p,novel-m0011-5p	Unigene0006809	UTP14	1035	4	2	0.014	8	8	PREDICTED: U3 small nucleolar RNA-associated protein 14 homolog A [Vitis vinifera]	ko03008//Ribosome biogenesis in eukaryotes//Translation//Genetic Information Processing	-	-	-
	novel-m0010-5p,novel-m0011-5p	Unigene0023258	IP5P8	778	4.5	2	0.014	2	2	PREDICTED: type I inositol 1,4,5-trisphosphate 5-phosphatase CVP2 [Cicer arietinum]	ko01100//Metabolic pathways//Global and Overview//Metabolism;ko00562//Inositol phosphate metabolism//Carbohydrate metabolism//Metabolism;ko04070//Phosphatidylinositol signaling system//Signal transduction//Environmental Information Processing	-	-	-
	novel-m0010-5p,novel-m0011-5p	Unigene0070282	Gigyf2	5272	4	2	0.014	5	5	PREDICTED: uncharacterized protein LOC104588158 isoform X2 [Nelumbo nucifera]	-	-	-	-
	novel-m0010-5p,novel-m0011-5p	Unigene0084400	-	119	4.5	2	0.014	13	6.5	--	-	-	-	-
	novel-m0010-5p,novel-m0011-5p	Unigene0002842	GDH	592	4.5	2	0.014	4	2	Glutamate dehydrogenase 2, partial [Anthurium amnicola]	ko01100//Metabolic pathways//Global and Overview//Metabolism;ko01200//Carbon metabolism//Global and Overview//Metabolism;ko00250//Alanine, aspartate and glutamate metabolism//Amino acid metabolism//Metabolism;ko00910//Nitrogen metabolism//Energy metabolism//Metabolism;ko00220//Arginine biosynthesis//Amino acid metabolism//Metabolism	GO:0016020//membrane;GO:0043231//intracellular membrane-bounded organelle;GO:0031090//organelle membrane;GO:0043227//membrane-bounded organelle;GO:0005622//intracellular;GO:0005623//cell;GO:0044424//intracellular part;GO:0044464//cell part;GO:0044422//organelle part;GO:0043226//organelle;GO:0043229//intracellular organelle	GO:0043169//cation binding;GO:0043167//ion binding;GO:1901363//heterocyclic compound binding;GO:0016646//oxidoreductase activity, acting on the CH-NH group of donors, NAD or NADP as acceptor;GO:0001882//nucleoside binding;GO:0097367//carbohydrate derivative binding;GO:0032550//purine ribonucleoside binding;GO:0036094//small molecule binding;GO:0032549//ribonucleoside binding;GO:0016639//oxidoredu…	GO:0051179//localization;GO:0006520//cellular amino acid metabolic process;GO:0006575//cellular modified amino acid metabolic process;GO:0051234//establishment of localization;GO:0044710//single-organism metabolic process;GO:0005996//monosaccharide metabolic process;GO:0044699//single-organism process;GO:0005975//carbohydrate metabolic process;GO:0071840//cellular component organization or biogen…
	novel-m0010-5p,novel-m0011-5p	Unigene0083193	At5g26707	1262	4.5	2	0.014	3	3	PREDICTED: glutamate--tRNA ligase, cytoplasmic [Nelumbo nucifera]	ko01100//Metabolic pathways//Global and Overview//Metabolism;ko01110//Biosynthesis of secondary metabolites//Global and Overview//Metabolism;ko01120//Microbial metabolism in diverse environments//Global and Overview//Metabolism;ko00970//Aminoacyl-tRNA biosynthesis//Translation//Genetic Information Processing;ko00860//Porphyrin and chlorophyll metabolism//Metabolism of cofactors and vitamins//Meta…	GO:0044424//intracellular part;GO:0005623//cell;GO:0044464//cell part;GO:0005737//cytoplasm;GO:0005622//intracellular;GO:0044444//cytoplasmic part	GO:0097159//organic cyclic compound binding;GO:0036094//small molecule binding;GO:0016874//ligase activity;GO:0001882//nucleoside binding;GO:0032549//ribonucleoside binding;GO:0032550//purine ribonucleoside binding;GO:0016876//ligase activity, forming aminoacyl-tRNA and related compounds;GO:0005488//binding;GO:0003824//catalytic activity;GO:1901363//heterocyclic compound binding;GO:0001883//purin…	GO:0009059//macromolecule biosynthetic process;GO:0006996//organelle organization;GO:0043038//amino acid activation;GO:0043436//oxoacid metabolic process;GO:1901564//organonitrogen compound metabolic process;GO:1901576//organic substance biosynthetic process;GO:0006006//glucose metabolic process;GO:0006725//cellular aromatic compound metabolic process;GO:0030163//protein catabolic process;GO:0044…
	novel-m0010-5p,novel-m0011-5p	Unigene0075226	ccdc94	733	3	2	0.014	10	10	PREDICTED: coiled-coil domain-containing protein 94 homolog [Glycine max]	-	-	-	-
	novel-m0010-5p,novel-m0011-5p	Unigene0064419	RPS24B	386	4.5	2	0.014	15	15	PREDICTED: 40S ribosomal protein S24-1 [Ipomoea nil]	ko03010//Ribosome//Translation//Genetic Information Processing	GO:0005623//cell;GO:0044424//intracellular part;GO:1990904//ribonucleoprotein complex;GO:0030529//intracellular ribonucleoprotein complex;GO:0005622//intracellular;GO:0044464//cell part;GO:0032991//macromolecular complex	GO:0005198//structural molecule activity	GO:0008152//metabolic process;GO:0043170//macromolecule metabolic process;GO:0010467//gene expression;GO:0071704//organic substance metabolic process
	novel-m0010-5p,novel-m0011-5p	Unigene0082170	SPBP8B7.15c	1649	4.5	2	0.014	5	5	PREDICTED: protein MPE1-like isoform X4 [Nelumbo nucifera]	-	-	-	-
	novel-m0010-5p,novel-m0011-5p	Unigene0073266	CYP97A3	1171	4.5	2	0.014	7	7	PREDICTED: protein LUTEIN DEFICIENT 5, chloroplastic-like isoform X1 [Nelumbo nucifera]	ko01100//Metabolic pathways//Global and Overview//Metabolism;ko01110//Biosynthesis of secondary metabolites//Global and Overview//Metabolism;ko00906//Carotenoid biosynthesis//Metabolism of terpenoids and polyketides//Metabolism	GO:0043226//organelle;GO:0044464//cell part;GO:0044446//intracellular organelle part;GO:0009536//plastid;GO:0043229//intracellular organelle;GO:0031967//organelle envelope;GO:0031090//organelle membrane;GO:0005737//cytoplasm;GO:0044424//intracellular part;GO:0044422//organelle part;GO:0031975//envelope;GO:0005623//cell;GO:0044435//plastid part;GO:0043231//intracellular membrane-bounded organelle;…	GO:0016712//oxidoreductase activity, acting on paired donors, with incorporation or reduction of molecular oxygen, reduced flavin or flavoprotein as one donor, and incorporation of one atom of oxygen;GO:0097159//organic cyclic compound binding;GO:0046914//transition metal ion binding;GO:0004497//monooxygenase activity;GO:0016705//oxidoreductase activity, acting on paired donors, with incorporatio…	GO:0018130//heterocycle biosynthetic process;GO:0043170//macromolecule metabolic process;GO:0016114//terpenoid biosynthetic process;GO:0009893//positive regulation of metabolic process;GO:0006779//porphyrin-containing compound biosynthetic process;GO:0050789//regulation of biological process;GO:0044710//single-organism metabolic process;GO:0046148//pigment biosynthetic process;GO:0008299//isopren…
	novel-m0010-5p,novel-m0011-5p	Unigene0026292	-	102	3.5	2	0.014	2	2	PREDICTED: glucosidase 2 subunit beta [Phoenix dactylifera]	-	-	-	-
	novel-m0010-5p,novel-m0011-5p	Unigene0033109	PPA4	341	3.5	2	0.014	3	3	PREDICTED: soluble inorganic pyrophosphatase 4-like [Phoenix dactylifera]	ko00190//Oxidative phosphorylation//Energy metabolism//Metabolism	-	-	-
	novel-m0010-5p,novel-m0011-5p	Unigene0010855	APUM3	433	3.5	2	0.014	4	4	PREDICTED: pumilio homolog 2-like [Nelumbo nucifera]	-	-	-	-
	novel-m0010-5p,novel-m0011-5p	Unigene0101320	yuiD	31	3.5	2	0.014	2	2	Acid phosphatase/vanadium-dependent haloperoxidase-related protein [Theobroma cacao]	-	-	-	GO:0008152//metabolic process;GO:0044699//single-organism process;GO:0044710//single-organism metabolic process
	novel-m0010-5p,novel-m0011-5p	Unigene0011482	ELC	781	4	2	0.014	5	5	PREDICTED: protein ELC-like [Nelumbo nucifera]	ko04144//Endocytosis//Transport and catabolism//Cellular Processes	-	-	GO:0033036//macromolecule localization;GO:0051179//localization;GO:0008104//protein localization
	novel-m0010-5p,novel-m0011-5p	Unigene0063579	-	2254	4	2	0.014	2	2	hypothetical protein CISIN_1g0136582mg, partial [Citrus sinensis]	-	-	-	-
	novel-m0010-5p,novel-m0011-5p	Unigene0070852	Os07g0682400	765	4.5	2	0.014	3	3	PREDICTED: zinc finger CCCH domain-containing protein 53 isoform X1 [Vitis vinifera]	-	-	-	-
	novel-m0010-5p,novel-m0011-5p	Unigene0082031	-	70	4.5	2	0.014	2	2	Transmembrane protein DDB_G0273707/DDB_G0273361 [Anthurium amnicola]	-	-	-	-
	novel-m0010-5p,novel-m0011-5p	Unigene0059281	B3GALT19	2478	4	2	0.014	2	2	PREDICTED: hydroxyproline O-galactosyltransferase GALT6-like [Nelumbo nucifera]	-	GO:0016020//membrane;GO:0044425//membrane part;GO:0031224//intrinsic component of membrane	GO:0016757//transferase activity, transferring glycosyl groups;GO:0035250//UDP-galactosyltransferase activity;GO:0005488//binding;GO:0008194//UDP-glycosyltransferase activity;GO:0016758//transferase activity, transferring hexosyl groups;GO:0016740//transferase activity;GO:0008378//galactosyltransferase activity;GO:0003824//catalytic activity	GO:0044267//cellular protein metabolic process;GO:0008152//metabolic process;GO:0043170//macromolecule metabolic process;GO:0044237//cellular metabolic process;GO:0009987//cellular process;GO:0006464//cellular protein modification process;GO:0044260//cellular macromolecule metabolic process;GO:0044238//primary metabolic process;GO:0036211//protein modification process;GO:0019538//protein metaboli…
	novel-m0010-5p,novel-m0011-5p	Unigene0054395	-	189	4.5	2	0.014	69	69	PLATZ transcription factor family protein [Medicago truncatula]	-	-	-	-
	novel-m0010-5p,novel-m0011-5p	Unigene0026998	HIPP26	1196	4	2	0.014	59	59	PREDICTED: heavy metal-associated isoprenylated plant protein 3-like [Nelumbo nucifera]	-	-	-	-
	novel-m0010-5p,novel-m0011-5p	Unigene0038713	At5g01610	875	4.5	2	0.014	3	3	DUF538 domain-containing protein [Cephalotus follicularis]	-	-	-	-
	novel-m0010-5p,novel-m0011-5p	Unigene0047189	UGT82A1	255	3.5	2	0.014	2	2	PREDICTED: UDP-glycosyltransferase 82A1 [Prunus mume]	-	-	GO:0016740//transferase activity;GO:0003824//catalytic activity	-
	novel-m0010-5p,novel-m0011-5p	Unigene0015547	nfrkb	3045	4.5	2	0.014	4	4	PREDICTED: uncharacterized protein LOC104599217 [Nelumbo nucifera]	-	-	-	GO:0071840//cellular component organization or biogenesis;GO:0034641//cellular nitrogen compound metabolic process;GO:0051321//meiotic cell cycle;GO:0043170//macromolecule metabolic process;GO:0048285//organelle fission;GO:0044699//single-organism process;GO:0044702//single organism reproductive process;GO:0006996//organelle organization;GO:0090304//nucleic acid metabolic process;GO:0044260//cell…
	novel-m0010-5p,novel-m0011-5p	Unigene0009052	NUB1	804	4.5	2	0.014	2	2	PREDICTED: NEDD8 ultimate buster 1 [Nelumbo nucifera]	-	-	-	-
	novel-m0010-5p,novel-m0011-5p	Unigene0079468	CYP93A1	915	4	2	0.014	17	17	PREDICTED: cytochrome P450 93A3-like [Ziziphus jujuba]	-	-	GO:0005488//binding	-
	novel-m0010-5p,novel-m0011-5p	Unigene0054554	pof4	936	4.5	2	0.014	2	2	PREDICTED: transcription elongation factor B polypeptide 3 [Musa acuminata subsp. malaccensis] [Musa acuminata]	-	-	-	-
	novel-m0010-5p,novel-m0011-5p	Unigene0105260	IKU1	536	4	2	0.014	2	2	PREDICTED: protein HAIKU1-like [Juglans regia]	-	-	-	-
	novel-m0010-5p,novel-m0011-5p	Unigene0082178	-	834	3.5	2	0.014	2	2	--	-	-	-	-
	novel-m0010-5p,novel-m0011-5p	Unigene0065363	-	75	4	2	0.014	3	1.5	--	-	-	-	-
	novel-m0010-5p,novel-m0011-5p	Unigene0081133	FH6	110	4	2	0.014	2	2	PREDICTED: formin-like protein 17 [Phoenix dactylifera]	-	-	-	-
	novel-m0010-5p,novel-m0011-5p	Unigene0106264	rplT	619	4	2	0.014	2	2	PREDICTED: 50S ribosomal protein L20-like [Phoenix dactylifera]	ko03010//Ribosome//Translation//Genetic Information Processing	-	-	-
	novel-m0010-5p,novel-m0011-5p	Unigene0061001	TULP5	1516	4	2	0.014	2	2	PREDICTED: tubby-like F-box protein 5 [Ziziphus jujuba]	-	GO:0044464//cell part;GO:0043231//intracellular membrane-bounded organelle;GO:0016020//membrane;GO:0043227//membrane-bounded organelle;GO:0044444//cytoplasmic part;GO:0044424//intracellular part;GO:0005737//cytoplasm;GO:0043226//organelle;GO:0005623//cell;GO:0005622//intracellular;GO:0043229//intracellular organelle	-	GO:0065007//biological regulation;GO:0010468//regulation of gene expression;GO:0051707//response to other organism;GO:0050789//regulation of biological process;GO:0009605//response to external stimulus;GO:0019222//regulation of metabolic process;GO:0009607//response to biotic stimulus;GO:0051704//multi-organism process;GO:0043207//response to external biotic stimulus;GO:0050896//response to stimu…
	novel-m0010-5p,novel-m0011-5p	Unigene0071211	NPF8.3	1331	3.5	2	0.014	2	2	PREDICTED: protein NRT1/ PTR FAMILY 8.3-like [Phoenix dactylifera]	-	GO:0016020//membrane;GO:0044425//membrane part;GO:0031224//intrinsic component of membrane	-	GO:0071705//nitrogen compound transport;GO:0042886//amide transport;GO:0071702//organic substance transport;GO:1902578//single-organism localization;GO:0044765//single-organism transport;GO:0051179//localization;GO:0015833//peptide transport;GO:0006810//transport;GO:0051234//establishment of localization;GO:0044699//single-organism process
	novel-m0010-5p,novel-m0011-5p	Unigene0058516	HSP81-1	49	4.5	2	0.014	7	7	PREDICTED: heat shock cognate protein 80 [Nelumbo nucifera]	ko04141//Protein processing in endoplasmic reticulum//Folding, sorting and degradation//Genetic Information Processing;ko04626//Plant-pathogen interaction//Environmental adaptation//Organismal Systems	-	-	-
	novel-m0010-5p,novel-m0011-5p	Unigene0088065	Ttc1	207	3.5	2	0.014	34	34	hypothetical protein PRUPE_6G184800 [Prunus persica]	-	-	-	-
	novel-m0010-5p,novel-m0011-5p	Unigene0015242	-	505	4.5	2	0.014	6	6	PREDICTED: uncharacterized protein LOC104606490 [Nelumbo nucifera]	-	-	-	-
	novel-m0010-5p,novel-m0011-5p	Unigene0011064	spast	81	3	2	0.014	2	1	PREDICTED: spastin isoform X1 [Citrus sinensis]	-	GO:0044464//cell part;GO:0005623//cell	GO:0036094//small molecule binding;GO:0001883//purine nucleoside binding;GO:0005488//binding;GO:0016462//pyrophosphatase activity;GO:0097159//organic cyclic compound binding;GO:0016818//hydrolase activity, acting on acid anhydrides, in phosphorus-containing anhydrides;GO:0001882//nucleoside binding;GO:1901363//heterocyclic compound binding;GO:0032549//ribonucleoside binding;GO:0097367//carbohydra…	GO:0034613//cellular protein localization;GO:0008104//protein localization;GO:0006886//intracellular protein transport;GO:0072662//protein localization to peroxisome;GO:0051179//localization;GO:0070727//cellular macromolecule localization;GO:0044710//single-organism metabolic process;GO:0032787//monocarboxylic acid metabolic process;GO:0006631//fatty acid metabolic process;GO:0015031//protein tra…
	novel-m0010-5p,novel-m0011-5p	Unigene0005034	rhp16	3051	4.5	2	0.014	2	2	PREDICTED: DNA repair protein RAD16 [Vitis vinifera]	-	-	GO:0001882//nucleoside binding;GO:0016818//hydrolase activity, acting on acid anhydrides, in phosphorus-containing anhydrides;GO:0043167//ion binding;GO:0001883//purine nucleoside binding;GO:0097159//organic cyclic compound binding;GO:0032550//purine ribonucleoside binding;GO:0043169//cation binding;GO:0097367//carbohydrate derivative binding;GO:0005488//binding;GO:0016462//pyrophosphatase activi…	-
	novel-m0010-5p,novel-m0011-5p	Unigene0073043	CBSPPR1	1385	4	2	0.014	2	2	PREDICTED: pentatricopeptide repeat-containing protein At5g10690 isoform X1 [Phoenix dactylifera]	-	-	-	-
	novel-m0010-5p,novel-m0011-5p	Unigene0055196	At3g01520	629	4	2	0.014	2	2	PREDICTED: universal stress protein PHOS32 [Phoenix dactylifera]	-	-	-	-
	novel-m0010-5p,novel-m0011-5p	Unigene0066442	RFS	229	4.5	2	0.014	2	2	PREDICTED: galactinol--sucrose galactosyltransferase [Vitis vinifera]	ko00052//Galactose metabolism//Carbohydrate metabolism//Metabolism	-	GO:0008378//galactosyltransferase activity;GO:0003824//catalytic activity;GO:0016758//transferase activity, transferring hexosyl groups;GO:0016740//transferase activity;GO:0016757//transferase activity, transferring glycosyl groups	-
	novel-m0010-5p,novel-m0011-5p	Unigene0089295	-	243	4.5	2	0.014	12	12	--	-	-	-	-
	novel-m0010-5p,novel-m0011-5p	Unigene0083193	At5g26707	1343	4.5	2	0.014	4	4	PREDICTED: glutamate--tRNA ligase, cytoplasmic [Nelumbo nucifera]	ko01100//Metabolic pathways//Global and Overview//Metabolism;ko01110//Biosynthesis of secondary metabolites//Global and Overview//Metabolism;ko01120//Microbial metabolism in diverse environments//Global and Overview//Metabolism;ko00970//Aminoacyl-tRNA biosynthesis//Translation//Genetic Information Processing;ko00860//Porphyrin and chlorophyll metabolism//Metabolism of cofactors and vitamins//Meta…	GO:0044424//intracellular part;GO:0005623//cell;GO:0044464//cell part;GO:0005737//cytoplasm;GO:0005622//intracellular;GO:0044444//cytoplasmic part	GO:0097159//organic cyclic compound binding;GO:0036094//small molecule binding;GO:0016874//ligase activity;GO:0001882//nucleoside binding;GO:0032549//ribonucleoside binding;GO:0032550//purine ribonucleoside binding;GO:0016876//ligase activity, forming aminoacyl-tRNA and related compounds;GO:0005488//binding;GO:0003824//catalytic activity;GO:1901363//heterocyclic compound binding;GO:0001883//purin…	GO:0009059//macromolecule biosynthetic process;GO:0006996//organelle organization;GO:0043038//amino acid activation;GO:0043436//oxoacid metabolic process;GO:1901564//organonitrogen compound metabolic process;GO:1901576//organic substance biosynthetic process;GO:0006006//glucose metabolic process;GO:0006725//cellular aromatic compound metabolic process;GO:0030163//protein catabolic process;GO:0044…
	novel-m0010-5p,novel-m0011-5p	Unigene0094501	SKIP24	566	4	2	0.014	2	2	PREDICTED: F-box protein SKIP24 isoform X2 [Phoenix dactylifera]	-	-	-	-
	novel-m0010-5p,novel-m0011-5p	Unigene0034812	NHX3	718	4	2	0.014	2	2	PREDICTED: sodium/hydrogen exchanger 2-like [Phoenix dactylifera]	-	-	-	-
	novel-m0010-5p,novel-m0011-5p	Unigene0043950	spast	81	3	2	0.014	2	1	PREDICTED: spastin isoform X1 [Theobroma cacao]	-	GO:0044464//cell part;GO:0005623//cell	GO:0097367//carbohydrate derivative binding;GO:0016462//pyrophosphatase activity;GO:0001883//purine nucleoside binding;GO:0032549//ribonucleoside binding;GO:0036094//small molecule binding;GO:0001882//nucleoside binding;GO:0016818//hydrolase activity, acting on acid anhydrides, in phosphorus-containing anhydrides;GO:0016817//hydrolase activity, acting on acid anhydrides;GO:0032550//purine ribonuc…	GO:0071704//organic substance metabolic process;GO:0044281//small molecule metabolic process;GO:0072594//establishment of protein localization to organelle;GO:0043574//peroxisomal transport;GO:0046907//intracellular transport;GO:1902578//single-organism localization;GO:0008152//metabolic process;GO:0072663//establishment of protein localization to peroxisome;GO:0016054//organic acid catabolic pro…
novel-m0059-3p	novel-m0059-3p	Unigene0049426	At1g54610	1879	3	4	0.016	1	1	PREDICTED: probable serine/threonine-protein kinase At1g54610 [Ziziphus jujuba]	-	-	GO:0005488//binding;GO:0004672//protein kinase activity;GO:0016740//transferase activity;GO:0032549//ribonucleoside binding;GO:1901363//heterocyclic compound binding;GO:0001883//purine nucleoside binding;GO:0003824//catalytic activity;GO:0097367//carbohydrate derivative binding;GO:0016772//transferase activity, transferring phosphorus-containing groups;GO:0097159//organic cyclic compound binding;…	GO:0008152//metabolic process;GO:0044260//cellular macromolecule metabolic process;GO:0009987//cellular process;GO:0044267//cellular protein metabolic process;GO:0071704//organic substance metabolic process;GO:0006793//phosphorus metabolic process;GO:0043170//macromolecule metabolic process;GO:0044237//cellular metabolic process;GO:0006464//cellular protein modification process;GO:0019538//protei…
	novel-m0059-3p	Unigene0062175	SMC1	2918	4.5	4	0.016	1	1	structural maintenance of chromosomes protein 1, partial [Chimonanthus praecox]	-	GO:0043231//intracellular membrane-bounded organelle;GO:0044424//intracellular part;GO:0005623//cell;GO:0043232//intracellular non-membrane-bounded organelle;GO:0043229//intracellular organelle;GO:0043227//membrane-bounded organelle;GO:0005622//intracellular;GO:0043228//non-membrane-bounded organelle;GO:0044464//cell part;GO:0043226//organelle;GO:0032991//macromolecular complex;GO:0043234//protei…	GO:0001883//purine nucleoside binding;GO:1901363//heterocyclic compound binding;GO:0005488//binding;GO:0005515//protein binding;GO:0097367//carbohydrate derivative binding;GO:0032549//ribonucleoside binding;GO:0036094//small molecule binding;GO:0097159//organic cyclic compound binding;GO:0032550//purine ribonucleoside binding;GO:0046983//protein dimerization activity;GO:0001882//nucleoside binding	GO:0044260//cellular macromolecule metabolic process;GO:0043170//macromolecule metabolic process;GO:0044763//single-organism cellular process;GO:0044237//cellular metabolic process;GO:1901360//organic cyclic compound metabolic process;GO:0006259//DNA metabolic process;GO:0000280//nuclear division;GO:0051716//cellular response to stimulus;GO:0071704//organic substance metabolic process;GO:0006807/…
	novel-m0059-3p	Unigene0059415	Dnajc2	1305	4.5	4	0.016	1	1	PREDICTED: dnaJ homolog subfamily C member 2 [Eucalyptus grandis]	-	-	-	-
	novel-m0059-3p	Unigene0096280	-	315	4	2	0.018	4	4	Golgin subfamily A member 4 [Theobroma cacao]	-	-	-	GO:0009987//cellular process;GO:0043170//macromolecule metabolic process;GO:0044260//cellular macromolecule metabolic process;GO:0006325//chromatin organization;GO:0044238//primary metabolic process;GO:0071704//organic substance metabolic process;GO:0010468//regulation of gene expression;GO:0060255//regulation of macromolecule metabolic process;GO:0016568//chromatin modification;GO:0010629//negat…
	novel-m0059-3p	Unigene0077218	CWC25	798	4	2	0.018	6	6	PREDICTED: pre-mRNA-splicing factor CWC25 homolog [Nelumbo nucifera]	-	-	-	-
	novel-m0059-3p	Unigene0042207	SDH	1271	4	2	0.018	3	3	ADH_zinc_N domain-containing protein/ADH_N domain-containing protein [Cephalotus follicularis]	ko01100//Metabolic pathways//Global and Overview//Metabolism;ko00040//Pentose and glucuronate interconversions//Carbohydrate metabolism//Metabolism;ko00051//Fructose and mannose metabolism//Carbohydrate metabolism//Metabolism	-	GO:0043169//cation binding;GO:0003824//catalytic activity;GO:0005488//binding;GO:0043167//ion binding	GO:0044699//single-organism process;GO:0044710//single-organism metabolic process;GO:0008152//metabolic process
	novel-m0059-3p	Unigene0047189	UGT82A1	255	4.5	2	0.018	2	2	PREDICTED: UDP-glycosyltransferase 82A1 [Prunus mume]	-	-	GO:0016740//transferase activity;GO:0003824//catalytic activity	-
	novel-m0059-3p	Unigene0087640	SNRNP48	430	3.5	4	0.016	1	1	PREDICTED: U11/U12 small nuclear ribonucleoprotein 48 kDa protein [Nelumbo nucifera]	-	-	-	-
	novel-m0059-3p	Unigene0070964	At4g22990	64	4.5	4	0.016	1	1	PREDICTED: SPX domain-containing membrane protein At4g22990 [Vitis vinifera]	-	-	-	GO:0009987//cellular process;GO:0044763//single-organism cellular process;GO:0044699//single-organism process
	novel-m0059-3p	Unigene0067234	At2g43090	444	4	3	0.036	2	2	Aconitase_C domain-containing protein [Cephalotus follicularis]	ko01100//Metabolic pathways//Global and Overview//Metabolism;ko01110//Biosynthesis of secondary metabolites//Global and Overview//Metabolism;ko01230//Biosynthesis of amino acids//Global and Overview//Metabolism;ko01210//2-Oxocarboxylic acid metabolism//Global and Overview//Metabolism;ko00290//Valine, leucine and isoleucine biosynthesis//Amino acid metabolism//Metabolism;ko00660//C5-Branched dibas…	GO:0044444//cytoplasmic part;GO:0005622//intracellular;GO:0005829//cytosol;GO:0044424//intracellular part;GO:0044445//cytosolic part;GO:0005737//cytoplasm;GO:0005623//cell;GO:0044464//cell part	-	GO:0006551//leucine metabolic process;GO:0006520//cellular amino acid metabolic process;GO:1901564//organonitrogen compound metabolic process;GO:0044281//small molecule metabolic process;GO:0006807//nitrogen compound metabolic process;GO:0043436//oxoacid metabolic process;GO:0009081//branched-chain amino acid metabolic process;GO:0071704//organic substance metabolic process;GO:0044699//single-org…
	novel-m0059-3p	Unigene0055695	PUR2	232	4	4	0.016	1	1	PREDICTED: phosphoribosylamine--glycine ligase isoform X1 [Nelumbo nucifera]	ko01100//Metabolic pathways//Global and Overview//Metabolism;ko01110//Biosynthesis of secondary metabolites//Global and Overview//Metabolism;ko01130//Biosynthesis of antibiotics//Global and Overview//Metabolism;ko00230//Purine metabolism//Nucleotide metabolism//Metabolism	GO:0044435//plastid part;GO:0044464//cell part;GO:0005622//intracellular;GO:0043227//membrane-bounded organelle;GO:0044444//cytoplasmic part;GO:0043226//organelle;GO:0044422//organelle part;GO:0009536//plastid;GO:0044446//intracellular organelle part;GO:0043231//intracellular membrane-bounded organelle;GO:0005737//cytoplasm;GO:0009532//plastid stroma;GO:0044424//intracellular part;GO:0005623//cel…	GO:0036094//small molecule binding;GO:0001882//nucleoside binding;GO:0016879//ligase activity, forming carbon-nitrogen bonds;GO:0003824//catalytic activity;GO:0016874//ligase activity;GO:1901363//heterocyclic compound binding;GO:0097367//carbohydrate derivative binding;GO:0032549//ribonucleoside binding;GO:0043169//cation binding;GO:0001883//purine nucleoside binding;GO:0032550//purine ribonucleo…	GO:0006144//purine nucleobase metabolic process;GO:0044249//cellular biosynthetic process;GO:0009168//purine ribonucleoside monophosphate biosynthetic process;GO:0009259//ribonucleotide metabolic process;GO:0044238//primary metabolic process;GO:0034641//cellular nitrogen compound metabolic process;GO:0046390//ribose phosphate biosynthetic process;GO:0006164//purine nucleotide biosynthetic process…
	novel-m0059-3p	Unigene0026938	SPAC56F8.03	3132	4.5	4	0.016	1	0.5	PREDICTED: eukaryotic translation initiation factor 5B-like [Nelumbo nucifera]	ko03013//RNA transport//Translation//Genetic Information Processing	-	GO:0097159//organic cyclic compound binding;GO:0005488//binding;GO:1901363//heterocyclic compound binding	-
	novel-m0059-3p	Unigene0052437	TIR1	1998	4	4	0.016	1	0.5	PREDICTED: protein TRANSPORT INHIBITOR RESPONSE 1-like [Sesamum indicum]	ko04075//Plant hormone signal transduction//Signal transduction//Environmental Information Processing	-	-	-
	novel-m0059-3p	Unigene0069729	-	134	4.5	2	0.018	2	2	orf107b gene product (mitochondrion) [Beta vulgaris subsp. vulgaris] [Beta vulgaris]	-	-	-	-
	novel-m0059-3p	Unigene0066461	ORP1C	30	4	2	0.018	3	3	PREDICTED: oxysterol-binding protein-related protein 1C [Amborella trichopoda]	-	-	-	-
	novel-m0059-3p	Unigene0076139	CER1	748	4.5	4	0.016	1	1	protein ECERIFERUM 1-like [Ananas comosus]	ko01110//Biosynthesis of secondary metabolites//Global and Overview//Metabolism;ko00073//Cutin, suberine and wax biosynthesis//Lipid metabolism//Metabolism	GO:0016020//membrane;GO:0031224//intrinsic component of membrane;GO:0044425//membrane part	GO:0003824//catalytic activity	GO:0032787//monocarboxylic acid metabolic process;GO:0006631//fatty acid metabolic process;GO:0009987//cellular process;GO:0044710//single-organism metabolic process;GO:0008152//metabolic process;GO:0044255//cellular lipid metabolic process;GO:0044699//single-organism process;GO:0043436//oxoacid metabolic process;GO:0006629//lipid metabolic process;GO:0044238//primary metabolic process;GO:0044237…
	novel-m0059-3p	Unigene0060272	chmp5	976	4.5	4	0.016	1	0.5	Snf7 [Corchorus capsularis]	ko04144//Endocytosis//Transport and catabolism//Cellular Processes	-	-	-
	novel-m0059-3p	Unigene0063462	HT1	697	4	4	0.016	1	1	PREDICTED: serine/threonine-protein kinase HT1 isoform X3 [Glycine max]	-	-	GO:0097159//organic cyclic compound binding;GO:0016301//kinase activity;GO:1901363//heterocyclic compound binding;GO:0001882//nucleoside binding;GO:0004672//protein kinase activity;GO:0005488//binding;GO:0032550//purine ribonucleoside binding;GO:0003824//catalytic activity;GO:0097367//carbohydrate derivative binding;GO:0016740//transferase activity;GO:0001883//purine nucleoside binding;GO:0016773…	GO:0044267//cellular protein metabolic process;GO:0016043//cellular component organization;GO:0006996//organelle organization;GO:0044699//single-organism process;GO:0044763//single-organism cellular process;GO:0009987//cellular process;GO:0043170//macromolecule metabolic process;GO:0008152//metabolic process;GO:0006464//cellular protein modification process;GO:0044238//primary metabolic process;G…
	novel-m0059-3p	Unigene0049389	RS40	972	4.5	2	0.018	4	4	PREDICTED: serine/arginine-rich splicing factor RS41 isoform X1 [Nelumbo nucifera]	ko03040//Spliceosome//Transcription//Genetic Information Processing	-	-	-
	novel-m0059-3p	Unigene0063795	UGT92A1	43	4.5	4	0.016	1	1	PREDICTED: UDP-glycosyltransferase 92A1-like [Vitis vinifera]	-	-	GO:0016740//transferase activity;GO:0003824//catalytic activity;GO:0016757//transferase activity, transferring glycosyl groups;GO:0016758//transferase activity, transferring hexosyl groups	-
	novel-m0059-3p	Unigene0063138	HAT14	1739	3	4	0.016	1	1	PREDICTED: homeobox-leucine zipper protein HOX11-like [Nelumbo nucifera]	-	GO:0043227//membrane-bounded organelle;GO:0043229//intracellular organelle;GO:0043226//organelle;GO:0044464//cell part;GO:0005622//intracellular;GO:0005623//cell;GO:0044424//intracellular part;GO:0043231//intracellular membrane-bounded organelle	GO:0005488//binding;GO:0097159//organic cyclic compound binding;GO:1901363//heterocyclic compound binding;GO:0003677//DNA binding;GO:0001071//nucleic acid binding transcription factor activity;GO:0003676//nucleic acid binding	GO:0050789//regulation of biological process;GO:0010468//regulation of gene expression;GO:0009058//biosynthetic process;GO:0071704//organic substance metabolic process;GO:0009059//macromolecule biosynthetic process;GO:0019222//regulation of metabolic process;GO:0008152//metabolic process;GO:0065007//biological regulation;GO:0009987//cellular process;GO:0043170//macromolecule metabolic process;GO:…
	novel-m0059-3p	Unigene0053557	PF13_0198	499	4.5	4	0.016	1	1	PREDICTED: histone-lysine N-methyltransferase, H3 lysine-79 specific-like isoform X1 [Gossypium raimondii]	-	-	-	-
	novel-m0059-3p	Unigene0040668	ASPG1	637	3.5	3	0.036	2	2	PREDICTED: protein ASPARTIC PROTEASE IN GUARD CELL 1 [Nelumbo nucifera]	-	-	GO:0003824//catalytic activity;GO:0016787//hydrolase activity	-
	novel-m0059-3p	Unigene0067373	B3GALT7	11	4.5	2	0.018	4	1.33333	PREDICTED: beta-1,3-galactosyltransferase 7 [Nelumbo nucifera]	-	GO:0031224//intrinsic component of membrane;GO:0016020//membrane;GO:0044425//membrane part	GO:0016758//transferase activity, transferring hexosyl groups;GO:0016740//transferase activity;GO:0003824//catalytic activity;GO:0016757//transferase activity, transferring glycosyl groups	GO:0006464//cellular protein modification process;GO:0009987//cellular process;GO:0008152//metabolic process;GO:0019538//protein metabolic process;GO:0044238//primary metabolic process;GO:0044237//cellular metabolic process;GO:0043412//macromolecule modification;GO:0044260//cellular macromolecule metabolic process;GO:0036211//protein modification process;GO:0044267//cellular protein metabolic pro…
	novel-m0059-3p	Unigene0030373	-	2264	4	2	0.018	3	1.5	PREDICTED: histone H3.v1-like isoform X2 [Nelumbo nucifera]	-	-	-	-
	novel-m0059-3p	Unigene0048512	STP14	994	3	4	0.016	1	1	PREDICTED: sugar transport protein 14-like [Phoenix dactylifera]	-	GO:0044425//membrane part;GO:0031224//intrinsic component of membrane;GO:0016020//membrane	GO:0003824//catalytic activity;GO:0016491//oxidoreductase activity;GO:0016628//oxidoreductase activity, acting on the CH-CH group of donors, NAD or NADP as acceptor;GO:0022857//transmembrane transporter activity;GO:0016627//oxidoreductase activity, acting on the CH-CH group of donors;GO:0005215//transporter activity	GO:0044763//single-organism cellular process;GO:0006810//transport;GO:0044710//single-organism metabolic process;GO:0044765//single-organism transport;GO:0051234//establishment of localization;GO:0051179//localization;GO:0008152//metabolic process;GO:1902578//single-organism localization;GO:0044699//single-organism process;GO:0009987//cellular process
	novel-m0059-3p	Unigene0041717	ybeY	1289	3.5	4	0.016	1	1	Haloacid dehalogenase-like hydrolase family protein isoform 2 [Theobroma cacao]	-	-	GO:0016787//hydrolase activity;GO:0003824//catalytic activity	GO:0008152//metabolic process;GO:0043170//macromolecule metabolic process;GO:0044238//primary metabolic process;GO:0071704//organic substance metabolic process
	novel-m0059-3p	Unigene0080405	OASB	115	4	2	0.018	14	14	PREDICTED: cysteine synthase-like [Nelumbo nucifera]	ko01100//Metabolic pathways//Global and Overview//Metabolism;ko01110//Biosynthesis of secondary metabolites//Global and Overview//Metabolism;ko01130//Biosynthesis of antibiotics//Global and Overview//Metabolism;ko01120//Microbial metabolism in diverse environments//Global and Overview//Metabolism;ko01200//Carbon metabolism//Global and Overview//Metabolism;ko01230//Biosynthesis of amino acids//Glo…	-	GO:0003824//catalytic activity	GO:0044249//cellular biosynthetic process;GO:0044699//single-organism process;GO:0016053//organic acid biosynthetic process;GO:0044272//sulfur compound biosynthetic process;GO:0006563//L-serine metabolic process;GO:0000096//sulfur amino acid metabolic process;GO:0006790//sulfur compound metabolic process;GO:0006520//cellular amino acid metabolic process;GO:0044763//single-organism cellular proces…
	novel-m0059-3p	Unigene0075280	MBR1	484	4	2	0.018	2	1	PREDICTED: RING finger protein 165-like [Nelumbo nucifera]	-	-	-	-
	novel-m0059-3p	Unigene0096116	CYP98A2	362	4.5	2	0.018	3	3	PREDICTED: cytochrome P450 98A2 [Populus euphratica]	ko01100//Metabolic pathways//Global and Overview//Metabolism;ko01110//Biosynthesis of secondary metabolites//Global and Overview//Metabolism;ko00940//Phenylpropanoid biosynthesis//Biosynthesis of other secondary metabolites//Metabolism;ko00941//Flavonoid biosynthesis//Biosynthesis of other secondary metabolites//Metabolism;ko00945//Stilbenoid, diarylheptanoid and gingerol biosynthesis//Biosynthes…	-	GO:0046906//tetrapyrrole binding;GO:0043167//ion binding;GO:0003824//catalytic activity;GO:0046872//metal ion binding;GO:0016709//oxidoreductase activity, acting on paired donors, with incorporation or reduction of molecular oxygen, NAD(P)H as one donor, and incorporation of one atom of oxygen;GO:0004497//monooxygenase activity;GO:0005488//binding;GO:0016705//oxidoreductase activity, acting on pa…	GO:0008152//metabolic process;GO:0044710//single-organism metabolic process;GO:0044699//single-organism process
	novel-m0059-3p	Unigene0026961	CDC73	33	4	2	0.018	2	2	PREDICTED: protein CDC73 homolog [Nelumbo nucifera]	-	-	-	GO:0044707//single-multicellular organism process;GO:0048856//anatomical structure development;GO:0032502//developmental process;GO:0048731//system development;GO:0007275//multicellular organism development;GO:0000003//reproduction;GO:0044699//single-organism process;GO:0044767//single-organism developmental process;GO:0061458//reproductive system development;GO:0048608//reproductive structure de…
	novel-m0059-3p	Unigene0100292	BTF3	638	3.5	2	0.018	3	3	PREDICTED: nascent polypeptide-associated complex subunit beta-like isoform X2 [Nelumbo nucifera]	-	-	-	GO:0050789//regulation of biological process;GO:0010468//regulation of gene expression;GO:0060255//regulation of macromolecule metabolic process;GO:0019222//regulation of metabolic process;GO:0065007//biological regulation
	novel-m0059-3p	Unigene0062275	-	509	3.5	4	0.016	1	0.333333	--	-	-	-	-
	novel-m0059-3p	Unigene0067732	CYCD1-1	822	4.5	2	0.018	3	3	PREDICTED: cyclin-D1-1 [Nelumbo nucifera]	-	-	-	-
	novel-m0059-3p	Unigene0076680	PUB10	1852	4	4	0.016	1	1	C2 domain-containing protein/Arm domain-containing protein [Cephalotus follicularis]	-	-	GO:0003824//catalytic activity	-
	novel-m0059-3p	Unigene0062274	-	509	3.5	4	0.016	1	0.333333	--	-	-	-	-
	novel-m0059-3p	Unigene0024305	EMB1025	317	3.5	4	0.016	1	0.5	PREDICTED: pentatricopeptide repeat-containing protein At4g11690-like [Vitis vinifera]	-	-	-	-
	novel-m0059-3p	Unigene0045874	-	592	2.5	2	0.018	2	1	PREDICTED: heavy metal-associated isoprenylated plant protein 3-like [Nelumbo nucifera]	-	-	-	-
	novel-m0059-3p	Unigene0004473	Fam32a	85	4.5	3	0.036	2	2	PREDICTED: protein FAM32A isoform X1 [Nelumbo nucifera]	-	-	-	-
	novel-m0059-3p	Unigene0045819	-	1449	4	2	0.018	5	2.5	PREDICTED: midasin-like [Nelumbo nucifera]	-	-	-	-
	novel-m0059-3p	Unigene0054907	-	504	4	2	0.018	2	2	PREDICTED: protein ANTI-SILENCING 1-like [Nelumbo nucifera]	-	-	-	-
	novel-m0059-3p	Unigene0040422	GBF3	540	3	2	0.018	5	2.5	PREDICTED: common plant regulatory factor 1-like isoform X2 [Vigna radiata var. radiata] [Vigna radiata]	-	-	-	GO:0009059//macromolecule biosynthetic process;GO:0043170//macromolecule metabolic process;GO:0008152//metabolic process;GO:0009987//cellular process;GO:0009058//biosynthetic process;GO:0071704//organic substance metabolic process;GO:0034645//cellular macromolecule biosynthetic process;GO:0044260//cellular macromolecule metabolic process;GO:0044249//cellular biosynthetic process;GO:1901576//organ…
	novel-m0059-3p	Unigene0057497	TUBB1	291	4	2	0.018	11	11	PREDICTED: tubulin beta-1 chain [Vitis vinifera]	ko04145//Phagosome//Transport and catabolism//Cellular Processes	GO:0015630//microtubule cytoskeleton;GO:0005623//cell;GO:0032991//macromolecular complex;GO:0044464//cell part;GO:0005622//intracellular;GO:0043229//intracellular organelle;GO:0005856//cytoskeleton;GO:0043232//intracellular non-membrane-bounded organelle;GO:0044424//intracellular part;GO:0043228//non-membrane-bounded organelle;GO:0043226//organelle	GO:0097367//carbohydrate derivative binding;GO:0036094//small molecule binding;GO:0016817//hydrolase activity, acting on acid anhydrides;GO:0005488//binding;GO:0001882//nucleoside binding;GO:0016787//hydrolase activity;GO:0097159//organic cyclic compound binding;GO:0016462//pyrophosphatase activity;GO:1901363//heterocyclic compound binding;GO:0005198//structural molecule activity;GO:0003824//cata…	GO:0034622//cellular macromolecular complex assembly;GO:0044763//single-organism cellular process;GO:0006461//protein complex assembly;GO:0071840//cellular component organization or biogenesis;GO:0070271//protein complex biogenesis;GO:0009987//cellular process;GO:0071822//protein complex subunit organization;GO:0022607//cellular component assembly;GO:0043933//macromolecular complex subunit organi…
	novel-m0059-3p	Unigene0006950	-	195	4	2	0.018	2	2	LOW QUALITY PROTEIN: DUF4378 domain-containing protein, partial [Cephalotus follicularis]	-	-	-	-
	novel-m0059-3p	Unigene0088290	ASIL2	242	3.5	2	0.018	3	3	PREDICTED: trihelix transcription factor ASIL1 [Amborella trichopoda]	-	-	-	-
	novel-m0059-3p	Unigene0019566	RANGAP1	1770	4.5	2	0.018	3	1.5	RAN GTPase-activating protein 1 [Anthurium amnicola]	ko03013//RNA transport//Translation//Genetic Information Processing	-	-	-
	novel-m0059-3p	Unigene0012293	ssh4	1269	4.5	2	0.018	2	2	SPla/RYanodine receptor domain-containing protein [Theobroma cacao]	-	-	-	-
	novel-m0059-3p	Unigene0008578	-	169	4.5	4	0.016	1	1	PREDICTED: keratin, type II cytoskeletal 5 isoform X1 [Sesamum indicum]	-	-	-	-
	novel-m0059-3p	Unigene0065411	-	127	4.5	2	0.018	2	2	DNA-directed RNA polymerase subunit beta', partial [Anthurium amnicola]	-	-	-	-
	novel-m0059-3p	Unigene0046361	-	595	4.5	2	0.018	23	23	hypothetical protein PRUPE_ppa013160mg [Prunus persica]	-	-	-	-
	novel-m0059-3p	Unigene0065648	TAF12	1049	4	4	0.016	1	1	PREDICTED: transcription initiation factor TFIID subunit 12 isoform X1 [Nelumbo nucifera]	ko03022//Basal transcription factors//Transcription//Genetic Information Processing	-	-	GO:0006139//nucleobase-containing compound metabolic process;GO:0010467//gene expression;GO:0034641//cellular nitrogen compound metabolic process;GO:0006807//nitrogen compound metabolic process;GO:0009987//cellular process;GO:0090304//nucleic acid metabolic process;GO:0044237//cellular metabolic process;GO:0044238//primary metabolic process;GO:0044249//cellular biosynthetic process;GO:0009058//bi…
	novel-m0059-3p	Unigene0052695	PQL3	3202	4	2	0.018	25	25	Histone H2A deubiquitinase MYSM1 [Anthurium amnicola]	-	-	-	-
	novel-m0059-3p	Unigene0101339	-	53	3.5	2	0.018	2	2	--	-	-	-	-
	novel-m0059-3p	Unigene0081621	At1g65660	377	4	4	0.016	1	1	pre-mRNA-splicing factor SLU7 [Ananas comosus]	ko03040//Spliceosome//Transcription//Genetic Information Processing	-	-	-
	novel-m0059-3p	Unigene0085380	IGHMBP2	2197	4.5	2	0.018	2	2	PREDICTED: uncharacterized ATP-dependent helicase C29A10.10c-like isoform X1 [Phoenix dactylifera]	-	-	-	-
	novel-m0059-3p	Unigene0054515	TT12	1631	4	2	0.018	6	3	PREDICTED: protein DETOXIFICATION 20-like [Nelumbo nucifera]	-	GO:0031224//intrinsic component of membrane;GO:0044425//membrane part;GO:0016020//membrane	GO:0022857//transmembrane transporter activity;GO:0015291//secondary active transmembrane transporter activity;GO:0022804//active transmembrane transporter activity;GO:0005215//transporter activity	GO:0044699//single-organism process;GO:0044763//single-organism cellular process;GO:0009987//cellular process
	novel-m0059-3p	Unigene0068799	Acin1	1244	4	2	0.018	3	3	PREDICTED: apoptotic chromatin condensation inducer in the nucleus [Jatropha curcas]	ko03040//Spliceosome//Transcription//Genetic Information Processing;ko03013//RNA transport//Translation//Genetic Information Processing;ko03015//mRNA surveillance pathway//Translation//Genetic Information Processing	-	-	GO:0044699//single-organism process;GO:0016043//cellular component organization;GO:0090304//nucleic acid metabolic process;GO:0044763//single-organism cellular process;GO:0043170//macromolecule metabolic process;GO:0051128//regulation of cellular component organization;GO:0006139//nucleobase-containing compound metabolic process;GO:0034641//cellular nitrogen compound metabolic process;GO:0050794/…
	novel-m0059-3p	Unigene0060648	CYCL1-1	479	4	4	0.016	1	1	PREDICTED: cyclin-L1-1-like [Nelumbo nucifera]	-	-	-	-
	novel-m0059-3p	Unigene0092442	At4g18930	736	3	4	0.016	1	1	RNA ligase/cyclic nucleotide phosphodiesterase family protein, partial [Chimonanthus praecox]	-	-	-	-
	novel-m0059-3p	Unigene0000257	Os06g0675700	1441	4.5	4	0	1	1	PREDICTED: alpha-glucosidase [Nelumbo nucifera]	ko01100//Metabolic pathways//Global and Overview//Metabolism;ko00500//Starch and sucrose metabolism//Carbohydrate metabolism//Metabolism;ko00052//Galactose metabolism//Carbohydrate metabolism//Metabolism	-	GO:0016798//hydrolase activity, acting on glycosyl bonds;GO:0003824//catalytic activity;GO:0004553//hydrolase activity, hydrolyzing O-glycosyl compounds;GO:0016787//hydrolase activity;GO:0090599//alpha-glucosidase activity;GO:0015926//glucosidase activity;GO:0005488//binding	GO:0044238//primary metabolic process;GO:0008152//metabolic process
	novel-m0059-3p	Unigene0071176	POK2	2044	4.5	4	0.016	1	1	PREDICTED: kinesin-like protein KIN-12F isoform X1 [Nelumbo nucifera]	-	GO:0043232//intracellular non-membrane-bounded organelle;GO:0043228//non-membrane-bounded organelle;GO:0032991//macromolecular complex;GO:0005622//intracellular;GO:0043234//protein complex;GO:0044424//intracellular part;GO:0044446//intracellular organelle part;GO:0043226//organelle;GO:0044464//cell part;GO:0044422//organelle part;GO:0043229//intracellular organelle;GO:0015630//microtubule cytoske…	GO:0005488//binding	GO:0044699//single-organism process;GO:0044763//single-organism cellular process;GO:0009987//cellular process
	novel-m0059-3p	Unigene0000260	-	155	3	4	0	1	1	--	-	-	-	-
	novel-m0059-3p	Unigene0054119	YMR099C	448	3.5	2	0.018	2	2	Galactose mutarotase-like superfamily protein isoform 1 [Theobroma cacao]	ko01100//Metabolic pathways//Global and Overview//Metabolism;ko01110//Biosynthesis of secondary metabolites//Global and Overview//Metabolism;ko01130//Biosynthesis of antibiotics//Global and Overview//Metabolism;ko01120//Microbial metabolism in diverse environments//Global and Overview//Metabolism;ko00010//Glycolysis / Gluconeogenesis//Carbohydrate metabolism//Metabolism	-	GO:0005488//binding;GO:0003824//catalytic activity	GO:0044238//primary metabolic process;GO:0008152//metabolic process
	novel-m0059-3p	Unigene0104137	LECRK71	121	3.5	4	0.016	1	1	PREDICTED: probable L-type lectin-domain containing receptor kinase VII.2 [Juglans regia]	-	-	GO:0004672//protein kinase activity;GO:0005488//binding;GO:0016740//transferase activity;GO:0016301//kinase activity;GO:0016773//phosphotransferase activity, alcohol group as acceptor;GO:0003824//catalytic activity;GO:0004713//protein tyrosine kinase activity;GO:0016772//transferase activity, transferring phosphorus-containing groups	GO:0036211//protein modification process;GO:0006464//cellular protein modification process;GO:0044237//cellular metabolic process;GO:0008152//metabolic process;GO:0016310//phosphorylation;GO:0043170//macromolecule metabolic process;GO:0006796//phosphate-containing compound metabolic process;GO:0006468//protein phosphorylation;GO:0019538//protein metabolic process;GO:0006793//phosphorus metabolic …
	novel-m0059-3p	Unigene0048952	At3g49730	444	4	2	0.018	2	2	Pentatricopeptide repeat-containing protein [Cynara cardunculus var. scolymus] [Cynara cardunculus]	-	-	-	-
	novel-m0059-3p	Unigene0060271	chmp5	1177	4.5	4	0.016	1	0.5	PREDICTED: charged multivesicular body protein 5-like [Populus euphratica]	ko04144//Endocytosis//Transport and catabolism//Cellular Processes	-	-	-
	novel-m0059-3p	Unigene0033896	PCMP-H11	591	3.5	4	0.016	1	1	PREDICTED: pentatricopeptide repeat-containing protein At1g31920 [Nelumbo nucifera]	-	-	-	GO:2000026//regulation of multicellular organismal development;GO:0016070//RNA metabolic process;GO:0006139//nucleobase-containing compound metabolic process;GO:0044260//cellular macromolecule metabolic process;GO:0008152//metabolic process;GO:0048509//regulation of meristem development;GO:0050793//regulation of developmental process;GO:0034641//cellular nitrogen compound metabolic process;GO:190…
	novel-m0059-3p	Unigene0048018	GT-3B	597	4	3	0.036	2	1	PREDICTED: trihelix transcription factor GT-3b-like [Nelumbo nucifera]	-	-	-	-
	novel-m0059-3p	Unigene0092826	-	324	3.5	4	0.016	1	1	Protein fantom [Anthurium amnicola]	-	-	-	GO:0009987//cellular process;GO:0016043//cellular component organization;GO:0000003//reproduction;GO:0003006//developmental process involved in reproduction;GO:0032502//developmental process;GO:0071840//cellular component organization or biogenesis;GO:0022414//reproductive process;GO:0048856//anatomical structure development
	novel-m0059-3p	Unigene0018687	-	137	3	4	0.016	1	1	PREDICTED: uncharacterized protein LOC102627984 [Citrus sinensis]	-	-	-	-
	novel-m0059-3p	Unigene0048020	GT-3B	323	3.5	2	0.018	4	2	PREDICTED: trihelix transcription factor GT-3b-like, partial [Vigna angularis]	-	GO:0044424//intracellular part;GO:0043227//membrane-bounded organelle;GO:0043231//intracellular membrane-bounded organelle;GO:0043226//organelle;GO:0044464//cell part;GO:0005622//intracellular;GO:0043229//intracellular organelle;GO:0005623//cell	GO:1901363//heterocyclic compound binding;GO:0097159//organic cyclic compound binding;GO:0001071//nucleic acid binding transcription factor activity;GO:0003676//nucleic acid binding;GO:0005488//binding;GO:0003677//DNA binding	GO:0044237//cellular metabolic process;GO:0071704//organic substance metabolic process;GO:0010468//regulation of gene expression;GO:0050789//regulation of biological process;GO:0009058//biosynthetic process;GO:0019222//regulation of metabolic process;GO:0043170//macromolecule metabolic process;GO:0065007//biological regulation;GO:0060255//regulation of macromolecule metabolic process;GO:1901576//…
	novel-m0059-3p	Unigene0007239	-	116	2.5	2	0.018	2	2	Uncharacterized protein TCM_016791 [Theobroma cacao]	-	-	-	-
	novel-m0059-3p	Unigene0043405	AP5M	1967	3	4	0.016	1	1	PREDICTED: AP-5 complex subunit mu [Amborella trichopoda]	-	-	-	-
	novel-m0059-3p	Unigene0069227	-	682	4.5	4	0.016	1	1	PREDICTED: uncharacterized protein LOC104602759 [Nelumbo nucifera]	-	-	-	-
	novel-m0059-3p	Unigene0052215	-	963	4.5	2	0.018	3	3	PREDICTED: zinc finger CCCH domain-containing protein 13 [Nelumbo nucifera]	-	-	-	-
	novel-m0059-3p	Unigene0096654	At1g09380	197	3	2	0.018	5	5	PREDICTED: WAT1-related protein At1g09380-like [Musa acuminata subsp. malaccensis] [Musa acuminata]	-	-	-	-
	novel-m0059-3p	Unigene0111665	rpsO	172	2	4	0.016	1	1	PREDICTED: cell wall protein RBR3 [Amborella trichopoda]	-	GO:0005623//cell;GO:0044464//cell part;GO:0005622//intracellular	-	-
	novel-m0059-3p	Unigene0033143	At4g28440	668	4.5	2	0.018	3	3	PREDICTED: uncharacterized protein At4g28440 [Nelumbo nucifera]	ko03030//DNA replication//Replication and repair//Genetic Information Processing;ko03420//Nucleotide excision repair//Replication and repair//Genetic Information Processing;ko03440//Homologous recombination//Replication and repair//Genetic Information Processing;ko03430//Mismatch repair//Replication and repair//Genetic Information Processing	-	-	-
	novel-m0059-3p	Unigene0010620	-	449	4.5	4	0.016	1	1	PREDICTED: uncharacterized protein LOC105795028 [Gossypium raimondii]	-	-	-	-
	novel-m0059-3p	Unigene0092454	PF13_0198	1500	4.5	4	0.016	1	1	PREDICTED: probable serine/threonine-protein kinase kinX [Daucus carota subsp. sativus] [Daucus carota]	-	-	-	-
	novel-m0059-3p	Unigene0072229	MADS16	285	4.5	3	0.036	3	1.5	APETALA-3-like protein [Chimonanthus praecox]	-	-	-	-
	novel-m0059-3p	Unigene0041902	-	571	4.5	4	0.016	1	0.5	PREDICTED: mucin-17 isoform X2 [Vitis vinifera]	-	-	-	-
	novel-m0059-3p	Unigene0113355	At1g50920	980	4.5	2	0.018	5	5	PREDICTED: nucleolar GTP-binding protein 1-like [Nicotiana tabacum]	ko03008//Ribosome biogenesis in eukaryotes//Translation//Genetic Information Processing	-	-	-
	novel-m0059-3p	Unigene0057460	SPL6	1573	3.5	4	0.016	1	1	PREDICTED: squamosa promoter-binding-like protein 1 [Nelumbo nucifera]	-	-	-	-
	novel-m0059-3p	Unigene0072347	NAP1;2	431	4.5	2	0.018	12	12	PREDICTED: nucleosome assembly protein 1;4 [Vitis vinifera]	-	-	-	-
	novel-m0059-3p	Unigene0011421	-	295	4.5	4	0.016	1	1	PREDICTED: uncharacterized protein LOC104592000 [Nelumbo nucifera]	-	-	-	-
	novel-m0059-3p	Unigene0070116	TBL2	68	4.5	2	0.018	2	2	PREDICTED: transducin beta-like protein 2 [Nelumbo nucifera]	-	-	-	-
	novel-m0059-3p	Unigene0081403	-	284	4	4	0.016	1	1	PREDICTED: meiosis arrest female protein 1-like [Capsicum annuum]	-	-	-	-
	novel-m0059-3p	Unigene0085339	-	3738	4.5	4	0.016	1	1	PREDICTED: uncharacterized protein LOC104607768 [Nelumbo nucifera]	-	GO:0030054//cell junction;GO:0005911//cell-cell junction	-	GO:0009987//cellular process;GO:0007010//cytoskeleton organization;GO:0048869//cellular developmental process;GO:0044767//single-organism developmental process;GO:0043933//macromolecular complex subunit organization;GO:0006996//organelle organization;GO:0032502//developmental process;GO:0007015//actin filament organization;GO:0000904//cell morphogenesis involved in differentiation;GO:0048468//cel…
	novel-m0059-3p	Unigene0059552	CNGC2	893	4	2	0.018	4	4	PREDICTED: cyclic nucleotide-gated ion channel 2 [Nelumbo nucifera]	ko04626//Plant-pathogen interaction//Environmental adaptation//Organismal Systems	GO:0016020//membrane;GO:0031224//intrinsic component of membrane;GO:0044425//membrane part	-	GO:0044765//single-organism transport;GO:0044699//single-organism process;GO:1902578//single-organism localization;GO:0006810//transport;GO:0009987//cellular process;GO:0006811//ion transport;GO:0051179//localization;GO:0044763//single-organism cellular process;GO:0051234//establishment of localization
	novel-m0059-3p	Unigene0061001	TULP5	1516	4.5	2	0.018	2	2	PREDICTED: tubby-like F-box protein 5 [Ziziphus jujuba]	-	GO:0044464//cell part;GO:0043231//intracellular membrane-bounded organelle;GO:0016020//membrane;GO:0043227//membrane-bounded organelle;GO:0044444//cytoplasmic part;GO:0044424//intracellular part;GO:0005737//cytoplasm;GO:0043226//organelle;GO:0005623//cell;GO:0005622//intracellular;GO:0043229//intracellular organelle	-	GO:0065007//biological regulation;GO:0010468//regulation of gene expression;GO:0051707//response to other organism;GO:0050789//regulation of biological process;GO:0009605//response to external stimulus;GO:0019222//regulation of metabolic process;GO:0009607//response to biotic stimulus;GO:0051704//multi-organism process;GO:0043207//response to external biotic stimulus;GO:0050896//response to stimu…
	novel-m0059-3p	Unigene0093594	PCAP1	398	4	2	0.018	2	2	PREDICTED: plasma membrane-associated cation-binding protein 1 [Eucalyptus grandis]	-	-	-	-
	novel-m0059-3p	Unigene0068990	GSNAP	1965	3	2	0.018	4	4	PREDICTED: gamma-soluble NSF attachment protein [Amborella trichopoda]	-	-	-	-
	novel-m0059-3p	Unigene0104707	P4H3	227	4.5	2	0.018	2	2	PREDICTED: probable prolyl 4-hydroxylase 3 [Raphanus sativus]	ko01100//Metabolic pathways//Global and Overview//Metabolism;ko00330//Arginine and proline metabolism//Amino acid metabolism//Metabolism	GO:0005622//intracellular;GO:0012505//endomembrane system;GO:0044432//endoplasmic reticulum part;GO:0043229//intracellular organelle;GO:0031984//organelle subcompartment;GO:0044422//organelle part;GO:0044424//intracellular part;GO:0043226//organelle;GO:0044444//cytoplasmic part;GO:0043231//intracellular membrane-bounded organelle;GO:0005783//endoplasmic reticulum;GO:0005737//cytoplasm;GO:0043227/…	GO:0016491//oxidoreductase activity;GO:0003824//catalytic activity;GO:0036094//small molecule binding;GO:0043167//ion binding;GO:0043169//cation binding;GO:0046914//transition metal ion binding;GO:0019842//vitamin binding;GO:0046872//metal ion binding;GO:0016705//oxidoreductase activity, acting on paired donors, with incorporation or reduction of molecular oxygen;GO:0005488//binding	GO:0008152//metabolic process;GO:0044699//single-organism process;GO:0044710//single-organism metabolic process
	novel-m0059-3p	Unigene0076840	sst4	1805	4.5	4	0.016	1	1	PREDICTED: rootletin-like [Gossypium raimondii]	-	-	-	-
	novel-m0059-3p	Unigene0067293	-	1633	4.5	4	0.016	1	1	PREDICTED: splicing factor 3A subunit 2 [Vitis vinifera]	-	-	-	-
	novel-m0059-3p	Unigene0073438	DPE2	639	4	2	0.018	4	4	PREDICTED: 4-alpha-glucanotransferase DPE2 isoform X2 [Nelumbo nucifera]	ko01100//Metabolic pathways//Global and Overview//Metabolism;ko00500//Starch and sucrose metabolism//Carbohydrate metabolism//Metabolism	-	-	-
	novel-m0059-3p	Unigene0062515	AGAL1	46	3.5	4	0.016	1	0.5	alpha-galactosidase [Chimonanthus praecox]	ko00561//Glycerolipid metabolism//Lipid metabolism//Metabolism;ko00052//Galactose metabolism//Carbohydrate metabolism//Metabolism;ko00600//Sphingolipid metabolism//Lipid metabolism//Metabolism;ko00603//Glycosphingolipid biosynthesis - globo series//Glycan biosynthesis and metabolism//Metabolism	-	GO:0003824//catalytic activity;GO:0015925//galactosidase activity;GO:0016798//hydrolase activity, acting on glycosyl bonds;GO:0004557//alpha-galactosidase activity;GO:0004553//hydrolase activity, hydrolyzing O-glycosyl compounds;GO:0016787//hydrolase activity	GO:0008152//metabolic process;GO:0044238//primary metabolic process
	novel-m0059-3p	Unigene0073734	-	495	4	4	0.016	1	1	DNA-dependent protein kinase catalytic subunit [Anthurium amnicola]	-	-	-	-
	novel-m0059-3p	Unigene0069402	-	389	4.5	4	0.016	1	1	--	-	-	-	-
	novel-m0059-3p	Unigene0092187	CIPK6	528	2.5	2	0.018	7	7	PREDICTED: CBL-interacting serine/threonine-protein kinase 6-like [Nelumbo nucifera]	-	GO:0005623//cell;GO:0043231//intracellular membrane-bounded organelle;GO:0043227//membrane-bounded organelle;GO:0044464//cell part;GO:0005622//intracellular;GO:0044424//intracellular part;GO:0043229//intracellular organelle;GO:0043226//organelle	GO:0016301//kinase activity;GO:0032550//purine ribonucleoside binding;GO:0032549//ribonucleoside binding;GO:0016740//transferase activity;GO:0016772//transferase activity, transferring phosphorus-containing groups;GO:0036094//small molecule binding;GO:0005488//binding;GO:0001883//purine nucleoside binding;GO:0016773//phosphotransferase activity, alcohol group as acceptor;GO:0097367//carbohydrate …	GO:0010817//regulation of hormone levels;GO:0044237//cellular metabolic process;GO:0006810//transport;GO:0006464//cellular protein modification process;GO:0007154//cell communication;GO:0019932//second-messenger-mediated signaling;GO:0006793//phosphorus metabolic process;GO:0065008//regulation of biological quality;GO:0032501//multicellular organismal process;GO:0065007//biological regulation;GO:…
	novel-m0059-3p	Unigene0032640	CHLP	533	2.5	2	0.018	2	2	pyridine nucleotide-disulfide oxidoreductase family protein [Populus tomentosa]	ko01100//Metabolic pathways//Global and Overview//Metabolism;ko01110//Biosynthesis of secondary metabolites//Global and Overview//Metabolism;ko00900//Terpenoid backbone biosynthesis//Metabolism of terpenoids and polyketides//Metabolism;ko00860//Porphyrin and chlorophyll metabolism//Metabolism of cofactors and vitamins//Metabolism	-	GO:0016491//oxidoreductase activity;GO:0003824//catalytic activity;GO:0016627//oxidoreductase activity, acting on the CH-CH group of donors	GO:1901566//organonitrogen compound biosynthetic process;GO:0009058//biosynthetic process;GO:0071704//organic substance metabolic process;GO:0018130//heterocycle biosynthetic process;GO:0006779//porphyrin-containing compound biosynthetic process;GO:0051188//cofactor biosynthetic process;GO:1901564//organonitrogen compound metabolic process;GO:0046483//heterocycle metabolic process;GO:1901362//org…
	novel-m0059-3p	Unigene0066261	-	1042	4.5	2	0.018	7	7	PREDICTED: early endosome antigen 1 [Nelumbo nucifera]	-	-	-	-
	novel-m0059-3p	Unigene0075890	Syncrip	5211	4	2	0.018	2	2	PREDICTED: nucleolin [Phoenix dactylifera]	-	-	-	-
	novel-m0059-3p	Unigene0041902	-	733	4.5	4	0.016	1	0.5	PREDICTED: mucin-17 isoform X2 [Vitis vinifera]	-	-	-	-
	novel-m0059-3p	Unigene0055686	PI4KB2	765	3	4	0.016	1	0.5	PREDICTED: LOW QUALITY PROTEIN: phosphatidylinositol 4-kinase beta 1 [Phoenix dactylifera]	-	-	-	-
	novel-m0059-3p	Unigene0086368	-	163	4.5	4	0.016	1	1	--	-	-	-	-
	novel-m0059-3p	Unigene0075692	Os06g0143900	531	3.5	2	0.018	3	3	PREDICTED: coatomer subunit beta'-1-like isoform X1 [Elaeis guineensis]	-	GO:0043234//protein complex;GO:0032991//macromolecular complex	-	GO:0006810//transport;GO:0071702//organic substance transport;GO:0015031//protein transport;GO:0045184//establishment of protein localization;GO:0051234//establishment of localization;GO:0008104//protein localization;GO:0051179//localization;GO:0033036//macromolecule localization
	novel-m0059-3p	Unigene0078569	DHX38	116	4.5	4	0.016	1	1	PREDICTED: pre-mRNA-splicing factor ATP-dependent RNA helicase DEAH7 [Nelumbo nucifera]	ko03040//Spliceosome//Transcription//Genetic Information Processing	-	GO:0097159//organic cyclic compound binding;GO:0016462//pyrophosphatase activity;GO:0032550//purine ribonucleoside binding;GO:0005488//binding;GO:0017111//nucleoside-triphosphatase activity;GO:0036094//small molecule binding;GO:0016787//hydrolase activity;GO:0001882//nucleoside binding;GO:0001883//purine nucleoside binding;GO:0016818//hydrolase activity, acting on acid anhydrides, in phosphorus-c…	-
	novel-m0059-3p	Unigene0045504	SCC3	386	4	4	0.016	1	1	PREDICTED: sister-chromatid cohesion protein 3 [Elaeis guineensis]	-	-	-	-
	novel-m0059-3p	Unigene0113060	-	1088	4.5	2	0.018	3	3	PREDICTED: uncharacterized protein LOC100242564 [Vitis vinifera]	-	-	-	-
	novel-m0059-3p	Unigene0047038	Rprd1b	465	3.5	2	0.018	2	2	PREDICTED: regulation of nuclear pre-mRNA domain-containing protein 1B-like [Nelumbo nucifera]	-	-	-	-
	novel-m0059-3p	Unigene0049390	RS40	972	4.5	2	0.018	8	8	PREDICTED: serine/arginine-rich splicing factor RS41 isoform X1 [Nelumbo nucifera]	ko03040//Spliceosome//Transcription//Genetic Information Processing	-	-	-
	novel-m0059-3p	Unigene0111990	TAF8	314	4.5	2	0.018	3	3	PREDICTED: transcription initiation factor TFIID subunit 8-like [Nelumbo nucifera]	ko03022//Basal transcription factors//Transcription//Genetic Information Processing	-	-	-
	novel-m0059-3p	Unigene0085885	-	42	4	4	0.016	1	1	PREDICTED: probable serine/threonine-protein kinase dyrk1 [Vitis vinifera]	-	-	-	-
	novel-m0059-3p	Unigene0044604	-	824	4.5	2	0.018	3	3	Protease precursor [Anthurium amnicola]	-	-	-	-
	novel-m0059-3p	Unigene0034130	CURT1A	161	4.5	2	0.018	2	2	PREDICTED: protein CURVATURE THYLAKOID 1A, chloroplastic-like [Populus euphratica]	-	-	-	-
	novel-m0059-3p	Unigene0011417	Cyp313a3	1843	4	4	0.016	1	1	PREDICTED: cytochrome P450 734A1-like [Nelumbo nucifera]	-	-	GO:0003824//catalytic activity;GO:0005488//binding	-
	novel-m0059-3p	Unigene0039531	HIPP26	848	4.5	4	0.016	1	0.5	PREDICTED: protein qua-1-like [Nelumbo nucifera]	-	GO:0071944//cell periphery;GO:0044464//cell part;GO:0030312//external encapsulating structure;GO:0005623//cell	GO:0005488//binding;GO:0043169//cation binding;GO:0043167//ion binding	GO:1902578//single-organism localization;GO:0044699//single-organism process;GO:0006811//ion transport;GO:0044765//single-organism transport;GO:0051234//establishment of localization;GO:0006812//cation transport;GO:0006810//transport;GO:0051179//localization
	novel-m0059-3p	Unigene0086291	-	277	3.5	2	0.018	2	2	--	-	-	-	-
	novel-m0059-3p	Unigene0032880	PCMP-H12	648	4	4	0.016	1	1	PREDICTED: pentatricopeptide repeat-containing protein At1g08070, chloroplastic-like [Nelumbo nucifera]	-	-	-	-
	novel-m0059-3p	Unigene0039655	CYP26-2	325	4	4	0.016	1	1	PREDICTED: peptidyl-prolyl cis-trans isomerase CYP26-2, chloroplastic [Elaeis guineensis]	-	-	-	-
	novel-m0059-3p	Unigene0010855	APUM3	78	4	2	0.018	2	2	PREDICTED: pumilio homolog 2-like [Nelumbo nucifera]	-	-	-	-
	novel-m0059-3p	Unigene0048952	At3g49730	474	4.5	4	0.016	1	1	Pentatricopeptide repeat-containing protein [Cynara cardunculus var. scolymus] [Cynara cardunculus]	-	-	-	-
	novel-m0059-3p	Unigene0048958	FKBP53	722	4.5	2	0.018	2	2	Peptidyl-prolyl cis-trans isomerase FKBP53 [Anthurium amnicola]	-	-	-	-
	novel-m0059-3p	Unigene0060281	HSP18.2	185	4.5	4	0.016	1	1	PREDICTED: 18.1 kDa class I heat shock protein [Theobroma cacao]	ko04141//Protein processing in endoplasmic reticulum//Folding, sorting and degradation//Genetic Information Processing	-	-	-
	novel-m0059-3p	Unigene0053809	44441	806	4.5	4	0.016	1	1	PREDICTED: developmental protein SEPALLATA 1 [Nelumbo nucifera]	-	GO:0044424//intracellular part;GO:0043231//intracellular membrane-bounded organelle;GO:0043229//intracellular organelle;GO:0044464//cell part;GO:0043226//organelle;GO:0005622//intracellular;GO:0005623//cell;GO:0043227//membrane-bounded organelle	GO:0016628//oxidoreductase activity, acting on the CH-CH group of donors, NAD or NADP as acceptor;GO:0005488//binding;GO:0001071//nucleic acid binding transcription factor activity;GO:0016627//oxidoreductase activity, acting on the CH-CH group of donors;GO:0003824//catalytic activity;GO:0005515//protein binding;GO:0016491//oxidoreductase activity	GO:0010468//regulation of gene expression;GO:0008152//metabolic process;GO:0019222//regulation of metabolic process;GO:0065007//biological regulation;GO:0009059//macromolecule biosynthetic process;GO:0043170//macromolecule metabolic process;GO:0050789//regulation of biological process;GO:0044260//cellular macromolecule metabolic process;GO:0044249//cellular biosynthetic process;GO:0034645//cellul…
	novel-m0059-3p	Unigene0053235	ARAD1	1174	3	4	0.016	1	1	probable arabinosyltransferase ARAD1 [Ananas comosus]	-	-	-	-
	novel-m0059-3p	Unigene0009419	PCMP-H40	713	3	2	0.018	4	4	PREDICTED: pentatricopeptide repeat-containing protein At3g12770-like [Elaeis guineensis]	-	-	-	-
	novel-m0059-3p	Unigene0010513	Os08g0360100	2908	4.5	2	0.018	3	3	PREDICTED: CRM-domain containing factor CFM3, chloroplastic/mitochondrial [Nelumbo nucifera]	-	-	-	-
	novel-m0059-3p	Unigene0065577	At1g69990	367	3.5	4	0.016	1	1	PREDICTED: inactive LRR receptor-like serine/threonine-protein kinase BIR2 [Vitis vinifera]	-	-	-	-
	novel-m0059-3p	Unigene0033481	-	109	4	4	0.016	1	0.333333	Actin-related protein 8, partial [Anthurium amnicola]	-	-	-	-
	novel-m0059-3p	Unigene0051720	RD21A	187	4.5	2	0.018	3	3	PREDICTED: low-temperature-induced cysteine proteinase [Vitis vinifera]	-	-	GO:0016787//hydrolase activity;GO:0070011//peptidase activity, acting on L-amino acid peptides;GO:0003824//catalytic activity;GO:0008233//peptidase activity	-
	novel-m0059-3p	Unigene0007647	PCKA	551	4.5	4	0.016	1	1	PREDICTED: phosphoenolpyruvate carboxykinase [ATP]-like [Juglans regia]	ko01100//Metabolic pathways//Global and Overview//Metabolism;ko01110//Biosynthesis of secondary metabolites//Global and Overview//Metabolism;ko01130//Biosynthesis of antibiotics//Global and Overview//Metabolism;ko01120//Microbial metabolism in diverse environments//Global and Overview//Metabolism;ko01200//Carbon metabolism//Global and Overview//Metabolism;ko00010//Glycolysis / Gluconeogenesis//Ca…	-	-	-
	novel-m0059-3p	Unigene0084277	-	418	4.5	4	0.016	1	1	--	-	-	-	-
	novel-m0059-3p	Unigene0075283	MBR1	484	4	2	0.018	2	1	PREDICTED: RING finger protein 165-like [Nelumbo nucifera]	-	-	-	-
	novel-m0059-3p	Unigene0012436	ATX1	987	3.5	2	0.018	6	6	copper-binding family protein [Populus trichocarpa]	-	-	GO:0043167//ion binding;GO:0005488//binding;GO:0043169//cation binding	-
	novel-m0059-3p	Unigene0046361	-	430	4.5	2	0.018	26	26	hypothetical protein PRUPE_ppa013160mg [Prunus persica]	-	-	-	-
	novel-m0059-3p	Unigene0067518	mog-4	3610	4.5	4	0.016	1	1	PREDICTED: pre-mRNA-splicing factor ATP-dependent RNA helicase DEAH1 [Vitis vinifera]	ko03040//Spliceosome//Transcription//Genetic Information Processing	-	-	-
	novel-m0059-3p	Unigene0039380	-	459	3.5	4	0.016	1	1	PREDICTED: myotubularin-related protein DDB_G0290005-like [Gossypium hirsutum]	-	-	-	-
	novel-m0059-3p	Unigene0026840	KRI1	1315	4	4	0.016	1	1	PREDICTED: protein KRI1 homolog [Nelumbo nucifera]	-	-	-	-
	novel-m0059-3p	Unigene0036495	MYB44	524	2.5	2	0.018	2	2	PREDICTED: transcription factor MYB44-like [Populus euphratica]	-	-	-	-
	novel-m0059-3p	Unigene0046826	-	38	4.5	4	0.016	1	1	--	-	-	-	-
	novel-m0059-3p	Unigene0000143	-	625	3.5	2	0.018	2	2	--	-	-	-	-
	novel-m0059-3p	Unigene0081247	-	534	4	4	0.016	1	1	hydrolase family protein [Populus trichocarpa]	-	-	-	-
	novel-m0059-3p	Unigene0045875	-	592	2.5	2	0.018	2	1	PREDICTED: heavy metal-associated isoprenylated plant protein 3-like [Nelumbo nucifera]	-	-	-	-
	novel-m0059-3p	Unigene0088290	ASIL2	224	4.5	4	0.016	1	1	PREDICTED: trihelix transcription factor ASIL1 [Amborella trichopoda]	-	-	-	-
	novel-m0059-3p	Unigene0089075	BKI1	280	4	2	0.018	3	3	PREDICTED: BRI1 kinase inhibitor 1-like [Phoenix dactylifera]	ko04075//Plant hormone signal transduction//Signal transduction//Environmental Information Processing	-	-	-
	novel-m0059-3p	Unigene0033362	At4g37250	145	4.5	4	0.016	1	1	PREDICTED: probable LRR receptor-like serine/threonine-protein kinase At4g37250 [Nelumbo nucifera]	-	-	-	-
	novel-m0059-3p	Unigene0083052	GIP	1607	4.5	2	0.018	3	3	Retrovirus-related Pol polyprotein from transposon TNT 1-94 [Cajanus cajan]	-	-	-	-
	novel-m0059-3p	Unigene0057180	PRPF39	1653	4	2	0.018	3	3	PREDICTED: pre-mRNA-processing factor 39 isoform X2 [Musa acuminata subsp. malaccensis] [Musa acuminata]	-	-	-	GO:0043170//macromolecule metabolic process;GO:0010467//gene expression;GO:0071704//organic substance metabolic process;GO:0044237//cellular metabolic process;GO:0006807//nitrogen compound metabolic process;GO:0090304//nucleic acid metabolic process;GO:0044238//primary metabolic process;GO:0006396//RNA processing;GO:0006725//cellular aromatic compound metabolic process;GO:0008152//metabolic proce…
	novel-m0059-3p	Unigene0014499	rhmA	74	4.5	3	0.036	2	1	PREDICTED: 2-keto-3-deoxy-L-rhamnonate aldolase [Ricinus communis]	-	-	GO:0003824//catalytic activity;GO:0016830//carbon-carbon lyase activity;GO:0016829//lyase activity;GO:0016832//aldehyde-lyase activity	-
	novel-m0059-3p	Unigene0055684	PI4KB1	2987	3.5	4	0.016	1	0.5	PREDICTED: LOW QUALITY PROTEIN: phosphatidylinositol 4-kinase beta 1 [Phoenix dactylifera]	-	-	GO:0016772//transferase activity, transferring phosphorus-containing groups;GO:0003824//catalytic activity;GO:0016740//transferase activity	GO:0009987//cellular process;GO:0006629//lipid metabolic process;GO:0044238//primary metabolic process;GO:0019637//organophosphate metabolic process;GO:0046488//phosphatidylinositol metabolic process;GO:0006796//phosphate-containing compound metabolic process;GO:0044763//single-organism cellular process;GO:0008152//metabolic process;GO:0006644//phospholipid metabolic process;GO:0006793//phosphoru…
	novel-m0059-3p	Unigene0008618	CNX1	1348	4.5	2	0.018	4	4	PREDICTED: calnexin homolog [Nelumbo nucifera]	ko04141//Protein processing in endoplasmic reticulum//Folding, sorting and degradation//Genetic Information Processing;ko04145//Phagosome//Transport and catabolism//Cellular Processes	GO:0043226//organelle;GO:0044464//cell part;GO:0043231//intracellular membrane-bounded organelle;GO:0005623//cell;GO:0043227//membrane-bounded organelle;GO:0043229//intracellular organelle;GO:0044424//intracellular part;GO:0005622//intracellular	GO:0005488//binding;GO:0005515//protein binding	GO:0009987//cellular process;GO:0044237//cellular metabolic process;GO:0044260//cellular macromolecule metabolic process;GO:0044238//primary metabolic process;GO:0019538//protein metabolic process;GO:0008152//metabolic process;GO:0071704//organic substance metabolic process;GO:0043170//macromolecule metabolic process;GO:0044267//cellular protein metabolic process
	novel-m0059-3p	Unigene0038803	NET3C	359	4.5	4	0.016	1	1	PREDICTED: protein NETWORKED 3C [Nelumbo nucifera]	-	-	-	-
	novel-m0059-3p	Unigene0005940	PIP5K1	77	4.5	2	0.018	2	2	Histone H3 K4-specific methyltransferase SET7/9 family protein [Theobroma cacao]	-	-	-	-
	novel-m0059-3p	Unigene0029967	LEA14-A	876	4	3	0.036	3	1	late embryogenesis abundant protein [Tamarix hispida]	-	GO:0043231//intracellular membrane-bounded organelle;GO:0044444//cytoplasmic part;GO:0005623//cell;GO:0005622//intracellular;GO:0030054//cell junction;GO:0043226//organelle;GO:0005911//cell-cell junction;GO:0005737//cytoplasm;GO:0016020//membrane;GO:0044424//intracellular part;GO:0043227//membrane-bounded organelle;GO:0043229//intracellular organelle;GO:0044464//cell part	-	GO:0051234//establishment of localization;GO:1901576//organic substance biosynthetic process;GO:0006807//nitrogen compound metabolic process;GO:0001101//response to acid chemical;GO:0005975//carbohydrate metabolic process;GO:0006810//transport;GO:0019752//carboxylic acid metabolic process;GO:0006970//response to osmotic stress;GO:0009058//biosynthetic process;GO:0044237//cellular metabolic proces…
	novel-m0059-3p	Unigene0094042	-	785	4.5	2	0.018	5	5	Aggrecan core protein [Anthurium amnicola]	-	-	-	-
	novel-m0059-3p	Unigene0079464	-	68	4	2	0.018	2	2	--	-	-	-	-
	novel-m0059-3p	Unigene0083546	At5g38730	1656	4	4	0.016	1	1	PREDICTED: pentatricopeptide repeat-containing protein At5g38730 [Phoenix dactylifera]	-	-	-	-
	novel-m0059-3p	Unigene0047840	-	1222	3.5	4	0.016	1	1	PREDICTED: myosin-9 isoform X1 [Nelumbo nucifera]	-	-	-	-
	novel-m0059-3p	Unigene0078151	-	577	4	4	0.016	1	1	--	-	-	-	-
	novel-m0059-3p	Unigene0024442	UGT92A1	333	4	4	0.016	1	1	PREDICTED: UDP-glycosyltransferase 92A1-like [Nelumbo nucifera]	-	-	GO:0003824//catalytic activity;GO:0016740//transferase activity;GO:0016757//transferase activity, transferring glycosyl groups	-
	novel-m0059-3p	Unigene0068905	UBA2	446	3.5	2	0.018	2	2	PREDICTED: ubiquitin-activating enzyme E1 1-like [Phoenix dactylifera]	ko04120//Ubiquitin mediated proteolysis//Folding, sorting and degradation//Genetic Information Processing	-	-	-
	novel-m0059-3p	Unigene0050063	Dnajb2	902	4.5	2	0.018	2	2	DnaJ domain-containing protein [Cephalotus follicularis]	-	-	-	-
	novel-m0059-3p	Unigene0014498	rhmA	74	4.5	3	0.036	2	1	PREDICTED: 2-keto-3-deoxy-L-rhamnonate aldolase [Ricinus communis]	-	-	GO:0003824//catalytic activity;GO:0016829//lyase activity;GO:0016832//aldehyde-lyase activity;GO:0016830//carbon-carbon lyase activity	-
	novel-m0059-3p	Unigene0010264	rpsI	745	4.5	4	0.016	1	1	PREDICTED: 37S ribosomal protein S9, mitochondrial [Nelumbo nucifera]	ko03010//Ribosome//Translation//Genetic Information Processing	GO:0032991//macromolecular complex;GO:0005622//intracellular;GO:0030529//intracellular ribonucleoprotein complex;GO:0044424//intracellular part;GO:0005623//cell;GO:1990904//ribonucleoprotein complex;GO:0044464//cell part	-	GO:0008152//metabolic process;GO:0010467//gene expression;GO:0043170//macromolecule metabolic process;GO:0071704//organic substance metabolic process
	novel-m0059-3p	Unigene0055337	-	698	4.5	4	0.016	1	1	--	-	-	-	-
	novel-m0059-3p	Unigene0024781	At2g29290	1020	4	2	0.018	19	9.5	PREDICTED: tropinone reductase homolog At1g07440-like isoform X2 [Juglans regia]	ko01100//Metabolic pathways//Global and Overview//Metabolism;ko01110//Biosynthesis of secondary metabolites//Global and Overview//Metabolism;ko00960//Tropane, piperidine and pyridine alkaloid biosynthesis//Biosynthesis of other secondary metabolites//Metabolism	-	GO:0003824//catalytic activity	-
	novel-m0059-3p	Unigene0059576	yjcL	458	4	4	0.016	1	1	PREDICTED: uncharacterized membrane protein YjcL [Phoenix dactylifera]	-	-	-	-
	novel-m0059-3p	Unigene0027673	At5g55840	2397	4.5	4	0.016	1	0.5	PPR domain-containing protein/PPR_1 domain-containing protein/PPR_2 domain-containing protein [Cephalotus follicularis]	-	-	-	-
	novel-m0059-3p	Unigene0036057	DOT4	223	4.5	4	0.016	1	1	PREDICTED: pentatricopeptide repeat-containing protein At2g13600 [Amborella trichopoda]	-	-	-	-
	novel-m0059-3p	Unigene0003597	-	101	4.5	4	0.016	1	1	--	-	-	-	-
	novel-m0059-3p	Unigene0033676	RH10	199	4.5	2	0.018	2	1	PREDICTED: DEAD-box ATP-dependent RNA helicase 10 [Cucumis melo]	-	-	-	-
	novel-m0059-3p	Unigene0071654	CUT1	450	4	2	0.018	2	2	Very-long-chain 3-ketoacyl-CoA synthase [Corchorus capsularis]	ko01110//Biosynthesis of secondary metabolites//Global and Overview//Metabolism;ko00062//Fatty acid elongation//Lipid metabolism//Metabolism	-	GO:0016746//transferase activity, transferring acyl groups;GO:0003824//catalytic activity;GO:0016740//transferase activity	GO:0006631//fatty acid metabolic process;GO:0043436//oxoacid metabolic process;GO:0044281//small molecule metabolic process;GO:0006082//organic acid metabolic process;GO:0008152//metabolic process;GO:0019752//carboxylic acid metabolic process;GO:0044710//single-organism metabolic process;GO:0044237//cellular metabolic process;GO:0071704//organic substance metabolic process;GO:0009987//cellular pr…
	novel-m0059-3p	Unigene0083585	-	85	4.5	4	0.016	1	1	--	-	-	-	-
	novel-m0059-3p	Unigene0061643	-	50	4	4	0.016	1	1	--	-	-	-	-
	novel-m0059-3p	Unigene0076552	-	741	4	4	0.016	1	1	--	-	-	-	-
	novel-m0059-3p	Unigene0024459	DAGLB	2467	4.5	2	0.018	4	4	Sn1-specific diacylglycerol lipase beta [Morus notabilis]	-	-	-	-
	novel-m0059-3p	Unigene0034659	-	102	4	4	0.016	1	1	--	-	-	-	-
	novel-m0059-3p	Unigene0058711	HSP70	779	3	2	0.018	6	6	PREDICTED: stromal 70 kDa heat shock-related protein, chloroplastic [Vitis vinifera]	-	-	GO:0016627//oxidoreductase activity, acting on the CH-CH group of donors;GO:0036094//small molecule binding;GO:0001883//purine nucleoside binding;GO:0016491//oxidoreductase activity;GO:0097367//carbohydrate derivative binding;GO:0005515//protein binding;GO:0001882//nucleoside binding;GO:0032549//ribonucleoside binding;GO:0005488//binding;GO:0032550//purine ribonucleoside binding;GO:0003824//catal…	GO:0019538//protein metabolic process;GO:0044699//single-organism process;GO:0008152//metabolic process;GO:0044237//cellular metabolic process;GO:0044710//single-organism metabolic process;GO:0044267//cellular protein metabolic process;GO:0044260//cellular macromolecule metabolic process;GO:0044238//primary metabolic process;GO:0071704//organic substance metabolic process;GO:0043170//macromolecul…
	novel-m0059-3p	Unigene0061058	RF2b	2124	4.5	2	0.018	4	4	PREDICTED: probable serine/threonine-protein kinase mps1 [Nelumbo nucifera]	-	-	-	-
	novel-m0059-3p	Unigene0019565	RANGAP1	1770	4.5	2	0.018	3	1.5	RAN GTPase-activating protein 1 [Anthurium amnicola]	ko03013//RNA transport//Translation//Genetic Information Processing	-	-	-
	novel-m0059-3p	Unigene0113927	-	310	4	2	0.018	2	2	PREDICTED: zinc-regulated protein 8-like [Gossypium raimondii]	-	-	-	-
	novel-m0059-3p	Unigene0032576	Syncrip	1412	4	2	0.018	6	6	PREDICTED: heterogeneous nuclear ribonucleoprotein R [Nelumbo nucifera]	-	-	GO:0097159//organic cyclic compound binding;GO:0005488//binding	-
	novel-m0059-3p	Unigene0072798	-	953	4	4	0.016	1	1	--	-	-	-	-
	novel-m0059-3p	Unigene0024304	EMB1025	317	3.5	4	0.016	1	0.5	PREDICTED: pentatricopeptide repeat-containing protein At4g11690-like [Vitis vinifera]	-	-	-	-
	novel-m0059-3p	Unigene0111737	YMR099C	387	3.5	3	0.036	2	2	Galactose mutarotase-like superfamily protein isoform 1 [Theobroma cacao]	ko01100//Metabolic pathways//Global and Overview//Metabolism;ko01110//Biosynthesis of secondary metabolites//Global and Overview//Metabolism;ko01130//Biosynthesis of antibiotics//Global and Overview//Metabolism;ko01120//Microbial metabolism in diverse environments//Global and Overview//Metabolism;ko00010//Glycolysis / Gluconeogenesis//Carbohydrate metabolism//Metabolism	-	GO:0005488//binding;GO:0003824//catalytic activity	GO:0044238//primary metabolic process;GO:0008152//metabolic process
	novel-m0059-3p	Unigene0070116	TBL2	23	4.5	4	0.016	1	1	PREDICTED: transducin beta-like protein 2 [Nelumbo nucifera]	-	-	-	-
	novel-m0059-3p	Unigene0063149	CLASRP	718	3	2	0.018	3	3	PREDICTED: CLK4-associating serine/arginine rich protein isoform X5 [Phoenix dactylifera]	-	-	-	-
	novel-m0059-3p	Unigene0101961	-	217	4.5	4	0.016	1	1	PREDICTED: procyclic form-specific polypeptide B1-alpha [Vitis vinifera]	-	-	-	-
	novel-m0059-3p	Unigene0064613	Cdc40	1536	4.5	2	0.018	3	3	PREDICTED: pre-mRNA-processing factor 17 isoform X1 [Nelumbo nucifera]	ko03040//Spliceosome//Transcription//Genetic Information Processing	-	-	-
	novel-m0059-3p	Unigene0001247	At3g50690	630	4.5	2	0.018	5	5	Acidic leucine-rich nuclear phosphoprotein 32-related protein [Anthurium amnicola]	-	-	-	-
	novel-m0059-3p	Unigene0064955	Tnpo3	1946	4.5	4	0.016	1	1	PREDICTED: transportin MOS14 isoform X4 [Nelumbo nucifera]	-	GO:0044464//cell part;GO:0043226//organelle;GO:0043227//membrane-bounded organelle;GO:0043229//intracellular organelle;GO:0005622//intracellular;GO:0044424//intracellular part;GO:0005623//cell;GO:0043231//intracellular membrane-bounded organelle	GO:0031267//small GTPase binding;GO:0017016//Ras GTPase binding;GO:0051020//GTPase binding;GO:0005515//protein binding;GO:0005488//binding;GO:0019899//enzyme binding	GO:0006810//transport;GO:0071702//organic substance transport;GO:0051179//localization;GO:0015031//protein transport;GO:0008104//protein localization;GO:0051234//establishment of localization;GO:0033036//macromolecule localization;GO:0045184//establishment of protein localization
	novel-m0059-3p	Unigene0006865	GIP	1513	4.5	2	0.018	2	2	integrase core domain containing protein [Phaseolus vulgaris]	-	-	-	-
	novel-m0059-3p	Unigene0062517	AGAL1	46	3.5	4	0.016	1	0.5	alpha-galactosidase [Chimonanthus praecox]	ko00561//Glycerolipid metabolism//Lipid metabolism//Metabolism;ko00052//Galactose metabolism//Carbohydrate metabolism//Metabolism;ko00600//Sphingolipid metabolism//Lipid metabolism//Metabolism;ko00603//Glycosphingolipid biosynthesis - globo series//Glycan biosynthesis and metabolism//Metabolism	-	-	-
	novel-m0059-3p	Unigene0062276	NFYA8	509	3.5	4	0.016	1	0.333333	PREDICTED: nuclear transcription factor Y subunit A-3-like isoform X1 [Nelumbo nucifera]	-	-	-	-
	novel-m0059-3p	Unigene0005646	tlp	110	4.5	4	0.016	1	1	Osmotin 34 [Theobroma cacao]	-	-	-	-
	novel-m0059-3p	Unigene0001247	At3g50690	796	4.5	2	0.018	3	3	Acidic leucine-rich nuclear phosphoprotein 32-related protein [Anthurium amnicola]	-	-	-	-
	novel-m0059-3p	Unigene0058711	HSP70	2020	4.5	4	0.016	1	1	PREDICTED: stromal 70 kDa heat shock-related protein, chloroplastic [Vitis vinifera]	-	-	GO:0016627//oxidoreductase activity, acting on the CH-CH group of donors;GO:0036094//small molecule binding;GO:0001883//purine nucleoside binding;GO:0016491//oxidoreductase activity;GO:0097367//carbohydrate derivative binding;GO:0005515//protein binding;GO:0001882//nucleoside binding;GO:0032549//ribonucleoside binding;GO:0005488//binding;GO:0032550//purine ribonucleoside binding;GO:0003824//catal…	GO:0019538//protein metabolic process;GO:0044699//single-organism process;GO:0008152//metabolic process;GO:0044237//cellular metabolic process;GO:0044710//single-organism metabolic process;GO:0044267//cellular protein metabolic process;GO:0044260//cellular macromolecule metabolic process;GO:0044238//primary metabolic process;GO:0071704//organic substance metabolic process;GO:0043170//macromolecul…
	novel-m0059-3p	Unigene0069387	BHLH133	270	4.5	2	0.018	3	3	PREDICTED: transcription factor bHLH68-like [Nelumbo nucifera]	-	-	-	-
	novel-m0059-3p	Unigene0041211	-	490	4	4	0.016	1	1	--	-	-	-	-
	novel-m0059-3p	Unigene0020633	SCPL50	530	4.5	2	0.018	2	2	PREDICTED: serine carboxypeptidase-like 50 [Nelumbo nucifera]	-	-	GO:0008233//peptidase activity;GO:0070011//peptidase activity, acting on L-amino acid peptides;GO:0004180//carboxypeptidase activity;GO:0016787//hydrolase activity;GO:0008238//exopeptidase activity;GO:0003824//catalytic activity	GO:0071704//organic substance metabolic process;GO:0044238//primary metabolic process;GO:0008152//metabolic process;GO:0043170//macromolecule metabolic process;GO:0019538//protein metabolic process
	novel-m0059-3p	Unigene0027671	At5g55840	2629	4.5	4	0.016	1	0.5	PPR domain-containing protein/PPR_1 domain-containing protein/PPR_2 domain-containing protein [Cephalotus follicularis]	-	-	-	-
	novel-m0059-3p	Unigene0099931	LECRKS1	224	4.5	4	0.016	1	1	PREDICTED: L-type lectin-domain containing receptor kinase S.1 [Juglans regia]	-	GO:0005622//intracellular;GO:0043227//membrane-bounded organelle;GO:0044424//intracellular part;GO:0043229//intracellular organelle;GO:0044425//membrane part;GO:0016020//membrane;GO:0044464//cell part;GO:0031224//intrinsic component of membrane;GO:0005623//cell;GO:0043226//organelle;GO:0043231//intracellular membrane-bounded organelle	GO:1901363//heterocyclic compound binding;GO:0032550//purine ribonucleoside binding;GO:0032549//ribonucleoside binding;GO:0001882//nucleoside binding;GO:0097159//organic cyclic compound binding;GO:0016301//kinase activity;GO:0016772//transferase activity, transferring phosphorus-containing groups;GO:0004672//protein kinase activity;GO:0036094//small molecule binding;GO:0016773//phosphotransferase…	GO:0006464//cellular protein modification process;GO:0071704//organic substance metabolic process;GO:0043170//macromolecule metabolic process;GO:0044260//cellular macromolecule metabolic process;GO:0044238//primary metabolic process;GO:0043412//macromolecule modification;GO:0019538//protein metabolic process;GO:0006796//phosphate-containing compound metabolic process;GO:0044267//cellular protein …
	novel-m0059-3p	Unigene0009561	At2g43200	18	4.5	4	0.016	1	1	PREDICTED: probable methyltransferase PMT19 isoform X1 [Nelumbo nucifera]	-	GO:0043227//membrane-bounded organelle;GO:0031090//organelle membrane;GO:0043226//organelle;GO:0031224//intrinsic component of membrane;GO:0044425//membrane part;GO:0044422//organelle part;GO:0016020//membrane	GO:0016740//transferase activity;GO:0003824//catalytic activity;GO:0016741//transferase activity, transferring one-carbon groups	GO:0008152//metabolic process
	novel-m0059-3p	Unigene0008518	EGY3	157	4.5	4	0.016	1	1	PREDICTED: probable zinc metallopeptidase EGY3, chloroplastic isoform X1 [Juglans regia]	-	-	GO:0003824//catalytic activity;GO:0016787//hydrolase activity	-
	novel-m0059-3p	Unigene0086995	-	87	4.5	2	0.018	5	2.5	--	-	-	-	-
	novel-m0059-3p	Unigene0015365	-	259	4.5	4	0.016	1	1	--	-	-	-	-
	novel-m0059-3p	Unigene0038657	At3g46870	49	4	4	0.016	1	1	Pentatricopeptide repeat-containing protein At3g46870, partial [Anthurium amnicola]	-	-	-	-
	novel-m0059-3p	Unigene0068378	CESA3	3691	4.5	2	0.018	3	3	PREDICTED: probable cellulose synthase A catalytic subunit 3 [UDP-forming] isoform X1 [Nelumbo nucifera]	-	-	-	-
	novel-m0059-3p	Unigene0062616	DRB4	90	3.5	2	0.018	2	1	PREDICTED: double-stranded RNA-binding protein 4 isoform X3 [Vitis vinifera]	-	-	-	-
	novel-m0059-3p	Unigene0081621	At1g65660	401	4.5	2	0.018	3	3	pre-mRNA-splicing factor SLU7 [Ananas comosus]	ko03040//Spliceosome//Transcription//Genetic Information Processing	-	-	-
	novel-m0059-3p	Unigene0075506	KCA2	410	4.5	2	0.018	3	3	PREDICTED: kinesin-like protein KIN-14B isoform X1 [Nelumbo nucifera]	-	GO:0005856//cytoskeleton;GO:0043226//organelle;GO:0043228//non-membrane-bounded organelle;GO:0005875//microtubule associated complex;GO:0043234//protein complex;GO:0032991//macromolecular complex;GO:0044430//cytoskeletal part;GO:0005623//cell;GO:0044424//intracellular part;GO:0005622//intracellular;GO:0043229//intracellular organelle;GO:0044464//cell part;GO:0044446//intracellular organelle part;…	GO:1901363//heterocyclic compound binding;GO:0036094//small molecule binding;GO:0097367//carbohydrate derivative binding;GO:0003824//catalytic activity;GO:0097159//organic cyclic compound binding;GO:0005515//protein binding;GO:0003774//motor activity;GO:0001883//purine nucleoside binding;GO:0016817//hydrolase activity, acting on acid anhydrides;GO:0016787//hydrolase activity;GO:0001882//nucleosid…	GO:0019750//chloroplast localization;GO:0051667//establishment of plastid localization;GO:0006996//organelle organization;GO:0051649//establishment of localization in cell;GO:0044763//single-organism cellular process;GO:0009658//chloroplast organization;GO:0009987//cellular process;GO:0051179//localization;GO:0009657//plastid organization;GO:0051641//cellular localization;GO:0051640//organelle lo…
	novel-m0059-3p	Unigene0061280	ARF3	175	4.5	2	0.018	2	2	PREDICTED: auxin response factor 15-like isoform X4 [Phoenix dactylifera]	ko04075//Plant hormone signal transduction//Signal transduction//Environmental Information Processing	-	-	GO:0065007//biological regulation;GO:0044237//cellular metabolic process;GO:0007275//multicellular organism development;GO:0008152//metabolic process;GO:0010033//response to organic substance;GO:0009987//cellular process;GO:0042221//response to chemical;GO:0032502//developmental process;GO:0044767//single-organism developmental process;GO:0009791//post-embryonic development;GO:0050789//regulation…
	novel-m0059-3p	Unigene0070213	-	168	4.5	4	0.016	1	1	--	-	-	-	-
	novel-m0059-3p	Unigene0036157	-	874	4.5	2	0.018	6	6	titin homolog [Asparagus officinalis]	-	-	-	-
	novel-m0059-3p	Unigene0039406	-	1050	4	4	0.016	1	1	--	-	-	-	-
	novel-m0059-3p	Unigene0024783	At2g29340	920	4	2	0.018	19	9.5	tropinone reductase homolog At5g06060-like isoform X3 [Asparagus officinalis]	ko01100//Metabolic pathways//Global and Overview//Metabolism;ko01110//Biosynthesis of secondary metabolites//Global and Overview//Metabolism;ko00960//Tropane, piperidine and pyridine alkaloid biosynthesis//Biosynthesis of other secondary metabolites//Metabolism	-	-	-
	novel-m0059-3p	Unigene0084570	HCS2	2356	3	4	0.016	1	0.5	PREDICTED: biotin--protein ligase 2 isoform X1 [Musa acuminata subsp. malaccensis] [Musa acuminata]	ko01100//Metabolic pathways//Global and Overview//Metabolism;ko00780//Biotin metabolism//Metabolism of cofactors and vitamins//Metabolism	-	-	GO:0036211//protein modification process;GO:0019538//protein metabolic process;GO:0043412//macromolecule modification;GO:0008152//metabolic process;GO:0043170//macromolecule metabolic process;GO:0044238//primary metabolic process;GO:0071704//organic substance metabolic process
	novel-m0059-3p	Unigene0066855	RPS1	37	3.5	2	0.018	4	2	PREDICTED: 30S ribosomal protein S1, chloroplastic [Nelumbo nucifera]	ko03010//Ribosome//Translation//Genetic Information Processing	GO:0044464//cell part;GO:0044424//intracellular part;GO:1990904//ribonucleoprotein complex;GO:0005623//cell;GO:0030529//intracellular ribonucleoprotein complex;GO:0005622//intracellular;GO:0032991//macromolecular complex	-	-
	novel-m0059-3p	Unigene0089272	BKI1	505	4.5	4	0.016	1	1	PREDICTED: BRI1 kinase inhibitor 1-like [Nelumbo nucifera]	ko04075//Plant hormone signal transduction//Signal transduction//Environmental Information Processing	-	-	-
	novel-m0059-3p	Unigene0102089	DJ1B	1322	4.5	2	0.018	3	3	PREDICTED: protein DJ-1 homolog B-like [Jatropha curcas]	-	-	GO:0003824//catalytic activity	-
	novel-m0059-3p	Unigene0084287	-	157	4.5	4	0.016	1	1	--	-	-	-	-
	novel-m0059-3p	Unigene0057985	CIPK24	193	4.5	2	0.018	3	3	PREDICTED: CBL-interacting serine/threonine-protein kinase 24 [Nelumbo nucifera]	-	GO:0043227//membrane-bounded organelle;GO:0016020//membrane;GO:0044424//intracellular part;GO:0044446//intracellular organelle part;GO:0044444//cytoplasmic part;GO:0098588//bounding membrane of organelle;GO:0005622//intracellular;GO:0044464//cell part;GO:0031090//organelle membrane;GO:0005623//cell;GO:0043229//intracellular organelle;GO:0043231//intracellular membrane-bounded organelle;GO:0005774…	GO:0001883//purine nucleoside binding;GO:0036094//small molecule binding;GO:0016301//kinase activity;GO:0016772//transferase activity, transferring phosphorus-containing groups;GO:0005515//protein binding;GO:0003824//catalytic activity;GO:0001882//nucleoside binding;GO:0097367//carbohydrate derivative binding;GO:0032550//purine ribonucleoside binding;GO:1901363//heterocyclic compound binding;GO:0…	GO:0019538//protein metabolic process;GO:0044267//cellular protein metabolic process;GO:0009628//response to abiotic stimulus;GO:0050896//response to stimulus;GO:0050789//regulation of biological process;GO:0006464//cellular protein modification process;GO:0044237//cellular metabolic process;GO:0043412//macromolecule modification;GO:0050794//regulation of cellular process;GO:0071704//organic subs…
	novel-m0059-3p	Unigene0009737	COL5	885	4.5	2	0.018	3	3	PREDICTED: zinc finger protein CONSTANS-LIKE 5-like [Nelumbo nucifera]	-	-	-	-
	novel-m0059-3p	Unigene0056496	PHT4;7	3880	3	4	0.016	1	1	Protein EFR3 B [Anthurium amnicola]	-	-	-	-
	novel-m0059-3p	Unigene0033201	UGT78D2	231	4	2	0.018	3	3	UDP-glucosyl transferase 78D2 [Arabidopsis thaliana]	ko01100//Metabolic pathways//Global and Overview//Metabolism;ko01110//Biosynthesis of secondary metabolites//Global and Overview//Metabolism;ko00942//Anthocyanin biosynthesis//Biosynthesis of other secondary metabolites//Metabolism	-	GO:0016740//transferase activity;GO:0046527//glucosyltransferase activity;GO:0035251//UDP-glucosyltransferase activity;GO:0016758//transferase activity, transferring hexosyl groups;GO:0003824//catalytic activity;GO:0008194//UDP-glycosyltransferase activity;GO:0016757//transferase activity, transferring glycosyl groups	GO:0071704//organic substance metabolic process;GO:0009314//response to radiation;GO:0009628//response to abiotic stimulus;GO:0009058//biosynthetic process;GO:0050896//response to stimulus;GO:0009411//response to UV;GO:0009416//response to light stimulus;GO:0034285//response to disaccharide;GO:0042221//response to chemical;GO:1901576//organic substance biosynthetic process;GO:0010033//response to…
	novel-m0059-3p	Unigene0045874	-	529	4.5	2	0.018	2	1	PREDICTED: heavy metal-associated isoprenylated plant protein 3-like [Nelumbo nucifera]	-	-	-	-
	novel-m0059-3p	Unigene0072179	SQD2	302	4	2	0.018	3	3	PREDICTED: sulfoquinovosyl transferase SQD2 [Elaeis guineensis]	ko01100//Metabolic pathways//Global and Overview//Metabolism;ko00561//Glycerolipid metabolism//Lipid metabolism//Metabolism	GO:0043231//intracellular membrane-bounded organelle;GO:0043226//organelle;GO:0031967//organelle envelope;GO:0044435//plastid part;GO:0005737//cytoplasm;GO:0043229//intracellular organelle;GO:0031975//envelope;GO:0044444//cytoplasmic part;GO:0044422//organelle part;GO:0005623//cell;GO:0044464//cell part;GO:0009536//plastid;GO:0009526//plastid envelope;GO:0005622//intracellular;GO:0044424//intrace…	GO:0016740//transferase activity;GO:0003824//catalytic activity;GO:0016757//transferase activity, transferring glycosyl groups	GO:0031667//response to nutrient levels;GO:1901566//organonitrogen compound biosynthetic process;GO:0009987//cellular process;GO:0008152//metabolic process;GO:1901135//carbohydrate derivative metabolic process;GO:0006725//cellular aromatic compound metabolic process;GO:0046467//membrane lipid biosynthetic process;GO:0006807//nitrogen compound metabolic process;GO:0044238//primary metabolic proces…
	novel-m0059-3p	Unigene0069587	PDS5A	1750	4.5	4	0.016	1	1	PREDICTED: sister chromatid cohesion protein PDS5 homolog A isoform X3 [Nelumbo nucifera]	-	-	-	-
	novel-m0059-3p	Unigene0002437	-	75	4	4	0.016	1	1	--	-	-	-	-
	novel-m0059-3p	Unigene0053284	SMU2	341	2	2	0.018	3	3	PREDICTED: suppressor of mec-8 and unc-52 protein homolog 2 [Nelumbo nucifera]	-	-	-	GO:0044260//cellular macromolecule metabolic process;GO:0090304//nucleic acid metabolic process;GO:0009987//cellular process;GO:0008152//metabolic process;GO:1901360//organic cyclic compound metabolic process;GO:0010467//gene expression;GO:0044238//primary metabolic process;GO:0006139//nucleobase-containing compound metabolic process;GO:0046483//heterocycle metabolic process;GO:0044237//cellular …
[truncated: 857 more rows]
