# Supplementary material for: Small RNA and Degradome Sequencing in Floral Bud Reveal Roles of miRNAs in Dormancy Release of Chimonanthus praecox
Source: Int J Mol Sci. 2023 Feb 20;24(4):4210. doi: 10.3390/ijms24044210 (PMC9964840; doi:10.3390/ijms24044210)
Supplement: Supplementary file 1 [file ijms-24-04210-s001.zip › Table S12. GO enrichment analysis of DEMs target genes .xlsx]

## Sheet: miRNA-target pairs(955)
miRNA-target pairs of DEMs classified into Category 0, 1 and 2
miRNA	mRNA	symbol	cleave_site	score	Degr_Cp-categoty	Degr_Cp-pval	Degr_Cp-rawtags	Degr_Cp-normtags	Nr-annotation	biological-process	cellular-component	molecular-function
miR157-y	Unigene0038922	At4g12780	662	4.5	2	0.006	5	5	PREDICTED: auxilin-related protein 2-like [Brachypodium distachyon]	-	-	-
miR157-y	Unigene0052327	fusA2	240	4	2	0.006	2	2	PREDICTED: elongation factor G-2, chloroplastic-like [Phoenix dactylifera]	GO:0044464//cell part;GO:0005623//cell	GO:1901363//heterocyclic compound binding;GO:0005488//binding;GO:0001882//nucleoside binding;GO:0016787//hydrolase activity;GO:0032549//ribonucleoside binding;GO:0032550//purine ribonucleoside binding;GO:0003824//catalytic activity;GO:0036094//small molecule binding;GO:0016462//pyrophosphatase activity;GO:0008135//translation factor activity, RNA binding;GO:0097367//carbohydrate derivative bindin…	GO:1901576//organic substance biosynthetic process;GO:0009058//biosynthetic process;GO:0043170//macromolecule metabolic process;GO:0034645//cellular macromolecule biosynthetic process;GO:0071704//organic substance metabolic process;GO:0009987//cellular process;GO:0044260//cellular macromolecule metabolic process;GO:0044249//cellular biosynthetic process;GO:0009059//macromolecule biosynthetic proc…
miR157-y	Unigene0093250	emc2-a	138	4	2	0.006	3	3	PREDICTED: ER membrane protein complex subunit 2-A [Elaeis guineensis]	-	GO:0003824//catalytic activity	-
miR157-y	Unigene0036496	-	453	4.5	2	0.006	10	5	hypothetical protein L484_009299 [Morus notabilis]	-	-	-
miR157-y	Unigene0065088	EFL4	698	4.5	2	0.006	3	3	PREDICTED: protein ELF4-LIKE 4-like [Nelumbo nucifera]	-	-	-
miR157-y	Unigene0098421	CYCU4-1	478	4.5	2	0.006	3	3	PREDICTED: cyclin-U4-1-like [Nelumbo nucifera]	-	GO:0019900//kinase binding;GO:0016772//transferase activity, transferring phosphorus-containing groups;GO:0005515//protein binding;GO:0005488//binding;GO:0019899//enzyme binding;GO:0003824//catalytic activity;GO:0016740//transferase activity	GO:0006793//phosphorus metabolic process;GO:0006796//phosphate-containing compound metabolic process;GO:0009987//cellular process;GO:0008152//metabolic process;GO:0044237//cellular metabolic process
miR157-y	Unigene0049886	RNFT1	830	4	2	0.006	4	4	PREDICTED: RING finger and transmembrane domain-containing protein 2 [Nelumbo nucifera]	-	-	-
miR157-y	Unigene0055068	SPBC23E6.02	3079	4.5	0	0.02	56	28	PREDICTED: helicase-like transcription factor CHR28 [Vitis vinifera]	-	-	-
miR157-y	Unigene0043667	TIF3H1	682	4	2	0.006	6	6	PREDICTED: eukaryotic translation initiation factor 3 subunit H [Vitis vinifera]	GO:0005623//cell;GO:0043234//protein complex;GO:0005737//cytoplasm;GO:0044464//cell part;GO:0032991//macromolecular complex;GO:0030529//intracellular ribonucleoprotein complex;GO:0044424//intracellular part;GO:1990904//ribonucleoprotein complex;GO:0005622//intracellular;GO:0044444//cytoplasmic part;GO:0070993//translation preinitiation complex	-	GO:0050794//regulation of cellular process;GO:0036211//protein modification process;GO:0022607//cellular component assembly;GO:0080090//regulation of primary metabolic process;GO:0044237//cellular metabolic process;GO:0006417//regulation of translation;GO:0034622//cellular macromolecular complex assembly;GO:0050789//regulation of biological process;GO:0016043//cellular component organization;GO:0…
miR157-y	Unigene0011704	RH21	1578	4.5	2	0.006	2	2	PREDICTED: DEAD-box ATP-dependent RNA helicase 21 [Vitis vinifera]	-	-	-
miR157-y	Unigene0009151	TIC	383	4	2	0.006	11	11	PREDICTED: protein TIME FOR COFFEE-like isoform X2 [Nelumbo nucifera]	-	-	-
miR157-y	Unigene0043885	ADH	805	4	2	0.006	6	3	PREDICTED: alcohol dehydrogenase 1-like [Nelumbo nucifera]	-	GO:0003824//catalytic activity;GO:0043167//ion binding;GO:0043169//cation binding;GO:0005488//binding	GO:0008152//metabolic process;GO:0044699//single-organism process;GO:0044710//single-organism metabolic process
miR157-y	Unigene0036497	-	453	4.5	2	0.006	10	5	hypothetical protein L484_009299 [Morus notabilis]	-	-	-
miR157-y	Unigene0087158	At4g19185	976	4.5	2	0.006	2	2	PREDICTED: WAT1-related protein At4g19185 isoform X1 [Nelumbo nucifera]	GO:0031224//intrinsic component of membrane;GO:0044425//membrane part;GO:0016020//membrane	GO:0005215//transporter activity	GO:0044699//single-organism process;GO:0009987//cellular process;GO:0044763//single-organism cellular process
miR157-y	Unigene0024914	-	14	4	2	0.006	2	2	Apurinic endonuclease-redox protein [Anthurium amnicola]	-	-	-
miR157-y	Unigene0068225	-	576	4.5	2	0.006	4	1.33333	PREDICTED: uncharacterized protein LOC100266910 isoform X1 [Vitis vinifera]	-	-	-
miR157-y	Unigene0068226	-	576	4.5	2	0.006	4	1.33333	PREDICTED: uncharacterized protein LOC100266910 isoform X1 [Vitis vinifera]	-	-	-
miR157-y	Unigene0039560	RPB2	3660	4.5	2	0.006	7	3.5	PREDICTED: DNA-directed RNA polymerase II subunit RPB2 [Nelumbo nucifera]	GO:0044464//cell part;GO:0030054//cell junction;GO:0005634//nucleus;GO:0005911//cell-cell junction;GO:0044444//cytoplasmic part;GO:0044451//nucleoplasm part;GO:0043231//intracellular membrane-bounded organelle;GO:0044428//nuclear part;GO:0005622//intracellular;GO:0044422//organelle part;GO:0043233//organelle lumen;GO:0031981//nuclear lumen;GO:0070013//intracellular organelle lumen;GO:0005737//cyt…	GO:0097159//organic cyclic compound binding;GO:0005488//binding;GO:0034062//RNA polymerase activity;GO:0036094//small molecule binding;GO:1901363//heterocyclic compound binding;GO:0043167//ion binding;GO:0001882//nucleoside binding;GO:0003676//nucleic acid binding;GO:0003824//catalytic activity;GO:0043169//cation binding;GO:0016772//transferase activity, transferring phosphorus-containing groups;…	GO:1901360//organic cyclic compound metabolic process;GO:1901362//organic cyclic compound biosynthetic process;GO:0046700//heterocycle catabolic process;GO:0006725//cellular aromatic compound metabolic process;GO:0008152//metabolic process;GO:0034654//nucleobase-containing compound biosynthetic process;GO:0044249//cellular biosynthetic process;GO:0019439//aromatic compound catabolic process;GO:00…
miR157-y	Unigene0057961	-	739	4.5	2	0.006	3	3	DnaJ subfamily C member 22 [Theobroma cacao]	-	-	-
miR157-y	Unigene0043884	ADH	1256	4	2	0.006	6	3	PREDICTED: alcohol dehydrogenase 1-like [Nelumbo nucifera]	-	GO:0005488//binding;GO:0003824//catalytic activity;GO:0043167//ion binding;GO:0043169//cation binding	GO:0044710//single-organism metabolic process;GO:0044699//single-organism process;GO:0008152//metabolic process
miR157-y	Unigene0055959	ISPG	1561	4.5	2	0.006	10	10	PREDICTED: 4-hydroxy-3-methylbut-2-en-1-yl diphosphate synthase (ferredoxin), chloroplastic [Nelumbo nucifera]	GO:0005737//cytoplasm;GO:0044422//organelle part;GO:0044446//intracellular organelle part;GO:0009536//plastid;GO:0043227//membrane-bounded organelle;GO:0009532//plastid stroma;GO:0044464//cell part;GO:0005623//cell;GO:0009526//plastid envelope;GO:0044424//intracellular part;GO:0031967//organelle envelope;GO:0043226//organelle;GO:0044444//cytoplasmic part;GO:0043229//intracellular organelle;GO:000…	GO:0051536//iron-sulfur cluster binding;GO:0043169//cation binding;GO:0016725//oxidoreductase activity, acting on CH or CH2 groups;GO:0016491//oxidoreductase activity;GO:0043167//ion binding;GO:0052592//oxidoreductase activity, acting on CH or CH2 groups, with an iron-sulfur protein as acceptor;GO:0051540//metal cluster binding;GO:0003824//catalytic activity;GO:0005488//binding;GO:0046914//transi…	GO:2000112//regulation of cellular macromolecule biosynthetic process;GO:0002376//immune system process;GO:0044237//cellular metabolic process;GO:0009639//response to red or far red light;GO:0010468//regulation of gene expression;GO:0001101//response to acid chemical;GO:0006082//organic acid metabolic process;GO:0006996//organelle organization;GO:0016114//terpenoid biosynthetic process;GO:0006629…
miR157-y	Unigene0050961	PHL1	80	4.5	2	0.006	3	1.5	Myb_DNA-binding domain-containing protein/Myb_CC_LHEQLE domain-containing protein [Cephalotus follicularis]	-	-	-
miR157-y	Unigene0007647	PCKA	1974	3.5	2	0.006	3	3	PREDICTED: phosphoenolpyruvate carboxykinase [ATP]-like [Juglans regia]	-	-	-
miR157-y	Unigene0057796	STR6	1373	4.5	2	0.006	7	7	PREDICTED: rhodanese-like domain-containing protein 6 [Nelumbo nucifera]	-	-	-
miR157-y	Unigene0066407	-	2988	4.5	2	0.006	5	2.5	E3 ubiquitin-protein ligase bre1-like isoform X2 [Asparagus officinalis]	-	-	-
miR157-y	Unigene0069750	MPK10	2132	3.5	2	0.006	4	4	Mitogen-activated protein kinase 10 [Anthurium amnicola]	-	GO:0001883//purine nucleoside binding;GO:0016740//transferase activity;GO:0003824//catalytic activity;GO:1901363//heterocyclic compound binding;GO:0097367//carbohydrate derivative binding;GO:0032550//purine ribonucleoside binding;GO:0004871//signal transducer activity;GO:0016301//kinase activity;GO:0032549//ribonucleoside binding;GO:0004674//protein serine/threonine kinase activity;GO:0005057//re…	GO:0043170//macromolecule metabolic process;GO:0050793//regulation of developmental process;GO:0006796//phosphate-containing compound metabolic process;GO:0071840//cellular component organization or biogenesis;GO:0048509//regulation of meristem development;GO:0036211//protein modification process;GO:0050789//regulation of biological process;GO:0044085//cellular component biogenesis;GO:0051239//re…
miR157-y	Unigene0039985	At5g13110	770	4.5	2	0.006	2	1	PREDICTED: glucose-6-phosphate 1-dehydrogenase, chloroplastic [Elaeis guineensis]	-	GO:0003824//catalytic activity;GO:0005488//binding;GO:0097159//organic cyclic compound binding;GO:0000166//nucleotide binding;GO:1901363//heterocyclic compound binding;GO:0036094//small molecule binding;GO:1901265//nucleoside phosphate binding	GO:0071704//organic substance metabolic process;GO:0008152//metabolic process;GO:0044699//single-organism process;GO:0019318//hexose metabolic process;GO:0044710//single-organism metabolic process;GO:0044723//single-organism carbohydrate metabolic process;GO:0044281//small molecule metabolic process;GO:0005975//carbohydrate metabolic process;GO:0005996//monosaccharide metabolic process;GO:0044238…
miR157-y	Unigene0025760	Marf1	2676	4.5	2	0.006	2	2	PREDICTED: meiosis arrest female protein 1 homolog [Prunus mume]	-	-	-
miR157-y	Unigene0053647	IQD1	1061	3.5	2	0.006	2	2	PREDICTED: protein IQ-DOMAIN 1 isoform X1 [Nelumbo nucifera]	-	-	-
miR157-y	Unigene0001904	BLH2	1734	4	2	0.006	2	2	PREDICTED: BEL1-like homeodomain protein 4 [Nelumbo nucifera]	-	-	-
miR157-y	Unigene0083702	CCR1	525	4.5	2	0.006	8	8	Bifunctional dihydroflavonol 4-reductase/flavanone 4-reductase [Morus notabilis]	-	GO:0048037//cofactor binding;GO:0005488//binding	-
miR157-y	Unigene0066406	-	210	4.5	2	0.006	5	2.5	E3 ubiquitin-protein ligase bre1-like isoform X2 [Asparagus officinalis]	-	-	-
miR157-y	Unigene0039558	RPB2	1855	4.5	2	0.006	7	3.5	PREDICTED: DNA-directed RNA polymerase II subunit RPB2 [Nelumbo nucifera]	-	GO:0097159//organic cyclic compound binding;GO:1901363//heterocyclic compound binding;GO:0016779//nucleotidyltransferase activity;GO:0016740//transferase activity;GO:0097367//carbohydrate derivative binding;GO:0034062//RNA polymerase activity;GO:0016772//transferase activity, transferring phosphorus-containing groups;GO:0005488//binding;GO:0036094//small molecule binding;GO:0003824//catalytic act…	GO:0071704//organic substance metabolic process;GO:0044260//cellular macromolecule metabolic process;GO:0009987//cellular process;GO:0043170//macromolecule metabolic process;GO:0009059//macromolecule biosynthetic process;GO:0008152//metabolic process;GO:1901576//organic substance biosynthetic process;GO:0034645//cellular macromolecule biosynthetic process;GO:0044249//cellular biosynthetic process…
miR157-y	Unigene0075391	CER1	1976	4	2	0.006	18	18	PREDICTED: protein ECERIFERUM 1-like [Nelumbo nucifera]	-	-	-
miR157-y	Unigene0079231	MIRO1	2434	4.5	2	0.006	3	1.5	PREDICTED: mitochondrial Rho GTPase 1-like isoform X1 [Phoenix dactylifera]	-	-	-
miR157-y	Unigene0087918	-	233	4.5	2	0.006	2	2	--	-	-	-
miR157-y	Unigene0002645	SPBC23E6.02	736	4.5	0	0.02	56	28	PREDICTED: helicase-like transcription factor CHR28 [Juglans regia]	-	-	-
miR157-y	Unigene0066152	EMB1674	726	4.5	1	0	2	2	PREDICTED: protein EMBRYO DEFECTIVE 1674-like isoform X1 [Prunus mume]	-	-	-
miR157-y	Unigene0050959	PHL1	620	4.5	2	0.006	3	1.5	PREDICTED: myb family transcription factor PHL7 isoform X1 [Vitis vinifera]	-	-	GO:0043170//macromolecule metabolic process;GO:0051179//localization;GO:0051641//cellular localization;GO:0044249//cellular biosynthetic process;GO:0051234//establishment of localization;GO:0044763//single-organism cellular process;GO:0071704//organic substance metabolic process;GO:0009058//biosynthetic process;GO:0044699//single-organism process;GO:0034645//cellular macromolecule biosynthetic pr…
miR157-y	Unigene0042826	DCAF1	847	4	2	0.006	3	3	PREDICTED: DDB1- and CUL4-associated factor homolog 1 [Nelumbo nucifera]	-	-	-
miR157-y	Unigene0068229	-	576	4.5	2	0.006	4	1.33333	PREDICTED: uncharacterized protein LOC100266910 isoform X1 [Vitis vinifera]	-	-	-
miR157-y	Unigene0108202	-	2225	4.5	2	0.006	2	2	PREDICTED: arabinosyltransferase XEG113 isoform X1 [Nelumbo nucifera]	-	-	-
miR157-y	Unigene0076139	CER1	1606	4	2	0.006	3	3	protein ECERIFERUM 1-like [Ananas comosus]	GO:0016020//membrane;GO:0031224//intrinsic component of membrane;GO:0044425//membrane part	GO:0003824//catalytic activity	GO:0032787//monocarboxylic acid metabolic process;GO:0006631//fatty acid metabolic process;GO:0009987//cellular process;GO:0044710//single-organism metabolic process;GO:0008152//metabolic process;GO:0044255//cellular lipid metabolic process;GO:0044699//single-organism process;GO:0043436//oxoacid metabolic process;GO:0006629//lipid metabolic process;GO:0044238//primary metabolic process;GO:0044237…
miR157-y	Unigene0033858	WRKY11	165	4.5	2	0.006	2	2	PREDICTED: probable WRKY transcription factor 17 [Nelumbo nucifera]	-	GO:1901363//heterocyclic compound binding;GO:0003677//DNA binding;GO:0097159//organic cyclic compound binding;GO:0003676//nucleic acid binding;GO:0005488//binding	GO:0019222//regulation of metabolic process;GO:0065007//biological regulation;GO:0060255//regulation of macromolecule metabolic process;GO:0050789//regulation of biological process;GO:0010468//regulation of gene expression
miR157-y	Unigene0079229	MIRO1	1555	4.5	2	0.006	3	1.5	PREDICTED: mitochondrial Rho GTPase 1 [Phoenix dactylifera]	-	-	-
miR157-y	Unigene0010426	SUPT6H	1021	4.5	2	0.006	2	2	PREDICTED: transcription elongation factor SPT6 homolog [Nelumbo nucifera]	-	-	GO:0051252//regulation of RNA metabolic process;GO:0019219//regulation of nucleobase-containing compound metabolic process;GO:0031326//regulation of cellular biosynthetic process;GO:2001141//regulation of RNA biosynthetic process;GO:0019222//regulation of metabolic process;GO:0050794//regulation of cellular process;GO:0065007//biological regulation;GO:0009889//regulation of biosynthetic process;G…
miR157-y	Unigene0113338	CBSX3	371	4	2	0.006	26	26	PREDICTED: CBS domain-containing protein CBSX3, mitochondrial-like [Nelumbo nucifera]	-	GO:1901265//nucleoside phosphate binding;GO:0043167//ion binding;GO:0046872//metal ion binding;GO:0005488//binding;GO:0046914//transition metal ion binding;GO:0000166//nucleotide binding;GO:0097159//organic cyclic compound binding;GO:0036094//small molecule binding;GO:0017076//purine nucleotide binding;GO:0043169//cation binding;GO:1901363//heterocyclic compound binding	GO:0016043//cellular component organization;GO:0008152//metabolic process;GO:0009987//cellular process;GO:0006082//organic acid metabolic process;GO:0006950//response to stress;GO:0071704//organic substance metabolic process;GO:0051179//localization;GO:0006810//transport;GO:0019725//cellular homeostasis;GO:0006970//response to osmotic stress;GO:0044281//small molecule metabolic process;GO:0044237…
miR167-x	Unigene0082948	LIP5	1022	3	2	0.002	2	1	PREDICTED: protein HOMOLOG OF MAMMALIAN LYST-INTERACTING PROTEIN 5 [Elaeis guineensis]	-	-	-
miR167-x	Unigene0111776	Os08g0118900	601	4	2	0.002	5	5	PREDICTED: probable adenylate kinase 7, mitochondrial [Phoenix dactylifera]	-	-	-
miR167-x	Unigene0062071	PALD1	3501	4	2	0.002	2	2	PREDICTED: paladin isoform X2 [Nelumbo nucifera]	-	-	-
miR167-x	Unigene0076706	RHM1	1069	4.5	2	0.002	2	2	PREDICTED: trifunctional UDP-glucose 4,6-dehydratase/UDP-4-keto-6-deoxy-D-glucose 3,5-epimerase/UDP-4-keto-L-rhamnose-reductase RHM1 [Nelumbo nucifera]	-	GO:0016836//hydro-lyase activity;GO:0005488//binding;GO:0016829//lyase activity;GO:0003824//catalytic activity;GO:0048037//cofactor binding;GO:0016835//carbon-oxygen lyase activity	GO:0006139//nucleobase-containing compound metabolic process;GO:0006796//phosphate-containing compound metabolic process;GO:0009117//nucleotide metabolic process;GO:0019637//organophosphate metabolic process;GO:0044699//single-organism process;GO:0044710//single-organism metabolic process;GO:0006807//nitrogen compound metabolic process;GO:0044238//primary metabolic process;GO:0044237//cellular me…
miR167-x	Unigene0068581	At1g04910	2449	4.5	2	0.002	2	2	DUF246 domain-containing protein At1g04910 [Anthurium amnicola]	-	-	-
miR167-x	Unigene0071211	NPF8.3	965	4	2	0.002	8	8	PREDICTED: protein NRT1/ PTR FAMILY 8.3-like [Phoenix dactylifera]	GO:0016020//membrane;GO:0044425//membrane part;GO:0031224//intrinsic component of membrane	-	GO:0071705//nitrogen compound transport;GO:0042886//amide transport;GO:0071702//organic substance transport;GO:1902578//single-organism localization;GO:0044765//single-organism transport;GO:0051179//localization;GO:0015833//peptide transport;GO:0006810//transport;GO:0051234//establishment of localization;GO:0044699//single-organism process
miR167-x	Unigene0031702	-	869	4.5	2	0.002	3	3	Phox/Bem1p [Corchorus capsularis]	-	-	-
miR167-x	Unigene0054827	DDB_G0276461	1180	4.5	2	0.002	2	1	PREDICTED: probable serine/threonine-protein kinase DDB_G0280111 isoform X2 [Nelumbo nucifera]	-	-	-
miR167-x	Unigene0054828	AAK1	1180	4.5	2	0.002	2	1	PREDICTED: probable serine/threonine-protein kinase DDB_G0280111 isoform X2 [Nelumbo nucifera]	-	GO:0016772//transferase activity, transferring phosphorus-containing groups;GO:0003824//catalytic activity;GO:0016740//transferase activity	-
miR167-y	Unigene0037500	WRKY4	711	4.5	2	0.006	5	2.5	PREDICTED: probable WRKY transcription factor 4 isoform X1 [Phoenix dactylifera]	-	-	-
miR167-y	Unigene0051576	NFS2	218	3.5	2	0.006	2	1	PREDICTED: cysteine desulfurase 1, chloroplastic isoform X2 [Vigna angularis]	-	GO:0016829//lyase activity;GO:0003824//catalytic activity;GO:0016740//transferase activity;GO:0005488//binding;GO:0043167//ion binding;GO:0043168//anion binding;GO:0016782//transferase activity, transferring sulfur-containing groups;GO:0016783//sulfurtransferase activity;GO:0016846//carbon-sulfur lyase activity	GO:0043436//oxoacid metabolic process;GO:0006807//nitrogen compound metabolic process;GO:0044699//single-organism process;GO:0000096//sulfur amino acid metabolic process;GO:1901564//organonitrogen compound metabolic process;GO:0044237//cellular metabolic process;GO:0008152//metabolic process;GO:0019752//carboxylic acid metabolic process;GO:0044238//primary metabolic process;GO:0044763//single-org…
miR167-y	Unigene0008517	TIM44-2	1099	4	2	0	3	3	PREDICTED: mitochondrial import inner membrane translocase subunit TIM44-2 [Nelumbo nucifera]	-	-	-
miR167-y	Unigene0057083	SIR1	690	4	2	0.006	3	3	PREDICTED: sulfite reductase [ferredoxin], chloroplastic-like [Nelumbo nucifera]	-	GO:0016667//oxidoreductase activity, acting on a sulfur group of donors;GO:0016673//oxidoreductase activity, acting on a sulfur group of donors, iron-sulfur protein as acceptor;GO:1901363//heterocyclic compound binding;GO:0016491//oxidoreductase activity;GO:0005488//binding;GO:0051540//metal cluster binding;GO:0097159//organic cyclic compound binding;GO:0051536//iron-sulfur cluster binding;GO:000…	GO:0044710//single-organism metabolic process;GO:0044699//single-organism process;GO:0008152//metabolic process
miR167-y	Unigene0048660	OVA9	491	4.5	2	0.006	4	4	PREDICTED: glutamine--tRNA ligase [Nelumbo nucifera]	GO:0005623//cell;GO:0044424//intracellular part;GO:0005622//intracellular;GO:0044464//cell part	GO:0016874//ligase activity;GO:0004812//aminoacyl-tRNA ligase activity;GO:0016875//ligase activity, forming carbon-oxygen bonds;GO:0003824//catalytic activity;GO:0097367//carbohydrate derivative binding;GO:0097159//organic cyclic compound binding;GO:0032550//purine ribonucleoside binding;GO:0001883//purine nucleoside binding;GO:0005488//binding;GO:0016876//ligase activity, forming aminoacyl-tRNA …	GO:0019752//carboxylic acid metabolic process;GO:0043039//tRNA aminoacylation;GO:0044710//single-organism metabolic process;GO:0006518//peptide metabolic process;GO:0006399//tRNA metabolic process;GO:0006082//organic acid metabolic process;GO:0043038//amino acid activation;GO:0044238//primary metabolic process;GO:0009987//cellular process;GO:1901564//organonitrogen compound metabolic process;GO:0…
miR167-y	Unigene0086918	At5g01460	351	4	2	0.006	3	1.5	PREDICTED: LIMR family protein At5g01460 [Citrus sinensis]	GO:0016020//membrane;GO:0044425//membrane part;GO:0031224//intrinsic component of membrane	-	-
miR167-y	Unigene0027030	VPS13A	3116	4.5	2	0.006	3	3	PREDICTED: uncharacterized protein LOC105035160 isoform X1 [Elaeis guineensis]	-	-	-
miR167-y	Unigene0051575	NFS2	1165	3.5	2	0.006	2	1	PREDICTED: cysteine desulfurase 1, chloroplastic [Nelumbo nucifera]	GO:0009536//plastid;GO:0044444//cytoplasmic part;GO:0043227//membrane-bounded organelle;GO:0005623//cell;GO:0043231//intracellular membrane-bounded organelle;GO:0043226//organelle;GO:0005737//cytoplasm;GO:0005622//intracellular;GO:0043229//intracellular organelle;GO:0044424//intracellular part;GO:0044464//cell part	GO:0016783//sulfurtransferase activity;GO:0016829//lyase activity;GO:0016740//transferase activity;GO:0016846//carbon-sulfur lyase activity;GO:0043167//ion binding;GO:0016782//transferase activity, transferring sulfur-containing groups;GO:0005488//binding;GO:0043168//anion binding;GO:0003824//catalytic activity	GO:0006790//sulfur compound metabolic process;GO:0055080//cation homeostasis;GO:1901566//organonitrogen compound biosynthetic process;GO:0044699//single-organism process;GO:0006082//organic acid metabolic process;GO:0009058//biosynthetic process;GO:0000096//sulfur amino acid metabolic process;GO:0016043//cellular component organization;GO:1901576//organic substance biosynthetic process;GO:0044237…
miR167-y	Unigene0081395	At1g43190	1897	4	2	0.006	2	2	PREDICTED: polypyrimidine tract-binding protein homolog 3-like isoform X2 [Nelumbo nucifera]	-	-	-
miR167-y	Unigene0037499	WRKY4	247	4.5	2	0.006	5	2.5	PREDICTED: probable WRKY transcription factor 4 isoform X1 [Phoenix dactylifera]	-	-	-
miR167-y	Unigene0086914	At5g01460	351	4	2	0.006	3	1.5	PREDICTED: LIMR family protein At5g01460-like [Camelina sativa]	GO:0044425//membrane part;GO:0016020//membrane;GO:0031224//intrinsic component of membrane	-	-
miR2092-x	Unigene0032082	GA15091	561	4	2	0.01	7	7	PREDICTED: protein GDAP2 homolog [Phoenix dactylifera]	-	-	-
miR2092-x	Unigene0062176	XBAT33	1857	4.5	2	0.01	2	2	PREDICTED: E3 ubiquitin-protein ligase XBAT33 isoform X1 [Vitis vinifera]	-	GO:0043167//ion binding;GO:0005488//binding;GO:0003824//catalytic activity;GO:0019787//ubiquitin-like protein transferase activity;GO:0016740//transferase activity;GO:0043169//cation binding	GO:0036211//protein modification process;GO:0044267//cellular protein metabolic process;GO:0019538//protein metabolic process;GO:0032446//protein modification by small protein conjugation;GO:0044238//primary metabolic process;GO:0043170//macromolecule metabolic process;GO:0044237//cellular metabolic process;GO:0044260//cellular macromolecule metabolic process;GO:0006464//cellular protein modifica…
miR2092-x	Unigene0012924	AP2M	476	4.5	2	0.01	2	1	PREDICTED: AP-2 complex subunit mu [Amborella trichopoda]	GO:0044444//cytoplasmic part;GO:0005622//intracellular;GO:0030117//membrane coat;GO:0032991//macromolecular complex;GO:0005737//cytoplasm;GO:0005623//cell;GO:0016020//membrane;GO:0044424//intracellular part;GO:0043234//protein complex;GO:0044464//cell part;GO:0048475//coated membrane;GO:0044425//membrane part;GO:0098796//membrane protein complex;GO:0030119//AP-type membrane coat adaptor complex	GO:0005488//binding;GO:0043167//ion binding;GO:0043168//anion binding	GO:0006810//transport;GO:0008104//protein localization;GO:0008152//metabolic process;GO:0071702//organic substance transport;GO:0051179//localization;GO:0015031//protein transport;GO:0033036//macromolecule localization;GO:0051234//establishment of localization;GO:0045184//establishment of protein localization
miR2092-x	Unigene0059020	RPS15AA	188	4.5	2	0.01	35	17.5	PREDICTED: 40S ribosomal protein S15a-1 [Arachis duranensis]	-	-	-
miR2092-x	Unigene0061442	VTC5	1735	3.5	2	0.01	3	3	GDP-L-galactose phosphorylase [Actinidia eriantha]	-	GO:0016758//transferase activity, transferring hexosyl groups;GO:0016772//transferase activity, transferring phosphorus-containing groups;GO:0016757//transferase activity, transferring glycosyl groups;GO:0016740//transferase activity;GO:0003824//catalytic activity;GO:0004645//phosphorylase activity	-
miR2092-x	Unigene0024618	At2g44510	1755	4.5	2	0.01	3	1.5	PREDICTED: protein BCCIP homolog isoform X1 [Nelumbo nucifera]	-	-	-
miR2092-x	Unigene0112214	-	596	4.5	2	0.01	2	1	PREDICTED: translation initiation factor IF-2 isoform X1 [Cucumis melo]	-	-	-
miR2092-x	Unigene0048584	TPLATE	795	3.5	2	0.01	3	3	PREDICTED: protein TPLATE-like [Nelumbo nucifera]	GO:0005737//cytoplasm;GO:0005911//cell-cell junction;GO:0043228//non-membrane-bounded organelle;GO:0005622//intracellular;GO:0043229//intracellular organelle;GO:0044444//cytoplasmic part;GO:0044424//intracellular part;GO:0016020//membrane;GO:0043232//intracellular non-membrane-bounded organelle;GO:0044464//cell part;GO:0043226//organelle;GO:0030054//cell junction;GO:0005623//cell	-	GO:0030243//cellulose metabolic process;GO:0043170//macromolecule metabolic process;GO:0051179//localization;GO:0044042//glucan metabolic process;GO:0007275//multicellular organism development;GO:0071704//organic substance metabolic process;GO:0006073//cellular glucan metabolic process;GO:0006810//transport;GO:0044262//cellular carbohydrate metabolic process;GO:0044707//single-multicellular organ…
miR2092-x	Unigene0080841	EMS1	650	3.5	2	0.01	2	2	PREDICTED: phytosulfokine receptor 2-like [Nelumbo nucifera]	-	GO:0016772//transferase activity, transferring phosphorus-containing groups;GO:0003824//catalytic activity;GO:0004672//protein kinase activity;GO:0016301//kinase activity;GO:0016740//transferase activity;GO:0016773//phosphotransferase activity, alcohol group as acceptor	GO:0044267//cellular protein metabolic process;GO:0043170//macromolecule metabolic process;GO:0016310//phosphorylation;GO:0006464//cellular protein modification process;GO:0006796//phosphate-containing compound metabolic process;GO:0036211//protein modification process;GO:0044237//cellular metabolic process;GO:0044260//cellular macromolecule metabolic process;GO:0019538//protein metabolic process…
miR2092-x	Unigene0059076	-	1124	4	2	0.01	2	2	PREDICTED: probable DNA-directed RNA polymerase I subunit RPA43 isoform X1 [Phoenix dactylifera]	-	-	-
miR2092-x	Unigene0063780	SBT1.7	689	4	2	0.01	2	2	PREDICTED: subtilisin-like protease SBT1.7 [Jatropha curcas]	-	GO:0016787//hydrolase activity;GO:0003824//catalytic activity;GO:0070011//peptidase activity, acting on L-amino acid peptides;GO:0008233//peptidase activity	GO:0071704//organic substance metabolic process;GO:0019538//protein metabolic process;GO:0043170//macromolecule metabolic process;GO:0008152//metabolic process;GO:0044238//primary metabolic process
miR2092-x	Unigene0059379	DDB_G0274487	2123	4.5	2	0.01	2	1	Choline_transpo domain-containing protein [Cephalotus follicularis]	-	-	-
miR2092-x	Unigene0076440	NRPB6B	994	4.5	2	0.01	6	6	DNA-directed RNA polymerase [Zostera marina]	-	-	-
miR2092-x	Unigene0080655	-	509	4.5	2	0.01	3	3	--	-	-	-
miR2092-x	Unigene0012363	MUR1	246	4	2	0.01	2	2	PREDICTED: GDP-mannose 4,6 dehydratase 1 [Vitis vinifera]	-	GO:0048037//cofactor binding;GO:0016836//hydro-lyase activity;GO:0016829//lyase activity;GO:0016835//carbon-oxygen lyase activity;GO:0005488//binding;GO:0003824//catalytic activity	GO:0009225//nucleotide-sugar metabolic process;GO:0046483//heterocycle metabolic process;GO:0009987//cellular process;GO:0008152//metabolic process;GO:0006139//nucleobase-containing compound metabolic process;GO:0044237//cellular metabolic process;GO:0071704//organic substance metabolic process;GO:1901360//organic cyclic compound metabolic process;GO:0006725//cellular aromatic compound metabolic …
miR2092-x	Unigene0026961	CDC73	914	4	2	0.01	3	3	PREDICTED: protein CDC73 homolog [Nelumbo nucifera]	-	-	GO:0044707//single-multicellular organism process;GO:0048856//anatomical structure development;GO:0032502//developmental process;GO:0048731//system development;GO:0007275//multicellular organism development;GO:0000003//reproduction;GO:0044699//single-organism process;GO:0044767//single-organism developmental process;GO:0061458//reproductive system development;GO:0048608//reproductive structure de…
miR2092-x	Unigene0096216	LACS4	484	3.5	2	0.01	8	8	PREDICTED: long chain acyl-CoA synthetase 4-like isoform X2 [Nelumbo nucifera]	-	-	-
miR2092-x	Unigene0022520	FAM210B	148	4	2	0.01	9	9	Protein FAM210B, partial [Anthurium amnicola]	GO:0043227//membrane-bounded organelle;GO:0005737//cytoplasm;GO:0009507//chloroplast;GO:0043231//intracellular membrane-bounded organelle;GO:0044424//intracellular part;GO:0043229//intracellular organelle;GO:0044464//cell part;GO:0044444//cytoplasmic part;GO:0009536//plastid;GO:0043226//organelle;GO:0005623//cell;GO:0005622//intracellular	-	GO:0044767//single-organism developmental process;GO:0009987//cellular process;GO:0032502//developmental process;GO:0044699//single-organism process
miR2092-x	Unigene0060180	EPSIN1	173	3.5	2	0.01	2	2	PREDICTED: clathrin interactor EPSIN 1-like [Nelumbo nucifera]	GO:0005622//intracellular;GO:0043231//intracellular membrane-bounded organelle;GO:0043226//organelle;GO:0005623//cell;GO:0043229//intracellular organelle;GO:0031410//cytoplasmic vesicle;GO:0043228//non-membrane-bounded organelle;GO:0044464//cell part;GO:0043227//membrane-bounded organelle;GO:0044444//cytoplasmic part;GO:0031982//vesicle;GO:0005737//cytoplasm;GO:0043232//intracellular non-membrane…	-	GO:0008104//protein localization;GO:0033036//macromolecule localization;GO:0045184//establishment of protein localization;GO:0006886//intracellular protein transport;GO:0034613//cellular protein localization;GO:0070727//cellular macromolecule localization;GO:0051179//localization;GO:0006810//transport;GO:0051649//establishment of localization in cell;GO:0051641//cellular localization;GO:0071702//…
miR2092-x	Unigene0005674	SPBC1271.03c	1630	4.5	2	0.01	2	2	PREDICTED: MATH and LRR domain-containing protein PFE0570w-like [Ziziphus jujuba]	-	-	-
miR2092-x	Unigene0047291	efg1	385	4	2	0.01	2	1	PREDICTED: rRNA-processing protein EFG1 isoform X1 [Ricinus communis]	-	-	-
miR2092-x	Unigene0010404	B3GALT6	1363	4	2	0.01	2	2	PREDICTED: beta-1,6-galactosyltransferase GALT31A [Nelumbo nucifera]	GO:0031090//organelle membrane;GO:0044425//membrane part;GO:0016020//membrane;GO:0043226//organelle;GO:0044422//organelle part;GO:0031224//intrinsic component of membrane;GO:0043227//membrane-bounded organelle	GO:0016758//transferase activity, transferring hexosyl groups;GO:0003824//catalytic activity;GO:0008378//galactosyltransferase activity;GO:0016740//transferase activity;GO:0008194//UDP-glycosyltransferase activity;GO:0035250//UDP-galactosyltransferase activity;GO:0016757//transferase activity, transferring glycosyl groups	GO:0009890//negative regulation of biosynthetic process;GO:0050789//regulation of biological process;GO:0043412//macromolecule modification;GO:1903507//negative regulation of nucleic acid-templated transcription;GO:0009889//regulation of biosynthetic process;GO:0044710//single-organism metabolic process;GO:0006325//chromatin organization;GO:0048523//negative regulation of cellular process;GO:0044…
miR2092-x	Unigene0018466	-	289	3	0	0.002	41	41	PREDICTED: mediator of RNA polymerase II transcription subunit 1 [Vitis vinifera]	-	-	-
miR2092-x	Unigene0053933	-	384	4.5	2	0.01	3	3	PREDICTED: formin-1 isoform X1 [Sesamum indicum]	GO:0005623//cell;GO:0005622//intracellular;GO:0044464//cell part;GO:0044424//intracellular part	GO:0005488//binding	-
miR2092-x	Unigene0053063	At2g18620	396	4.5	2	0.01	10	10	chloroplast heterodimeric geranylgeranyl pyrophosphate synthase small subunit [Paeonia lactiflora]	-	-	-
miR2092-x	Unigene0099802	-	605	4.5	2	0.01	2	2	PREDICTED: uncharacterized protein LOC104601818 [Nelumbo nucifera]	-	-	-
miR2092-x	Unigene0076689	pteN	1249	4.5	2	0.01	3	3	PREDICTED: phosphatidylinositol 3,4,5-trisphosphate 3-phosphatase and protein-tyrosine-phosphatase PTEN2A-like [Nelumbo nucifera]	-	-	-
miR2092-x	Unigene0052620	G3bp1	2750	4.5	2	0.01	3	3	PREDICTED: ras GTPase-activating protein-binding protein 2 isoform X1 [Nelumbo nucifera]	-	-	-
miR2092-x	Unigene0011722	HIS2A	467	4.5	2	0.01	11	11	PREDICTED: histone H2AX [Theobroma cacao]	GO:0043231//intracellular membrane-bounded organelle;GO:0044464//cell part;GO:0005623//cell;GO:0043228//non-membrane-bounded organelle;GO:0043227//membrane-bounded organelle;GO:0044424//intracellular part;GO:0043232//intracellular non-membrane-bounded organelle;GO:0005622//intracellular;GO:0043226//organelle;GO:0043229//intracellular organelle	GO:1901363//heterocyclic compound binding;GO:0046983//protein dimerization activity;GO:0003676//nucleic acid binding;GO:0005488//binding;GO:0097159//organic cyclic compound binding;GO:0005515//protein binding	-
miR2092-x	Unigene0083869	INVB	1377	4.5	2	0.01	2	2	PREDICTED: probable alkaline/neutral invertase B isoform X1 [Nelumbo nucifera]	GO:0044464//cell part;GO:0044444//cytoplasmic part;GO:0005622//intracellular;GO:0005737//cytoplasm;GO:0005623//cell;GO:0044424//intracellular part	GO:0003824//catalytic activity;GO:0004553//hydrolase activity, hydrolyzing O-glycosyl compounds;GO:0016798//hydrolase activity, acting on glycosyl bonds;GO:0016787//hydrolase activity	-
miR2092-x	Unigene0112656	CXE6	608	4	2	0.01	5	5	PREDICTED: probable carboxylesterase 15 [Nelumbo nucifera]	-	-	-
miR2092-x	Unigene0012925	AP2M	476	4.5	2	0.01	2	1	PREDICTED: AP-2 complex subunit mu [Musa acuminata subsp. malaccensis] [Musa acuminata]	GO:0016020//membrane;GO:0005737//cytoplasm;GO:0030117//membrane coat;GO:0044444//cytoplasmic part;GO:0030119//AP-type membrane coat adaptor complex;GO:0043234//protein complex;GO:0005623//cell;GO:0098796//membrane protein complex;GO:0048475//coated membrane;GO:0044424//intracellular part;GO:0032991//macromolecular complex;GO:0005622//intracellular;GO:0044464//cell part;GO:0044425//membrane part	GO:0043168//anion binding;GO:0043167//ion binding;GO:0005488//binding	GO:0045184//establishment of protein localization;GO:0006810//transport;GO:0033036//macromolecule localization;GO:0051179//localization;GO:0008104//protein localization;GO:0008152//metabolic process;GO:0015031//protein transport;GO:0051234//establishment of localization;GO:0071702//organic substance transport
miR2092-x	Unigene0062012	-	168	4	2	0.01	8	2.66667	PREDICTED: lysophospholipid acyltransferase LPEAT2-like [Arachis ipaensis]	-	-	GO:0006629//lipid metabolic process;GO:0044699//single-organism process;GO:0008152//metabolic process;GO:0044238//primary metabolic process;GO:0071704//organic substance metabolic process;GO:0044710//single-organism metabolic process
miR2092-x	Unigene0002619	LPEAT2	960	4	2	0.01	8	2.66667	PREDICTED: lysophospholipid acyltransferase LPEAT2-like [Nelumbo nucifera]	GO:0016020//membrane	GO:0016746//transferase activity, transferring acyl groups;GO:0016740//transferase activity;GO:0003824//catalytic activity	GO:0006644//phospholipid metabolic process;GO:0044699//single-organism process;GO:0044710//single-organism metabolic process;GO:0008152//metabolic process;GO:0044255//cellular lipid metabolic process;GO:0019637//organophosphate metabolic process;GO:0044238//primary metabolic process;GO:0044237//cellular metabolic process;GO:0009987//cellular process;GO:0006793//phosphorus metabolic process;GO:004…
miR2092-x	Unigene0096216	LACS4	485	4	2	0.01	6	6	PREDICTED: long chain acyl-CoA synthetase 4-like isoform X2 [Nelumbo nucifera]	-	-	-
miR2092-x	Unigene0047292	-	385	4	2	0.01	2	1	PREDICTED: rRNA-processing protein EFG1 isoform X1 [Cucumis sativus]	-	-	-
miR2092-x	Unigene0001026	RNU1	48	4.5	2	0.01	5	2.5	PREDICTED: U1 small nuclear ribonucleoprotein 70 kDa-like [Nelumbo nucifera]	-	-	-
miR2092-x	Unigene0082191	DXR	1184	4.5	2	0.01	3	3	1-deoxy-D-xylulose 5-phosphate reductoisomerase [Cinnamomum camphora]	-	GO:0043168//anion binding;GO:0016614//oxidoreductase activity, acting on CH-OH group of donors;GO:0043169//cation binding;GO:0016491//oxidoreductase activity;GO:0016616//oxidoreductase activity, acting on the CH-OH group of donors, NAD or NADP as acceptor;GO:0003824//catalytic activity;GO:0043167//ion binding;GO:0005488//binding	GO:0044699//single-organism process;GO:0044710//single-organism metabolic process;GO:0008152//metabolic process
miR2092-x	Unigene0084975	GIP	369	4.5	2	0.01	3	3	Cysteine-rich RLK (receptor-like protein kinase) 8 [Dorcoceras hygrometricum]	-	-	-
miR2092-x	Unigene0010121	-	923	4.5	2	0.01	47	47	Tetratricopeptide-like helical [Cynara cardunculus var. scolymus] [Cynara cardunculus]	-	-	-
miR2092-x	Unigene0072604	CNOT3	51	4.5	2	0.01	3	3	CCR4-NOT transcription complex subunit 3 [Anthurium amnicola]	-	-	-
miR2092-x	Unigene0072538	PFP-BETA	990	4.5	2	0.01	9	9	PREDICTED: pyrophosphate--fructose 6-phosphate 1-phosphotransferase subunit beta [Nelumbo nucifera]	GO:0005623//cell;GO:0044424//intracellular part;GO:0030312//external encapsulating structure;GO:0044444//cytoplasmic part;GO:0005829//cytosol;GO:0044445//cytosolic part;GO:0044464//cell part;GO:0071944//cell periphery;GO:0005622//intracellular;GO:0005737//cytoplasm	GO:0097159//organic cyclic compound binding;GO:0016773//phosphotransferase activity, alcohol group as acceptor;GO:0097367//carbohydrate derivative binding;GO:0003824//catalytic activity;GO:0016740//transferase activity;GO:0016301//kinase activity;GO:0008443//phosphofructokinase activity;GO:0001883//purine nucleoside binding;GO:0036094//small molecule binding;GO:0005488//binding;GO:0019200//carboh…	GO:0051276//chromosome organization;GO:0018193//peptidyl-amino acid modification;GO:0006796//phosphate-containing compound metabolic process;GO:0008213//protein alkylation;GO:0044238//primary metabolic process;GO:0006084//acetyl-CoA metabolic process;GO:0019752//carboxylic acid metabolic process;GO:0010605//negative regulation of macromolecule metabolic process;GO:0009892//negative regulation of …
miR2092-x	Unigene0101058	TOM20	444	4.5	2	0.01	2	2	PREDICTED: mitochondrial import receptor subunit TOM20 isoform X1 [Musa acuminata subsp. malaccensis] [Musa acuminata]	GO:0005737//cytoplasm;GO:0044425//membrane part;GO:0031966//mitochondrial membrane;GO:0005840//ribosome;GO:0030529//intracellular ribonucleoprotein complex;GO:0043229//intracellular organelle;GO:0031090//organelle membrane;GO:0031975//envelope;GO:0005623//cell;GO:0044429//mitochondrial part;GO:0005622//intracellular;GO:0043227//membrane-bounded organelle;GO:0043228//non-membrane-bounded organelle…	GO:0008320//protein transmembrane transporter activity;GO:0043169//cation binding;GO:0022884//macromolecule transmembrane transporter activity;GO:0005215//transporter activity;GO:0043167//ion binding;GO:0005488//binding;GO:0022891//substrate-specific transmembrane transporter activity;GO:0022857//transmembrane transporter activity;GO:0022892//substrate-specific transporter activity;GO:0008565//pr…	GO:0051234//establishment of localization;GO:0051649//establishment of localization in cell;GO:0044765//single-organism transport;GO:0033036//macromolecule localization;GO:0070727//cellular macromolecule localization;GO:0006605//protein targeting;GO:0045184//establishment of protein localization;GO:0051641//cellular localization;GO:0051179//localization;GO:0006886//intracellular protein transport…
miR2092-x	Unigene0060075	ARP	405	2	2	0.01	3	3	PREDICTED: DNA-(apurinic or apyrimidinic site) lyase, chloroplastic isoform X1 [Nelumbo nucifera]	-	-	-
miR2092-x	Unigene0036078	MBF1B	114	3.5	2	0.01	4	4	PREDICTED: multiprotein-bridging factor 1b [Amborella trichopoda]	-	GO:1901363//heterocyclic compound binding;GO:0097159//organic cyclic compound binding;GO:0005488//binding;GO:0003677//DNA binding;GO:0003676//nucleic acid binding	-
miR2092-x	Unigene0005998	PIP5K1	2570	4	2	0.01	2	2	PREDICTED: phosphatidylinositol 4-phosphate 5-kinase 1-like [Nelumbo nucifera]	-	GO:0016740//transferase activity;GO:0016772//transferase activity, transferring phosphorus-containing groups;GO:0003824//catalytic activity;GO:0016301//kinase activity	GO:0046486//glycerolipid metabolic process;GO:0006629//lipid metabolic process;GO:0071704//organic substance metabolic process;GO:0044255//cellular lipid metabolic process;GO:0019637//organophosphate metabolic process;GO:0006793//phosphorus metabolic process;GO:0044238//primary metabolic process;GO:0006650//glycerophospholipid metabolic process;GO:0044763//single-organism cellular process;GO:0006…
miR2092-x	Unigene0043391	slr0305	320	4	2	0.01	4	4	PREDICTED: transmembrane protein 64 [Fragaria vesca subsp. vesca] [Fragaria vesca]	-	-	-
miR2092-x	Unigene0049034	HPD	691	4.5	2	0.01	10	10	PREDICTED: 4-hydroxyphenylpyruvate dioxygenase [Nelumbo nucifera]	-	GO:0003824//catalytic activity;GO:0005488//binding;GO:0043169//cation binding;GO:0043167//ion binding;GO:0016491//oxidoreductase activity	GO:0043436//oxoacid metabolic process;GO:0071704//organic substance metabolic process;GO:0006082//organic acid metabolic process;GO:0044238//primary metabolic process;GO:0044699//single-organism process;GO:0009987//cellular process;GO:0044281//small molecule metabolic process;GO:0044237//cellular metabolic process;GO:1901564//organonitrogen compound metabolic process;GO:0019752//carboxylic acid m…
miR2092-x	Unigene0033834	HSL1	1298	4.5	2	0.01	3	3	PREDICTED: receptor-like protein kinase HSL1 [Nelumbo nucifera]	-	-	-
miR2092-x	Unigene0043391	slr0305	319	4	2	0.01	4	4	PREDICTED: transmembrane protein 64 [Fragaria vesca subsp. vesca] [Fragaria vesca]	-	-	-
miR2092-x	Unigene0046213	eft201	1133	4	2	0.01	5	5	elongation factor 2 [Ananas comosus]	GO:0032991//macromolecular complex;GO:0030529//intracellular ribonucleoprotein complex;GO:1990904//ribonucleoprotein complex;GO:0044464//cell part;GO:0005622//intracellular;GO:0005623//cell;GO:0044424//intracellular part	GO:0097367//carbohydrate derivative binding;GO:0003824//catalytic activity;GO:0003723//RNA binding;GO:0016462//pyrophosphatase activity;GO:0032550//purine ribonucleoside binding;GO:0016818//hydrolase activity, acting on acid anhydrides, in phosphorus-containing anhydrides;GO:0016817//hydrolase activity, acting on acid anhydrides;GO:1901363//heterocyclic compound binding;GO:0032549//ribonucleoside…	GO:0044260//cellular macromolecule metabolic process;GO:0071704//organic substance metabolic process;GO:0008152//metabolic process;GO:1901576//organic substance biosynthetic process;GO:0009058//biosynthetic process;GO:0044249//cellular biosynthetic process;GO:0009059//macromolecule biosynthetic process;GO:0044237//cellular metabolic process;GO:0009987//cellular process;GO:0043170//macromolecule m…
miR2092-x	Unigene0056950	SBP2	1402	3.5	2	0.01	3	3	PREDICTED: selenium-binding protein 1 [Theobroma cacao]	-	-	-
miR2092-x	Unigene0080555	Acel_0614	1534	4.5	2	0.01	2	2	Cellulase protein [Theobroma cacao]	-	GO:0016787//hydrolase activity;GO:0003824//catalytic activity	GO:0044238//primary metabolic process;GO:0008152//metabolic process
miR2092-x	Unigene0065294	SKI3	431	4.5	2	0.01	2	2	PREDICTED: tetratricopeptide repeat protein SKI3 [Nelumbo nucifera]	-	-	-
miR2092-x	Unigene0079192	-	447	4	2	0.01	17	17	--	-	-	-
miR2092-x	Unigene0063854	HDH	1404	4.5	2	0.01	5	5	PREDICTED: histidinol dehydrogenase, chloroplastic isoform X1 [Elaeis guineensis]	GO:0009536//plastid;GO:0043226//organelle;GO:0044435//plastid part;GO:0005622//intracellular;GO:0043229//intracellular organelle;GO:0009532//plastid stroma;GO:0044444//cytoplasmic part;GO:0043227//membrane-bounded organelle;GO:0005737//cytoplasm;GO:0044422//organelle part;GO:0044424//intracellular part;GO:0005623//cell;GO:0043231//intracellular membrane-bounded organelle;GO:0044464//cell part;GO:…	GO:1901363//heterocyclic compound binding;GO:0046872//metal ion binding;GO:0043169//cation binding;GO:0003824//catalytic activity;GO:0036094//small molecule binding;GO:0046914//transition metal ion binding;GO:0016616//oxidoreductase activity, acting on the CH-OH group of donors, NAD or NADP as acceptor;GO:0016491//oxidoreductase activity;GO:1901265//nucleoside phosphate binding;GO:0016614//oxidor…	GO:0009058//biosynthetic process;GO:0006520//cellular amino acid metabolic process;GO:0007275//multicellular organism development;GO:0044106//cellular amine metabolic process;GO:0044237//cellular metabolic process;GO:1901564//organonitrogen compound metabolic process;GO:0044249//cellular biosynthetic process;GO:0009987//cellular process;GO:0044710//single-organism metabolic process;GO:0006807//ni…
miR2092-x	Unigene0112215	-	592	4.5	2	0.01	2	1	PREDICTED: translation initiation factor IF-2 isoform X1 [Cucumis melo]	-	-	-
miR2092-x	Unigene0112459	-	834	4	2	0.01	3	3	UDP-N-acetylmuramoylalanine--D-glutamate ligase [Anthurium amnicola]	GO:0043227//membrane-bounded organelle;GO:0043229//intracellular organelle;GO:0044434//chloroplast part;GO:0043226//organelle;GO:0009536//plastid;GO:0044435//plastid part;GO:0044446//intracellular organelle part;GO:0009507//chloroplast;GO:0043231//intracellular membrane-bounded organelle;GO:0044464//cell part;GO:0005737//cytoplasm;GO:0044422//organelle part;GO:0005623//cell;GO:0044424//intracellu…	-	-
miR2092-x	Unigene0108038	CCDC174	266	4.5	2	0.01	2	2	PREDICTED: uncharacterized protein At4g18257-like [Nelumbo nucifera]	-	-	-
miR2092-x	Unigene0060075	ARP	406	4	2	0.01	3	3	PREDICTED: DNA-(apurinic or apyrimidinic site) lyase, chloroplastic isoform X1 [Nelumbo nucifera]	-	-	-
miR2092-x	Unigene0044956	HST	415	4.5	2	0.01	2	2	PREDICTED: shikimate O-hydroxycinnamoyltransferase [Nelumbo nucifera]	-	-	-
miR2092-x	Unigene0079454	At1g04430	2176	4	2	0.01	2	2	PREDICTED: probable methyltransferase PMT3 [Eucalyptus grandis]	-	-	-
miR2092-x	Unigene0009495	DI19-6	527	4.5	2	0.01	3	3	PREDICTED: protein DEHYDRATION-INDUCED 19 homolog 5-like [Nelumbo nucifera]	-	-	-
miR2092-x	Unigene0069696	-	243	4	2	0.01	3	3	--	-	-	-
miR2092-x	Unigene0004962	-	495	3.5	2	0.01	2	1	octicosapeptide/Phox/Bem1p domain-containing family protein [Populus trichocarpa]	-	-	-
miR2092-x	Unigene0083769	SPT16	2714	4.5	2	0.01	5	5	PREDICTED: FACT complex subunit SPT16 [Vitis vinifera]	-	-	-
miR2092-x	Unigene0077562	G3bp1	2850	4	2	0.01	3	3	PREDICTED: ras GTPase-activating protein-binding protein 2 isoform X2 [Nelumbo nucifera]	-	-	-
miR2092-x	Unigene0066086	At3g50210	1792	4.5	2	0.01	4	4	PREDICTED: probable 2-oxoglutarate-dependent dioxygenase At3g49630 [Ziziphus jujuba]	-	GO:0016491//oxidoreductase activity;GO:0046872//metal ion binding;GO:0005488//binding;GO:0046914//transition metal ion binding;GO:0043167//ion binding;GO:0043169//cation binding;GO:0016705//oxidoreductase activity, acting on paired donors, with incorporation or reduction of molecular oxygen;GO:0003824//catalytic activity	GO:0008152//metabolic process;GO:0044699//single-organism process;GO:0044710//single-organism metabolic process
miR2092-x	Unigene0043147	RNU1	48	4.5	2	0.01	5	2.5	PREDICTED: U1 small nuclear ribonucleoprotein 70 kDa-like [Nelumbo nucifera]	-	-	-
miR2092-x	Unigene0104922	HHT1	529	4	2	0.01	3	3	PREDICTED: omega-hydroxypalmitate O-feruloyl transferase-like [Nelumbo nucifera]	-	GO:0016747//transferase activity, transferring acyl groups other than amino-acyl groups;GO:0016740//transferase activity;GO:0003824//catalytic activity;GO:0016746//transferase activity, transferring acyl groups	-
miR2092-x	Unigene0110771	44257	541	4.5	2	0.01	3	3	PREDICTED: mitochondrial amidoxime reducing component 2 isoform X1 [Nelumbo nucifera]	-	GO:0046914//transition metal ion binding;GO:0043167//ion binding;GO:0005488//binding;GO:0043169//cation binding;GO:0043168//anion binding;GO:0046872//metal ion binding	-
miR2092-x	Unigene0101732	-	206	3.5	2	0.01	2	2	hypothetical protein BRADI_1g78126 [Brachypodium distachyon]	-	-	-
miR2092-x	Unigene0056649	At4g32940	1462	4.5	2	0.01	6	6	PREDICTED: vacuolar-processing enzyme [Elaeis guineensis]	-	GO:0003824//catalytic activity;GO:0016787//hydrolase activity	GO:0019538//protein metabolic process;GO:0044238//primary metabolic process;GO:0071704//organic substance metabolic process;GO:0008152//metabolic process;GO:0043170//macromolecule metabolic process
miR2092-x	Unigene0046142	TPI	212	4.5	2	0.01	14	7	PREDICTED: triosephosphate isomerase, chloroplastic [Juglans regia]	GO:0005622//intracellular;GO:0005576//extracellular region;GO:0031967//organelle envelope;GO:0043229//intracellular organelle;GO:0044422//organelle part;GO:0005737//cytoplasm;GO:0044444//cytoplasmic part;GO:0043227//membrane-bounded organelle;GO:0043231//intracellular membrane-bounded organelle;GO:0005623//cell;GO:0044446//intracellular organelle part;GO:0044424//intracellular part;GO:0044435//pl…	GO:0016853//isomerase activity;GO:0016861//intramolecular oxidoreductase activity, interconverting aldoses and ketoses;GO:0016860//intramolecular oxidoreductase activity;GO:0003824//catalytic activity	GO:0009072//aromatic amino acid family metabolic process;GO:0033036//macromolecule localization;GO:0044262//cellular carbohydrate metabolic process;GO:0044707//single-multicellular organism process;GO:1901566//organonitrogen compound biosynthetic process;GO:0006071//glycerol metabolic process;GO:0010817//regulation of hormone levels;GO:0022622//root system development;GO:0009628//response to abio…
miR2092-x	Unigene0035647	RHD3	438	4.5	2	0.01	6	6	PREDICTED: protein ROOT HAIR DEFECTIVE 3 [Elaeis guineensis]	GO:0005622//intracellular;GO:0031090//organelle membrane;GO:0005623//cell;GO:0044422//organelle part;GO:0044464//cell part;GO:0031224//intrinsic component of membrane;GO:0043231//intracellular membrane-bounded organelle;GO:0016020//membrane;GO:0044425//membrane part;GO:0043226//organelle;GO:0043227//membrane-bounded organelle;GO:0043229//intracellular organelle;GO:0044424//intracellular part	GO:0016818//hydrolase activity, acting on acid anhydrides, in phosphorus-containing anhydrides;GO:0001882//nucleoside binding;GO:0032550//purine ribonucleoside binding;GO:0003824//catalytic activity;GO:0032549//ribonucleoside binding;GO:1901363//heterocyclic compound binding;GO:0016817//hydrolase activity, acting on acid anhydrides;GO:0016462//pyrophosphatase activity;GO:0017111//nucleoside-triph…	-
miR2092-x	Unigene0010426	SUPT6H	4515	4	2	0.01	3	3	PREDICTED: transcription elongation factor SPT6 homolog [Nelumbo nucifera]	-	-	GO:0051252//regulation of RNA metabolic process;GO:0019219//regulation of nucleobase-containing compound metabolic process;GO:0031326//regulation of cellular biosynthetic process;GO:2001141//regulation of RNA biosynthetic process;GO:0019222//regulation of metabolic process;GO:0050794//regulation of cellular process;GO:0065007//biological regulation;GO:0009889//regulation of biosynthetic process;G…
miR2092-x	Unigene0046141	TPIP1	807	4.5	2	0.01	14	7	PREDICTED: triosephosphate isomerase, chloroplastic isoform X1 [Nelumbo nucifera]	GO:0005576//extracellular region;GO:0044444//cytoplasmic part;GO:0044446//intracellular organelle part;GO:0009536//plastid;GO:0031975//envelope;GO:0005737//cytoplasm;GO:0005622//intracellular;GO:0044424//intracellular part;GO:0043226//organelle;GO:0043229//intracellular organelle;GO:0043227//membrane-bounded organelle;GO:0044422//organelle part;GO:0009532//plastid stroma;GO:0044435//plastid part;…	GO:0016853//isomerase activity;GO:0003824//catalytic activity;GO:0016861//intramolecular oxidoreductase activity, interconverting aldoses and ketoses;GO:0016860//intramolecular oxidoreductase activity	GO:0044711//single-organism biosynthetic process;GO:0006790//sulfur compound metabolic process;GO:0006796//phosphate-containing compound metabolic process;GO:0009628//response to abiotic stimulus;GO:0033036//macromolecule localization;GO:0009058//biosynthetic process;GO:0007275//multicellular organism development;GO:0000003//reproduction;GO:0099402//plant organ development;GO:0008152//metabolic p…
miR2092-x	Unigene0062014	-	170	4	2	0.01	8	2.66667	PREDICTED: lysophospholipid acyltransferase LPEAT2-like [Arachis ipaensis]	-	-	-
miR2092-x	Unigene0087956	-	947	4.5	2	0.01	6	6	PREDICTED: eukaryotic translation initiation factor 4B3-like [Nelumbo nucifera]	-	-	-
miR2092-x	Unigene0024617	At2g44510	663	4.5	2	0.01	3	1.5	PREDICTED: protein BCCIP homolog isoform X1 [Nelumbo nucifera]	-	-	-
miR2092-x	Unigene0083775	RDR1	1975	4	2	0.01	2	2	PREDICTED: probable RNA-dependent RNA polymerase 1 [Phoenix dactylifera]	-	-	-
miR2092-x	Unigene0049085	At3g50520	1237	4	2	0.01	2	2	PREDICTED: phosphoglycerate mutase-like protein 4 isoform X1 [Nelumbo nucifera]	-	-	-
miR2092-x	Unigene0083702	CCR1	406	4	2	0.01	3	3	Bifunctional dihydroflavonol 4-reductase/flavanone 4-reductase [Morus notabilis]	-	GO:0048037//cofactor binding;GO:0005488//binding	-
miR2092-x	Unigene0010188	CDF2	582	3.5	2	0.01	2	2	PREDICTED: cyclic dof factor 3-like [Nelumbo nucifera]	-	-	-
miR2092-x	Unigene0052777	SOD	433	4	2	0.01	8	8	PREDICTED: superoxide dismutase [Mn], mitochondrial [Gossypium hirsutum]	-	GO:0043167//ion binding;GO:0043169//cation binding;GO:0003824//catalytic activity;GO:0005488//binding	GO:0009987//cellular process;GO:0044237//cellular metabolic process;GO:0072593//reactive oxygen species metabolic process;GO:0044710//single-organism metabolic process;GO:0006801//superoxide metabolic process;GO:0008152//metabolic process;GO:0044699//single-organism process
miR2092-x	Unigene0056422	At1g67280	1276	4.5	2	0.01	3	3	PREDICTED: probable lactoylglutathione lyase, chloroplastic [Nelumbo nucifera]	-	-	-
miR2092-x	Unigene0069181	BGAL16	1195	4	2	0.01	4	4	PREDICTED: beta-galactosidase 16 isoform X2 [Nelumbo nucifera]	GO:0005576//extracellular region	GO:0016798//hydrolase activity, acting on glycosyl bonds;GO:0004553//hydrolase activity, hydrolyzing O-glycosyl compounds;GO:0016787//hydrolase activity;GO:0003824//catalytic activity	GO:0008152//metabolic process
miR2092-x	Unigene0100663	rps5	275	4	2	0.01	12	12	PREDICTED: 30S ribosomal protein S5, chloroplastic [Nelumbo nucifera]	GO:0005737//cytoplasm;GO:0032991//macromolecular complex;GO:0044446//intracellular organelle part;GO:0044464//cell part;GO:0005623//cell;GO:0030529//intracellular ribonucleoprotein complex;GO:0009507//chloroplast;GO:0031976//plastid thylakoid;GO:0043228//non-membrane-bounded organelle;GO:0044444//cytoplasmic part;GO:0009536//plastid;GO:0031984//organelle subcompartment;GO:0043232//intracellular n…	-	-
miR2092-x	Unigene0059377	-	885	4.5	2	0.01	2	1	PREDICTED: CTL-like protein DDB_G0274487 [Elaeis guineensis]	GO:0016020//membrane;GO:0044425//membrane part;GO:0031224//intrinsic component of membrane	-	GO:0043436//oxoacid metabolic process;GO:0008652//cellular amino acid biosynthetic process;GO:0044238//primary metabolic process;GO:0044711//single-organism biosynthetic process;GO:0044249//cellular biosynthetic process;GO:0044281//small molecule metabolic process;GO:0000096//sulfur amino acid metabolic process;GO:0044710//single-organism metabolic process;GO:0016053//organic acid biosynthetic pr…
miR2092-x	Unigene0060075	ARP	404	4	2	0.01	5	5	PREDICTED: DNA-(apurinic or apyrimidinic site) lyase, chloroplastic isoform X1 [Nelumbo nucifera]	-	-	-
miR2092-x	Unigene0111149	Os05g0558800	1976	4.5	2	0.01	3	3	PREDICTED: ninja-family protein mc410 [Nelumbo nucifera]	-	-	-
miR2092-x	Unigene0057480	FTSH12	2011	4.5	2	0.01	2	2	PREDICTED: ATP-dependent zinc metalloprotease FTSH 12, chloroplastic [Nelumbo nucifera]	GO:0043229//intracellular organelle;GO:0009507//chloroplast;GO:0009536//plastid;GO:0044446//intracellular organelle part;GO:0016020//membrane;GO:0043231//intracellular membrane-bounded organelle;GO:0044422//organelle part;GO:0005622//intracellular;GO:0031967//organelle envelope;GO:0031224//intrinsic component of membrane;GO:0044434//chloroplast part;GO:0044464//cell part;GO:0044424//intracellular…	GO:0017111//nucleoside-triphosphatase activity;GO:0001882//nucleoside binding;GO:0001883//purine nucleoside binding;GO:0003824//catalytic activity;GO:0097159//organic cyclic compound binding;GO:0070011//peptidase activity, acting on L-amino acid peptides;GO:0043167//ion binding;GO:0016817//hydrolase activity, acting on acid anhydrides;GO:1901363//heterocyclic compound binding;GO:0032550//purine r…	GO:0009987//cellular process;GO:1901575//organic substance catabolic process;GO:0022414//reproductive process;GO:0044267//cellular protein metabolic process;GO:0016043//cellular component organization;GO:0009057//macromolecule catabolic process;GO:0030163//protein catabolic process;GO:0044257//cellular protein catabolic process;GO:0006996//organelle organization;GO:0008152//metabolic process;GO:0…
miR2092-x	Unigene0039685	At4g17486	430	4.5	2	0.01	2	1	PREDICTED: deSI-like protein At4g17486 [Vitis vinifera]	-	-	-
miR2092-x	Unigene0021919	-	193	4	2	0.01	3	3	PREDICTED: transmembrane protein 33 homolog [Juglans regia]	GO:0044425//membrane part;GO:0005911//cell-cell junction;GO:0016020//membrane;GO:0043231//intracellular membrane-bounded organelle;GO:0031224//intrinsic component of membrane;GO:0044464//cell part;GO:0043229//intracellular organelle;GO:0005623//cell;GO:0005622//intracellular;GO:0030054//cell junction;GO:0043227//membrane-bounded organelle;GO:0043226//organelle;GO:0044424//intracellular part	-	-
miR2092-x	Unigene0007850	TAF15B	708	4.5	2	0.01	7	7	PREDICTED: transcription initiation factor TFIID subunit 15b-like isoform X1 [Glycine max]	-	-	-
miR2092-x	Unigene0033406	ACCB-1	771	3.5	2	0.01	10	10	biotin carboxyl carrier protein [Persea americana]	-	-	-
miR2092-x	Unigene0007647	PCKA	1449	4.5	2	0.01	4	4	PREDICTED: phosphoenolpyruvate carboxykinase [ATP]-like [Juglans regia]	-	-	-
miR2092-x	Unigene0058815	P4H4	205	4.5	2	0.01	3	3	PREDICTED: probable prolyl 4-hydroxylase 4 [Nelumbo nucifera]	-	GO:0019842//vitamin binding;GO:0016491//oxidoreductase activity;GO:0046914//transition metal ion binding;GO:0046872//metal ion binding;GO:0003824//catalytic activity;GO:0016705//oxidoreductase activity, acting on paired donors, with incorporation or reduction of molecular oxygen;GO:0036094//small molecule binding;GO:0005488//binding;GO:0043169//cation binding;GO:0043167//ion binding	GO:0044267//cellular protein metabolic process;GO:0044237//cellular metabolic process;GO:0044710//single-organism metabolic process;GO:0008152//metabolic process;GO:0071704//organic substance metabolic process;GO:0006464//cellular protein modification process;GO:0019538//protein metabolic process;GO:0044699//single-organism process;GO:0043170//macromolecule metabolic process;GO:0043412//macromole…
miR2092-x	Unigene0081554	bbp-1	323	4	2	0.01	2	2	PREDICTED: splicing factor 1 [Nelumbo nucifera]	-	GO:0003676//nucleic acid binding;GO:0005488//binding;GO:0097159//organic cyclic compound binding;GO:1901363//heterocyclic compound binding	-
miR2092-x	Unigene0066140	Cag_1601	2346	3.5	2	0.01	2	2	PREDICTED: UPF0301 protein Cpha266_0885 [Citrus sinensis]	-	-	-
miR2092-x	Unigene0076099	VIII-1	492	4.5	2	0.01	2	2	PREDICTED: myosin-1-like [Nelumbo nucifera]	GO:0043229//intracellular organelle;GO:0044424//intracellular part;GO:0005622//intracellular;GO:0043232//intracellular non-membrane-bounded organelle;GO:0005856//cytoskeleton;GO:0043228//non-membrane-bounded organelle;GO:0005623//cell;GO:0043226//organelle;GO:0015629//actin cytoskeleton;GO:0044464//cell part	GO:0005488//binding;GO:1901363//heterocyclic compound binding;GO:0097159//organic cyclic compound binding;GO:0032549//ribonucleoside binding;GO:0016462//pyrophosphatase activity;GO:0016818//hydrolase activity, acting on acid anhydrides, in phosphorus-containing anhydrides;GO:0001883//purine nucleoside binding;GO:0097367//carbohydrate derivative binding;GO:0032550//purine ribonucleoside binding;GO…	-
miR2092-x	Unigene0077941	HATB	1158	3.5	2	0.01	3	3	PREDICTED: probable histone acetyltransferase type B catalytic subunit [Elaeis guineensis]	-	-	GO:0009987//cellular process
miR2092-x	Unigene0000445	At4g17486	430	4.5	2	0.01	2	1	PREDICTED: deSI-like protein At4g17486 [Vitis vinifera]	-	-	-
miR2092-x	Unigene0073469	PP2B10	1660	4	2	0.01	2	2	PREDICTED: F-box protein PP2-B15-like [Nelumbo nucifera]	-	-	-
miR2092-x	Unigene0004962	-	225	3.5	2	0.01	2	1	octicosapeptide/Phox/Bem1p domain-containing family protein [Populus trichocarpa]	-	-	-
miR2092-x	Unigene0111819	RPE	773	2.5	2	0.01	2	2	PREDICTED: ribulose-phosphate 3-epimerase, chloroplastic [Nelumbo nucifera]	GO:0031967//organelle envelope;GO:0005622//intracellular;GO:0005623//cell;GO:0043226//organelle;GO:0043229//intracellular organelle;GO:0005737//cytoplasm;GO:0009532//plastid stroma;GO:0009536//plastid;GO:0043231//intracellular membrane-bounded organelle;GO:0044435//plastid part;GO:0044422//organelle part;GO:0043227//membrane-bounded organelle;GO:0044444//cytoplasmic part;GO:0009526//plastid envel…	GO:0016857//racemase and epimerase activity, acting on carbohydrates and derivatives;GO:0016854//racemase and epimerase activity;GO:0043169//cation binding;GO:0043167//ion binding;GO:0005488//binding;GO:0003824//catalytic activity;GO:0016853//isomerase activity	GO:0006739//NADP metabolic process;GO:0044237//cellular metabolic process;GO:0006807//nitrogen compound metabolic process;GO:0006733//oxidoreduction coenzyme metabolic process;GO:0071704//organic substance metabolic process;GO:1901360//organic cyclic compound metabolic process;GO:0009617//response to bacterium;GO:1901564//organonitrogen compound metabolic process;GO:0051186//cofactor metabolic pr…
miR2092-x	Unigene0056689	UKL3	749	4.5	2	0.01	2	2	PREDICTED: uridine kinase-like protein 3 [Vitis vinifera]	-	GO:0019205//nucleobase-containing compound kinase activity;GO:0032549//ribonucleoside binding;GO:0036094//small molecule binding;GO:0005488//binding;GO:1901363//heterocyclic compound binding;GO:0097367//carbohydrate derivative binding;GO:0001883//purine nucleoside binding;GO:0019206//nucleoside kinase activity;GO:0001882//nucleoside binding;GO:0097159//organic cyclic compound binding;GO:0016772//…	GO:0009259//ribonucleotide metabolic process;GO:0044238//primary metabolic process;GO:0009123//nucleoside monophosphate metabolic process;GO:0019693//ribose phosphate metabolic process;GO:1901564//organonitrogen compound metabolic process;GO:0009209//pyrimidine ribonucleoside triphosphate biosynthetic process;GO:0009147//pyrimidine nucleoside triphosphate metabolic process;GO:0046134//pyrimidine …
miR2092-x	Unigene0016267	DHAR2	298	4.5	2	0.01	2	2	PREDICTED: glutathione S-transferase DHAR2 [Amborella trichopoda]	-	-	-
miR2092-x	Unigene0041329	At2g17670	1211	3.5	2	0.01	2	2	PREDICTED: pentatricopeptide repeat-containing protein At2g17670 [Nelumbo nucifera]	-	-	-
miR2092-x	Unigene0100675	CCDC25	2233	3.5	2	0.01	4	4	PREDICTED: coiled-coil domain-containing protein 25 [Amborella trichopoda]	-	-	GO:0006810//transport;GO:0051234//establishment of localization;GO:0051179//localization
miR2092-x	Unigene0059022	RPS15AA	133	4.5	2	0.01	35	17.5	PREDICTED: 40S ribosomal protein S15a-1-like [Gossypium hirsutum]	-	-	-
miR390-y	Unigene0031282	RANBP1C	665	4.5	2	0	12	12	Ran-binding protein 1-b-like protein [Morus notabilis]	-	-	-
miR390-y	Unigene0043301	KN1	899	4	2	0.002	2	1	PREDICTED: homeobox protein knotted-1-like 2 [Theobroma cacao]	GO:0043231//intracellular membrane-bounded organelle;GO:0005623//cell;GO:0043226//organelle;GO:0044424//intracellular part;GO:0043229//intracellular organelle;GO:0005622//intracellular;GO:0043227//membrane-bounded organelle;GO:0044464//cell part	GO:0097159//organic cyclic compound binding;GO:0001071//nucleic acid binding transcription factor activity;GO:0003676//nucleic acid binding;GO:0005488//binding;GO:1901363//heterocyclic compound binding;GO:0003677//DNA binding	GO:0009933//meristem structural organization;GO:0048856//anatomical structure development;GO:0003002//regionalization;GO:0000003//reproduction;GO:0060255//regulation of macromolecule metabolic process;GO:0007389//pattern specification process;GO:0048507//meristem development;GO:0003006//developmental process involved in reproduction;GO:0009799//specification of symmetry;GO:0032501//multicellular …
miR390-y	Unigene0046250	-	2113	4	2	0.002	3	1.5	Glutamate--cysteine ligase [Anthurium amnicola]	-	-	-
miR390-y	Unigene0113115	SLC47A2	361	4.5	2	0.002	4	4	PREDICTED: protein DETOXIFICATION 55-like [Nelumbo nucifera]	GO:0044425//membrane part;GO:0031224//intrinsic component of membrane;GO:0016020//membrane	GO:0005215//transporter activity;GO:0015291//secondary active transmembrane transporter activity;GO:0022804//active transmembrane transporter activity;GO:0022857//transmembrane transporter activity	GO:0009987//cellular process;GO:0044699//single-organism process;GO:0044763//single-organism cellular process
miR390-y	Unigene0046642	-	3698	4.5	2	0.002	4	4	PREDICTED: autophagy-related protein 11 [Nelumbo nucifera]	-	-	-
miR390-y	Unigene0060307	GAE6	418	4.5	2	0.002	2	2	PREDICTED: UDP-glucuronate 4-epimerase 6 [Vitis vinifera]	GO:0016020//membrane;GO:0005623//cell;GO:0098588//bounding membrane of organelle;GO:0012505//endomembrane system;GO:0043231//intracellular membrane-bounded organelle;GO:0044422//organelle part;GO:0043227//membrane-bounded organelle;GO:0031984//organelle subcompartment;GO:0005622//intracellular;GO:0044431//Golgi apparatus part;GO:0044424//intracellular part;GO:0005794//Golgi apparatus;GO:0000139//…	GO:0016857//racemase and epimerase activity, acting on carbohydrates and derivatives;GO:0003824//catalytic activity;GO:0005488//binding;GO:0016854//racemase and epimerase activity;GO:0048037//cofactor binding;GO:0016853//isomerase activity	GO:0006586//indolalkylamine metabolic process;GO:0044106//cellular amine metabolic process;GO:0009850//auxin metabolic process;GO:0071704//organic substance metabolic process;GO:0009987//cellular process;GO:0009683//indoleacetic acid metabolic process;GO:0006520//cellular amino acid metabolic process;GO:0006807//nitrogen compound metabolic process;GO:0032787//monocarboxylic acid metabolic process…
miR390-y	Unigene0046249	-	2113	4	2	0.002	3	1.5	Glutamate--cysteine ligase [Anthurium amnicola]	-	-	-
miR390-y	Unigene0065795	RABB1C	730	4	2	0.002	3	3	PREDICTED: ras-related protein RABB1c-like [Phoenix dactylifera]	-	-	-
miR390-y	Unigene0079123	At4g22670	266	4.5	2	0.002	5	5	PREDICTED: TPR repeat-containing thioredoxin TDX isoform X1 [Musa acuminata subsp. malaccensis] [Musa acuminata]	-	-	-
miR390-y	Unigene0034001	ABCF1	1466	4.5	2	0.002	7	7	PREDICTED: ABC transporter F family member 1-like [Nelumbo nucifera]	-	GO:0097159//organic cyclic compound binding;GO:0097367//carbohydrate derivative binding;GO:0016817//hydrolase activity, acting on acid anhydrides;GO:1901363//heterocyclic compound binding;GO:0016462//pyrophosphatase activity;GO:0017111//nucleoside-triphosphatase activity;GO:0036094//small molecule binding;GO:0001882//nucleoside binding;GO:0032549//ribonucleoside binding;GO:0032550//purine ribonuc…	-
miR390-y	Unigene0020244	-	796	4	2	0	2	2	TAC1 [Prunus persica]	-	-	-
miR390-y	Unigene0043302	KN1	170	4	2	0.002	2	1	PREDICTED: homeobox protein knotted-1-like 2 [Theobroma cacao]	GO:0005623//cell;GO:0043229//intracellular organelle;GO:0043226//organelle;GO:0043231//intracellular membrane-bounded organelle;GO:0044424//intracellular part;GO:0044464//cell part;GO:0043227//membrane-bounded organelle;GO:0005622//intracellular	GO:0005488//binding;GO:0001071//nucleic acid binding transcription factor activity;GO:0097159//organic cyclic compound binding;GO:1901363//heterocyclic compound binding;GO:0003677//DNA binding;GO:0003676//nucleic acid binding	GO:0009799//specification of symmetry;GO:0000003//reproduction;GO:0044699//single-organism process;GO:0032502//developmental process;GO:0009798//axis specification;GO:0048507//meristem development;GO:0044763//single-organism cellular process;GO:0044767//single-organism developmental process;GO:0032501//multicellular organismal process;GO:0009888//tissue development;GO:0044707//single-multicellula…
miR390-y	Unigene0041423	COAD	111	4.5	2	0.002	2	1	PREDICTED: phosphopantetheine adenylyltransferase [Nelumbo nucifera]	-	-	-
miR390-y	Unigene0041422	Os07g0179400	563	4.5	2	0.002	2	1	PREDICTED: phosphopantetheine adenylyltransferase [Nelumbo nucifera]	-	-	-
miR390-y	Unigene0054879	ATHB-15	1404	4.5	2	0.002	2	2	PREDICTED: homeobox-leucine zipper protein ATHB-15-like [Nelumbo nucifera]	GO:0043229//intracellular organelle;GO:0043231//intracellular membrane-bounded organelle;GO:0043226//organelle;GO:0005623//cell;GO:0044424//intracellular part;GO:0005622//intracellular;GO:0044464//cell part;GO:0043227//membrane-bounded organelle	GO:0003676//nucleic acid binding;GO:0001071//nucleic acid binding transcription factor activity;GO:0003677//DNA binding;GO:1901363//heterocyclic compound binding;GO:0097159//organic cyclic compound binding;GO:0005488//binding	GO:0048869//cellular developmental process;GO:0006950//response to stress;GO:0071840//cellular component organization or biogenesis;GO:1902589//single-organism organelle organization;GO:0030036//actin cytoskeleton organization;GO:0007015//actin filament organization;GO:0000902//cell morphogenesis;GO:0022622//root system development;GO:0009943//adaxial/abaxial axis specification;GO:0048513//animal…
miR390-y	Unigene0069197	JMJ25	3346	3	2	0.002	3	3	PREDICTED: LOW QUALITY PROTEIN: lysine-specific demethylase JMJ25-like [Phoenix dactylifera]	-	-	-
miR395-y	Unigene0063979	zgc:66014	2505	3.5	2	0.004	3	3	PREDICTED: lisH domain and HEAT repeat-containing protein KIAA1468 homolog [Vitis vinifera]	-	-	-
miR395-y	Unigene0065103	TMN1	636	4.5	2	0.004	3	1.5	PREDICTED: transmembrane 9 superfamily member 1 [Daucus carota subsp. sativus] [Daucus carota]	-	-	-
miR395-y	Unigene0086027	Rwdd1	798	4.5	2	0.004	5	5	PREDICTED: RWD domain-containing protein 1 isoform X2 [Nelumbo nucifera]	-	-	-
miR395-y	Unigene0060290	Wdfy3	749	4.5	2	0.004	2	2	PREDICTED: protein SPIRRIG [Vitis vinifera]	-	-	-
miR395-y	Unigene0004000	WVD2	1381	4	2	0.004	2	2	PREDICTED: protein WVD2-like 5 [Nelumbo nucifera]	-	-	-
miR395-y	Unigene0054035	APS3	409	0.5	0	0	18	18	PREDICTED: ATP sulfurylase 1, chloroplastic [Nelumbo nucifera]	-	GO:0016740//transferase activity;GO:0070566//adenylyltransferase activity;GO:0016779//nucleotidyltransferase activity;GO:0016772//transferase activity, transferring phosphorus-containing groups;GO:0003824//catalytic activity;GO:0004779//sulfate adenylyltransferase activity	-
miR395-y	Unigene0033936	TT12	272	4	2	0.004	2	2	PREDICTED: protein DETOXIFICATION 35 [Nelumbo nucifera]	GO:0044425//membrane part;GO:0016020//membrane;GO:0031224//intrinsic component of membrane	GO:0005215//transporter activity;GO:0015291//secondary active transmembrane transporter activity;GO:0022804//active transmembrane transporter activity;GO:0022857//transmembrane transporter activity	GO:0009653//anatomical structure morphogenesis;GO:0030154//cell differentiation;GO:0000902//cell morphogenesis;GO:0048869//cellular developmental process;GO:0048468//cell development;GO:0006928//movement of cell or subcellular component;GO:0016043//cellular component organization;GO:0044767//single-organism developmental process;GO:0000904//cell morphogenesis involved in differentiation;GO:000998…
miR395-y	Unigene0053344	At1g17710	201	3.5	2	0.004	3	1.5	PREDICTED: inorganic pyrophosphatase 1 [Nelumbo nucifera]	-	GO:0016788//hydrolase activity, acting on ester bonds;GO:0042578//phosphoric ester hydrolase activity;GO:0003824//catalytic activity;GO:0016787//hydrolase activity	GO:0006793//phosphorus metabolic process;GO:0044237//cellular metabolic process;GO:0009987//cellular process;GO:0008152//metabolic process;GO:0006796//phosphate-containing compound metabolic process
miR395-y	Unigene0074989	CDKG-2	525	4	2	0.004	4	4	PREDICTED: cyclin-dependent kinase G-2 isoform X2 [Nelumbo nucifera]	-	GO:0016740//transferase activity;GO:0003824//catalytic activity	-
miR395-y	Unigene0014009	GAMMACAL1	805	3.5	2	0.004	2	1	PREDICTED: gamma carbonic anhydrase-like 2, mitochondrial [Nelumbo nucifera]	-	-	-
miR395-y	Unigene0059226	FEN1	708	4.5	2	0.004	4	4	PREDICTED: flap endonuclease 1 isoform X2 [Prunus mume]	-	-	-
miR395-y	Unigene0028143	PEX11C	135	4.5	2	0.004	3	3	Peroxisomal membrane protein 11C [Morus notabilis]	-	-	GO:0007031//peroxisome organization;GO:0016043//cellular component organization;GO:0009987//cellular process;GO:0006996//organelle organization;GO:0071840//cellular component organization or biogenesis
miR395-y	Unigene0053343	At1g17710	235	3.5	2	0.004	3	1.5	PREDICTED: inorganic pyrophosphatase 1 [Nelumbo nucifera]	-	GO:0003824//catalytic activity;GO:0042578//phosphoric ester hydrolase activity;GO:0016788//hydrolase activity, acting on ester bonds;GO:0016787//hydrolase activity	GO:0006796//phosphate-containing compound metabolic process;GO:0006793//phosphorus metabolic process;GO:0044237//cellular metabolic process;GO:0009987//cellular process;GO:0008152//metabolic process
miR395-y	Unigene0108877	RANBP1C	508	4.5	2	0.004	14	14	Ran-binding protein 1-b-like protein [Morus notabilis]	-	-	-
miR395-y	Unigene0038383	FRS5	351	4.5	2	0.004	2	1	PREDICTED: protein FAR1-RELATED SEQUENCE 5 [Amborella trichopoda]	-	-	-
miR395-y	Unigene0065105	TMN1	1516	4.5	2	0.004	3	1.5	PREDICTED: transmembrane 9 superfamily member 1-like isoform X1 [Gossypium raimondii]	-	-	-
miR395-y	Unigene0071566	ypi1	38	4.5	2	0.004	2	1	PREDICTED: LOW QUALITY PROTEIN: type 1 phosphatases regulator ypi1 [Cucumis melo]	GO:0032991//macromolecular complex;GO:1903293//phosphatase complex;GO:0005622//intracellular;GO:0044424//intracellular part;GO:0043234//protein complex;GO:0043226//organelle;GO:0043227//membrane-bounded organelle;GO:0044464//cell part;GO:0043231//intracellular membrane-bounded organelle;GO:0005623//cell;GO:0043229//intracellular organelle;GO:1902494//catalytic complex;GO:0008287//protein serine/t…	-	GO:0031323//regulation of cellular metabolic process;GO:0022414//reproductive process;GO:0035308//negative regulation of protein dephosphorylation;GO:0050790//regulation of catalytic activity;GO:0045936//negative regulation of phosphate metabolic process;GO:0080090//regulation of primary metabolic process;GO:0019220//regulation of phosphate metabolic process;GO:0051248//negative regulation of pro…
miR395-y	Unigene0085968	NUA	998	4	2	0.004	4	4	PREDICTED: nuclear-pore anchor isoform X3 [Nelumbo nucifera]	-	-	-
miR395-y	Unigene0094505	PURA1	771	4	2	0.004	4	4	PREDICTED: transcription factor Pur-alpha 1-like [Nelumbo nucifera]	-	-	-
miR395-y	Unigene0001903	SYT1	1038	4.5	2	0	3	3	PREDICTED: synaptotagmin-2-like [Nelumbo nucifera]	-	-	-
miR395-y	Unigene0025431	ACS10	1123	4.5	2	0.004	4	4	PREDICTED: probable aminotransferase ACS10 [Theobroma cacao]	-	GO:0043167//ion binding;GO:0005488//binding;GO:0016769//transferase activity, transferring nitrogenous groups;GO:0008483//transaminase activity;GO:0016740//transferase activity;GO:0003824//catalytic activity;GO:0043168//anion binding	GO:0044281//small molecule metabolic process;GO:0071704//organic substance metabolic process;GO:0044237//cellular metabolic process;GO:0019752//carboxylic acid metabolic process;GO:0006082//organic acid metabolic process;GO:0043436//oxoacid metabolic process;GO:0008152//metabolic process;GO:0044699//single-organism process;GO:0009987//cellular process;GO:0044763//single-organism cellular process;…
miR395-y	Unigene0071561	ypi1	38	4.5	2	0.004	2	1	PREDICTED: LOW QUALITY PROTEIN: type 1 phosphatases regulator ypi1 [Cucumis melo]	GO:0005623//cell;GO:0044424//intracellular part;GO:0043229//intracellular organelle;GO:1903293//phosphatase complex;GO:0044464//cell part;GO:0043231//intracellular membrane-bounded organelle;GO:0032991//macromolecular complex;GO:0005622//intracellular;GO:0043234//protein complex;GO:0043227//membrane-bounded organelle;GO:0008287//protein serine/threonine phosphatase complex;GO:1902494//catalytic c…	-	GO:0043086//negative regulation of catalytic activity;GO:0010921//regulation of phosphatase activity;GO:0032269//negative regulation of cellular protein metabolic process;GO:0044092//negative regulation of molecular function;GO:0050790//regulation of catalytic activity;GO:0051246//regulation of protein metabolic process;GO:0019222//regulation of metabolic process;GO:0035304//regulation of protein…
miR395-y	Unigene0006518	GDCSP	1390	4	2	0.004	3	3	PREDICTED: glycine dehydrogenase (decarboxylating), mitochondrial [Nelumbo nucifera]	-	-	-
miR395-y	Unigene0029181	At4g17486	789	4.5	2	0.004	2	2	PREDICTED: desumoylating isopeptidase 2-like [Nelumbo nucifera]	-	-	-
miR395-y	Unigene0108475	EID1	477	4.5	2	0.004	8	8	PREDICTED: phytochrome A-associated F-box protein-like [Nelumbo nucifera]	-	-	GO:0009987//cellular process;GO:0009416//response to light stimulus;GO:0009628//response to abiotic stimulus;GO:0044700//single organism signaling;GO:0044237//cellular metabolic process;GO:0044260//cellular macromolecule metabolic process;GO:0050789//regulation of biological process;GO:0043170//macromolecule metabolic process;GO:0023052//signaling;GO:0007275//multicellular organism development;GO…
miR395-y	Unigene0010483	HVA22A	44	3.5	2	0.004	2	2	HVA22-like protein a [Anthurium amnicola]	GO:0044425//membrane part;GO:0016020//membrane;GO:0031224//intrinsic component of membrane	-	-
miR395-y	Unigene0052006	AHL10	854	4	2	0.004	2	2	PREDICTED: AT-hook motif nuclear-localized protein 14 [Nelumbo nucifera]	-	-	-
miR395-y	Unigene0093519	At1g06620	319	4.5	2	0.004	2	2	PREDICTED: 1-aminocyclopropane-1-carboxylate oxidase homolog 4-like [Nelumbo nucifera]	-	-	-
miR395-y	Unigene0063475	CAF1-7	907	4.5	2	0.004	2	2	PREDICTED: probable CCR4-associated factor 1 homolog 7 [Nelumbo nucifera]	GO:0043231//intracellular membrane-bounded organelle;GO:0043227//membrane-bounded organelle;GO:0043229//intracellular organelle;GO:0044464//cell part;GO:0043226//organelle;GO:0005622//intracellular;GO:0005623//cell;GO:0044424//intracellular part	GO:0003824//catalytic activity;GO:0016787//hydrolase activity;GO:0004518//nuclease activity;GO:0000175//3'-5'-exoribonuclease activity;GO:0004540//ribonuclease activity;GO:0016788//hydrolase activity, acting on ester bonds;GO:0004527//exonuclease activity;GO:0008408//3'-5' exonuclease activity;GO:0004532//exoribonuclease activity;GO:0016796//exonuclease activity, active with either ribo- or deoxy…	GO:0090305//nucleic acid phosphodiester bond hydrolysis;GO:0034641//cellular nitrogen compound metabolic process;GO:0044260//cellular macromolecule metabolic process;GO:0008152//metabolic process;GO:0090501//RNA phosphodiester bond hydrolysis;GO:0090304//nucleic acid metabolic process;GO:0043170//macromolecule metabolic process;GO:0016070//RNA metabolic process;GO:0006807//nitrogen compound metab…
miR395-y	Unigene0098188	-	472	4	2	0.004	2	2	protein DELETION OF SUV3 SUPPRESSOR 1(I) [Ananas comosus]	-	-	-
miR395-y	Unigene0006057	Alg13	536	4.5	2	0.004	3	3	PREDICTED: UDP-N-acetylglucosamine transferase subunit ALG13 homolog isoform X1 [Elaeis guineensis]	-	GO:0005488//binding;GO:0016757//transferase activity, transferring glycosyl groups;GO:0003824//catalytic activity;GO:0016740//transferase activity	GO:0006629//lipid metabolic process;GO:0044255//cellular lipid metabolic process;GO:0044763//single-organism cellular process;GO:0030258//lipid modification;GO:0071704//organic substance metabolic process;GO:0008152//metabolic process;GO:0044699//single-organism process;GO:0044237//cellular metabolic process;GO:0044238//primary metabolic process;GO:0044710//single-organism metabolic process;GO:00…
miR395-y	Unigene0089795	MT2	23	4	2	0.004	93	93	metallothionein-like protein type 3 [Ananas comosus]	-	-	GO:0048518//positive regulation of biological process;GO:0044767//single-organism developmental process;GO:0008104//protein localization;GO:0032535//regulation of cellular component size;GO:0055065//metal ion homeostasis;GO:0009987//cellular process;GO:0044707//single-multicellular organism process;GO:0050801//ion homeostasis;GO:0032502//developmental process;GO:0050794//regulation of cellular pr…
miR395-y	Unigene0014010	GAMMACAL2	374	3.5	2	0.004	2	1	PREDICTED: gamma carbonic anhydrase-like 2, mitochondrial [Nelumbo nucifera]	-	-	-
miR395-y	Unigene0088485	-	468	4	2	0.004	2	2	Senescence regulator [Cynara cardunculus var. scolymus] [Cynara cardunculus]	-	-	-
miR395-y	Unigene0060158	BRM	1571	4.5	2	0.004	3	3	PREDICTED: ATP-dependent helicase BRM-like isoform X1 [Nelumbo nucifera]	GO:0044424//intracellular part;GO:0005622//intracellular;GO:0044464//cell part;GO:0005623//cell	GO:0003824//catalytic activity;GO:1901363//heterocyclic compound binding;GO:0016817//hydrolase activity, acting on acid anhydrides;GO:0097159//organic cyclic compound binding;GO:0005488//binding;GO:0016818//hydrolase activity, acting on acid anhydrides, in phosphorus-containing anhydrides;GO:0003676//nucleic acid binding;GO:0016787//hydrolase activity	GO:0034645//cellular macromolecule biosynthetic process;GO:0016043//cellular component organization;GO:0043170//macromolecule metabolic process;GO:0071704//organic substance metabolic process;GO:0065007//biological regulation;GO:0009059//macromolecule biosynthetic process;GO:0051276//chromosome organization;GO:0043933//macromolecular complex subunit organization;GO:0060255//regulation of macromol…
miR395-y	Unigene0104220	Znf385d	1338	4.5	2	0.004	3	3	PREDICTED: zinc finger protein 346-like isoform X2 [Juglans regia]	-	-	-
miR395-y	Unigene0045945	At1g05000	324	3	2	0.004	2	2	PREDICTED: probable tyrosine-protein phosphatase At1g05000 [Nelumbo nucifera]	-	GO:0016788//hydrolase activity, acting on ester bonds;GO:0003824//catalytic activity;GO:0016787//hydrolase activity;GO:0042578//phosphoric ester hydrolase activity	GO:0043170//macromolecule metabolic process;GO:0009987//cellular process;GO:0008152//metabolic process;GO:0044238//primary metabolic process;GO:0044260//cellular macromolecule metabolic process;GO:0016311//dephosphorylation;GO:0006470//protein dephosphorylation;GO:0019538//protein metabolic process;GO:0071704//organic substance metabolic process;GO:0044267//cellular protein metabolic process;GO:0…
miR395-y	Unigene0065993	-	782	4.5	2	0.004	3	3	histone-lysine N-methyltransferase [Arabidopsis thaliana]	GO:0005737//cytoplasm;GO:0044424//intracellular part;GO:0044444//cytoplasmic part;GO:0005622//intracellular;GO:0044464//cell part;GO:0005623//cell	-	-
miR395-y	Unigene0082588	DRP3A	1946	4	2	0.004	2	2	Dynamin-related protein 3A, partial [Anthurium amnicola]	-	GO:0005488//binding;GO:0001883//purine nucleoside binding;GO:0016818//hydrolase activity, acting on acid anhydrides, in phosphorus-containing anhydrides;GO:0003824//catalytic activity;GO:0097159//organic cyclic compound binding;GO:0017111//nucleoside-triphosphatase activity;GO:0036094//small molecule binding;GO:0016817//hydrolase activity, acting on acid anhydrides;GO:1901363//heterocyclic compou…	-
miR395-y	Unigene0082761	AUL1	1431	4	2	0.004	7	7	PREDICTED: auxilin-like protein 1 [Nelumbo nucifera]	-	-	-
miR395-y	Unigene0038384	FRS5	351	4.5	2	0.004	2	1	PREDICTED: protein FAR1-RELATED SEQUENCE 7 [Beta vulgaris subsp. vulgaris] [Beta vulgaris]	-	-	-
miR395-y	Unigene0041188	CBLL1	1294	4.5	2	0.004	3	3	PREDICTED: E3 ubiquitin-protein ligase Hakai [Nelumbo nucifera]	-	-	-
miR395-y	Unigene0073108	Os11g0472000	1901	4.5	2	0.004	3	3	PREDICTED: zinc finger CCCH domain-containing protein ZFN-like isoform X1 [Elaeis guineensis]	-	-	-
miR395-y	Unigene0103776	RPL7B	699	4	2	0.004	7	7	PREDICTED: 60S ribosomal protein L7-2-like [Nelumbo nucifera]	GO:0032991//macromolecular complex	-	-
miR395-y	Unigene0093478	Polr1d	114	4.5	2	0.004	4	4	PREDICTED: DNA-directed RNA polymerases I and III subunit RPAC2-like [Prunus mume]	GO:0043227//membrane-bounded organelle;GO:0005623//cell;GO:0043229//intracellular organelle;GO:0044424//intracellular part;GO:0044446//intracellular organelle part;GO:0070013//intracellular organelle lumen;GO:0005654//nucleoplasm;GO:0043231//intracellular membrane-bounded organelle;GO:0005634//nucleus;GO:0031974//membrane-enclosed lumen;GO:0044451//nucleoplasm part;GO:0044422//organelle part;GO:0…	GO:0016779//nucleotidyltransferase activity;GO:0005515//protein binding;GO:0034062//RNA polymerase activity;GO:0003824//catalytic activity;GO:0016772//transferase activity, transferring phosphorus-containing groups;GO:0016740//transferase activity;GO:0005488//binding	GO:0009987//cellular process;GO:0043170//macromolecule metabolic process;GO:1901576//organic substance biosynthetic process;GO:0044249//cellular biosynthetic process;GO:0071704//organic substance metabolic process;GO:0044260//cellular macromolecule metabolic process;GO:0009059//macromolecule biosynthetic process;GO:0034645//cellular macromolecule biosynthetic process;GO:0008152//metabolic process…
miR395-y	Unigene0049993	At4g18820	3716	4.5	2	0.004	2	2	PREDICTED: protein STICHEL-like 3 isoform X1 [Nelumbo nucifera]	-	-	-
miR395-y	Unigene0053491	PRS3	430	4.5	2	0.004	3	3	PREDICTED: ribose-phosphate pyrophosphokinase 4 isoform X1 [Nelumbo nucifera]	-	-	-
miR395-y	Unigene0026753	Snd1	1419	4.5	2	0.004	6	6	PREDICTED: staphylococcal nuclease domain-containing protein 1 [Nelumbo nucifera]	-	-	GO:0065007//biological regulation;GO:0009987//cellular process;GO:0060255//regulation of macromolecule metabolic process;GO:0010605//negative regulation of macromolecule metabolic process;GO:0016458//gene silencing;GO:0010468//regulation of gene expression;GO:0010629//negative regulation of gene expression;GO:0044763//single-organism cellular process;GO:0019222//regulation of metabolic process;GO…
miR5179-x	Unigene0057368	PAB2	2068	4.5	2	0.006	5	5	PREDICTED: polyadenylate-binding protein 2 [Amborella trichopoda]	GO:0043231//intracellular membrane-bounded organelle;GO:0043229//intracellular organelle;GO:0044424//intracellular part;GO:0005623//cell;GO:0043226//organelle;GO:0044444//cytoplasmic part;GO:0043227//membrane-bounded organelle;GO:0044464//cell part;GO:0005622//intracellular;GO:0005737//cytoplasm	GO:0003676//nucleic acid binding;GO:0097159//organic cyclic compound binding;GO:0005488//binding;GO:1901363//heterocyclic compound binding	GO:0019222//regulation of metabolic process;GO:0044764//multi-organism cellular process;GO:0009987//cellular process;GO:0050789//regulation of biological process;GO:0051704//multi-organism process;GO:0065007//biological regulation;GO:0044419//interspecies interaction between organisms;GO:0016032//viral process;GO:0044403//symbiosis, encompassing mutualism through parasitism;GO:0010608//posttransc…
miR5179-x	Unigene0021703	GRXC1	102	4	2	0.006	14	14	glutaredoxin, partial [Chimonanthus praecox]	-	GO:0016491//oxidoreductase activity;GO:0016667//oxidoreductase activity, acting on a sulfur group of donors;GO:0003824//catalytic activity;GO:0015036//disulfide oxidoreductase activity	GO:0042592//homeostatic process;GO:0044763//single-organism cellular process;GO:0065008//regulation of biological quality;GO:0019725//cellular homeostasis;GO:0044699//single-organism process;GO:0008152//metabolic process;GO:0065007//biological regulation;GO:0044710//single-organism metabolic process;GO:0009987//cellular process
miR5179-x	Unigene0016486	TCP11	449	4.5	2	0.006	3	3	T-complex protein 11-like protein 1 [Ananas comosus]	-	-	-
miR5179-x	Unigene0044971	-	1089	4.5	2	0.006	6	6	--	-	-	-
miR5179-x	Unigene0111985	At5g41670	1105	4.5	2	0.006	14	14	PREDICTED: 6-phosphogluconate dehydrogenase, decarboxylating 1, chloroplastic isoform X1 [Citrus sinensis]	-	GO:0097159//organic cyclic compound binding;GO:0048037//cofactor binding;GO:1901265//nucleoside phosphate binding;GO:0000166//nucleotide binding;GO:0016614//oxidoreductase activity, acting on CH-OH group of donors;GO:0005488//binding;GO:0016491//oxidoreductase activity;GO:1901363//heterocyclic compound binding;GO:0003824//catalytic activity;GO:0036094//small molecule binding	GO:1901564//organonitrogen compound metabolic process;GO:0006807//nitrogen compound metabolic process;GO:0055086//nucleobase-containing small molecule metabolic process;GO:0019362//pyridine nucleotide metabolic process;GO:0006725//cellular aromatic compound metabolic process;GO:0006793//phosphorus metabolic process;GO:0044281//small molecule metabolic process;GO:0044710//single-organism metabolic…
miR5179-x	Unigene0072886	ZEP	470	3	2	0.006	2	1	PREDICTED: zeaxanthin epoxidase, chloroplastic isoform X1 [Nelumbo nucifera]	-	-	-
miR5179-x	Unigene0071952	HUA1	914	3.5	2	0.006	2	2	PREDICTED: zinc finger CCCH domain-containing protein 37 isoform X1 [Nelumbo nucifera]	-	-	-
miR5179-x	Unigene0072884	ZEP	1151	3	2	0.006	2	1	PREDICTED: zeaxanthin epoxidase, chloroplastic isoform X1 [Nelumbo nucifera]	-	-	-
miR6293-x	Unigene0054017	Os05g0428700	1944	4	2	0.002	7	7	PREDICTED: potassium channel AKT2 [Elaeis guineensis]	GO:0016020//membrane	-	GO:0009987//cellular process;GO:0044763//single-organism cellular process;GO:0006810//transport;GO:0055085//transmembrane transport;GO:0006811//ion transport;GO:1902578//single-organism localization;GO:0051179//localization;GO:0034220//ion transmembrane transport;GO:0051234//establishment of localization;GO:0044699//single-organism process;GO:0044765//single-organism transport;GO:0030001//metal i…
miR6293-x	Unigene0046875	ALATS	1235	4.5	2	0.002	4	4	PREDICTED: alanine--tRNA ligase [Nelumbo nucifera]	GO:0005623//cell;GO:0044464//cell part;GO:0044424//intracellular part;GO:0043226//organelle;GO:0043227//membrane-bounded organelle;GO:0005622//intracellular;GO:0043229//intracellular organelle;GO:0043231//intracellular membrane-bounded organelle	GO:0046872//metal ion binding;GO:0016876//ligase activity, forming aminoacyl-tRNA and related compounds;GO:0005488//binding;GO:0036094//small molecule binding;GO:0032549//ribonucleoside binding;GO:0016874//ligase activity;GO:0004812//aminoacyl-tRNA ligase activity;GO:0046914//transition metal ion binding;GO:0003824//catalytic activity;GO:0001882//nucleoside binding;GO:0043167//ion binding;GO:0032…	GO:0006725//cellular aromatic compound metabolic process;GO:0006520//cellular amino acid metabolic process;GO:0010467//gene expression;GO:0006418//tRNA aminoacylation for protein translation;GO:0034645//cellular macromolecule biosynthetic process;GO:0071704//organic substance metabolic process;GO:0043603//cellular amide metabolic process;GO:0043039//tRNA aminoacylation;GO:0034641//cellular nitrog…
miR6293-x	Unigene0079903	DTXL3	1243	4.5	2	0.002	6	6	PREDICTED: protein DETOXIFICATION 12-like [Phoenix dactylifera]	-	-	-
miR6293-x	Unigene0039784	CYP19-4	220	4	2	0.002	8	4	PREDICTED: peptidyl-prolyl cis-trans isomerase CYP20-1-like isoform X3 [Nelumbo nucifera]	-	-	-
miR6293-x	Unigene0029947	GBP2	1609	4	2	0.002	7	3.5	PREDICTED: guanylate-binding protein 1-like [Nelumbo nucifera]	GO:0043229//intracellular organelle;GO:0044464//cell part;GO:0043232//intracellular non-membrane-bounded organelle;GO:0009536//plastid;GO:0043227//membrane-bounded organelle;GO:0005623//cell;GO:0043226//organelle;GO:0044444//cytoplasmic part;GO:0005737//cytoplasm;GO:0044424//intracellular part;GO:0043228//non-membrane-bounded organelle;GO:0005622//intracellular;GO:0043231//intracellular membrane-…	GO:0036094//small molecule binding;GO:0017111//nucleoside-triphosphatase activity;GO:0097367//carbohydrate derivative binding;GO:0016462//pyrophosphatase activity;GO:0001883//purine nucleoside binding;GO:0016787//hydrolase activity;GO:0097159//organic cyclic compound binding;GO:0001882//nucleoside binding;GO:0016818//hydrolase activity, acting on acid anhydrides, in phosphorus-containing anhydrid…	GO:0009987//cellular process;GO:0007017//microtubule-based process;GO:1902410//mitotic cytokinetic process;GO:0000281//mitotic cytokinesis;GO:0007049//cell cycle;GO:0044763//single-organism cellular process;GO:0044699//single-organism process;GO:0022402//cell cycle process;GO:0051301//cell division;GO:0061640//cytoskeleton-dependent cytokinesis;GO:0000278//mitotic cell cycle;GO:1903047//mitotic c…
miR6293-x	Unigene0010239	-	864	4.5	2	0.002	3	1.5	PREDICTED: protein IQ-DOMAIN 1-like [Elaeis guineensis]	-	-	-
miR6293-x	Unigene0029946	GBP2	516	4	2	0.002	7	3.5	PREDICTED: guanylate-binding protein 1-like [Nelumbo nucifera]	-	-	-
miR6293-x	Unigene0003155	DBP	79	4	2	0.002	2	2	PREDICTED: remorin [Oryza sativa Japonica Group]	-	-	-
miR6293-x	Unigene0058253	SPCC24B10.10c	354	4.5	2	0.002	2	2	PREDICTED: nuclear valosin-containing protein-like [Juglans regia]	-	GO:0003824//catalytic activity;GO:0032550//purine ribonucleoside binding;GO:0036094//small molecule binding;GO:0097159//organic cyclic compound binding;GO:0097367//carbohydrate derivative binding;GO:0001882//nucleoside binding;GO:1901363//heterocyclic compound binding;GO:0001883//purine nucleoside binding;GO:0032549//ribonucleoside binding;GO:0005488//binding	-
miR6293-x	Unigene0055833	ERD15	331	4.5	2	0.002	9	9	PREDICTED: protein EARLY RESPONSIVE TO DEHYDRATION 15-like [Phoenix dactylifera]	-	-	-
miR6293-x	Unigene0067780	AGD12	371	4	2	0.002	2	1	PREDICTED: probable ADP-ribosylation factor GTPase-activating protein AGD13 isoform X2 [Eucalyptus grandis]	-	-	-
miR6293-x	Unigene0061797	-	687	4.5	2	0.002	2	2	Aminomethyl 32 [Prunus persica var. persica] [Prunus persica]	GO:0005737//cytoplasm;GO:0044464//cell part;GO:0044446//intracellular organelle part;GO:0005623//cell;GO:0043226//organelle;GO:0044424//intracellular part;GO:0005622//intracellular;GO:0044429//mitochondrial part;GO:0044422//organelle part;GO:0043231//intracellular membrane-bounded organelle;GO:0043229//intracellular organelle;GO:0005739//mitochondrion;GO:0043227//membrane-bounded organelle;GO:004…	-	GO:0006082//organic acid metabolic process;GO:0032787//monocarboxylic acid metabolic process;GO:0071704//organic substance metabolic process;GO:0008152//metabolic process;GO:0006520//cellular amino acid metabolic process;GO:0009069//serine family amino acid metabolic process;GO:1901615//organic hydroxy compound metabolic process;GO:0019752//carboxylic acid metabolic process;GO:0044281//small mole…
miR6293-x	Unigene0067778	AGD12	371	4	2	0.002	2	1	ARF-GAP domain 13 isoform 3 [Theobroma cacao]	GO:0043226//organelle;GO:0044464//cell part;GO:0043227//membrane-bounded organelle;GO:0016020//membrane;GO:0043231//intracellular membrane-bounded organelle;GO:0005622//intracellular;GO:0043229//intracellular organelle;GO:0005623//cell;GO:0044424//intracellular part	GO:0008289//lipid binding;GO:0046914//transition metal ion binding;GO:0046872//metal ion binding;GO:0005488//binding;GO:0043169//cation binding;GO:0043167//ion binding	GO:0071702//organic substance transport;GO:0032502//developmental process;GO:0009987//cellular process;GO:1902578//single-organism localization;GO:0045184//establishment of protein localization;GO:0044699//single-organism process;GO:0034613//cellular protein localization;GO:0051641//cellular localization;GO:0006886//intracellular protein transport;GO:0051649//establishment of localization in cell…
miR6293-x	Unigene0049198	TOR1	626	4.5	2	0.002	2	2	PREDICTED: microtubule-associated protein TORTIFOLIA1-like [Nelumbo nucifera]	-	-	-
miR6293-x	Unigene0067543	SCAR2	509	4	2	0.002	5	5	PREDICTED: protein SCAR2-like [Nelumbo nucifera]	-	-	-
miR6293-x	Unigene0007481	IP5P2	1956	4	2	0.002	2	2	PREDICTED: type I inositol polyphosphate 5-phosphatase 2 [Theobroma cacao]	-	GO:0042578//phosphoric ester hydrolase activity;GO:0016788//hydrolase activity, acting on ester bonds;GO:0052745//inositol phosphate phosphatase activity;GO:0003824//catalytic activity;GO:0016791//phosphatase activity;GO:0016787//hydrolase activity	GO:0001101//response to acid chemical;GO:1901615//organic hydroxy compound metabolic process;GO:0051716//cellular response to stimulus;GO:0006793//phosphorus metabolic process;GO:0007154//cell communication;GO:0044281//small molecule metabolic process;GO:0071704//organic substance metabolic process;GO:0019637//organophosphate metabolic process;GO:0009719//response to endogenous stimulus;GO:005079…
miR6293-x	Unigene0039783	CYP19-4	567	4	2	0.002	8	4	PREDICTED: peptidyl-prolyl cis-trans isomerase CYP20-1 [Nicotiana sylvestris]	-	-	-
miR6293-x	Unigene0081734	TEB	846	4.5	2	0.002	2	2	PREDICTED: helicase and polymerase-containing protein TEBICHI isoform X1 [Nelumbo nucifera]	-	-	-
miR6293-x	Unigene0077908	Atad1	1365	4.5	2	0.002	2	2	AAA domain-containing protein/FHA domain-containing protein [Cephalotus follicularis]	-	GO:0003824//catalytic activity;GO:0016787//hydrolase activity	-
miR6293-x	Unigene0054987	AAPT1	1105	4.5	2	0.002	3	1	PREDICTED: choline/ethanolaminephosphotransferase 1 [Ziziphus jujuba]	-	GO:0016740//transferase activity;GO:0003824//catalytic activity;GO:0016772//transferase activity, transferring phosphorus-containing groups	-
miR6293-x	Unigene0049385	CYP80B2	671	4	2	0.002	10	10	PREDICTED: probable (S)-N-methylcoclaurine 3'-hydroxylase isozyme 2 [Populus euphratica]	-	GO:0016705//oxidoreductase activity, acting on paired donors, with incorporation or reduction of molecular oxygen;GO:0016491//oxidoreductase activity;GO:0043167//ion binding;GO:0005488//binding;GO:0003824//catalytic activity;GO:0046872//metal ion binding;GO:0043169//cation binding	-
miR6293-x	Unigene0068905	UBA2	893	4	2	0.002	3	3	PREDICTED: ubiquitin-activating enzyme E1 1-like [Phoenix dactylifera]	-	-	-
miR6293-x	Unigene0057452	TOM2A	410	3	2	0.002	3	3	PREDICTED: tobamovirus multiplication protein 2A-like [Nelumbo nucifera]	-	-	-
miR6293-x	Unigene0104401	TPIP1	523	3.5	2	0.002	7	7	PREDICTED: triosephosphate isomerase, cytosolic [Prunus mume]	-	-	-
miR6293-x	Unigene0096654	At1g09380	282	4.5	2	0.002	7	7	PREDICTED: WAT1-related protein At1g09380-like [Musa acuminata subsp. malaccensis] [Musa acuminata]	-	-	-
miR6293-x	Unigene0068370	At1g03560	326	4	2	0.002	3	3	PREDICTED: pentatricopeptide repeat-containing protein At1g03560, mitochondrial [Nelumbo nucifera]	-	-	-
miR6293-x	Unigene0065040	CNX1	782	4	2	0.002	16	16	PREDICTED: calnexin homolog [Elaeis guineensis]	GO:0043226//organelle;GO:0005623//cell;GO:0005622//intracellular;GO:0043231//intracellular membrane-bounded organelle;GO:0044424//intracellular part;GO:0044464//cell part;GO:0043229//intracellular organelle;GO:0043227//membrane-bounded organelle	GO:0005515//protein binding;GO:0005488//binding	GO:0071704//organic substance metabolic process;GO:0009987//cellular process;GO:0044237//cellular metabolic process;GO:0044267//cellular protein metabolic process;GO:0043170//macromolecule metabolic process;GO:0019538//protein metabolic process;GO:0008152//metabolic process;GO:0044260//cellular macromolecule metabolic process;GO:0044238//primary metabolic process
miR6293-x	Unigene0009052	NUB1	1355	4	2	0.002	4	4	PREDICTED: NEDD8 ultimate buster 1 [Nelumbo nucifera]	-	-	-
miR6293-x	Unigene0067543	SCAR2	3156	4.5	2	0.002	3	3	PREDICTED: protein SCAR2-like [Nelumbo nucifera]	-	-	-
miR6293-x	Unigene0068802	NOP5-2	225	3.5	2	0.002	5	5	PREDICTED: probable nucleolar protein 5-2 isoform X2 [Nelumbo nucifera]	-	-	-
miR6293-x	Unigene0047814	-	291	3.5	2	0.002	7	7	--	-	-	-
miR6293-x	Unigene0048444	NSF	429	4	2	0.002	9	9	PREDICTED: vesicle-fusing ATPase-like isoform X1 [Elaeis guineensis]	-	-	-
miR6293-x	Unigene0067127	DCL4	568	3.5	2	0.002	7	3.5	PREDICTED: endoribonuclease Dicer homolog 4 isoform X2 [Elaeis guineensis]	-	GO:0004518//nuclease activity;GO:0016787//hydrolase activity;GO:0016788//hydrolase activity, acting on ester bonds;GO:0004519//endonuclease activity;GO:0005488//binding;GO:1901363//heterocyclic compound binding;GO:0097159//organic cyclic compound binding;GO:0003824//catalytic activity	GO:0006355//regulation of transcription, DNA-templated;GO:0070887//cellular response to chemical stimulus;GO:0050794//regulation of cellular process;GO:0010629//negative regulation of gene expression;GO:0044707//single-multicellular organism process;GO:0040029//regulation of gene expression, epigenetic;GO:0031326//regulation of cellular biosynthetic process;GO:0044237//cellular metabolic process;…
miR6293-x	Unigene0046608	IQD32	864	4.5	2	0.002	3	1.5	PREDICTED: protein IQ-DOMAIN 14-like [Nelumbo nucifera]	-	-	-
miR6293-x	Unigene0108071	TKRP125	1929	4	2	0.002	4	4	PREDICTED: kinesin-like protein KIN-5D isoform X2 [Nelumbo nucifera]	GO:0005856//cytoskeleton;GO:0044446//intracellular organelle part;GO:0043228//non-membrane-bounded organelle;GO:0005623//cell;GO:0005875//microtubule associated complex;GO:0044422//organelle part;GO:0043232//intracellular non-membrane-bounded organelle;GO:0015630//microtubule cytoskeleton;GO:0032991//macromolecular complex;GO:0043226//organelle;GO:0043234//protein complex;GO:0044424//intracellula…	GO:0001882//nucleoside binding;GO:0036094//small molecule binding;GO:0015631//tubulin binding;GO:0016817//hydrolase activity, acting on acid anhydrides;GO:0032549//ribonucleoside binding;GO:1901363//heterocyclic compound binding;GO:0003824//catalytic activity;GO:0005515//protein binding;GO:0008092//cytoskeletal protein binding;GO:0016818//hydrolase activity, acting on acid anhydrides, in phosphor…	GO:0007017//microtubule-based process;GO:0016043//cellular component organization;GO:0009987//cellular process;GO:0044699//single-organism process;GO:0071840//cellular component organization or biogenesis;GO:0044763//single-organism cellular process;GO:0007010//cytoskeleton organization;GO:1902589//single-organism organelle organization;GO:0000226//microtubule cytoskeleton organization;GO:0006996…
miR6293-x	Unigene0067404	-	1186	4	2	0.002	2	2	--	-	-	-
miR6293-x	Unigene0067483	TAF2	3522	4	2	0.002	2	2	PREDICTED: transcription initiation factor TFIID subunit 2 isoform X1 [Nelumbo nucifera]	-	-	-
miR6293-x	Unigene0008908	At4g13360	566	4	2	0.002	2	2	PREDICTED: 3-hydroxyisobutyryl-CoA hydrolase-like protein 3, mitochondrial [Amborella trichopoda]	-	-	-
miR6293-x	Unigene0067512	TOM2A	434	3.5	2	0.002	4	4	PREDICTED: tobamovirus multiplication protein 2A-like [Nelumbo nucifera]	-	-	-
miR6293-x	Unigene0067126	DCL4	2127	3.5	2	0.002	7	3.5	PREDICTED: endoribonuclease Dicer homolog 4 isoform X2 [Elaeis guineensis]	-	GO:1901363//heterocyclic compound binding;GO:0097159//organic cyclic compound binding;GO:0005488//binding;GO:0016788//hydrolase activity, acting on ester bonds;GO:0016787//hydrolase activity;GO:0003824//catalytic activity;GO:0004519//endonuclease activity;GO:0004518//nuclease activity	GO:0008152//metabolic process;GO:0090305//nucleic acid phosphodiester bond hydrolysis;GO:0019219//regulation of nucleobase-containing compound metabolic process;GO:0048856//anatomical structure development;GO:0035194//posttranscriptional gene silencing by RNA;GO:0050789//regulation of biological process;GO:0071704//organic substance metabolic process;GO:0016246//RNA interference;GO:0010556//regul…
miR6293-x	Unigene0054988	AAPT1	1922	4.5	2	0.002	3	1	PREDICTED: choline/ethanolaminephosphotransferase 1 isoform X2 [Elaeis guineensis]	-	GO:0003824//catalytic activity;GO:0016740//transferase activity;GO:0016772//transferase activity, transferring phosphorus-containing groups	-
miR6293-x	Unigene0025953	RPN7	1023	4.5	2	0.002	8	8	PREDICTED: 26S proteasome non-ATPase regulatory subunit 6 homolog [Pyrus x bretschneideri]	-	-	-
miR6293-x	Unigene0054989	AAPT1	966	4.5	2	0.002	3	1	PREDICTED: choline/ethanolaminephosphotransferase 1 isoform X2 [Elaeis guineensis]	-	GO:0016740//transferase activity;GO:0003824//catalytic activity;GO:0016772//transferase activity, transferring phosphorus-containing groups	-
miR6293-x	Unigene0088474	At4g23740	1395	4.5	2	0.002	4	4	PREDICTED: probable inactive receptor kinase At4g23740 [Nelumbo nucifera]	GO:0044425//membrane part;GO:0031224//intrinsic component of membrane;GO:0016020//membrane	GO:0003824//catalytic activity;GO:0005488//binding;GO:0097159//organic cyclic compound binding;GO:0016740//transferase activity;GO:0036094//small molecule binding;GO:0016772//transferase activity, transferring phosphorus-containing groups;GO:0016301//kinase activity;GO:0001882//nucleoside binding;GO:0001883//purine nucleoside binding;GO:0097367//carbohydrate derivative binding;GO:1901363//heteroc…	GO:0006464//cellular protein modification process;GO:0008152//metabolic process;GO:0048509//regulation of meristem development;GO:0043170//macromolecule metabolic process;GO:0050789//regulation of biological process;GO:0019538//protein metabolic process;GO:0065007//biological regulation;GO:0050793//regulation of developmental process;GO:0071704//organic substance metabolic process;GO:0044267//cel…
miR6293-x	Unigene0080114	EDR2	217	4	2	0.002	2	2	PREDICTED: protein ENHANCED DISEASE RESISTANCE 2-like isoform X1 [Phoenix dactylifera]	GO:0016020//membrane	GO:0005488//binding	GO:0009058//biosynthetic process;GO:0009987//cellular process;GO:0008152//metabolic process;GO:0019752//carboxylic acid metabolic process;GO:0044763//single-organism cellular process;GO:0046394//carboxylic acid biosynthetic process;GO:0006790//sulfur compound metabolic process;GO:0044249//cellular biosynthetic process;GO:0000097//sulfur amino acid biosynthetic process;GO:0000096//sulfur amino aci…
miR6293-x	Unigene0032867	At5g14770	597	4.5	2	0.002	4	4	PREDICTED: pentatricopeptide repeat-containing protein At5g14770, mitochondrial [Phoenix dactylifera]	-	-	-
miR6293-x	Unigene0101391	-	557	4	0	0	21	21	--	-	-	-
miR9566-y	Unigene0030445	CYP40	687	4.5	2	0.002	2	2	PREDICTED: peptidyl-prolyl cis-trans isomerase CYP40 [Nelumbo nucifera]	-	GO:0003824//catalytic activity;GO:0016859//cis-trans isomerase activity;GO:0016853//isomerase activity	GO:0071704//organic substance metabolic process;GO:0044267//cellular protein metabolic process;GO:0008152//metabolic process;GO:0019538//protein metabolic process;GO:0044237//cellular metabolic process;GO:0043170//macromolecule metabolic process;GO:0044260//cellular macromolecule metabolic process;GO:0009987//cellular process;GO:0044238//primary metabolic process
miR9566-y	Unigene0006122	PREP1	2664	4.5	2	0.002	4	4	PREDICTED: presequence protease 2, chloroplastic/mitochondrial [Nelumbo nucifera]	-	-	-
miR9566-y	Unigene0069473	TIR1	3061	4	2	0.002	2	2	PREDICTED: protein TRANSPORT INHIBITOR RESPONSE 1-like [Phoenix dactylifera]	-	-	GO:0010033//response to organic substance;GO:0009719//response to endogenous stimulus;GO:0070887//cellular response to chemical stimulus;GO:0023052//signaling;GO:0042221//response to chemical;GO:0050789//regulation of biological process;GO:0044763//single-organism cellular process;GO:0007154//cell communication;GO:0044699//single-organism process;GO:0050896//response to stimulus;GO:0044700//singl…
miR9566-y	Unigene0072407	BHLH49	325	4.5	2	0.002	2	2	PREDICTED: transcription factor bHLH49 [Nelumbo nucifera]	-	-	-
miR9566-y	Unigene0053515	-	114	4	2	0.002	3	1.5	--	-	-	-
miR9566-y	Unigene0070815	PERK10	632	4.5	2	0.002	8	8	PREDICTED: proline-rich receptor-like protein kinase PERK8 [Nelumbo nucifera]	GO:0016020//membrane	GO:0004672//protein kinase activity;GO:0032550//purine ribonucleoside binding;GO:0003824//catalytic activity;GO:0016772//transferase activity, transferring phosphorus-containing groups;GO:0036094//small molecule binding;GO:0005488//binding;GO:0016301//kinase activity;GO:1901363//heterocyclic compound binding;GO:0097159//organic cyclic compound binding;GO:0001883//purine nucleoside binding;GO:0016…	GO:0036211//protein modification process;GO:0006464//cellular protein modification process;GO:0019538//protein metabolic process;GO:0009987//cellular process;GO:0044260//cellular macromolecule metabolic process;GO:0006793//phosphorus metabolic process;GO:0044267//cellular protein metabolic process;GO:0044237//cellular metabolic process;GO:0043170//macromolecule metabolic process;GO:0006796//phosp…
miR9566-y	Unigene0084212	SBT2.5	625	4.5	2	0.002	3	3	PREDICTED: subtilisin-like protease SBT2.5 isoform X2 [Vitis vinifera]	GO:0005623//cell;GO:0030312//external encapsulating structure;GO:0044464//cell part;GO:0071944//cell periphery	GO:0003824//catalytic activity;GO:0016787//hydrolase activity;GO:0070011//peptidase activity, acting on L-amino acid peptides;GO:0008233//peptidase activity	GO:0043170//macromolecule metabolic process;GO:0008152//metabolic process;GO:0019538//protein metabolic process;GO:0044238//primary metabolic process;GO:0071704//organic substance metabolic process
miR9566-y	Unigene0072157	BGLU47	99	4.5	2	0.002	14	14	PREDICTED: beta-glucosidase 46-like [Citrus sinensis]	-	-	GO:0008152//metabolic process;GO:0044238//primary metabolic process
miR9566-y	Unigene0061635	AGPP	645	4.5	2	0.002	6	6	PREDICTED: glucose-1-phosphate adenylyltransferase small subunit, chloroplastic/amyloplastic [Phoenix dactylifera]	-	-	-
miR9566-y	Unigene0087888	DIT1	1021	4.5	2	0.002	2	2	PREDICTED: dicarboxylate transporter 1, chloroplastic [Phoenix dactylifera]	GO:0043231//intracellular membrane-bounded organelle;GO:0044422//organelle part;GO:0031975//envelope;GO:0009526//plastid envelope;GO:0044464//cell part;GO:0044444//cytoplasmic part;GO:0031976//plastid thylakoid;GO:0043229//intracellular organelle;GO:0009528//plastid inner membrane;GO:0031090//organelle membrane;GO:0044435//plastid part;GO:0009579//thylakoid;GO:0016020//membrane;GO:0031224//intrin…	GO:0022892//substrate-specific transporter activity;GO:0008514//organic anion transmembrane transporter activity;GO:0005310//dicarboxylic acid transmembrane transporter activity;GO:0046943//carboxylic acid transmembrane transporter activity;GO:0015075//ion transmembrane transporter activity;GO:0005215//transporter activity;GO:0022891//substrate-specific transmembrane transporter activity;GO:00053…	GO:1901605//alpha-amino acid metabolic process;GO:0006970//response to osmotic stress;GO:1901576//organic substance biosynthetic process;GO:0006082//organic acid metabolic process;GO:0015740//C4-dicarboxylate transport;GO:0071702//organic substance transport;GO:0006807//nitrogen compound metabolic process;GO:0044710//single-organism metabolic process;GO:0071554//cell wall organization or biogenes…
miR9566-y	Unigene0068087	-	804	4.5	2	0.002	2	2	--	-	-	-
miR9566-y	Unigene0055770	-	1146	3.5	2	0.002	2	2	--	-	-	-
miR9566-y	Unigene0038177	CS	241	4.5	2	0.002	4	4	PREDICTED: citrate synthase, mitochondrial [Jatropha curcas]	-	GO:0003824//catalytic activity;GO:0016746//transferase activity, transferring acyl groups;GO:0016740//transferase activity	GO:0009987//cellular process;GO:0044699//single-organism process;GO:0019752//carboxylic acid metabolic process;GO:0006082//organic acid metabolic process;GO:0072350//tricarboxylic acid metabolic process;GO:0044763//single-organism cellular process;GO:0044237//cellular metabolic process;GO:0008152//metabolic process;GO:0006101//citrate metabolic process;GO:0044281//small molecule metabolic process…
miR9566-y	Unigene0000265	TIC62	776	4	2	0.002	2	2	PREDICTED: protein TIC 62, chloroplastic isoform X2 [Vitis vinifera]	-	-	-
miR9566-y	Unigene0011283	CER1	1056	4	2	0.002	8	8	protein ECERIFERUM 1 isoform X2 [Asparagus officinalis]	GO:0016020//membrane	-	GO:0044699//single-organism process;GO:0008152//metabolic process;GO:0044710//single-organism metabolic process
miR9566-y	Unigene0108308	LSM2	545	4	2	0.002	2	2	U6 snRNA-associated Sm-like protein LSm2, partial [Anthurium amnicola]	-	-	-
miR9566-y	Unigene0022520	FAM210B	261	4.5	2	0.002	6	6	Protein FAM210B, partial [Anthurium amnicola]	GO:0043227//membrane-bounded organelle;GO:0005737//cytoplasm;GO:0009507//chloroplast;GO:0043231//intracellular membrane-bounded organelle;GO:0044424//intracellular part;GO:0043229//intracellular organelle;GO:0044464//cell part;GO:0044444//cytoplasmic part;GO:0009536//plastid;GO:0043226//organelle;GO:0005623//cell;GO:0005622//intracellular	-	GO:0044767//single-organism developmental process;GO:0009987//cellular process;GO:0032502//developmental process;GO:0044699//single-organism process
miR9566-y	Unigene0011666	-	3561	3.5	2	0.002	2	2	Chromodomain-helicase-DNA-binding protein Mi-2, partial [Anthurium amnicola]	-	-	-
miR9566-y	Unigene0110138	Kmt2b	946	4.5	2	0.002	5	5	PREDICTED: uncharacterized protein LOC100249974 isoform X3 [Vitis vinifera]	-	-	-
miR9566-y	Unigene0007712	Ttc1	2614	4	2	0.002	2	2	receptor kinase [Populus tomentosa]	-	-	-
miR9566-y	Unigene0011478	PP2AB2	1481	4.5	2	0.002	2	2	PREDICTED: serine/threonine protein phosphatase 2A 55 kDa regulatory subunit B beta isoform-like isoform X1 [Gossypium raimondii]	-	-	-
miR9566-y	Unigene0111974	RPL6	658	4	2	0.002	5	5	PREDICTED: 60S ribosomal protein L6-2-like [Ziziphus jujuba]	-	-	-
miR9566-y	Unigene0071703	RIC2	600	4.5	2	0.002	3	3	ras-related protein RIC2 [Asparagus officinalis]	-	GO:0097367//carbohydrate derivative binding;GO:0032549//ribonucleoside binding;GO:0001883//purine nucleoside binding;GO:0097159//organic cyclic compound binding;GO:0003824//catalytic activity;GO:0036094//small molecule binding;GO:1901363//heterocyclic compound binding;GO:0032550//purine ribonucleoside binding;GO:0001882//nucleoside binding;GO:0005488//binding	GO:0051179//localization;GO:0044700//single organism signaling;GO:0035556//intracellular signal transduction;GO:0033036//macromolecule localization;GO:0050794//regulation of cellular process;GO:0050896//response to stimulus;GO:0009987//cellular process;GO:0007165//signal transduction;GO:0050789//regulation of biological process;GO:0008104//protein localization;GO:0044699//single-organism process;…
miR9566-y	Unigene0072476	PP2AB2	1099	4.5	2	0.002	3	3	PREDICTED: serine/threonine protein phosphatase 2A 55 kDa regulatory subunit B beta isoform-like isoform X1 [Gossypium arboreum]	-	GO:0030234//enzyme regulator activity;GO:0019888//protein phosphatase regulator activity;GO:0098772//molecular function regulator;GO:0019208//phosphatase regulator activity	GO:0065007//biological regulation;GO:0019222//regulation of metabolic process;GO:0050789//regulation of biological process;GO:0050794//regulation of cellular process
miR9566-y	Unigene0002921	-	2264	4	2	0.002	4	4	PREDICTED: uncharacterized protein LOC104593065 [Nelumbo nucifera]	-	-	-
miR9566-y	Unigene0108100	SS3	2763	4	2	0.002	2	2	PREDICTED: starch synthase 3, chloroplastic/amyloplastic [Vitis vinifera]	-	-	GO:0008152//metabolic process
miR9566-y	Unigene0045560	MDH1	1543	4.5	2	0.002	2	2	PREDICTED: malate dehydrogenase [NADP], chloroplastic-like [Nelumbo nucifera]	-	GO:0016615//malate dehydrogenase activity;GO:0016614//oxidoreductase activity, acting on CH-OH group of donors;GO:0003824//catalytic activity;GO:0016491//oxidoreductase activity	GO:0044238//primary metabolic process;GO:0006082//organic acid metabolic process;GO:0009987//cellular process;GO:0044763//single-organism cellular process;GO:0008152//metabolic process;GO:0043436//oxoacid metabolic process;GO:0044699//single-organism process;GO:0071704//organic substance metabolic process;GO:0044237//cellular metabolic process;GO:0044281//small molecule metabolic process;GO:00436…
miR9566-y	Unigene0031002	XCT	142	3	2	0.002	3	3	PREDICTED: protein XAP5 CIRCADIAN TIMEKEEPER isoform X2 [Nelumbo nucifera]	-	-	GO:0032502//developmental process;GO:0065008//regulation of biological quality;GO:0050793//regulation of developmental process;GO:0050794//regulation of cellular process;GO:0065007//biological regulation;GO:0044763//single-organism cellular process;GO:0050896//response to stimulus;GO:0009743//response to carbohydrate;GO:0010033//response to organic substance;GO:0009639//response to red or far red…
miR9566-y	Unigene0067864	Dhx36	3115	4	2	0.002	2	2	PREDICTED: DExH-box ATP-dependent RNA helicase DExH3 [Elaeis guineensis]	-	GO:0017111//nucleoside-triphosphatase activity;GO:0036094//small molecule binding;GO:0042623//ATPase activity, coupled;GO:0016462//pyrophosphatase activity;GO:0001882//nucleoside binding;GO:0016787//hydrolase activity;GO:1901363//heterocyclic compound binding;GO:0005488//binding;GO:0016887//ATPase activity;GO:0016817//hydrolase activity, acting on acid anhydrides;GO:0016818//hydrolase activity, a…	-
miR9566-y	Unigene0088698	-	347	4	2	0.002	2	2	PREDICTED: 54S ribosomal protein L37, mitochondrial [Sesamum indicum]	-	-	-
miR9566-y	Unigene0066864	KINESIN-13A	2068	4	2	0.002	4	4	PREDICTED: kinesin-like protein KIN-13A [Nelumbo nucifera]	GO:0043227//membrane-bounded organelle;GO:0044446//intracellular organelle part;GO:0043231//intracellular membrane-bounded organelle;GO:0005622//intracellular;GO:0044422//organelle part;GO:0005794//Golgi apparatus;GO:0043229//intracellular organelle;GO:0015630//microtubule cytoskeleton;GO:0005737//cytoplasm;GO:0044464//cell part;GO:0012505//endomembrane system;GO:0043226//organelle;GO:0043232//in…	GO:0032550//purine ribonucleoside binding;GO:0005488//binding;GO:0001882//nucleoside binding;GO:0005515//protein binding;GO:0016787//hydrolase activity;GO:0016818//hydrolase activity, acting on acid anhydrides, in phosphorus-containing anhydrides;GO:0015631//tubulin binding;GO:0016817//hydrolase activity, acting on acid anhydrides;GO:0008092//cytoskeletal protein binding;GO:0001883//purine nucleo…	GO:0044699//single-organism process;GO:0044767//single-organism developmental process;GO:0043933//macromolecular complex subunit organization;GO:0007010//cytoskeleton organization;GO:0000003//reproduction;GO:0009888//tissue development;GO:0045229//external encapsulating structure organization;GO:0071822//protein complex subunit organization;GO:0044237//cellular metabolic process;GO:0007275//multi…
miR9566-y	Unigene0058402	dyrk2	1536	3.5	2	0.002	2	2	Kinase domain-containing protein isoform 1 [Theobroma cacao]	-	GO:0003824//catalytic activity;GO:0016772//transferase activity, transferring phosphorus-containing groups;GO:0016301//kinase activity;GO:0016740//transferase activity	GO:0006796//phosphate-containing compound metabolic process;GO:0008152//metabolic process;GO:0006793//phosphorus metabolic process;GO:0044237//cellular metabolic process;GO:0009987//cellular process
miR9566-y	Unigene0082348	-	719	3.5	2	0.002	2	2	E3 ubiquitin-protein ligase UPL6 [Morus notabilis]	-	-	-
miR9566-y	Unigene0058265	Os02g0611500	2057	4.5	2	0.002	2	2	PREDICTED: eukaryotic translation initiation factor [Vitis vinifera]	-	-	-
miR9566-y	Unigene0056566	-	390	4.5	0	0.006	29	29	PREDICTED: uncharacterized protein LOC104600482 isoform X1 [Nelumbo nucifera]	-	-	-
miR9566-y	Unigene0053514	GK-2	1999	4	2	0.002	3	1.5	PREDICTED: guanylate kinase 2-like [Nelumbo nucifera]	-	GO:0016740//transferase activity;GO:0003824//catalytic activity;GO:0016772//transferase activity, transferring phosphorus-containing groups	GO:0008152//metabolic process;GO:0006796//phosphate-containing compound metabolic process;GO:0019637//organophosphate metabolic process;GO:0006793//phosphorus metabolic process;GO:0044699//single-organism process;GO:0044710//single-organism metabolic process;GO:0009117//nucleotide metabolic process;GO:0006725//cellular aromatic compound metabolic process;GO:0006807//nitrogen compound metabolic pr…
miR9566-y	Unigene0053256	DOT2	2140	4.5	2	0.002	5	5	PREDICTED: SART-1 family protein DOT2 [Vitis vinifera]	-	-	-
novel-m0010-5p,novel-m0011-5p	Unigene0049507	SPL15	2195	3	2	0.014	2	2	PREDICTED: squamosa promoter-binding-like protein 14 [Nelumbo nucifera]	-	-	-
novel-m0010-5p,novel-m0011-5p	Unigene0037582	-	694	4.5	2	0.014	7	7	PREDICTED: neurofilament light polypeptide-like [Gossypium hirsutum]	-	-	-
novel-m0010-5p,novel-m0011-5p	Unigene0113229	-	378	4	2	0.014	5	5	hypothetical protein MANES_08G106000 [Manihot esculenta]	-	-	-
novel-m0010-5p,novel-m0011-5p	Unigene0054450	Os05g0200100	553	4.5	2	0.014	2	2	PREDICTED: thioredoxin-like 2, chloroplastic [Malus domestica]	-	-	GO:0044699//single-organism process
novel-m0010-5p,novel-m0011-5p	Unigene0086076	TOC75-3	492	3	2	0.014	14	14	PREDICTED: protein TOC75-3, chloroplastic-like [Phoenix dactylifera]	GO:0009527//plastid outer membrane;GO:0009526//plastid envelope;GO:0031090//organelle membrane;GO:0044446//intracellular organelle part;GO:0098588//bounding membrane of organelle;GO:0009536//plastid;GO:0044464//cell part;GO:0019867//outer membrane;GO:0031301//integral component of organelle membrane;GO:0031967//organelle envelope;GO:0031355//integral component of plastid outer membrane;GO:0016020…	GO:0022857//transmembrane transporter activity;GO:0005215//transporter activity;GO:0022884//macromolecule transmembrane transporter activity;GO:0022892//substrate-specific transporter activity;GO:0008320//protein transmembrane transporter activity;GO:0008565//protein transporter activity;GO:0022891//substrate-specific transmembrane transporter activity	GO:0006996//organelle organization;GO:0009987//cellular process;GO:0032502//developmental process;GO:0044763//single-organism cellular process;GO:1902578//single-organism localization;GO:0033036//macromolecule localization;GO:0008104//protein localization;GO:0070727//cellular macromolecule localization;GO:0045184//establishment of protein localization;GO:0051641//cellular localization;GO:0006810/…
novel-m0010-5p,novel-m0011-5p	Unigene0026840	KRI1	643	4.5	2	0.014	2	2	PREDICTED: protein KRI1 homolog [Nelumbo nucifera]	-	-	-
novel-m0010-5p,novel-m0011-5p	Unigene0054907	-	504	3	2	0.014	2	2	PREDICTED: protein ANTI-SILENCING 1-like [Nelumbo nucifera]	-	-	-
novel-m0010-5p,novel-m0011-5p	Unigene0029967	LEA14-A	1101	4	2	0.014	8	2.66667	late embryogenesis abundant protein [Tamarix hispida]	GO:0043231//intracellular membrane-bounded organelle;GO:0044444//cytoplasmic part;GO:0005623//cell;GO:0005622//intracellular;GO:0030054//cell junction;GO:0043226//organelle;GO:0005911//cell-cell junction;GO:0005737//cytoplasm;GO:0016020//membrane;GO:0044424//intracellular part;GO:0043227//membrane-bounded organelle;GO:0043229//intracellular organelle;GO:0044464//cell part	-	GO:0051234//establishment of localization;GO:1901576//organic substance biosynthetic process;GO:0006807//nitrogen compound metabolic process;GO:0001101//response to acid chemical;GO:0005975//carbohydrate metabolic process;GO:0006810//transport;GO:0019752//carboxylic acid metabolic process;GO:0006970//response to osmotic stress;GO:0009058//biosynthetic process;GO:0044237//cellular metabolic proces…
novel-m0010-5p,novel-m0011-5p	Unigene0113950	YLS9	589	4	2	0.014	3	3	PREDICTED: protein YLS9-like [Nelumbo nucifera]	-	-	-
novel-m0010-5p,novel-m0011-5p	Unigene0045504	SCC3	655	4.5	2	0.014	9	9	PREDICTED: sister-chromatid cohesion protein 3 [Elaeis guineensis]	-	-	-
novel-m0010-5p,novel-m0011-5p	Unigene0056864	PRP19	32	3	2	0.014	2	2	PREDICTED: pre-mRNA-processing factor 19 [Elaeis guineensis]	-	-	-
novel-m0010-5p,novel-m0011-5p	Unigene0023115	-	385	2.5	2	0.014	2	2	--	-	-	-
novel-m0010-5p,novel-m0011-5p	Unigene0029966	LEA14-A	1101	4	2	0.014	8	2.66667	late embryogenesis abundant protein [Tamarix hispida]	GO:0030054//cell junction;GO:0005622//intracellular;GO:0016020//membrane;GO:0005911//cell-cell junction;GO:0005623//cell;GO:0043226//organelle;GO:0044444//cytoplasmic part;GO:0043227//membrane-bounded organelle;GO:0044424//intracellular part;GO:0043229//intracellular organelle;GO:0044464//cell part;GO:0005737//cytoplasm;GO:0043231//intracellular membrane-bounded organelle	-	GO:0006807//nitrogen compound metabolic process;GO:0050896//response to stimulus;GO:0044249//cellular biosynthetic process;GO:0044283//small molecule biosynthetic process;GO:0044763//single-organism cellular process;GO:0044710//single-organism metabolic process;GO:0000097//sulfur amino acid biosynthetic process;GO:0044711//single-organism biosynthetic process;GO:0071704//organic substance metabol…
novel-m0010-5p,novel-m0011-5p	Unigene0049954	At3g62120	1737	3.5	2	0.014	5	5	PREDICTED: proline--tRNA ligase, cytoplasmic-like [Capsicum annuum]	-	-	-
novel-m0010-5p,novel-m0011-5p	Unigene0084401	-	112	4.5	2	0.014	13	6.5	--	-	-	-
novel-m0010-5p,novel-m0011-5p	Unigene0053382	At4g18375	70	4.5	2	0.014	8	8	PREDICTED: KH domain-containing protein At4g18375 [Elaeis guineensis]	-	GO:0003676//nucleic acid binding;GO:1901363//heterocyclic compound binding;GO:0005488//binding;GO:0097159//organic cyclic compound binding	-
novel-m0010-5p,novel-m0011-5p	Unigene0024390	-	417	3.5	1	0.012	3	3	--	-	-	-
novel-m0010-5p,novel-m0011-5p	Unigene0084458	GDH2	592	4.5	2	0.014	4	2	Glutamate dehydrogenase 2 [Theobroma cacao]	GO:0016020//membrane;GO:0044422//organelle part;GO:0005623//cell;GO:0043226//organelle;GO:0043231//intracellular membrane-bounded organelle;GO:0005622//intracellular;GO:0044464//cell part;GO:0043227//membrane-bounded organelle;GO:0044424//intracellular part;GO:0043229//intracellular organelle;GO:0031090//organelle membrane	GO:0046914//transition metal ion binding;GO:0003824//catalytic activity;GO:0097367//carbohydrate derivative binding;GO:0046872//metal ion binding;GO:0001882//nucleoside binding;GO:0043167//ion binding;GO:0036094//small molecule binding;GO:0005488//binding;GO:0032550//purine ribonucleoside binding;GO:0016638//oxidoreductase activity, acting on the CH-NH2 group of donors;GO:0043169//cation binding;…	GO:0009987//cellular process;GO:0043436//oxoacid metabolic process;GO:0044106//cellular amine metabolic process;GO:0034641//cellular nitrogen compound metabolic process;GO:0051234//establishment of localization;GO:0009072//aromatic amino acid family metabolic process;GO:0019752//carboxylic acid metabolic process;GO:0009308//amine metabolic process;GO:0044238//primary metabolic process;GO:0006725/…
novel-m0010-5p,novel-m0011-5p	Unigene0025247	RH56	1558	4.5	2	0.014	4	4	PREDICTED: DEAD-box ATP-dependent RNA helicase 56 [Nelumbo nucifera]	-	-	-
novel-m0010-5p,novel-m0011-5p	Unigene0029968	LEA14-A	1101	4	2	0.014	8	2.66667	late embryogenesis abundant protein [Tamarix hispida]	GO:0044444//cytoplasmic part;GO:0030054//cell junction;GO:0043229//intracellular organelle;GO:0043226//organelle;GO:0005622//intracellular;GO:0044464//cell part;GO:0005737//cytoplasm;GO:0016020//membrane;GO:0044424//intracellular part;GO:0005911//cell-cell junction;GO:0043227//membrane-bounded organelle;GO:0005623//cell;GO:0043231//intracellular membrane-bounded organelle	-	GO:0010035//response to inorganic substance;GO:0043436//oxoacid metabolic process;GO:1901576//organic substance biosynthetic process;GO:0019318//hexose metabolic process;GO:0044272//sulfur compound biosynthetic process;GO:1901566//organonitrogen compound biosynthetic process;GO:0006520//cellular amino acid metabolic process;GO:0005996//monosaccharide metabolic process;GO:0009058//biosynthetic pro…
novel-m0010-5p,novel-m0011-5p	Unigene0008504	-	445	4.5	2	0.014	2	2	Phosphoribosylformylglycinamidine synthase 2 [Anthurium amnicola]	-	-	-
novel-m0010-5p,novel-m0011-5p	Unigene0076014	-	84	4	2	0.014	9	9	Retrovirus-related Pol polyprotein from transposon 17.6 [Cajanus cajan]	-	-	-
novel-m0010-5p,novel-m0011-5p	Unigene0076986	ABCF4	334	3.5	2	0.014	2	2	PREDICTED: ABC transporter F family member 4 [Ipomoea nil]	-	-	-
novel-m0010-5p,novel-m0011-5p	Unigene0080572	-	1066	4.5	2	0.014	2	2	--	-	-	-
novel-m0010-5p,novel-m0011-5p	Unigene0030373	-	2417	4	2	0.014	2	1	PREDICTED: histone H3.v1-like isoform X2 [Nelumbo nucifera]	-	-	-
novel-m0010-5p,novel-m0011-5p	Unigene0088290	ASIL2	242	4	2	0.014	3	3	PREDICTED: trihelix transcription factor ASIL1 [Amborella trichopoda]	-	-	-
novel-m0010-5p,novel-m0011-5p	Unigene0089228	RPL22B	295	4.5	2	0.014	2	2	PREDICTED: 60S ribosomal protein L22-2 [Nelumbo nucifera]	GO:0044464//cell part;GO:0005623//cell;GO:0030529//intracellular ribonucleoprotein complex;GO:1990904//ribonucleoprotein complex;GO:0032991//macromolecular complex;GO:0044424//intracellular part;GO:0005622//intracellular	-	GO:0071704//organic substance metabolic process;GO:0008152//metabolic process;GO:0010467//gene expression;GO:0043170//macromolecule metabolic process
novel-m0010-5p,novel-m0011-5p	Unigene0030372	-	2520	4	2	0.014	2	1	PREDICTED: histone H3.v1-like isoform X2 [Nelumbo nucifera]	-	-	-
novel-m0010-5p,novel-m0011-5p	Unigene0024578	-	37	4.5	2	0.014	4	4	PREDICTED: uncharacterized protein LOC104610075 isoform X2 [Nelumbo nucifera]	-	-	-
novel-m0010-5p,novel-m0011-5p	Unigene0065363	-	183	4	2	0.014	3	1.5	--	-	-	-
novel-m0010-5p,novel-m0011-5p	Unigene0099957	-	330	4.5	2	0.014	2	2	Lysine--tRNA ligase [Anthurium amnicola]	-	-	-
novel-m0010-5p,novel-m0011-5p	Unigene0076030	-	175	4.5	2	0.014	15	15	--	-	-	-
novel-m0010-5p,novel-m0011-5p	Unigene0006809	UTP14	1035	4	2	0.014	8	8	PREDICTED: U3 small nucleolar RNA-associated protein 14 homolog A [Vitis vinifera]	-	-	-
novel-m0010-5p,novel-m0011-5p	Unigene0023258	IP5P8	778	4.5	2	0.014	2	2	PREDICTED: type I inositol 1,4,5-trisphosphate 5-phosphatase CVP2 [Cicer arietinum]	-	-	-
novel-m0010-5p,novel-m0011-5p	Unigene0070282	Gigyf2	5272	4	2	0.014	5	5	PREDICTED: uncharacterized protein LOC104588158 isoform X2 [Nelumbo nucifera]	-	-	-
novel-m0010-5p,novel-m0011-5p	Unigene0084400	-	119	4.5	2	0.014	13	6.5	--	-	-	-
novel-m0010-5p,novel-m0011-5p	Unigene0002842	GDH	592	4.5	2	0.014	4	2	Glutamate dehydrogenase 2, partial [Anthurium amnicola]	GO:0016020//membrane;GO:0043231//intracellular membrane-bounded organelle;GO:0031090//organelle membrane;GO:0043227//membrane-bounded organelle;GO:0005622//intracellular;GO:0005623//cell;GO:0044424//intracellular part;GO:0044464//cell part;GO:0044422//organelle part;GO:0043226//organelle;GO:0043229//intracellular organelle	GO:0043169//cation binding;GO:0043167//ion binding;GO:1901363//heterocyclic compound binding;GO:0016646//oxidoreductase activity, acting on the CH-NH group of donors, NAD or NADP as acceptor;GO:0001882//nucleoside binding;GO:0097367//carbohydrate derivative binding;GO:0032550//purine ribonucleoside binding;GO:0036094//small molecule binding;GO:0032549//ribonucleoside binding;GO:0016639//oxidoredu…	GO:0051179//localization;GO:0006520//cellular amino acid metabolic process;GO:0006575//cellular modified amino acid metabolic process;GO:0051234//establishment of localization;GO:0044710//single-organism metabolic process;GO:0005996//monosaccharide metabolic process;GO:0044699//single-organism process;GO:0005975//carbohydrate metabolic process;GO:0071840//cellular component organization or biogen…
novel-m0010-5p,novel-m0011-5p	Unigene0083193	At5g26707	1262	4.5	2	0.014	3	3	PREDICTED: glutamate--tRNA ligase, cytoplasmic [Nelumbo nucifera]	GO:0044424//intracellular part;GO:0005623//cell;GO:0044464//cell part;GO:0005737//cytoplasm;GO:0005622//intracellular;GO:0044444//cytoplasmic part	GO:0097159//organic cyclic compound binding;GO:0036094//small molecule binding;GO:0016874//ligase activity;GO:0001882//nucleoside binding;GO:0032549//ribonucleoside binding;GO:0032550//purine ribonucleoside binding;GO:0016876//ligase activity, forming aminoacyl-tRNA and related compounds;GO:0005488//binding;GO:0003824//catalytic activity;GO:1901363//heterocyclic compound binding;GO:0001883//purin…	GO:0009059//macromolecule biosynthetic process;GO:0006996//organelle organization;GO:0043038//amino acid activation;GO:0043436//oxoacid metabolic process;GO:1901564//organonitrogen compound metabolic process;GO:1901576//organic substance biosynthetic process;GO:0006006//glucose metabolic process;GO:0006725//cellular aromatic compound metabolic process;GO:0030163//protein catabolic process;GO:0044…
novel-m0010-5p,novel-m0011-5p	Unigene0075226	ccdc94	733	3	2	0.014	10	10	PREDICTED: coiled-coil domain-containing protein 94 homolog [Glycine max]	-	-	-
novel-m0010-5p,novel-m0011-5p	Unigene0064419	RPS24B	386	4.5	2	0.014	15	15	PREDICTED: 40S ribosomal protein S24-1 [Ipomoea nil]	GO:0005623//cell;GO:0044424//intracellular part;GO:1990904//ribonucleoprotein complex;GO:0030529//intracellular ribonucleoprotein complex;GO:0005622//intracellular;GO:0044464//cell part;GO:0032991//macromolecular complex	GO:0005198//structural molecule activity	GO:0008152//metabolic process;GO:0043170//macromolecule metabolic process;GO:0010467//gene expression;GO:0071704//organic substance metabolic process
novel-m0010-5p,novel-m0011-5p	Unigene0082170	SPBP8B7.15c	1649	4.5	2	0.014	5	5	PREDICTED: protein MPE1-like isoform X4 [Nelumbo nucifera]	-	-	-
novel-m0010-5p,novel-m0011-5p	Unigene0073266	CYP97A3	1171	4.5	2	0.014	7	7	PREDICTED: protein LUTEIN DEFICIENT 5, chloroplastic-like isoform X1 [Nelumbo nucifera]	GO:0043226//organelle;GO:0044464//cell part;GO:0044446//intracellular organelle part;GO:0009536//plastid;GO:0043229//intracellular organelle;GO:0031967//organelle envelope;GO:0031090//organelle membrane;GO:0005737//cytoplasm;GO:0044424//intracellular part;GO:0044422//organelle part;GO:0031975//envelope;GO:0005623//cell;GO:0044435//plastid part;GO:0043231//intracellular membrane-bounded organelle;…	GO:0016712//oxidoreductase activity, acting on paired donors, with incorporation or reduction of molecular oxygen, reduced flavin or flavoprotein as one donor, and incorporation of one atom of oxygen;GO:0097159//organic cyclic compound binding;GO:0046914//transition metal ion binding;GO:0004497//monooxygenase activity;GO:0016705//oxidoreductase activity, acting on paired donors, with incorporatio…	GO:0018130//heterocycle biosynthetic process;GO:0043170//macromolecule metabolic process;GO:0016114//terpenoid biosynthetic process;GO:0009893//positive regulation of metabolic process;GO:0006779//porphyrin-containing compound biosynthetic process;GO:0050789//regulation of biological process;GO:0044710//single-organism metabolic process;GO:0046148//pigment biosynthetic process;GO:0008299//isopren…
novel-m0010-5p,novel-m0011-5p	Unigene0026292	-	102	3.5	2	0.014	2	2	PREDICTED: glucosidase 2 subunit beta [Phoenix dactylifera]	-	-	-
novel-m0010-5p,novel-m0011-5p	Unigene0033109	PPA4	341	3.5	2	0.014	3	3	PREDICTED: soluble inorganic pyrophosphatase 4-like [Phoenix dactylifera]	-	-	-
novel-m0010-5p,novel-m0011-5p	Unigene0010855	APUM3	433	3.5	2	0.014	4	4	PREDICTED: pumilio homolog 2-like [Nelumbo nucifera]	-	-	-
novel-m0010-5p,novel-m0011-5p	Unigene0101320	yuiD	31	3.5	2	0.014	2	2	Acid phosphatase/vanadium-dependent haloperoxidase-related protein [Theobroma cacao]	-	-	GO:0008152//metabolic process;GO:0044699//single-organism process;GO:0044710//single-organism metabolic process
novel-m0010-5p,novel-m0011-5p	Unigene0011482	ELC	781	4	2	0.014	5	5	PREDICTED: protein ELC-like [Nelumbo nucifera]	-	-	GO:0033036//macromolecule localization;GO:0051179//localization;GO:0008104//protein localization
novel-m0010-5p,novel-m0011-5p	Unigene0063579	-	2254	4	2	0.014	2	2	hypothetical protein CISIN_1g0136582mg, partial [Citrus sinensis]	-	-	-
novel-m0010-5p,novel-m0011-5p	Unigene0070852	Os07g0682400	765	4.5	2	0.014	3	3	PREDICTED: zinc finger CCCH domain-containing protein 53 isoform X1 [Vitis vinifera]	-	-	-
novel-m0010-5p,novel-m0011-5p	Unigene0082031	-	70	4.5	2	0.014	2	2	Transmembrane protein DDB_G0273707/DDB_G0273361 [Anthurium amnicola]	-	-	-
novel-m0010-5p,novel-m0011-5p	Unigene0059281	B3GALT19	2478	4	2	0.014	2	2	PREDICTED: hydroxyproline O-galactosyltransferase GALT6-like [Nelumbo nucifera]	GO:0016020//membrane;GO:0044425//membrane part;GO:0031224//intrinsic component of membrane	GO:0016757//transferase activity, transferring glycosyl groups;GO:0035250//UDP-galactosyltransferase activity;GO:0005488//binding;GO:0008194//UDP-glycosyltransferase activity;GO:0016758//transferase activity, transferring hexosyl groups;GO:0016740//transferase activity;GO:0008378//galactosyltransferase activity;GO:0003824//catalytic activity	GO:0044267//cellular protein metabolic process;GO:0008152//metabolic process;GO:0043170//macromolecule metabolic process;GO:0044237//cellular metabolic process;GO:0009987//cellular process;GO:0006464//cellular protein modification process;GO:0044260//cellular macromolecule metabolic process;GO:0044238//primary metabolic process;GO:0036211//protein modification process;GO:0019538//protein metaboli…
novel-m0010-5p,novel-m0011-5p	Unigene0054395	-	189	4.5	2	0.014	69	69	PLATZ transcription factor family protein [Medicago truncatula]	-	-	-
novel-m0010-5p,novel-m0011-5p	Unigene0026998	HIPP26	1196	4	2	0.014	59	59	PREDICTED: heavy metal-associated isoprenylated plant protein 3-like [Nelumbo nucifera]	-	-	-
novel-m0010-5p,novel-m0011-5p	Unigene0038713	At5g01610	875	4.5	2	0.014	3	3	DUF538 domain-containing protein [Cephalotus follicularis]	-	-	-
novel-m0010-5p,novel-m0011-5p	Unigene0047189	UGT82A1	255	3.5	2	0.014	2	2	PREDICTED: UDP-glycosyltransferase 82A1 [Prunus mume]	-	GO:0016740//transferase activity;GO:0003824//catalytic activity	-
novel-m0010-5p,novel-m0011-5p	Unigene0015547	nfrkb	3045	4.5	2	0.014	4	4	PREDICTED: uncharacterized protein LOC104599217 [Nelumbo nucifera]	-	-	GO:0071840//cellular component organization or biogenesis;GO:0034641//cellular nitrogen compound metabolic process;GO:0051321//meiotic cell cycle;GO:0043170//macromolecule metabolic process;GO:0048285//organelle fission;GO:0044699//single-organism process;GO:0044702//single organism reproductive process;GO:0006996//organelle organization;GO:0090304//nucleic acid metabolic process;GO:0044260//cell…
novel-m0010-5p,novel-m0011-5p	Unigene0009052	NUB1	804	4.5	2	0.014	2	2	PREDICTED: NEDD8 ultimate buster 1 [Nelumbo nucifera]	-	-	-
novel-m0010-5p,novel-m0011-5p	Unigene0079468	CYP93A1	915	4	2	0.014	17	17	PREDICTED: cytochrome P450 93A3-like [Ziziphus jujuba]	-	GO:0005488//binding	-
novel-m0010-5p,novel-m0011-5p	Unigene0054554	pof4	936	4.5	2	0.014	2	2	PREDICTED: transcription elongation factor B polypeptide 3 [Musa acuminata subsp. malaccensis] [Musa acuminata]	-	-	-
novel-m0010-5p,novel-m0011-5p	Unigene0105260	IKU1	536	4	2	0.014	2	2	PREDICTED: protein HAIKU1-like [Juglans regia]	-	-	-
novel-m0010-5p,novel-m0011-5p	Unigene0082178	-	834	3.5	2	0.014	2	2	--	-	-	-
novel-m0010-5p,novel-m0011-5p	Unigene0065363	-	75	4	2	0.014	3	1.5	--	-	-	-
novel-m0010-5p,novel-m0011-5p	Unigene0081133	FH6	110	4	2	0.014	2	2	PREDICTED: formin-like protein 17 [Phoenix dactylifera]	-	-	-
novel-m0010-5p,novel-m0011-5p	Unigene0106264	rplT	619	4	2	0.014	2	2	PREDICTED: 50S ribosomal protein L20-like [Phoenix dactylifera]	-	-	-
novel-m0010-5p,novel-m0011-5p	Unigene0061001	TULP5	1516	4	2	0.014	2	2	PREDICTED: tubby-like F-box protein 5 [Ziziphus jujuba]	GO:0044464//cell part;GO:0043231//intracellular membrane-bounded organelle;GO:0016020//membrane;GO:0043227//membrane-bounded organelle;GO:0044444//cytoplasmic part;GO:0044424//intracellular part;GO:0005737//cytoplasm;GO:0043226//organelle;GO:0005623//cell;GO:0005622//intracellular;GO:0043229//intracellular organelle	-	GO:0065007//biological regulation;GO:0010468//regulation of gene expression;GO:0051707//response to other organism;GO:0050789//regulation of biological process;GO:0009605//response to external stimulus;GO:0019222//regulation of metabolic process;GO:0009607//response to biotic stimulus;GO:0051704//multi-organism process;GO:0043207//response to external biotic stimulus;GO:0050896//response to stimu…
novel-m0010-5p,novel-m0011-5p	Unigene0071211	NPF8.3	1331	3.5	2	0.014	2	2	PREDICTED: protein NRT1/ PTR FAMILY 8.3-like [Phoenix dactylifera]	GO:0016020//membrane;GO:0044425//membrane part;GO:0031224//intrinsic component of membrane	-	GO:0071705//nitrogen compound transport;GO:0042886//amide transport;GO:0071702//organic substance transport;GO:1902578//single-organism localization;GO:0044765//single-organism transport;GO:0051179//localization;GO:0015833//peptide transport;GO:0006810//transport;GO:0051234//establishment of localization;GO:0044699//single-organism process
novel-m0010-5p,novel-m0011-5p	Unigene0058516	HSP81-1	49	4.5	2	0.014	7	7	PREDICTED: heat shock cognate protein 80 [Nelumbo nucifera]	-	-	-
novel-m0010-5p,novel-m0011-5p	Unigene0088065	Ttc1	207	3.5	2	0.014	34	34	hypothetical protein PRUPE_6G184800 [Prunus persica]	-	-	-
novel-m0010-5p,novel-m0011-5p	Unigene0015242	-	505	4.5	2	0.014	6	6	PREDICTED: uncharacterized protein LOC104606490 [Nelumbo nucifera]	-	-	-
novel-m0010-5p,novel-m0011-5p	Unigene0011064	spast	81	3	2	0.014	2	1	PREDICTED: spastin isoform X1 [Citrus sinensis]	GO:0044464//cell part;GO:0005623//cell	GO:0036094//small molecule binding;GO:0001883//purine nucleoside binding;GO:0005488//binding;GO:0016462//pyrophosphatase activity;GO:0097159//organic cyclic compound binding;GO:0016818//hydrolase activity, acting on acid anhydrides, in phosphorus-containing anhydrides;GO:0001882//nucleoside binding;GO:1901363//heterocyclic compound binding;GO:0032549//ribonucleoside binding;GO:0097367//carbohydra…	GO:0034613//cellular protein localization;GO:0008104//protein localization;GO:0006886//intracellular protein transport;GO:0072662//protein localization to peroxisome;GO:0051179//localization;GO:0070727//cellular macromolecule localization;GO:0044710//single-organism metabolic process;GO:0032787//monocarboxylic acid metabolic process;GO:0006631//fatty acid metabolic process;GO:0015031//protein tra…
novel-m0010-5p,novel-m0011-5p	Unigene0005034	rhp16	3051	4.5	2	0.014	2	2	PREDICTED: DNA repair protein RAD16 [Vitis vinifera]	-	GO:0001882//nucleoside binding;GO:0016818//hydrolase activity, acting on acid anhydrides, in phosphorus-containing anhydrides;GO:0043167//ion binding;GO:0001883//purine nucleoside binding;GO:0097159//organic cyclic compound binding;GO:0032550//purine ribonucleoside binding;GO:0043169//cation binding;GO:0097367//carbohydrate derivative binding;GO:0005488//binding;GO:0016462//pyrophosphatase activi…	-
novel-m0010-5p,novel-m0011-5p	Unigene0073043	CBSPPR1	1385	4	2	0.014	2	2	PREDICTED: pentatricopeptide repeat-containing protein At5g10690 isoform X1 [Phoenix dactylifera]	-	-	-
novel-m0010-5p,novel-m0011-5p	Unigene0055196	At3g01520	629	4	2	0.014	2	2	PREDICTED: universal stress protein PHOS32 [Phoenix dactylifera]	-	-	-
novel-m0010-5p,novel-m0011-5p	Unigene0066442	RFS	229	4.5	2	0.014	2	2	PREDICTED: galactinol--sucrose galactosyltransferase [Vitis vinifera]	-	GO:0008378//galactosyltransferase activity;GO:0003824//catalytic activity;GO:0016758//transferase activity, transferring hexosyl groups;GO:0016740//transferase activity;GO:0016757//transferase activity, transferring glycosyl groups	-
novel-m0010-5p,novel-m0011-5p	Unigene0089295	-	243	4.5	2	0.014	12	12	--	-	-	-
novel-m0010-5p,novel-m0011-5p	Unigene0083193	At5g26707	1343	4.5	2	0.014	4	4	PREDICTED: glutamate--tRNA ligase, cytoplasmic [Nelumbo nucifera]	GO:0044424//intracellular part;GO:0005623//cell;GO:0044464//cell part;GO:0005737//cytoplasm;GO:0005622//intracellular;GO:0044444//cytoplasmic part	GO:0097159//organic cyclic compound binding;GO:0036094//small molecule binding;GO:0016874//ligase activity;GO:0001882//nucleoside binding;GO:0032549//ribonucleoside binding;GO:0032550//purine ribonucleoside binding;GO:0016876//ligase activity, forming aminoacyl-tRNA and related compounds;GO:0005488//binding;GO:0003824//catalytic activity;GO:1901363//heterocyclic compound binding;GO:0001883//purin…	GO:0009059//macromolecule biosynthetic process;GO:0006996//organelle organization;GO:0043038//amino acid activation;GO:0043436//oxoacid metabolic process;GO:1901564//organonitrogen compound metabolic process;GO:1901576//organic substance biosynthetic process;GO:0006006//glucose metabolic process;GO:0006725//cellular aromatic compound metabolic process;GO:0030163//protein catabolic process;GO:0044…
novel-m0010-5p,novel-m0011-5p	Unigene0094501	SKIP24	566	4	2	0.014	2	2	PREDICTED: F-box protein SKIP24 isoform X2 [Phoenix dactylifera]	-	-	-
novel-m0010-5p,novel-m0011-5p	Unigene0034812	NHX3	718	4	2	0.014	2	2	PREDICTED: sodium/hydrogen exchanger 2-like [Phoenix dactylifera]	-	-	-
novel-m0010-5p,novel-m0011-5p	Unigene0043950	spast	81	3	2	0.014	2	1	PREDICTED: spastin isoform X1 [Theobroma cacao]	GO:0044464//cell part;GO:0005623//cell	GO:0097367//carbohydrate derivative binding;GO:0016462//pyrophosphatase activity;GO:0001883//purine nucleoside binding;GO:0032549//ribonucleoside binding;GO:0036094//small molecule binding;GO:0001882//nucleoside binding;GO:0016818//hydrolase activity, acting on acid anhydrides, in phosphorus-containing anhydrides;GO:0016817//hydrolase activity, acting on acid anhydrides;GO:0032550//purine ribonuc…	GO:0071704//organic substance metabolic process;GO:0044281//small molecule metabolic process;GO:0072594//establishment of protein localization to organelle;GO:0043574//peroxisomal transport;GO:0046907//intracellular transport;GO:1902578//single-organism localization;GO:0008152//metabolic process;GO:0072663//establishment of protein localization to peroxisome;GO:0016054//organic acid catabolic pro…
novel-m0059-3p	Unigene0096280	-	315	4	2	0.018	4	4	Golgin subfamily A member 4 [Theobroma cacao]	-	-	GO:0009987//cellular process;GO:0043170//macromolecule metabolic process;GO:0044260//cellular macromolecule metabolic process;GO:0006325//chromatin organization;GO:0044238//primary metabolic process;GO:0071704//organic substance metabolic process;GO:0010468//regulation of gene expression;GO:0060255//regulation of macromolecule metabolic process;GO:0016568//chromatin modification;GO:0010629//negat…
novel-m0059-3p	Unigene0077218	CWC25	798	4	2	0.018	6	6	PREDICTED: pre-mRNA-splicing factor CWC25 homolog [Nelumbo nucifera]	-	-	-
novel-m0059-3p	Unigene0042207	SDH	1271	4	2	0.018	3	3	ADH_zinc_N domain-containing protein/ADH_N domain-containing protein [Cephalotus follicularis]	-	GO:0043169//cation binding;GO:0003824//catalytic activity;GO:0005488//binding;GO:0043167//ion binding	GO:0044699//single-organism process;GO:0044710//single-organism metabolic process;GO:0008152//metabolic process
novel-m0059-3p	Unigene0047189	UGT82A1	255	4.5	2	0.018	2	2	PREDICTED: UDP-glycosyltransferase 82A1 [Prunus mume]	-	GO:0016740//transferase activity;GO:0003824//catalytic activity	-
novel-m0059-3p	Unigene0069729	-	134	4.5	2	0.018	2	2	orf107b gene product (mitochondrion) [Beta vulgaris subsp. vulgaris] [Beta vulgaris]	-	-	-
novel-m0059-3p	Unigene0066461	ORP1C	30	4	2	0.018	3	3	PREDICTED: oxysterol-binding protein-related protein 1C [Amborella trichopoda]	-	-	-
novel-m0059-3p	Unigene0049389	RS40	972	4.5	2	0.018	4	4	PREDICTED: serine/arginine-rich splicing factor RS41 isoform X1 [Nelumbo nucifera]	-	-	-
novel-m0059-3p	Unigene0067373	B3GALT7	11	4.5	2	0.018	4	1.33333	PREDICTED: beta-1,3-galactosyltransferase 7 [Nelumbo nucifera]	GO:0031224//intrinsic component of membrane;GO:0016020//membrane;GO:0044425//membrane part	GO:0016758//transferase activity, transferring hexosyl groups;GO:0016740//transferase activity;GO:0003824//catalytic activity;GO:0016757//transferase activity, transferring glycosyl groups	GO:0006464//cellular protein modification process;GO:0009987//cellular process;GO:0008152//metabolic process;GO:0019538//protein metabolic process;GO:0044238//primary metabolic process;GO:0044237//cellular metabolic process;GO:0043412//macromolecule modification;GO:0044260//cellular macromolecule metabolic process;GO:0036211//protein modification process;GO:0044267//cellular protein metabolic pro…
novel-m0059-3p	Unigene0030373	-	2264	4	2	0.018	3	1.5	PREDICTED: histone H3.v1-like isoform X2 [Nelumbo nucifera]	-	-	-
novel-m0059-3p	Unigene0080405	OASB	115	4	2	0.018	14	14	PREDICTED: cysteine synthase-like [Nelumbo nucifera]	-	GO:0003824//catalytic activity	GO:0044249//cellular biosynthetic process;GO:0044699//single-organism process;GO:0016053//organic acid biosynthetic process;GO:0044272//sulfur compound biosynthetic process;GO:0006563//L-serine metabolic process;GO:0000096//sulfur amino acid metabolic process;GO:0006790//sulfur compound metabolic process;GO:0006520//cellular amino acid metabolic process;GO:0044763//single-organism cellular proces…
novel-m0059-3p	Unigene0075280	MBR1	484	4	2	0.018	2	1	PREDICTED: RING finger protein 165-like [Nelumbo nucifera]	-	-	-
novel-m0059-3p	Unigene0096116	CYP98A2	362	4.5	2	0.018	3	3	PREDICTED: cytochrome P450 98A2 [Populus euphratica]	-	GO:0046906//tetrapyrrole binding;GO:0043167//ion binding;GO:0003824//catalytic activity;GO:0046872//metal ion binding;GO:0016709//oxidoreductase activity, acting on paired donors, with incorporation or reduction of molecular oxygen, NAD(P)H as one donor, and incorporation of one atom of oxygen;GO:0004497//monooxygenase activity;GO:0005488//binding;GO:0016705//oxidoreductase activity, acting on pa…	GO:0008152//metabolic process;GO:0044710//single-organism metabolic process;GO:0044699//single-organism process
novel-m0059-3p	Unigene0026961	CDC73	33	4	2	0.018	2	2	PREDICTED: protein CDC73 homolog [Nelumbo nucifera]	-	-	GO:0044707//single-multicellular organism process;GO:0048856//anatomical structure development;GO:0032502//developmental process;GO:0048731//system development;GO:0007275//multicellular organism development;GO:0000003//reproduction;GO:0044699//single-organism process;GO:0044767//single-organism developmental process;GO:0061458//reproductive system development;GO:0048608//reproductive structure de…
novel-m0059-3p	Unigene0100292	BTF3	638	3.5	2	0.018	3	3	PREDICTED: nascent polypeptide-associated complex subunit beta-like isoform X2 [Nelumbo nucifera]	-	-	GO:0050789//regulation of biological process;GO:0010468//regulation of gene expression;GO:0060255//regulation of macromolecule metabolic process;GO:0019222//regulation of metabolic process;GO:0065007//biological regulation
novel-m0059-3p	Unigene0067732	CYCD1-1	822	4.5	2	0.018	3	3	PREDICTED: cyclin-D1-1 [Nelumbo nucifera]	-	-	-
novel-m0059-3p	Unigene0045874	-	592	2.5	2	0.018	2	1	PREDICTED: heavy metal-associated isoprenylated plant protein 3-like [Nelumbo nucifera]	-	-	-
novel-m0059-3p	Unigene0045819	-	1449	4	2	0.018	5	2.5	PREDICTED: midasin-like [Nelumbo nucifera]	-	-	-
novel-m0059-3p	Unigene0054907	-	504	4	2	0.018	2	2	PREDICTED: protein ANTI-SILENCING 1-like [Nelumbo nucifera]	-	-	-
novel-m0059-3p	Unigene0040422	GBF3	540	3	2	0.018	5	2.5	PREDICTED: common plant regulatory factor 1-like isoform X2 [Vigna radiata var. radiata] [Vigna radiata]	-	-	GO:0009059//macromolecule biosynthetic process;GO:0043170//macromolecule metabolic process;GO:0008152//metabolic process;GO:0009987//cellular process;GO:0009058//biosynthetic process;GO:0071704//organic substance metabolic process;GO:0034645//cellular macromolecule biosynthetic process;GO:0044260//cellular macromolecule metabolic process;GO:0044249//cellular biosynthetic process;GO:1901576//organ…
novel-m0059-3p	Unigene0057497	TUBB1	291	4	2	0.018	11	11	PREDICTED: tubulin beta-1 chain [Vitis vinifera]	GO:0015630//microtubule cytoskeleton;GO:0005623//cell;GO:0032991//macromolecular complex;GO:0044464//cell part;GO:0005622//intracellular;GO:0043229//intracellular organelle;GO:0005856//cytoskeleton;GO:0043232//intracellular non-membrane-bounded organelle;GO:0044424//intracellular part;GO:0043228//non-membrane-bounded organelle;GO:0043226//organelle	GO:0097367//carbohydrate derivative binding;GO:0036094//small molecule binding;GO:0016817//hydrolase activity, acting on acid anhydrides;GO:0005488//binding;GO:0001882//nucleoside binding;GO:0016787//hydrolase activity;GO:0097159//organic cyclic compound binding;GO:0016462//pyrophosphatase activity;GO:1901363//heterocyclic compound binding;GO:0005198//structural molecule activity;GO:0003824//cata…	GO:0034622//cellular macromolecular complex assembly;GO:0044763//single-organism cellular process;GO:0006461//protein complex assembly;GO:0071840//cellular component organization or biogenesis;GO:0070271//protein complex biogenesis;GO:0009987//cellular process;GO:0071822//protein complex subunit organization;GO:0022607//cellular component assembly;GO:0043933//macromolecular complex subunit organi…
novel-m0059-3p	Unigene0006950	-	195	4	2	0.018	2	2	LOW QUALITY PROTEIN: DUF4378 domain-containing protein, partial [Cephalotus follicularis]	-	-	-
novel-m0059-3p	Unigene0088290	ASIL2	242	3.5	2	0.018	3	3	PREDICTED: trihelix transcription factor ASIL1 [Amborella trichopoda]	-	-	-
novel-m0059-3p	Unigene0019566	RANGAP1	1770	4.5	2	0.018	3	1.5	RAN GTPase-activating protein 1 [Anthurium amnicola]	-	-	-
novel-m0059-3p	Unigene0012293	ssh4	1269	4.5	2	0.018	2	2	SPla/RYanodine receptor domain-containing protein [Theobroma cacao]	-	-	-
novel-m0059-3p	Unigene0065411	-	127	4.5	2	0.018	2	2	DNA-directed RNA polymerase subunit beta', partial [Anthurium amnicola]	-	-	-
novel-m0059-3p	Unigene0046361	-	595	4.5	2	0.018	23	23	hypothetical protein PRUPE_ppa013160mg [Prunus persica]	-	-	-
novel-m0059-3p	Unigene0052695	PQL3	3202	4	2	0.018	25	25	Histone H2A deubiquitinase MYSM1 [Anthurium amnicola]	-	-	-
novel-m0059-3p	Unigene0101339	-	53	3.5	2	0.018	2	2	--	-	-	-
novel-m0059-3p	Unigene0085380	IGHMBP2	2197	4.5	2	0.018	2	2	PREDICTED: uncharacterized ATP-dependent helicase C29A10.10c-like isoform X1 [Phoenix dactylifera]	-	-	-
novel-m0059-3p	Unigene0054515	TT12	1631	4	2	0.018	6	3	PREDICTED: protein DETOXIFICATION 20-like [Nelumbo nucifera]	GO:0031224//intrinsic component of membrane;GO:0044425//membrane part;GO:0016020//membrane	GO:0022857//transmembrane transporter activity;GO:0015291//secondary active transmembrane transporter activity;GO:0022804//active transmembrane transporter activity;GO:0005215//transporter activity	GO:0044699//single-organism process;GO:0044763//single-organism cellular process;GO:0009987//cellular process
novel-m0059-3p	Unigene0068799	Acin1	1244	4	2	0.018	3	3	PREDICTED: apoptotic chromatin condensation inducer in the nucleus [Jatropha curcas]	-	-	GO:0044699//single-organism process;GO:0016043//cellular component organization;GO:0090304//nucleic acid metabolic process;GO:0044763//single-organism cellular process;GO:0043170//macromolecule metabolic process;GO:0051128//regulation of cellular component organization;GO:0006139//nucleobase-containing compound metabolic process;GO:0034641//cellular nitrogen compound metabolic process;GO:0050794/…
novel-m0059-3p	Unigene0054119	YMR099C	448	3.5	2	0.018	2	2	Galactose mutarotase-like superfamily protein isoform 1 [Theobroma cacao]	-	GO:0005488//binding;GO:0003824//catalytic activity	GO:0044238//primary metabolic process;GO:0008152//metabolic process
novel-m0059-3p	Unigene0048952	At3g49730	444	4	2	0.018	2	2	Pentatricopeptide repeat-containing protein [Cynara cardunculus var. scolymus] [Cynara cardunculus]	-	-	-
novel-m0059-3p	Unigene0048020	GT-3B	323	3.5	2	0.018	4	2	PREDICTED: trihelix transcription factor GT-3b-like, partial [Vigna angularis]	GO:0044424//intracellular part;GO:0043227//membrane-bounded organelle;GO:0043231//intracellular membrane-bounded organelle;GO:0043226//organelle;GO:0044464//cell part;GO:0005622//intracellular;GO:0043229//intracellular organelle;GO:0005623//cell	GO:1901363//heterocyclic compound binding;GO:0097159//organic cyclic compound binding;GO:0001071//nucleic acid binding transcription factor activity;GO:0003676//nucleic acid binding;GO:0005488//binding;GO:0003677//DNA binding	GO:0044237//cellular metabolic process;GO:0071704//organic substance metabolic process;GO:0010468//regulation of gene expression;GO:0050789//regulation of biological process;GO:0009058//biosynthetic process;GO:0019222//regulation of metabolic process;GO:0043170//macromolecule metabolic process;GO:0065007//biological regulation;GO:0060255//regulation of macromolecule metabolic process;GO:1901576//…
novel-m0059-3p	Unigene0007239	-	116	2.5	2	0.018	2	2	Uncharacterized protein TCM_016791 [Theobroma cacao]	-	-	-
novel-m0059-3p	Unigene0052215	-	963	4.5	2	0.018	3	3	PREDICTED: zinc finger CCCH domain-containing protein 13 [Nelumbo nucifera]	-	-	-
novel-m0059-3p	Unigene0096654	At1g09380	197	3	2	0.018	5	5	PREDICTED: WAT1-related protein At1g09380-like [Musa acuminata subsp. malaccensis] [Musa acuminata]	-	-	-
novel-m0059-3p	Unigene0033143	At4g28440	668	4.5	2	0.018	3	3	PREDICTED: uncharacterized protein At4g28440 [Nelumbo nucifera]	-	-	-
novel-m0059-3p	Unigene0113355	At1g50920	980	4.5	2	0.018	5	5	PREDICTED: nucleolar GTP-binding protein 1-like [Nicotiana tabacum]	-	-	-
novel-m0059-3p	Unigene0072347	NAP1;2	431	4.5	2	0.018	12	12	PREDICTED: nucleosome assembly protein 1;4 [Vitis vinifera]	-	-	-
novel-m0059-3p	Unigene0070116	TBL2	68	4.5	2	0.018	2	2	PREDICTED: transducin beta-like protein 2 [Nelumbo nucifera]	-	-	-
novel-m0059-3p	Unigene0059552	CNGC2	893	4	2	0.018	4	4	PREDICTED: cyclic nucleotide-gated ion channel 2 [Nelumbo nucifera]	GO:0016020//membrane;GO:0031224//intrinsic component of membrane;GO:0044425//membrane part	-	GO:0044765//single-organism transport;GO:0044699//single-organism process;GO:1902578//single-organism localization;GO:0006810//transport;GO:0009987//cellular process;GO:0006811//ion transport;GO:0051179//localization;GO:0044763//single-organism cellular process;GO:0051234//establishment of localization
novel-m0059-3p	Unigene0061001	TULP5	1516	4.5	2	0.018	2	2	PREDICTED: tubby-like F-box protein 5 [Ziziphus jujuba]	GO:0044464//cell part;GO:0043231//intracellular membrane-bounded organelle;GO:0016020//membrane;GO:0043227//membrane-bounded organelle;GO:0044444//cytoplasmic part;GO:0044424//intracellular part;GO:0005737//cytoplasm;GO:0043226//organelle;GO:0005623//cell;GO:0005622//intracellular;GO:0043229//intracellular organelle	-	GO:0065007//biological regulation;GO:0010468//regulation of gene expression;GO:0051707//response to other organism;GO:0050789//regulation of biological process;GO:0009605//response to external stimulus;GO:0019222//regulation of metabolic process;GO:0009607//response to biotic stimulus;GO:0051704//multi-organism process;GO:0043207//response to external biotic stimulus;GO:0050896//response to stimu…
novel-m0059-3p	Unigene0093594	PCAP1	398	4	2	0.018	2	2	PREDICTED: plasma membrane-associated cation-binding protein 1 [Eucalyptus grandis]	-	-	-
novel-m0059-3p	Unigene0068990	GSNAP	1965	3	2	0.018	4	4	PREDICTED: gamma-soluble NSF attachment protein [Amborella trichopoda]	-	-	-
novel-m0059-3p	Unigene0104707	P4H3	227	4.5	2	0.018	2	2	PREDICTED: probable prolyl 4-hydroxylase 3 [Raphanus sativus]	GO:0005622//intracellular;GO:0012505//endomembrane system;GO:0044432//endoplasmic reticulum part;GO:0043229//intracellular organelle;GO:0031984//organelle subcompartment;GO:0044422//organelle part;GO:0044424//intracellular part;GO:0043226//organelle;GO:0044444//cytoplasmic part;GO:0043231//intracellular membrane-bounded organelle;GO:0005783//endoplasmic reticulum;GO:0005737//cytoplasm;GO:0043227/…	GO:0016491//oxidoreductase activity;GO:0003824//catalytic activity;GO:0036094//small molecule binding;GO:0043167//ion binding;GO:0043169//cation binding;GO:0046914//transition metal ion binding;GO:0019842//vitamin binding;GO:0046872//metal ion binding;GO:0016705//oxidoreductase activity, acting on paired donors, with incorporation or reduction of molecular oxygen;GO:0005488//binding	GO:0008152//metabolic process;GO:0044699//single-organism process;GO:0044710//single-organism metabolic process
novel-m0059-3p	Unigene0073438	DPE2	639	4	2	0.018	4	4	PREDICTED: 4-alpha-glucanotransferase DPE2 isoform X2 [Nelumbo nucifera]	-	-	-
novel-m0059-3p	Unigene0092187	CIPK6	528	2.5	2	0.018	7	7	PREDICTED: CBL-interacting serine/threonine-protein kinase 6-like [Nelumbo nucifera]	GO:0005623//cell;GO:0043231//intracellular membrane-bounded organelle;GO:0043227//membrane-bounded organelle;GO:0044464//cell part;GO:0005622//intracellular;GO:0044424//intracellular part;GO:0043229//intracellular organelle;GO:0043226//organelle	GO:0016301//kinase activity;GO:0032550//purine ribonucleoside binding;GO:0032549//ribonucleoside binding;GO:0016740//transferase activity;GO:0016772//transferase activity, transferring phosphorus-containing groups;GO:0036094//small molecule binding;GO:0005488//binding;GO:0001883//purine nucleoside binding;GO:0016773//phosphotransferase activity, alcohol group as acceptor;GO:0097367//carbohydrate …	GO:0010817//regulation of hormone levels;GO:0044237//cellular metabolic process;GO:0006810//transport;GO:0006464//cellular protein modification process;GO:0007154//cell communication;GO:0019932//second-messenger-mediated signaling;GO:0006793//phosphorus metabolic process;GO:0065008//regulation of biological quality;GO:0032501//multicellular organismal process;GO:0065007//biological regulation;GO:…
novel-m0059-3p	Unigene0032640	CHLP	533	2.5	2	0.018	2	2	pyridine nucleotide-disulfide oxidoreductase family protein [Populus tomentosa]	-	GO:0016491//oxidoreductase activity;GO:0003824//catalytic activity;GO:0016627//oxidoreductase activity, acting on the CH-CH group of donors	GO:1901566//organonitrogen compound biosynthetic process;GO:0009058//biosynthetic process;GO:0071704//organic substance metabolic process;GO:0018130//heterocycle biosynthetic process;GO:0006779//porphyrin-containing compound biosynthetic process;GO:0051188//cofactor biosynthetic process;GO:1901564//organonitrogen compound metabolic process;GO:0046483//heterocycle metabolic process;GO:1901362//org…
novel-m0059-3p	Unigene0066261	-	1042	4.5	2	0.018	7	7	PREDICTED: early endosome antigen 1 [Nelumbo nucifera]	-	-	-
novel-m0059-3p	Unigene0075890	Syncrip	5211	4	2	0.018	2	2	PREDICTED: nucleolin [Phoenix dactylifera]	-	-	-
novel-m0059-3p	Unigene0075692	Os06g0143900	531	3.5	2	0.018	3	3	PREDICTED: coatomer subunit beta'-1-like isoform X1 [Elaeis guineensis]	GO:0043234//protein complex;GO:0032991//macromolecular complex	-	GO:0006810//transport;GO:0071702//organic substance transport;GO:0015031//protein transport;GO:0045184//establishment of protein localization;GO:0051234//establishment of localization;GO:0008104//protein localization;GO:0051179//localization;GO:0033036//macromolecule localization
novel-m0059-3p	Unigene0113060	-	1088	4.5	2	0.018	3	3	PREDICTED: uncharacterized protein LOC100242564 [Vitis vinifera]	-	-	-
novel-m0059-3p	Unigene0047038	Rprd1b	465	3.5	2	0.018	2	2	PREDICTED: regulation of nuclear pre-mRNA domain-containing protein 1B-like [Nelumbo nucifera]	-	-	-
novel-m0059-3p	Unigene0049390	RS40	972	4.5	2	0.018	8	8	PREDICTED: serine/arginine-rich splicing factor RS41 isoform X1 [Nelumbo nucifera]	-	-	-
novel-m0059-3p	Unigene0111990	TAF8	314	4.5	2	0.018	3	3	PREDICTED: transcription initiation factor TFIID subunit 8-like [Nelumbo nucifera]	-	-	-
novel-m0059-3p	Unigene0044604	-	824	4.5	2	0.018	3	3	Protease precursor [Anthurium amnicola]	-	-	-
novel-m0059-3p	Unigene0034130	CURT1A	161	4.5	2	0.018	2	2	PREDICTED: protein CURVATURE THYLAKOID 1A, chloroplastic-like [Populus euphratica]	-	-	-
novel-m0059-3p	Unigene0086291	-	277	3.5	2	0.018	2	2	--	-	-	-
novel-m0059-3p	Unigene0010855	APUM3	78	4	2	0.018	2	2	PREDICTED: pumilio homolog 2-like [Nelumbo nucifera]	-	-	-
novel-m0059-3p	Unigene0048958	FKBP53	722	4.5	2	0.018	2	2	Peptidyl-prolyl cis-trans isomerase FKBP53 [Anthurium amnicola]	-	-	-
novel-m0059-3p	Unigene0009419	PCMP-H40	713	3	2	0.018	4	4	PREDICTED: pentatricopeptide repeat-containing protein At3g12770-like [Elaeis guineensis]	-	-	-
novel-m0059-3p	Unigene0010513	Os08g0360100	2908	4.5	2	0.018	3	3	PREDICTED: CRM-domain containing factor CFM3, chloroplastic/mitochondrial [Nelumbo nucifera]	-	-	-
novel-m0059-3p	Unigene0051720	RD21A	187	4.5	2	0.018	3	3	PREDICTED: low-temperature-induced cysteine proteinase [Vitis vinifera]	-	GO:0016787//hydrolase activity;GO:0070011//peptidase activity, acting on L-amino acid peptides;GO:0003824//catalytic activity;GO:0008233//peptidase activity	-
novel-m0059-3p	Unigene0075283	MBR1	484	4	2	0.018	2	1	PREDICTED: RING finger protein 165-like [Nelumbo nucifera]	-	-	-
novel-m0059-3p	Unigene0012436	ATX1	987	3.5	2	0.018	6	6	copper-binding family protein [Populus trichocarpa]	-	GO:0043167//ion binding;GO:0005488//binding;GO:0043169//cation binding	-
novel-m0059-3p	Unigene0046361	-	430	4.5	2	0.018	26	26	hypothetical protein PRUPE_ppa013160mg [Prunus persica]	-	-	-
novel-m0059-3p	Unigene0036495	MYB44	524	2.5	2	0.018	2	2	PREDICTED: transcription factor MYB44-like [Populus euphratica]	-	-	-
novel-m0059-3p	Unigene0000143	-	625	3.5	2	0.018	2	2	--	-	-	-
novel-m0059-3p	Unigene0045875	-	592	2.5	2	0.018	2	1	PREDICTED: heavy metal-associated isoprenylated plant protein 3-like [Nelumbo nucifera]	-	-	-
novel-m0059-3p	Unigene0089075	BKI1	280	4	2	0.018	3	3	PREDICTED: BRI1 kinase inhibitor 1-like [Phoenix dactylifera]	-	-	-
novel-m0059-3p	Unigene0083052	GIP	1607	4.5	2	0.018	3	3	Retrovirus-related Pol polyprotein from transposon TNT 1-94 [Cajanus cajan]	-	-	-
novel-m0059-3p	Unigene0057180	PRPF39	1653	4	2	0.018	3	3	PREDICTED: pre-mRNA-processing factor 39 isoform X2 [Musa acuminata subsp. malaccensis] [Musa acuminata]	-	-	GO:0043170//macromolecule metabolic process;GO:0010467//gene expression;GO:0071704//organic substance metabolic process;GO:0044237//cellular metabolic process;GO:0006807//nitrogen compound metabolic process;GO:0090304//nucleic acid metabolic process;GO:0044238//primary metabolic process;GO:0006396//RNA processing;GO:0006725//cellular aromatic compound metabolic process;GO:0008152//metabolic proce…
novel-m0059-3p	Unigene0008618	CNX1	1348	4.5	2	0.018	4	4	PREDICTED: calnexin homolog [Nelumbo nucifera]	GO:0043226//organelle;GO:0044464//cell part;GO:0043231//intracellular membrane-bounded organelle;GO:0005623//cell;GO:0043227//membrane-bounded organelle;GO:0043229//intracellular organelle;GO:0044424//intracellular part;GO:0005622//intracellular	GO:0005488//binding;GO:0005515//protein binding	GO:0009987//cellular process;GO:0044237//cellular metabolic process;GO:0044260//cellular macromolecule metabolic process;GO:0044238//primary metabolic process;GO:0019538//protein metabolic process;GO:0008152//metabolic process;GO:0071704//organic substance metabolic process;GO:0043170//macromolecule metabolic process;GO:0044267//cellular protein metabolic process
novel-m0059-3p	Unigene0005940	PIP5K1	77	4.5	2	0.018	2	2	Histone H3 K4-specific methyltransferase SET7/9 family protein [Theobroma cacao]	-	-	-
novel-m0059-3p	Unigene0094042	-	785	4.5	2	0.018	5	5	Aggrecan core protein [Anthurium amnicola]	-	-	-
novel-m0059-3p	Unigene0079464	-	68	4	2	0.018	2	2	--	-	-	-
novel-m0059-3p	Unigene0068905	UBA2	446	3.5	2	0.018	2	2	PREDICTED: ubiquitin-activating enzyme E1 1-like [Phoenix dactylifera]	-	-	-
novel-m0059-3p	Unigene0050063	Dnajb2	902	4.5	2	0.018	2	2	DnaJ domain-containing protein [Cephalotus follicularis]	-	-	-
novel-m0059-3p	Unigene0024781	At2g29290	1020	4	2	0.018	19	9.5	PREDICTED: tropinone reductase homolog At1g07440-like isoform X2 [Juglans regia]	-	GO:0003824//catalytic activity	-
novel-m0059-3p	Unigene0033676	RH10	199	4.5	2	0.018	2	1	PREDICTED: DEAD-box ATP-dependent RNA helicase 10 [Cucumis melo]	-	-	-
novel-m0059-3p	Unigene0071654	CUT1	450	4	2	0.018	2	2	Very-long-chain 3-ketoacyl-CoA synthase [Corchorus capsularis]	-	GO:0016746//transferase activity, transferring acyl groups;GO:0003824//catalytic activity;GO:0016740//transferase activity	GO:0006631//fatty acid metabolic process;GO:0043436//oxoacid metabolic process;GO:0044281//small molecule metabolic process;GO:0006082//organic acid metabolic process;GO:0008152//metabolic process;GO:0019752//carboxylic acid metabolic process;GO:0044710//single-organism metabolic process;GO:0044237//cellular metabolic process;GO:0071704//organic substance metabolic process;GO:0009987//cellular pr…
novel-m0059-3p	Unigene0024459	DAGLB	2467	4.5	2	0.018	4	4	Sn1-specific diacylglycerol lipase beta [Morus notabilis]	-	-	-
novel-m0059-3p	Unigene0058711	HSP70	779	3	2	0.018	6	6	PREDICTED: stromal 70 kDa heat shock-related protein, chloroplastic [Vitis vinifera]	-	GO:0016627//oxidoreductase activity, acting on the CH-CH group of donors;GO:0036094//small molecule binding;GO:0001883//purine nucleoside binding;GO:0016491//oxidoreductase activity;GO:0097367//carbohydrate derivative binding;GO:0005515//protein binding;GO:0001882//nucleoside binding;GO:0032549//ribonucleoside binding;GO:0005488//binding;GO:0032550//purine ribonucleoside binding;GO:0003824//catal…	GO:0019538//protein metabolic process;GO:0044699//single-organism process;GO:0008152//metabolic process;GO:0044237//cellular metabolic process;GO:0044710//single-organism metabolic process;GO:0044267//cellular protein metabolic process;GO:0044260//cellular macromolecule metabolic process;GO:0044238//primary metabolic process;GO:0071704//organic substance metabolic process;GO:0043170//macromolecul…
novel-m0059-3p	Unigene0061058	RF2b	2124	4.5	2	0.018	4	4	PREDICTED: probable serine/threonine-protein kinase mps1 [Nelumbo nucifera]	-	-	-
novel-m0059-3p	Unigene0019565	RANGAP1	1770	4.5	2	0.018	3	1.5	RAN GTPase-activating protein 1 [Anthurium amnicola]	-	-	-
novel-m0059-3p	Unigene0113927	-	310	4	2	0.018	2	2	PREDICTED: zinc-regulated protein 8-like [Gossypium raimondii]	-	-	-
novel-m0059-3p	Unigene0032576	Syncrip	1412	4	2	0.018	6	6	PREDICTED: heterogeneous nuclear ribonucleoprotein R [Nelumbo nucifera]	-	GO:0097159//organic cyclic compound binding;GO:0005488//binding	-
novel-m0059-3p	Unigene0063149	CLASRP	718	3	2	0.018	3	3	PREDICTED: CLK4-associating serine/arginine rich protein isoform X5 [Phoenix dactylifera]	-	-	-
novel-m0059-3p	Unigene0064613	Cdc40	1536	4.5	2	0.018	3	3	PREDICTED: pre-mRNA-processing factor 17 isoform X1 [Nelumbo nucifera]	-	-	-
novel-m0059-3p	Unigene0001247	At3g50690	630	4.5	2	0.018	5	5	Acidic leucine-rich nuclear phosphoprotein 32-related protein [Anthurium amnicola]	-	-	-
novel-m0059-3p	Unigene0006865	GIP	1513	4.5	2	0.018	2	2	integrase core domain containing protein [Phaseolus vulgaris]	-	-	-
novel-m0059-3p	Unigene0001247	At3g50690	796	4.5	2	0.018	3	3	Acidic leucine-rich nuclear phosphoprotein 32-related protein [Anthurium amnicola]	-	-	-
novel-m0059-3p	Unigene0069387	BHLH133	270	4.5	2	0.018	3	3	PREDICTED: transcription factor bHLH68-like [Nelumbo nucifera]	-	-	-
novel-m0059-3p	Unigene0020633	SCPL50	530	4.5	2	0.018	2	2	PREDICTED: serine carboxypeptidase-like 50 [Nelumbo nucifera]	-	GO:0008233//peptidase activity;GO:0070011//peptidase activity, acting on L-amino acid peptides;GO:0004180//carboxypeptidase activity;GO:0016787//hydrolase activity;GO:0008238//exopeptidase activity;GO:0003824//catalytic activity	GO:0071704//organic substance metabolic process;GO:0044238//primary metabolic process;GO:0008152//metabolic process;GO:0043170//macromolecule metabolic process;GO:0019538//protein metabolic process
novel-m0059-3p	Unigene0086995	-	87	4.5	2	0.018	5	2.5	--	-	-	-
novel-m0059-3p	Unigene0068378	CESA3	3691	4.5	2	0.018	3	3	PREDICTED: probable cellulose synthase A catalytic subunit 3 [UDP-forming] isoform X1 [Nelumbo nucifera]	-	-	-
novel-m0059-3p	Unigene0062616	DRB4	90	3.5	2	0.018	2	1	PREDICTED: double-stranded RNA-binding protein 4 isoform X3 [Vitis vinifera]	-	-	-
novel-m0059-3p	Unigene0081621	At1g65660	401	4.5	2	0.018	3	3	pre-mRNA-splicing factor SLU7 [Ananas comosus]	-	-	-
novel-m0059-3p	Unigene0075506	KCA2	410	4.5	2	0.018	3	3	PREDICTED: kinesin-like protein KIN-14B isoform X1 [Nelumbo nucifera]	GO:0005856//cytoskeleton;GO:0043226//organelle;GO:0043228//non-membrane-bounded organelle;GO:0005875//microtubule associated complex;GO:0043234//protein complex;GO:0032991//macromolecular complex;GO:0044430//cytoskeletal part;GO:0005623//cell;GO:0044424//intracellular part;GO:0005622//intracellular;GO:0043229//intracellular organelle;GO:0044464//cell part;GO:0044446//intracellular organelle part;…	GO:1901363//heterocyclic compound binding;GO:0036094//small molecule binding;GO:0097367//carbohydrate derivative binding;GO:0003824//catalytic activity;GO:0097159//organic cyclic compound binding;GO:0005515//protein binding;GO:0003774//motor activity;GO:0001883//purine nucleoside binding;GO:0016817//hydrolase activity, acting on acid anhydrides;GO:0016787//hydrolase activity;GO:0001882//nucleosid…	GO:0019750//chloroplast localization;GO:0051667//establishment of plastid localization;GO:0006996//organelle organization;GO:0051649//establishment of localization in cell;GO:0044763//single-organism cellular process;GO:0009658//chloroplast organization;GO:0009987//cellular process;GO:0051179//localization;GO:0009657//plastid organization;GO:0051641//cellular localization;GO:0051640//organelle lo…
novel-m0059-3p	Unigene0061280	ARF3	175	4.5	2	0.018	2	2	PREDICTED: auxin response factor 15-like isoform X4 [Phoenix dactylifera]	-	-	GO:0065007//biological regulation;GO:0044237//cellular metabolic process;GO:0007275//multicellular organism development;GO:0008152//metabolic process;GO:0010033//response to organic substance;GO:0009987//cellular process;GO:0042221//response to chemical;GO:0032502//developmental process;GO:0044767//single-organism developmental process;GO:0009791//post-embryonic development;GO:0050789//regulation…
novel-m0059-3p	Unigene0036157	-	874	4.5	2	0.018	6	6	titin homolog [Asparagus officinalis]	-	-	-
novel-m0059-3p	Unigene0024783	At2g29340	920	4	2	0.018	19	9.5	tropinone reductase homolog At5g06060-like isoform X3 [Asparagus officinalis]	-	-	-
novel-m0059-3p	Unigene0066855	RPS1	37	3.5	2	0.018	4	2	PREDICTED: 30S ribosomal protein S1, chloroplastic [Nelumbo nucifera]	GO:0044464//cell part;GO:0044424//intracellular part;GO:1990904//ribonucleoprotein complex;GO:0005623//cell;GO:0030529//intracellular ribonucleoprotein complex;GO:0005622//intracellular;GO:0032991//macromolecular complex	-	-
novel-m0059-3p	Unigene0102089	DJ1B	1322	4.5	2	0.018	3	3	PREDICTED: protein DJ-1 homolog B-like [Jatropha curcas]	-	GO:0003824//catalytic activity	-
novel-m0059-3p	Unigene0057985	CIPK24	193	4.5	2	0.018	3	3	PREDICTED: CBL-interacting serine/threonine-protein kinase 24 [Nelumbo nucifera]	GO:0043227//membrane-bounded organelle;GO:0016020//membrane;GO:0044424//intracellular part;GO:0044446//intracellular organelle part;GO:0044444//cytoplasmic part;GO:0098588//bounding membrane of organelle;GO:0005622//intracellular;GO:0044464//cell part;GO:0031090//organelle membrane;GO:0005623//cell;GO:0043229//intracellular organelle;GO:0043231//intracellular membrane-bounded organelle;GO:0005774…	GO:0001883//purine nucleoside binding;GO:0036094//small molecule binding;GO:0016301//kinase activity;GO:0016772//transferase activity, transferring phosphorus-containing groups;GO:0005515//protein binding;GO:0003824//catalytic activity;GO:0001882//nucleoside binding;GO:0097367//carbohydrate derivative binding;GO:0032550//purine ribonucleoside binding;GO:1901363//heterocyclic compound binding;GO:0…	GO:0019538//protein metabolic process;GO:0044267//cellular protein metabolic process;GO:0009628//response to abiotic stimulus;GO:0050896//response to stimulus;GO:0050789//regulation of biological process;GO:0006464//cellular protein modification process;GO:0044237//cellular metabolic process;GO:0043412//macromolecule modification;GO:0050794//regulation of cellular process;GO:0071704//organic subs…
novel-m0059-3p	Unigene0009737	COL5	885	4.5	2	0.018	3	3	PREDICTED: zinc finger protein CONSTANS-LIKE 5-like [Nelumbo nucifera]	-	-	-
novel-m0059-3p	Unigene0033201	UGT78D2	231	4	2	0.018	3	3	UDP-glucosyl transferase 78D2 [Arabidopsis thaliana]	-	GO:0016740//transferase activity;GO:0046527//glucosyltransferase activity;GO:0035251//UDP-glucosyltransferase activity;GO:0016758//transferase activity, transferring hexosyl groups;GO:0003824//catalytic activity;GO:0008194//UDP-glycosyltransferase activity;GO:0016757//transferase activity, transferring glycosyl groups	GO:0071704//organic substance metabolic process;GO:0009314//response to radiation;GO:0009628//response to abiotic stimulus;GO:0009058//biosynthetic process;GO:0050896//response to stimulus;GO:0009411//response to UV;GO:0009416//response to light stimulus;GO:0034285//response to disaccharide;GO:0042221//response to chemical;GO:1901576//organic substance biosynthetic process;GO:0010033//response to…
novel-m0059-3p	Unigene0045874	-	529	4.5	2	0.018	2	1	PREDICTED: heavy metal-associated isoprenylated plant protein 3-like [Nelumbo nucifera]	-	-	-
novel-m0059-3p	Unigene0072179	SQD2	302	4	2	0.018	3	3	PREDICTED: sulfoquinovosyl transferase SQD2 [Elaeis guineensis]	GO:0043231//intracellular membrane-bounded organelle;GO:0043226//organelle;GO:0031967//organelle envelope;GO:0044435//plastid part;GO:0005737//cytoplasm;GO:0043229//intracellular organelle;GO:0031975//envelope;GO:0044444//cytoplasmic part;GO:0044422//organelle part;GO:0005623//cell;GO:0044464//cell part;GO:0009536//plastid;GO:0009526//plastid envelope;GO:0005622//intracellular;GO:0044424//intrace…	GO:0016740//transferase activity;GO:0003824//catalytic activity;GO:0016757//transferase activity, transferring glycosyl groups	GO:0031667//response to nutrient levels;GO:1901566//organonitrogen compound biosynthetic process;GO:0009987//cellular process;GO:0008152//metabolic process;GO:1901135//carbohydrate derivative metabolic process;GO:0006725//cellular aromatic compound metabolic process;GO:0046467//membrane lipid biosynthetic process;GO:0006807//nitrogen compound metabolic process;GO:0044238//primary metabolic proces…
novel-m0059-3p	Unigene0053284	SMU2	341	2	2	0.018	3	3	PREDICTED: suppressor of mec-8 and unc-52 protein homolog 2 [Nelumbo nucifera]	-	-	GO:0044260//cellular macromolecule metabolic process;GO:0090304//nucleic acid metabolic process;GO:0009987//cellular process;GO:0008152//metabolic process;GO:1901360//organic cyclic compound metabolic process;GO:0010467//gene expression;GO:0044238//primary metabolic process;GO:0006139//nucleobase-containing compound metabolic process;GO:0046483//heterocycle metabolic process;GO:0044237//cellular …
novel-m0059-3p	Unigene0048018	GT-3B	323	3.5	2	0.018	4	2	PREDICTED: trihelix transcription factor GT-3b-like [Nelumbo nucifera]	-	-	-
novel-m0059-3p	Unigene0091088	-	240	4.5	2	0.018	2	2	PREDICTED: probable mitochondrial adenine nucleotide transporter BTL3 [Nelumbo nucifera]	-	-	-
novel-m0059-3p	Unigene0072798	-	534	4	2	0.018	3	3	--	-	-	-
novel-m0059-3p	Unigene0105945	-	228	4.5	2	0.018	5	5	PREDICTED: uncharacterized protein LOC102609846 [Citrus sinensis]	GO:0043227//membrane-bounded organelle;GO:0005622//intracellular;GO:0009536//plastid;GO:0043226//organelle;GO:0044446//intracellular organelle part;GO:0044424//intracellular part;GO:0044422//organelle part;GO:0005737//cytoplasm;GO:0009532//plastid stroma;GO:0044444//cytoplasmic part;GO:0044464//cell part;GO:0043231//intracellular membrane-bounded organelle;GO:0044435//plastid part;GO:0005623//cel…	-	GO:0071822//protein complex subunit organization;GO:0043623//cellular protein complex assembly;GO:0034622//cellular macromolecular complex assembly;GO:0022607//cellular component assembly;GO:0070271//protein complex biogenesis;GO:0009987//cellular process;GO:0065003//macromolecular complex assembly;GO:0016043//cellular component organization;GO:0006461//protein complex assembly;GO:0071840//cellul…
novel-m0059-3p	Unigene0109606	RABA5B	759	4.5	2	0.018	2	2	PREDICTED: ras-related protein RABA5d-like [Populus euphratica]	-	GO:0001883//purine nucleoside binding;GO:0032549//ribonucleoside binding;GO:0032550//purine ribonucleoside binding;GO:0003824//catalytic activity;GO:0097367//carbohydrate derivative binding;GO:0036094//small molecule binding;GO:1901363//heterocyclic compound binding;GO:0005488//binding;GO:0001882//nucleoside binding;GO:0097159//organic cyclic compound binding	GO:0065007//biological regulation;GO:0050794//regulation of cellular process;GO:0033036//macromolecule localization;GO:0051179//localization;GO:0007154//cell communication;GO:0050896//response to stimulus;GO:0035556//intracellular signal transduction;GO:0044700//single organism signaling;GO:0051716//cellular response to stimulus;GO:0050789//regulation of biological process;GO:0007165//signal tran…
novel-m0059-3p	Unigene0060970	MSSP2	1209	3.5	2	0.018	2	2	PREDICTED: monosaccharide-sensing protein 2-like [Phoenix dactylifera]	GO:0031224//intrinsic component of membrane;GO:0044425//membrane part;GO:0016020//membrane	GO:0005215//transporter activity;GO:0022857//transmembrane transporter activity	GO:0051179//localization;GO:0044699//single-organism process;GO:0009987//cellular process;GO:0044763//single-organism cellular process;GO:0051234//establishment of localization
novel-m0059-3p	Unigene0051664	CRK42	450	4.5	2	0.018	2	2	PREDICTED: cysteine-rich receptor-like protein kinase 42 [Nelumbo nucifera]	GO:0016020//membrane	GO:0004672//protein kinase activity;GO:0003824//catalytic activity;GO:0016773//phosphotransferase activity, alcohol group as acceptor;GO:0016740//transferase activity;GO:0016301//kinase activity;GO:0016772//transferase activity, transferring phosphorus-containing groups	GO:0006793//phosphorus metabolic process;GO:0006796//phosphate-containing compound metabolic process;GO:0044237//cellular metabolic process;GO:0009987//cellular process;GO:0008152//metabolic process
novel-m0059-3p	Unigene0000602	-	134	4.5	2	0.018	3	3	--	-	-	-
novel-m0059-3p	Unigene0042884	ICR1	1086	4.5	2	0.018	3	1.5	PREDICTED: interactor of constitutive active ROPs 4-like [Nelumbo nucifera]	-	-	-
novel-m0059-3p	Unigene0054625	-	1347	4	2	0.018	2	2	PREDICTED: serine/arginine repetitive matrix protein 1-like [Nelumbo nucifera]	-	-	-
novel-m0059-3p	Unigene0018579	SAP4	21	3	2	0.018	2	1	PREDICTED: zinc finger A20 and AN1 domain-containing stress-associated protein 4 [Vitis vinifera]	-	-	-
novel-m0059-3p	Unigene0039832	lsm12a	775	4.5	2	0.018	4	4	PREDICTED: protein LSM12 homolog A [Nelumbo nucifera]	-	-	-
novel-m0059-3p	Unigene0068904	UBA2	443	3	2	0.018	10	10	PREDICTED: ubiquitin-activating enzyme E1 1 isoform X1 [Elaeis guineensis]	-	-	-
novel-m0059-3p	Unigene0009079	CRT3	811	4	2	0.018	3	3	PREDICTED: calreticulin-3-like [Musa acuminata subsp. malaccensis] [Musa acuminata]	GO:0005623//cell;GO:0005622//intracellular;GO:0044424//intracellular part;GO:0043231//intracellular membrane-bounded organelle;GO:0044464//cell part;GO:0043227//membrane-bounded organelle;GO:0043226//organelle;GO:0043229//intracellular organelle	GO:0005515//protein binding;GO:0005488//binding	GO:0044238//primary metabolic process;GO:0009987//cellular process;GO:0044237//cellular metabolic process;GO:0044267//cellular protein metabolic process;GO:0071704//organic substance metabolic process;GO:0008152//metabolic process;GO:0019538//protein metabolic process;GO:0043170//macromolecule metabolic process;GO:0044260//cellular macromolecule metabolic process
novel-m0059-3p	Unigene0062614	-	90	3.5	2	0.018	2	1	--	-	-	-
novel-m0059-3p	Unigene0055684	PI4KB1	3092	4	2	0.018	2	1	PREDICTED: LOW QUALITY PROTEIN: phosphatidylinositol 4-kinase beta 1 [Phoenix dactylifera]	-	GO:0016772//transferase activity, transferring phosphorus-containing groups;GO:0003824//catalytic activity;GO:0016740//transferase activity	GO:0009987//cellular process;GO:0006629//lipid metabolic process;GO:0044238//primary metabolic process;GO:0019637//organophosphate metabolic process;GO:0046488//phosphatidylinositol metabolic process;GO:0006796//phosphate-containing compound metabolic process;GO:0044763//single-organism cellular process;GO:0008152//metabolic process;GO:0006644//phospholipid metabolic process;GO:0006793//phosphoru…
novel-m0059-3p	Unigene0060968	MSSP2	1236	3.5	2	0.018	24	24	PREDICTED: monosaccharide-sensing protein 2 [Nelumbo nucifera]	GO:0016020//membrane;GO:0044425//membrane part;GO:0031224//intrinsic component of membrane	GO:0016627//oxidoreductase activity, acting on the CH-CH group of donors;GO:0003824//catalytic activity;GO:0005215//transporter activity;GO:0022857//transmembrane transporter activity;GO:0016491//oxidoreductase activity;GO:0016628//oxidoreductase activity, acting on the CH-CH group of donors, NAD or NADP as acceptor	GO:0044699//single-organism process;GO:0044763//single-organism cellular process;GO:1902578//single-organism localization;GO:0008152//metabolic process;GO:0006810//transport;GO:0051179//localization;GO:0044710//single-organism metabolic process;GO:0044765//single-organism transport;GO:0009987//cellular process;GO:0051234//establishment of localization
novel-m0059-3p	Unigene0093136	CCB1	191	4	2	0.018	3	3	PREDICTED: protein COFACTOR ASSEMBLY OF COMPLEX C SUBUNIT B CCB1, chloroplastic [Vitis vinifera]	-	-	GO:0044085//cellular component biogenesis;GO:0016043//cellular component organization;GO:0044237//cellular metabolic process;GO:0009657//plastid organization;GO:0034622//cellular macromolecular complex assembly;GO:0071822//protein complex subunit organization;GO:0070271//protein complex biogenesis;GO:0043623//cellular protein complex assembly;GO:0043933//macromolecular complex subunit organizatio…
novel-m0059-3p	Unigene0075391	CER1	1118	4.5	2	0.018	6	6	PREDICTED: protein ECERIFERUM 1-like [Nelumbo nucifera]	-	-	-
novel-m0059-3p	Unigene0053575	-	320	3.5	2	0.018	4	4	PREDICTED: uncharacterized protein LOC104595572 [Nelumbo nucifera]	-	-	-
novel-m0059-3p	Unigene0087424	Os04g0666900	370	4	2	0.018	3	3	PREDICTED: kinesin-like calmodulin-binding protein homolog isoform X1 [Nelumbo nucifera]	GO:0005622//intracellular;GO:0044422//organelle part;GO:0044464//cell part;GO:0043232//intracellular non-membrane-bounded organelle;GO:0044424//intracellular part;GO:0044446//intracellular organelle part;GO:0005856//cytoskeleton;GO:0005875//microtubule associated complex;GO:0032991//macromolecular complex;GO:0015630//microtubule cytoskeleton;GO:0044430//cytoskeletal part;GO:0043226//organelle;GO:…	GO:0001882//nucleoside binding;GO:0097159//organic cyclic compound binding;GO:0005515//protein binding;GO:0005488//binding;GO:0032550//purine ribonucleoside binding;GO:0008092//cytoskeletal protein binding;GO:0003774//motor activity;GO:1901363//heterocyclic compound binding;GO:0017111//nucleoside-triphosphatase activity;GO:0016462//pyrophosphatase activity;GO:0016817//hydrolase activity, acting o…	GO:0044763//single-organism cellular process;GO:0007017//microtubule-based process;GO:0044699//single-organism process;GO:0009987//cellular process;GO:0008152//metabolic process;GO:0044710//single-organism metabolic process
novel-m0059-3p	Unigene0045422	BETAA-AD	41	4.5	2	0.018	2	2	PREDICTED: beta-adaptin-like protein A [Cucumis sativus]	-	-	-
novel-m0059-3p	Unigene0006037	KIN12B	662	4	2	0.018	2	2	PREDICTED: kinesin-like protein KIN12B [Cucumis sativus]	GO:0043234//protein complex;GO:0043226//organelle;GO:0043228//non-membrane-bounded organelle;GO:0032991//macromolecular complex;GO:0044430//cytoskeletal part;GO:0043229//intracellular organelle;GO:0005623//cell;GO:0044424//intracellular part;GO:0005622//intracellular;GO:0044464//cell part;GO:0005856//cytoskeleton;GO:0005875//microtubule associated complex;GO:0043232//intracellular non-membrane-bo…	GO:0003774//motor activity;GO:0016817//hydrolase activity, acting on acid anhydrides;GO:0016818//hydrolase activity, acting on acid anhydrides, in phosphorus-containing anhydrides;GO:0001883//purine nucleoside binding;GO:0008092//cytoskeletal protein binding;GO:0017111//nucleoside-triphosphatase activity;GO:0036094//small molecule binding;GO:0005515//protein binding;GO:0005488//binding;GO:0015631…	GO:2001141//regulation of RNA biosynthetic process;GO:0018193//peptidyl-amino acid modification;GO:1903506//regulation of nucleic acid-templated transcription;GO:0006342//chromatin silencing;GO:0010468//regulation of gene expression;GO:0060255//regulation of macromolecule metabolic process;GO:0051171//regulation of nitrogen compound metabolic process;GO:0045814//negative regulation of gene expres…
novel-m0059-3p	Unigene0038322	-	512	4.5	2	0.018	3	3	PREDICTED: ABC transporter F family member 4-like [Daucus carota subsp. sativus] [Daucus carota]	-	-	-
novel-m0059-3p	Unigene0091989	PDAP1	509	4.5	2	0.018	27	27	PREDICTED: 28 kDa heat- and acid-stable phosphoprotein [Jatropha curcas]	-	-	-
novel-m0059-3p	Unigene0051428	UGT89B1	326	4	2	0.018	2	2	PREDICTED: UDP-glycosyltransferase 89B2-like [Nelumbo nucifera]	-	GO:0003824//catalytic activity;GO:0016757//transferase activity, transferring glycosyl groups;GO:0016740//transferase activity	-
novel-m0059-3p	Unigene0097602	-	313	4.5	2	0.018	3	3	PREDICTED: MAP7 domain-containing protein 1-like [Vigna angularis]	-	-	-
novel-m0059-3p	Unigene0055705	-	1765	4.5	2	0.018	3	3	PREDICTED: titin [Beta vulgaris subsp. vulgaris] [Beta vulgaris]	-	-	-
novel-m0059-3p	Unigene0055528	GPT2	614	4.5	2	0.018	4	4	PREDICTED: glucose-6-phosphate/phosphate translocator 2, chloroplastic-like [Nelumbo nucifera]	GO:0044425//membrane part;GO:0016020//membrane;GO:0031224//intrinsic component of membrane	-	GO:0051234//establishment of localization;GO:0051179//localization
novel-m0059-3p	Unigene0010327	-	603	4	2	0.018	2	2	WRC domain-containing protein [Cephalotus follicularis]	-	-	-
novel-m0059-3p	Unigene0054592	NUDT16	752	4	2	0.018	4	4	PREDICTED: nudix hydrolase 16, mitochondrial isoform X1 [Elaeis guineensis]	-	-	-
novel-m0059-3p	Unigene0035326	AAP2	1039	4.5	2	0.018	2	2	PREDICTED: amino acid permease 3 [Nelumbo nucifera]	GO:0016020//membrane;GO:0044425//membrane part;GO:0031224//intrinsic component of membrane	-	-
novel-m0059-3p	Unigene0084401	-	109	4	2	0.018	6	3	--	-	-	-
novel-m0059-3p	Unigene0019263	-	636	3.5	2	0.018	3	3	PREDICTED: centrosomal protein of 290 kDa-like isoform X2 [Nelumbo nucifera]	-	-	-
novel-m0059-3p	Unigene0040590	DHN3	578	4	2	0.018	1366	1366	PREDICTED: dehydrin Xero 2 [Fragaria vesca subsp. vesca] [Fragaria vesca]	-	-	-
novel-m0059-3p	Unigene0044956	HST	586	4	2	0.018	6	6	PREDICTED: shikimate O-hydroxycinnamoyltransferase [Nelumbo nucifera]	-	-	-
novel-m0059-3p	Unigene0016683	TOGT1	591	3.5	2	0.018	8	4	PREDICTED: scopoletin glucosyltransferase [Theobroma cacao]	-	GO:0016757//transferase activity, transferring glycosyl groups;GO:0003824//catalytic activity;GO:0016740//transferase activity	-
novel-m0059-3p	Unigene0043048	-	682	4.5	2	0.018	3	3	PREDICTED: auxilin-related protein 1 [Musa acuminata subsp. malaccensis] [Musa acuminata]	-	-	-
novel-m0059-3p	Unigene0068492	IMPA2	1045	4	2	0.018	4	4	PREDICTED: importin subunit alpha-1 [Nelumbo nucifera]	GO:0005622//intracellular;GO:0005623//cell;GO:0044424//intracellular part;GO:0044464//cell part	GO:0022892//substrate-specific transporter activity;GO:0005215//transporter activity	GO:0006886//intracellular protein transport;GO:0046907//intracellular transport;GO:0051234//establishment of localization;GO:0070727//cellular macromolecule localization;GO:0045184//establishment of protein localization;GO:0051649//establishment of localization in cell;GO:0051179//localization;GO:0006810//transport;GO:0008104//protein localization;GO:0033036//macromolecule localization;GO:0051641…
novel-m0059-3p	Unigene0082460	MLO1	332	4.5	2	0.018	2	2	MLO-like protein 1 [Anthurium amnicola]	GO:0043231//intracellular membrane-bounded organelle;GO:0044464//cell part;GO:0016020//membrane;GO:0044424//intracellular part;GO:0044425//membrane part;GO:0031224//intrinsic component of membrane;GO:0043226//organelle;GO:0043229//intracellular organelle;GO:0043227//membrane-bounded organelle;GO:0005623//cell;GO:0005622//intracellular	-	-
novel-m0059-3p	Unigene0045819	-	1365	3.5	2	0.018	2	2	PREDICTED: midasin-like [Nelumbo nucifera]	-	-	-
novel-m0059-3p	Unigene0078124	CRNKL1	1804	4	2	0.018	6	6	PREDICTED: crooked neck-like protein 1 [Phoenix dactylifera]	-	-	GO:0016070//RNA metabolic process;GO:1901360//organic cyclic compound metabolic process;GO:0006725//cellular aromatic compound metabolic process;GO:0043170//macromolecule metabolic process;GO:0006807//nitrogen compound metabolic process;GO:0090304//nucleic acid metabolic process;GO:0006139//nucleobase-containing compound metabolic process;GO:0044260//cellular macromolecule metabolic process;GO:00…
novel-m0059-3p	Unigene0096418	CUT1	524	3	2	0.018	4	4	Very-long-chain 3-ketoacyl-CoA synthase [Corchorus capsularis]	-	GO:0003824//catalytic activity;GO:0016740//transferase activity;GO:0016746//transferase activity, transferring acyl groups	GO:0044281//small molecule metabolic process;GO:0043436//oxoacid metabolic process;GO:0032787//monocarboxylic acid metabolic process;GO:0019752//carboxylic acid metabolic process;GO:0006082//organic acid metabolic process;GO:0044763//single-organism cellular process;GO:0008152//metabolic process;GO:0044238//primary metabolic process;GO:0009987//cellular process;GO:0044710//single-organism metabol…
novel-m0059-3p	Unigene0062635	SPL16	2137	4	2	0.018	3	3	PREDICTED: squamosa promoter-binding-like protein 16 [Phoenix dactylifera]	-	-	-
novel-m0059-3p	Unigene0083193	At5g26707	1343	4.5	2	0.018	4	4	PREDICTED: glutamate--tRNA ligase, cytoplasmic [Nelumbo nucifera]	GO:0044424//intracellular part;GO:0005623//cell;GO:0044464//cell part;GO:0005737//cytoplasm;GO:0005622//intracellular;GO:0044444//cytoplasmic part	GO:0097159//organic cyclic compound binding;GO:0036094//small molecule binding;GO:0016874//ligase activity;GO:0001882//nucleoside binding;GO:0032549//ribonucleoside binding;GO:0032550//purine ribonucleoside binding;GO:0016876//ligase activity, forming aminoacyl-tRNA and related compounds;GO:0005488//binding;GO:0003824//catalytic activity;GO:1901363//heterocyclic compound binding;GO:0001883//purin…	GO:0009059//macromolecule biosynthetic process;GO:0006996//organelle organization;GO:0043038//amino acid activation;GO:0043436//oxoacid metabolic process;GO:1901564//organonitrogen compound metabolic process;GO:1901576//organic substance biosynthetic process;GO:0006006//glucose metabolic process;GO:0006725//cellular aromatic compound metabolic process;GO:0030163//protein catabolic process;GO:0044…
novel-m0059-3p	Unigene0092331	PCMP-H61	1192	4.5	2	0.018	4	4	PREDICTED: pentatricopeptide repeat-containing protein At5g66520-like [Nelumbo nucifera]	-	-	-
novel-m0059-3p	Unigene0061502	-	284	4	2	0.018	14	14	PREDICTED: homeobox-DDT domain protein RLT2-like isoform X1 [Nelumbo nucifera]	-	-	-
novel-m0059-3p	Unigene0105485	GPX1	48	4.5	2	0.018	3	3	PREDICTED: probable phospholipid hydroperoxide glutathione peroxidase [Nelumbo nucifera]	-	GO:0016684//oxidoreductase activity, acting on peroxide as acceptor;GO:0016491//oxidoreductase activity;GO:0003824//catalytic activity;GO:0016209//antioxidant activity;GO:0004601//peroxidase activity	GO:0050896//response to stimulus;GO:0008152//metabolic process;GO:0006950//response to stress;GO:0044710//single-organism metabolic process;GO:0044699//single-organism process
novel-m0059-3p	Unigene0063532	PABN2	991	4	2	0.018	2	2	PREDICTED: polyadenylate-binding protein 2-like isoform X1 [Phoenix dactylifera]	-	GO:0005488//binding;GO:0097159//organic cyclic compound binding	-
novel-m0059-3p	Unigene0042732	DOT4	398	4	2	0.018	3	3	pentatricopeptide repeat-containing family protein [Populus trichocarpa]	-	-	-
novel-m0059-3p	Unigene0085202	MOM1	5907	3.5	2	0.018	2	2	PREDICTED: helicase protein MOM1 isoform X1 [Vitis vinifera]	-	-	-
novel-m0059-3p	Unigene0092151	CpNIFS3	77	3.5	2	0.018	5	5	PREDICTED: L-cysteine desulfhydrase-like [Nelumbo nucifera]	-	GO:0043168//anion binding;GO:0043167//ion binding;GO:0016855//racemase and epimerase activity, acting on amino acids and derivatives;GO:0016854//racemase and epimerase activity;GO:0003824//catalytic activity;GO:0016853//isomerase activity;GO:0005488//binding	-
novel-m0059-3p	Unigene0075226	ccdc94	1096	4	2	0.018	3	3	PREDICTED: coiled-coil domain-containing protein 94 homolog [Glycine max]	-	-	-
novel-m0059-3p	Unigene0081679	UGGT	1364	4	2	0.018	2	2	UDP-glucose glycoprotein glucosyltransferase [Camellia sinensis]	-	-	-
novel-m0059-3p	Unigene0006685	At3g49055	1178	4	2	0.018	2	2	PREDICTED: myosin-4-like [Nelumbo nucifera]	-	-	GO:1902578//single-organism localization;GO:0071704//organic substance metabolic process;GO:0006464//cellular protein modification process;GO:0009606//tropism;GO:0050896//response to stimulus;GO:0030001//metal ion transport;GO:0043412//macromolecule modification;GO:0044260//cellular macromolecule metabolic process;GO:0036211//protein modification process;GO:0044238//primary metabolic process;GO:0…
novel-m0059-3p	Unigene0088809	GAUT9	85	4.5	2	0.018	4	4	PREDICTED: probable galacturonosyltransferase 9 [Juglans regia]	GO:0044424//intracellular part;GO:0044422//organelle part;GO:0044464//cell part;GO:0016020//membrane;GO:0005622//intracellular;GO:0043226//organelle;GO:0043227//membrane-bounded organelle;GO:0005623//cell;GO:0044446//intracellular organelle part;GO:0043229//intracellular organelle;GO:0043231//intracellular membrane-bounded organelle	GO:0016740//transferase activity;GO:0003824//catalytic activity;GO:0016757//transferase activity, transferring glycosyl groups	-
novel-m0059-3p	Unigene0040421	CPRF1	540	3	2	0.018	5	2.5	PREDICTED: common plant regulatory factor 1-like [Phoenix dactylifera]	-	-	-
novel-m0059-3p	Unigene0083960	RPL1	102	3	2	0.018	6	3	50S ribosomal protein L1, chloroplastic, partial [Noccaea caerulescens]	-	-	-
novel-m0059-3p	Unigene0011482	ELC	781	4.5	2	0.018	5	5	PREDICTED: protein ELC-like [Nelumbo nucifera]	-	-	GO:0033036//macromolecule localization;GO:0051179//localization;GO:0008104//protein localization
novel-m0059-3p	Unigene0067370	B3GALT7	11	4.5	2	0.018	4	1.33333	PREDICTED: beta-1,3-galactosyltransferase 7 [Nelumbo nucifera]	GO:0044425//membrane part;GO:0031224//intrinsic component of membrane;GO:0016020//membrane	GO:0016740//transferase activity;GO:0016758//transferase activity, transferring hexosyl groups;GO:0003824//catalytic activity;GO:0016757//transferase activity, transferring glycosyl groups	GO:0071704//organic substance metabolic process;GO:0044260//cellular macromolecule metabolic process;GO:0009987//cellular process;GO:0044267//cellular protein metabolic process;GO:0043170//macromolecule metabolic process;GO:0019538//protein metabolic process;GO:0036211//protein modification process;GO:0044238//primary metabolic process;GO:0008152//metabolic process;GO:0043412//macromolecule modif…
novel-m0059-3p	Unigene0018630	-	1015	4	2	0.018	3	3	PREDICTED: uncharacterized protein LOC100266500 [Vitis vinifera]	-	-	-
novel-m0059-3p	Unigene0082762	At4g12770	2621	4	2	0.018	2	2	PREDICTED: auxilin-like protein 1 [Nelumbo nucifera]	-	-	-
novel-m0059-3p	Unigene0103832	EXL3	694	4.5	2	0.018	3	3	PREDICTED: protein EXORDIUM-like 3 [Nelumbo nucifera]	GO:0030054//cell junction;GO:0030312//external encapsulating structure;GO:0005618//cell wall;GO:0071944//cell periphery;GO:0044464//cell part;GO:0005623//cell;GO:0005911//cell-cell junction	-	-
novel-m0059-3p	Unigene0060815	-	181	4.5	2	0.018	4	4	--	-	-	-
novel-m0059-3p	Unigene0049954	At3g62120	1737	4	2	0.018	5	5	PREDICTED: proline--tRNA ligase, cytoplasmic-like [Capsicum annuum]	-	-	-
novel-m0059-3p	Unigene0057960	-	370	4.5	2	0.018	2	2	DUF1218 domain-containing protein, partial [Cephalotus follicularis]	-	-	GO:0044237//cellular metabolic process;GO:0045491//xylan metabolic process;GO:0010410//hemicellulose metabolic process;GO:0005975//carbohydrate metabolic process;GO:0071554//cell wall organization or biogenesis;GO:0044036//cell wall macromolecule metabolic process;GO:0071704//organic substance metabolic process;GO:0044260//cellular macromolecule metabolic process;GO:0043170//macromolecule metabol…
novel-m0059-3p	Unigene0066843	RPS1	37	3.5	2	0.018	4	2	PREDICTED: 30S ribosomal protein S1, chloroplastic [Nelumbo nucifera]	GO:0043227//membrane-bounded organelle;GO:0043231//intracellular membrane-bounded organelle;GO:0043226//organelle;GO:0032991//macromolecular complex;GO:0044422//organelle part;GO:0044446//intracellular organelle part;GO:0005737//cytoplasm;GO:0044424//intracellular part;GO:0005622//intracellular;GO:0009532//plastid stroma;GO:0044444//cytoplasmic part;GO:0005623//cell;GO:0044435//plastid part;GO:00…	GO:0097159//organic cyclic compound binding;GO:0005198//structural molecule activity;GO:0003676//nucleic acid binding;GO:0005488//binding;GO:1901363//heterocyclic compound binding	GO:0006778//porphyrin-containing compound metabolic process;GO:0033013//tetrapyrrole metabolic process;GO:0019684//photosynthesis, light reaction;GO:0019438//aromatic compound biosynthetic process;GO:0071704//organic substance metabolic process;GO:0044271//cellular nitrogen compound biosynthetic process;GO:0051186//cofactor metabolic process;GO:0016043//cellular component organization;GO:0019752/…
novel-m0059-3p	Unigene0103848	-	1261	4.5	2	0.018	2	2	PREDICTED: stress response protein NST1 [Jatropha curcas]	-	-	GO:0044767//single-organism developmental process;GO:0050789//regulation of biological process;GO:0044707//single-multicellular organism process;GO:0032501//multicellular organismal process;GO:0050794//regulation of cellular process;GO:0007275//multicellular organism development;GO:0044699//single-organism process;GO:0065007//biological regulation;GO:0032502//developmental process
novel-m0059-3p	Unigene0090758	ostc	169	4.5	2	0.018	4	4	PREDICTED: oligosaccharyltransferase complex subunit ostc-like [Ipomoea nil]	GO:0016020//membrane	GO:0003824//catalytic activity	GO:0008152//metabolic process;GO:0044763//single-organism cellular process;GO:0009404//toxin metabolic process;GO:0044710//single-organism metabolic process;GO:0009987//cellular process;GO:0044237//cellular metabolic process;GO:0044699//single-organism process;GO:0019748//secondary metabolic process
novel-m0059-3p	Unigene0059817	GAE2	23	4.5	2	0.018	2	2	PREDICTED: UDP-glucuronate 4-epimerase 3 [Citrus sinensis]	GO:0016020//membrane;GO:0005737//cytoplasm;GO:0005622//intracellular;GO:0044425//membrane part;GO:0031090//organelle membrane;GO:0044431//Golgi apparatus part;GO:0044422//organelle part;GO:0043229//intracellular organelle;GO:0043226//organelle;GO:0031224//intrinsic component of membrane;GO:0098588//bounding membrane of organelle;GO:0044424//intracellular part;GO:0005623//cell;GO:0044444//cytoplas…	GO:0048037//cofactor binding;GO:0005488//binding;GO:0003824//catalytic activity;GO:0016857//racemase and epimerase activity, acting on carbohydrates and derivatives;GO:0016853//isomerase activity;GO:0016854//racemase and epimerase activity	GO:0008152//metabolic process;GO:0044238//primary metabolic process
novel-m0059-3p	Unigene0018578	SAP4	21	3	2	0.018	2	1	PREDICTED: zinc finger A20 and AN1 domain-containing stress-associated protein 4 [Vitis vinifera]	-	-	-
novel-m0059-3p	Unigene0048016	GT-3B	255	3.5	2	0.018	2	2	PREDICTED: trihelix transcription factor GT-3b-like [Vigna radiata var. radiata] [Vigna radiata]	-	-	-
novel-m0059-3p	Unigene0033674	RH10	199	4.5	2	0.018	2	1	PREDICTED: DEAD-box ATP-dependent RNA helicase 10 [Cucumis melo]	-	-	-
novel-m0059-3p	Unigene0100965	-	259	4.5	2	0.018	2	2	HIGH CHLOROPHYLL FLUORESCENCE 153-like protein [Solanum lycopersicum]	-	-	-
novel-m0059-3p	Unigene0001899	-	307	3.5	2	0.018	2	2	--	-	-	-
novel-m0059-3p	Unigene0072564	-	170	4	2	0.018	2	2	PREDICTED: protein MIS12 homolog [Vitis vinifera]	-	-	-
novel-m0059-3p	Unigene0065296	RPS7	559	4	2	0.018	11	11	PREDICTED: 40S ribosomal protein S7 [Nelumbo nucifera]	GO:0044424//intracellular part;GO:0005623//cell;GO:0044464//cell part;GO:0005622//intracellular;GO:1990904//ribonucleoprotein complex;GO:0032991//macromolecular complex;GO:0030529//intracellular ribonucleoprotein complex	-	GO:0071704//organic substance metabolic process;GO:0010467//gene expression;GO:0008152//metabolic process;GO:0043170//macromolecule metabolic process
novel-m0059-3p	Unigene0049507	SPL15	2195	4	2	0.018	2	2	PREDICTED: squamosa promoter-binding-like protein 14 [Nelumbo nucifera]	-	-	-
novel-m0059-3p	Unigene0075644	DRP2B	1644	3.5	2	0.018	3	3	PREDICTED: dynamin-2A-like [Phoenix dactylifera]	-	-	-
novel-m0059-3p	Unigene0104597	PREP	891	4	2	0.018	2	2	PREDICTED: prolyl endopeptidase-like [Nelumbo nucifera]	-	GO:0017171//serine hydrolase activity;GO:0008233//peptidase activity;GO:0003824//catalytic activity;GO:0008236//serine-type peptidase activity;GO:0016787//hydrolase activity;GO:0070011//peptidase activity, acting on L-amino acid peptides	GO:0044238//primary metabolic process;GO:0019538//protein metabolic process;GO:0008152//metabolic process;GO:0043170//macromolecule metabolic process;GO:0071704//organic substance metabolic process
novel-m0059-3p	Unigene0050928	At1g64390	260	4.5	2	0.018	6	6	PREDICTED: endoglucanase 19 [Nelumbo nucifera]	-	-	-
novel-m0059-3p	Unigene0054516	-	454	4	2	0.018	6	3	--	-	-	-
novel-m0059-3p	Unigene0011124	xt	223	3.5	2	0.018	5	5	PREDICTED: beta-glucuronosyltransferase GlcAT14A [Nelumbo nucifera]	-	GO:0008194//UDP-glycosyltransferase activity;GO:0003824//catalytic activity;GO:0016757//transferase activity, transferring glycosyl groups;GO:0016740//transferase activity	GO:0071704//organic substance metabolic process;GO:0008152//metabolic process
novel-m0059-3p	Unigene0045875	-	529	4.5	2	0.018	2	1	PREDICTED: heavy metal-associated isoprenylated plant protein 3-like [Nelumbo nucifera]	-	-	-
novel-m0059-3p	Unigene0043422	-	2492	4.5	2	0.018	3	3	PREDICTED: hornerin-like isoform X3 [Phoenix dactylifera]	-	-	-
novel-m0059-3p	Unigene0053625	OMR1	2076	4	2	0.018	2	2	PREDICTED: threonine dehydratase biosynthetic, chloroplastic [Phoenix dactylifera]	GO:0044424//intracellular part;GO:0043226//organelle;GO:0043231//intracellular membrane-bounded organelle;GO:0005623//cell;GO:0005622//intracellular;GO:0009536//plastid;GO:0005737//cytoplasm;GO:0044464//cell part;GO:0043227//membrane-bounded organelle;GO:0043229//intracellular organelle;GO:0044444//cytoplasmic part	GO:0016829//lyase activity;GO:0043168//anion binding;GO:0016841//ammonia-lyase activity;GO:0016840//carbon-nitrogen lyase activity;GO:0043167//ion binding;GO:0003824//catalytic activity;GO:0005488//binding	GO:0006549//isoleucine metabolic process;GO:0044711//single-organism biosynthetic process;GO:0030163//protein catabolic process;GO:0044699//single-organism process;GO:0044710//single-organism metabolic process;GO:0044763//single-organism cellular process;GO:0044257//cellular protein catabolic process;GO:0044281//small molecule metabolic process;GO:0044238//primary metabolic process;GO:0006082//or…
novel-m0059-3p	Unigene0035473	DTC	417	4.5	2	0.018	6	6	PREDICTED: mitochondrial dicarboxylate/tricarboxylate transporter DTC [Pyrus x bretschneideri]	GO:0044425//membrane part;GO:0016020//membrane;GO:0031224//intrinsic component of membrane	-	-
novel-m0059-3p	Unigene0060954	SSRP1	688	4.5	2	0.018	3	3	FACT complex subunit SSRP1 [Ananas comosus]	GO:0005623//cell;GO:0044424//intracellular part;GO:0043231//intracellular membrane-bounded organelle;GO:0043227//membrane-bounded organelle;GO:0044464//cell part;GO:0005622//intracellular;GO:0043226//organelle;GO:0043229//intracellular organelle	GO:0003824//catalytic activity;GO:0016628//oxidoreductase activity, acting on the CH-CH group of donors, NAD or NADP as acceptor;GO:0016627//oxidoreductase activity, acting on the CH-CH group of donors;GO:0016491//oxidoreductase activity	GO:0008152//metabolic process;GO:0044710//single-organism metabolic process;GO:0044699//single-organism process
novel-m0059-3p	Unigene0058341	CYP65	164	4.5	2	0.018	2	2	PREDICTED: peptidyl-prolyl cis-trans isomerase CYP65-like [Nicotiana tabacum]	-	-	-
novel-m0059-3p	Unigene0111984	AUX22	676	4	2	0.018	2	2	PREDICTED: auxin-induced protein AUX22 [Nelumbo nucifera]	-	-	GO:0009987//cellular process;GO:0010467//gene expression;GO:0044260//cellular macromolecule metabolic process;GO:0009725//response to hormone;GO:0009059//macromolecule biosynthetic process;GO:0009719//response to endogenous stimulus;GO:0044249//cellular biosynthetic process;GO:1901576//organic substance biosynthetic process;GO:0043170//macromolecule metabolic process;GO:0034645//cellular macromol…
novel-m0059-3p	Unigene0083633	ICR3	852	3.5	2	0.018	4	4	PREDICTED: interactor of constitutive active ROPs 3 isoform X2 [Nelumbo nucifera]	-	-	-
novel-m0059-3p	Unigene0084400	-	116	4	2	0.018	6	3	--	-	-	-
novel-m0059-3p	Unigene0083959	RPL1	102	3	2	0.018	6	3	PREDICTED: 50S ribosomal protein L1, chloroplastic-like [Nelumbo nucifera]	GO:0005737//cytoplasm;GO:0044422//organelle part;GO:0030529//intracellular ribonucleoprotein complex;GO:0005622//intracellular;GO:0044391//ribosomal subunit;GO:0005623//cell;GO:0043228//non-membrane-bounded organelle;GO:0044464//cell part;GO:0043226//organelle;GO:0044424//intracellular part;GO:0044446//intracellular organelle part;GO:0043232//intracellular non-membrane-bounded organelle;GO:003299…	GO:0005198//structural molecule activity	GO:0010467//gene expression;GO:0008152//metabolic process;GO:0043170//macromolecule metabolic process;GO:0071704//organic substance metabolic process
novel-m0059-3p	Unigene0016682	TOGT1	591	3.5	2	0.018	8	4	PREDICTED: UDP-glucose flavonoid 3-O-glucosyltransferase 7-like [Fragaria vesca subsp. vesca] [Fragaria vesca]	-	GO:0016757//transferase activity, transferring glycosyl groups;GO:0016740//transferase activity;GO:0003824//catalytic activity	-
novel-m0059-3p	Unigene0006172	PHRF1	1890	4.5	2	0.018	5	5	PHD finger family protein [Populus trichocarpa]	-	-	-
novel-m0059-3p	Unigene0044633	-	59	4.5	2	0.018	2	2	--	-	-	-
novel-m0059-3p	Unigene0064326	maoII	628	4.5	2	0.018	4	4	Primary amine oxidase [Anthurium amnicola]	-	-	-
novel-m0059-3p	Unigene0069090	ACBP3	827	4	2	0.018	2	2	PREDICTED: acyl-CoA-binding domain-containing protein 3-like isoform X3 [Nelumbo nucifera]	-	-	-
novel-m0059-3p	Unigene0067372	B3GALT7	11	4.5	2	0.018	4	1.33333	PREDICTED: beta-1,3-galactosyltransferase 7 [Nelumbo nucifera]	GO:0016020//membrane;GO:0044425//membrane part;GO:0031224//intrinsic component of membrane	GO:0016740//transferase activity;GO:0003824//catalytic activity;GO:0016758//transferase activity, transferring hexosyl groups;GO:0016757//transferase activity, transferring glycosyl groups	GO:0044260//cellular macromolecule metabolic process;GO:0071704//organic substance metabolic process;GO:0019538//protein metabolic process;GO:0044237//cellular metabolic process;GO:0044238//primary metabolic process;GO:0008152//metabolic process;GO:0006464//cellular protein modification process;GO:0043170//macromolecule metabolic process;GO:0009987//cellular process;GO:0036211//protein modificati…
novel-m0059-3p	Unigene0112734	-	314	3.5	2	0.018	2	2	Endosulfine domain-containing protein [Cephalotus follicularis]	-	-	-
novel-m0059-3p	Unigene0055686	PI4KB2	957	4	2	0.018	2	1	PREDICTED: LOW QUALITY PROTEIN: phosphatidylinositol 4-kinase beta 1 [Phoenix dactylifera]	-	-	-
novel-m0059-3p	Unigene0082178	-	834	3.5	2	0.018	2	2	--	-	-	-
novel-m0059-3p	Unigene0062628	-	212	4	2	0.018	2	2	PREDICTED: ubinuclein-1-like isoform X1 [Nelumbo nucifera]	-	-	-
novel-m0059-3p	Unigene0051664	CRK42	447	4.5	2	0.018	10	10	PREDICTED: cysteine-rich receptor-like protein kinase 42 [Nelumbo nucifera]	GO:0016020//membrane	GO:0004672//protein kinase activity;GO:0003824//catalytic activity;GO:0016773//phosphotransferase activity, alcohol group as acceptor;GO:0016740//transferase activity;GO:0016301//kinase activity;GO:0016772//transferase activity, transferring phosphorus-containing groups	GO:0006793//phosphorus metabolic process;GO:0006796//phosphate-containing compound metabolic process;GO:0044237//cellular metabolic process;GO:0009987//cellular process;GO:0008152//metabolic process
novel-m0059-3p	Unigene0065472	-	1733	4.5	2	0.018	4	4	PREDICTED: peptidyl-prolyl cis-trans isomerase G [Cucumis sativus]	-	-	GO:0044702//single organism reproductive process;GO:0032502//developmental process;GO:0045491//xylan metabolic process;GO:0048856//anatomical structure development;GO:0048285//organelle fission;GO:0006807//nitrogen compound metabolic process;GO:0044710//single-organism metabolic process;GO:0060249//anatomical structure homeostasis;GO:1901360//organic cyclic compound metabolic process;GO:0000723//…
novel-m0059-3p	Unigene0000741	-	80	4	2	0.018	2	2	--	-	-	-
novel-m0059-3p	Unigene0055879	KEG	1132	4.5	2	0.018	2	2	PREDICTED: E3 ubiquitin-protein ligase KEG isoform X2 [Nelumbo nucifera]	GO:0044424//intracellular part;GO:0012505//endomembrane system;GO:0044444//cytoplasmic part;GO:0043231//intracellular membrane-bounded organelle;GO:0043227//membrane-bounded organelle;GO:0044422//organelle part;GO:0005622//intracellular;GO:0044464//cell part;GO:0005623//cell;GO:0031984//organelle subcompartment;GO:0005768//endosome;GO:0005737//cytoplasm;GO:0043229//intracellular organelle;GO:0044…	GO:0016301//kinase activity;GO:0016773//phosphotransferase activity, alcohol group as acceptor;GO:0043169//cation binding;GO:0003824//catalytic activity;GO:0001883//purine nucleoside binding;GO:0032549//ribonucleoside binding;GO:1901363//heterocyclic compound binding;GO:0004672//protein kinase activity;GO:0016740//transferase activity;GO:0016772//transferase activity, transferring phosphorus-cont…	GO:0009057//macromolecule catabolic process;GO:0006725//cellular aromatic compound metabolic process;GO:0051641//cellular localization;GO:0016071//mRNA metabolic process;GO:0043412//macromolecule modification;GO:0046903//secretion;GO:0006464//cellular protein modification process;GO:0044267//cellular protein metabolic process;GO:0006402//mRNA catabolic process;GO:0044270//cellular nitrogen compou…
novel-m0059-3p	Unigene0042366	-	438	3	2	0.018	3	3	PREDICTED: proline-rich receptor-like protein kinase PERK2 isoform X1 [Juglans regia]	-	-	-
novel-m0059-3p	Unigene0011134	-	264	4.5	2	0.018	4	4	PREDICTED: intracellular protein transport protein USO1-like [Prunus mume]	-	-	-
novel-m0059-3p	Unigene0076793	MFAP1	1603	3.5	2	0.018	6	6	PREDICTED: microfibrillar-associated protein 1-like [Prunus mume]	-	-	-
novel-m0059-3p	Unigene0019054	SRRM2	233	4.5	2	0.018	7	7	PREDICTED: sarcoplasmic reticulum histidine-rich calcium-binding protein-like [Nelumbo nucifera]	-	-	-
novel-m0059-3p	Unigene0042885	ICR1	1086	4.5	2	0.018	3	1.5	PREDICTED: interactor of constitutive active ROPs 4-like [Nelumbo nucifera]	-	-	-
novel-m0059-3p	Unigene0092242	CIPK5	1721	3	2	0.018	4	4	CBL-interacting protein kinase 5 [Ananas comosus]	GO:0005622//intracellular;GO:0005737//cytoplasm;GO:0044444//cytoplasmic part;GO:0005623//cell;GO:0044464//cell part;GO:0044424//intracellular part	GO:0016740//transferase activity;GO:0032550//purine ribonucleoside binding;GO:0001883//purine nucleoside binding;GO:0097367//carbohydrate derivative binding;GO:0004672//protein kinase activity;GO:0036094//small molecule binding;GO:0016773//phosphotransferase activity, alcohol group as acceptor;GO:0016772//transferase activity, transferring phosphorus-containing groups;GO:0001882//nucleoside bindi…	GO:0050789//regulation of biological process;GO:0036211//protein modification process;GO:0044237//cellular metabolic process;GO:0065007//biological regulation;GO:0050896//response to stimulus;GO:0019538//protein metabolic process;GO:0008152//metabolic process;GO:0050794//regulation of cellular process;GO:0044260//cellular macromolecule metabolic process;GO:0006464//cellular protein modification p…
novel-m0059-3p	Unigene0100035	HSL1	472	4.5	2	0.018	2	2	leucine-rich repeat receptor-like protein kinase [Populus trichocarpa]	-	-	-
novel-m0059-3p	Unigene0037266	PSY1	995	4.5	2	0.018	2	1	PREDICTED: coiled-coil domain-containing protein 12 isoform X1 [Nelumbo nucifera]	-	-	-
novel-m0059-3p	Unigene0061502	-	279	4	2	0.018	11	11	PREDICTED: homeobox-DDT domain protein RLT2-like isoform X1 [Nelumbo nucifera]	-	-	-
novel-m0059-3p	Unigene0070041	ROPGAP1	164	3.5	2	0.018	2	2	PREDICTED: rho GTPase-activating protein 5-like [Nelumbo nucifera]	-	-	GO:0065007//biological regulation;GO:0050789//regulation of biological process;GO:0050794//regulation of cellular process
novel-m0059-3p	Unigene0067295	At5g16730	690	4.5	2	0.018	2	2	PREDICTED: WEB family protein At3g02930, chloroplastic-like [Nelumbo nucifera]	-	-	-
novel-m0059-3p	Unigene0030372	-	2367	4	2	0.018	3	1.5	PREDICTED: histone H3.v1-like isoform X2 [Nelumbo nucifera]	-	-	-
novel-m0077-5p	Unigene0072815	STOP1	1237	4.5	2	0.004	3	1.5	PREDICTED: protein SENSITIVE TO PROTON RHIZOTOXICITY 1 [Eucalyptus grandis]	-	-	-
novel-m0077-5p	Unigene0072816	STOP1	897	4.5	2	0.004	3	1.5	PREDICTED: protein SENSITIVE TO PROTON RHIZOTOXICITY 1 [Eucalyptus grandis]	-	-	-
novel-m0082-5p	Unigene0036817	Os07g0103200	48	4.5	2	0.006	2	2	PREDICTED: DDRGK domain-containing protein 1 [Vitis vinifera]	-	-	-
novel-m0082-5p	Unigene0073266	CYP97A3	2199	4.5	2	0.006	4	4	PREDICTED: protein LUTEIN DEFICIENT 5, chloroplastic-like isoform X1 [Nelumbo nucifera]	GO:0043226//organelle;GO:0044464//cell part;GO:0044446//intracellular organelle part;GO:0009536//plastid;GO:0043229//intracellular organelle;GO:0031967//organelle envelope;GO:0031090//organelle membrane;GO:0005737//cytoplasm;GO:0044424//intracellular part;GO:0044422//organelle part;GO:0031975//envelope;GO:0005623//cell;GO:0044435//plastid part;GO:0043231//intracellular membrane-bounded organelle;…	GO:0016712//oxidoreductase activity, acting on paired donors, with incorporation or reduction of molecular oxygen, reduced flavin or flavoprotein as one donor, and incorporation of one atom of oxygen;GO:0097159//organic cyclic compound binding;GO:0046914//transition metal ion binding;GO:0004497//monooxygenase activity;GO:0016705//oxidoreductase activity, acting on paired donors, with incorporatio…	GO:0018130//heterocycle biosynthetic process;GO:0043170//macromolecule metabolic process;GO:0016114//terpenoid biosynthetic process;GO:0009893//positive regulation of metabolic process;GO:0006779//porphyrin-containing compound biosynthetic process;GO:0050789//regulation of biological process;GO:0044710//single-organism metabolic process;GO:0046148//pigment biosynthetic process;GO:0008299//isopren…
novel-m0082-5p	Unigene0038614	MBD9	2816	4	2	0.006	2	2	PREDICTED: methyl-CpG-binding domain-containing protein 9 [Nelumbo nucifera]	-	-	GO:0044238//primary metabolic process;GO:0048731//system development;GO:0043170//macromolecule metabolic process;GO:0009987//cellular process;GO:0071840//cellular component organization or biogenesis;GO:0008152//metabolic process;GO:0044767//single-organism developmental process;GO:0044707//single-multicellular organism process;GO:0048856//anatomical structure development;GO:0016043//cellular com…
novel-m0082-5p	Unigene0002477	FPP4	3010	4	2	0.006	3	3	PREDICTED: filament-like plant protein 4 [Nelumbo nucifera]	-	-	-
novel-m0082-5p	Unigene0081425	INO80	1066	4.5	2	0.006	2	2	PREDICTED: DNA helicase INO80 isoform X2 [Nelumbo nucifera]	-	-	-
novel-m0082-5p	Unigene0030924	At5g65490	844	4.5	2	0.006	3	3	PREDICTED: protein ecdysoneless homolog [Nelumbo nucifera]	-	-	-
novel-m0082-5p	Unigene0054076	GL2	329	4	2	0.006	2	2	PREDICTED: homeobox-leucine zipper protein GLABRA 2-like [Nelumbo nucifera]	GO:0043227//membrane-bounded organelle;GO:0005622//intracellular;GO:0005623//cell;GO:0044424//intracellular part;GO:0044464//cell part;GO:0043226//organelle;GO:0043231//intracellular membrane-bounded organelle;GO:0043229//intracellular organelle	GO:0003677//DNA binding;GO:0097159//organic cyclic compound binding;GO:0003676//nucleic acid binding;GO:1901363//heterocyclic compound binding;GO:0005488//binding	GO:0065007//biological regulation;GO:0010468//regulation of gene expression;GO:0019222//regulation of metabolic process;GO:0060255//regulation of macromolecule metabolic process;GO:0050789//regulation of biological process
novel-m0082-5p	Unigene0042103	-	282	4.5	2	0.006	3	1	PREDICTED: uncharacterized protein LOC104606154 isoform X3 [Nelumbo nucifera]	-	-	-
novel-m0082-5p	Unigene0004592	GIP	4108	4.5	2	0.006	3	3	Retrovirus-related Pol polyprotein from transposon TNT 1-94 [Cajanus cajan]	-	-	-
novel-m0082-5p	Unigene0104874	PSBS	766	4.5	2	0.006	4	4	PREDICTED: photosystem II 22 kDa protein, chloroplastic [Phoenix dactylifera]	-	-	-
novel-m0082-5p	Unigene0038448	UNE12	723	4.5	2	0.006	2	1	PREDICTED: transcription factor UNE12 isoform X3 [Nelumbo nucifera]	-	-	-
novel-m0082-5p	Unigene0073905	Iws1	402	4	2	0.006	3	3	PREDICTED: protein IWS1 homolog 2-like [Nelumbo nucifera]	-	-	-
novel-m0082-5p	Unigene0051557	-	7042	4.5	2	0.006	2	2	Protein virilizer, partial [Corchorus capsularis]	-	-	-
novel-m0082-5p	Unigene0038447	UNE12	956	4.5	2	0.006	2	1	Os07g0182200 [Oryza sativa Japonica Group]	-	-	-
novel-m0082-5p	Unigene0004750	GIP	960	4.5	2	0.006	2	2	Retrovirus-related Pol polyprotein from transposon TNT 1-94, partial [Cajanus cajan]	-	-	-
novel-m0082-5p	Unigene0097617	-	31	4.5	2	0.006	2	2	PREDICTED: uncharacterized protein LOC107403258 [Ziziphus jujuba]	-	-	-
novel-m0082-5p	Unigene0063466	RFC3	31	3.5	2	0.006	3	3	PREDICTED: replication factor C subunit 3 [Nelumbo nucifera]	-	GO:0036094//small molecule binding;GO:0032550//purine ribonucleoside binding;GO:0001883//purine nucleoside binding;GO:0034061//DNA polymerase activity;GO:0001882//nucleoside binding;GO:0016772//transferase activity, transferring phosphorus-containing groups;GO:0005488//binding;GO:0097159//organic cyclic compound binding;GO:0016740//transferase activity;GO:0003824//catalytic activity;GO:0097367//c…	GO:0006259//DNA metabolic process;GO:0009987//cellular process;GO:0006139//nucleobase-containing compound metabolic process;GO:0006807//nitrogen compound metabolic process;GO:1901360//organic cyclic compound metabolic process;GO:0071704//organic substance metabolic process;GO:0043170//macromolecule metabolic process;GO:0034641//cellular nitrogen compound metabolic process;GO:0006725//cellular aro…
novel-m0082-5p	Unigene0065962	CYP63	970	3.5	2	0.006	15	15	PREDICTED: peptidyl-prolyl cis-trans isomerase CYP95 isoform X2 [Nelumbo nucifera]	-	-	GO:0071704//organic substance metabolic process;GO:0044238//primary metabolic process;GO:0008152//metabolic process;GO:0043170//macromolecule metabolic process;GO:0044260//cellular macromolecule metabolic process;GO:0009987//cellular process;GO:0044237//cellular metabolic process
novel-m0082-5p	Unigene0056280	SFH1	849	4.5	2	0.006	18	18	PREDICTED: phosphatidylinositol/phosphatidylcholine transfer protein SFH1-like [Nelumbo nucifera]	-	-	-
novel-m0082-5p	Unigene0071026	HXK1	288	4.5	2	0.006	4	4	hexokinase [Citrus sinensis]	-	GO:0036094//small molecule binding;GO:0097367//carbohydrate derivative binding;GO:0001882//nucleoside binding;GO:0003824//catalytic activity;GO:0016773//phosphotransferase activity, alcohol group as acceptor;GO:1901363//heterocyclic compound binding;GO:0016772//transferase activity, transferring phosphorus-containing groups;GO:0001883//purine nucleoside binding;GO:0016740//transferase activity;GO…	GO:0019752//carboxylic acid metabolic process;GO:0044763//single-organism cellular process;GO:0043436//oxoacid metabolic process;GO:0006090//pyruvate metabolic process;GO:0006793//phosphorus metabolic process;GO:0008152//metabolic process;GO:0071704//organic substance metabolic process;GO:0044238//primary metabolic process;GO:0044281//small molecule metabolic process;GO:0044237//cellular metaboli…
novel-m0082-5p	Unigene0071518	CKB1	1516	4.5	2	0.006	4	4	PREDICTED: casein kinase II subunit beta isoform X1 [Amborella trichopoda]	GO:0032991//macromolecular complex;GO:0043234//protein complex	GO:0003824//catalytic activity;GO:0019207//kinase regulator activity;GO:0016740//transferase activity;GO:0098772//molecular function regulator;GO:0005488//binding;GO:0030234//enzyme regulator activity;GO:0016772//transferase activity, transferring phosphorus-containing groups	GO:0042325//regulation of phosphorylation;GO:0060255//regulation of macromolecule metabolic process;GO:0043549//regulation of kinase activity;GO:0080090//regulation of primary metabolic process;GO:0050789//regulation of biological process;GO:0045859//regulation of protein kinase activity;GO:0019220//regulation of phosphate metabolic process;GO:0032268//regulation of cellular protein metabolic pro…
novel-m0082-5p	Unigene0049687	CHY1	1789	4.5	2	0.006	2	2	PREDICTED: 3-hydroxyisobutyryl-CoA hydrolase 1 [Prunus mume]	-	-	-
novel-m0082-5p	Unigene0053629	SARED1	3450	4.5	2	0.006	6	6	Sanguinarine reductase, partial [Ananas comosus]	-	-	-
novel-m0082-5p	Unigene0059611	PF13_0198	1692	3.5	2	0.006	5	2.5	Cingulin [Anthurium amnicola]	-	-	-
novel-m0082-5p	Unigene0060319	-	478	4	2	0.006	8	8	Protein split ends [Anthurium amnicola]	-	-	-
novel-m0082-5p	Unigene0013498	At1g51650	35	4	2	0.006	9	9	ATP synthase epsilon chain [Arabidopsis thaliana]	GO:0005623//cell;GO:0031090//organelle membrane;GO:0043229//intracellular organelle;GO:0005622//intracellular;GO:0043227//membrane-bounded organelle;GO:0005737//cytoplasm;GO:0044424//intracellular part;GO:0043226//organelle;GO:0044429//mitochondrial part;GO:0005740//mitochondrial envelope;GO:0005739//mitochondrion;GO:0031967//organelle envelope;GO:0016020//membrane;GO:0044422//organelle part;GO:0…	GO:0005215//transporter activity;GO:0042625//ATPase coupled ion transmembrane transporter activity;GO:0022804//active transmembrane transporter activity;GO:0015405//P-P-bond-hydrolysis-driven transmembrane transporter activity;GO:0016820//hydrolase activity, acting on acid anhydrides, catalyzing transmembrane movement of substances;GO:0042623//ATPase activity, coupled;GO:0042626//ATPase activity,…	GO:0034641//cellular nitrogen compound metabolic process;GO:0071704//organic substance metabolic process;GO:0046034//ATP metabolic process;GO:0006818//hydrogen transport;GO:1901564//organonitrogen compound metabolic process;GO:0006810//transport;GO:1901659//glycosyl compound biosynthetic process;GO:0046390//ribose phosphate biosynthetic process;GO:1901293//nucleoside phosphate biosynthetic proces…
novel-m0082-5p	Unigene0045732	-	24	4.5	2	0.006	2	2	--	-	-	-
novel-m0082-5p	Unigene0073608	pqqL	797	4	2	0.006	2	2	PREDICTED: zinc protease PQQL-like isoform X1 [Nelumbo nucifera]	-	-	-
novel-m0082-5p	Unigene0006385	-	985	3	2	0.006	17	17	BnaA05g03840D [Brassica napus]	-	-	-
novel-m0082-5p	Unigene0016118	FAO1	2013	3.5	2	0.006	5	5	PREDICTED: long-chain-alcohol oxidase FAO2 [Elaeis guineensis]	-	-	-
novel-m0082-5p	Unigene0070964	At4g22990	264	4.5	2	0.006	2	2	PREDICTED: SPX domain-containing membrane protein At4g22990 [Vitis vinifera]	-	-	GO:0009987//cellular process;GO:0044763//single-organism cellular process;GO:0044699//single-organism process
novel-m0082-5p	Unigene0076262	guaB	735	4.5	2	0.006	8	8	Inosine-5'-monophosphate dehydrogenase [Anthurium amnicola]	-	-	-
novel-m0082-5p	Unigene0039047	At5g06830	1296	3.5	2	0.006	2	1	PREDICTED: CDK5RAP3-like protein [Phoenix dactylifera]	-	-	-
novel-m0082-5p	Unigene0010803	At4g09670	313	4.5	2	0.006	2	2	PREDICTED: uncharacterized oxidoreductase At4g09670-like [Nicotiana attenuata]	-	-	-
novel-m0082-5p	Unigene0040150	At4g10320	2044	3.5	2	0.006	2	2	PREDICTED: isoleucine--tRNA ligase, cytoplasmic-like isoform X1 [Phoenix dactylifera]	-	-	-
novel-m0082-5p	Unigene0054428	At1g76660	1602	4	2	0.006	2	2	PREDICTED: uncharacterized protein At1g76660 [Nelumbo nucifera]	-	-	-
novel-m0082-5p	Unigene0033936	TT12	647	4	2	0.006	3	1.5	PREDICTED: protein DETOXIFICATION 35 [Nelumbo nucifera]	GO:0044425//membrane part;GO:0016020//membrane;GO:0031224//intrinsic component of membrane	GO:0005215//transporter activity;GO:0015291//secondary active transmembrane transporter activity;GO:0022804//active transmembrane transporter activity;GO:0022857//transmembrane transporter activity	GO:0009653//anatomical structure morphogenesis;GO:0030154//cell differentiation;GO:0000902//cell morphogenesis;GO:0048869//cellular developmental process;GO:0048468//cell development;GO:0006928//movement of cell or subcellular component;GO:0016043//cellular component organization;GO:0044767//single-organism developmental process;GO:0000904//cell morphogenesis involved in differentiation;GO:000998…
novel-m0082-5p	Unigene0028121	-	1373	3.5	2	0.006	6	6	PREDICTED: uncharacterized protein LOC100854825 [Vitis vinifera]	-	-	-
novel-m0082-5p	Unigene0034130	CURT1A	23	4	2	0.006	2	2	PREDICTED: protein CURVATURE THYLAKOID 1A, chloroplastic-like [Populus euphratica]	-	-	-
novel-m0082-5p	Unigene0059612	PPI1	2633	3.5	2	0.006	5	2.5	PREDICTED: microtubule-associated protein futsch isoform X2 [Vitis vinifera]	-	-	-
novel-m0082-5p	Unigene0042105	-	282	4.5	2	0.006	3	1	PREDICTED: uncharacterized protein LOC104606154 isoform X1 [Nelumbo nucifera]	-	-	-
novel-m0082-5p	Unigene0042104	-	282	4.5	2	0.006	3	1	PREDICTED: uncharacterized protein LOC104606154 isoform X2 [Nelumbo nucifera]	-	-	-
novel-m0082-5p	Unigene0011443	RPL21A	30	4.5	2	0.006	35	35	PREDICTED: 60S ribosomal protein L21-2-like [Nelumbo nucifera]	GO:0005622//intracellular;GO:0030529//intracellular ribonucleoprotein complex;GO:0044424//intracellular part;GO:0032991//macromolecular complex;GO:0005623//cell;GO:0044464//cell part;GO:1990904//ribonucleoprotein complex	-	GO:0043170//macromolecule metabolic process;GO:0071704//organic substance metabolic process;GO:0010467//gene expression;GO:0008152//metabolic process
novel-m0082-5p	Unigene0102575	AS1	1548	4.5	2	0.006	5	5	polyphenol oxidase [Morus alba var. multicaulis] [Morus alba]	-	-	GO:0044710//single-organism metabolic process;GO:0008152//metabolic process;GO:0044699//single-organism process
novel-m0082-5p	Unigene0108505	PRXIIF	52	4	2	0.006	9	9	PREDICTED: peroxiredoxin-2F, mitochondrial [Ziziphus jujuba]	GO:0044446//intracellular organelle part;GO:0043231//intracellular membrane-bounded organelle;GO:0005739//mitochondrion;GO:0005623//cell;GO:0044424//intracellular part;GO:0044444//cytoplasmic part;GO:0044429//mitochondrial part;GO:0044422//organelle part;GO:0005737//cytoplasm;GO:0005622//intracellular;GO:0043227//membrane-bounded organelle;GO:0044464//cell part;GO:0043226//organelle;GO:0043229//i…	GO:0016209//antioxidant activity;GO:0003824//catalytic activity	GO:0006082//organic acid metabolic process;GO:0050896//response to stimulus;GO:0032787//monocarboxylic acid metabolic process;GO:0015980//energy derivation by oxidation of organic compounds;GO:0006950//response to stress;GO:0044710//single-organism metabolic process;GO:0043436//oxoacid metabolic process;GO:0044237//cellular metabolic process;GO:0044281//small molecule metabolic process;GO:0009987…
novel-m0082-5p	Unigene0061005	MRE11	1805	4	2	0.006	5	5	PREDICTED: double-strand break repair protein MRE11-like [Elaeis guineensis]	GO:0043227//membrane-bounded organelle;GO:0043231//intracellular membrane-bounded organelle;GO:0005623//cell;GO:0043229//intracellular organelle;GO:0044464//cell part;GO:0005622//intracellular;GO:0043226//organelle;GO:0044424//intracellular part	GO:0046872//metal ion binding;GO:0043169//cation binding;GO:0004518//nuclease activity;GO:0043167//ion binding;GO:0046914//transition metal ion binding;GO:0005488//binding;GO:0016787//hydrolase activity;GO:0003824//catalytic activity;GO:0016788//hydrolase activity, acting on ester bonds	GO:0006950//response to stress;GO:0044238//primary metabolic process;GO:0090304//nucleic acid metabolic process;GO:0033554//cellular response to stress;GO:0044699//single-organism process;GO:0044260//cellular macromolecule metabolic process;GO:0007049//cell cycle;GO:0071704//organic substance metabolic process;GO:0051716//cellular response to stimulus;GO:0008152//metabolic process;GO:0006281//DNA…
novel-m0082-5p	Unigene0026113	-	401	4	2	0.006	4	4	Bifunctional methyltransferase, partial [Anthurium amnicola]	GO:0044434//chloroplast part;GO:0043229//intracellular organelle;GO:0044444//cytoplasmic part;GO:0005622//intracellular;GO:0009536//plastid;GO:0031967//organelle envelope;GO:0005623//cell;GO:0044424//intracellular part;GO:0009507//chloroplast;GO:0043231//intracellular membrane-bounded organelle;GO:0031975//envelope;GO:0043226//organelle;GO:0044446//intracellular organelle part;GO:0044435//plastid…	-	-
novel-m0082-5p	Unigene0039048	At5g06830	1279	3.5	2	0.006	2	1	PREDICTED: CDK5RAP3-like protein [Nelumbo nucifera]	-	-	-
novel-m0082-5p	Unigene0092043	HSP18.2	469	4	2	0.006	2	2	cytosolic class I small heat shock protein [Chimonanthus praecox]	-	-	-
novel-m0082-5p	Unigene0063515	IAA27	1487	4.5	2	0.006	4	4	PREDICTED: auxin-responsive protein IAA27 [Vitis vinifera]	-	-	-
novel-m0082-5p	Unigene0033935	TT12	335	4	2	0.006	3	1.5	PREDICTED: protein DETOXIFICATION 35 [Nelumbo nucifera]	GO:0044425//membrane part;GO:0031224//intrinsic component of membrane;GO:0016020//membrane	GO:0015291//secondary active transmembrane transporter activity;GO:0022857//transmembrane transporter activity;GO:0005215//transporter activity;GO:0022804//active transmembrane transporter activity	GO:0006928//movement of cell or subcellular component;GO:0000902//cell morphogenesis;GO:0048468//cell development;GO:0032502//developmental process;GO:0044699//single-organism process;GO:0071840//cellular component organization or biogenesis;GO:0048869//cellular developmental process;GO:0009987//cellular process;GO:0030154//cell differentiation;GO:0000904//cell morphogenesis involved in different…
novel-m0082-5p	Unigene0028121	-	1370	4	2	0.006	3	3	PREDICTED: uncharacterized protein LOC100854825 [Vitis vinifera]	-	-	-
novel-m0095-5p	Unigene0043147	RNU1	1502	4	2	0.004	5	2.5	PREDICTED: U1 small nuclear ribonucleoprotein 70 kDa-like [Nelumbo nucifera]	-	-	-
novel-m0095-5p	Unigene0031902	FIPS5	3055	4.5	2	0.004	3	1.5	PREDICTED: FIP1[III]-like protein [Nelumbo nucifera]	-	-	-
novel-m0095-5p	Unigene0064770	PDCD4	1289	4	2	0.004	2	2	PREDICTED: programmed cell death protein 4-like [Malus domestica]	-	GO:0003824//catalytic activity	GO:0044237//cellular metabolic process;GO:0008152//metabolic process;GO:0071704//organic substance metabolic process;GO:0044260//cellular macromolecule metabolic process;GO:0043170//macromolecule metabolic process;GO:0009987//cellular process
novel-m0095-5p	Unigene0028800	CPK13	1326	0	2	0.004	3	3	PREDICTED: calcium-dependent protein kinase 13 [Nelumbo nucifera]	GO:0016020//membrane	GO:0016773//phosphotransferase activity, alcohol group as acceptor;GO:0004672//protein kinase activity;GO:0036094//small molecule binding;GO:0001882//nucleoside binding;GO:0043169//cation binding;GO:0016301//kinase activity;GO:0016740//transferase activity;GO:0004674//protein serine/threonine kinase activity;GO:0032550//purine ribonucleoside binding;GO:0097367//carbohydrate derivative binding;GO:…	GO:0044267//cellular protein metabolic process;GO:0036211//protein modification process;GO:0006796//phosphate-containing compound metabolic process;GO:0019538//protein metabolic process;GO:0009987//cellular process;GO:0044260//cellular macromolecule metabolic process;GO:0044238//primary metabolic process;GO:0006468//protein phosphorylation;GO:0071704//organic substance metabolic process;GO:000646…
novel-m0095-5p	Unigene0056552	SRP72	551	4.5	2	0.004	6	6	PREDICTED: signal recognition particle subunit SRP72 [Phoenix dactylifera]	GO:0044444//cytoplasmic part;GO:0030529//intracellular ribonucleoprotein complex;GO:0044424//intracellular part;GO:0005622//intracellular;GO:0005623//cell;GO:0005737//cytoplasm;GO:0044464//cell part;GO:0048500//signal recognition particle;GO:0032991//macromolecular complex;GO:1990904//ribonucleoprotein complex	GO:0005488//binding;GO:0003676//nucleic acid binding;GO:0097159//organic cyclic compound binding;GO:1901363//heterocyclic compound binding;GO:0003723//RNA binding	GO:0006810//transport;GO:0044763//single-organism cellular process;GO:0044802//single-organism membrane organization;GO:0071702//organic substance transport;GO:0045184//establishment of protein localization;GO:0015031//protein transport;GO:0006613//cotranslational protein targeting to membrane;GO:0006612//protein targeting to membrane;GO:1902578//single-organism localization;GO:0006605//protein t…
novel-m0095-5p	Unigene0050600	tas	943	4.5	2	0.004	2	2	Protein tas, partial [Anthurium amnicola]	-	-	-
novel-m0095-5p	Unigene0078875	-	291	4.5	2	0.004	7	7	PREDICTED: E3 ubiquitin-protein ligase MARCH8-like isoform X1 [Populus euphratica]	-	-	-
novel-m0095-5p	Unigene0067105	EIF5	509	4.5	2	0.004	11	11	Eukaryotic translation initiation factor 5 [Anthurium amnicola]	-	-	-
novel-m0095-5p	Unigene0051963	-	315	4.5	2	0.004	3	1.5	PREDICTED: uncharacterized protein LOC100258835 isoform X1 [Vitis vinifera]	-	-	-
novel-m0095-5p	Unigene0100317	MYB44	898	4.5	2	0.004	2	2	PREDICTED: transcription factor MYB44-like [Populus euphratica]	-	-	-
novel-m0095-5p	Unigene0063843	FHY	270	4	2	0.004	2	2	PREDICTED: bifunctional riboflavin kinase/FMN phosphatase [Elaeis guineensis]	-	GO:0016740//transferase activity;GO:0003824//catalytic activity;GO:0016301//kinase activity;GO:0016787//hydrolase activity;GO:0016772//transferase activity, transferring phosphorus-containing groups;GO:0016788//hydrolase activity, acting on ester bonds;GO:0042578//phosphoric ester hydrolase activity;GO:0016791//phosphatase activity	GO:0008152//metabolic process;GO:0006807//nitrogen compound metabolic process;GO:0044699//single-organism process;GO:0046483//heterocycle metabolic process;GO:0042726//flavin-containing compound metabolic process;GO:0006793//phosphorus metabolic process;GO:0044710//single-organism metabolic process;GO:0034641//cellular nitrogen compound metabolic process;GO:0006767//water-soluble vitamin metaboli…
novel-m0095-5p	Unigene0051964	-	315	4.5	2	0.004	3	1.5	PREDICTED: uncharacterized protein LOC105045577 isoform X3 [Elaeis guineensis]	-	-	-
novel-m0095-5p	Unigene0013846	PRKRIP1	346	4.5	2	0.004	3	3	PREDICTED: PRKR-interacting protein 1 [Ipomoea nil]	-	-	-
novel-m0095-5p	Unigene0043660	RPL12	575	4.5	2	0.004	9	9	PREDICTED: 50S ribosomal protein L12, chloroplastic-like [Nelumbo nucifera]	GO:0005623//cell;GO:0005622//intracellular;GO:0044464//cell part	-	-
novel-m0095-5p	Unigene0036270	ASIL2	314	4.5	2	0.004	3	1.5	PREDICTED: trihelix transcription factor ASIL2 [Nelumbo nucifera]	-	-	-
novel-m0095-5p	Unigene0031900	FIPS5	3055	4.5	2	0.004	3	1.5	PREDICTED: FIP1[III]-like protein [Nelumbo nucifera]	-	-	-
novel-m0095-5p	Unigene0025604	GAOA	165	4.5	2	0.004	4	4	PREDICTED: aldehyde oxidase GLOX [Nelumbo nucifera]	-	-	-
novel-m0095-5p	Unigene0001026	RNU1	1305	4	2	0.004	5	2.5	PREDICTED: U1 small nuclear ribonucleoprotein 70 kDa-like [Nelumbo nucifera]	-	-	-
novel-m0095-5p	Unigene0070592	MLH1	244	4	2	0.004	3	3	MLH1, partial [Chimonanthus praecox]	-	-	-
novel-m0095-5p	Unigene0087169	-	875	4.5	2	0.004	2	2	PREDICTED: LOW QUALITY PROTEIN: disease resistance RPP13-like protein 4 [Elaeis guineensis]	-	-	-
novel-m0095-5p	Unigene0036269	ASIL2	314	4.5	2	0.004	3	1.5	PREDICTED: trihelix transcription factor ASIL2 [Nelumbo nucifera]	-	-	-
novel-m0095-5p	Unigene0031524	fabZ	532	4.5	2	0.004	2	2	(3R)-hydroxymyristoyl-[acyl-carrier-protein] dehydratase [Anthurium amnicola]	-	-	-
novel-m0095-5p	Unigene0075434	ASPG1	503	4.5	2	0.004	2	2	PREDICTED: aspartyl protease family protein At5g10770-like [Elaeis guineensis]	-	-	-
novel-m0095-5p	Unigene0008734	At1g60770	484	4.5	2	0.004	2	2	PREDICTED: pentatricopeptide repeat-containing protein At1g60770 [Nelumbo nucifera]	-	-	-
novel-m0095-5p	Unigene0019495	RANBP1C	759	4.5	2	0.004	3	3	PREDICTED: ran-binding protein 1 homolog c [Eucalyptus grandis]	-	-	-
novel-m0095-5p	Unigene0056157	TIC100	451	3.5	2	0.004	5	2.5	PREDICTED: protein TIC 100-like [Malus domestica]	GO:0043229//intracellular organelle;GO:0043231//intracellular membrane-bounded organelle;GO:0044444//cytoplasmic part;GO:0016020//membrane;GO:0044435//plastid part;GO:0005737//cytoplasm;GO:0043226//organelle;GO:0019866//organelle inner membrane;GO:0009507//chloroplast;GO:0031090//organelle membrane;GO:0009526//plastid envelope;GO:0005622//intracellular;GO:0043227//membrane-bounded organelle;GO:00…	GO:0022892//substrate-specific transporter activity;GO:0005215//transporter activity	GO:1902582//single-organism intracellular transport;GO:0032502//developmental process;GO:0008104//protein localization;GO:0006886//intracellular protein transport;GO:0009987//cellular process;GO:0045184//establishment of protein localization;GO:0071702//organic substance transport;GO:0006996//organelle organization;GO:0071840//cellular component organization or biogenesis;GO:0061024//membrane org…
novel-m0095-5p	Unigene0049170	CP12-3	277	4	2	0.004	5	5	PREDICTED: calvin cycle protein CP12-3, chloroplastic [Nelumbo nucifera]	GO:0044424//intracellular part;GO:0043231//intracellular membrane-bounded organelle;GO:0005623//cell;GO:0043227//membrane-bounded organelle;GO:0032991//macromolecular complex;GO:0005737//cytoplasm;GO:0043226//organelle;GO:0009536//plastid;GO:0005622//intracellular;GO:0044444//cytoplasmic part;GO:0044464//cell part;GO:0043229//intracellular organelle	GO:0043167//ion binding;GO:0046914//transition metal ion binding;GO:0046872//metal ion binding;GO:0043169//cation binding;GO:0005488//binding	GO:0009892//negative regulation of metabolic process;GO:0071704//organic substance metabolic process;GO:0065007//biological regulation;GO:0048519//negative regulation of biological process;GO:0044699//single-organism process;GO:0009890//negative regulation of biosynthetic process;GO:0008152//metabolic process;GO:0044710//single-organism metabolic process;GO:0019222//regulation of metabolic proces…
novel-m0095-5p	Unigene0068834	-	1288	4	2	0.004	2	2	PREDICTED: uncharacterized protein LOC104597057 isoform X2 [Nelumbo nucifera]	-	-	-
novel-m0095-5p	Unigene0074215	At3g49900	1006	4	2	0.004	3	3	PREDICTED: BTB/POZ domain-containing protein At3g49900 [Nelumbo nucifera]	-	-	-
novel-m0095-5p	Unigene0056158	TIC100	1436	3.5	2	0.004	5	2.5	PREDICTED: protein TIC 100 [Nelumbo nucifera]	GO:0044422//organelle part;GO:0044446//intracellular organelle part;GO:0044435//plastid part;GO:0005737//cytoplasm;GO:0005622//intracellular;GO:0005623//cell;GO:0043226//organelle;GO:0031090//organelle membrane;GO:0019866//organelle inner membrane;GO:0031967//organelle envelope;GO:0043231//intracellular membrane-bounded organelle;GO:0043229//intracellular organelle;GO:0043227//membrane-bounded or…	GO:0022892//substrate-specific transporter activity;GO:0005215//transporter activity	GO:0016043//cellular component organization;GO:0006886//intracellular protein transport;GO:0046907//intracellular transport;GO:0071840//cellular component organization or biogenesis;GO:0006810//transport;GO:0033036//macromolecule localization;GO:0044802//single-organism membrane organization;GO:0051234//establishment of localization;GO:0044765//single-organism transport;GO:0061024//membrane organ…
novel-m0103-5p	Unigene0086236	-	449	4.5	2	0.002	4	4	OSJNBa0060N03.9 [Oryza sativa Japonica Group]	-	-	-
novel-m0103-5p	Unigene0080799	-	51	4.5	2	0.002	2	2	PREDICTED: uncharacterized protein LOC104434999 isoform X3 [Eucalyptus grandis]	-	-	-
novel-m0103-5p	Unigene0104137	LECRK71	1448	4	2	0.002	2	2	PREDICTED: probable L-type lectin-domain containing receptor kinase VII.2 [Juglans regia]	-	GO:0004672//protein kinase activity;GO:0005488//binding;GO:0016740//transferase activity;GO:0016301//kinase activity;GO:0016773//phosphotransferase activity, alcohol group as acceptor;GO:0003824//catalytic activity;GO:0004713//protein tyrosine kinase activity;GO:0016772//transferase activity, transferring phosphorus-containing groups	GO:0036211//protein modification process;GO:0006464//cellular protein modification process;GO:0044237//cellular metabolic process;GO:0008152//metabolic process;GO:0016310//phosphorylation;GO:0043170//macromolecule metabolic process;GO:0006796//phosphate-containing compound metabolic process;GO:0006468//protein phosphorylation;GO:0019538//protein metabolic process;GO:0006793//phosphorus metabolic …
novel-m0103-5p	Unigene0047914	-	1392	4.5	2	0.002	5	5	Methionyl-tRNA formyltransferase [Anthurium amnicola]	-	-	-
novel-m0103-5p	Unigene0024681	-	348	4.5	2	0.002	2	2	unnamed protein product [Coffea canephora]	-	-	-
novel-m0103-5p	Unigene0025352	At1g05910	391	4.5	2	0.002	3	3	PREDICTED: ATPase family AAA domain-containing protein At1g05910 [Vitis vinifera]	-	GO:0003824//catalytic activity;GO:0016787//hydrolase activity	-
novel-m0103-5p	Unigene0065654	-	5038	4.5	2	0.002	4	4	PREDICTED: uncharacterized protein LOC103701385 isoform X1 [Phoenix dactylifera]	-	-	-
novel-m0128-3p	Unigene0005820	-	44	4.5	2	0.012	3	3	Armadillo-like helical [Corchorus olitorius]	-	-	-
novel-m0128-3p	Unigene0082761	AUL1	2766	4.5	2	0.012	2	2	PREDICTED: auxilin-like protein 1 [Nelumbo nucifera]	-	-	-
novel-m0128-3p	Unigene0063312	CHUP1	1909	4.5	2	0.012	2	2	PREDICTED: protein CHUP1, chloroplastic-like isoform X2 [Nelumbo nucifera]	-	-	-
novel-m0128-3p	Unigene0038781	SF3B2	757	4.5	2	0.012	23	11.5	PREDICTED: splicing factor 3B subunit 2-like [Nelumbo nucifera]	-	-	-
novel-m0128-3p	Unigene0077936	SEU	715	4.5	2	0.012	3	3	PREDICTED: transcriptional corepressor SEUSS-like [Nelumbo nucifera]	-	-	-
novel-m0128-3p	Unigene0062573	RABH1B	1020	4.5	2	0.012	2	2	PREDICTED: ras-related protein RABH1b [Amborella trichopoda]	GO:0031090//organelle membrane;GO:0044444//cytoplasmic part;GO:0044422//organelle part;GO:0031984//organelle subcompartment;GO:0043231//intracellular membrane-bounded organelle;GO:0044446//intracellular organelle part;GO:0005911//cell-cell junction;GO:0005622//intracellular;GO:0016020//membrane;GO:0005623//cell;GO:0044464//cell part;GO:0043226//organelle;GO:0005737//cytoplasm;GO:0044424//intracel…	GO:0032550//purine ribonucleoside binding;GO:0001883//purine nucleoside binding;GO:0097159//organic cyclic compound binding;GO:0032549//ribonucleoside binding;GO:0001882//nucleoside binding;GO:1901363//heterocyclic compound binding;GO:0005488//binding;GO:0097367//carbohydrate derivative binding;GO:0036094//small molecule binding;GO:0003824//catalytic activity	GO:0065007//biological regulation;GO:0008104//protein localization;GO:0051179//localization;GO:0033036//macromolecule localization;GO:0048193//Golgi vesicle transport;GO:0007165//signal transduction;GO:0046907//intracellular transport;GO:0009987//cellular process;GO:0044699//single-organism process;GO:0050789//regulation of biological process;GO:1902578//single-organism localization;GO:0044700//s…
novel-m0128-3p	Unigene0042850	WCRKC2	715	4.5	2	0.012	4	2	PREDICTED: thioredoxin-like 3-2, chloroplastic isoform X1 [Gossypium arboreum]	GO:0005623//cell;GO:0005737//cytoplasm;GO:0044424//intracellular part;GO:0043226//organelle;GO:0043229//intracellular organelle;GO:0044464//cell part;GO:0043231//intracellular membrane-bounded organelle;GO:0044444//cytoplasmic part;GO:0005622//intracellular;GO:0009536//plastid;GO:0043227//membrane-bounded organelle	-	GO:0044699//single-organism process
novel-m0128-3p	Unigene0038182	HMGB7	423	4	2	0.012	3	3	High mobility group B protein 7 [Anthurium amnicola]	GO:0005622//intracellular;GO:0043226//organelle;GO:0043229//intracellular organelle;GO:0043231//intracellular membrane-bounded organelle;GO:0005623//cell;GO:0044464//cell part;GO:0044424//intracellular part;GO:0043227//membrane-bounded organelle	GO:0001071//nucleic acid binding transcription factor activity	GO:0006139//nucleobase-containing compound metabolic process;GO:0065007//biological regulation;GO:0043170//macromolecule metabolic process;GO:0044237//cellular metabolic process;GO:0008152//metabolic process;GO:0006260//DNA replication;GO:0009987//cellular process;GO:0071704//organic substance metabolic process;GO:0006259//DNA metabolic process;GO:0009058//biosynthetic process;GO:0090304//nucleic…
novel-m0128-3p	Unigene0100892	DOF5.4	1019	4	2	0.012	2	2	PREDICTED: dof zinc finger protein DOF5.4 [Vitis vinifera]	-	-	-
novel-m0128-3p	Unigene0043409	-	205	4.5	2	0.012	4	4	--	-	-	-
novel-m0128-3p	Unigene0043340	-	216	4.5	1	0.008	3	3	--	-	-	-
novel-m0128-3p	Unigene0078318	RPL13B	863	3	2	0.012	7	7	PREDICTED: 60S ribosomal protein L13-1 [Elaeis guineensis]	-	-	-
novel-m0128-3p	Unigene0063661	At3g22660	488	4	2	0.012	4	4	PREDICTED: probable rRNA-processing protein EBP2 homolog [Nelumbo nucifera]	GO:0044464//cell part;GO:0043226//organelle;GO:0043228//non-membrane-bounded organelle;GO:0043231//intracellular membrane-bounded organelle;GO:0044424//intracellular part;GO:0005623//cell;GO:0043232//intracellular non-membrane-bounded organelle;GO:0005622//intracellular;GO:0043227//membrane-bounded organelle;GO:0043229//intracellular organelle	-	GO:0071702//organic substance transport;GO:0051179//localization;GO:0045184//establishment of protein localization;GO:0006886//intracellular protein transport;GO:0044085//cellular component biogenesis;GO:0051234//establishment of localization;GO:0070727//cellular macromolecule localization;GO:0008104//protein localization;GO:1902578//single-organism localization;GO:0046907//intracellular transpor…
novel-m0128-3p	Unigene0033100	SKIP	990	4.5	2	0.012	8	8	PREDICTED: SNW/SKI-interacting protein-like [Nelumbo nucifera]	GO:0005622//intracellular;GO:1990904//ribonucleoprotein complex;GO:0032991//macromolecular complex;GO:0044464//cell part;GO:0030529//intracellular ribonucleoprotein complex;GO:0005623//cell;GO:0044424//intracellular part	-	-
novel-m0128-3p	Unigene0061064	CHI3	359	4.5	2	0.012	3	3	chalcone flavonone isomerase [Prunus persica]	-	GO:0003824//catalytic activity;GO:0016872//intramolecular lyase activity;GO:0016853//isomerase activity	GO:0008152//metabolic process;GO:0009812//flavonoid metabolic process;GO:0009416//response to light stimulus;GO:0042221//response to chemical;GO:1901700//response to oxygen-containing compound;GO:0034285//response to disaccharide;GO:0009743//response to carbohydrate;GO:0009411//response to UV;GO:0010033//response to organic substance;GO:0009628//response to abiotic stimulus;GO:0050896//response t…
novel-m0128-3p	Unigene0108390	Syncrip	2021	4	2	0.012	17	17	PREDICTED: heterogeneous nuclear ribonucleoprotein Q-like [Elaeis guineensis]	-	-	-
novel-m0128-3p	Unigene0012090	-	628	4.5	2	0.012	2	2	--	-	-	-
novel-m0128-3p	Unigene0043370	EIFSV1	737	4.5	2	0.012	11	11	eukaryotic translation initiation factor 5A4 [Camellia sinensis]	-	GO:1901363//heterocyclic compound binding;GO:0043021//ribonucleoprotein complex binding;GO:0097159//organic cyclic compound binding;GO:0003676//nucleic acid binding;GO:0005488//binding;GO:0044877//macromolecular complex binding;GO:0008135//translation factor activity, RNA binding;GO:0003723//RNA binding	GO:0010608//posttranscriptional regulation of gene expression;GO:0034248//regulation of cellular amide metabolic process;GO:0031323//regulation of cellular metabolic process;GO:0050789//regulation of biological process;GO:0031326//regulation of cellular biosynthetic process;GO:0080090//regulation of primary metabolic process;GO:0009889//regulation of biosynthetic process;GO:0010468//regulation of…
novel-m0128-3p	Unigene0045557	SPL5	748	3.5	2	0.012	3	3	squamosa promoter binding protein-like 3d [Platanus x hispanica]	-	-	-
novel-m0128-3p	Unigene0044756	CAT9	2744	4.5	2	0.012	5	2.5	PREDICTED: cationic amino acid transporter 9, chloroplastic [Nelumbo nucifera]	-	-	-
novel-m0128-3p	Unigene0065902	tmem56-b	979	4	2	0.012	3	3	PREDICTED: transmembrane protein 56 [Vitis vinifera]	GO:0016020//membrane;GO:0031224//intrinsic component of membrane;GO:0044425//membrane part	-	-
novel-m0128-3p	Unigene0052368	LARP1C	629	3.5	2	0.012	3	3	PREDICTED: la-related protein 1C-like isoform X1 [Nelumbo nucifera]	-	-	-
novel-m0128-3p	Unigene0032275	EML3	344	4	2	0.012	3	1.5	PREDICTED: protein EMSY-LIKE 3 isoform X3 [Nelumbo nucifera]	-	-	-
novel-m0128-3p	Unigene0075736	-	541	4	2	0.012	4	4	PREDICTED: eukaryotic translation initiation factor 3 subunit A [Elaeis guineensis]	-	-	-
novel-m0128-3p	Unigene0038637	-	203	2.5	2	0.012	2	2	PREDICTED: myosin heavy chain, striated muscle [Vitis vinifera]	-	-	-
novel-m0128-3p	Unigene0006475	phoD	610	4.5	2	0.012	6	6	PREDICTED: uncharacterized protein LOC104603847 isoform X1 [Nelumbo nucifera]	-	-	-
novel-m0128-3p	Unigene0073533	ATPAF1	1437	4.5	2	0.012	3	3	ATP synthase mitochondrial F1 complex assembly factor 1 [Morus notabilis]	-	-	GO:0071840//cellular component organization or biogenesis;GO:0044085//cellular component biogenesis;GO:0065003//macromolecular complex assembly;GO:0022607//cellular component assembly;GO:0009987//cellular process;GO:0043933//macromolecular complex subunit organization;GO:0016043//cellular component organization
novel-m0128-3p	Unigene0113587	-	337	4	2	0.012	3	3	PREDICTED: protein DEK [Vitis vinifera]	-	-	-
novel-m0128-3p	Unigene0102084	-	41	4	2	0.012	6	6	PREDICTED: myb-like protein H isoform X1 [Populus euphratica]	-	-	-
novel-m0128-3p	Unigene0038780	SF3B2	757	4.5	2	0.012	23	11.5	PREDICTED: splicing factor 3B subunit 2-like [Nelumbo nucifera]	-	-	-
novel-m0128-3p	Unigene0045230	SSR2	56	3	2	0.012	3	1.5	translocon-associated protein subunit beta [Ananas comosus]	GO:0044425//membrane part;GO:0031224//intrinsic component of membrane;GO:0016020//membrane	-	-
novel-m0128-3p	Unigene0045107	ARR14	296	4.5	2	0.012	4	4	PREDICTED: myb family transcription factor EFM [Nelumbo nucifera]	-	-	-
novel-m0128-3p	Unigene0073422	WEB1	577	4.5	2	0.012	5	5	PREDICTED: protein WEAK CHLOROPLAST MOVEMENT UNDER BLUE LIGHT 1 [Theobroma cacao]	-	-	-
novel-m0128-3p	Unigene0059020	RPS15AA	343	3.5	2	0.012	43	21.5	PREDICTED: 40S ribosomal protein S15a-1 [Arachis duranensis]	-	-	-
novel-m0128-3p	Unigene0060047	-	588	4.5	2	0.012	2	2	--	-	-	-
novel-m0128-3p	Unigene0056671	CEBPZ	1028	3.5	2	0.012	4	4	PREDICTED: CCAAT/enhancer-binding protein zeta isoform X1 [Nelumbo nucifera]	-	-	-
novel-m0128-3p	Unigene0023869	Mmtag2	687	3.5	2	0.012	3	3	MMtag domain-containing protein [Cephalotus follicularis]	-	-	-
novel-m0128-3p	Unigene0060788	-	382	3	1	0.008	2	2	--	-	-	-
novel-m0128-3p	Unigene0092454	PF13_0198	1548	4.5	2	0.012	2	2	PREDICTED: probable serine/threonine-protein kinase kinX [Daucus carota subsp. sativus] [Daucus carota]	-	-	-
novel-m0128-3p	Unigene0044869	Utp20	613	3.5	2	0.012	3	3	PREDICTED: LOW QUALITY PROTEIN: U3 small nucleolar RNA-associated protein 20-like [Phoenix dactylifera]	-	-	-
novel-m0128-3p	Unigene0010547	SNL4	1606	3	2	0.012	2	2	PREDICTED: paired amphipathic helix protein Sin3-like 4 isoform X3 [Nelumbo nucifera]	-	-	GO:0019222//regulation of metabolic process;GO:0065007//biological regulation;GO:0050789//regulation of biological process;GO:0060255//regulation of macromolecule metabolic process;GO:0010468//regulation of gene expression
novel-m0128-3p	Unigene0049920	Rrp36	884	3.5	2	0.012	4	4	PREDICTED: ribosomal RNA processing protein 36 homolog [Nelumbo nucifera]	-	-	-
novel-m0128-3p	Unigene0076099	VIII-1	272	4	2	0.012	2	2	PREDICTED: myosin-1-like [Nelumbo nucifera]	GO:0043229//intracellular organelle;GO:0044424//intracellular part;GO:0005622//intracellular;GO:0043232//intracellular non-membrane-bounded organelle;GO:0005856//cytoskeleton;GO:0043228//non-membrane-bounded organelle;GO:0005623//cell;GO:0043226//organelle;GO:0015629//actin cytoskeleton;GO:0044464//cell part	GO:0005488//binding;GO:1901363//heterocyclic compound binding;GO:0097159//organic cyclic compound binding;GO:0032549//ribonucleoside binding;GO:0016462//pyrophosphatase activity;GO:0016818//hydrolase activity, acting on acid anhydrides, in phosphorus-containing anhydrides;GO:0001883//purine nucleoside binding;GO:0097367//carbohydrate derivative binding;GO:0032550//purine ribonucleoside binding;GO…	-
novel-m0128-3p	Unigene0030514	-	65	4.5	2	0.012	2	2	--	-	-	-
novel-m0128-3p	Unigene0064487	-	473	3	2	0.012	2	2	DNA ligase 4 [Anthurium amnicola]	-	-	-
novel-m0128-3p	Unigene0045108	At2g44130	665	3.5	2	0.012	2	2	PREDICTED: F-box/kelch-repeat protein At1g15670-like [Nelumbo nucifera]	-	-	-
novel-m0128-3p	Unigene0065662	ATG8C	91	4	2	0.012	4	4	PREDICTED: autophagy-related protein 8C isoform X2 [Phoenix dactylifera]	-	-	-
novel-m0128-3p	Unigene0046576	Isy1	471	4.5	2	0.012	2	2	PREDICTED: pre-mRNA-splicing factor ISY1 homolog [Beta vulgaris subsp. vulgaris] [Beta vulgaris]	-	-	-
novel-m0128-3p	Unigene0109606	RABA5B	767	4.5	2	0.012	2	2	PREDICTED: ras-related protein RABA5d-like [Populus euphratica]	-	GO:0001883//purine nucleoside binding;GO:0032549//ribonucleoside binding;GO:0032550//purine ribonucleoside binding;GO:0003824//catalytic activity;GO:0097367//carbohydrate derivative binding;GO:0036094//small molecule binding;GO:1901363//heterocyclic compound binding;GO:0005488//binding;GO:0001882//nucleoside binding;GO:0097159//organic cyclic compound binding	GO:0065007//biological regulation;GO:0050794//regulation of cellular process;GO:0033036//macromolecule localization;GO:0051179//localization;GO:0007154//cell communication;GO:0050896//response to stimulus;GO:0035556//intracellular signal transduction;GO:0044700//single organism signaling;GO:0051716//cellular response to stimulus;GO:0050789//regulation of biological process;GO:0007165//signal tran…
novel-m0128-3p	Unigene0073924	RRP12	2785	4.5	2	0.012	3	3	PREDICTED: RRP12-like protein [Nelumbo nucifera]	-	-	-
novel-m0128-3p	Unigene0061175	ccmE	152	3	2	0.012	8	8	PREDICTED: cytochrome c-type biogenesis protein CcmE-like [Ziziphus jujuba]	-	-	-
novel-m0128-3p	Unigene0080380	ncm	2686	4	2	0.012	8	8	PREDICTED: pre-mRNA-splicing factor CWC22 homolog [Nelumbo nucifera]	GO:0005737//cytoplasm;GO:0043229//intracellular organelle;GO:0044444//cytoplasmic part;GO:0005623//cell;GO:0044464//cell part;GO:0043227//membrane-bounded organelle;GO:0005622//intracellular;GO:0043231//intracellular membrane-bounded organelle;GO:0044424//intracellular part;GO:0043226//organelle	GO:0003676//nucleic acid binding;GO:0097159//organic cyclic compound binding;GO:1901363//heterocyclic compound binding;GO:0005488//binding	GO:0071704//organic substance metabolic process;GO:0009987//cellular process;GO:0043170//macromolecule metabolic process;GO:0008152//metabolic process;GO:0044260//cellular macromolecule metabolic process;GO:0044237//cellular metabolic process
novel-m0128-3p	Unigene0079147	-	62	4	2	0.012	2	2	--	-	-	-
novel-m0128-3p	Unigene0108877	RANBP1C	480	4.5	2	0.012	3	3	Ran-binding protein 1-b-like protein [Morus notabilis]	-	-	-
novel-m0128-3p	Unigene0019101	ATL6	1035	4.5	1	0.008	7	7	PREDICTED: E3 ubiquitin-protein ligase ATL6-like [Nelumbo nucifera]	-	-	-
novel-m0128-3p	Unigene0059020	RPS15AA	342	4.5	2	0.012	54	27	PREDICTED: 40S ribosomal protein S15a-1 [Arachis duranensis]	-	-	-
novel-m0128-3p	Unigene0059022	RPS15AA	287	4.5	2	0.012	54	27	PREDICTED: 40S ribosomal protein S15a-1-like [Gossypium hirsutum]	-	-	-
novel-m0128-3p	Unigene0083802	PPF-1	146	4.5	2	0.012	3	3	inner membrane protein PPF-1, chloroplastic-like isoform X1 [Ananas comosus]	-	-	-
novel-m0128-3p	Unigene0045819	-	1342	4	2	0.012	3	3	PREDICTED: midasin-like [Nelumbo nucifera]	-	-	-
novel-m0128-3p	Unigene0004620	-	491	4.5	2	0.012	4	4	PREDICTED: proline-rich transmembrane protein 1-like [Musa acuminata subsp. malaccensis] [Musa acuminata]	-	-	-
novel-m0128-3p	Unigene0005621	-	87	4.5	2	0.012	6	6	--	-	-	-
novel-m0128-3p	Unigene0052495	bcsl1b	773	4.5	2	0.012	4	4	PREDICTED: AAA-ATPase ASD, mitochondrial-like [Citrus sinensis]	-	GO:0036094//small molecule binding;GO:0097367//carbohydrate derivative binding;GO:0097159//organic cyclic compound binding;GO:0032550//purine ribonucleoside binding;GO:0001883//purine nucleoside binding;GO:1901363//heterocyclic compound binding;GO:0005488//binding;GO:0001882//nucleoside binding;GO:0032549//ribonucleoside binding	-
novel-m0128-3p	Unigene0062009	LPEAT2	19	4	1	0.008	2	2	PREDICTED: lysophospholipid acyltransferase LPEAT2 isoform X2 [Nelumbo nucifera]	GO:0044425//membrane part;GO:0031224//intrinsic component of membrane;GO:0016020//membrane	GO:0003824//catalytic activity;GO:0016746//transferase activity, transferring acyl groups;GO:0016747//transferase activity, transferring acyl groups other than amino-acyl groups;GO:0016740//transferase activity	GO:0006796//phosphate-containing compound metabolic process;GO:0044238//primary metabolic process;GO:0044237//cellular metabolic process;GO:0006793//phosphorus metabolic process;GO:0044710//single-organism metabolic process;GO:0046486//glycerolipid metabolic process;GO:0008152//metabolic process;GO:0006650//glycerophospholipid metabolic process;GO:0046471//phosphatidylglycerol metabolic process;G…
novel-m0128-3p	Unigene0063661	At3g22660	788	3.5	2	0.012	3	3	PREDICTED: probable rRNA-processing protein EBP2 homolog [Nelumbo nucifera]	GO:0044464//cell part;GO:0043226//organelle;GO:0043228//non-membrane-bounded organelle;GO:0043231//intracellular membrane-bounded organelle;GO:0044424//intracellular part;GO:0005623//cell;GO:0043232//intracellular non-membrane-bounded organelle;GO:0005622//intracellular;GO:0043227//membrane-bounded organelle;GO:0043229//intracellular organelle	-	GO:0071702//organic substance transport;GO:0051179//localization;GO:0045184//establishment of protein localization;GO:0006886//intracellular protein transport;GO:0044085//cellular component biogenesis;GO:0051234//establishment of localization;GO:0070727//cellular macromolecule localization;GO:0008104//protein localization;GO:1902578//single-organism localization;GO:0046907//intracellular transpor…
novel-m0128-3p	Unigene0055990	-	227	4.5	2	0.012	3	1.5	PREDICTED: zinc finger matrin-type protein 2 [Beta vulgaris subsp. vulgaris] [Beta vulgaris]	-	GO:0046872//metal ion binding;GO:0005488//binding;GO:0043169//cation binding;GO:0046914//transition metal ion binding;GO:0043167//ion binding	-
novel-m0128-3p	Unigene0011283	CER1	735	4.5	2	0.012	4	4	protein ECERIFERUM 1 isoform X2 [Asparagus officinalis]	GO:0016020//membrane	-	GO:0044699//single-organism process;GO:0008152//metabolic process;GO:0044710//single-organism metabolic process
novel-m0128-3p	Unigene0049034	HPD	1490	4	2	0.012	13	13	PREDICTED: 4-hydroxyphenylpyruvate dioxygenase [Nelumbo nucifera]	-	GO:0003824//catalytic activity;GO:0005488//binding;GO:0043169//cation binding;GO:0043167//ion binding;GO:0016491//oxidoreductase activity	GO:0043436//oxoacid metabolic process;GO:0071704//organic substance metabolic process;GO:0006082//organic acid metabolic process;GO:0044238//primary metabolic process;GO:0044699//single-organism process;GO:0009987//cellular process;GO:0044281//small molecule metabolic process;GO:0044237//cellular metabolic process;GO:1901564//organonitrogen compound metabolic process;GO:0019752//carboxylic acid m…
novel-m0128-3p	Unigene0074703	WRKY20	1016	4.5	2	0.012	6	6	PREDICTED: probable WRKY transcription factor 20 [Nelumbo nucifera]	-	-	-
novel-m0128-3p	Unigene0038781	SF3B2	754	4.5	2	0.012	45	22.5	PREDICTED: splicing factor 3B subunit 2-like [Nelumbo nucifera]	-	-	-
novel-m0128-3p	Unigene0004325	-	1447	4.5	2	0.012	2	1	S-adenosyl-L-methionine-dependent methyltransferases superfamily protein isoform 2 [Theobroma cacao]	-	GO:0003824//catalytic activity;GO:0016740//transferase activity	-
novel-m0128-3p	Unigene0082761	AUL1	1474	4	2	0.012	3	3	PREDICTED: auxilin-like protein 1 [Nelumbo nucifera]	-	-	-
novel-m0128-3p	Unigene0066947	PCFS4	2437	4	2	0.012	6	6	PREDICTED: polyadenylation and cleavage factor homolog 4-like isoform X1 [Nelumbo nucifera]	-	-	-
novel-m0128-3p	Unigene0056952	BLH1	398	4.5	2	0.012	16	16	PREDICTED: BEL1-like homeodomain protein 1 [Nelumbo nucifera]	-	GO:0005488//binding	GO:0051716//cellular response to stimulus;GO:0009058//biosynthetic process;GO:1901576//organic substance biosynthetic process;GO:0044237//cellular metabolic process;GO:0006950//response to stress;GO:0009987//cellular process;GO:0006807//nitrogen compound metabolic process;GO:0065007//biological regulation;GO:0050896//response to stimulus;GO:0071704//organic substance metabolic process;GO:0042221/…
novel-m0128-3p	Unigene0053739	-	238	4.5	2	0.012	319	319	PREDICTED: auxin-repressed 12.5 kDa protein [Nelumbo nucifera]	-	-	-
novel-m0128-3p	Unigene0036157	-	242	4	2	0.012	4	4	titin homolog [Asparagus officinalis]	-	-	-
novel-m0128-3p	Unigene0045874	-	589	4.5	2	0.012	4	2	PREDICTED: heavy metal-associated isoprenylated plant protein 3-like [Nelumbo nucifera]	-	-	-
novel-m0128-3p	Unigene0077091	RD22	1064	4	2	0.012	23	23	PREDICTED: BURP domain protein RD22 [Nelumbo nucifera]	-	-	-
novel-m0128-3p	Unigene0015327	-	832	4.5	2	0.012	2	2	--	-	-	-
novel-m0128-3p	Unigene0062175	SMC1	888	4	2	0.012	2	2	structural maintenance of chromosomes protein 1, partial [Chimonanthus praecox]	GO:0043231//intracellular membrane-bounded organelle;GO:0044424//intracellular part;GO:0005623//cell;GO:0043232//intracellular non-membrane-bounded organelle;GO:0043229//intracellular organelle;GO:0043227//membrane-bounded organelle;GO:0005622//intracellular;GO:0043228//non-membrane-bounded organelle;GO:0044464//cell part;GO:0043226//organelle;GO:0032991//macromolecular complex;GO:0043234//protei…	GO:0001883//purine nucleoside binding;GO:1901363//heterocyclic compound binding;GO:0005488//binding;GO:0005515//protein binding;GO:0097367//carbohydrate derivative binding;GO:0032549//ribonucleoside binding;GO:0036094//small molecule binding;GO:0097159//organic cyclic compound binding;GO:0032550//purine ribonucleoside binding;GO:0046983//protein dimerization activity;GO:0001882//nucleoside binding	GO:0044260//cellular macromolecule metabolic process;GO:0043170//macromolecule metabolic process;GO:0044763//single-organism cellular process;GO:0044237//cellular metabolic process;GO:1901360//organic cyclic compound metabolic process;GO:0006259//DNA metabolic process;GO:0000280//nuclear division;GO:0051716//cellular response to stimulus;GO:0071704//organic substance metabolic process;GO:0006807/…
novel-m0128-3p	Unigene0027813	At4g19190	1486	4.5	2	0.012	2	2	PREDICTED: uncharacterized zinc finger CCHC domain-containing protein At4g19190 [Elaeis guineensis]	-	GO:0005488//binding;GO:0046914//transition metal ion binding;GO:0043169//cation binding;GO:0043167//ion binding;GO:0046872//metal ion binding	-
novel-m0128-3p	Unigene0107792	-	19	2.5	2	0.012	2	2	glutamate racemase [Arabidopsis thaliana]	-	-	-
novel-m0128-3p	Unigene0077313	MSBP2	520	4.5	2	0.012	2	2	PREDICTED: membrane steroid-binding protein 2-like [Nelumbo nucifera]	GO:0044424//intracellular part;GO:0044464//cell part;GO:0043229//intracellular organelle;GO:0005622//intracellular;GO:0043227//membrane-bounded organelle;GO:0016020//membrane;GO:0043231//intracellular membrane-bounded organelle;GO:0043226//organelle;GO:0005623//cell	-	-
novel-m0128-3p	Unigene0059582	RH40	1634	4	2	0.012	3	3	PREDICTED: DEAD-box ATP-dependent RNA helicase 46 [Ziziphus jujuba]	-	GO:0003824//catalytic activity;GO:0016787//hydrolase activity;GO:0097159//organic cyclic compound binding;GO:0005488//binding;GO:1901363//heterocyclic compound binding	GO:0008152//metabolic process;GO:0071704//organic substance metabolic process;GO:0044237//cellular metabolic process;GO:0044238//primary metabolic process;GO:0071840//cellular component organization or biogenesis;GO:0009987//cellular process
novel-m0128-3p	Unigene0065902	tmem56-b	978	4	2	0.012	4	4	PREDICTED: transmembrane protein 56 [Vitis vinifera]	GO:0016020//membrane;GO:0031224//intrinsic component of membrane;GO:0044425//membrane part	-	-
novel-m0128-3p	Unigene0062498	MODA	179	4.5	2	0.012	2	2	PREDICTED: NADP-dependent malic enzyme isoform X2 [Nelumbo nucifera]	GO:0043226//organelle;GO:0044444//cytoplasmic part;GO:0009536//plastid;GO:0044424//intracellular part;GO:0044464//cell part;GO:0043231//intracellular membrane-bounded organelle;GO:0043229//intracellular organelle;GO:0043227//membrane-bounded organelle;GO:0005623//cell;GO:0005737//cytoplasm;GO:0005622//intracellular	GO:0043167//ion binding;GO:0043169//cation binding;GO:0016614//oxidoreductase activity, acting on CH-OH group of donors;GO:0005488//binding;GO:0016491//oxidoreductase activity;GO:0016615//malate dehydrogenase activity;GO:1901363//heterocyclic compound binding;GO:0097159//organic cyclic compound binding;GO:0046983//protein dimerization activity;GO:0046872//metal ion binding;GO:1901265//nucleoside …	GO:0016043//cellular component organization;GO:0005975//carbohydrate metabolic process;GO:0019318//hexose metabolic process;GO:0030163//protein catabolic process;GO:0044699//single-organism process;GO:0006508//proteolysis;GO:0006461//protein complex assembly;GO:0051259//protein oligomerization;GO:0043436//oxoacid metabolic process;GO:1901575//organic substance catabolic process;GO:0071840//cellul…
novel-m0128-3p	Unigene0049927	ACLB-1	2001	4.5	2	0.012	10	10	PREDICTED: ATP-citrate synthase beta chain protein 1 [Elaeis guineensis]	-	-	-
novel-m0128-3p	Unigene0078296	UVH1	987	3	2	0.012	3	3	PREDICTED: DNA repair endonuclease UVH1 isoform X2 [Vitis vinifera]	-	GO:0016788//hydrolase activity, acting on ester bonds;GO:0016787//hydrolase activity;GO:0004518//nuclease activity;GO:0003824//catalytic activity	GO:0008152//metabolic process;GO:1901360//organic cyclic compound metabolic process;GO:0071704//organic substance metabolic process;GO:0006807//nitrogen compound metabolic process;GO:0043170//macromolecule metabolic process;GO:0034641//cellular nitrogen compound metabolic process;GO:0006725//cellular aromatic compound metabolic process;GO:0006139//nucleobase-containing compound metabolic process;…
novel-m0128-3p	Unigene0086221	YDA	4183	4.5	2	0.012	10	10	PREDICTED: mitogen-activated protein kinase kinase kinase YODA-like [Nelumbo nucifera]	-	GO:0003824//catalytic activity;GO:0016772//transferase activity, transferring phosphorus-containing groups;GO:0016740//transferase activity;GO:0016301//kinase activity	GO:0044237//cellular metabolic process;GO:0008152//metabolic process;GO:0009987//cellular process;GO:0006796//phosphate-containing compound metabolic process;GO:0006793//phosphorus metabolic process
novel-m0128-3p	Unigene0005975	HAT2	2007	4.5	2	0.012	3	3	PREDICTED: homeobox-leucine zipper protein HAT4 [Nelumbo nucifera]	-	-	GO:0044260//cellular macromolecule metabolic process;GO:1901576//organic substance biosynthetic process;GO:0009058//biosynthetic process;GO:0043170//macromolecule metabolic process;GO:0009059//macromolecule biosynthetic process;GO:0071704//organic substance metabolic process;GO:0044249//cellular biosynthetic process;GO:0044237//cellular metabolic process;GO:0010467//gene expression;GO:0009987//ce…
novel-m0128-3p	Unigene0048172	RBM28	469	4.5	2	0.012	2	2	PREDICTED: RNA-binding protein 28 isoform X1 [Nelumbo nucifera]	-	-	-
novel-m0128-3p	Unigene0068695	-	665	3.5	2	0.012	3	3	--	-	-	-
novel-m0128-3p	Unigene0027172	PSK5	130	4.5	2	0.012	3	3	PREDICTED: phytosulfokines 2 [Elaeis guineensis]	-	-	-
novel-m0128-3p	Unigene0092187	CIPK6	145	4.5	2	0.012	15	15	PREDICTED: CBL-interacting serine/threonine-protein kinase 6-like [Nelumbo nucifera]	GO:0005623//cell;GO:0043231//intracellular membrane-bounded organelle;GO:0043227//membrane-bounded organelle;GO:0044464//cell part;GO:0005622//intracellular;GO:0044424//intracellular part;GO:0043229//intracellular organelle;GO:0043226//organelle	GO:0016301//kinase activity;GO:0032550//purine ribonucleoside binding;GO:0032549//ribonucleoside binding;GO:0016740//transferase activity;GO:0016772//transferase activity, transferring phosphorus-containing groups;GO:0036094//small molecule binding;GO:0005488//binding;GO:0001883//purine nucleoside binding;GO:0016773//phosphotransferase activity, alcohol group as acceptor;GO:0097367//carbohydrate …	GO:0010817//regulation of hormone levels;GO:0044237//cellular metabolic process;GO:0006810//transport;GO:0006464//cellular protein modification process;GO:0007154//cell communication;GO:0019932//second-messenger-mediated signaling;GO:0006793//phosphorus metabolic process;GO:0065008//regulation of biological quality;GO:0032501//multicellular organismal process;GO:0065007//biological regulation;GO:…
novel-m0128-3p	Unigene0044656	At3g07070	469	4.5	2	0.012	3	3	Kinase superfamily protein [Theobroma cacao]	-	GO:0003824//catalytic activity;GO:0016740//transferase activity;GO:0016773//phosphotransferase activity, alcohol group as acceptor;GO:0016772//transferase activity, transferring phosphorus-containing groups;GO:0004672//protein kinase activity;GO:0016301//kinase activity	GO:0006793//phosphorus metabolic process;GO:0019538//protein metabolic process;GO:0044267//cellular protein metabolic process;GO:0044237//cellular metabolic process;GO:0043170//macromolecule metabolic process;GO:0071704//organic substance metabolic process;GO:0043412//macromolecule modification;GO:0006468//protein phosphorylation;GO:0044238//primary metabolic process;GO:0008152//metabolic process…
novel-m0128-3p	Unigene0028020	BP-73	959	4	2	0.012	2	2	PREDICTED: rho-N domain-containing protein 1, chloroplastic [Nelumbo nucifera]	-	-	-
novel-m0128-3p	Unigene0038780	SF3B2	754	4.5	2	0.012	45	22.5	PREDICTED: splicing factor 3B subunit 2-like [Nelumbo nucifera]	-	-	-
novel-m0128-3p	Unigene0044755	CAT9	2387	4.5	2	0.012	5	2.5	PREDICTED: cationic amino acid transporter 9, chloroplastic [Nelumbo nucifera]	-	-	-
novel-m0128-3p	Unigene0080239	-	2353	4.5	2	0.012	3	3	PREDICTED: suppressor protein SRP40 isoform X1 [Citrus sinensis]	-	-	-
novel-m0128-3p	Unigene0067621	CLSY1	508	4	2	0.012	2	1	PREDICTED: SNF2 domain-containing protein CLASSY 1-like [Nelumbo nucifera]	-	-	-
novel-m0128-3p	Unigene0026840	KRI1	380	4.5	2	0.012	2	2	PREDICTED: protein KRI1 homolog [Nelumbo nucifera]	-	-	-
novel-m0128-3p	Unigene0103776	RPL7B	1081	3.5	2	0.012	2	2	PREDICTED: 60S ribosomal protein L7-2-like [Nelumbo nucifera]	GO:0032991//macromolecular complex	-	-
novel-m0128-3p	Unigene0070488	ARPC5A	565	4.5	2	0.012	5	5	PREDICTED: actin-related protein 2/3 complex subunit 5A [Fragaria vesca subsp. vesca] [Fragaria vesca]	GO:0043229//intracellular organelle;GO:0005623//cell;GO:0005856//cytoskeleton;GO:0005622//intracellular;GO:0043226//organelle;GO:0043232//intracellular non-membrane-bounded organelle;GO:0044464//cell part;GO:0043234//protein complex;GO:0044424//intracellular part;GO:0043228//non-membrane-bounded organelle;GO:0032991//macromolecular complex	-	GO:0007010//cytoskeleton organization;GO:0030833//regulation of actin filament polymerization;GO:0008064//regulation of actin polymerization or depolymerization;GO:0009987//cellular process;GO:0048518//positive regulation of biological process;GO:0071822//protein complex subunit organization;GO:0048522//positive regulation of cellular process;GO:0033043//regulation of organelle organization;GO:00…
novel-m0128-3p	Unigene0108877	RANBP1C	479	3	2	0.012	5	5	Ran-binding protein 1-b-like protein [Morus notabilis]	-	-	-
novel-m0128-3p	Unigene0064487	-	472	4	2	0.012	2	2	DNA ligase 4 [Anthurium amnicola]	-	-	-
novel-m0128-3p	Unigene0010121	-	324	4	2	0.012	8	8	Tetratricopeptide-like helical [Cynara cardunculus var. scolymus] [Cynara cardunculus]	-	-	-
novel-m0128-3p	Unigene0088290	ASIL2	266	4	2	0.012	2	2	PREDICTED: trihelix transcription factor ASIL1 [Amborella trichopoda]	-	-	-
novel-m0128-3p	Unigene0002188	-	532	4.5	2	0.012	2	2	hypothetical protein ARALYDRAFT_920038 [Arabidopsis lyrata subsp. lyrata] [Arabidopsis lyrata]	-	-	-
novel-m0128-3p	Unigene0068802	NOP5-2	187	4	2	0.012	9	9	PREDICTED: probable nucleolar protein 5-2 isoform X2 [Nelumbo nucifera]	-	-	-
novel-m0128-3p	Unigene0018466	-	518	4	2	0.012	3	3	PREDICTED: mediator of RNA polymerase II transcription subunit 1 [Vitis vinifera]	-	-	-
novel-m0128-3p	Unigene0039173	MYOB3	71	4.5	2	0.012	3	3	PREDICTED: myosin-binding protein 2 [Nelumbo nucifera]	-	-	-
novel-m0128-3p	Unigene0062816	EXPA11	53	4.5	2	0.012	4	4	expansin [Chimonanthus praecox]	GO:0030312//external encapsulating structure;GO:0071944//cell periphery;GO:0005623//cell;GO:0044464//cell part	-	GO:0045229//external encapsulating structure organization;GO:0071840//cellular component organization or biogenesis;GO:0071554//cell wall organization or biogenesis;GO:0016043//cellular component organization;GO:0071555//cell wall organization;GO:0009987//cellular process
novel-m0128-3p	Unigene0059706	SFH1	1295	4.5	2	0.012	2	2	PREDICTED: phosphatidylinositol/phosphatidylcholine transfer protein SFH1-like [Nelumbo nucifera]	-	-	-
novel-m0128-3p	Unigene0006862	-	548	2.5	2	0.012	2	2	--	-	-	-
novel-m0128-3p	Unigene0088722	NOP56	468	3.5	2	0.012	30	30	PREDICTED: nucleolar protein 56 [Elaeis guineensis]	-	-	-
novel-m0128-3p	Unigene0039985	At5g13110	532	4	2	0.012	2	1	PREDICTED: glucose-6-phosphate 1-dehydrogenase, chloroplastic [Elaeis guineensis]	-	GO:0003824//catalytic activity;GO:0005488//binding;GO:0097159//organic cyclic compound binding;GO:0000166//nucleotide binding;GO:1901363//heterocyclic compound binding;GO:0036094//small molecule binding;GO:1901265//nucleoside phosphate binding	GO:0071704//organic substance metabolic process;GO:0008152//metabolic process;GO:0044699//single-organism process;GO:0019318//hexose metabolic process;GO:0044710//single-organism metabolic process;GO:0044723//single-organism carbohydrate metabolic process;GO:0044281//small molecule metabolic process;GO:0005975//carbohydrate metabolic process;GO:0005996//monosaccharide metabolic process;GO:0044238…
novel-m0128-3p	Unigene0053710	RPL24	263	3.5	2	0.012	2	2	60S ribosomal L24 [Gossypium arboreum]	-	-	-
novel-m0128-3p	Unigene0033205	RAF2	294	4	2	0.012	10	10	PREDICTED: rubisco accumulation factor 1, chloroplastic [Juglans regia]	-	-	-
novel-m0128-3p	Unigene0051451	SUFE1	814	4.5	2	0.012	2	2	PREDICTED: sufE-like protein 1, chloroplastic/mitochondrial [Jatropha curcas]	-	-	-
novel-m0128-3p	Unigene0027172	PSK5	131	4.5	2	0.012	2	2	PREDICTED: phytosulfokines 2 [Elaeis guineensis]	-	-	-
novel-m0128-3p	Unigene0062319	tbl1xr1-b	1602	4.5	2	0.012	4	2	PREDICTED: F-box-like/WD repeat-containing protein TBL1XR1 [Nelumbo nucifera]	-	-	-
novel-m0128-3p	Unigene0018314	-	64	4.5	2	0.012	2	2	--	-	-	-
novel-m0128-3p	Unigene0062175	SMC1	3303	4.5	2	0.012	9	9	structural maintenance of chromosomes protein 1, partial [Chimonanthus praecox]	GO:0043231//intracellular membrane-bounded organelle;GO:0044424//intracellular part;GO:0005623//cell;GO:0043232//intracellular non-membrane-bounded organelle;GO:0043229//intracellular organelle;GO:0043227//membrane-bounded organelle;GO:0005622//intracellular;GO:0043228//non-membrane-bounded organelle;GO:0044464//cell part;GO:0043226//organelle;GO:0032991//macromolecular complex;GO:0043234//protei…	GO:0001883//purine nucleoside binding;GO:1901363//heterocyclic compound binding;GO:0005488//binding;GO:0005515//protein binding;GO:0097367//carbohydrate derivative binding;GO:0032549//ribonucleoside binding;GO:0036094//small molecule binding;GO:0097159//organic cyclic compound binding;GO:0032550//purine ribonucleoside binding;GO:0046983//protein dimerization activity;GO:0001882//nucleoside binding	GO:0044260//cellular macromolecule metabolic process;GO:0043170//macromolecule metabolic process;GO:0044763//single-organism cellular process;GO:0044237//cellular metabolic process;GO:1901360//organic cyclic compound metabolic process;GO:0006259//DNA metabolic process;GO:0000280//nuclear division;GO:0051716//cellular response to stimulus;GO:0071704//organic substance metabolic process;GO:0006807/…
novel-m0128-3p	Unigene0082761	AUL1	3246	4.5	2	0.012	3	3	PREDICTED: auxilin-like protein 1 [Nelumbo nucifera]	-	-	-
novel-m0128-3p	Unigene0010424	TRO	900	4.5	2	0.012	2	2	PREDICTED: LOW QUALITY PROTEIN: protein TRAUCO-like [Elaeis guineensis]	-	-	-
novel-m0128-3p	Unigene0042849	WCRKC2	275	4.5	2	0.012	4	2	PREDICTED: thioredoxin-like 3-2, chloroplastic isoform X2 [Eucalyptus grandis]	GO:0043229//intracellular organelle;GO:0044435//plastid part;GO:0005737//cytoplasm;GO:0044424//intracellular part;GO:0044464//cell part;GO:0043231//intracellular membrane-bounded organelle;GO:0043226//organelle;GO:0044444//cytoplasmic part;GO:0009532//plastid stroma;GO:0005623//cell;GO:0009536//plastid;GO:0044422//organelle part;GO:0044446//intracellular organelle part;GO:0005622//intracellular;G…	GO:0003824//catalytic activity;GO:0016667//oxidoreductase activity, acting on a sulfur group of donors;GO:0015036//disulfide oxidoreductase activity;GO:0016491//oxidoreductase activity	GO:0008152//metabolic process;GO:0044763//single-organism cellular process;GO:0065008//regulation of biological quality;GO:0042592//homeostatic process;GO:0009987//cellular process;GO:0065007//biological regulation;GO:0044710//single-organism metabolic process;GO:0044699//single-organism process;GO:0019725//cellular homeostasis
novel-m0128-3p	Unigene0055987	Zmat2	227	4.5	2	0.012	3	1.5	PREDICTED: zinc finger matrin-type protein 2 isoform X1 [Ziziphus jujuba]	-	GO:0043167//ion binding;GO:0005488//binding;GO:0043169//cation binding;GO:0046914//transition metal ion binding;GO:0046872//metal ion binding	-
novel-m0128-3p	Unigene0045229	SSR2	56	3	2	0.012	3	1.5	PREDICTED: translocon-associated protein subunit beta-like [Nelumbo nucifera]	GO:0044422//organelle part;GO:0031090//organelle membrane;GO:0005622//intracellular;GO:0016020//membrane;GO:0043229//intracellular organelle;GO:0043226//organelle;GO:0005623//cell;GO:0044425//membrane part;GO:0005911//cell-cell junction;GO:0043231//intracellular membrane-bounded organelle;GO:0031224//intrinsic component of membrane;GO:0043227//membrane-bounded organelle;GO:0030054//cell junction;…	-	GO:0033554//cellular response to stress;GO:0098542//defense response to other organism;GO:0006950//response to stress;GO:0009987//cellular process;GO:0050896//response to stimulus;GO:0009605//response to external stimulus;GO:0043207//response to external biotic stimulus;GO:0006952//defense response;GO:0006955//immune response;GO:0002376//immune system process;GO:0045087//innate immune response;GO…
novel-m0128-3p	Unigene0088290	ASIL2	267	3.5	2	0.012	6	6	PREDICTED: trihelix transcription factor ASIL1 [Amborella trichopoda]	-	-	-
novel-m0128-3p	Unigene0045874	-	1166	4.5	2	0.012	3	3	PREDICTED: heavy metal-associated isoprenylated plant protein 3-like [Nelumbo nucifera]	-	-	-
novel-m0128-3p	Unigene0051525	OsI_01383	1494	3	2	0.012	9	9	PREDICTED: glucosidase 2 subunit beta isoform X1 [Vitis vinifera]	-	-	GO:0044763//single-organism cellular process;GO:0071704//organic substance metabolic process;GO:0009058//biosynthetic process;GO:0008152//metabolic process;GO:0009987//cellular process;GO:0044249//cellular biosynthetic process;GO:0044710//single-organism metabolic process;GO:0044238//primary metabolic process;GO:1901576//organic substance biosynthetic process;GO:0044237//cellular metabolic proces…
novel-m0128-3p	Unigene0092860	At5g01610	55	4	0	0.034	58	58	PREDICTED: uncharacterized protein LOC104592265 [Nelumbo nucifera]	-	-	-
novel-m0128-3p	Unigene0059022	RPS15AA	288	3.5	2	0.012	43	21.5	PREDICTED: 40S ribosomal protein S15a-1-like [Gossypium hirsutum]	-	-	-
novel-m0128-3p	Unigene0044656	At3g07070	517	4.5	2	0.012	2	2	Kinase superfamily protein [Theobroma cacao]	-	GO:0003824//catalytic activity;GO:0016740//transferase activity;GO:0016773//phosphotransferase activity, alcohol group as acceptor;GO:0016772//transferase activity, transferring phosphorus-containing groups;GO:0004672//protein kinase activity;GO:0016301//kinase activity	GO:0006793//phosphorus metabolic process;GO:0019538//protein metabolic process;GO:0044267//cellular protein metabolic process;GO:0044237//cellular metabolic process;GO:0043170//macromolecule metabolic process;GO:0071704//organic substance metabolic process;GO:0043412//macromolecule modification;GO:0006468//protein phosphorylation;GO:0044238//primary metabolic process;GO:0008152//metabolic process…
novel-m0128-3p	Unigene0038182	HMGB7	422	4.5	2	0.012	2	2	High mobility group B protein 7 [Anthurium amnicola]	GO:0005622//intracellular;GO:0043226//organelle;GO:0043229//intracellular organelle;GO:0043231//intracellular membrane-bounded organelle;GO:0005623//cell;GO:0044464//cell part;GO:0044424//intracellular part;GO:0043227//membrane-bounded organelle	GO:0001071//nucleic acid binding transcription factor activity	GO:0006139//nucleobase-containing compound metabolic process;GO:0065007//biological regulation;GO:0043170//macromolecule metabolic process;GO:0044237//cellular metabolic process;GO:0008152//metabolic process;GO:0006260//DNA replication;GO:0009987//cellular process;GO:0071704//organic substance metabolic process;GO:0006259//DNA metabolic process;GO:0009058//biosynthetic process;GO:0090304//nucleic…
novel-m0128-3p	Unigene0023187	NAF1	1713	4.5	2	0.012	5	5	PREDICTED: H/ACA ribonucleoprotein complex non-core subunit NAF1-like [Nelumbo nucifera]	-	-	-
novel-m0128-3p	Unigene0092187	CIPK6	642	3	2	0.012	5	5	PREDICTED: CBL-interacting serine/threonine-protein kinase 6-like [Nelumbo nucifera]	GO:0005623//cell;GO:0043231//intracellular membrane-bounded organelle;GO:0043227//membrane-bounded organelle;GO:0044464//cell part;GO:0005622//intracellular;GO:0044424//intracellular part;GO:0043229//intracellular organelle;GO:0043226//organelle	GO:0016301//kinase activity;GO:0032550//purine ribonucleoside binding;GO:0032549//ribonucleoside binding;GO:0016740//transferase activity;GO:0016772//transferase activity, transferring phosphorus-containing groups;GO:0036094//small molecule binding;GO:0005488//binding;GO:0001883//purine nucleoside binding;GO:0016773//phosphotransferase activity, alcohol group as acceptor;GO:0097367//carbohydrate …	GO:0010817//regulation of hormone levels;GO:0044237//cellular metabolic process;GO:0006810//transport;GO:0006464//cellular protein modification process;GO:0007154//cell communication;GO:0019932//second-messenger-mediated signaling;GO:0006793//phosphorus metabolic process;GO:0065008//regulation of biological quality;GO:0032501//multicellular organismal process;GO:0065007//biological regulation;GO:…
novel-m0128-3p	Unigene0062318	tbl1xr1-b	1476	4.5	2	0.012	4	2	PREDICTED: F-box-like/WD repeat-containing protein TBL1XR1 [Nelumbo nucifera]	-	-	-
novel-m0128-3p	Unigene0028321	-	2338	4.5	2	0.012	3	3	PREDICTED: stress response protein nst1 [Vitis vinifera]	-	-	-
novel-m0128-3p	Unigene0030276	TOP1	1605	3.5	2	0.012	5	2.5	PREDICTED: DNA topoisomerase 1 alpha-like [Nelumbo nucifera]	-	GO:0003916//DNA topoisomerase activity;GO:0016853//isomerase activity;GO:0003824//catalytic activity	-
novel-m0128-3p	Unigene0083574	ABCG39	1898	4	2	0.012	4	4	PREDICTED: ABC transporter G family member 39-like [Nelumbo nucifera]	-	-	-
novel-m0128-3p	Unigene0077091	RD22	1065	4.5	2	0.012	30	30	PREDICTED: BURP domain protein RD22 [Nelumbo nucifera]	-	-	-
novel-m0128-3p	Unigene0055705	-	1981	4	2	0.012	4	4	PREDICTED: titin [Beta vulgaris subsp. vulgaris] [Beta vulgaris]	-	-	-
novel-m0128-3p	Unigene0030277	TOP1	3133	3.5	2	0.012	5	2.5	PREDICTED: DNA topoisomerase 1 alpha-like [Nelumbo nucifera]	-	-	-
novel-m0128-3p	Unigene0046232	FUL-like	591	4	2	0.012	3	3	AP1, partial [Persea americana]	GO:0044464//cell part;GO:0043231//intracellular membrane-bounded organelle;GO:0005623//cell;GO:0043229//intracellular organelle;GO:0044424//intracellular part;GO:0043227//membrane-bounded organelle;GO:0043226//organelle;GO:0005622//intracellular	GO:0005488//binding;GO:0005515//protein binding;GO:0001071//nucleic acid binding transcription factor activity	GO:0042440//pigment metabolic process;GO:0051239//regulation of multicellular organismal process;GO:0048507//meristem development;GO:0050789//regulation of biological process;GO:0044260//cellular macromolecule metabolic process;GO:0065007//biological regulation;GO:0009812//flavonoid metabolic process;GO:0044767//single-organism developmental process;GO:0010074//maintenance of meristem identity;GO…
novel-m0128-3p	Unigene0071105	At2g30600/At2g30610	2754	4	2	0.012	6	6	PREDICTED: BTB/POZ domain-containing protein At2g30600 [Nelumbo nucifera]	-	-	-
novel-m0128-3p	Unigene0004828	At3g61360	14	4.5	2	0.012	3	3	PREDICTED: pentatricopeptide repeat-containing protein At3g61360 [Nelumbo nucifera]	-	-	-
novel-m0128-3p	Unigene0042555	-	263	4.5	2	0.012	5	5	--	-	-	-
novel-m0128-3p	Unigene0042240	-	1942	4.5	2	0.012	2	1	S-adenosyl-L-methionine-dependent methyltransferases superfamily protein isoform 2 [Theobroma cacao]	-	GO:0003824//catalytic activity;GO:0016740//transferase activity	-
novel-m0128-3p	Unigene0067618	CLSY1	508	4	2	0.012	2	1	PREDICTED: SNF2 domain-containing protein CLASSY 2-like [Vigna angularis]	-	-	-
novel-m0128-3p	Unigene0045875	-	589	4.5	2	0.012	4	2	PREDICTED: heavy metal-associated isoprenylated plant protein 3-like [Nelumbo nucifera]	-	-	-
novel-m0128-3p	Unigene0043409	-	195	4.5	2	0.012	3	3	--	-	-	-
novel-m0128-3p	Unigene0108390	Syncrip	2022	4.5	2	0.012	25	25	PREDICTED: heterogeneous nuclear ribonucleoprotein Q-like [Elaeis guineensis]	-	-	-
novel-m0128-3p	Unigene0042746	-	862	3.5	2	0.012	11	11	PREDICTED: myeloid leukemia factor 1-like [Phoenix dactylifera]	-	-	-
novel-m0128-3p	Unigene0064998	Os05g0125500	2108	4.5	2	0.012	3	3	PREDICTED: isovaleryl-CoA dehydrogenase, mitochondrial [Oryza sativa Japonica Group]	-	GO:0036094//small molecule binding;GO:0003824//catalytic activity;GO:0016491//oxidoreductase activity;GO:1901265//nucleoside phosphate binding;GO:0097159//organic cyclic compound binding;GO:1901363//heterocyclic compound binding;GO:0000166//nucleotide binding;GO:0005488//binding	GO:0044710//single-organism metabolic process;GO:0044699//single-organism process;GO:0008152//metabolic process
novel-m0128-3p	Unigene0078992	NET1A	819	4.5	2	0.012	3	3	PREDICTED: protein NETWORKED 1D isoform X2 [Nelumbo nucifera]	-	-	-
novel-m0128-3p	Unigene0049990	PCMP-H58	679	4	2	0.012	3	3	PREDICTED: pentatricopeptide repeat-containing protein At5g50390, chloroplastic [Vitis vinifera]	-	-	-
novel-m0128-3p	Unigene0045692	-	304	4.5	2	0.012	3	3	hypothetical protein CFOL_v3_14229 [Cephalotus follicularis]	-	-	-
novel-m0128-3p	Unigene0026938	SPAC56F8.03	3356	4.5	2	0.012	10	5	PREDICTED: eukaryotic translation initiation factor 5B-like [Nelumbo nucifera]	-	GO:0097159//organic cyclic compound binding;GO:0005488//binding;GO:1901363//heterocyclic compound binding	-
novel-m0128-3p	Unigene0091991	At4g32390	891	4.5	2	0.012	11	11	PREDICTED: probable sugar phosphate/phosphate translocator At5g25400 [Nelumbo nucifera]	GO:0016020//membrane;GO:0044425//membrane part;GO:0031224//intrinsic component of membrane	-	-
novel-m0128-3p	Unigene0104599	-	411	4.5	2	0.012	2	2	PREDICTED: protein PXR1-like [Populus euphratica]	-	-	-
novel-m0128-3p	Unigene0010327	-	754	4.5	2	0.012	2	2	WRC domain-containing protein [Cephalotus follicularis]	-	-	-
novel-m0128-3p	Unigene0047960	-	463	4	2	0.012	6	6	PREDICTED: atherin [Eucalyptus grandis]	-	-	-
novel-m0128-3p	Unigene0056201	-	17	4	2	0.012	2	2	PREDICTED: LDLR chaperone MESD [Vitis vinifera]	-	-	-
novel-m0128-3p	Unigene0003579	-	126	4.5	2	0.012	3	3	--	-	-	-
novel-m0128-3p	Unigene0083885	FAO4A	147	4.5	2	0.012	2	1	PREDICTED: long-chain-alcohol oxidase FAO4A-like [Vitis vinifera]	-	-	-
novel-m0128-3p	Unigene0026937	SPAC56F8.03	2081	4.5	2	0.012	10	5	PREDICTED: eukaryotic translation initiation factor 5B-like [Nelumbo nucifera]	-	-	-
novel-m0128-3p	Unigene0065748	B120	1154	4	2	0.012	3	3	PREDICTED: G-type lectin S-receptor-like serine/threonine-protein kinase B120 [Nelumbo nucifera]	-	GO:0003824//catalytic activity;GO:0016772//transferase activity, transferring phosphorus-containing groups;GO:0016740//transferase activity;GO:0016301//kinase activity	GO:0009987//cellular process
novel-m0128-3p	Unigene0032274	EML3	2614	4	2	0.012	3	1.5	PREDICTED: protein EMSY-LIKE 3 isoform X1 [Nelumbo nucifera]	-	-	-
novel-m0128-3p	Unigene0083887	FAO4A	147	4.5	2	0.012	2	1	long-chain-alcohol oxidase FAO4A-like [Cajanus cajan]	-	GO:0003824//catalytic activity;GO:0016491//oxidoreductase activity	-
novel-m0182-5p	Unigene0049385	CYP80B2	781	4.5	2	0	6	6	PREDICTED: probable (S)-N-methylcoclaurine 3'-hydroxylase isozyme 2 [Populus euphratica]	-	GO:0016705//oxidoreductase activity, acting on paired donors, with incorporation or reduction of molecular oxygen;GO:0016491//oxidoreductase activity;GO:0043167//ion binding;GO:0005488//binding;GO:0003824//catalytic activity;GO:0046872//metal ion binding;GO:0043169//cation binding	-
novel-m0186-3p	Unigene0036633	frr	872	4.5	2	0.002	3	3	RRF domain-containing protein [Cephalotus follicularis]	-	-	-
novel-m0186-3p	Unigene0067660	APC1	5108	4.5	2	0.002	2	2	PREDICTED: anaphase-promoting complex subunit 1 [Nelumbo nucifera]	-	-	-
novel-m0186-3p	Unigene0007710	-	634	4.5	2	0	2	2	PREDICTED: uncharacterized protein LOC103709624 [Phoenix dactylifera]	-	-	-
novel-m0186-3p	Unigene0001026	RNU1	228	4	2	0	5	2.5	PREDICTED: U1 small nuclear ribonucleoprotein 70 kDa-like [Nelumbo nucifera]	-	-	-
novel-m0186-3p	Unigene0081595	TMCO4	555	3.5	2	0.002	9	9	Transmembrane and coiled-coil domain-containing protein 4 [Ananas comosus]	-	-	-
novel-m0186-3p	Unigene0080412	CPR	1168	4	2	0.002	13	13	PREDICTED: NADPH--cytochrome P450 reductase-like [Phoenix dactylifera]	GO:0044422//organelle part;GO:0043231//intracellular membrane-bounded organelle;GO:0005623//cell;GO:0005622//intracellular;GO:0043229//intracellular organelle;GO:0044464//cell part;GO:0043226//organelle;GO:0043227//membrane-bounded organelle;GO:0044424//intracellular part;GO:0016020//membrane;GO:0031090//organelle membrane	GO:0000166//nucleotide binding;GO:0003824//catalytic activity;GO:0043169//cation binding;GO:0046914//transition metal ion binding;GO:0005488//binding;GO:0046872//metal ion binding;GO:0097159//organic cyclic compound binding;GO:0097367//carbohydrate derivative binding;GO:1901363//heterocyclic compound binding;GO:1901265//nucleoside phosphate binding;GO:0036094//small molecule binding;GO:0032553//r…	GO:0044710//single-organism metabolic process;GO:0008152//metabolic process;GO:0044699//single-organism process
novel-m0186-3p	Unigene0043147	RNU1	228	4	2	0.002	5	2.5	PREDICTED: U1 small nuclear ribonucleoprotein 70 kDa-like [Nelumbo nucifera]	-	-	-
novel-m0186-3p	Unigene0065841	GBA2	3658	4.5	2	0.002	2	2	non-lysosomal glucosylceramidase [Ananas comosus]	GO:0044425//membrane part;GO:0031224//intrinsic component of membrane;GO:0016020//membrane	GO:0004553//hydrolase activity, hydrolyzing O-glycosyl compounds;GO:0016798//hydrolase activity, acting on glycosyl bonds;GO:0016787//hydrolase activity;GO:0003824//catalytic activity	GO:0044763//single-organism cellular process;GO:0044699//single-organism process;GO:0008152//metabolic process;GO:0044255//cellular lipid metabolic process;GO:0071704//organic substance metabolic process;GO:0044237//cellular metabolic process;GO:0044238//primary metabolic process;GO:0009987//cellular process;GO:0044710//single-organism metabolic process;GO:0006629//lipid metabolic process;GO:0006…
novel-m0186-3p	Unigene0061504	PF13_0198	3466	4.5	2	0.002	2	2	PREDICTED: homeobox-DDT domain protein RLT2 isoform X2 [Nelumbo nucifera]	-	-	-
novel-m0186-3p	Unigene0071026	HXK1	655	4.5	2	0.002	4	4	hexokinase [Citrus sinensis]	-	GO:0036094//small molecule binding;GO:0097367//carbohydrate derivative binding;GO:0001882//nucleoside binding;GO:0003824//catalytic activity;GO:0016773//phosphotransferase activity, alcohol group as acceptor;GO:1901363//heterocyclic compound binding;GO:0016772//transferase activity, transferring phosphorus-containing groups;GO:0001883//purine nucleoside binding;GO:0016740//transferase activity;GO…	GO:0019752//carboxylic acid metabolic process;GO:0044763//single-organism cellular process;GO:0043436//oxoacid metabolic process;GO:0006090//pyruvate metabolic process;GO:0006793//phosphorus metabolic process;GO:0008152//metabolic process;GO:0071704//organic substance metabolic process;GO:0044238//primary metabolic process;GO:0044281//small molecule metabolic process;GO:0044237//cellular metaboli…
novel-m0213-5p	Unigene0113751	PME51	839	4.5	2	0.002	2	2	pectinesterase/pectinesterase inhibitor [Medicago truncatula]	GO:0030312//external encapsulating structure;GO:0071944//cell periphery;GO:0005623//cell;GO:0044464//cell part	GO:0052689//carboxylic ester hydrolase activity;GO:0003824//catalytic activity;GO:0016787//hydrolase activity;GO:0016788//hydrolase activity, acting on ester bonds	GO:0071554//cell wall organization or biogenesis;GO:0009987//cellular process;GO:0008152//metabolic process;GO:0045229//external encapsulating structure organization;GO:0044238//primary metabolic process;GO:0016043//cellular component organization;GO:0009892//negative regulation of metabolic process;GO:0071840//cellular component organization or biogenesis;GO:0071555//cell wall organization;GO:00…
novel-m0213-5p	Unigene0059298	-	382	4	0	0	9	9	PREDICTED: uncharacterized protein LOC103336100 [Prunus mume]	-	-	-
novel-m0213-5p	Unigene0023504	-	600	4	2	0.002	3	3	PREDICTED: PRKR-interacting protein 1 homolog [Oryza brachyantha]	-	-	-
novel-m0213-5p	Unigene0097114	RPL3A	494	4.5	2	0.002	2	2	PREDICTED: 50S ribosomal protein L3, chloroplastic [Nelumbo nucifera]	GO:0044464//cell part;GO:1990904//ribonucleoprotein complex;GO:0032991//macromolecular complex;GO:0005622//intracellular;GO:0044424//intracellular part;GO:0030529//intracellular ribonucleoprotein complex;GO:0005623//cell	-	GO:0071704//organic substance metabolic process;GO:0043170//macromolecule metabolic process;GO:0008152//metabolic process;GO:0010467//gene expression
novel-m0213-5p	Unigene0063371	At2g44130	508	4	2	0.002	4	4	PREDICTED: F-box/kelch-repeat protein At2g44130-like isoform X2 [Nelumbo nucifera]	-	-	-
novel-m0213-5p	Unigene0101038	-	186	3.5	2	0.002	10	10	--	-	-	-
novel-m0213-5p	Unigene0046830	FKBP15-1	496	3.5	2	0.002	6	3	PREDICTED: peptidyl-prolyl cis-trans isomerase FKBP15-1 [Vitis vinifera]	-	-	-
novel-m0213-5p	Unigene0046159	KRP5	245	4	2	0.002	3	3	PREDICTED: cyclin-dependent kinase inhibitor 1-like [Nelumbo nucifera]	-	-	GO:0009987//cellular process
novel-m0213-5p	Unigene0052436	TIR1	57	3.5	1	0	2	2	PREDICTED: protein TRANSPORT INHIBITOR RESPONSE 1-like [Nelumbo nucifera]	-	-	GO:0009719//response to endogenous stimulus;GO:0009755//hormone-mediated signaling pathway;GO:0007165//signal transduction;GO:0050789//regulation of biological process;GO:0070887//cellular response to chemical stimulus;GO:0042221//response to chemical;GO:0009725//response to hormone;GO:0007154//cell communication;GO:0044763//single-organism cellular process;GO:0051716//cellular response to stimul…
novel-m0213-5p	Unigene0047567	Vps8	4088	4.5	2	0.002	2	2	PREDICTED: vacuolar protein sorting-associated protein 8 homolog isoform X2 [Nelumbo nucifera]	-	GO:0043167//ion binding;GO:0005488//binding;GO:0043169//cation binding;GO:0046872//metal ion binding	-
novel-m0213-5p	Unigene0104114	DER2.2	515	4.5	2	0.002	3	3	Derlin [Corchorus olitorius]	-	-	-
novel-m0213-5p	Unigene0046657	EAF1A	1237	4	2	0.002	2	2	PREDICTED: chromatin modification-related protein EAF1 B-like isoform X1 [Nelumbo nucifera]	-	-	-
novel-m0213-5p	Unigene0049507	SPL15	3794	3.5	2	0.002	3	3	PREDICTED: squamosa promoter-binding-like protein 14 [Nelumbo nucifera]	-	-	-
novel-m0213-5p	Unigene0063877	-	494	4.5	2	0.002	2	2	--	-	-	-
novel-m0213-5p	Unigene0046831	FKBP15-1	624	3.5	2	0.002	6	3	PREDICTED: peptidyl-prolyl cis-trans isomerase FKBP15-1 [Vitis vinifera]	-	GO:0016859//cis-trans isomerase activity;GO:0003824//catalytic activity;GO:0016853//isomerase activity	GO:0044260//cellular macromolecule metabolic process;GO:0044237//cellular metabolic process;GO:0009987//cellular process;GO:0071704//organic substance metabolic process;GO:0044267//cellular protein metabolic process;GO:0019538//protein metabolic process;GO:0008152//metabolic process;GO:0043170//macromolecule metabolic process;GO:0044238//primary metabolic process
novel-m0213-5p	Unigene0010412	-	1671	4.5	2	0.002	2	1	cytochrome c biogenesis Fc (mitochondrion) [Oryza minuta]	-	-	-
novel-m0213-5p	Unigene0108489	GRC2	1135	4	2	0.002	14	14	glutathione reductase, cytosolic [Ananas comosus]	GO:0043231//intracellular membrane-bounded organelle;GO:0005622//intracellular;GO:0043226//organelle;GO:0005623//cell;GO:0043227//membrane-bounded organelle;GO:0043229//intracellular organelle;GO:0005737//cytoplasm;GO:0044444//cytoplasmic part;GO:0044424//intracellular part;GO:0042579//microbody;GO:0044464//cell part	GO:0097159//organic cyclic compound binding;GO:0016651//oxidoreductase activity, acting on NAD(P)H;GO:0003824//catalytic activity;GO:0046872//metal ion binding;GO:0043169//cation binding;GO:0016491//oxidoreductase activity;GO:0046914//transition metal ion binding;GO:0016722//oxidoreductase activity, oxidizing metal ions;GO:0043167//ion binding;GO:0016723//oxidoreductase activity, oxidizing metal …	GO:0019725//cellular homeostasis;GO:0061687//detoxification of inorganic compound;GO:0006790//sulfur compound metabolic process;GO:0065008//regulation of biological quality;GO:0008152//metabolic process;GO:0042592//homeostatic process;GO:0009636//response to toxic substance;GO:0044237//cellular metabolic process;GO:0009404//toxin metabolic process;GO:0044763//single-organism cellular process;GO:0…
novel-m0213-5p	Unigene0052231	DRT102	185	4.5	2	0.002	3	3	PREDICTED: DNA-damage-repair/toleration protein DRT102 [Nelumbo nucifera]	-	-	-
novel-m0213-5p	Unigene0048449	GLU	3784	4.5	2	0.002	4	4	PREDICTED: ferredoxin-dependent glutamate synthase, chloroplastic [Nelumbo nucifera]	-	GO:0003824//catalytic activity;GO:0016491//oxidoreductase activity;GO:0016638//oxidoreductase activity, acting on the CH-NH2 group of donors	GO:0008152//metabolic process;GO:0006536//glutamate metabolic process;GO:0043436//oxoacid metabolic process;GO:0044238//primary metabolic process;GO:0044710//single-organism metabolic process;GO:1901605//alpha-amino acid metabolic process;GO:0006082//organic acid metabolic process;GO:0006520//cellular amino acid metabolic process;GO:0006807//nitrogen compound metabolic process;GO:0019752//carboxy…
novel-m0213-5p	Unigene0068572	METK2	507	3.5	2	0.002	15	15	PREDICTED: S-adenosylmethionine synthase 2 [Eucalyptus grandis]	GO:0044424//intracellular part;GO:0005623//cell;GO:0005622//intracellular;GO:0044464//cell part	GO:0016740//transferase activity;GO:0003824//catalytic activity;GO:0097159//organic cyclic compound binding;GO:0032550//purine ribonucleoside binding;GO:0097367//carbohydrate derivative binding;GO:0016765//transferase activity, transferring alkyl or aryl (other than methyl) groups;GO:0036094//small molecule binding;GO:0005488//binding;GO:0001882//nucleoside binding;GO:0043169//cation binding;GO:1…	GO:0044249//cellular biosynthetic process;GO:0009108//coenzyme biosynthetic process;GO:0051188//cofactor biosynthetic process;GO:0009058//biosynthetic process;GO:0044237//cellular metabolic process;GO:0006732//coenzyme metabolic process;GO:0051186//cofactor metabolic process;GO:0008152//metabolic process;GO:0009987//cellular process
novel-m0213-5p	Unigene0058474	SKIP5	1593	4.5	2	0.002	3	3	PREDICTED: F-box protein SKIP5 isoform X3 [Vitis vinifera]	-	-	-
novel-m0213-5p	Unigene0063317	SWI3A	855	4.5	2	0.002	2	2	PREDICTED: SWI/SNF complex subunit SWI3A isoform X2 [Vitis vinifera]	-	-	-
novel-m0213-5p	Unigene0060927	RPL18B	165	4	2	0.002	7	7	PREDICTED: 60S ribosomal protein L18-2 [Vitis vinifera]	GO:0044464//cell part;GO:0032991//macromolecular complex;GO:0005622//intracellular;GO:1990904//ribonucleoprotein complex;GO:0044424//intracellular part;GO:0005623//cell;GO:0030529//intracellular ribonucleoprotein complex	-	GO:0071704//organic substance metabolic process;GO:0008152//metabolic process;GO:0043170//macromolecule metabolic process;GO:0010467//gene expression
novel-m0213-5p	Unigene0068573	SAMS2	354	0	2	0.002	14	14	PREDICTED: S-adenosylmethionine synthase 2 [Gossypium raimondii]	GO:0044424//intracellular part;GO:0005623//cell;GO:0044464//cell part;GO:0005622//intracellular	GO:0097367//carbohydrate derivative binding;GO:0043167//ion binding;GO:0043169//cation binding;GO:0001882//nucleoside binding;GO:0016740//transferase activity;GO:0001883//purine nucleoside binding;GO:0097159//organic cyclic compound binding;GO:0032550//purine ribonucleoside binding;GO:0036094//small molecule binding;GO:0016765//transferase activity, transferring alkyl or aryl (other than methyl) …	GO:0044237//cellular metabolic process;GO:0006732//coenzyme metabolic process;GO:0009987//cellular process;GO:0051186//cofactor metabolic process;GO:0008152//metabolic process;GO:0009058//biosynthetic process;GO:0044249//cellular biosynthetic process;GO:0051188//cofactor biosynthetic process;GO:0009108//coenzyme biosynthetic process
novel-m0213-5p	Unigene0009293	At4g26390	855	4	2	0.002	2	2	PREDICTED: pyruvate kinase 1, cytosolic-like [Phoenix dactylifera]	-	GO:0043169//cation binding;GO:0016301//kinase activity;GO:0043167//ion binding;GO:0031420//alkali metal ion binding;GO:0046872//metal ion binding;GO:0005488//binding;GO:0016740//transferase activity;GO:0016772//transferase activity, transferring phosphorus-containing groups;GO:0003824//catalytic activity	GO:0044699//single-organism process;GO:0044710//single-organism metabolic process;GO:0009987//cellular process;GO:0043436//oxoacid metabolic process;GO:0008152//metabolic process;GO:0071704//organic substance metabolic process;GO:0019752//carboxylic acid metabolic process;GO:0006082//organic acid metabolic process;GO:0044281//small molecule metabolic process;GO:0006793//phosphorus metabolic proce…
novel-m0213-5p	Unigene0059298	-	299	4.5	2	0.002	3	3	PREDICTED: uncharacterized protein LOC103336100 [Prunus mume]	-	-	-
novel-m0213-5p	Unigene0085551	Mon2	5024	4	2	0.002	2	2	PREDICTED: protein MON2 homolog isoform X2 [Nelumbo nucifera]	-	-	-
novel-m0213-5p	Unigene0003097	FLK	528	4.5	2	0.002	2	2	PREDICTED: LOW QUALITY PROTEIN: flowering locus K homology domain [Nelumbo nucifera]	-	-	-
novel-m0356-5p	Unigene0087888	DIT1	1008	4.5	2	0.002	3	3	PREDICTED: dicarboxylate transporter 1, chloroplastic [Phoenix dactylifera]	GO:0043231//intracellular membrane-bounded organelle;GO:0044422//organelle part;GO:0031975//envelope;GO:0009526//plastid envelope;GO:0044464//cell part;GO:0044444//cytoplasmic part;GO:0031976//plastid thylakoid;GO:0043229//intracellular organelle;GO:0009528//plastid inner membrane;GO:0031090//organelle membrane;GO:0044435//plastid part;GO:0009579//thylakoid;GO:0016020//membrane;GO:0031224//intrin…	GO:0022892//substrate-specific transporter activity;GO:0008514//organic anion transmembrane transporter activity;GO:0005310//dicarboxylic acid transmembrane transporter activity;GO:0046943//carboxylic acid transmembrane transporter activity;GO:0015075//ion transmembrane transporter activity;GO:0005215//transporter activity;GO:0022891//substrate-specific transmembrane transporter activity;GO:00053…	GO:1901605//alpha-amino acid metabolic process;GO:0006970//response to osmotic stress;GO:1901576//organic substance biosynthetic process;GO:0006082//organic acid metabolic process;GO:0015740//C4-dicarboxylate transport;GO:0071702//organic substance transport;GO:0006807//nitrogen compound metabolic process;GO:0044710//single-organism metabolic process;GO:0071554//cell wall organization or biogenes…
novel-m0356-5p	Unigene0096000	-	1072	4.5	2	0.002	4	4	PREDICTED: eukaryotic translation initiation factor 4B2-like [Nelumbo nucifera]	-	-	-
novel-m0356-5p	Unigene0086027	Rwdd1	876	4	2	0.002	2	2	PREDICTED: RWD domain-containing protein 1 isoform X2 [Nelumbo nucifera]	-	-	-
novel-m0356-5p	Unigene0054988	AAPT1	1959	4.5	2	0.002	2	0.666667	PREDICTED: choline/ethanolaminephosphotransferase 1 isoform X2 [Elaeis guineensis]	-	GO:0003824//catalytic activity;GO:0016740//transferase activity;GO:0016772//transferase activity, transferring phosphorus-containing groups	-
novel-m0356-5p	Unigene0065579	ncor1	1135	4.5	2	0.002	2	2	PREDICTED: uncharacterized protein LOC104594807 isoform X3 [Nelumbo nucifera]	-	-	-
novel-m0356-5p	Unigene0054987	AAPT1	1142	4.5	2	0.002	2	0.666667	PREDICTED: choline/ethanolaminephosphotransferase 1 [Ziziphus jujuba]	-	GO:0016740//transferase activity;GO:0003824//catalytic activity;GO:0016772//transferase activity, transferring phosphorus-containing groups	-
novel-m0356-5p	Unigene0072692	atg101	432	4.5	2	0.002	3	3	PREDICTED: autophagy-related protein 101-like isoform X1 [Nelumbo nucifera]	-	-	-
novel-m0356-5p	Unigene0063570	-	277	4.5	2	0.002	8	8	RanBP2-type zinc finger protein At1g67325 [Anthurium amnicola]	-	-	-
novel-m0356-5p	Unigene0059997	-	271	4.5	2	0.002	2	2	Ankyrin repeat domain-containing 34B [Gossypium arboreum]	-	-	-
novel-m0356-5p	Unigene0028106	DIM	1607	4	2	0.002	4	4	PREDICTED: delta(24)-sterol reductase [Nelumbo nucifera]	-	GO:0005488//binding;GO:0016614//oxidoreductase activity, acting on CH-OH group of donors;GO:0097159//organic cyclic compound binding;GO:1901363//heterocyclic compound binding;GO:0036094//small molecule binding;GO:0016616//oxidoreductase activity, acting on the CH-OH group of donors, NAD or NADP as acceptor;GO:1901265//nucleoside phosphate binding;GO:0003824//catalytic activity;GO:0016491//oxidore…	GO:0044710//single-organism metabolic process;GO:0044699//single-organism process;GO:0008152//metabolic process
novel-m0356-5p	Unigene0075441	wol	855	4.5	2	0.002	2	2	PREDICTED: dolichyl-phosphate beta-glucosyltransferase [Elaeis guineensis]	-	-	-
novel-m0356-5p	Unigene0053760	ASHR2	682	4	2	0.002	2	2	PREDICTED: histone-lysine N-methyltransferase ASHR2 [Phoenix dactylifera]	-	GO:0016740//transferase activity;GO:0003824//catalytic activity	-
novel-m0356-5p	Unigene0054989	AAPT1	1003	4.5	2	0.002	2	0.666667	PREDICTED: choline/ethanolaminephosphotransferase 1 isoform X2 [Elaeis guineensis]	-	GO:0016740//transferase activity;GO:0003824//catalytic activity;GO:0016772//transferase activity, transferring phosphorus-containing groups	-

## Sheet: target genes(855)
855 target genes from miRNA-target pairs of DEMs classified into Category 0, 1 and 2
mRNA	symbol	Nr-annotation	biological-process	cellular-component	molecular-function
Unigene0038922	At4g12780	PREDICTED: auxilin-related protein 2-like [Brachypodium distachyon]	-	-	-
Unigene0052327	fusA2	PREDICTED: elongation factor G-2, chloroplastic-like [Phoenix dactylifera]	GO:0044464//cell part;GO:0005623//cell	GO:1901363//heterocyclic compound binding;GO:0005488//binding;GO:0001882//nucleoside binding;GO:0016787//hydrolase activity;GO:0032549//ribonucleoside binding;GO:0032550//purine ribonucleoside binding;GO:0003824//catalytic activity;GO:0036094//small molecule binding;GO:0016462//pyrophosphatase activity;GO:0008135//translation factor activity, RNA binding;GO:0097367//carbohydrate derivative bindin…	GO:1901576//organic substance biosynthetic process;GO:0009058//biosynthetic process;GO:0043170//macromolecule metabolic process;GO:0034645//cellular macromolecule biosynthetic process;GO:0071704//organic substance metabolic process;GO:0009987//cellular process;GO:0044260//cellular macromolecule metabolic process;GO:0044249//cellular biosynthetic process;GO:0009059//macromolecule biosynthetic proc…
Unigene0093250	emc2-a	PREDICTED: ER membrane protein complex subunit 2-A [Elaeis guineensis]	-	GO:0003824//catalytic activity	-
Unigene0036496	-	hypothetical protein L484_009299 [Morus notabilis]	-	-	-
Unigene0065088	EFL4	PREDICTED: protein ELF4-LIKE 4-like [Nelumbo nucifera]	-	-	-
Unigene0098421	CYCU4-1	PREDICTED: cyclin-U4-1-like [Nelumbo nucifera]	-	GO:0019900//kinase binding;GO:0016772//transferase activity, transferring phosphorus-containing groups;GO:0005515//protein binding;GO:0005488//binding;GO:0019899//enzyme binding;GO:0003824//catalytic activity;GO:0016740//transferase activity	GO:0006793//phosphorus metabolic process;GO:0006796//phosphate-containing compound metabolic process;GO:0009987//cellular process;GO:0008152//metabolic process;GO:0044237//cellular metabolic process
Unigene0049886	RNFT1	PREDICTED: RING finger and transmembrane domain-containing protein 2 [Nelumbo nucifera]	-	-	-
Unigene0055068	SPBC23E6.02	PREDICTED: helicase-like transcription factor CHR28 [Vitis vinifera]	-	-	-
Unigene0043667	TIF3H1	PREDICTED: eukaryotic translation initiation factor 3 subunit H [Vitis vinifera]	GO:0005623//cell;GO:0043234//protein complex;GO:0005737//cytoplasm;GO:0044464//cell part;GO:0032991//macromolecular complex;GO:0030529//intracellular ribonucleoprotein complex;GO:0044424//intracellular part;GO:1990904//ribonucleoprotein complex;GO:0005622//intracellular;GO:0044444//cytoplasmic part;GO:0070993//translation preinitiation complex	-	GO:0050794//regulation of cellular process;GO:0036211//protein modification process;GO:0022607//cellular component assembly;GO:0080090//regulation of primary metabolic process;GO:0044237//cellular metabolic process;GO:0006417//regulation of translation;GO:0034622//cellular macromolecular complex assembly;GO:0050789//regulation of biological process;GO:0016043//cellular component organization;GO:0…
Unigene0011704	RH21	PREDICTED: DEAD-box ATP-dependent RNA helicase 21 [Vitis vinifera]	-	-	-
Unigene0009151	TIC	PREDICTED: protein TIME FOR COFFEE-like isoform X2 [Nelumbo nucifera]	-	-	-
Unigene0043885	ADH	PREDICTED: alcohol dehydrogenase 1-like [Nelumbo nucifera]	-	GO:0003824//catalytic activity;GO:0043167//ion binding;GO:0043169//cation binding;GO:0005488//binding	GO:0008152//metabolic process;GO:0044699//single-organism process;GO:0044710//single-organism metabolic process
Unigene0036497	-	hypothetical protein L484_009299 [Morus notabilis]	-	-	-
Unigene0087158	At4g19185	PREDICTED: WAT1-related protein At4g19185 isoform X1 [Nelumbo nucifera]	GO:0031224//intrinsic component of membrane;GO:0044425//membrane part;GO:0016020//membrane	GO:0005215//transporter activity	GO:0044699//single-organism process;GO:0009987//cellular process;GO:0044763//single-organism cellular process
Unigene0024914	-	Apurinic endonuclease-redox protein [Anthurium amnicola]	-	-	-
Unigene0068225	-	PREDICTED: uncharacterized protein LOC100266910 isoform X1 [Vitis vinifera]	-	-	-
Unigene0068226	-	PREDICTED: uncharacterized protein LOC100266910 isoform X1 [Vitis vinifera]	-	-	-
Unigene0039560	RPB2	PREDICTED: DNA-directed RNA polymerase II subunit RPB2 [Nelumbo nucifera]	GO:0044464//cell part;GO:0030054//cell junction;GO:0005634//nucleus;GO:0005911//cell-cell junction;GO:0044444//cytoplasmic part;GO:0044451//nucleoplasm part;GO:0043231//intracellular membrane-bounded organelle;GO:0044428//nuclear part;GO:0005622//intracellular;GO:0044422//organelle part;GO:0043233//organelle lumen;GO:0031981//nuclear lumen;GO:0070013//intracellular organelle lumen;GO:0005737//cyt…	GO:0097159//organic cyclic compound binding;GO:0005488//binding;GO:0034062//RNA polymerase activity;GO:0036094//small molecule binding;GO:1901363//heterocyclic compound binding;GO:0043167//ion binding;GO:0001882//nucleoside binding;GO:0003676//nucleic acid binding;GO:0003824//catalytic activity;GO:0043169//cation binding;GO:0016772//transferase activity, transferring phosphorus-containing groups;…	GO:1901360//organic cyclic compound metabolic process;GO:1901362//organic cyclic compound biosynthetic process;GO:0046700//heterocycle catabolic process;GO:0006725//cellular aromatic compound metabolic process;GO:0008152//metabolic process;GO:0034654//nucleobase-containing compound biosynthetic process;GO:0044249//cellular biosynthetic process;GO:0019439//aromatic compound catabolic process;GO:00…
Unigene0057961	-	DnaJ subfamily C member 22 [Theobroma cacao]	-	-	-
Unigene0043884	ADH	PREDICTED: alcohol dehydrogenase 1-like [Nelumbo nucifera]	-	GO:0005488//binding;GO:0003824//catalytic activity;GO:0043167//ion binding;GO:0043169//cation binding	GO:0044710//single-organism metabolic process;GO:0044699//single-organism process;GO:0008152//metabolic process
Unigene0055959	ISPG	PREDICTED: 4-hydroxy-3-methylbut-2-en-1-yl diphosphate synthase (ferredoxin), chloroplastic [Nelumbo nucifera]	GO:0005737//cytoplasm;GO:0044422//organelle part;GO:0044446//intracellular organelle part;GO:0009536//plastid;GO:0043227//membrane-bounded organelle;GO:0009532//plastid stroma;GO:0044464//cell part;GO:0005623//cell;GO:0009526//plastid envelope;GO:0044424//intracellular part;GO:0031967//organelle envelope;GO:0043226//organelle;GO:0044444//cytoplasmic part;GO:0043229//intracellular organelle;GO:000…	GO:0051536//iron-sulfur cluster binding;GO:0043169//cation binding;GO:0016725//oxidoreductase activity, acting on CH or CH2 groups;GO:0016491//oxidoreductase activity;GO:0043167//ion binding;GO:0052592//oxidoreductase activity, acting on CH or CH2 groups, with an iron-sulfur protein as acceptor;GO:0051540//metal cluster binding;GO:0003824//catalytic activity;GO:0005488//binding;GO:0046914//transi…	GO:2000112//regulation of cellular macromolecule biosynthetic process;GO:0002376//immune system process;GO:0044237//cellular metabolic process;GO:0009639//response to red or far red light;GO:0010468//regulation of gene expression;GO:0001101//response to acid chemical;GO:0006082//organic acid metabolic process;GO:0006996//organelle organization;GO:0016114//terpenoid biosynthetic process;GO:0006629…
Unigene0050961	PHL1	Myb_DNA-binding domain-containing protein/Myb_CC_LHEQLE domain-containing protein [Cephalotus follicularis]	-	-	-
Unigene0007647	PCKA	PREDICTED: phosphoenolpyruvate carboxykinase [ATP]-like [Juglans regia]	-	-	-
Unigene0057796	STR6	PREDICTED: rhodanese-like domain-containing protein 6 [Nelumbo nucifera]	-	-	-
Unigene0066407	-	E3 ubiquitin-protein ligase bre1-like isoform X2 [Asparagus officinalis]	-	-	-
Unigene0069750	MPK10	Mitogen-activated protein kinase 10 [Anthurium amnicola]	-	GO:0001883//purine nucleoside binding;GO:0016740//transferase activity;GO:0003824//catalytic activity;GO:1901363//heterocyclic compound binding;GO:0097367//carbohydrate derivative binding;GO:0032550//purine ribonucleoside binding;GO:0004871//signal transducer activity;GO:0016301//kinase activity;GO:0032549//ribonucleoside binding;GO:0004674//protein serine/threonine kinase activity;GO:0005057//re…	GO:0043170//macromolecule metabolic process;GO:0050793//regulation of developmental process;GO:0006796//phosphate-containing compound metabolic process;GO:0071840//cellular component organization or biogenesis;GO:0048509//regulation of meristem development;GO:0036211//protein modification process;GO:0050789//regulation of biological process;GO:0044085//cellular component biogenesis;GO:0051239//re…
Unigene0039985	At5g13110	PREDICTED: glucose-6-phosphate 1-dehydrogenase, chloroplastic [Elaeis guineensis]	-	GO:0003824//catalytic activity;GO:0005488//binding;GO:0097159//organic cyclic compound binding;GO:0000166//nucleotide binding;GO:1901363//heterocyclic compound binding;GO:0036094//small molecule binding;GO:1901265//nucleoside phosphate binding	GO:0071704//organic substance metabolic process;GO:0008152//metabolic process;GO:0044699//single-organism process;GO:0019318//hexose metabolic process;GO:0044710//single-organism metabolic process;GO:0044723//single-organism carbohydrate metabolic process;GO:0044281//small molecule metabolic process;GO:0005975//carbohydrate metabolic process;GO:0005996//monosaccharide metabolic process;GO:0044238…
Unigene0025760	Marf1	PREDICTED: meiosis arrest female protein 1 homolog [Prunus mume]	-	-	-
Unigene0053647	IQD1	PREDICTED: protein IQ-DOMAIN 1 isoform X1 [Nelumbo nucifera]	-	-	-
Unigene0001904	BLH2	PREDICTED: BEL1-like homeodomain protein 4 [Nelumbo nucifera]	-	-	-
Unigene0083702	CCR1	Bifunctional dihydroflavonol 4-reductase/flavanone 4-reductase [Morus notabilis]	-	GO:0048037//cofactor binding;GO:0005488//binding	-
Unigene0066406	-	E3 ubiquitin-protein ligase bre1-like isoform X2 [Asparagus officinalis]	-	-	-
Unigene0039558	RPB2	PREDICTED: DNA-directed RNA polymerase II subunit RPB2 [Nelumbo nucifera]	-	GO:0097159//organic cyclic compound binding;GO:1901363//heterocyclic compound binding;GO:0016779//nucleotidyltransferase activity;GO:0016740//transferase activity;GO:0097367//carbohydrate derivative binding;GO:0034062//RNA polymerase activity;GO:0016772//transferase activity, transferring phosphorus-containing groups;GO:0005488//binding;GO:0036094//small molecule binding;GO:0003824//catalytic act…	GO:0071704//organic substance metabolic process;GO:0044260//cellular macromolecule metabolic process;GO:0009987//cellular process;GO:0043170//macromolecule metabolic process;GO:0009059//macromolecule biosynthetic process;GO:0008152//metabolic process;GO:1901576//organic substance biosynthetic process;GO:0034645//cellular macromolecule biosynthetic process;GO:0044249//cellular biosynthetic process…
Unigene0075391	CER1	PREDICTED: protein ECERIFERUM 1-like [Nelumbo nucifera]	-	-	-
Unigene0079231	MIRO1	PREDICTED: mitochondrial Rho GTPase 1-like isoform X1 [Phoenix dactylifera]	-	-	-
Unigene0087918	-	--	-	-	-
Unigene0002645	SPBC23E6.02	PREDICTED: helicase-like transcription factor CHR28 [Juglans regia]	-	-	-
Unigene0066152	EMB1674	PREDICTED: protein EMBRYO DEFECTIVE 1674-like isoform X1 [Prunus mume]	-	-	-
Unigene0050959	PHL1	PREDICTED: myb family transcription factor PHL7 isoform X1 [Vitis vinifera]	-	-	GO:0043170//macromolecule metabolic process;GO:0051179//localization;GO:0051641//cellular localization;GO:0044249//cellular biosynthetic process;GO:0051234//establishment of localization;GO:0044763//single-organism cellular process;GO:0071704//organic substance metabolic process;GO:0009058//biosynthetic process;GO:0044699//single-organism process;GO:0034645//cellular macromolecule biosynthetic pr…
Unigene0042826	DCAF1	PREDICTED: DDB1- and CUL4-associated factor homolog 1 [Nelumbo nucifera]	-	-	-
Unigene0068229	-	PREDICTED: uncharacterized protein LOC100266910 isoform X1 [Vitis vinifera]	-	-	-
Unigene0108202	-	PREDICTED: arabinosyltransferase XEG113 isoform X1 [Nelumbo nucifera]	-	-	-
Unigene0076139	CER1	protein ECERIFERUM 1-like [Ananas comosus]	GO:0016020//membrane;GO:0031224//intrinsic component of membrane;GO:0044425//membrane part	GO:0003824//catalytic activity	GO:0032787//monocarboxylic acid metabolic process;GO:0006631//fatty acid metabolic process;GO:0009987//cellular process;GO:0044710//single-organism metabolic process;GO:0008152//metabolic process;GO:0044255//cellular lipid metabolic process;GO:0044699//single-organism process;GO:0043436//oxoacid metabolic process;GO:0006629//lipid metabolic process;GO:0044238//primary metabolic process;GO:0044237…
Unigene0033858	WRKY11	PREDICTED: probable WRKY transcription factor 17 [Nelumbo nucifera]	-	GO:1901363//heterocyclic compound binding;GO:0003677//DNA binding;GO:0097159//organic cyclic compound binding;GO:0003676//nucleic acid binding;GO:0005488//binding	GO:0019222//regulation of metabolic process;GO:0065007//biological regulation;GO:0060255//regulation of macromolecule metabolic process;GO:0050789//regulation of biological process;GO:0010468//regulation of gene expression
Unigene0079229	MIRO1	PREDICTED: mitochondrial Rho GTPase 1 [Phoenix dactylifera]	-	-	-
Unigene0010426	SUPT6H	PREDICTED: transcription elongation factor SPT6 homolog [Nelumbo nucifera]	-	-	GO:0051252//regulation of RNA metabolic process;GO:0019219//regulation of nucleobase-containing compound metabolic process;GO:0031326//regulation of cellular biosynthetic process;GO:2001141//regulation of RNA biosynthetic process;GO:0019222//regulation of metabolic process;GO:0050794//regulation of cellular process;GO:0065007//biological regulation;GO:0009889//regulation of biosynthetic process;G…
Unigene0113338	CBSX3	PREDICTED: CBS domain-containing protein CBSX3, mitochondrial-like [Nelumbo nucifera]	-	GO:1901265//nucleoside phosphate binding;GO:0043167//ion binding;GO:0046872//metal ion binding;GO:0005488//binding;GO:0046914//transition metal ion binding;GO:0000166//nucleotide binding;GO:0097159//organic cyclic compound binding;GO:0036094//small molecule binding;GO:0017076//purine nucleotide binding;GO:0043169//cation binding;GO:1901363//heterocyclic compound binding	GO:0016043//cellular component organization;GO:0008152//metabolic process;GO:0009987//cellular process;GO:0006082//organic acid metabolic process;GO:0006950//response to stress;GO:0071704//organic substance metabolic process;GO:0051179//localization;GO:0006810//transport;GO:0019725//cellular homeostasis;GO:0006970//response to osmotic stress;GO:0044281//small molecule metabolic process;GO:0044237…
Unigene0082948	LIP5	PREDICTED: protein HOMOLOG OF MAMMALIAN LYST-INTERACTING PROTEIN 5 [Elaeis guineensis]	-	-	-
Unigene0111776	Os08g0118900	PREDICTED: probable adenylate kinase 7, mitochondrial [Phoenix dactylifera]	-	-	-
Unigene0062071	PALD1	PREDICTED: paladin isoform X2 [Nelumbo nucifera]	-	-	-
Unigene0076706	RHM1	PREDICTED: trifunctional UDP-glucose 4,6-dehydratase/UDP-4-keto-6-deoxy-D-glucose 3,5-epimerase/UDP-4-keto-L-rhamnose-reductase RHM1 [Nelumbo nucifera]	-	GO:0016836//hydro-lyase activity;GO:0005488//binding;GO:0016829//lyase activity;GO:0003824//catalytic activity;GO:0048037//cofactor binding;GO:0016835//carbon-oxygen lyase activity	GO:0006139//nucleobase-containing compound metabolic process;GO:0006796//phosphate-containing compound metabolic process;GO:0009117//nucleotide metabolic process;GO:0019637//organophosphate metabolic process;GO:0044699//single-organism process;GO:0044710//single-organism metabolic process;GO:0006807//nitrogen compound metabolic process;GO:0044238//primary metabolic process;GO:0044237//cellular me…
Unigene0068581	At1g04910	DUF246 domain-containing protein At1g04910 [Anthurium amnicola]	-	-	-
Unigene0071211	NPF8.3	PREDICTED: protein NRT1/ PTR FAMILY 8.3-like [Phoenix dactylifera]	GO:0016020//membrane;GO:0044425//membrane part;GO:0031224//intrinsic component of membrane	-	GO:0071705//nitrogen compound transport;GO:0042886//amide transport;GO:0071702//organic substance transport;GO:1902578//single-organism localization;GO:0044765//single-organism transport;GO:0051179//localization;GO:0015833//peptide transport;GO:0006810//transport;GO:0051234//establishment of localization;GO:0044699//single-organism process
Unigene0031702	-	Phox/Bem1p [Corchorus capsularis]	-	-	-
Unigene0054827	DDB_G0276461	PREDICTED: probable serine/threonine-protein kinase DDB_G0280111 isoform X2 [Nelumbo nucifera]	-	-	-
Unigene0054828	AAK1	PREDICTED: probable serine/threonine-protein kinase DDB_G0280111 isoform X2 [Nelumbo nucifera]	-	GO:0016772//transferase activity, transferring phosphorus-containing groups;GO:0003824//catalytic activity;GO:0016740//transferase activity	-
Unigene0037500	WRKY4	PREDICTED: probable WRKY transcription factor 4 isoform X1 [Phoenix dactylifera]	-	-	-
Unigene0051576	NFS2	PREDICTED: cysteine desulfurase 1, chloroplastic isoform X2 [Vigna angularis]	-	GO:0016829//lyase activity;GO:0003824//catalytic activity;GO:0016740//transferase activity;GO:0005488//binding;GO:0043167//ion binding;GO:0043168//anion binding;GO:0016782//transferase activity, transferring sulfur-containing groups;GO:0016783//sulfurtransferase activity;GO:0016846//carbon-sulfur lyase activity	GO:0043436//oxoacid metabolic process;GO:0006807//nitrogen compound metabolic process;GO:0044699//single-organism process;GO:0000096//sulfur amino acid metabolic process;GO:1901564//organonitrogen compound metabolic process;GO:0044237//cellular metabolic process;GO:0008152//metabolic process;GO:0019752//carboxylic acid metabolic process;GO:0044238//primary metabolic process;GO:0044763//single-org…
Unigene0008517	TIM44-2	PREDICTED: mitochondrial import inner membrane translocase subunit TIM44-2 [Nelumbo nucifera]	-	-	-
Unigene0057083	SIR1	PREDICTED: sulfite reductase [ferredoxin], chloroplastic-like [Nelumbo nucifera]	-	GO:0016667//oxidoreductase activity, acting on a sulfur group of donors;GO:0016673//oxidoreductase activity, acting on a sulfur group of donors, iron-sulfur protein as acceptor;GO:1901363//heterocyclic compound binding;GO:0016491//oxidoreductase activity;GO:0005488//binding;GO:0051540//metal cluster binding;GO:0097159//organic cyclic compound binding;GO:0051536//iron-sulfur cluster binding;GO:000…	GO:0044710//single-organism metabolic process;GO:0044699//single-organism process;GO:0008152//metabolic process
Unigene0048660	OVA9	PREDICTED: glutamine--tRNA ligase [Nelumbo nucifera]	GO:0005623//cell;GO:0044424//intracellular part;GO:0005622//intracellular;GO:0044464//cell part	GO:0016874//ligase activity;GO:0004812//aminoacyl-tRNA ligase activity;GO:0016875//ligase activity, forming carbon-oxygen bonds;GO:0003824//catalytic activity;GO:0097367//carbohydrate derivative binding;GO:0097159//organic cyclic compound binding;GO:0032550//purine ribonucleoside binding;GO:0001883//purine nucleoside binding;GO:0005488//binding;GO:0016876//ligase activity, forming aminoacyl-tRNA …	GO:0019752//carboxylic acid metabolic process;GO:0043039//tRNA aminoacylation;GO:0044710//single-organism metabolic process;GO:0006518//peptide metabolic process;GO:0006399//tRNA metabolic process;GO:0006082//organic acid metabolic process;GO:0043038//amino acid activation;GO:0044238//primary metabolic process;GO:0009987//cellular process;GO:1901564//organonitrogen compound metabolic process;GO:0…
Unigene0086918	At5g01460	PREDICTED: LIMR family protein At5g01460 [Citrus sinensis]	GO:0016020//membrane;GO:0044425//membrane part;GO:0031224//intrinsic component of membrane	-	-
Unigene0027030	VPS13A	PREDICTED: uncharacterized protein LOC105035160 isoform X1 [Elaeis guineensis]	-	-	-
Unigene0051575	NFS2	PREDICTED: cysteine desulfurase 1, chloroplastic [Nelumbo nucifera]	GO:0009536//plastid;GO:0044444//cytoplasmic part;GO:0043227//membrane-bounded organelle;GO:0005623//cell;GO:0043231//intracellular membrane-bounded organelle;GO:0043226//organelle;GO:0005737//cytoplasm;GO:0005622//intracellular;GO:0043229//intracellular organelle;GO:0044424//intracellular part;GO:0044464//cell part	GO:0016783//sulfurtransferase activity;GO:0016829//lyase activity;GO:0016740//transferase activity;GO:0016846//carbon-sulfur lyase activity;GO:0043167//ion binding;GO:0016782//transferase activity, transferring sulfur-containing groups;GO:0005488//binding;GO:0043168//anion binding;GO:0003824//catalytic activity	GO:0006790//sulfur compound metabolic process;GO:0055080//cation homeostasis;GO:1901566//organonitrogen compound biosynthetic process;GO:0044699//single-organism process;GO:0006082//organic acid metabolic process;GO:0009058//biosynthetic process;GO:0000096//sulfur amino acid metabolic process;GO:0016043//cellular component organization;GO:1901576//organic substance biosynthetic process;GO:0044237…
Unigene0081395	At1g43190	PREDICTED: polypyrimidine tract-binding protein homolog 3-like isoform X2 [Nelumbo nucifera]	-	-	-
Unigene0037499	WRKY4	PREDICTED: probable WRKY transcription factor 4 isoform X1 [Phoenix dactylifera]	-	-	-
Unigene0086914	At5g01460	PREDICTED: LIMR family protein At5g01460-like [Camelina sativa]	GO:0044425//membrane part;GO:0016020//membrane;GO:0031224//intrinsic component of membrane	-	-
Unigene0032082	GA15091	PREDICTED: protein GDAP2 homolog [Phoenix dactylifera]	-	-	-
Unigene0062176	XBAT33	PREDICTED: E3 ubiquitin-protein ligase XBAT33 isoform X1 [Vitis vinifera]	-	GO:0043167//ion binding;GO:0005488//binding;GO:0003824//catalytic activity;GO:0019787//ubiquitin-like protein transferase activity;GO:0016740//transferase activity;GO:0043169//cation binding	GO:0036211//protein modification process;GO:0044267//cellular protein metabolic process;GO:0019538//protein metabolic process;GO:0032446//protein modification by small protein conjugation;GO:0044238//primary metabolic process;GO:0043170//macromolecule metabolic process;GO:0044237//cellular metabolic process;GO:0044260//cellular macromolecule metabolic process;GO:0006464//cellular protein modifica…
Unigene0012924	AP2M	PREDICTED: AP-2 complex subunit mu [Amborella trichopoda]	GO:0044444//cytoplasmic part;GO:0005622//intracellular;GO:0030117//membrane coat;GO:0032991//macromolecular complex;GO:0005737//cytoplasm;GO:0005623//cell;GO:0016020//membrane;GO:0044424//intracellular part;GO:0043234//protein complex;GO:0044464//cell part;GO:0048475//coated membrane;GO:0044425//membrane part;GO:0098796//membrane protein complex;GO:0030119//AP-type membrane coat adaptor complex	GO:0005488//binding;GO:0043167//ion binding;GO:0043168//anion binding	GO:0006810//transport;GO:0008104//protein localization;GO:0008152//metabolic process;GO:0071702//organic substance transport;GO:0051179//localization;GO:0015031//protein transport;GO:0033036//macromolecule localization;GO:0051234//establishment of localization;GO:0045184//establishment of protein localization
Unigene0059020	RPS15AA	PREDICTED: 40S ribosomal protein S15a-1 [Arachis duranensis]	-	-	-
Unigene0061442	VTC5	GDP-L-galactose phosphorylase [Actinidia eriantha]	-	GO:0016758//transferase activity, transferring hexosyl groups;GO:0016772//transferase activity, transferring phosphorus-containing groups;GO:0016757//transferase activity, transferring glycosyl groups;GO:0016740//transferase activity;GO:0003824//catalytic activity;GO:0004645//phosphorylase activity	-
Unigene0024618	At2g44510	PREDICTED: protein BCCIP homolog isoform X1 [Nelumbo nucifera]	-	-	-
Unigene0112214	-	PREDICTED: translation initiation factor IF-2 isoform X1 [Cucumis melo]	-	-	-
Unigene0048584	TPLATE	PREDICTED: protein TPLATE-like [Nelumbo nucifera]	GO:0005737//cytoplasm;GO:0005911//cell-cell junction;GO:0043228//non-membrane-bounded organelle;GO:0005622//intracellular;GO:0043229//intracellular organelle;GO:0044444//cytoplasmic part;GO:0044424//intracellular part;GO:0016020//membrane;GO:0043232//intracellular non-membrane-bounded organelle;GO:0044464//cell part;GO:0043226//organelle;GO:0030054//cell junction;GO:0005623//cell	-	GO:0030243//cellulose metabolic process;GO:0043170//macromolecule metabolic process;GO:0051179//localization;GO:0044042//glucan metabolic process;GO:0007275//multicellular organism development;GO:0071704//organic substance metabolic process;GO:0006073//cellular glucan metabolic process;GO:0006810//transport;GO:0044262//cellular carbohydrate metabolic process;GO:0044707//single-multicellular organ…
Unigene0080841	EMS1	PREDICTED: phytosulfokine receptor 2-like [Nelumbo nucifera]	-	GO:0016772//transferase activity, transferring phosphorus-containing groups;GO:0003824//catalytic activity;GO:0004672//protein kinase activity;GO:0016301//kinase activity;GO:0016740//transferase activity;GO:0016773//phosphotransferase activity, alcohol group as acceptor	GO:0044267//cellular protein metabolic process;GO:0043170//macromolecule metabolic process;GO:0016310//phosphorylation;GO:0006464//cellular protein modification process;GO:0006796//phosphate-containing compound metabolic process;GO:0036211//protein modification process;GO:0044237//cellular metabolic process;GO:0044260//cellular macromolecule metabolic process;GO:0019538//protein metabolic process…
Unigene0059076	-	PREDICTED: probable DNA-directed RNA polymerase I subunit RPA43 isoform X1 [Phoenix dactylifera]	-	-	-
Unigene0063780	SBT1.7	PREDICTED: subtilisin-like protease SBT1.7 [Jatropha curcas]	-	GO:0016787//hydrolase activity;GO:0003824//catalytic activity;GO:0070011//peptidase activity, acting on L-amino acid peptides;GO:0008233//peptidase activity	GO:0071704//organic substance metabolic process;GO:0019538//protein metabolic process;GO:0043170//macromolecule metabolic process;GO:0008152//metabolic process;GO:0044238//primary metabolic process
Unigene0059379	DDB_G0274487	Choline_transpo domain-containing protein [Cephalotus follicularis]	-	-	-
Unigene0076440	NRPB6B	DNA-directed RNA polymerase [Zostera marina]	-	-	-
Unigene0080655	-	--	-	-	-
Unigene0012363	MUR1	PREDICTED: GDP-mannose 4,6 dehydratase 1 [Vitis vinifera]	-	GO:0048037//cofactor binding;GO:0016836//hydro-lyase activity;GO:0016829//lyase activity;GO:0016835//carbon-oxygen lyase activity;GO:0005488//binding;GO:0003824//catalytic activity	GO:0009225//nucleotide-sugar metabolic process;GO:0046483//heterocycle metabolic process;GO:0009987//cellular process;GO:0008152//metabolic process;GO:0006139//nucleobase-containing compound metabolic process;GO:0044237//cellular metabolic process;GO:0071704//organic substance metabolic process;GO:1901360//organic cyclic compound metabolic process;GO:0006725//cellular aromatic compound metabolic …
Unigene0026961	CDC73	PREDICTED: protein CDC73 homolog [Nelumbo nucifera]	-	-	GO:0044707//single-multicellular organism process;GO:0048856//anatomical structure development;GO:0032502//developmental process;GO:0048731//system development;GO:0007275//multicellular organism development;GO:0000003//reproduction;GO:0044699//single-organism process;GO:0044767//single-organism developmental process;GO:0061458//reproductive system development;GO:0048608//reproductive structure de…
Unigene0096216	LACS4	PREDICTED: long chain acyl-CoA synthetase 4-like isoform X2 [Nelumbo nucifera]	-	-	-
Unigene0022520	FAM210B	Protein FAM210B, partial [Anthurium amnicola]	GO:0043227//membrane-bounded organelle;GO:0005737//cytoplasm;GO:0009507//chloroplast;GO:0043231//intracellular membrane-bounded organelle;GO:0044424//intracellular part;GO:0043229//intracellular organelle;GO:0044464//cell part;GO:0044444//cytoplasmic part;GO:0009536//plastid;GO:0043226//organelle;GO:0005623//cell;GO:0005622//intracellular	-	GO:0044767//single-organism developmental process;GO:0009987//cellular process;GO:0032502//developmental process;GO:0044699//single-organism process
Unigene0060180	EPSIN1	PREDICTED: clathrin interactor EPSIN 1-like [Nelumbo nucifera]	GO:0005622//intracellular;GO:0043231//intracellular membrane-bounded organelle;GO:0043226//organelle;GO:0005623//cell;GO:0043229//intracellular organelle;GO:0031410//cytoplasmic vesicle;GO:0043228//non-membrane-bounded organelle;GO:0044464//cell part;GO:0043227//membrane-bounded organelle;GO:0044444//cytoplasmic part;GO:0031982//vesicle;GO:0005737//cytoplasm;GO:0043232//intracellular non-membrane…	-	GO:0008104//protein localization;GO:0033036//macromolecule localization;GO:0045184//establishment of protein localization;GO:0006886//intracellular protein transport;GO:0034613//cellular protein localization;GO:0070727//cellular macromolecule localization;GO:0051179//localization;GO:0006810//transport;GO:0051649//establishment of localization in cell;GO:0051641//cellular localization;GO:0071702//…
Unigene0005674	SPBC1271.03c	PREDICTED: MATH and LRR domain-containing protein PFE0570w-like [Ziziphus jujuba]	-	-	-
Unigene0047291	efg1	PREDICTED: rRNA-processing protein EFG1 isoform X1 [Ricinus communis]	-	-	-
Unigene0010404	B3GALT6	PREDICTED: beta-1,6-galactosyltransferase GALT31A [Nelumbo nucifera]	GO:0031090//organelle membrane;GO:0044425//membrane part;GO:0016020//membrane;GO:0043226//organelle;GO:0044422//organelle part;GO:0031224//intrinsic component of membrane;GO:0043227//membrane-bounded organelle	GO:0016758//transferase activity, transferring hexosyl groups;GO:0003824//catalytic activity;GO:0008378//galactosyltransferase activity;GO:0016740//transferase activity;GO:0008194//UDP-glycosyltransferase activity;GO:0035250//UDP-galactosyltransferase activity;GO:0016757//transferase activity, transferring glycosyl groups	GO:0009890//negative regulation of biosynthetic process;GO:0050789//regulation of biological process;GO:0043412//macromolecule modification;GO:1903507//negative regulation of nucleic acid-templated transcription;GO:0009889//regulation of biosynthetic process;GO:0044710//single-organism metabolic process;GO:0006325//chromatin organization;GO:0048523//negative regulation of cellular process;GO:0044…
Unigene0018466	-	PREDICTED: mediator of RNA polymerase II transcription subunit 1 [Vitis vinifera]	-	-	-
Unigene0053933	-	PREDICTED: formin-1 isoform X1 [Sesamum indicum]	GO:0005623//cell;GO:0005622//intracellular;GO:0044464//cell part;GO:0044424//intracellular part	GO:0005488//binding	-
Unigene0053063	At2g18620	chloroplast heterodimeric geranylgeranyl pyrophosphate synthase small subunit [Paeonia lactiflora]	-	-	-
Unigene0099802	-	PREDICTED: uncharacterized protein LOC104601818 [Nelumbo nucifera]	-	-	-
Unigene0076689	pteN	PREDICTED: phosphatidylinositol 3,4,5-trisphosphate 3-phosphatase and protein-tyrosine-phosphatase PTEN2A-like [Nelumbo nucifera]	-	-	-
Unigene0052620	G3bp1	PREDICTED: ras GTPase-activating protein-binding protein 2 isoform X1 [Nelumbo nucifera]	-	-	-
Unigene0011722	HIS2A	PREDICTED: histone H2AX [Theobroma cacao]	GO:0043231//intracellular membrane-bounded organelle;GO:0044464//cell part;GO:0005623//cell;GO:0043228//non-membrane-bounded organelle;GO:0043227//membrane-bounded organelle;GO:0044424//intracellular part;GO:0043232//intracellular non-membrane-bounded organelle;GO:0005622//intracellular;GO:0043226//organelle;GO:0043229//intracellular organelle	GO:1901363//heterocyclic compound binding;GO:0046983//protein dimerization activity;GO:0003676//nucleic acid binding;GO:0005488//binding;GO:0097159//organic cyclic compound binding;GO:0005515//protein binding	-
Unigene0083869	INVB	PREDICTED: probable alkaline/neutral invertase B isoform X1 [Nelumbo nucifera]	GO:0044464//cell part;GO:0044444//cytoplasmic part;GO:0005622//intracellular;GO:0005737//cytoplasm;GO:0005623//cell;GO:0044424//intracellular part	GO:0003824//catalytic activity;GO:0004553//hydrolase activity, hydrolyzing O-glycosyl compounds;GO:0016798//hydrolase activity, acting on glycosyl bonds;GO:0016787//hydrolase activity	-
Unigene0112656	CXE6	PREDICTED: probable carboxylesterase 15 [Nelumbo nucifera]	-	-	-
Unigene0012925	AP2M	PREDICTED: AP-2 complex subunit mu [Musa acuminata subsp. malaccensis] [Musa acuminata]	GO:0016020//membrane;GO:0005737//cytoplasm;GO:0030117//membrane coat;GO:0044444//cytoplasmic part;GO:0030119//AP-type membrane coat adaptor complex;GO:0043234//protein complex;GO:0005623//cell;GO:0098796//membrane protein complex;GO:0048475//coated membrane;GO:0044424//intracellular part;GO:0032991//macromolecular complex;GO:0005622//intracellular;GO:0044464//cell part;GO:0044425//membrane part	GO:0043168//anion binding;GO:0043167//ion binding;GO:0005488//binding	GO:0045184//establishment of protein localization;GO:0006810//transport;GO:0033036//macromolecule localization;GO:0051179//localization;GO:0008104//protein localization;GO:0008152//metabolic process;GO:0015031//protein transport;GO:0051234//establishment of localization;GO:0071702//organic substance transport
Unigene0062012	-	PREDICTED: lysophospholipid acyltransferase LPEAT2-like [Arachis ipaensis]	-	-	GO:0006629//lipid metabolic process;GO:0044699//single-organism process;GO:0008152//metabolic process;GO:0044238//primary metabolic process;GO:0071704//organic substance metabolic process;GO:0044710//single-organism metabolic process
Unigene0002619	LPEAT2	PREDICTED: lysophospholipid acyltransferase LPEAT2-like [Nelumbo nucifera]	GO:0016020//membrane	GO:0016746//transferase activity, transferring acyl groups;GO:0016740//transferase activity;GO:0003824//catalytic activity	GO:0006644//phospholipid metabolic process;GO:0044699//single-organism process;GO:0044710//single-organism metabolic process;GO:0008152//metabolic process;GO:0044255//cellular lipid metabolic process;GO:0019637//organophosphate metabolic process;GO:0044238//primary metabolic process;GO:0044237//cellular metabolic process;GO:0009987//cellular process;GO:0006793//phosphorus metabolic process;GO:004…
Unigene0047292	-	PREDICTED: rRNA-processing protein EFG1 isoform X1 [Cucumis sativus]	-	-	-
Unigene0001026	RNU1	PREDICTED: U1 small nuclear ribonucleoprotein 70 kDa-like [Nelumbo nucifera]	-	-	-
Unigene0082191	DXR	1-deoxy-D-xylulose 5-phosphate reductoisomerase [Cinnamomum camphora]	-	GO:0043168//anion binding;GO:0016614//oxidoreductase activity, acting on CH-OH group of donors;GO:0043169//cation binding;GO:0016491//oxidoreductase activity;GO:0016616//oxidoreductase activity, acting on the CH-OH group of donors, NAD or NADP as acceptor;GO:0003824//catalytic activity;GO:0043167//ion binding;GO:0005488//binding	GO:0044699//single-organism process;GO:0044710//single-organism metabolic process;GO:0008152//metabolic process
Unigene0084975	GIP	Cysteine-rich RLK (receptor-like protein kinase) 8 [Dorcoceras hygrometricum]	-	-	-
Unigene0010121	-	Tetratricopeptide-like helical [Cynara cardunculus var. scolymus] [Cynara cardunculus]	-	-	-
Unigene0072604	CNOT3	CCR4-NOT transcription complex subunit 3 [Anthurium amnicola]	-	-	-
Unigene0072538	PFP-BETA	PREDICTED: pyrophosphate--fructose 6-phosphate 1-phosphotransferase subunit beta [Nelumbo nucifera]	GO:0005623//cell;GO:0044424//intracellular part;GO:0030312//external encapsulating structure;GO:0044444//cytoplasmic part;GO:0005829//cytosol;GO:0044445//cytosolic part;GO:0044464//cell part;GO:0071944//cell periphery;GO:0005622//intracellular;GO:0005737//cytoplasm	GO:0097159//organic cyclic compound binding;GO:0016773//phosphotransferase activity, alcohol group as acceptor;GO:0097367//carbohydrate derivative binding;GO:0003824//catalytic activity;GO:0016740//transferase activity;GO:0016301//kinase activity;GO:0008443//phosphofructokinase activity;GO:0001883//purine nucleoside binding;GO:0036094//small molecule binding;GO:0005488//binding;GO:0019200//carboh…	GO:0051276//chromosome organization;GO:0018193//peptidyl-amino acid modification;GO:0006796//phosphate-containing compound metabolic process;GO:0008213//protein alkylation;GO:0044238//primary metabolic process;GO:0006084//acetyl-CoA metabolic process;GO:0019752//carboxylic acid metabolic process;GO:0010605//negative regulation of macromolecule metabolic process;GO:0009892//negative regulation of …
Unigene0101058	TOM20	PREDICTED: mitochondrial import receptor subunit TOM20 isoform X1 [Musa acuminata subsp. malaccensis] [Musa acuminata]	GO:0005737//cytoplasm;GO:0044425//membrane part;GO:0031966//mitochondrial membrane;GO:0005840//ribosome;GO:0030529//intracellular ribonucleoprotein complex;GO:0043229//intracellular organelle;GO:0031090//organelle membrane;GO:0031975//envelope;GO:0005623//cell;GO:0044429//mitochondrial part;GO:0005622//intracellular;GO:0043227//membrane-bounded organelle;GO:0043228//non-membrane-bounded organelle…	GO:0008320//protein transmembrane transporter activity;GO:0043169//cation binding;GO:0022884//macromolecule transmembrane transporter activity;GO:0005215//transporter activity;GO:0043167//ion binding;GO:0005488//binding;GO:0022891//substrate-specific transmembrane transporter activity;GO:0022857//transmembrane transporter activity;GO:0022892//substrate-specific transporter activity;GO:0008565//pr…	GO:0051234//establishment of localization;GO:0051649//establishment of localization in cell;GO:0044765//single-organism transport;GO:0033036//macromolecule localization;GO:0070727//cellular macromolecule localization;GO:0006605//protein targeting;GO:0045184//establishment of protein localization;GO:0051641//cellular localization;GO:0051179//localization;GO:0006886//intracellular protein transport…
Unigene0060075	ARP	PREDICTED: DNA-(apurinic or apyrimidinic site) lyase, chloroplastic isoform X1 [Nelumbo nucifera]	-	-	-
Unigene0036078	MBF1B	PREDICTED: multiprotein-bridging factor 1b [Amborella trichopoda]	-	GO:1901363//heterocyclic compound binding;GO:0097159//organic cyclic compound binding;GO:0005488//binding;GO:0003677//DNA binding;GO:0003676//nucleic acid binding	-
Unigene0005998	PIP5K1	PREDICTED: phosphatidylinositol 4-phosphate 5-kinase 1-like [Nelumbo nucifera]	-	GO:0016740//transferase activity;GO:0016772//transferase activity, transferring phosphorus-containing groups;GO:0003824//catalytic activity;GO:0016301//kinase activity	GO:0046486//glycerolipid metabolic process;GO:0006629//lipid metabolic process;GO:0071704//organic substance metabolic process;GO:0044255//cellular lipid metabolic process;GO:0019637//organophosphate metabolic process;GO:0006793//phosphorus metabolic process;GO:0044238//primary metabolic process;GO:0006650//glycerophospholipid metabolic process;GO:0044763//single-organism cellular process;GO:0006…
Unigene0043391	slr0305	PREDICTED: transmembrane protein 64 [Fragaria vesca subsp. vesca] [Fragaria vesca]	-	-	-
Unigene0049034	HPD	PREDICTED: 4-hydroxyphenylpyruvate dioxygenase [Nelumbo nucifera]	-	GO:0003824//catalytic activity;GO:0005488//binding;GO:0043169//cation binding;GO:0043167//ion binding;GO:0016491//oxidoreductase activity	GO:0043436//oxoacid metabolic process;GO:0071704//organic substance metabolic process;GO:0006082//organic acid metabolic process;GO:0044238//primary metabolic process;GO:0044699//single-organism process;GO:0009987//cellular process;GO:0044281//small molecule metabolic process;GO:0044237//cellular metabolic process;GO:1901564//organonitrogen compound metabolic process;GO:0019752//carboxylic acid m…
Unigene0033834	HSL1	PREDICTED: receptor-like protein kinase HSL1 [Nelumbo nucifera]	-	-	-
Unigene0046213	eft201	elongation factor 2 [Ananas comosus]	GO:0032991//macromolecular complex;GO:0030529//intracellular ribonucleoprotein complex;GO:1990904//ribonucleoprotein complex;GO:0044464//cell part;GO:0005622//intracellular;GO:0005623//cell;GO:0044424//intracellular part	GO:0097367//carbohydrate derivative binding;GO:0003824//catalytic activity;GO:0003723//RNA binding;GO:0016462//pyrophosphatase activity;GO:0032550//purine ribonucleoside binding;GO:0016818//hydrolase activity, acting on acid anhydrides, in phosphorus-containing anhydrides;GO:0016817//hydrolase activity, acting on acid anhydrides;GO:1901363//heterocyclic compound binding;GO:0032549//ribonucleoside…	GO:0044260//cellular macromolecule metabolic process;GO:0071704//organic substance metabolic process;GO:0008152//metabolic process;GO:1901576//organic substance biosynthetic process;GO:0009058//biosynthetic process;GO:0044249//cellular biosynthetic process;GO:0009059//macromolecule biosynthetic process;GO:0044237//cellular metabolic process;GO:0009987//cellular process;GO:0043170//macromolecule m…
Unigene0056950	SBP2	PREDICTED: selenium-binding protein 1 [Theobroma cacao]	-	-	-
Unigene0080555	Acel_0614	Cellulase protein [Theobroma cacao]	-	GO:0016787//hydrolase activity;GO:0003824//catalytic activity	GO:0044238//primary metabolic process;GO:0008152//metabolic process
Unigene0065294	SKI3	PREDICTED: tetratricopeptide repeat protein SKI3 [Nelumbo nucifera]	-	-	-
Unigene0079192	-	--	-	-	-
Unigene0063854	HDH	PREDICTED: histidinol dehydrogenase, chloroplastic isoform X1 [Elaeis guineensis]	GO:0009536//plastid;GO:0043226//organelle;GO:0044435//plastid part;GO:0005622//intracellular;GO:0043229//intracellular organelle;GO:0009532//plastid stroma;GO:0044444//cytoplasmic part;GO:0043227//membrane-bounded organelle;GO:0005737//cytoplasm;GO:0044422//organelle part;GO:0044424//intracellular part;GO:0005623//cell;GO:0043231//intracellular membrane-bounded organelle;GO:0044464//cell part;GO:…	GO:1901363//heterocyclic compound binding;GO:0046872//metal ion binding;GO:0043169//cation binding;GO:0003824//catalytic activity;GO:0036094//small molecule binding;GO:0046914//transition metal ion binding;GO:0016616//oxidoreductase activity, acting on the CH-OH group of donors, NAD or NADP as acceptor;GO:0016491//oxidoreductase activity;GO:1901265//nucleoside phosphate binding;GO:0016614//oxidor…	GO:0009058//biosynthetic process;GO:0006520//cellular amino acid metabolic process;GO:0007275//multicellular organism development;GO:0044106//cellular amine metabolic process;GO:0044237//cellular metabolic process;GO:1901564//organonitrogen compound metabolic process;GO:0044249//cellular biosynthetic process;GO:0009987//cellular process;GO:0044710//single-organism metabolic process;GO:0006807//ni…
Unigene0112215	-	PREDICTED: translation initiation factor IF-2 isoform X1 [Cucumis melo]	-	-	-
Unigene0112459	-	UDP-N-acetylmuramoylalanine--D-glutamate ligase [Anthurium amnicola]	GO:0043227//membrane-bounded organelle;GO:0043229//intracellular organelle;GO:0044434//chloroplast part;GO:0043226//organelle;GO:0009536//plastid;GO:0044435//plastid part;GO:0044446//intracellular organelle part;GO:0009507//chloroplast;GO:0043231//intracellular membrane-bounded organelle;GO:0044464//cell part;GO:0005737//cytoplasm;GO:0044422//organelle part;GO:0005623//cell;GO:0044424//intracellu…	-	-
Unigene0108038	CCDC174	PREDICTED: uncharacterized protein At4g18257-like [Nelumbo nucifera]	-	-	-
Unigene0044956	HST	PREDICTED: shikimate O-hydroxycinnamoyltransferase [Nelumbo nucifera]	-	-	-
Unigene0079454	At1g04430	PREDICTED: probable methyltransferase PMT3 [Eucalyptus grandis]	-	-	-
Unigene0009495	DI19-6	PREDICTED: protein DEHYDRATION-INDUCED 19 homolog 5-like [Nelumbo nucifera]	-	-	-
Unigene0069696	-	--	-	-	-
Unigene0004962	-	octicosapeptide/Phox/Bem1p domain-containing family protein [Populus trichocarpa]	-	-	-
Unigene0083769	SPT16	PREDICTED: FACT complex subunit SPT16 [Vitis vinifera]	-	-	-
Unigene0077562	G3bp1	PREDICTED: ras GTPase-activating protein-binding protein 2 isoform X2 [Nelumbo nucifera]	-	-	-
Unigene0066086	At3g50210	PREDICTED: probable 2-oxoglutarate-dependent dioxygenase At3g49630 [Ziziphus jujuba]	-	GO:0016491//oxidoreductase activity;GO:0046872//metal ion binding;GO:0005488//binding;GO:0046914//transition metal ion binding;GO:0043167//ion binding;GO:0043169//cation binding;GO:0016705//oxidoreductase activity, acting on paired donors, with incorporation or reduction of molecular oxygen;GO:0003824//catalytic activity	GO:0008152//metabolic process;GO:0044699//single-organism process;GO:0044710//single-organism metabolic process
Unigene0043147	RNU1	PREDICTED: U1 small nuclear ribonucleoprotein 70 kDa-like [Nelumbo nucifera]	-	-	-
Unigene0104922	HHT1	PREDICTED: omega-hydroxypalmitate O-feruloyl transferase-like [Nelumbo nucifera]	-	GO:0016747//transferase activity, transferring acyl groups other than amino-acyl groups;GO:0016740//transferase activity;GO:0003824//catalytic activity;GO:0016746//transferase activity, transferring acyl groups	-
Unigene0110771	44257	PREDICTED: mitochondrial amidoxime reducing component 2 isoform X1 [Nelumbo nucifera]	-	GO:0046914//transition metal ion binding;GO:0043167//ion binding;GO:0005488//binding;GO:0043169//cation binding;GO:0043168//anion binding;GO:0046872//metal ion binding	-
Unigene0101732	-	hypothetical protein BRADI_1g78126 [Brachypodium distachyon]	-	-	-
Unigene0056649	At4g32940	PREDICTED: vacuolar-processing enzyme [Elaeis guineensis]	-	GO:0003824//catalytic activity;GO:0016787//hydrolase activity	GO:0019538//protein metabolic process;GO:0044238//primary metabolic process;GO:0071704//organic substance metabolic process;GO:0008152//metabolic process;GO:0043170//macromolecule metabolic process
Unigene0046142	TPI	PREDICTED: triosephosphate isomerase, chloroplastic [Juglans regia]	GO:0005622//intracellular;GO:0005576//extracellular region;GO:0031967//organelle envelope;GO:0043229//intracellular organelle;GO:0044422//organelle part;GO:0005737//cytoplasm;GO:0044444//cytoplasmic part;GO:0043227//membrane-bounded organelle;GO:0043231//intracellular membrane-bounded organelle;GO:0005623//cell;GO:0044446//intracellular organelle part;GO:0044424//intracellular part;GO:0044435//pl…	GO:0016853//isomerase activity;GO:0016861//intramolecular oxidoreductase activity, interconverting aldoses and ketoses;GO:0016860//intramolecular oxidoreductase activity;GO:0003824//catalytic activity	GO:0009072//aromatic amino acid family metabolic process;GO:0033036//macromolecule localization;GO:0044262//cellular carbohydrate metabolic process;GO:0044707//single-multicellular organism process;GO:1901566//organonitrogen compound biosynthetic process;GO:0006071//glycerol metabolic process;GO:0010817//regulation of hormone levels;GO:0022622//root system development;GO:0009628//response to abio…
Unigene0035647	RHD3	PREDICTED: protein ROOT HAIR DEFECTIVE 3 [Elaeis guineensis]	GO:0005622//intracellular;GO:0031090//organelle membrane;GO:0005623//cell;GO:0044422//organelle part;GO:0044464//cell part;GO:0031224//intrinsic component of membrane;GO:0043231//intracellular membrane-bounded organelle;GO:0016020//membrane;GO:0044425//membrane part;GO:0043226//organelle;GO:0043227//membrane-bounded organelle;GO:0043229//intracellular organelle;GO:0044424//intracellular part	GO:0016818//hydrolase activity, acting on acid anhydrides, in phosphorus-containing anhydrides;GO:0001882//nucleoside binding;GO:0032550//purine ribonucleoside binding;GO:0003824//catalytic activity;GO:0032549//ribonucleoside binding;GO:1901363//heterocyclic compound binding;GO:0016817//hydrolase activity, acting on acid anhydrides;GO:0016462//pyrophosphatase activity;GO:0017111//nucleoside-triph…	-
Unigene0046141	TPIP1	PREDICTED: triosephosphate isomerase, chloroplastic isoform X1 [Nelumbo nucifera]	GO:0005576//extracellular region;GO:0044444//cytoplasmic part;GO:0044446//intracellular organelle part;GO:0009536//plastid;GO:0031975//envelope;GO:0005737//cytoplasm;GO:0005622//intracellular;GO:0044424//intracellular part;GO:0043226//organelle;GO:0043229//intracellular organelle;GO:0043227//membrane-bounded organelle;GO:0044422//organelle part;GO:0009532//plastid stroma;GO:0044435//plastid part;…	GO:0016853//isomerase activity;GO:0003824//catalytic activity;GO:0016861//intramolecular oxidoreductase activity, interconverting aldoses and ketoses;GO:0016860//intramolecular oxidoreductase activity	GO:0044711//single-organism biosynthetic process;GO:0006790//sulfur compound metabolic process;GO:0006796//phosphate-containing compound metabolic process;GO:0009628//response to abiotic stimulus;GO:0033036//macromolecule localization;GO:0009058//biosynthetic process;GO:0007275//multicellular organism development;GO:0000003//reproduction;GO:0099402//plant organ development;GO:0008152//metabolic p…
Unigene0062014	-	PREDICTED: lysophospholipid acyltransferase LPEAT2-like [Arachis ipaensis]	-	-	-
Unigene0087956	-	PREDICTED: eukaryotic translation initiation factor 4B3-like [Nelumbo nucifera]	-	-	-
Unigene0024617	At2g44510	PREDICTED: protein BCCIP homolog isoform X1 [Nelumbo nucifera]	-	-	-
Unigene0083775	RDR1	PREDICTED: probable RNA-dependent RNA polymerase 1 [Phoenix dactylifera]	-	-	-
Unigene0049085	At3g50520	PREDICTED: phosphoglycerate mutase-like protein 4 isoform X1 [Nelumbo nucifera]	-	-	-
Unigene0010188	CDF2	PREDICTED: cyclic dof factor 3-like [Nelumbo nucifera]	-	-	-
Unigene0052777	SOD	PREDICTED: superoxide dismutase [Mn], mitochondrial [Gossypium hirsutum]	-	GO:0043167//ion binding;GO:0043169//cation binding;GO:0003824//catalytic activity;GO:0005488//binding	GO:0009987//cellular process;GO:0044237//cellular metabolic process;GO:0072593//reactive oxygen species metabolic process;GO:0044710//single-organism metabolic process;GO:0006801//superoxide metabolic process;GO:0008152//metabolic process;GO:0044699//single-organism process
Unigene0056422	At1g67280	PREDICTED: probable lactoylglutathione lyase, chloroplastic [Nelumbo nucifera]	-	-	-
Unigene0069181	BGAL16	PREDICTED: beta-galactosidase 16 isoform X2 [Nelumbo nucifera]	GO:0005576//extracellular region	GO:0016798//hydrolase activity, acting on glycosyl bonds;GO:0004553//hydrolase activity, hydrolyzing O-glycosyl compounds;GO:0016787//hydrolase activity;GO:0003824//catalytic activity	GO:0008152//metabolic process
Unigene0100663	rps5	PREDICTED: 30S ribosomal protein S5, chloroplastic [Nelumbo nucifera]	GO:0005737//cytoplasm;GO:0032991//macromolecular complex;GO:0044446//intracellular organelle part;GO:0044464//cell part;GO:0005623//cell;GO:0030529//intracellular ribonucleoprotein complex;GO:0009507//chloroplast;GO:0031976//plastid thylakoid;GO:0043228//non-membrane-bounded organelle;GO:0044444//cytoplasmic part;GO:0009536//plastid;GO:0031984//organelle subcompartment;GO:0043232//intracellular n…	-	-
Unigene0059377	-	PREDICTED: CTL-like protein DDB_G0274487 [Elaeis guineensis]	GO:0016020//membrane;GO:0044425//membrane part;GO:0031224//intrinsic component of membrane	-	GO:0043436//oxoacid metabolic process;GO:0008652//cellular amino acid biosynthetic process;GO:0044238//primary metabolic process;GO:0044711//single-organism biosynthetic process;GO:0044249//cellular biosynthetic process;GO:0044281//small molecule metabolic process;GO:0000096//sulfur amino acid metabolic process;GO:0044710//single-organism metabolic process;GO:0016053//organic acid biosynthetic pr…
Unigene0111149	Os05g0558800	PREDICTED: ninja-family protein mc410 [Nelumbo nucifera]	-	-	-
Unigene0057480	FTSH12	PREDICTED: ATP-dependent zinc metalloprotease FTSH 12, chloroplastic [Nelumbo nucifera]	GO:0043229//intracellular organelle;GO:0009507//chloroplast;GO:0009536//plastid;GO:0044446//intracellular organelle part;GO:0016020//membrane;GO:0043231//intracellular membrane-bounded organelle;GO:0044422//organelle part;GO:0005622//intracellular;GO:0031967//organelle envelope;GO:0031224//intrinsic component of membrane;GO:0044434//chloroplast part;GO:0044464//cell part;GO:0044424//intracellular…	GO:0017111//nucleoside-triphosphatase activity;GO:0001882//nucleoside binding;GO:0001883//purine nucleoside binding;GO:0003824//catalytic activity;GO:0097159//organic cyclic compound binding;GO:0070011//peptidase activity, acting on L-amino acid peptides;GO:0043167//ion binding;GO:0016817//hydrolase activity, acting on acid anhydrides;GO:1901363//heterocyclic compound binding;GO:0032550//purine r…	GO:0009987//cellular process;GO:1901575//organic substance catabolic process;GO:0022414//reproductive process;GO:0044267//cellular protein metabolic process;GO:0016043//cellular component organization;GO:0009057//macromolecule catabolic process;GO:0030163//protein catabolic process;GO:0044257//cellular protein catabolic process;GO:0006996//organelle organization;GO:0008152//metabolic process;GO:0…
Unigene0039685	At4g17486	PREDICTED: deSI-like protein At4g17486 [Vitis vinifera]	-	-	-
Unigene0021919	-	PREDICTED: transmembrane protein 33 homolog [Juglans regia]	GO:0044425//membrane part;GO:0005911//cell-cell junction;GO:0016020//membrane;GO:0043231//intracellular membrane-bounded organelle;GO:0031224//intrinsic component of membrane;GO:0044464//cell part;GO:0043229//intracellular organelle;GO:0005623//cell;GO:0005622//intracellular;GO:0030054//cell junction;GO:0043227//membrane-bounded organelle;GO:0043226//organelle;GO:0044424//intracellular part	-	-
Unigene0007850	TAF15B	PREDICTED: transcription initiation factor TFIID subunit 15b-like isoform X1 [Glycine max]	-	-	-
Unigene0033406	ACCB-1	biotin carboxyl carrier protein [Persea americana]	-	-	-
Unigene0058815	P4H4	PREDICTED: probable prolyl 4-hydroxylase 4 [Nelumbo nucifera]	-	GO:0019842//vitamin binding;GO:0016491//oxidoreductase activity;GO:0046914//transition metal ion binding;GO:0046872//metal ion binding;GO:0003824//catalytic activity;GO:0016705//oxidoreductase activity, acting on paired donors, with incorporation or reduction of molecular oxygen;GO:0036094//small molecule binding;GO:0005488//binding;GO:0043169//cation binding;GO:0043167//ion binding	GO:0044267//cellular protein metabolic process;GO:0044237//cellular metabolic process;GO:0044710//single-organism metabolic process;GO:0008152//metabolic process;GO:0071704//organic substance metabolic process;GO:0006464//cellular protein modification process;GO:0019538//protein metabolic process;GO:0044699//single-organism process;GO:0043170//macromolecule metabolic process;GO:0043412//macromole…
Unigene0081554	bbp-1	PREDICTED: splicing factor 1 [Nelumbo nucifera]	-	GO:0003676//nucleic acid binding;GO:0005488//binding;GO:0097159//organic cyclic compound binding;GO:1901363//heterocyclic compound binding	-
Unigene0066140	Cag_1601	PREDICTED: UPF0301 protein Cpha266_0885 [Citrus sinensis]	-	-	-
Unigene0076099	VIII-1	PREDICTED: myosin-1-like [Nelumbo nucifera]	GO:0043229//intracellular organelle;GO:0044424//intracellular part;GO:0005622//intracellular;GO:0043232//intracellular non-membrane-bounded organelle;GO:0005856//cytoskeleton;GO:0043228//non-membrane-bounded organelle;GO:0005623//cell;GO:0043226//organelle;GO:0015629//actin cytoskeleton;GO:0044464//cell part	GO:0005488//binding;GO:1901363//heterocyclic compound binding;GO:0097159//organic cyclic compound binding;GO:0032549//ribonucleoside binding;GO:0016462//pyrophosphatase activity;GO:0016818//hydrolase activity, acting on acid anhydrides, in phosphorus-containing anhydrides;GO:0001883//purine nucleoside binding;GO:0097367//carbohydrate derivative binding;GO:0032550//purine ribonucleoside binding;GO…	-
Unigene0077941	HATB	PREDICTED: probable histone acetyltransferase type B catalytic subunit [Elaeis guineensis]	-	-	GO:0009987//cellular process
Unigene0000445	At4g17486	PREDICTED: deSI-like protein At4g17486 [Vitis vinifera]	-	-	-
Unigene0073469	PP2B10	PREDICTED: F-box protein PP2-B15-like [Nelumbo nucifera]	-	-	-
Unigene0111819	RPE	PREDICTED: ribulose-phosphate 3-epimerase, chloroplastic [Nelumbo nucifera]	GO:0031967//organelle envelope;GO:0005622//intracellular;GO:0005623//cell;GO:0043226//organelle;GO:0043229//intracellular organelle;GO:0005737//cytoplasm;GO:0009532//plastid stroma;GO:0009536//plastid;GO:0043231//intracellular membrane-bounded organelle;GO:0044435//plastid part;GO:0044422//organelle part;GO:0043227//membrane-bounded organelle;GO:0044444//cytoplasmic part;GO:0009526//plastid envel…	GO:0016857//racemase and epimerase activity, acting on carbohydrates and derivatives;GO:0016854//racemase and epimerase activity;GO:0043169//cation binding;GO:0043167//ion binding;GO:0005488//binding;GO:0003824//catalytic activity;GO:0016853//isomerase activity	GO:0006739//NADP metabolic process;GO:0044237//cellular metabolic process;GO:0006807//nitrogen compound metabolic process;GO:0006733//oxidoreduction coenzyme metabolic process;GO:0071704//organic substance metabolic process;GO:1901360//organic cyclic compound metabolic process;GO:0009617//response to bacterium;GO:1901564//organonitrogen compound metabolic process;GO:0051186//cofactor metabolic pr…
Unigene0056689	UKL3	PREDICTED: uridine kinase-like protein 3 [Vitis vinifera]	-	GO:0019205//nucleobase-containing compound kinase activity;GO:0032549//ribonucleoside binding;GO:0036094//small molecule binding;GO:0005488//binding;GO:1901363//heterocyclic compound binding;GO:0097367//carbohydrate derivative binding;GO:0001883//purine nucleoside binding;GO:0019206//nucleoside kinase activity;GO:0001882//nucleoside binding;GO:0097159//organic cyclic compound binding;GO:0016772//…	GO:0009259//ribonucleotide metabolic process;GO:0044238//primary metabolic process;GO:0009123//nucleoside monophosphate metabolic process;GO:0019693//ribose phosphate metabolic process;GO:1901564//organonitrogen compound metabolic process;GO:0009209//pyrimidine ribonucleoside triphosphate biosynthetic process;GO:0009147//pyrimidine nucleoside triphosphate metabolic process;GO:0046134//pyrimidine …
Unigene0016267	DHAR2	PREDICTED: glutathione S-transferase DHAR2 [Amborella trichopoda]	-	-	-
Unigene0041329	At2g17670	PREDICTED: pentatricopeptide repeat-containing protein At2g17670 [Nelumbo nucifera]	-	-	-
Unigene0100675	CCDC25	PREDICTED: coiled-coil domain-containing protein 25 [Amborella trichopoda]	-	-	GO:0006810//transport;GO:0051234//establishment of localization;GO:0051179//localization
Unigene0059022	RPS15AA	PREDICTED: 40S ribosomal protein S15a-1-like [Gossypium hirsutum]	-	-	-
Unigene0031282	RANBP1C	Ran-binding protein 1-b-like protein [Morus notabilis]	-	-	-
Unigene0043301	KN1	PREDICTED: homeobox protein knotted-1-like 2 [Theobroma cacao]	GO:0043231//intracellular membrane-bounded organelle;GO:0005623//cell;GO:0043226//organelle;GO:0044424//intracellular part;GO:0043229//intracellular organelle;GO:0005622//intracellular;GO:0043227//membrane-bounded organelle;GO:0044464//cell part	GO:0097159//organic cyclic compound binding;GO:0001071//nucleic acid binding transcription factor activity;GO:0003676//nucleic acid binding;GO:0005488//binding;GO:1901363//heterocyclic compound binding;GO:0003677//DNA binding	GO:0009933//meristem structural organization;GO:0048856//anatomical structure development;GO:0003002//regionalization;GO:0000003//reproduction;GO:0060255//regulation of macromolecule metabolic process;GO:0007389//pattern specification process;GO:0048507//meristem development;GO:0003006//developmental process involved in reproduction;GO:0009799//specification of symmetry;GO:0032501//multicellular …
Unigene0046250	-	Glutamate--cysteine ligase [Anthurium amnicola]	-	-	-
Unigene0113115	SLC47A2	PREDICTED: protein DETOXIFICATION 55-like [Nelumbo nucifera]	GO:0044425//membrane part;GO:0031224//intrinsic component of membrane;GO:0016020//membrane	GO:0005215//transporter activity;GO:0015291//secondary active transmembrane transporter activity;GO:0022804//active transmembrane transporter activity;GO:0022857//transmembrane transporter activity	GO:0009987//cellular process;GO:0044699//single-organism process;GO:0044763//single-organism cellular process
Unigene0046642	-	PREDICTED: autophagy-related protein 11 [Nelumbo nucifera]	-	-	-
Unigene0060307	GAE6	PREDICTED: UDP-glucuronate 4-epimerase 6 [Vitis vinifera]	GO:0016020//membrane;GO:0005623//cell;GO:0098588//bounding membrane of organelle;GO:0012505//endomembrane system;GO:0043231//intracellular membrane-bounded organelle;GO:0044422//organelle part;GO:0043227//membrane-bounded organelle;GO:0031984//organelle subcompartment;GO:0005622//intracellular;GO:0044431//Golgi apparatus part;GO:0044424//intracellular part;GO:0005794//Golgi apparatus;GO:0000139//…	GO:0016857//racemase and epimerase activity, acting on carbohydrates and derivatives;GO:0003824//catalytic activity;GO:0005488//binding;GO:0016854//racemase and epimerase activity;GO:0048037//cofactor binding;GO:0016853//isomerase activity	GO:0006586//indolalkylamine metabolic process;GO:0044106//cellular amine metabolic process;GO:0009850//auxin metabolic process;GO:0071704//organic substance metabolic process;GO:0009987//cellular process;GO:0009683//indoleacetic acid metabolic process;GO:0006520//cellular amino acid metabolic process;GO:0006807//nitrogen compound metabolic process;GO:0032787//monocarboxylic acid metabolic process…
Unigene0046249	-	Glutamate--cysteine ligase [Anthurium amnicola]	-	-	-
Unigene0065795	RABB1C	PREDICTED: ras-related protein RABB1c-like [Phoenix dactylifera]	-	-	-
Unigene0079123	At4g22670	PREDICTED: TPR repeat-containing thioredoxin TDX isoform X1 [Musa acuminata subsp. malaccensis] [Musa acuminata]	-	-	-
Unigene0034001	ABCF1	PREDICTED: ABC transporter F family member 1-like [Nelumbo nucifera]	-	GO:0097159//organic cyclic compound binding;GO:0097367//carbohydrate derivative binding;GO:0016817//hydrolase activity, acting on acid anhydrides;GO:1901363//heterocyclic compound binding;GO:0016462//pyrophosphatase activity;GO:0017111//nucleoside-triphosphatase activity;GO:0036094//small molecule binding;GO:0001882//nucleoside binding;GO:0032549//ribonucleoside binding;GO:0032550//purine ribonuc…	-
Unigene0020244	-	TAC1 [Prunus persica]	-	-	-
Unigene0043302	KN1	PREDICTED: homeobox protein knotted-1-like 2 [Theobroma cacao]	GO:0005623//cell;GO:0043229//intracellular organelle;GO:0043226//organelle;GO:0043231//intracellular membrane-bounded organelle;GO:0044424//intracellular part;GO:0044464//cell part;GO:0043227//membrane-bounded organelle;GO:0005622//intracellular	GO:0005488//binding;GO:0001071//nucleic acid binding transcription factor activity;GO:0097159//organic cyclic compound binding;GO:1901363//heterocyclic compound binding;GO:0003677//DNA binding;GO:0003676//nucleic acid binding	GO:0009799//specification of symmetry;GO:0000003//reproduction;GO:0044699//single-organism process;GO:0032502//developmental process;GO:0009798//axis specification;GO:0048507//meristem development;GO:0044763//single-organism cellular process;GO:0044767//single-organism developmental process;GO:0032501//multicellular organismal process;GO:0009888//tissue development;GO:0044707//single-multicellula…
Unigene0041423	COAD	PREDICTED: phosphopantetheine adenylyltransferase [Nelumbo nucifera]	-	-	-
Unigene0041422	Os07g0179400	PREDICTED: phosphopantetheine adenylyltransferase [Nelumbo nucifera]	-	-	-
Unigene0054879	ATHB-15	PREDICTED: homeobox-leucine zipper protein ATHB-15-like [Nelumbo nucifera]	GO:0043229//intracellular organelle;GO:0043231//intracellular membrane-bounded organelle;GO:0043226//organelle;GO:0005623//cell;GO:0044424//intracellular part;GO:0005622//intracellular;GO:0044464//cell part;GO:0043227//membrane-bounded organelle	GO:0003676//nucleic acid binding;GO:0001071//nucleic acid binding transcription factor activity;GO:0003677//DNA binding;GO:1901363//heterocyclic compound binding;GO:0097159//organic cyclic compound binding;GO:0005488//binding	GO:0048869//cellular developmental process;GO:0006950//response to stress;GO:0071840//cellular component organization or biogenesis;GO:1902589//single-organism organelle organization;GO:0030036//actin cytoskeleton organization;GO:0007015//actin filament organization;GO:0000902//cell morphogenesis;GO:0022622//root system development;GO:0009943//adaxial/abaxial axis specification;GO:0048513//animal…
Unigene0069197	JMJ25	PREDICTED: LOW QUALITY PROTEIN: lysine-specific demethylase JMJ25-like [Phoenix dactylifera]	-	-	-
Unigene0063979	zgc:66014	PREDICTED: lisH domain and HEAT repeat-containing protein KIAA1468 homolog [Vitis vinifera]	-	-	-
Unigene0065103	TMN1	PREDICTED: transmembrane 9 superfamily member 1 [Daucus carota subsp. sativus] [Daucus carota]	-	-	-
Unigene0086027	Rwdd1	PREDICTED: RWD domain-containing protein 1 isoform X2 [Nelumbo nucifera]	-	-	-
Unigene0060290	Wdfy3	PREDICTED: protein SPIRRIG [Vitis vinifera]	-	-	-
Unigene0004000	WVD2	PREDICTED: protein WVD2-like 5 [Nelumbo nucifera]	-	-	-
Unigene0054035	APS3	PREDICTED: ATP sulfurylase 1, chloroplastic [Nelumbo nucifera]	-	GO:0016740//transferase activity;GO:0070566//adenylyltransferase activity;GO:0016779//nucleotidyltransferase activity;GO:0016772//transferase activity, transferring phosphorus-containing groups;GO:0003824//catalytic activity;GO:0004779//sulfate adenylyltransferase activity	-
Unigene0033936	TT12	PREDICTED: protein DETOXIFICATION 35 [Nelumbo nucifera]	GO:0044425//membrane part;GO:0016020//membrane;GO:0031224//intrinsic component of membrane	GO:0005215//transporter activity;GO:0015291//secondary active transmembrane transporter activity;GO:0022804//active transmembrane transporter activity;GO:0022857//transmembrane transporter activity	GO:0009653//anatomical structure morphogenesis;GO:0030154//cell differentiation;GO:0000902//cell morphogenesis;GO:0048869//cellular developmental process;GO:0048468//cell development;GO:0006928//movement of cell or subcellular component;GO:0016043//cellular component organization;GO:0044767//single-organism developmental process;GO:0000904//cell morphogenesis involved in differentiation;GO:000998…
Unigene0053344	At1g17710	PREDICTED: inorganic pyrophosphatase 1 [Nelumbo nucifera]	-	GO:0016788//hydrolase activity, acting on ester bonds;GO:0042578//phosphoric ester hydrolase activity;GO:0003824//catalytic activity;GO:0016787//hydrolase activity	GO:0006793//phosphorus metabolic process;GO:0044237//cellular metabolic process;GO:0009987//cellular process;GO:0008152//metabolic process;GO:0006796//phosphate-containing compound metabolic process
Unigene0074989	CDKG-2	PREDICTED: cyclin-dependent kinase G-2 isoform X2 [Nelumbo nucifera]	-	GO:0016740//transferase activity;GO:0003824//catalytic activity	-
Unigene0014009	GAMMACAL1	PREDICTED: gamma carbonic anhydrase-like 2, mitochondrial [Nelumbo nucifera]	-	-	-
Unigene0059226	FEN1	PREDICTED: flap endonuclease 1 isoform X2 [Prunus mume]	-	-	-
Unigene0028143	PEX11C	Peroxisomal membrane protein 11C [Morus notabilis]	-	-	GO:0007031//peroxisome organization;GO:0016043//cellular component organization;GO:0009987//cellular process;GO:0006996//organelle organization;GO:0071840//cellular component organization or biogenesis
Unigene0053343	At1g17710	PREDICTED: inorganic pyrophosphatase 1 [Nelumbo nucifera]	-	GO:0003824//catalytic activity;GO:0042578//phosphoric ester hydrolase activity;GO:0016788//hydrolase activity, acting on ester bonds;GO:0016787//hydrolase activity	GO:0006796//phosphate-containing compound metabolic process;GO:0006793//phosphorus metabolic process;GO:0044237//cellular metabolic process;GO:0009987//cellular process;GO:0008152//metabolic process
Unigene0108877	RANBP1C	Ran-binding protein 1-b-like protein [Morus notabilis]	-	-	-
Unigene0038383	FRS5	PREDICTED: protein FAR1-RELATED SEQUENCE 5 [Amborella trichopoda]	-	-	-
Unigene0065105	TMN1	PREDICTED: transmembrane 9 superfamily member 1-like isoform X1 [Gossypium raimondii]	-	-	-
Unigene0071566	ypi1	PREDICTED: LOW QUALITY PROTEIN: type 1 phosphatases regulator ypi1 [Cucumis melo]	GO:0032991//macromolecular complex;GO:1903293//phosphatase complex;GO:0005622//intracellular;GO:0044424//intracellular part;GO:0043234//protein complex;GO:0043226//organelle;GO:0043227//membrane-bounded organelle;GO:0044464//cell part;GO:0043231//intracellular membrane-bounded organelle;GO:0005623//cell;GO:0043229//intracellular organelle;GO:1902494//catalytic complex;GO:0008287//protein serine/t…	-	GO:0031323//regulation of cellular metabolic process;GO:0022414//reproductive process;GO:0035308//negative regulation of protein dephosphorylation;GO:0050790//regulation of catalytic activity;GO:0045936//negative regulation of phosphate metabolic process;GO:0080090//regulation of primary metabolic process;GO:0019220//regulation of phosphate metabolic process;GO:0051248//negative regulation of pro…
Unigene0085968	NUA	PREDICTED: nuclear-pore anchor isoform X3 [Nelumbo nucifera]	-	-	-
Unigene0094505	PURA1	PREDICTED: transcription factor Pur-alpha 1-like [Nelumbo nucifera]	-	-	-
Unigene0001903	SYT1	PREDICTED: synaptotagmin-2-like [Nelumbo nucifera]	-	-	-
Unigene0025431	ACS10	PREDICTED: probable aminotransferase ACS10 [Theobroma cacao]	-	GO:0043167//ion binding;GO:0005488//binding;GO:0016769//transferase activity, transferring nitrogenous groups;GO:0008483//transaminase activity;GO:0016740//transferase activity;GO:0003824//catalytic activity;GO:0043168//anion binding	GO:0044281//small molecule metabolic process;GO:0071704//organic substance metabolic process;GO:0044237//cellular metabolic process;GO:0019752//carboxylic acid metabolic process;GO:0006082//organic acid metabolic process;GO:0043436//oxoacid metabolic process;GO:0008152//metabolic process;GO:0044699//single-organism process;GO:0009987//cellular process;GO:0044763//single-organism cellular process;…
Unigene0071561	ypi1	PREDICTED: LOW QUALITY PROTEIN: type 1 phosphatases regulator ypi1 [Cucumis melo]	GO:0005623//cell;GO:0044424//intracellular part;GO:0043229//intracellular organelle;GO:1903293//phosphatase complex;GO:0044464//cell part;GO:0043231//intracellular membrane-bounded organelle;GO:0032991//macromolecular complex;GO:0005622//intracellular;GO:0043234//protein complex;GO:0043227//membrane-bounded organelle;GO:0008287//protein serine/threonine phosphatase complex;GO:1902494//catalytic c…	-	GO:0043086//negative regulation of catalytic activity;GO:0010921//regulation of phosphatase activity;GO:0032269//negative regulation of cellular protein metabolic process;GO:0044092//negative regulation of molecular function;GO:0050790//regulation of catalytic activity;GO:0051246//regulation of protein metabolic process;GO:0019222//regulation of metabolic process;GO:0035304//regulation of protein…
Unigene0006518	GDCSP	PREDICTED: glycine dehydrogenase (decarboxylating), mitochondrial [Nelumbo nucifera]	-	-	-
Unigene0029181	At4g17486	PREDICTED: desumoylating isopeptidase 2-like [Nelumbo nucifera]	-	-	-
Unigene0108475	EID1	PREDICTED: phytochrome A-associated F-box protein-like [Nelumbo nucifera]	-	-	GO:0009987//cellular process;GO:0009416//response to light stimulus;GO:0009628//response to abiotic stimulus;GO:0044700//single organism signaling;GO:0044237//cellular metabolic process;GO:0044260//cellular macromolecule metabolic process;GO:0050789//regulation of biological process;GO:0043170//macromolecule metabolic process;GO:0023052//signaling;GO:0007275//multicellular organism development;GO…
Unigene0010483	HVA22A	HVA22-like protein a [Anthurium amnicola]	GO:0044425//membrane part;GO:0016020//membrane;GO:0031224//intrinsic component of membrane	-	-
Unigene0052006	AHL10	PREDICTED: AT-hook motif nuclear-localized protein 14 [Nelumbo nucifera]	-	-	-
Unigene0093519	At1g06620	PREDICTED: 1-aminocyclopropane-1-carboxylate oxidase homolog 4-like [Nelumbo nucifera]	-	-	-
Unigene0063475	CAF1-7	PREDICTED: probable CCR4-associated factor 1 homolog 7 [Nelumbo nucifera]	GO:0043231//intracellular membrane-bounded organelle;GO:0043227//membrane-bounded organelle;GO:0043229//intracellular organelle;GO:0044464//cell part;GO:0043226//organelle;GO:0005622//intracellular;GO:0005623//cell;GO:0044424//intracellular part	GO:0003824//catalytic activity;GO:0016787//hydrolase activity;GO:0004518//nuclease activity;GO:0000175//3'-5'-exoribonuclease activity;GO:0004540//ribonuclease activity;GO:0016788//hydrolase activity, acting on ester bonds;GO:0004527//exonuclease activity;GO:0008408//3'-5' exonuclease activity;GO:0004532//exoribonuclease activity;GO:0016796//exonuclease activity, active with either ribo- or deoxy…	GO:0090305//nucleic acid phosphodiester bond hydrolysis;GO:0034641//cellular nitrogen compound metabolic process;GO:0044260//cellular macromolecule metabolic process;GO:0008152//metabolic process;GO:0090501//RNA phosphodiester bond hydrolysis;GO:0090304//nucleic acid metabolic process;GO:0043170//macromolecule metabolic process;GO:0016070//RNA metabolic process;GO:0006807//nitrogen compound metab…
Unigene0098188	-	protein DELETION OF SUV3 SUPPRESSOR 1(I) [Ananas comosus]	-	-	-
Unigene0006057	Alg13	PREDICTED: UDP-N-acetylglucosamine transferase subunit ALG13 homolog isoform X1 [Elaeis guineensis]	-	GO:0005488//binding;GO:0016757//transferase activity, transferring glycosyl groups;GO:0003824//catalytic activity;GO:0016740//transferase activity	GO:0006629//lipid metabolic process;GO:0044255//cellular lipid metabolic process;GO:0044763//single-organism cellular process;GO:0030258//lipid modification;GO:0071704//organic substance metabolic process;GO:0008152//metabolic process;GO:0044699//single-organism process;GO:0044237//cellular metabolic process;GO:0044238//primary metabolic process;GO:0044710//single-organism metabolic process;GO:00…
Unigene0089795	MT2	metallothionein-like protein type 3 [Ananas comosus]	-	-	GO:0048518//positive regulation of biological process;GO:0044767//single-organism developmental process;GO:0008104//protein localization;GO:0032535//regulation of cellular component size;GO:0055065//metal ion homeostasis;GO:0009987//cellular process;GO:0044707//single-multicellular organism process;GO:0050801//ion homeostasis;GO:0032502//developmental process;GO:0050794//regulation of cellular pr…
Unigene0014010	GAMMACAL2	PREDICTED: gamma carbonic anhydrase-like 2, mitochondrial [Nelumbo nucifera]	-	-	-
Unigene0088485	-	Senescence regulator [Cynara cardunculus var. scolymus] [Cynara cardunculus]	-	-	-
Unigene0060158	BRM	PREDICTED: ATP-dependent helicase BRM-like isoform X1 [Nelumbo nucifera]	GO:0044424//intracellular part;GO:0005622//intracellular;GO:0044464//cell part;GO:0005623//cell	GO:0003824//catalytic activity;GO:1901363//heterocyclic compound binding;GO:0016817//hydrolase activity, acting on acid anhydrides;GO:0097159//organic cyclic compound binding;GO:0005488//binding;GO:0016818//hydrolase activity, acting on acid anhydrides, in phosphorus-containing anhydrides;GO:0003676//nucleic acid binding;GO:0016787//hydrolase activity	GO:0034645//cellular macromolecule biosynthetic process;GO:0016043//cellular component organization;GO:0043170//macromolecule metabolic process;GO:0071704//organic substance metabolic process;GO:0065007//biological regulation;GO:0009059//macromolecule biosynthetic process;GO:0051276//chromosome organization;GO:0043933//macromolecular complex subunit organization;GO:0060255//regulation of macromol…
Unigene0104220	Znf385d	PREDICTED: zinc finger protein 346-like isoform X2 [Juglans regia]	-	-	-
Unigene0045945	At1g05000	PREDICTED: probable tyrosine-protein phosphatase At1g05000 [Nelumbo nucifera]	-	GO:0016788//hydrolase activity, acting on ester bonds;GO:0003824//catalytic activity;GO:0016787//hydrolase activity;GO:0042578//phosphoric ester hydrolase activity	GO:0043170//macromolecule metabolic process;GO:0009987//cellular process;GO:0008152//metabolic process;GO:0044238//primary metabolic process;GO:0044260//cellular macromolecule metabolic process;GO:0016311//dephosphorylation;GO:0006470//protein dephosphorylation;GO:0019538//protein metabolic process;GO:0071704//organic substance metabolic process;GO:0044267//cellular protein metabolic process;GO:0…
Unigene0065993	-	histone-lysine N-methyltransferase [Arabidopsis thaliana]	GO:0005737//cytoplasm;GO:0044424//intracellular part;GO:0044444//cytoplasmic part;GO:0005622//intracellular;GO:0044464//cell part;GO:0005623//cell	-	-
Unigene0082588	DRP3A	Dynamin-related protein 3A, partial [Anthurium amnicola]	-	GO:0005488//binding;GO:0001883//purine nucleoside binding;GO:0016818//hydrolase activity, acting on acid anhydrides, in phosphorus-containing anhydrides;GO:0003824//catalytic activity;GO:0097159//organic cyclic compound binding;GO:0017111//nucleoside-triphosphatase activity;GO:0036094//small molecule binding;GO:0016817//hydrolase activity, acting on acid anhydrides;GO:1901363//heterocyclic compou…	-
Unigene0082761	AUL1	PREDICTED: auxilin-like protein 1 [Nelumbo nucifera]	-	-	-
Unigene0038384	FRS5	PREDICTED: protein FAR1-RELATED SEQUENCE 7 [Beta vulgaris subsp. vulgaris] [Beta vulgaris]	-	-	-
Unigene0041188	CBLL1	PREDICTED: E3 ubiquitin-protein ligase Hakai [Nelumbo nucifera]	-	-	-
Unigene0073108	Os11g0472000	PREDICTED: zinc finger CCCH domain-containing protein ZFN-like isoform X1 [Elaeis guineensis]	-	-	-
Unigene0103776	RPL7B	PREDICTED: 60S ribosomal protein L7-2-like [Nelumbo nucifera]	GO:0032991//macromolecular complex	-	-
Unigene0093478	Polr1d	PREDICTED: DNA-directed RNA polymerases I and III subunit RPAC2-like [Prunus mume]	GO:0043227//membrane-bounded organelle;GO:0005623//cell;GO:0043229//intracellular organelle;GO:0044424//intracellular part;GO:0044446//intracellular organelle part;GO:0070013//intracellular organelle lumen;GO:0005654//nucleoplasm;GO:0043231//intracellular membrane-bounded organelle;GO:0005634//nucleus;GO:0031974//membrane-enclosed lumen;GO:0044451//nucleoplasm part;GO:0044422//organelle part;GO:0…	GO:0016779//nucleotidyltransferase activity;GO:0005515//protein binding;GO:0034062//RNA polymerase activity;GO:0003824//catalytic activity;GO:0016772//transferase activity, transferring phosphorus-containing groups;GO:0016740//transferase activity;GO:0005488//binding	GO:0009987//cellular process;GO:0043170//macromolecule metabolic process;GO:1901576//organic substance biosynthetic process;GO:0044249//cellular biosynthetic process;GO:0071704//organic substance metabolic process;GO:0044260//cellular macromolecule metabolic process;GO:0009059//macromolecule biosynthetic process;GO:0034645//cellular macromolecule biosynthetic process;GO:0008152//metabolic process…
Unigene0049993	At4g18820	PREDICTED: protein STICHEL-like 3 isoform X1 [Nelumbo nucifera]	-	-	-
Unigene0053491	PRS3	PREDICTED: ribose-phosphate pyrophosphokinase 4 isoform X1 [Nelumbo nucifera]	-	-	-
Unigene0026753	Snd1	PREDICTED: staphylococcal nuclease domain-containing protein 1 [Nelumbo nucifera]	-	-	GO:0065007//biological regulation;GO:0009987//cellular process;GO:0060255//regulation of macromolecule metabolic process;GO:0010605//negative regulation of macromolecule metabolic process;GO:0016458//gene silencing;GO:0010468//regulation of gene expression;GO:0010629//negative regulation of gene expression;GO:0044763//single-organism cellular process;GO:0019222//regulation of metabolic process;GO…
Unigene0057368	PAB2	PREDICTED: polyadenylate-binding protein 2 [Amborella trichopoda]	GO:0043231//intracellular membrane-bounded organelle;GO:0043229//intracellular organelle;GO:0044424//intracellular part;GO:0005623//cell;GO:0043226//organelle;GO:0044444//cytoplasmic part;GO:0043227//membrane-bounded organelle;GO:0044464//cell part;GO:0005622//intracellular;GO:0005737//cytoplasm	GO:0003676//nucleic acid binding;GO:0097159//organic cyclic compound binding;GO:0005488//binding;GO:1901363//heterocyclic compound binding	GO:0019222//regulation of metabolic process;GO:0044764//multi-organism cellular process;GO:0009987//cellular process;GO:0050789//regulation of biological process;GO:0051704//multi-organism process;GO:0065007//biological regulation;GO:0044419//interspecies interaction between organisms;GO:0016032//viral process;GO:0044403//symbiosis, encompassing mutualism through parasitism;GO:0010608//posttransc…
Unigene0021703	GRXC1	glutaredoxin, partial [Chimonanthus praecox]	-	GO:0016491//oxidoreductase activity;GO:0016667//oxidoreductase activity, acting on a sulfur group of donors;GO:0003824//catalytic activity;GO:0015036//disulfide oxidoreductase activity	GO:0042592//homeostatic process;GO:0044763//single-organism cellular process;GO:0065008//regulation of biological quality;GO:0019725//cellular homeostasis;GO:0044699//single-organism process;GO:0008152//metabolic process;GO:0065007//biological regulation;GO:0044710//single-organism metabolic process;GO:0009987//cellular process
Unigene0016486	TCP11	T-complex protein 11-like protein 1 [Ananas comosus]	-	-	-
Unigene0044971	-	--	-	-	-
Unigene0111985	At5g41670	PREDICTED: 6-phosphogluconate dehydrogenase, decarboxylating 1, chloroplastic isoform X1 [Citrus sinensis]	-	GO:0097159//organic cyclic compound binding;GO:0048037//cofactor binding;GO:1901265//nucleoside phosphate binding;GO:0000166//nucleotide binding;GO:0016614//oxidoreductase activity, acting on CH-OH group of donors;GO:0005488//binding;GO:0016491//oxidoreductase activity;GO:1901363//heterocyclic compound binding;GO:0003824//catalytic activity;GO:0036094//small molecule binding	GO:1901564//organonitrogen compound metabolic process;GO:0006807//nitrogen compound metabolic process;GO:0055086//nucleobase-containing small molecule metabolic process;GO:0019362//pyridine nucleotide metabolic process;GO:0006725//cellular aromatic compound metabolic process;GO:0006793//phosphorus metabolic process;GO:0044281//small molecule metabolic process;GO:0044710//single-organism metabolic…
Unigene0072886	ZEP	PREDICTED: zeaxanthin epoxidase, chloroplastic isoform X1 [Nelumbo nucifera]	-	-	-
Unigene0071952	HUA1	PREDICTED: zinc finger CCCH domain-containing protein 37 isoform X1 [Nelumbo nucifera]	-	-	-
Unigene0072884	ZEP	PREDICTED: zeaxanthin epoxidase, chloroplastic isoform X1 [Nelumbo nucifera]	-	-	-
Unigene0054017	Os05g0428700	PREDICTED: potassium channel AKT2 [Elaeis guineensis]	GO:0016020//membrane	-	GO:0009987//cellular process;GO:0044763//single-organism cellular process;GO:0006810//transport;GO:0055085//transmembrane transport;GO:0006811//ion transport;GO:1902578//single-organism localization;GO:0051179//localization;GO:0034220//ion transmembrane transport;GO:0051234//establishment of localization;GO:0044699//single-organism process;GO:0044765//single-organism transport;GO:0030001//metal i…
Unigene0046875	ALATS	PREDICTED: alanine--tRNA ligase [Nelumbo nucifera]	GO:0005623//cell;GO:0044464//cell part;GO:0044424//intracellular part;GO:0043226//organelle;GO:0043227//membrane-bounded organelle;GO:0005622//intracellular;GO:0043229//intracellular organelle;GO:0043231//intracellular membrane-bounded organelle	GO:0046872//metal ion binding;GO:0016876//ligase activity, forming aminoacyl-tRNA and related compounds;GO:0005488//binding;GO:0036094//small molecule binding;GO:0032549//ribonucleoside binding;GO:0016874//ligase activity;GO:0004812//aminoacyl-tRNA ligase activity;GO:0046914//transition metal ion binding;GO:0003824//catalytic activity;GO:0001882//nucleoside binding;GO:0043167//ion binding;GO:0032…	GO:0006725//cellular aromatic compound metabolic process;GO:0006520//cellular amino acid metabolic process;GO:0010467//gene expression;GO:0006418//tRNA aminoacylation for protein translation;GO:0034645//cellular macromolecule biosynthetic process;GO:0071704//organic substance metabolic process;GO:0043603//cellular amide metabolic process;GO:0043039//tRNA aminoacylation;GO:0034641//cellular nitrog…
Unigene0079903	DTXL3	PREDICTED: protein DETOXIFICATION 12-like [Phoenix dactylifera]	-	-	-
Unigene0039784	CYP19-4	PREDICTED: peptidyl-prolyl cis-trans isomerase CYP20-1-like isoform X3 [Nelumbo nucifera]	-	-	-
Unigene0029947	GBP2	PREDICTED: guanylate-binding protein 1-like [Nelumbo nucifera]	GO:0043229//intracellular organelle;GO:0044464//cell part;GO:0043232//intracellular non-membrane-bounded organelle;GO:0009536//plastid;GO:0043227//membrane-bounded organelle;GO:0005623//cell;GO:0043226//organelle;GO:0044444//cytoplasmic part;GO:0005737//cytoplasm;GO:0044424//intracellular part;GO:0043228//non-membrane-bounded organelle;GO:0005622//intracellular;GO:0043231//intracellular membrane-…	GO:0036094//small molecule binding;GO:0017111//nucleoside-triphosphatase activity;GO:0097367//carbohydrate derivative binding;GO:0016462//pyrophosphatase activity;GO:0001883//purine nucleoside binding;GO:0016787//hydrolase activity;GO:0097159//organic cyclic compound binding;GO:0001882//nucleoside binding;GO:0016818//hydrolase activity, acting on acid anhydrides, in phosphorus-containing anhydrid…	GO:0009987//cellular process;GO:0007017//microtubule-based process;GO:1902410//mitotic cytokinetic process;GO:0000281//mitotic cytokinesis;GO:0007049//cell cycle;GO:0044763//single-organism cellular process;GO:0044699//single-organism process;GO:0022402//cell cycle process;GO:0051301//cell division;GO:0061640//cytoskeleton-dependent cytokinesis;GO:0000278//mitotic cell cycle;GO:1903047//mitotic c…
Unigene0010239	-	PREDICTED: protein IQ-DOMAIN 1-like [Elaeis guineensis]	-	-	-
Unigene0029946	GBP2	PREDICTED: guanylate-binding protein 1-like [Nelumbo nucifera]	-	-	-
Unigene0003155	DBP	PREDICTED: remorin [Oryza sativa Japonica Group]	-	-	-
Unigene0058253	SPCC24B10.10c	PREDICTED: nuclear valosin-containing protein-like [Juglans regia]	-	GO:0003824//catalytic activity;GO:0032550//purine ribonucleoside binding;GO:0036094//small molecule binding;GO:0097159//organic cyclic compound binding;GO:0097367//carbohydrate derivative binding;GO:0001882//nucleoside binding;GO:1901363//heterocyclic compound binding;GO:0001883//purine nucleoside binding;GO:0032549//ribonucleoside binding;GO:0005488//binding	-
Unigene0055833	ERD15	PREDICTED: protein EARLY RESPONSIVE TO DEHYDRATION 15-like [Phoenix dactylifera]	-	-	-
Unigene0067780	AGD12	PREDICTED: probable ADP-ribosylation factor GTPase-activating protein AGD13 isoform X2 [Eucalyptus grandis]	-	-	-
Unigene0061797	-	Aminomethyl 32 [Prunus persica var. persica] [Prunus persica]	GO:0005737//cytoplasm;GO:0044464//cell part;GO:0044446//intracellular organelle part;GO:0005623//cell;GO:0043226//organelle;GO:0044424//intracellular part;GO:0005622//intracellular;GO:0044429//mitochondrial part;GO:0044422//organelle part;GO:0043231//intracellular membrane-bounded organelle;GO:0043229//intracellular organelle;GO:0005739//mitochondrion;GO:0043227//membrane-bounded organelle;GO:004…	-	GO:0006082//organic acid metabolic process;GO:0032787//monocarboxylic acid metabolic process;GO:0071704//organic substance metabolic process;GO:0008152//metabolic process;GO:0006520//cellular amino acid metabolic process;GO:0009069//serine family amino acid metabolic process;GO:1901615//organic hydroxy compound metabolic process;GO:0019752//carboxylic acid metabolic process;GO:0044281//small mole…
Unigene0067778	AGD12	ARF-GAP domain 13 isoform 3 [Theobroma cacao]	GO:0043226//organelle;GO:0044464//cell part;GO:0043227//membrane-bounded organelle;GO:0016020//membrane;GO:0043231//intracellular membrane-bounded organelle;GO:0005622//intracellular;GO:0043229//intracellular organelle;GO:0005623//cell;GO:0044424//intracellular part	GO:0008289//lipid binding;GO:0046914//transition metal ion binding;GO:0046872//metal ion binding;GO:0005488//binding;GO:0043169//cation binding;GO:0043167//ion binding	GO:0071702//organic substance transport;GO:0032502//developmental process;GO:0009987//cellular process;GO:1902578//single-organism localization;GO:0045184//establishment of protein localization;GO:0044699//single-organism process;GO:0034613//cellular protein localization;GO:0051641//cellular localization;GO:0006886//intracellular protein transport;GO:0051649//establishment of localization in cell…
Unigene0049198	TOR1	PREDICTED: microtubule-associated protein TORTIFOLIA1-like [Nelumbo nucifera]	-	-	-
Unigene0067543	SCAR2	PREDICTED: protein SCAR2-like [Nelumbo nucifera]	-	-	-
Unigene0007481	IP5P2	PREDICTED: type I inositol polyphosphate 5-phosphatase 2 [Theobroma cacao]	-	GO:0042578//phosphoric ester hydrolase activity;GO:0016788//hydrolase activity, acting on ester bonds;GO:0052745//inositol phosphate phosphatase activity;GO:0003824//catalytic activity;GO:0016791//phosphatase activity;GO:0016787//hydrolase activity	GO:0001101//response to acid chemical;GO:1901615//organic hydroxy compound metabolic process;GO:0051716//cellular response to stimulus;GO:0006793//phosphorus metabolic process;GO:0007154//cell communication;GO:0044281//small molecule metabolic process;GO:0071704//organic substance metabolic process;GO:0019637//organophosphate metabolic process;GO:0009719//response to endogenous stimulus;GO:005079…
Unigene0039783	CYP19-4	PREDICTED: peptidyl-prolyl cis-trans isomerase CYP20-1 [Nicotiana sylvestris]	-	-	-
Unigene0081734	TEB	PREDICTED: helicase and polymerase-containing protein TEBICHI isoform X1 [Nelumbo nucifera]	-	-	-
Unigene0077908	Atad1	AAA domain-containing protein/FHA domain-containing protein [Cephalotus follicularis]	-	GO:0003824//catalytic activity;GO:0016787//hydrolase activity	-
Unigene0054987	AAPT1	PREDICTED: choline/ethanolaminephosphotransferase 1 [Ziziphus jujuba]	-	GO:0016740//transferase activity;GO:0003824//catalytic activity;GO:0016772//transferase activity, transferring phosphorus-containing groups	-
[truncated: 593 more rows]

## Sheet: cellular component
Cellular component
GO ID	Description	GeneRatio (157)	BgRatio (5017)	pvalue	p.adjust	geneID
[truncated: 98 more rows]

## Sheet: molecular function
Molecular function
[truncated: 184 more rows]

## Sheet: biological process
Biological process
[truncated: 731 more rows]
