# Supplementary figures and images for: Small RNA and Degradome Sequencing in Floral Bud Reveal Roles of miRNAs in Dormancy Release of Chimonanthus praecox
Source: MDPI journal article supplement (doi:10.3390/ijms24044210), 2023-02-20

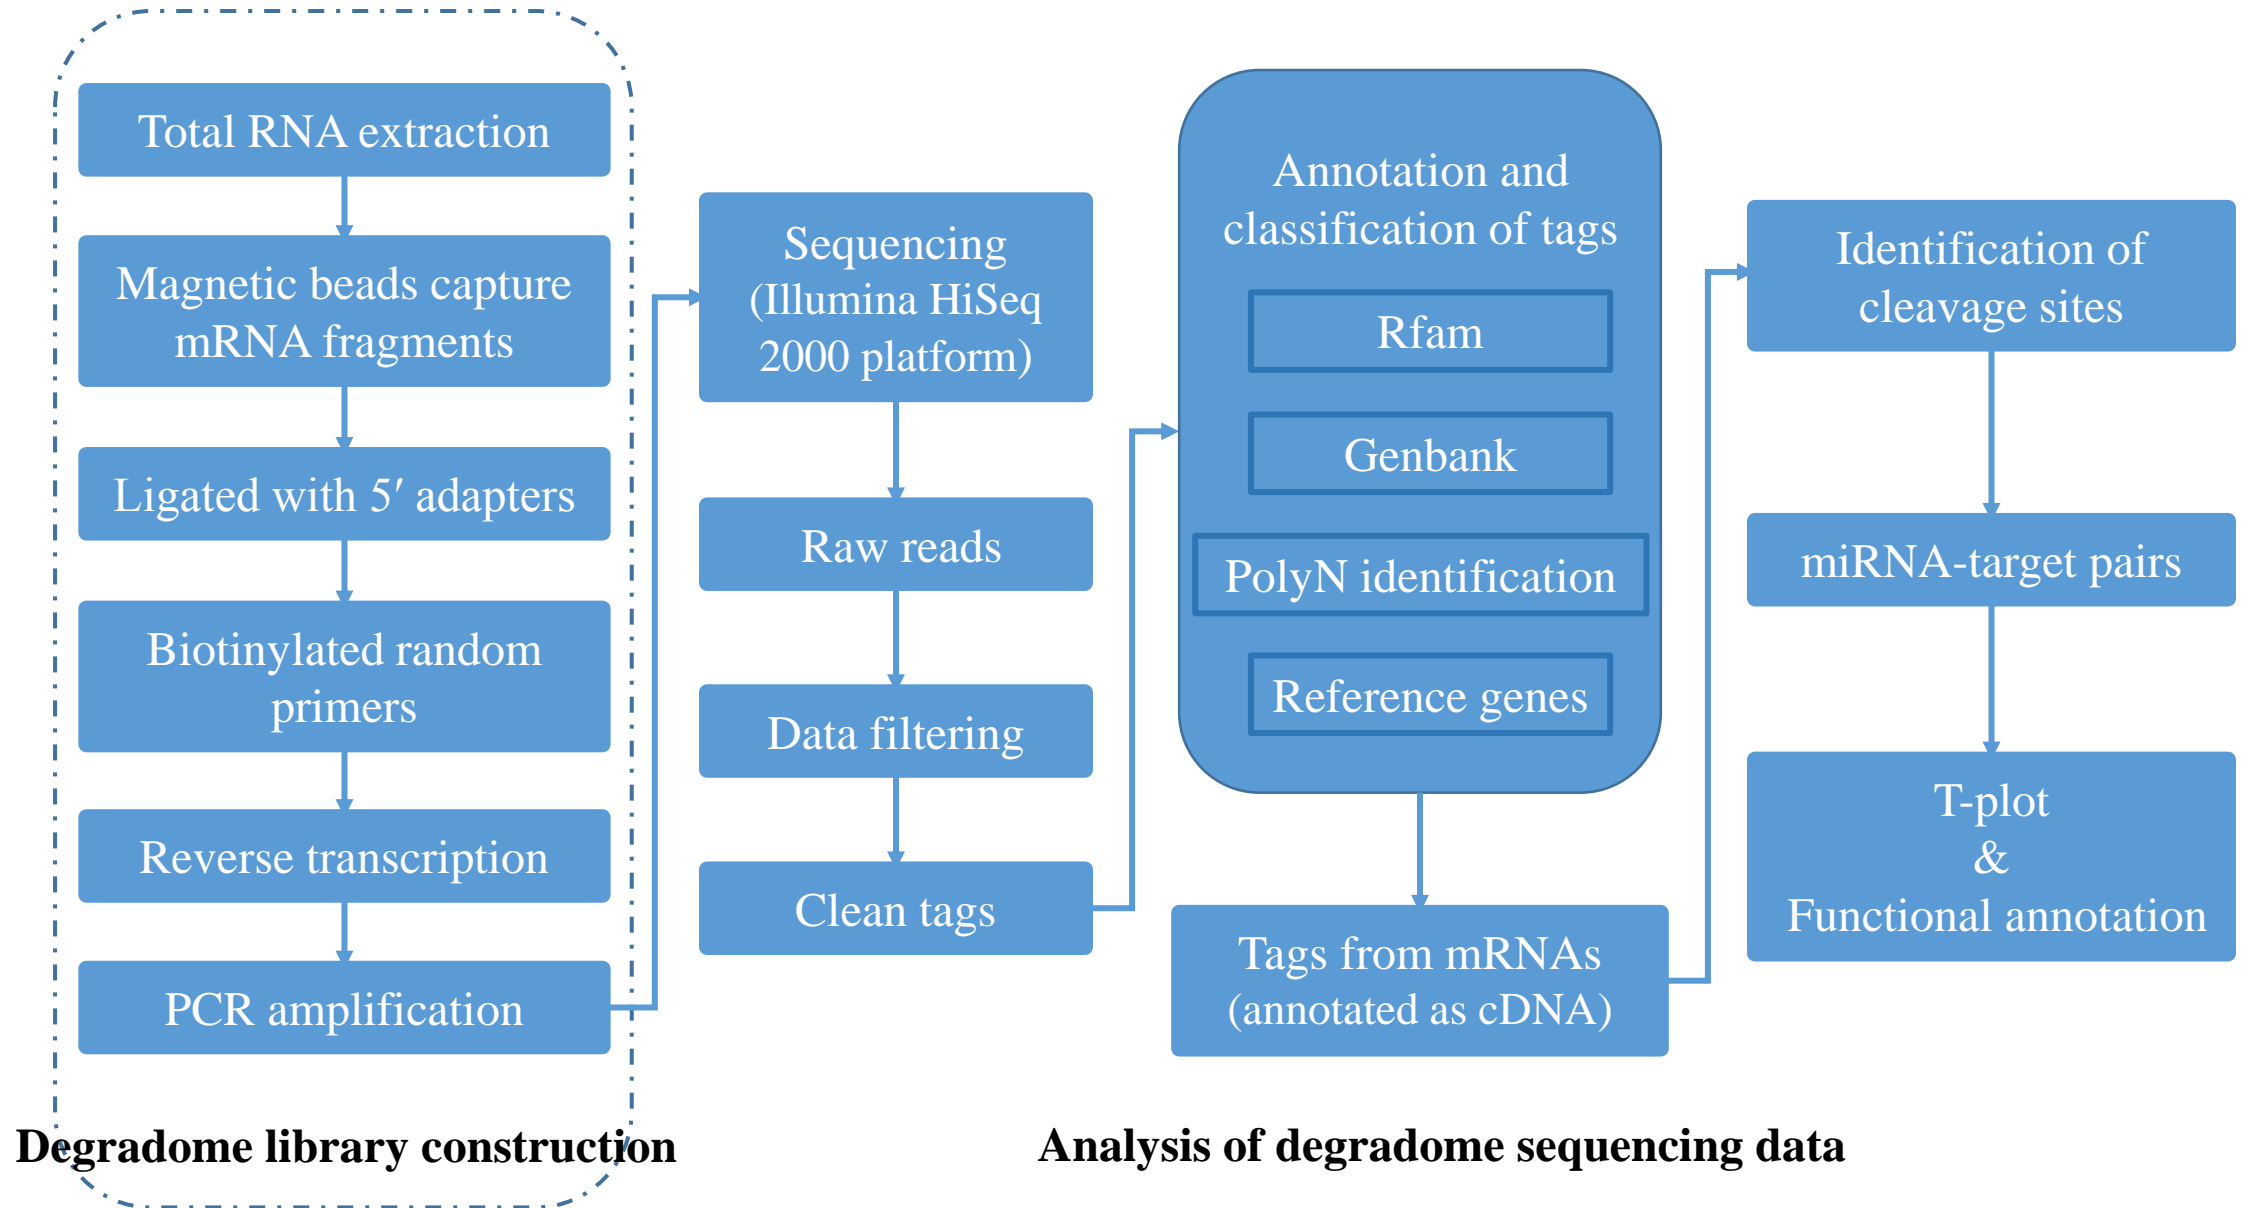

Supplement: s1 [file s1]

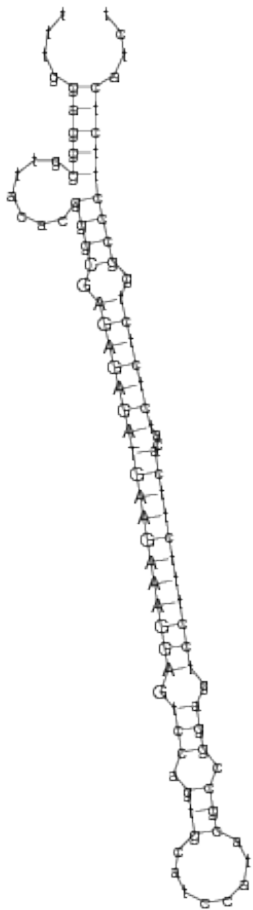

novel-m0010

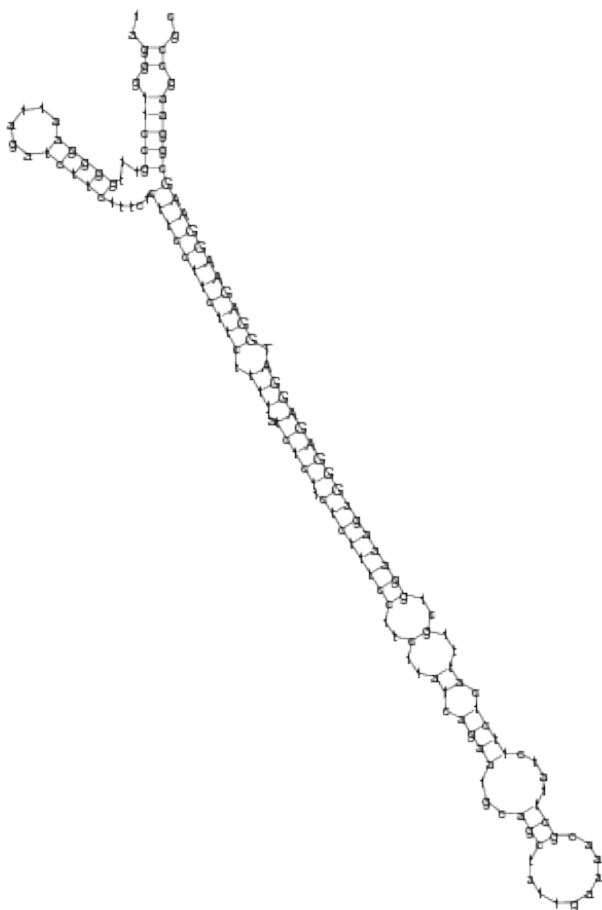

novel-m0059

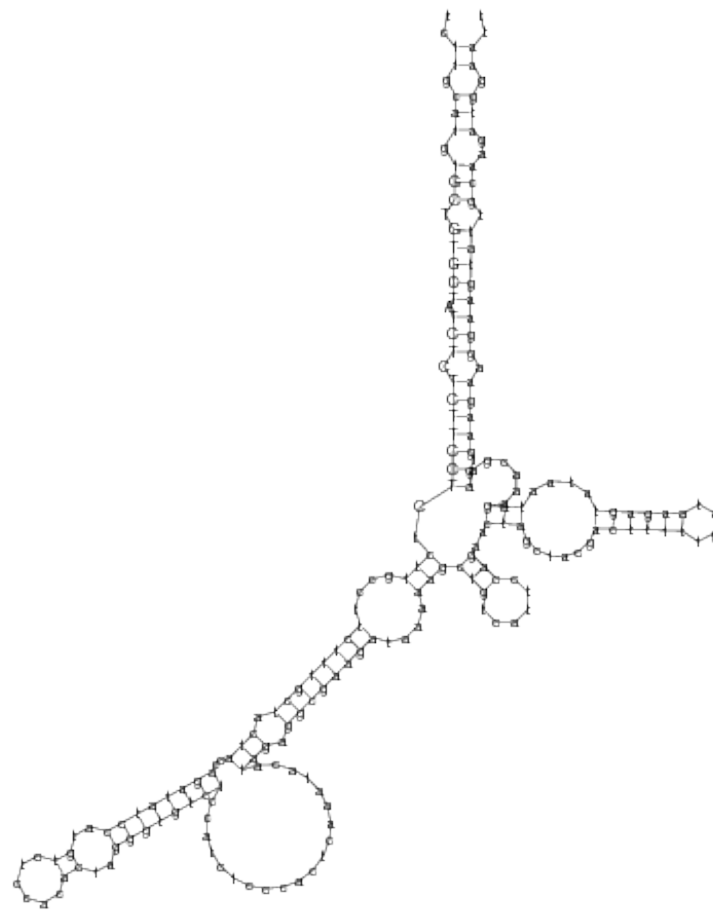

novel-m0082

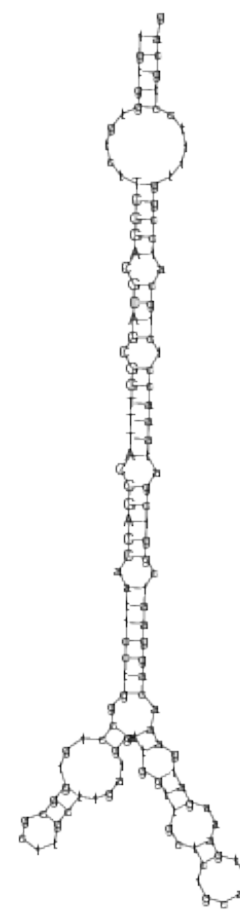

novel-m0182

Supplement: s1 [file s1]

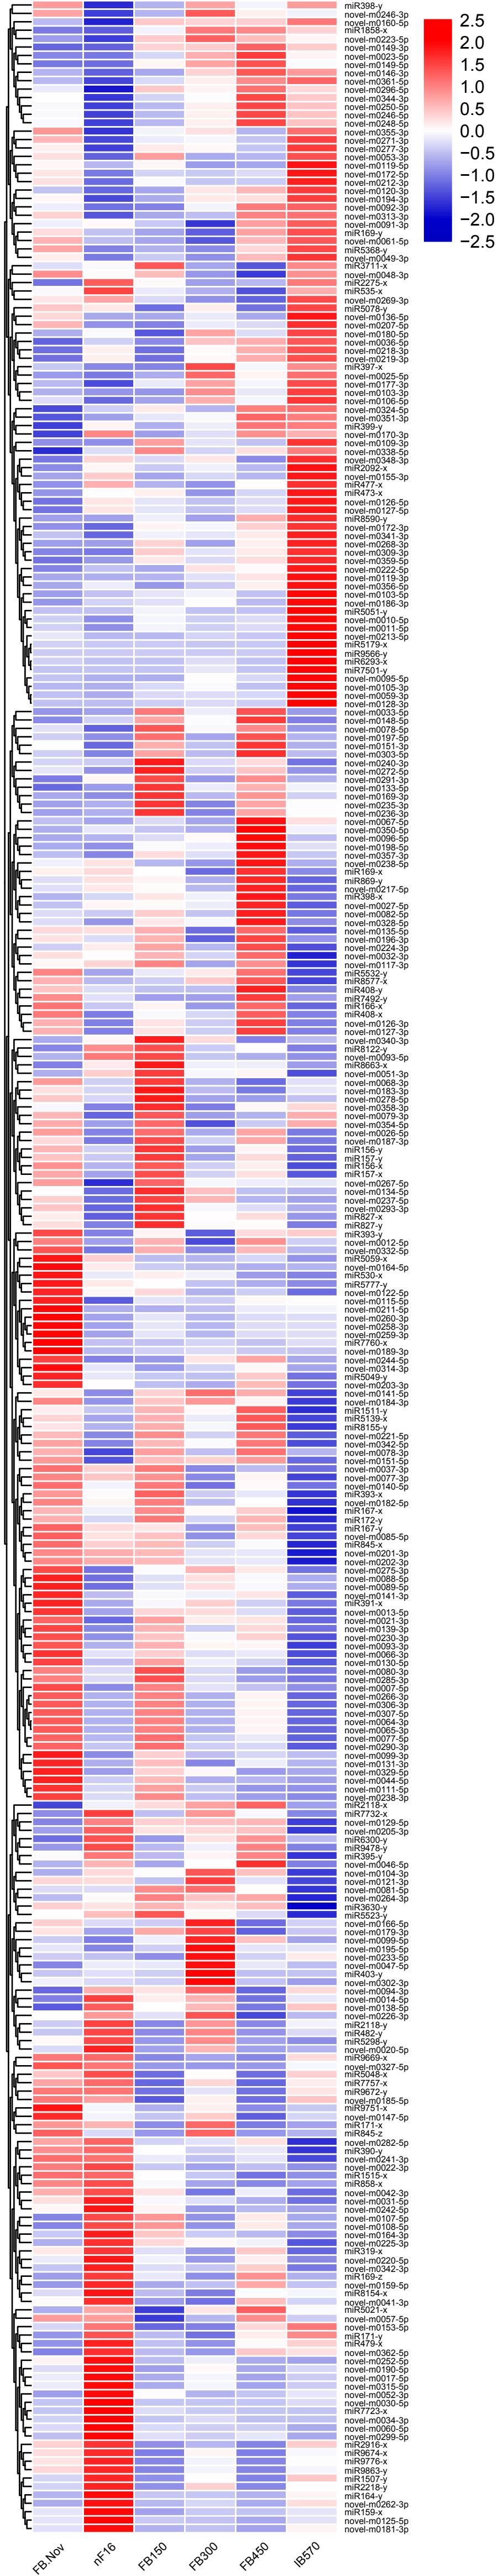

Supplement: s1 [file s1]
